# Supplementary material for: Direct arylation polymerization of electron-rich arenes with polar-group tolerance enabled by ligand-coordination tuning
Source: Royal Society of Chemistry journal article supplement (doi:10.1039/d6sc00984k), 2026-05-07
Supplement: d6sc00984k1.pdf [file d6sc00984k1.pdf]

## Supporting Information

### Direct Arylation Polymerization of Electron-Rich Arenes with Polar Groups Enabled by Ligand-Coordination Tuning

Xilin Pei<sup>1,2,3,4</sup>, Wei Wu<sup>1,3,4</sup>, Yanlu Sun<sup>5</sup>, Quan Yang<sup>1,3,4</sup>, Jianan Weng<sup>1,3,4</sup>, Shuhua Zhang<sup>1,3,4</sup>, Zhi Geng<sup>1,3,4</sup>, Bo Zhu<sup>1,3,4</sup>\*,

1. School of Materials Science and Engineering, Shanghai University, Shanghai 200444, China. 2. State Key Laboratory for Modification of Chemical Fibers and Polymer Materials, Innovation Center for Textile Science & Technology, College of Material Science and Engineering, Donghua University, Shanghai 201620, China. 3. Shanghai Engineering Research Center of Organ Repair, Shanghai University, Shanghai 200444, China. 4. Joint International Research Laboratory of Biomaterials and Biotechnology in Organ Repair, Ministry of Education 5. College of Textiles, Donghua University, Shanghai 201620, China.

#### Table of Contents

|                                                                                  |            |
|----------------------------------------------------------------------------------|------------|
| <b>1 General Information .....</b>                                               | <b>2</b>   |
| <b>2. Preparation and Characterization of Substrates .....</b>                   | <b>3</b>   |
| <b>3. Preparation and Characterization of Functionalized EDOT Polymers .....</b> | <b>8</b>   |
| <b>4. Small Molecule Model Reaction .....</b>                                    | <b>19</b>  |
| <b>5. Computational Studies .....</b>                                            | <b>21</b>  |
| <b>6. Cartesian Coordinates .....</b>                                            | <b>40</b>  |
| <b>7. NMR Spectra .....</b>                                                      | <b>245</b> |
| <b>8. References and Notes.....</b>                                              | <b>349</b> |



---

## 1 General Information

Unless otherwise stated, all solvents and chemical reagents were purchased from commercial sources (Macklin, Greagent-reagent, Adamas Chemical Co., Alfa Aesar, Sigma-Aldrich, TRC and TCI) and used without further purifications.

$^1\text{H}$  (600 MHz) and  $^{31}\text{P}$  (243 MHz) nuclear magnetic resonance (NMR) spectra were recorded at room temperature on an Avance III HD NMR spectrometer (Bruker Co., Switzerland), respectively. The NMR spectra of Rh-phosphine complexes were registered in its  $\text{CDCl}_3$  solution (32 scans for  $^1\text{H}$  and 128 scans for  $^{31}\text{P}$ ). The NMR spectra of PEE-OH, PEE-NH<sub>2</sub> and PPE-NH<sub>2</sub> were registered in its  $\text{DMSO-d}_6/\text{N}_2\text{D}_4 \cdot \text{D}_2\text{O-d}_6$  (v/v = 100:1) solution (512 scans). The NMR spectra of PPE-OH were registered in its  $\text{DMSO-d}_6$  solution (512 scans). The NMR spectra of PEE-COOH and PPE-COOH were registered in its  $\text{DMSO-d}_6/\text{D}_2\text{O}/\text{N}_2\text{D}_4 \cdot \text{D}_2\text{O-d}_6$  (v/v/v = 100:5:1) solution (512 scans). Before measurement, these functionalized EDOT polymers were heated at 40 °C for more than 24 h to ensure their thorough dissolution in the specified deuterated solvents.

Ultraviolet-visible (UV-Vis) absorption spectra were recorded on a Shimadzu UV-3600 Plus spectrometer. All UV-Vis spectral data had been normalized by maximal intensity.

## 2. Preparation and Characterization of Substrates

### 2.1 Preparation of monomer repeating units.

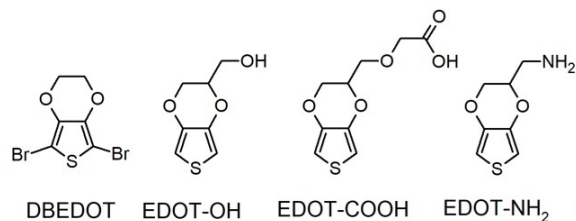

**Scheme S1** Structures of EDOT monomers used for direct arylation polymerization.

2,5-Dibromo-3,4-ethylenedioxythiophene (DBEDOT) was synthesized following procedures previously reported<sup>1</sup>. Hydroxyl-functionalized EDOT (EDOT-OH) was custom-synthesized by following the previously reported method<sup>2</sup>. Carboxyl-functionalized EDOT (EDOT-COOH) was also synthesized following the previous approach<sup>3</sup>. Amine-functionalized EDOT (EDOT-NH<sub>2</sub>) was synthesized following previously reported procedures<sup>4</sup>.

### 2.2 General procedure to prepare Rh-phosphine complexes.

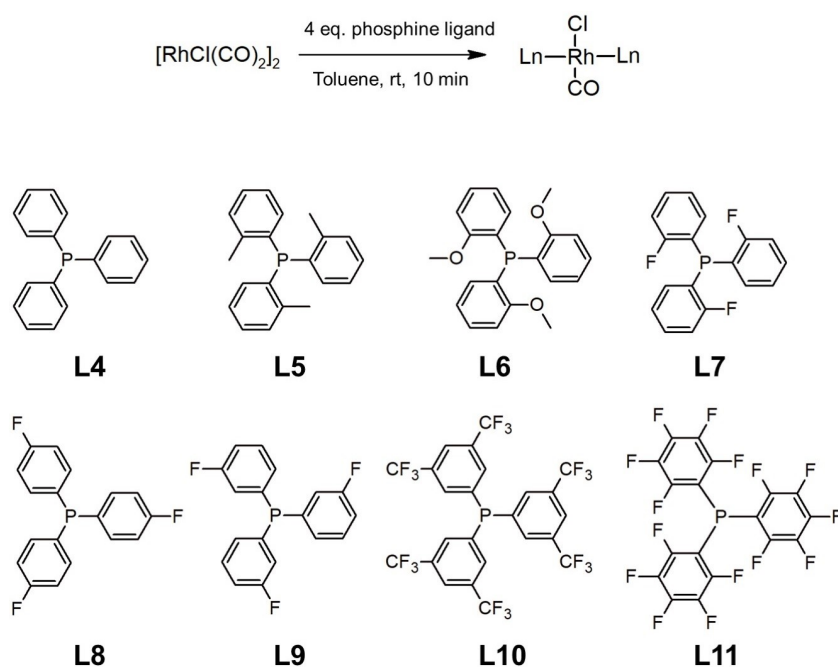

**Scheme S2** Synthesis of Rh-phosphine complexes.

---

A general method was employed in this study for the preparation of Rh-phosphine complexes  $[\text{RhClCO}(\text{Ln})_2]$  ( $\text{Ln}=\text{L4-L11}$ ). The reaction vial was charged with  $[\text{RhCl}(\text{CO})_2]_2$  (3.9 mg, 0.01 mmol), phosphine ligand (4 eq. vs. Rh source), and toluene (1 mL). The reaction mixture was stirred at room temperature under an air atmosphere for 10 min. At the end of the reaction, the precipitate was filtered and dried in a vacuum without further purification unless otherwise stated.

### 2.3 Synthesis of $\text{RhClCO}(\text{L4})_2$ .

$\text{RhClCO}(\text{L4})_2$  was synthesized following the abovementioned general procedure. Light yellow powder (11.0 mg, 80 % yield).  $^1\text{H}$  NMR (600 MHz,  $\text{CDCl}_3$ ):  $\delta$  7.77 – 7.72 (m, 12H), 7.47 – 7.37 (m, 18H).  $^{31}\text{P}$  NMR (243 MHz,  $\text{CDCl}_3$ ):  $\delta$  28.95 (d,  $J_{\text{Rh-P}} = 126.23$  Hz).

### 2.4 Synthesis of $\text{RhClCO}(\text{L5})_2$ .

$\text{RhClCO}(\text{L5})_2$  was synthesized following the abovementioned general procedure. Light yellow powder (8.5 mg, 55 % yield).  $^1\text{H}$  NMR (600 MHz,  $\text{CDCl}_3$ ):  $\delta$  7.35 (t,  $J = 7.5$  Hz, 3H), 7.20 (p,  $J = 7.5$  Hz, 9H), 2.38 (s, 9H).  $^{31}\text{P}$  NMR (243 MHz,  $\text{CDCl}_3$ ):  $\delta$  25.96 (m).

### 2.5 Synthesis of $\text{RhClCO}(\text{L6})_2$ .

$\text{RhClCO}(\text{L6})_2$  was synthesized following the abovementioned general procedure. Light yellow powder (11.0 mg, 63 % yield).  $^1\text{H}$  NMR (600 MHz,  $\text{CDCl}_3$ ):  $\delta$  7.74 (s, 3H), 7.34 (td,  $J = 7.8, 1.7$  Hz, 3H), 6.90 (t,  $J = 7.5$  Hz, 3H), 6.81 (d,  $J = 8.3$  Hz, 3H), 3.53 (s, 9H).  $^{31}\text{P}$  NMR (243 MHz,  $\text{CDCl}_3$ ):  $\delta$  17.98 (d,  $J_{\text{Rh-P}} = 133.41$  Hz).

### 2.6 Synthesis of $\text{RhClCO}(\text{L7})_2$ .

$\text{RhClCO}(\text{L7})_2$  was synthesized following the abovementioned general procedure. Light yellow powder (13.4 mg, 84 % yield).  $^1\text{H}$  NMR (600 MHz,  $\text{CDCl}_3$ ):  $\delta$  7.79 (p,  $J = 7.0$  Hz, 3H), 7.48 (tdd,  $J = 7.4, 5.1, 1.7$  Hz, 3H), 7.20 (d,  $J = 7.6$  Hz, 3H), 7.08 (t,  $J = 8.9$  Hz, 3H).  $^{31}\text{P}$  NMR (243 MHz,  $\text{CDCl}_3$ ):  $\delta$  10.38 (dm,  $J_{\text{Rh-P}} = 136.03$  Hz).

---

### 2.7 Synthesis of RhCICO(L8)<sub>2</sub>.

**RhCICO(L8)<sub>2</sub>** was synthesized following the abovementioned general procedure and precipitated in ethanol after being concentrated. The precipitate was filtered and dried over a vacuum. Light yellow powder (11.3 mg, 71% yield). <sup>1</sup>H NMR (600 MHz, CDCl<sub>3</sub>): δ 7.68 (dq, *J* = 7.3, 5.2 Hz, 6H), 7.13 (t, *J* = 8.5 Hz, 6H). <sup>31</sup>P NMR (243 MHz, CDCl<sub>3</sub>): δ 26.82 (d, *J*<sub>Rh-P</sub> = 127.93 Hz).

### 2.8 Synthesis of RhCICO(L9)<sub>2</sub>.

**RhCICO(L9)<sub>2</sub>** was synthesized following the abovementioned general procedure and precipitated in ethanol after being concentrated. The precipitate was filtered and dried over a vacuum. Light yellow powder (13.2 mg, 83 % yield). <sup>1</sup>H NMR (600 MHz, CDCl<sub>3</sub>): δ 7.53 (d, *J* = 7.6 Hz, 3H), 7.50 – 7.37 (m, 6H), 7.19 (td, *J* = 8.3, 2.6 Hz, 3H). <sup>31</sup>P NMR (243 MHz, CDCl<sub>3</sub>): δ 30.11 (d, *J*<sub>Rh-P</sub> = 130.34 Hz).

### 2.9 Synthesis of RhCICO(L10)<sub>2</sub>.

**RhCICO(L10)<sub>2</sub>** was synthesized following the abovementioned general procedure. Orange powder (23.49 mg, 79 % yield). <sup>1</sup>H NMR (600 MHz, CDCl<sub>3</sub>): δ 8.23 – 8.00 (m, 9H). <sup>31</sup>P NMR (243 MHz, CDCl<sub>3</sub>): δ 32.73 (dm, *J*<sub>Rh-P</sub> = 133.99 Hz).

### 2.10 Synthesis of RhCICO(L11)<sub>2</sub>.

**RhCICO(L11)<sub>2</sub>** was synthesized following the abovementioned general procedure. Yellow powder (20.4 mg, 83 % yield). <sup>31</sup>P NMR (243 MHz, CDCl<sub>3</sub>): δ -23.88 (d, *J*<sub>Rh-P</sub> = 150.95 Hz).

## 2.11 Electronic properties of phosphine ligands

**Table S1** Data of  $^{31}\text{P}$  NMR spectra and Tolman cone angle <sup>a</sup> of aryl-phosphine ligands.

| Ligand | $\delta$ P/ppm<br>(P ligands) | $\delta$ P/ppm<br>(Rh-P complexes) | $J_{\text{Rh-P}}/\text{Hz}$ | Tolman Cone<br>Angle $\theta/^\circ$ |
|--------|-------------------------------|------------------------------------|-----------------------------|--------------------------------------|
| L4     | -5.45                         | 29.22 / 28.70                      | 126.23                      | 124.44                               |
| L5     | -29.58                        | 25.96                              | -                           | 149.33                               |
| L6     | -39.68                        | 18.28 / 17.73                      | 133.41                      | 145.67                               |
| L7     | -42.45                        | 10.66 / 10.10                      | 136.03                      | 134.41                               |
| L8     | -9.10                         | 27.07 / 26.64                      | 127.93                      | 124.83                               |
| L9     | -4.81                         | 30.38 / 29.85                      | 130.34                      | 125.58                               |
| L10    | -4.18                         | 33.02 / 32.47                      | 133.99                      | 134.37                               |
| L11    | -74.30                        | 23.56 / 24.18                      | 150.95                      | 141.64                               |

<sup>a</sup> Tolman cone angle  $\theta$  of phosphine ligands was calculated by Solid-G software, and more details can be found in Section 4 of Supplementary materials.

The coupling constant ( $J_{\text{Rh-P}}$ ) can serve as an indicator of the electron-donating strength (EDS) of phosphine ligands in binding with electrophilic transition metals.  $J_{\text{Rh-P}}$  is dominated by the Fermi-contact term<sup>5</sup> and can be expressed by the equation 1, where A and B are constants.  $a_M$  and  $a_P$  denote the percentages of s-character on metal M and phosphorus, respectively.  $S_{M-P}$  is the overlap integral for the Rh-P bond.

$$J_{M-P} = \frac{Aa_M^2 a_P^2}{1 + S_{M-P}^2} + B \quad (1)$$

In the case of L1-L3, no evidence had been found to indicate the formation of Rh-P(L1-L3) complexes. For other ligands, their phosphorus chemical shifts presented a downfield shift, indicating the depletion of electron density and the formation of complexes with Rh. The  $J_{\text{Rh-P}}$  values for the complexes with aryl-phosphine ligands (L7–L11) increased with the introduction of the electron-withdrawing substituents onto aryls of ligands, compared to that of the complex with L4. It indicates that the incorporation of electron-withdrawing substituents onto aryls of phosphine ligands

---

results in a reduction in the overlap integral value of  $S_{M-P}$ , which corresponds to the hybridization between atoms Rh and P, and thus a higher  $J_{Rh-P}$ . As shown in Table S1, the  $J_{Rh-P}$  values of most ligands increase reasonably with the number of electron-withdrawing substituents. However, the  $J_{Rh-P}$  value of the L7 ligand deviate a lot from this dependence. The steric hindrance of the ligand might play a critical role in the interaction of ligands with transition metal. For evaluating this effect, the Tolman cone angles of phosphine ligands were calculated using Solid-G software (More calculation details are in Supplementary information Section 4). Reasonably, the ortho-site aryl substitution for the L7 ligand led to a larger Tolman cone angle of phosphine ligands. Similarly, due to the ortho-site aryl substitution for aryl phosphine ligands, the  $J_{Rh-P}$  values  $RhClCO(L11)_2$  should be also higher than expected. That is, the coordination strength of phosphine ligands is decided by both the electronic properties and steric hindrance of substituents. On the other hand, we also included the aryl-phosphine ligands with electron-donating groups on aryls, which should have a smaller  $J_{Rh-P}$  value than the L4 ligand. Unfortunately, for the aryl-phosphine ligand with the methyl substituent(L5), the  $^{31}P$  signal of  $RhClCO(L5)_2$  is significantly broadening, leading to the indeterminate coupling unobservable. Interestingly, for the aryl-phosphine ligand with the methoxyl substituents on aryl, the  $J_{Rh-P}$  is not smaller but higher than that of the L4 ligand without aryl substituents. We considered that the methoxyl group of the L6 ligand competes with the phosphorus atom in interacting with the transition metal, leading to a smaller contribution of phosphorus and a higher  $J_{Rh-P}$  value for the L6 ligand. It thus explains why the  $J_{Rh-P}$  value for the complexes with the L6 ligand is not as low as expected based on the electronic property of substituents (i.e., EDS). In addition, the steric hindrance of the L6 ligand should have an impact on its interaction with transition metal because of its ortho-site aryl substitution.

---

### **3. Preparation and Characterization of Functionalized EDOT Polymers**

#### **3.1 General procedure for preparation of functionalized EDOT polymers.**

A general method was applied to synthesize all the polymers described in this publication. A Schlenk tube was charged with functionalized EDOT monomer (1 eq.), arene dibromide (1 eq.), palladium acetate (10 mol %), potassium pivalate (2 eq.), phosphine ligand (20 mol %), N,N-dimethylacetamide (DMAc) (0.125 M) and a magnetic stir bar in glovebox at a 0.25 mmol scale. The mixture was heated in an oil bath at the desired temperature with vigorous stirring. After the polymerization was completed, the tube was extracted from the oil bath and cooled to ambient temperature in the air. The mixture was added drop by drop to 200 mL methanol, causing solid precipitation. The precipitate was filtered off and purified in a Soxhlet extraction thimble using acetone and methanol to wash it thoroughly. Finally, it was dried under a vacuum overnight to give the final product.

#### **3.2 The molecular weight measurement of functionalized EDOT polymers.**

The copolymers of EDOT derivatives with EDOT are typically insoluble in both organic solvents, such as dichloromethane (DCM), chloroform, tetrahydrofuran (THF), toluene, chlorobenzene, 1,2,4-trichlorobenzene (TCB), N,N-dimethylformamide (DMF), N,N-dimethylacetamide (DMAc), and dimethylsulfoxide (DMSO), and deionized water due to their susceptibility to doping, posing a challenge for analyzing the molecular weight of these polymers. However, adding a reductant (85% hydrazine hydrate,  $\text{N}_2\text{H}_4 \cdot \text{H}_2\text{O}$ ) can significantly facilitate the dissolution of these functionalized polymers in solvents (DMAc and DMSO) for analyzing their characteristics. The copolymer of EDOT-OH with EDOT (PEE-OH) and that of EDOT-NH<sub>2</sub> with EDOT (PEE-NH<sub>2</sub>) were found to be well soluble in DMSO containing 1% v/v hydrazine, while the copolymer of EDOT-COOH with EDOT (PEE-COOH) well soluble in  $\text{N}_2\text{H}_4 \cdot \text{H}_2\text{O}$  (85%).

---

In contrast, the copolymers of EDOT derivatives with benzene present better solubility than those of EDOT derivatives with EDOT. The copolymer of EDOT-OH with benzene (PPE-OH) is soluble in DMSO, while the copolymer of EDOT-COOH with benzene (PPE-COOH) and the copolymer of EDOT-NH<sub>2</sub> with benzene (PPE-NH<sub>2</sub>) are slightly soluble in deionized water and DMSO, respectively. Moreover, the addition of hydrazine to the solvent significantly enhances their solubility. Specifically, PPE-COOH dissolves well in N<sub>2</sub>H<sub>4</sub>·H<sub>2</sub>O (85%), while PPE-OH and PPE-NH<sub>2</sub> exhibit excellent solubility in DMSO with 1% v/v N<sub>2</sub>H<sub>4</sub>·H<sub>2</sub>O.

The gel permeation chromatography (GPC) measurements were performed on the Agilent 1260 Infinity II system equipped with the PLgel 300 × 7.5 mm column and the PL aqua gel-OH 20 (8μm 300 × 7.5 mm) column (Agilent, USA) to the molecular weight of functional EDOT polymers in the presence of hydrazine. However, since the dissolution of these EDOT polymers requires the addition of hydrazine hydrate (~1%), we were unable to obtain stable molecular weight results. One of most plausible explanations is that the GPC column may absorb the hydrazine hydrate, destabilizing the solution and affecting the measurements. Additionally, the Ubbelohd viscometer measurement was carried out to determine the average molecular weight of these functional EDOT polymers. However, the adsorption of free polar groups on these polymers onto the walls of the capillary prevented the acquisition of a linear intrinsic viscosity curve. Finally, we have to use the liquid <sup>1</sup>H NMR spectroscopy to measure the degree of polymerization (DP) and number-average molecular weight (M<sub>n</sub>) of functionalized EDOT polymers<sup>6</sup>.

To clarify the quantification of brominated chain ends of polymers synthesized by direct arylation polymerization, we carried out copolymerization studies of EDOT-OH with a series of thiophene-based dibromides. Unfortunately, dibromo-EDOT (DBEDOT) is structurally unsuitable for this purpose because it lacks protons adjacent to the terminal bromine atoms, preventing observation of diagnostic end-group signals. 1,4-dibromobenzene produced aromatic resonances in the δ 7.2–8.0 ppm region after reaction, overlapping end-group signals and precluding reliable integration.

These limitations motivated the use of 2,5-dibromo-3-methylthiophene instead, whose position-4 proton provides a distinct and isolated resonance suitable for end-group analysis. Copolymerizations of EDOT-OH with 2,5-dibromo-3-methylthiophene were therefore carried out under the general polymerization conditions for L11. At reaction times of 10, 30, and 60 min (Table S2), two well-resolved end-group signals were observed: (1) the proton of terminal EDOT-OH appeared as a doublet at  $\delta$  6.59 ppm, and (2) the position-4 proton of the terminal bromothiophene appeared as a well-isolated doublet at  $\delta$  6.71 ppm. Quantitative analysis across five independent batches yielded an average integration ratio of terminal EDOT-OH C-H to terminal thiophene C-Br ( $1.00 \pm 0.01$ ) (Figure S1). Time-dependent measurements (10–60 min) showed nearly constant ratios (0.99–1.01), indicating that H-terminated ends consistently account for  $50 \pm 1\%$  of all chain ends.

**Table S2** Summary of yield molecular weight and degree of polymerization for synthesis of PTE-OH .

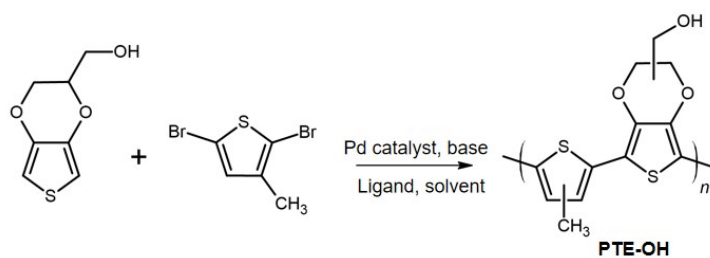

| Entry | Ligand | Temp. (°C) | Time (min) | Yield (%) | $M_n$ by $^1\text{H}$ NMR (C-H) (kg/mol) | $M_n$ by $^1\text{H}$ NMR (C-Br) (kg/mol) |
|-------|--------|------------|------------|-----------|------------------------------------------|-------------------------------------------|
| 1     | L11    | 120        | 10         | 61        | 3.63                                     | 3.66                                      |
| 2     | L11    | 120        | 30         | 90        | 4.00                                     | 4.00                                      |
| 3     | L11    | 120        | 60         | 91        | 5.39                                     | 5.36                                      |

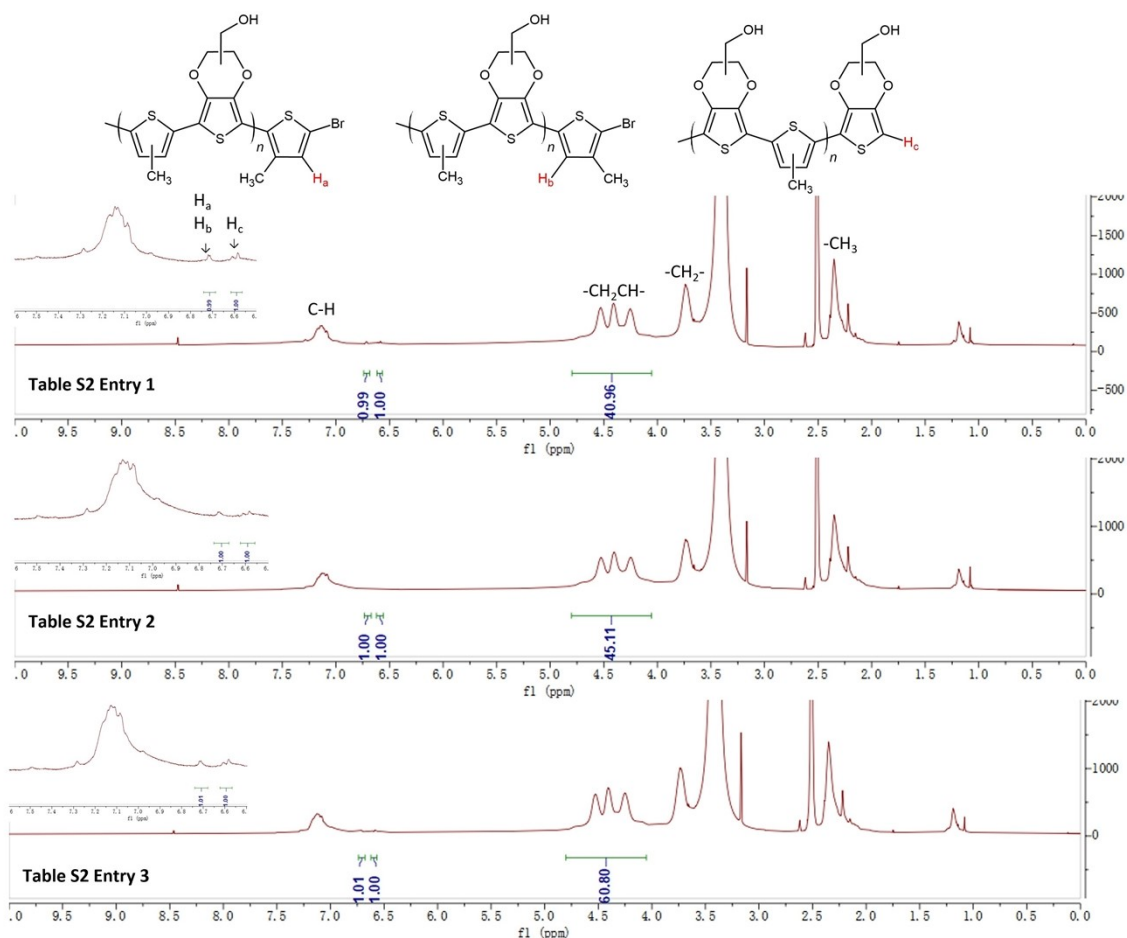

**Figure S1**  $^1\text{H}$  NMR of PTE-OH with entry 1-3 of Table S2 [600MHz, dimethyl sulfoxide- $d_6$  323K]

Therefore, the DP of PEEs was calculated according to the following equation:

$$DP_{PEE} = \frac{I_{\text{ethylenedioxiide}}}{I_{\text{end-groups}}} \cdot p_{PEE} \quad \#(2)$$

Where  $I$  represents the integration of NMR signals assigned to the EDOT copolymer backbone or end-groups, and  $p_{PEE}$  denotes the average proton number for one repeating unit without considering the proton of side groups. The copolymer of functionalized EDOT with EDOT (PEE) consists two alternative repeating units, i.e., EDOT (four protons) and functionalized EDOT substrates (three protons). Therefore, the value of  $p_{PEE}$  was determined to be 3.5.

The DP of PPEs was calculated according to the following equation:

---


$$DP_{PPE} = \frac{I_{ethylene\ dioxide}}{I_{end\ groups}} \cdot p_{PPE} \quad \#(3)$$

Where  $I$  represents the integration of NMR signals from the EDOT copolymer backbone, and  $p_{PPE}$  denotes the average proton number for one repeating unit without considering the proton of side groups. As shown in equation (3), the copolymer of functionalized EDOT with benzene (PPE) consists of two alternative repeating units, i.e., functionalized EDOT substrates (three protons) and benzene (no protons). Therefore, the value of  $p_{PPE}$  was determined to be 1.5.

In this way, the DP and  $M_n$  of the copolymers of EDOT-OH and EDOT-NH<sub>2</sub> with EDOT and benzene were determined by <sup>1</sup>H NMR end-group analysis. However, frustratingly, this end-group analysis method could not work for the copolymers of EDOT-COOH with EDOT and benzene, as the signal of the end-group could not be observed when they were dissolved in D<sub>2</sub>O/N<sub>2</sub>D<sub>4</sub>·D<sub>2</sub>O, plausibly due to the deuterium exchange. In contrast, the end group signal can be observed in DMSO-d<sub>6</sub>/D<sub>2</sub>O/N<sub>2</sub>D<sub>4</sub>·D<sub>2</sub>O (v/v/v = 100:5:1). However, only the EDOT-COOH copolymer of small molecular weight could be dissolved well in it, and no conclusive DP of carboxyl-functionalized EDOT polymers could be obtained. Instead, UV-vis spectra of the EDOT-COOH copolymers in N<sub>2</sub>H<sub>4</sub>·H<sub>2</sub>O were collected only to assess polymer formation and relative conjugation-length trends qualitatively.

### 3.3 Synthesis of PEE-OH.

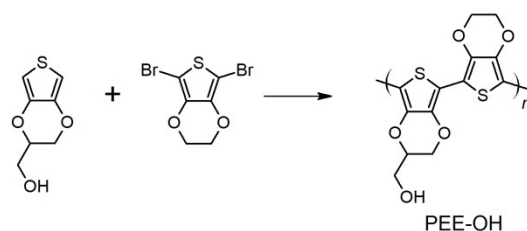

**Table S3** Summary of yield, optical property, molecular weight, and degree of polymerization for synthesis of PEE-OH with different phosphine ligands.

| Entry           | Pd Source                          | Solvent | Ligand | Temp. (°C) | Time | Yield (%) | $\lambda_{\max}$ (nm) | $M_n$ (Kg / mol) | DP |
|-----------------|------------------------------------|---------|--------|------------|------|-----------|-----------------------|------------------|----|
| 1 <sup>a</sup>  | Pd(OAc) <sub>2</sub>               | DMAc    | L1     | 120        | 1 h  | -         | -                     | -                | -  |
| 2 <sup>a</sup>  | Pd(OAc) <sub>2</sub>               | DMAc    | L2     | 120        | 1 h  | -         | -                     | -                | -  |
| 3 <sup>a</sup>  | Pd(OAc) <sub>2</sub>               | DMAc    | L3     | 120        | 1 h  | -         | -                     | -                | -  |
| 4 <sup>a</sup>  | Pd(OAc) <sub>2</sub>               | DMAc    | L4     | 120        | 1 h  | 55        | 557                   | 2.3              | 15 |
| 5 <sup>a</sup>  | Pd(OAc) <sub>2</sub>               | DMAc    | L5     | 120        | 1 h  | -         | -                     | -                | -  |
| 6 <sup>a</sup>  | Pd(OAc) <sub>2</sub>               | DMAc    | L6     | 120        | 1 h  | 39        | 555                   | 3.1              | 20 |
| 7 <sup>a</sup>  | Pd(OAc) <sub>2</sub>               | DMAc    | L7     | 120        | 1 h  | 85        | 574                   | 3.1              | 20 |
| 8 <sup>a</sup>  | Pd(OAc) <sub>2</sub>               | DMAc    | L8     | 120        | 1 h  | 71        | 548                   | 1.8              | 11 |
| 9 <sup>a</sup>  | Pd(OAc) <sub>2</sub>               | DMAc    | L9     | 120        | 1 h  | 75        | 557                   | 2.1              | 13 |
| 10 <sup>a</sup> | Pd(OAc) <sub>2</sub>               | DMAc    | L10    | 120        | 1 h  | 70        | 566                   | 3.4              | 22 |
| 11 <sup>a</sup> | Pd(OAc) <sub>2</sub>               | DMAc    | L11    | 120        | 1 h  | 88        | 578                   | 4.6              | 30 |
| 12 <sup>a</sup> | Pd(OAc) <sub>2</sub>               | DMAc    | L7     | 120        | 24 h | 86        | 566                   | 4.2              | 27 |
| 13 <sup>a</sup> | Pd(OAc) <sub>2</sub>               | DMAc    | L11    | 120        | 24 h | 91        | 577                   | 13.4             | 86 |
| 14 <sup>a</sup> | Pd(OAc) <sub>2</sub>               | DMAc    | N/A    | 60         | 1 h  | 89        | 562                   | 3.5              | 22 |
| 15 <sup>a</sup> | Pd(OAc) <sub>2</sub>               | DMAc    | N/A    | 120        | 1 h  | 95        | 564                   | 5.0              | 32 |
| 16 <sup>a</sup> | Pd(OAc) <sub>2</sub>               | DMAc    | N/A    | 120        | 24 h | 96        | 578                   | 12.0             | 77 |
| 17 <sup>b</sup> | Pd <sub>2</sub> (dba) <sub>3</sub> | Toluene | L6     | 110        | 1 h  | 31        | -                     | 3.7              | 23 |
| 18 <sup>b</sup> | Pd <sub>2</sub> (dba) <sub>3</sub> | Toluene | L6     | 110        | 48 h | 32        | -                     | 4.4              | 29 |
| 19 <sup>c</sup> | Pd <sub>2</sub> (dba) <sub>3</sub> | Toluene | L6     | 110        | 24 h | 78        | -                     | -                | -  |

<sup>a</sup> Reactions were performed on a 0.25 mmol scale in DMAc (0.125 M) using EDOT-OH (1 eq.), dibromo-EDOT (1 eq.), Pd source (10 mol %), phosphine ligand (20 mol %) and KPivO (2 eq.). <sup>b</sup> Performing in toluene (0.125 M) at 0.25 mmol scale using Pd source (2 mol%), phosphine ligand (4 mol %) and Cs<sub>2</sub>CO<sub>3</sub> (2 eq.). <sup>c</sup> Performed in toluene (0.125 M) at 0.25 mmol scale using Pd source (10 mol%), phosphine ligand (20 mol %) and KPivO (2 eq.).

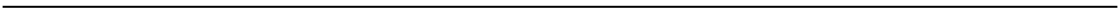

### 3.4 Synthesis of PPE-OH.

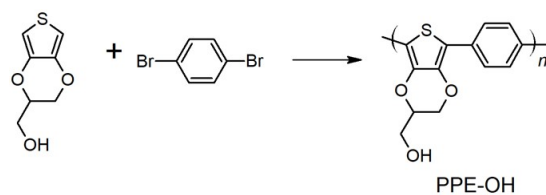

**Table S4** Summary of yield, optical property, molecular weight, and degree of polymerization for synthesis of PPE-OH with different phosphine ligands.

| entry           | Pd Source                          | Solvent | ligand        | Temp. (°C) | Time   | Yield (%) | $\lambda_{\max}$ (nm) | $M_n$ (Kg / mol) | DP  |
|-----------------|------------------------------------|---------|---------------|------------|--------|-----------|-----------------------|------------------|-----|
| 1 <sup>a</sup>  | Pd(OAc) <sub>2</sub>               | DMAc    | L1            | 120        | 1 h    | -         | -                     | -                | -   |
| 2 <sup>a</sup>  | Pd(OAc) <sub>2</sub>               | DMAc    | L2            | 120        | 1 h    | -         | -                     | -                | -   |
| 3 <sup>a</sup>  | Pd(OAc) <sub>2</sub>               | DMAc    | L3            | 120        | 1 h    | 53        | 461                   | 6.8              | 55  |
| 4 <sup>a</sup>  | Pd(OAc) <sub>2</sub>               | DMAc    | L4            | 120        | 1 h    | -         | -                     | -                | -   |
| 5 <sup>a</sup>  | Pd(OAc) <sub>2</sub>               | DMAc    | L5            | 120        | 1 h    | 23        | 464                   | 8.5              | 68  |
| 6 <sup>a</sup>  | Pd(OAc) <sub>2</sub>               | DMAc    | L6            | 120        | 1 h    | 30        | 458                   | 2.7              | 22  |
| 7 <sup>a</sup>  | Pd(OAc) <sub>2</sub>               | DMAc    | L7            | 120        | 30 min | 79        | 461                   | 15.0             | 121 |
| 8 <sup>a</sup>  | Pd(OAc) <sub>2</sub>               | DMAc    | L7            | 120        | 1 h    | 88        | 465                   | 48.9             | 396 |
| 9 <sup>a</sup>  | Pd(OAc) <sub>2</sub>               | DMAc    | L8            | 120        | 1 h    | 73        | 450                   | 2.5              | 20  |
| 10 <sup>a</sup> | Pd(OAc) <sub>2</sub>               | DMAc    | L9            | 120        | 1 h    | 78        | 453                   | 3.2              | 26  |
| 11 <sup>a</sup> | Pd(OAc) <sub>2</sub>               | DMAc    | L10           | 120        | 1 h    | 68        | 459                   | 3.8              | 31  |
| 12 <sup>a</sup> | Pd(OAc) <sub>2</sub>               | DMAc    | L11           | 120        | 30 min | 83        | 462                   | 21.8             | 176 |
| 13 <sup>a</sup> | Pd(OAc) <sub>2</sub>               | DMAc    | L11           | 120        | 1 h    | 92        | 467                   | 120.0            | 972 |
| 14 <sup>a</sup> | Pd(OAc) <sub>2</sub>               | DMAc    | N/A           | 60         | 1 h    | 84        | 459                   | 4.9              | 40  |
| 15 <sup>a</sup> | Pd(OAc) <sub>2</sub>               | DMAc    | N/A           | 120        | 30 min | 81        | 461                   | 11.2             | 90  |
| 16 <sup>a</sup> | Pd(OAc) <sub>2</sub>               | DMAc    | N/A           | 120        | 1 h    | 89        | 461                   | 13.3             | 108 |
| 17 <sup>a</sup> | Pd(OAc) <sub>2</sub>               | DMAc    | pyridine      | 120        | 1 h    | 81        | 451                   | 1.07             | 9   |
| 18 <sup>a</sup> | Pd(OAc) <sub>2</sub>               | DMAc    | 2,2-dipyridyl | 120        | 1 h    | -         | -                     | -                | -   |
| 19 <sup>b</sup> | Pd <sub>2</sub> (dba) <sub>3</sub> | Toluene | L6            | 110        | 1 h    | 83        | -                     | 1.7              | 14  |
| 20 <sup>b</sup> | Pd <sub>2</sub> (dba) <sub>3</sub> | Toluene | L6            | 110        | 48 h   | 86        | -                     | 2.1              | 17  |
| 21 <sup>c</sup> | Pd <sub>2</sub> (dba) <sub>3</sub> | Toluene | L6            | 110        | 24 h   | 98        | -                     | -                | -   |

<sup>a</sup> Reactions were performed on a 0.25 mmol scale in DMAc (0.125 M) using EDOT-OH (1 eq.), dibromo-EDOT (1 eq.), Pd source (10 mol %), phosphine ligand (20 mol %) and KPivO (2 eq.). <sup>b</sup> Performing in toluene (0.125 M) at 0.25 mmol scale using Pd source (2 mol%), phosphine ligand (4 mol %) and Cs<sub>2</sub>CO<sub>3</sub>

(2 eq.). <sup>c</sup> Performed in toluene (0.125 M) at 0.25 mmol scale using Pd source (10 mol%), phosphine ligand (20 mol %) and KPivO (2 eq.).

### 3.5 Synthesis of PEE-COOH.

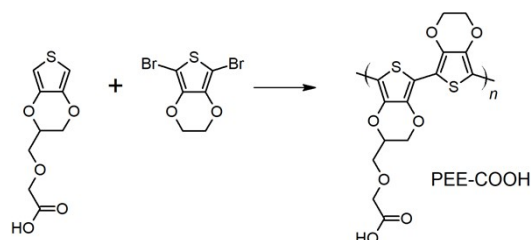

**Table S5** Summary of yield and optical property for synthesis of PEE-COOH with different phosphine ligands <sup>a</sup>.

| entry | ligand | Yield (%) | $\lambda_{\max}$ (nm) |
|-------|--------|-----------|-----------------------|
| 1     | L1     | -         | -                     |
| 2     | L2     | -         | -                     |
| 3     | L3     | -         | -                     |
| 4     | L4     | 23        | 593                   |
| 5     | L5     | -         | -                     |
| 6     | L6     | -         | -                     |
| 7     | L7     | -         | -                     |
| 8     | L8     | 44        | 592                   |
| 9     | L9     | 49        | 597                   |
| 10    | L10    | 48        | 601                   |
| 11    | L11    | -         | -                     |

<sup>a</sup> Reaction conditions were performed on a 0.25 mmol scale in DMAc (0.125 M) using EDOT-COOH (1 eq.), dibromo-EDOT (1 eq.), Pd(OAc)<sub>2</sub> (10 mol %), phosphine ligand (20 mol %) and KPivO (2 eq.) at 120 °C for 1 hr.

---

### 3.6 Synthesis of PPE-COOH.

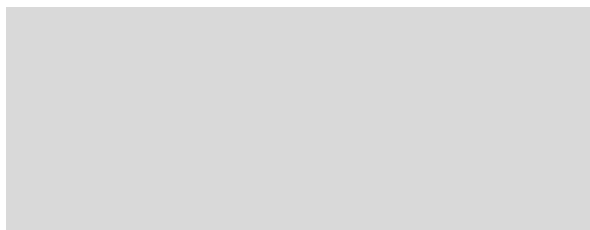

**Table S6** Summary of yield and optical property for synthesis of PPE-COOH with different phosphine ligands <sup>a</sup>.

| entry | ligand | Yield (%) | $\lambda_{\text{max}}$ (nm) |
|-------|--------|-----------|-----------------------------|
| 1     | L1     | -         | -                           |
| 2     | L2     | -         | -                           |
| 3     | L3     | -         | -                           |
| 4     | L4     | 20        | 386                         |
| 5     | L5     | -         | -                           |
| 6     | L6     | -         | -                           |
| 7     | L7     | -         | -                           |
| 8     | L8     | 52        | 415                         |
| 9     | L9     | 44        | 421                         |
| 10    | L10    | 31        | 412                         |
| 11    | L11    | -         | -                           |

<sup>a</sup> Reactions were performed on a 0.25 mmol scale in DMAc (0.125 M) using EDOT-COOH (1 eq.), dibromobenzene (1 eq.), Pd(OAc)<sub>2</sub> (10 mol %), phosphine ligand (20 mol %) and KPivO (2 eq.) at 120 °C for 1 hr.

### 3.7 Synthesis of PEE-NH<sub>2</sub>.

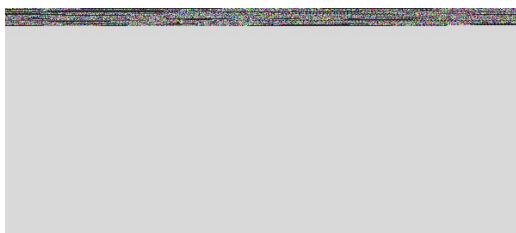

**Table S7** Summary of yield, optical property, molecular weight, and degree of polymerization for synthesis of PEE-NH<sub>2</sub> with different phosphine ligands <sup>a</sup>.

| entry | ligand | Temp. (°C) | Time (h) | Yield (%) | $\lambda_{\max}$ (nm) | $M_n$ (Kg / mol) | DP |
|-------|--------|------------|----------|-----------|-----------------------|------------------|----|
| 1     | L1     | 120        | 6        | -         | -                     | -                | -  |
| 2     | L2     | 120        | 6        | -         | -                     | -                | -  |
| 3     | L3     | 120        | 6        | -         | -                     | -                | -  |
| 4     | L4     | 120        | 6        | 61        | 536                   | 0.9              | 6  |
| 5     | L5     | 120        | 6        | 41        | 536                   | 1.0              | 6  |
| 6     | L6     | 120        | 6        | 27        | 532                   | 0.8              | 5  |
| 7     | L7     | 120        | 6        | -         | -                     | -                | -  |
| 8     | L8     | 120        | 6        | 52        | 534                   | 0.9              | 6  |
| 9     | L9     | 120        | 6        | 82        | 546                   | 1.9              | 12 |
| 10    | L10    | 120        | 6        | 49        | 543                   | 1.6              | 10 |
| 11    | L11    | 120        | 6        | -         | -                     | -                | -  |
| 12    | N/A    | 60         | 6        | -         | -                     | -                | -  |
| 13    | N/A    | 120        | 6        | 23        | 533                   | 0.5              | 3  |

<sup>a</sup> Reactions were performed on a 0.25 mmol scale in DMAc (0.125 M) using EDOT-NH<sub>2</sub> (1 eq.), dibromo-EDOT (1 eq.), Pd(OAc)<sub>2</sub> (10 mol %), phosphine ligand (20 mol %), and KPivO (2 eq.) at 120 °C for 6 hr.

### 3.8 Synthesis of PPE-NH<sub>2</sub>.

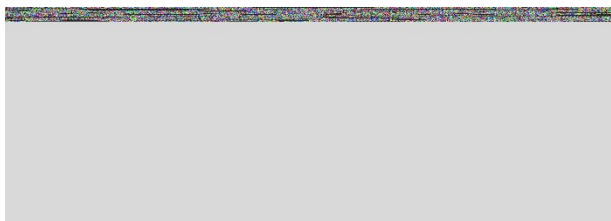

**Table S8** Summary of yield, optical property, molecular weight, and degree of polymerization for synthesis of PPE-NH<sub>2</sub> with different phosphine ligands <sup>a</sup>

| entry | ligand | Temp. (°C) | Time (h) | Yield (%) | $\lambda_{\max}$ (nm) | M <sub>n</sub> (Kg / mol) | DP  |
|-------|--------|------------|----------|-----------|-----------------------|---------------------------|-----|
| 1     | L1     | 120        | 6        | -         | -                     | -                         | -   |
| 2     | L2     | 120        | 6        | -         | -                     | -                         | -   |
| 3     | L3     | 120        | 1        | -         | -                     | -                         | -   |
| 4     | L3     | 120        | 3        | 23        | 440                   | 3.2                       | 26  |
| 5     | L3     | 120        | 6        | 66        | 452                   | 6.7                       | 53  |
| 6     | L4     | 120        | 3        | -         | -                     | -                         | -   |
| 7     | L4     | 120        | 6        | 46        | 450                   | 6.8                       | 55  |
| 8     | L5     | 120        | 1        | 23        | 443                   | 2.1                       | 17  |
| 9     | L5     | 120        | 3        | 44        | 449                   | 2.4                       | 19  |
| 10    | L5     | 120        | 6        | 67        | 451                   | 4.6                       | 37  |
| 11    | L6     | 120        | 1        | -         | -                     | -                         | -   |
| 12    | L6     | 120        | 3        | 24        | 453                   | 3.8                       | 31  |
| 13    | L6     | 120        | 6        | 43        | 456                   | 4.4                       | 53  |
| 14    | L7     | 120        | 6        | -         | -                     | -                         | -   |
| 15    | L8     | 120        | 1        | 34        | 451                   | 3.0                       | 23  |
| 16    | L8     | 120        | 3        | 61        | 460                   | 16.1                      | 130 |
| 17    | L8     | 120        | 6        | 73        | 465                   | 87.9                      | 711 |
| 18    | L9     | 120        | 1        | 29        | 451                   | 3.8                       | 31  |
| 19    | L9     | 120        | 3        | 48        | 458                   | 5.2                       | 42  |
| 20    | L9     | 120        | 6        | 67        | 464                   | 31.2                      | 253 |
| 21    | L10    | 120        | 1        | -         | -                     | -                         | -   |
| 22    | L10    | 120        | 3        | 29        | 444                   | 4.6                       | 37  |

|    |     |     |   |    |     |     |    |
|----|-----|-----|---|----|-----|-----|----|
| 23 | L10 | 120 | 6 | 37 | 445 | 4.8 | 39 |
| 24 | L11 | 120 | 1 | -  | -   | -   | -  |
| 25 | L11 | 120 | 3 | 26 | 441 | 1.1 | 8  |
| 26 | L11 | 120 | 6 | 55 | 452 | 5.6 | 67 |
| 27 | N/A | 60  | 6 | -  | -   | -   | -  |
| 28 | N/A | 120 | 1 | -  | -   | -   | -  |
| 29 | N/A | 120 | 3 | 28 | 441 | 1.2 | 10 |
| 30 | N/A | 120 | 6 | 41 | 443 | 2.4 | 20 |

<sup>a</sup> Reactions were performed on a 0.25 mmol scale using EDOT-NH<sub>2</sub> (1 eq.), dibromobenzene (1 eq.), Pd(OAc)<sub>2</sub> (10 mol %), phosphine ligand (20 mol %), and KPivO (2 eq.) in DMAc (0.125 M) at 120 °C.

## 4. Small Molecule Model Reaction

### 4.1 General Methods of Direct Arylation of EDOT-NH<sub>2</sub> with bromoarenes

The small molecule model for the direct arylation of EDOT-NH<sub>2</sub> with bromoarene was conducted under conditions similar to those used in the polymerization conditions. In a typical procedure, a Schlenk tube was charged with EDOT-NH<sub>2</sub> (1 eq.), bromoarene (2.1 eq.), palladium acetate (10 mol %), potassium pivalate (2 eq.), phosphine ligand (20 mol %) or performed ligandless, N,N-dimethylacetamide (DMAc) (0.125 M) and a magnetic stir bar. All reagents were introduced in a glovebox at a 0.25 mmol scale. The mixture was heated in an oil bath at the desired temperature with vigorous stirring, and the monomer conversion was monitored by <sup>1</sup>H NMR. For NMR analysis, 10 μL aliquot from reaction mixture was taken and immediately diluted into 0.5 mL DMSO-d<sub>6</sub>. These samples were stored at -20 °C until prior to the NMR measurement.

## 4.2 Small Molecular Model for Direct Arylation of EDOT-NH<sub>2</sub>

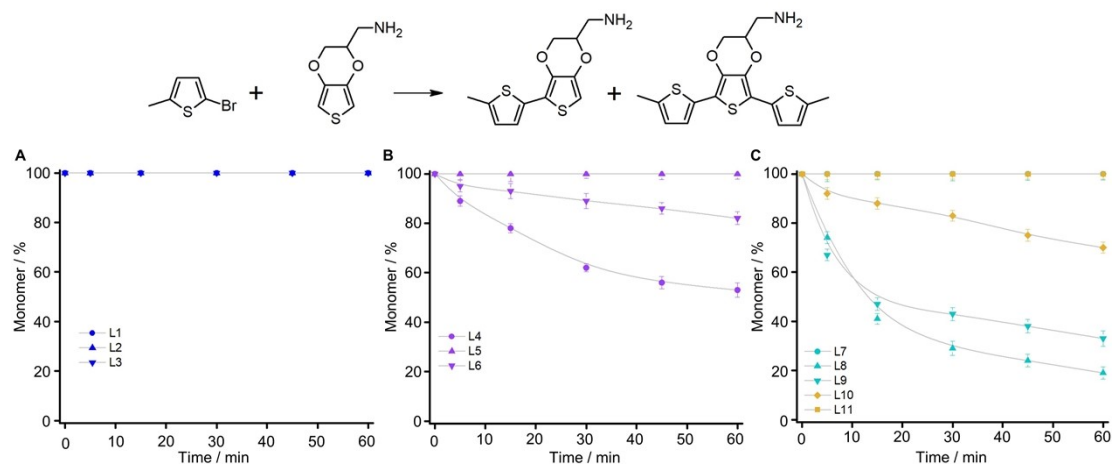

**Figure S2** Consumption of EDOT-NH<sub>2</sub> monitored by <sup>1</sup>H NMR for the direct arylation of 2-bromo-5-methylthiophene (0.2625 M) with EDOT-NH<sub>2</sub> (0.125 M), KPivO (0.2625 M) and Pd(OAc)<sub>2</sub> (10 mol %) under various ligand conditions. (A) Phosphine ligands P1-P3 (20 mol %) at 120 °C, (B) Phosphine ligands P4-P6 (20 mol %) at 120 °C, (C) Phosphine ligands P7-P11 (20 mol %) at 120 °C.

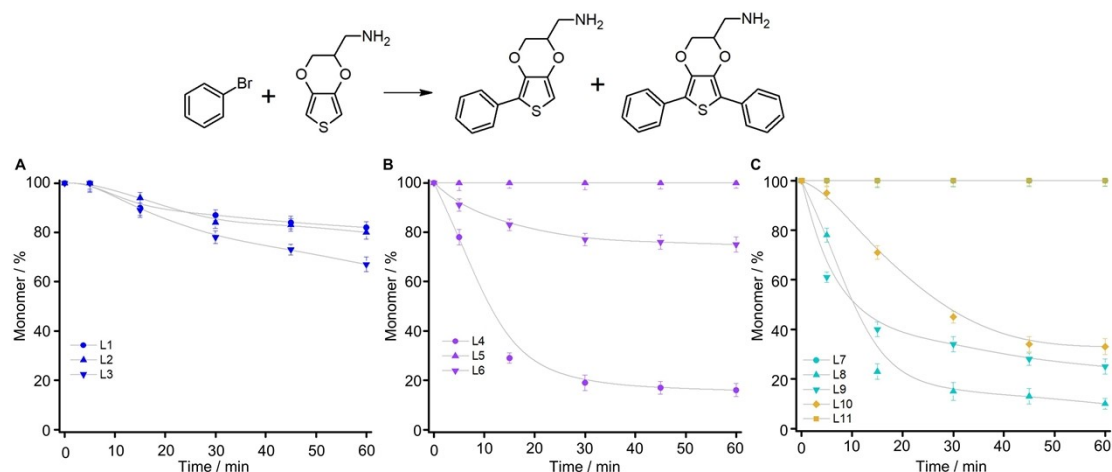

**Figure S3** Consumption of EDOT-NH<sub>2</sub> monitored by <sup>1</sup>H NMR for the direct arylation of bromobenzene (0.2625 M) with EDOT-NH<sub>2</sub> (0.125 M), KPivO (0.2625 M) and Pd(OAc)<sub>2</sub> (10 mol %) under various ligand conditions. (A) Phosphine ligands P1-P3 (20 mol %) at 120 °C, (B) Phosphine ligands P4-P6 (20 mol %) at 120 °C, (C) Phosphine ligands P7-P11 (20 mol %) at 120 °C.

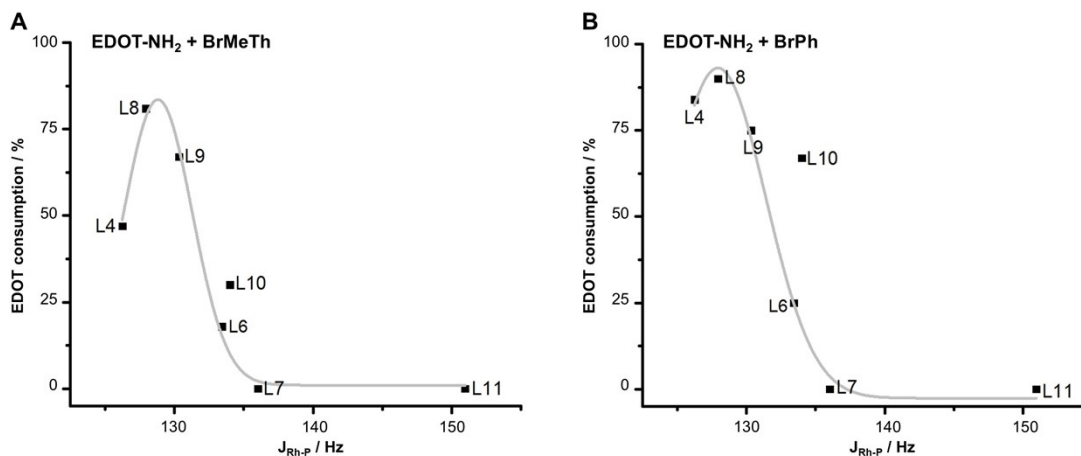

**Figure S4** The plot for the consumption of EDOT as a function of aryl-phosphine ligands' EDS (L4-L11).

## 5. Computational Studies

### 5.1 Computational methods.

All calculations were performed with the Gaussian 09 package<sup>7</sup>. Geometry optimizations and frequency calculations were carried out via density functional theory (DFT) at the M06L/ (SDD basis-set for Pd and 6-31G(d) for all other atoms)<sup>8,9</sup>. Single point energy calculations were performed by M06-L/(SDD basis-set for Pd and 6-311++G(d,p) for all other atoms) and corrected by Gibbs free energy corrections to simulate the whole concerted metalation-deprotonation process. PCM solvent compensation (DMAc,  $\epsilon=37.781$ ) was assessed throughout the study. The intrinsic reaction coordinates (IRC) were followed to verify the connections between reactants and products for all transition states, and subsequently, the geometry optimization was carried out until the corresponding minima were reached.

The electrostatic potential (ESP) characteristic parameter of pristine EDOT was calculated using Multiwfn 3.7(dev) programs with the electronic wave function information. The corresponding ESP distribution was plotted by VMD<sup>10</sup>. The geometry optimization of selected phosphine ligands was calculated using the DFT at M06L/6-31G(d) level.

Moreover, the Tolman cone angle  $\theta$  of those ligands was calculated by Solid-G

software with a metal-P distance of 2.28 Å<sup>11, 12</sup>. The Tolman cone angle  $\theta$  of the metal-L1 complex was visualized in the schematic presentation using VMD and Multiwfn 3.7(dev) programs, as embedded in Figure 3C. The frontier orbitals were calculated using Gaussian 09 programs with electronic wave function information and visualized through the VMD and Multiwfn 3.7(dev) programs.

The Wiberg bond order (WBO) was calculated for the optimized structure of reaction intermediates using the natural bond order (NBO). The atomic orbital pair contributions for the optimized structure of reaction intermediates were further calculated using the natural atomic orbital (NAO) analysis. Both were calculated by using the Gaussian input file of a single point task with *pop=full*, *NBORead* keyword in the route section, and *DMNAO NAOMO* keyword added between \$NBO ... \$END field after the molecular geometry section. The functional and basis sets employed in the optimization were identical to those previously utilized. The contributions from NAO pairs were obtained from Multiwfn 3.7(dev) program.

## 5.2 Computational results.

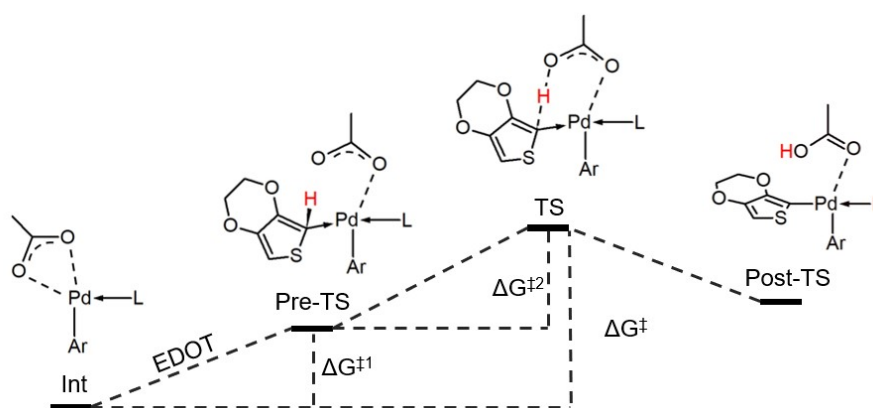

**Figure S5** The typical concerted metalation-deprotonation (CMD) pathway for EDOT activation, where a prior intermediate (Pre-TS) occurs ahead of the transition state (TS).

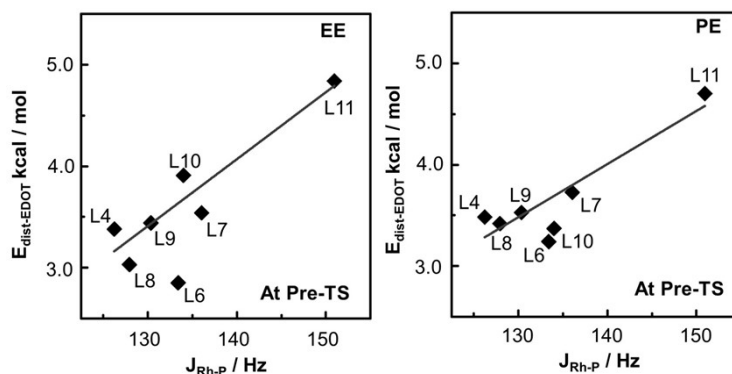

**Figure S6** The plots of the distortion energies (kcal/mol) of EDOT at Pre-TS as a function of  $J_{Rh-P}$  for the Pre-TS involving **(Left)** EDOT/**(Right)** benzene (oxidative addition substrate) and EDOT (arylation substrate). EE/PE indicates the CMD processes of coupling between EDOT/benzene (oxidative addition substrate) and EDOT (arylation substrate).

**Table S9** Summary of the energies ( $\Delta E$ ) and free energies ( $\Delta G$ ) of the potential energy surface 1 from (Int + EDOT) to Pre-TS<sub>EE</sub> and the potential energy surface 2 from Pre-TS<sub>EE</sub> to TS<sub>EE</sub> shown in Figure S1 with different phosphine ligands, and the distortion energies ( $E_{dist}$ ) of PdL and ArH at Pre-TS<sub>EE</sub> with different phosphine ligands. All values are given in Kcal/mol.

| Ligand | $\Delta E^{\ddagger 1}$ | $\Delta G^{\ddagger 1}$ | $\Delta E^{\ddagger 2}$ | $\Delta G^{\ddagger 2}$ | $E_{dist}(PdL)$ | $E_{dist}(ArH)$ |
|--------|-------------------------|-------------------------|-------------------------|-------------------------|-----------------|-----------------|
| L1     | -5.59                   | 9.03                    | 17.89                   | 17.05                   | 10.93           | 3.47            |
| L2     | -8.27                   | 11.09                   | 18.15                   | 13.71                   | 8.63            | 2.98            |
| L3     | -10.25                  | 3.94                    | 20.81                   | 17.69                   | 8.32            | 2.97            |
| L4     | -7.01                   | 4.63                    | 19.72                   | 17.01                   | 7.49            | 3.39            |
| L5     | -9.15                   | 9.35                    | 17.33                   | 14.01                   | 11.87           | 3.71            |
| L6     | -9.47                   | 6.97                    | 17.32                   | 12.48                   | 9.41            | 2.85            |
| L7     | -9.17                   | 7.22                    | 17.56                   | 14.32                   | 9.80            | 3.54            |
| L8     | -9.67                   | 5.23                    | 15.91                   | 15.89                   | 8.29            | 3.44            |
| L9     | -11.71                  | 5.67                    | 16.72                   | 14.80                   | 7.79            | 3.04            |
| L10    | -12.03                  | 3.91                    | 15.86                   | 13.20                   | 7.98            | 3.91            |
| L11    | -12.03                  | 5.16                    | 14.41                   | 10.34                   | 7.50            | 4.85            |
| DMAc   | -14.69                  | 2.66                    | 14.51                   | 8.88                    | 16.80           | 8.68            |

**Table S10** Summary of the energies ( $\Delta E$ ) and free energies ( $\Delta G$ ) of the potential energy surface from (Int + EDOT) to  $TS_{EE}$  shown in Figure S1 with different phosphine ligands and the distortion-interaction energies for  $TS_{EE}$  with different phosphine ligands. All values are given in Kcal/mol.

| Ligand | $\Delta E^\ddagger$ | $\Delta G^\ddagger$ | $E_{\text{dist}}(\text{PdL})$ | $E_{\text{dist}}(\text{ArH})$ | $E_{\text{dist}}(\text{total})$ | $E_{\text{int}}$ |
|--------|---------------------|---------------------|-------------------------------|-------------------------------|---------------------------------|------------------|
| L1     | 12.30               | 26.08               | 19.77                         | 45.95                         | 65.73                           | 53.43            |
| L2     | 9.88                | 24.80               | 15.29                         | 50.11                         | 65.40                           | 55.52            |
| L3     | 11.43               | 21.63               | 16.19                         | 50.64                         | 66.83                           | 55.40            |
| L4     | 9.47                | 21.63               | 15.22                         | 49.63                         | 64.85                           | 55.38            |
| L5     | 10.32               | 23.36               | 18.04                         | 47.86                         | 65.90                           | 55.58            |
| L6     | 8.17                | 19.45               | 16.23                         | 45.95                         | 62.18                           | 54.01            |
| L7     | 8.09                | 21.54               | 15.34                         | 48.63                         | 63.98                           | 55.89            |
| L8     | 6.73                | 20.03               | 14.51                         | 38.77                         | 53.27                           | 46.54            |
| L9     | 7.05                | 21.56               | 15.50                         | 39.27                         | 54.77                           | 47.72            |
| L10    | 4.15                | 17.10               | 15.06                         | 35.52                         | 54.58                           | 50.43            |
| L11    | 2.38                | 15.50               | 14.26                         | 38.00                         | 52.25                           | 49.87            |
| DMAc   | -0.18               | 7.79                | 19.47                         | 36.45                         | 55.92                           | 58.00            |

**Table S11** Summary of the energies ( $\Delta E$ ) and free energies ( $\Delta G$ ) of the potential energy surface 1 from (Int + EDOT) to Pre- $TS_{PE}$  and the potential energy surface 2 from Pre- $TS_{PE}$  to  $TS_{PE}$  shown in Figure S1 with different phosphine ligands, and the distortion energies ( $E_{\text{dist}}$ ) of PdL and ArH at Pre- $TS_{PE}$  with different phosphine ligands. All values are given in Kcal/mol.

| Ligand | $\Delta E^{\ddagger 1}$ | $\Delta G^{\ddagger 1}$ | $\Delta E^{\ddagger 2}$ | $\Delta G^{\ddagger 2}$ | $E_{\text{dist}}(\text{PdL})$ | $E_{\text{dist}}(\text{ArH})$ |
|--------|-------------------------|-------------------------|-------------------------|-------------------------|-------------------------------|-------------------------------|
| L1     | -4.07                   | 8.28                    | 15.47                   | 15.47                   | 12.86                         | 2.79                          |
| L2     | -5.36                   | 6.36                    | 17.52                   | 17.52                   | 11.84                         | 2.66                          |
| L3     | -8.13                   | 7.33                    | 15.70                   | 15.70                   | 9.05                          | 2.77                          |
| L4     | -9.21                   | 5.36                    | 18.35                   | 14.08                   | 8.55                          | 3.48                          |
| L5     | -9.65                   | 9.25                    | 14.42                   | 14.42                   | 9.71                          | 3.50                          |
| L6     | -9.09                   | 10.86                   | 14.43                   | 14.43                   | 9.96                          | 3.24                          |
| L7     | -9.40                   | 7.26                    | 17.63                   | 11.22                   | 9.42                          | 3.73                          |
| L8     | -9.81                   | 6.33                    | 18.13                   | 12.45                   | 8.30                          | 3.42                          |
| L9     | -10.33                  | 6.07                    | 18.10                   | 13.41                   | 7.94                          | 3.53                          |
| L10    | -10.52                  | -1.82                   | 16.52                   | 13.47                   | 8.39                          | 3.37                          |
| L11    | -20.21                  | -3.81                   | 17.34                   | 15.36                   | 9.38                          | 4.70                          |
| DMAc   | -12.71                  | 2.66                    | 13.69                   | 11.01                   | 15.69                         | 7.24                          |

**Table S12** Summary of the energies ( $\Delta E$ ) and free energies ( $\Delta G$ ) of the potential energy surface from (Int + EDOT) to  $TS_{PE}$  shown in Figure S1 with different phosphine ligands and the distortion-interaction energies for  $TS_{PE}$  with different phosphine ligands. All values are given in Kcal/mol.

| Ligand | $\Delta E^\ddagger$ | $\Delta G^\ddagger$ | $E_{dist}(PdL)$ | $E_{dist}(ArH)$ | $E_{dist}(total)$ | $E_{int}$ |
|--------|---------------------|---------------------|-----------------|-----------------|-------------------|-----------|
| L1     | 13.00               | 23.75               | 19.36           | 45.52           | 64.88             | 51.88     |
| L2     | 12.09               | 23.88               | 17.32           | 47.20           | 64.52             | 52.43     |
| L3     | 9.71                | 23.04               | 14.88           | 43.89           | 58.77             | 49.06     |
| L4     | 9.14                | 19.43               | 14.82           | 41.20           | 56.02             | 46.88     |
| L5     | 7.31                | 23.67               | 13.97           | 39.12           | 53.08             | 45.77     |
| L6     | 8.81                | 25.59               | 14.77           | 37.42           | 52.12             | 43.37     |
| L7     | 8.22                | 18.47               | 15.19           | 39.34           | 54.53             | 46.31     |
| L8     | 8.42                | 18.78               | 14.92           | 43.05           | 57.97             | 49.65     |
| L9     | 7.78                | 19.47               | 14.80           | 42.98           | 57.77             | 50.00     |
| L10    | 6.00                | 11.65               | 15.54           | 40.33           | 55.87             | 49.87     |
| L11    | -2.87               | 11.55               | 15.67           | 37.63           | 53.30             | 46.64     |
| DMAc   | 0.98                | 13.67               | 18.79           | 34.90           | 53.69             | 52.71     |

**Table S13** WBOs of Pd-L, Pd-C, and C-H bonds of different intermediates in the CMD process for coupling between EDOT (oxidative addition substrate) and EDOT (arylation substrate).

| Ligand | Pre-TS     |            |           | TS          |             |           | Post-Ts    |            |           |
|--------|------------|------------|-----------|-------------|-------------|-----------|------------|------------|-----------|
|        | WBO (Pd-L) | WBO (Pd-C) | WBO (C-H) | WBO (Pd -L) | WBO (Pd -C) | WBO (C-H) | WBO (Pd-L) | WBO (Pd-C) | WBO (C-H) |
| L1     | 0.611      | 0.220      | 0.844     | 0.528       | 0.430       | 0.302     | 0.494      | 0.539      | 0.079     |
| L2     | 0.637      | 0.205      | 0.853     | 0.560       | 0.415       | 0.281     | 0.528      | 0.521      | 0.081     |
| L3     | 0.618      | 0.208      | 0.843     | 0.555       | 0.418       | 0.281     | 0.497      | 0.529      | 0.048     |
| L4     | 0.619      | 0.235      | 0.854     | 0.550       | 0.428       | 0.284     | 0.517      | 0.582      | 0.036     |
| L5     | 0.581      | 0.250      | 0.829     | 0.522       | 0.445       | 0.293     | 0.483      | 0.573      | 0.063     |
| L6     | 0.575      | 0.219      | 0.838     | 0.495       | 0.431       | 0.318     | 0.451      | 0.552      | 0.069     |
| L7     | 0.594      | 0.250      | 0.834     | 0.535       | 0.442       | 0.291     | 0.479      | 0.566      | 0.043     |
| L8     | 0.615      | 0.236      | 0.856     | 0.551       | 0.410       | 0.362     | 0.513      | 0.590      | 0.034     |
| L9     | 0.616      | 0.220      | 0.859     | 0.543       | 0.417       | 0.369     | 0.518      | 0.585      | 0.033     |
| L10    | 0.610      | 0.245      | 0.860     | 0.539       | 0.428       | 0.364     | 0.507      | 0.541      | 0.087     |
| L11    | 0.574      | 0.286      | 0.851     | 0.507       | 0.454       | 0.380     | 0.467      | 0.617      | 0.032     |
| DMAc   | 0.283      | 0.448      | 0.847     | 0.264       | 0.550       | 0.394     | 0.248      | 0.688      | 0.044     |

**Table S14** WBOs of Pd-L, Pd-C, and C-H bonds of different intermediates in the CMD process for coupling between benzene (oxidative addition substrate) and EDOT (arylation substrate).

| Ligand | Pre-TS        |               |              | TS            |               |              | Post-Ts       |               |              |
|--------|---------------|---------------|--------------|---------------|---------------|--------------|---------------|---------------|--------------|
|        | WBO<br>(Pd-L) | WBO<br>(Pd-C) | WBO<br>(C-H) | WBO<br>(Pd-L) | WBO<br>(Pd-C) | WBO<br>(C-H) | WBO<br>(Pd-L) | WBO<br>(Pd-C) | WBO<br>(C-H) |
| L1     | 0.589         | 0.203         | 0.840        | 0.521         | 0.404         | 0.305        | 0.476         | 0.525         | 0.052        |
| L2     | 0.613         | 0.202         | 0.846        | 0.554         | 0.392         | 0.296        | 0.523         | 0.510         | 0.075        |
| L3     | 0.595         | 0.208         | 0.834        | 0.539         | 0.386         | 0.323        | 0.500         | 0.514         | 0.054        |
| L4     | 0.602         | 0.231         | 0.858        | 0.550         | 0.392         | 0.339        | 0.527         | 0.556         | 0.036        |
| L5     | 0.583         | 0.231         | 0.854        | 0.536         | 0.399         | 0.360        | 0.507         | 0.569         | 0.039        |
| L6     | 0.567         | 0.219         | 0.858        | 0.511         | 0.373         | 0.374        | 0.477         | 0.554         | 0.045        |
| L7     | 0.589         | 0.240         | 0.858        | 0.532         | 0.399         | 0.291        | 0.505         | 0.572         | 0.036        |
| L8     | 0.603         | 0.229         | 0.857        | 0.548         | 0.399         | 0.362        | 0.526         | 0.557         | 0.036        |
| L9     | 0.598         | 0.233         | 0.858        | 0.545         | 0.398         | 0.369        | 0.520         | 0.561         | 0.037        |
| L10    | 0.594         | 0.227         | 0.856        | 0.544         | 0.404         | 0.364        | 0.514         | 0.524         | 0.082        |
| L11    | 0.572         | 0.274         | 0.855        | 0.524         | 0.419         | 0.380        | 0.488         | 0.585         | 0.033        |
| DMAc   | 0.266         | 0.392         | 0.852        | 0.245         | 0.506         | 0.405        | 0.234         | 0.656         | 0.048        |

### 5.3 Atomic orbital pair contributions (AOPC) for reaction intermediates by NAO analysis.

**Table S15** The AOPC for WBOs of Pd-C bond between palladium and arylation substrate in Pre-TS for coupling between EDOT (oxidative addition substrate) and EDOT (arylation substrate).

| State                            | 5s-2p  | 4d-2p  | Total  |
|----------------------------------|--------|--------|--------|
| <b>Pre-TS<sub>EE</sub>(L1)</b>   | -      | 0.0986 | 0.2195 |
| <b>Pre-TS<sub>EE</sub>(L2)</b>   | -      | 0.0867 | 0.2051 |
| <b>Pre-TS<sub>EE</sub>(L3)</b>   | -      | 0.0904 | 0.2079 |
| <b>Pre-TS<sub>EE</sub>(L4)</b>   | -      | 0.0974 | 0.2350 |
| <b>Pre-TS<sub>EE</sub>(L5)</b>   | -      | 0.1069 | 0.2496 |
| <b>Pre-TS<sub>EE</sub>(L6)</b>   | -      | 0.0952 | 0.2187 |
| <b>Pre-TS<sub>EE</sub>(L7)</b>   | -      | 0.1058 | 0.2497 |
| <b>Pre-TS<sub>EE</sub>(L8)</b>   | -      | 0.0919 | 0.2196 |
| <b>Pre-TS<sub>EE</sub>(L9)</b>   | -      | 0.1004 | 0.2366 |
| <b>Pre-TS<sub>EE</sub>(L10)</b>  | -      | 0.1019 | 0.2445 |
| <b>Pre-TS<sub>EE</sub>(L11)</b>  | 0.0535 | 0.1256 | 0.2863 |
| <b>Pre-TS<sub>EE</sub>(DMAc)</b> | 0.0727 | 0.2434 | 0.4481 |

**Table S16** The AOPC for WBOs of Pd-C bond between palladium and arylation substrate in Pre-TS for coupling between benzene (oxidative addition substrate) and EDOT (arylation substrate).

| State                            | 5s-2p  | 4d-2p  | Total  |
|----------------------------------|--------|--------|--------|
| <b>Pre-TS<sub>PE</sub>(L1)</b>   | -      | 0.0889 | 0.2033 |
| <b>Pre-TS<sub>PE</sub>(L2)</b>   | -      | 0.0858 | 0.2027 |
| <b>Pre-TS<sub>PE</sub>(L3)</b>   | -      | 0.0885 | 0.2078 |
| <b>Pre-TS<sub>PE</sub>(L4)</b>   | -      | 0.0893 | 0.2306 |
| <b>Pre-TS<sub>PE</sub>(L5)</b>   | -      | 0.0876 | 0.2314 |
| <b>Pre-TS<sub>PE</sub>(L6)</b>   | -      | 0.0862 | 0.2189 |
| <b>Pre-TS<sub>PE</sub>(L7)</b>   | -      | 0.0920 | 0.2400 |
| <b>Pre-TS<sub>PE</sub>(L8)</b>   | -      | 0.0882 | 0.2289 |
| <b>Pre-TS<sub>PE</sub>(L9)</b>   | -      | 0.0903 | 0.2325 |
| <b>Pre-TS<sub>PE</sub>(L10)</b>  | -      | 0.0911 | 0.2268 |
| <b>Pre-TS<sub>PE</sub>(L11)</b>  | 0.0557 | 0.1088 | 0.2740 |
| <b>Pre-TS<sub>PE</sub>(DMAc)</b> | 0.0609 | 0.2068 | 0.3921 |

**Table S17** The AOPC for WBOs of Pd-L bond between palladium and phosphine ligand in Pre-TS for coupling between EDOT (oxidative addition substrate) and EDOT (arylation substrate).

| State                           | 5s-3s  | 5s-3p  | 5p-3s  | 4d-3s  | 4d-3p  | Total  |
|---------------------------------|--------|--------|--------|--------|--------|--------|
| <b>Pre-TS<sub>EE</sub>(L1)</b>  | 0.0673 | 0.1315 | 0.0682 | 0.0513 | 0.2300 | 0.6111 |
| <b>Pre-TS<sub>EE</sub>(L2)</b>  | 0.0678 | 0.1355 | 0.0577 | 0.0634 | 0.2505 | 0.6368 |
| <b>Pre-TS<sub>EE</sub>(L3)</b>  | 0.0654 | 0.1342 | 0.0550 | 0.0593 | 0.2481 | 0.6181 |
| <b>Pre-TS<sub>EE</sub>(L4)</b>  | 0.0676 | 0.1268 | 0.0596 | 0.0644 | 0.2303 | 0.6185 |
| <b>Pre-TS<sub>EE</sub>(L5)</b>  | 0.0670 | 0.1110 | 0.0683 | 0.0577 | 0.2074 | 0.5809 |
| <b>Pre-TS<sub>EE</sub>(L6)</b>  | 0.0661 | 0.1106 | 0.0570 | 0.0646 | 0.2166 | 0.5748 |
| <b>Pre-TS<sub>EE</sub>(L7)</b>  | 0.0674 | 0.1150 | 0.0617 | 0.0633 | 0.2175 | 0.5943 |
| <b>Pre-TS<sub>EE</sub>(L8)</b>  | 0.0672 | 0.1235 | 0.0582 | 0.0668 | 0.2325 | 0.6159 |
| <b>Pre-TS<sub>EE</sub>(L9)</b>  | 0.0679 | 0.1211 | 0.0630 | 0.0646 | 0.2275 | 0.6154 |
| <b>Pre-TS<sub>EE</sub>(L10)</b> | 0.0667 | 0.1153 | 0.0626 | 0.0651 | 0.2288 | 0.6100 |
| <b>Pre-TS<sub>EE</sub>(L11)</b> | 0.0662 | 0.1034 | 0.0681 | 0.0594 | 0.2033 | 0.5738 |

|                                  |                               |        |
|----------------------------------|-------------------------------|--------|
| <b>Pre-TS<sub>EE</sub>(DMAc)</b> | 5s-2p (0.0520)/4d-2p (0.0786) | 0.2826 |
|----------------------------------|-------------------------------|--------|

**Table S18** The AOPC for WBOs of Pd-L bond between palladium and phosphine ligand in Pre-TS for coupling between benzene (oxidative addition substrate) and EDOT (arylation substrate).

| State                            | 6p-3s  | 5s-3s                        | 5s-3p  | 5p-3s  | 4d-3s  | 4d-3p  | Total  |
|----------------------------------|--------|------------------------------|--------|--------|--------|--------|--------|
| <b>Pre-TS<sub>PE</sub>(L1)</b>   | -      | 0.0704                       | 0.1335 | 0.0719 | -      | 0.2024 | 0.5893 |
| <b>Pre-TS<sub>PE</sub>(L2)</b>   | -      | 0.0727                       | 0.1428 | 0.0605 | 0.0551 | 0.2177 | 0.6129 |
| <b>Pre-TS<sub>PE</sub>(L3)</b>   | -      | 0.0688                       | 0.1390 | 0.0592 | 0.0519 | 0.2166 | 0.5952 |
| <b>Pre-TS<sub>PE</sub>(L4)</b>   | -      | 0.0715                       | 0.1310 | 0.0605 | 0.0576 | 0.2114 | 0.6019 |
| <b>Pre-TS<sub>PE</sub>(L5)</b>   | -      | 0.0705                       | 0.1085 | 0.720  | 0.0556 | 0.2047 | 0.5843 |
| <b>Pre-TS<sub>PE</sub>(L6)</b>   | -      | 0.0695                       | 0.1099 | 0.0599 | 0.0594 | 0.2057 | 0.5667 |
| <b>Pre-TS<sub>PE</sub>(L7)</b>   | -      | 0.0705                       | 0.1157 | 0.0652 | 0.0580 | 0.2067 | 0.5888 |
| <b>Pre-TS<sub>PE</sub>(L8)</b>   | -      | 0.0720                       | 0.1305 | 0.0603 | 0.0581 | 0.2118 | 0.6027 |
| <b>Pre-TS<sub>PE</sub>(L9)</b>   | -      | 0.0714                       | 0.1283 | 0.0610 | 0.0573 | 0.2102 | 0.5984 |
| <b>Pre-TS<sub>PE</sub>(L10)</b>  | -      | 0.0710                       | 0.1202 | 0.0638 | 0.0570 | 0.2104 | 0.5938 |
| <b>Pre-TS<sub>PE</sub>(L11)</b>  | 0.0667 | 0.0679                       | 0.1050 | -      | 0.0531 | 0.1978 | 0.5715 |
| <b>Pre-TS<sub>PE</sub>(DMAc)</b> |        | 5s-2p (0.0508)/4d-2p(0.0626) |        |        |        |        | 0.2826 |

**Table S19** The AOPC for WBOs of Pd-C bond between palladium and arylation substrate in TS for coupling between EDOT (oxidative addition substrate) and EDOT (arylation substrate).

| TS                           | 6s-2p  | 5p-2s  | 5s-2p  | 4d-2s  | 4d-2p  | Total  |
|------------------------------|--------|--------|--------|--------|--------|--------|
| <b>TS<sub>EE</sub>(L1)</b>   | -      | -      | 0.0619 | 0.0543 | 0.1755 | 0.4179 |
| <b>TS<sub>EE</sub>(L2)</b>   | -      | -      | 0.0665 | -      | 0.1550 | 0.4148 |
| <b>TS<sub>EE</sub>(L3)</b>   | -      | -      | 0.0656 | -      | 0.1542 | 0.4179 |
| <b>TS<sub>EE</sub>(L4)</b>   | 0.0749 | 0.0501 | -      | -      | 0.1532 | 0.4276 |
| <b>TS<sub>EE</sub>(L5)</b>   | -      | -      | 0.0688 | 0.0548 | 0.1649 | 0.4450 |
| <b>TS<sub>EE</sub>(L6)</b>   | -      | -      | 0.0703 | 0.0519 | 0.1700 | 0.4307 |
| <b>TS<sub>EE</sub>(L7)</b>   | -      | -      | 0.0767 | 0.0520 | 0.1602 | 0.4421 |
| <b>TS<sub>EE</sub>(L8)</b>   | 0.0735 | -      | -      | -      | 0.1527 | 0.4100 |
| <b>TS<sub>EE</sub>(L9)</b>   | -      | -      | 0.0758 | -      | 0.1582 | 0.4174 |
| <b>TS<sub>EE</sub>(L10)</b>  | -      | -      | 0.0765 | -      | 0.1649 | 0.4283 |
| <b>TS<sub>EE</sub>(L11)</b>  | -      | -      | 0.0819 | 0.0501 | 0.1817 | 0.4542 |
| <b>TS<sub>EE</sub>(DMAc)</b> | -      | -      | 0.0950 | 0.0751 | 0.2644 | 0.5534 |

---

**Table S20** The AOPC for WBOs of Pd-C bond between palladium and arylation substrate in TS for coupling between benzene (oxidative addition substrate) and EDOT (arylation substrate).

| TS                           | 5s-2p  | 4d-2s  | 4d-2p  | Total  |
|------------------------------|--------|--------|--------|--------|
| <b>TS<sub>PE</sub>(L1)</b>   | 0.0693 | -      | 0.1502 | 0.4039 |
| <b>TS<sub>PE</sub>(L2)</b>   | 0.0715 | -      | 0.1376 | 0.3925 |
| <b>TS<sub>PE</sub>(L3)</b>   | 0.0720 | -      | 0.1341 | 0.3864 |
| <b>TS<sub>PE</sub>(L4)</b>   | 0.0788 | -      | 0.1309 | 0.3916 |
| <b>TS<sub>PE</sub>(L5)</b>   | 0.0686 | 0.0526 | 0.1378 | 0.3985 |
| <b>TS<sub>PE</sub>(L6)</b>   | 0.0718 | -      | 0.1306 | 0.3733 |
| <b>TS<sub>PE</sub>(L7)</b>   | 0.0798 | -      | 0.1370 | 0.3991 |
| <b>TS<sub>PE</sub>(L8)</b>   | 0.0802 | -      | 0.1335 | 0.3990 |
| <b>TS<sub>PE</sub>(L9)</b>   | 0.0800 | -      | 0.1344 | 0.3983 |
| <b>TS<sub>PE</sub>(L10)</b>  | 0.0804 | -      | 0.1403 | 0.4041 |
| <b>TS<sub>PE</sub>(L11)</b>  | 0.0853 | -      | 0.1477 | 0.4192 |
| <b>TS<sub>PE</sub>(DMAc)</b> | 0.0980 | 0.0631 | 0.2240 | 0.5057 |

**Table S21** The AOPC for WBOs of Pd-P bond between palladium and phosphine ligand in TS for coupling between EDOT (oxidative addition substrate) and EDOT (arylation substrate).

| TS                           | 6s-3s  | 6s-3p  | 5s-3s                           | 5s-3p  | 5p-3s  | 5p-3p  | 4d-3s  | 4d-3p  | Total  |
|------------------------------|--------|--------|---------------------------------|--------|--------|--------|--------|--------|--------|
| <b>TS<sub>EE</sub>(L1)</b>   | -      | -      | 0.0586                          | 0.1181 | 0.0728 | 0.0505 | -      | 0.1668 | 0.5282 |
| <b>TS<sub>EE</sub>(L2)</b>   | -      | -      | 0.0614                          | 0.1236 | 0.0638 | -      | -      | 0.1888 | 0.5595 |
| <b>TS<sub>EE</sub>(L3)</b>   | -      | -      | 0.0581                          | 0.1212 | 0.0657 | -      | -      | 0.1903 | 0.5551 |
| <b>TS<sub>EE</sub>(L4)</b>   | 0.0591 | 0.1151 |                                 |        | 0.0636 | 0.0512 | 0.0512 | 0.1818 | 0.5499 |
| <b>TS<sub>EE</sub>(L5)</b>   | -      | -      | 0.0575                          | 0.1001 | 0.0754 | 0.0575 | -      | 0.1616 | 0.5222 |
| <b>TS<sub>EE</sub>(L6)</b>   | -      | -      | 0.0585                          | 0.1025 | 0.0616 | -      | -      | 0.1577 | 0.4949 |
| <b>TS<sub>EE</sub>(L7)</b>   | -      | -      | 0.0582                          | 0.1034 | 0.0682 | 0.0514 | 0.0501 | 0.1750 | 0.5351 |
| <b>TS<sub>EE</sub>(L8)</b>   | 0.0602 | 0.1134 |                                 |        | 0.0645 | 0.0505 | 0.0516 | 0.1817 | 0.5507 |
| <b>TS<sub>EE</sub>(L9)</b>   | -      | -      | 0.0599                          | 0.1119 | 0.0645 | 0.0503 | 0.0501 | 0.1780 | 0.5429 |
| <b>TS<sub>EE</sub>(L10)</b>  | -      | -      | 0.0593                          | 0.1079 | 0.0670 | 0.0504 | -      | 0.1768 | 0.5393 |
| <b>TS<sub>EE</sub>(L11)</b>  | -      | -      | 0.0568                          | 0.0948 | 0.0703 | 0.0508 | -      | 0.1614 | 0.5067 |
| <b>TS<sub>EE</sub>(DMAc)</b> |        |        | 5s-2p (0.0509) / 4d-2p (0.0596) |        |        |        |        |        | 0.2543 |

**Table S22** The AOPC for WBOs of Pd-P bond between palladium and phosphine ligand in TS for coupling between benzene (oxidative addition substrate) and EDOT (arylation substrate).

| TS                           | 6s-3s | 6s-3p | 5s-3s                           | 5s-3p  | 5p-3s  | 5p-3p | 4d-3s | 4d-3p  | Total  |        |
|------------------------------|-------|-------|---------------------------------|--------|--------|-------|-------|--------|--------|--------|
| <b>TS<sub>PE</sub>(L1)</b>   | -     | -     | 0.0630                          | 0.1278 | 0.0724 | -     | -     | 0.1506 | 0.5206 |        |
| <b>TS<sub>PE</sub>(L2)</b>   | -     | -     | 0.0668                          | 0.1342 | 0.0647 | -     | -     | 0.1721 | 0.5544 |        |
| <b>TS<sub>PE</sub>(L3)</b>   | -     | -     | 0.0609                          | 0.1290 | 0.0646 | -     | -     | 0.1724 | 0.5386 |        |
| <b>TS<sub>PE</sub>(L4)</b>   | -     | -     | 0.0656                          | 0.1252 | 0.0636 | -     | -     | 0.1724 | 0.5497 |        |
| <b>TS<sub>PE</sub>(L5)</b>   | -     | -     | 0.0652                          | 0.1073 | 0.0781 | -     | -     | 0.1602 | 0.5359 |        |
| <b>TS<sub>PE</sub>(L6)</b>   | -     | -     | 0.0632                          | 0.1086 | 0.0620 | -     | -     | 0.1626 | 0.5107 |        |
| <b>TS<sub>PE</sub>(L7)</b>   | -     | -     | 0.0636                          | 0.1112 | 0.0665 | -     | -     | 0.1671 | 0.5315 |        |
| <b>TS<sub>PE</sub>(L8)</b>   | -     | -     | 0.0657                          | 0.1242 | 0.0639 | -     | -     | 0.1701 | 0.5476 |        |
| <b>TS<sub>PE</sub>(L9)</b>   | -     | -     | 0.0653                          | 0.1230 | 0.0640 | -     | -     | 0.1709 | 0.5449 |        |
| <b>TS<sub>PE</sub>(L10)</b>  | -     | -     | 0.0646                          | 0.1167 | 0.0675 | -     | -     | 0.1719 | 0.5440 |        |
| <b>TS<sub>PE</sub>(L11)</b>  | -     | -     | 0.0618                          | 0.1034 | 0.0708 | -     | -     | 0.1666 | 0.5240 |        |
| <b>TS<sub>PE</sub>(DMAc)</b> |       |       | 5s-2p (0.0517) / 4d-2p (0.0523) |        |        |       |       |        |        | 0.2449 |

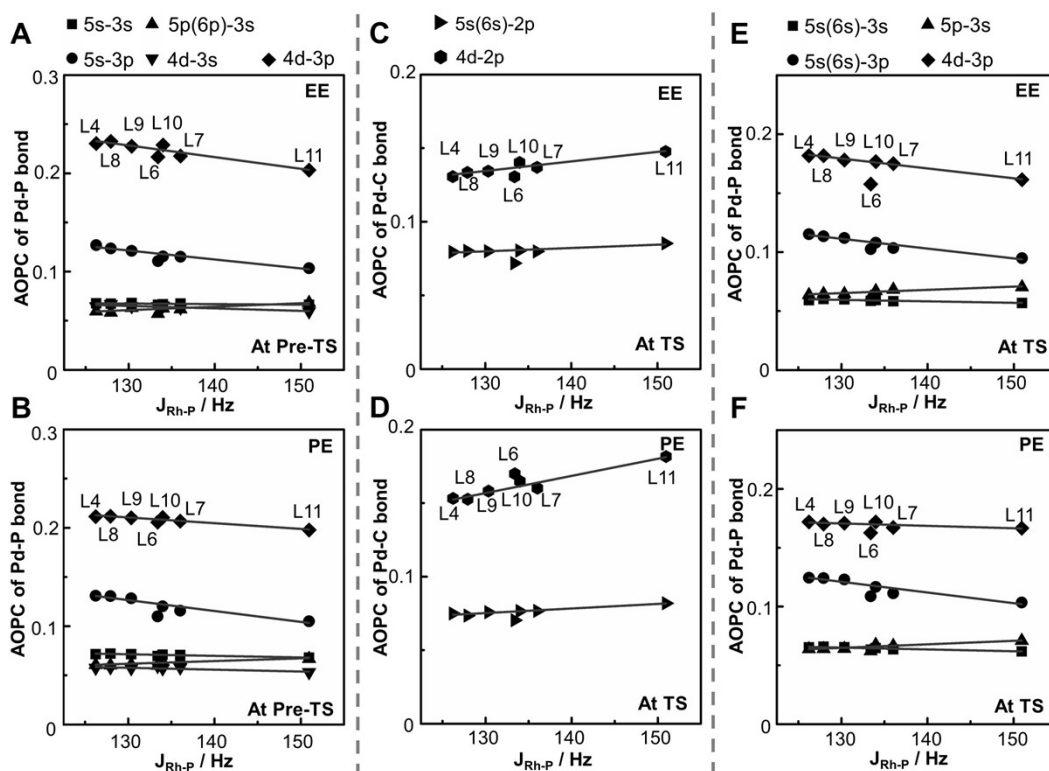

**Figure S7 (A and B)** The atomic orbital pair contribution of Pd(5s)-P(3s), Pd(5s)-P(3p), Pd(5p/6p)-P(3s), Pd(4d)-P(3s) and Pd(4d)-P(3p) to WBOs of the Pd-P bonds as a function of  $J_{Rh-P}$  for the pre-TS of the coupling between (A) EDOT/(B) benzene (oxidative addition substrate) and EDOT (arylation substrate). **(C and D)** The atomic orbital pair contribution of Pd(5s/6s)-C(2p) and Pd(4d)-C(2p) to WBOs of the Pd-C bonds as a function of  $J_{Rh-P}$  for the TS of the coupling between (C) EDOT/(D) benzene (oxidative addition substrate) and EDOT (arylation substrate). **(E and F)** The atomic orbital pair contribution of Pd(5s/6s)-P(3s), Pd(5s/6s)-P(3p), Pd(5p)-P(3s) and Pd(4d)-P(3p) to WBOs of the Pd-P bonds as a function of  $J_{Rh-P}$  for the pre-TS of coupling between (E) EDOT/(F) benzene (oxidative addition substrate) and EDOT (arylation substrate).

**Table S23** The AOPC for WBOs of EDOT C<sub>α</sub>-C<sub>β</sub> bond in Pre-TS for the coupling between EDOT (oxidative addition substrate) and EDOT (arylation substrate).

| State                            | 2px-2px | 2px-2py | 2py-2px | 2pz-2pz | 2p-2p  | Total  |
|----------------------------------|---------|---------|---------|---------|--------|--------|
| <b>EDOT</b>                      | 0.2017  | 0.0894  | 0.0588  | 0.5414  | 0.8969 | 1.5443 |
| <b>Pre-TS<sub>EE</sub>(L1)</b>   | 0.2042  | 0.0910  | 0.0664  | 0.4980  | 0.8730 | 1.5098 |
| <b>Pre-TS<sub>EE</sub>(L2)</b>   | 0.2016  | 0.0901  | 0.0639  | 0.5010  | 0.8771 | 1.5153 |
| <b>Pre-TS<sub>EE</sub>(L3)</b>   | 0.2003  | 0.0898  | 0.0632  | 0.4991  | 0.8766 | 1.5149 |
| <b>Pre-TS<sub>EE</sub>(L4)</b>   | 0.2009  | 0.0900  | 0.0637  | 0.4946  | 0.8738 | 1.5112 |
| <b>Pre-TS<sub>EE</sub>(L5)</b>   | 0.2023  | 0.0910  | 0.0650  | 0.4936  | 0.8709 | 1.5082 |
| <b>Pre-TS<sub>EE</sub>(L6)</b>   | 0.2008  | 0.0906  | 0.0643  | 0.5018  | 0.8769 | 1.5148 |
| <b>Pre-TS<sub>EE</sub>(L7)</b>   | 0.2016  | 0.0906  | 0.0644  | 0.4943  | 0.8724 | 1.5096 |
| <b>Pre-TS<sub>EE</sub>(L8)</b>   | 0.2055  | 0.0902  | 0.0601  | 0.4913  | 0.8707 | 1.5071 |
| <b>Pre-TS<sub>EE</sub>(L9)</b>   | 0.2050  | 0.0902  | 0.0600  | 0.4959  | 0.8728 | 1.5101 |
| <b>Pre-TS<sub>EE</sub>(L10)</b>  | 0.2086  | 0.0902  | 0.0630  | 0.4886  | 0.8662 | 1.5024 |
| <b>Pre-TS<sub>EE</sub>(L11)</b>  | 0.2057  | 0.0903  | 0.0624  | 0.4751  | 0.8614 | 1.4959 |
| <b>Pre-TS<sub>EE</sub>(DMAc)</b> | 0.2063  | 0.0749  | 0.0903  | 0.4418  | 0.8426 | 1.4693 |

---

**Table S24** The AOPC for WBOs of EDOT C<sub>α</sub>-C<sub>β</sub> bond in Pre-TS for the coupling between benzene (oxidative addition substrate) and EDOT (arylation substrate).

| State                            | 2px-2px | 2px-2py | 2py-2px | 2pz-2pz | 2p-2p  | Total  |
|----------------------------------|---------|---------|---------|---------|--------|--------|
| <b>EDOT</b>                      | 0.2017  | 0.0894  | 0.0588  | 0.5414  | 0.8969 | 1.5443 |
| <b>Pre-TS<sub>PE</sub>(L1)</b>   | 0.2027  | 0.0910  | 0.0657  | 0.5048  | 0.8768 | 1.5145 |
| <b>Pre-TS<sub>PE</sub>(L2)</b>   | 0.2015  | 0.0907  | 0.0646  | 0.5047  | 0.8776 | 1.5155 |
| <b>Pre-TS<sub>PE</sub>(L3)</b>   | 0.2002  | 0.0907  | 0.0638  | 0.5021  | 0.8765 | 1.5151 |
| <b>Pre-TS<sub>PE</sub>(L4)</b>   | 0.2069  | 0.0906  | 0.0641  | 0.4983  | 0.8700 | 1.5086 |
| <b>Pre-TS<sub>PE</sub>(L5)</b>   | 0.2068  | 0.0907  | 0.0643  | 0.4986  | 0.8697 | 1.5092 |
| <b>Pre-TS<sub>PE</sub>(L6)</b>   | 0.2059  | 0.0907  | 0.0641  | 0.5004  | 0.8717 | 1.5113 |
| <b>Pre-TS<sub>PE</sub>(L7)</b>   | 0.2069  | 0.0907  | 0.0647  | 0.4956  | 0.8684 | 1.5072 |
| <b>Pre-TS<sub>PE</sub>(L8)</b>   | 0.2066  | 0.0906  | 0.0638  | 0.4984  | 0.8703 | 1.5093 |
| <b>Pre-TS<sub>PE</sub>(L9)</b>   | 0.2068  | 0.0905  | 0.0641  | 0.4970  | 0.8696 | 1.5080 |
| <b>Pre-TS<sub>PE</sub>(L10)</b>  | 0.2089  | 0.0896  | 0.0592  | 0.4983  | 0.8736 | 1.5111 |
| <b>Pre-TS<sub>PE</sub>(L11)</b>  | 0.2081  | 0.0911  | 0.0666  | 0.4859  | 0.8628 | 1.4992 |
| <b>Pre-TS<sub>PE</sub>(DMAc)</b> | 0.2029  | 0.0728  | 0.0936  | 0.4552  | 0.8494 | 1.4798 |

---

**Table S25** The energy levels for the frontier orbitals of EDOT and those of Pre-TS EDOT for the coupling between EDOT (oxidative addition substrate) and EDOT (arylation substrate).

|                                | LUMO<br>(eV) | HOMO<br>(eV) | HOMO-1<br>(eV) | HOMO-2<br>(eV) | HOMO-3<br>(eV) |
|--------------------------------|--------------|--------------|----------------|----------------|----------------|
| <b>EDOT</b>                    | -1.05        | -5.46        | -5.54          | -7.67          | -8.23          |
| <b>EDOT<sub>EE</sub>(L1)</b>   | -1.29        | -5.39        | -5.49          | -7.84          | -8.23          |
| <b>EDOT<sub>EE</sub>(L2)</b>   | -1.24        | -5.38        | -5.49          | -7.83          | -8.24          |
| <b>EDOT<sub>EE</sub>(L3)</b>   | -1.24        | -5.38        | -5.49          | -7.81          | -8.25          |
| <b>EDOT<sub>EE</sub>(L4)</b>   | -1.26        | -5.38        | -5.49          | -7.82          | -8.25          |
| <b>EDOT<sub>EE</sub>(L5)</b>   | -1.28        | -5.38        | -5.49          | -7.84          | -8.24          |
| <b>EDOT<sub>EE</sub>(L6)</b>   | -1.24        | -5.39        | -5.49          | -7.83          | -8.98          |
| <b>EDOT<sub>EE</sub>(L7)</b>   | -1.27        | -5.38        | -5.49          | -7.83          | -8.25          |
| <b>EDOT<sub>EE</sub>(L8)</b>   | -1.26        | -5.37        | -5.51          | -7.84          | -8.25          |
| <b>EDOT<sub>EE</sub>(L9)</b>   | -1.24        | -5.37        | -5.51          | -7.82          | -8.26          |
| <b>EDOT<sub>EE</sub>(L10)</b>  | -1.31        | -5.39        | -5.50          | -7.85          | -8.23          |
| <b>EDOT<sub>EE</sub>(L11)</b>  | -1.33        | -5.37        | -5.51          | -7.85          | -8.26          |
| <b>EDOT<sub>EE</sub>(DMAc)</b> | -1.30        | -5.22        | -5.33          | -7.70          | -8.05          |

---

**Table S26** The energy levels for the frontier orbitals of Pre-TS EDOT for the coupling between benzene (oxidative addition substrate) and EDOT (arylation substrate).

|                                | LUMO<br>(eV) | HOMO<br>(eV) | HOMO-1<br>(eV) | HOMO-2<br>(eV) | HOMO-3<br>(eV) |
|--------------------------------|--------------|--------------|----------------|----------------|----------------|
| <b>EDOT<sub>PE</sub>(L1)</b>   | -1.25        | -5.40        | -5.48          | -7.82          | -8.24          |
| <b>EDOT<sub>PE</sub>(L2)</b>   | -1.24        | -5.40        | -5.48          | -7.81          | -8.25          |
| <b>EDOT<sub>PE</sub>(L3)</b>   | -1.23        | -5.39        | -5.49          | -7.79          | -8.26          |
| <b>EDOT<sub>PE</sub>(L4)</b>   | -1.30        | -5.41        | -5.49          | -7.85          | -8.22          |
| <b>EDOT<sub>PE</sub>(L5)</b>   | -1.31        | -5.41        | -5.49          | -7.85          | -8.22          |
| <b>EDOT<sub>PE</sub>(L6)</b>   | -1.29        | -5.42        | -5.50          | -7.84          | -8.22          |
| <b>EDOT<sub>PE</sub>(L7)</b>   | -1.32        | -5.41        | -5.49          | -7.85          | -8.21          |
| <b>EDOT<sub>PE</sub>(L8)</b>   | -1.30        | -5.41        | -5.49          | -7.84          | -8.22          |
| <b>EDOT<sub>PE</sub>(L9)</b>   | -1.30        | -5.40        | -5.49          | -7.85          | -8.22          |
| <b>EDOT<sub>PE</sub>(L10)</b>  | -1.27        | -5.38        | -5.50          | -7.87          | -8.22          |
| <b>EDOT<sub>PE</sub>(L11)</b>  | -1.37        | -5.41        | -5.49          | -7.87          | -8.20          |
| <b>EDOT<sub>PE</sub>(DMAc)</b> | -1.25        | -5.24        | -5.31          | -7.67          | -8.07          |

---

**Table S27** The frontier orbitals diagrams of EDOT and those of Pre-TS EDOT for the coupling between EDOT (oxidative addition substrate) and EDOT (arylation substrate).

|                          | LUMO                                                                                | HOMO                                                                                | HOMO-1                                                                              | HOMO-2                                                                                | HOMO-3                                                                                |
|--------------------------|-------------------------------------------------------------------------------------|-------------------------------------------------------------------------------------|-------------------------------------------------------------------------------------|---------------------------------------------------------------------------------------|---------------------------------------------------------------------------------------|
| EDOT                     | 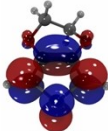   |    |    |    |    |
| EDOT <sub>EE</sub> (L1)  |    |    |    |    |    |
| EDOT <sub>EE</sub> (L2)  |    |    |    |    |    |
| EDOT <sub>EE</sub> (L3)  |    |    |    |    |    |
| EDOT <sub>EE</sub> (L4)  |   |   |   |   |   |
| EDOT <sub>EE</sub> (L5)  |  |  |  |  |  |
| EDOT <sub>EE</sub> (L6)  |  |  |  |  |  |
| EDOT <sub>EE</sub> (L7)  |  |  |  |  |  |
| EDOT <sub>EE</sub> (L8)  |  |  |  |  |  |
| EDOT <sub>EE</sub> (L9)  |  |  |  |  |  |
| EDOT <sub>EE</sub> (L10) |  |  |  |  |  |
| EDOT <sub>EE</sub> (L11) |  |  |  |  |  |

---

EDOT<sub>EE</sub>(DMAc)

---

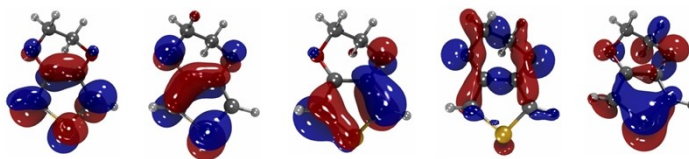

**Table S28** The frontier orbitals diagrams of Pre-TS EDOTs for the coupling between benzene (oxidative addition substrate) and EDOT (arylation substrate).

|                          | LUMO | HOMO | HOMO-1 | HOMO-2 | HOMO-3 |
|--------------------------|------|------|--------|--------|--------|
| EDOT <sub>PE</sub> (L1)  |      |      |        |        |        |
| EDOT <sub>PE</sub> (L2)  |      |      |        |        |        |
| EDOT <sub>PE</sub> (L3)  |      |      |        |        |        |
| EDOT <sub>PE</sub> (L4)  |      |      |        |        |        |
| EDOT <sub>PE</sub> (L5)  |      |      |        |        |        |
| EDOT <sub>PE</sub> (L6)  |      |      |        |        |        |
| EDOT <sub>PE</sub> (L7)  |      |      |        |        |        |
| EDOT <sub>PE</sub> (L8)  |      |      |        |        |        |
| EDOT <sub>PE</sub> (L9)  |      |      |        |        |        |
| EDOT <sub>PE</sub> (L10) |      |      |        |        |        |

---

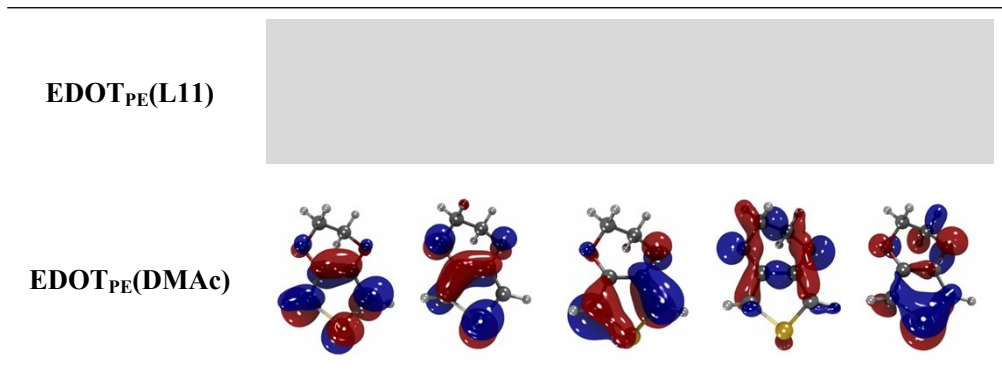

## 6. Cartesian Coordinates

### EDOT

-----

M06-L electronic energy (Hartree): -780.905491

M06-L thermal correction to free energy (Hartree): 0.079796

Three lowest frequencies (cm<sup>-1</sup>): 116.61, 202.45, 311.65

-----

|   |             |             |             |
|---|-------------|-------------|-------------|
| C | 0.00896600  | 0.71275100  | -0.04215700 |
| C | 0.00896100  | -0.71275000 | 0.04210900  |
| C | -1.25025100 | 1.24181100  | -0.07593800 |
| C | -1.25026200 | -1.24179200 | 0.07599900  |
| S | -2.44153100 | -0.00000200 | 0.00000900  |
| O | 1.15660300  | 1.44440600  | -0.09698700 |
| C | 2.29874400  | 0.68170400  | 0.32061000  |
| O | 1.15658300  | -1.44440800 | 0.09696500  |
| C | 2.29876300  | -0.68170700 | -0.32058500 |
| H | -1.53452900 | 2.28111300  | -0.13349700 |
| H | 3.17501200  | 1.25413500  | 0.01740000  |
| H | 2.29420700  | 0.59264600  | 1.41376400  |
| H | 3.17501200  | -1.25413300 | -0.01731700 |
| H | -1.53448700 | -2.28113500 | 0.13318100  |
| H | 2.29427300  | -0.59266400 | -1.41373700 |

### Int<sub>EE</sub>(L1)

-----

M06-L electronic energy (Hartree): -1951.834633

M06-L thermal correction to free energy (Hartree): 0.465889

Three lowest frequencies (cm<sup>-1</sup>): 9.58, 26.96, 44.20

-----

|    |             |            |             |
|----|-------------|------------|-------------|
| Pd | 0.06706600  | 1.09030800 | -0.08291400 |
| O  | -0.86628400 | 3.07988500 | -0.12771700 |

---

|   |             |             |             |
|---|-------------|-------------|-------------|
| O | 1.30341200  | 2.91856900  | -0.50274500 |
| C | 0.25929600  | 3.63130500  | -0.36825600 |
| C | 0.34555500  | 5.12307700  | -0.46207600 |
| C | -1.55957800 | 0.13641500  | 0.52227700  |
| C | -2.65892400 | -0.25320400 | -0.19994800 |
| S | -1.99932300 | 0.22402500  | 2.20804300  |
| C | -3.82040300 | -0.52704000 | 0.59112300  |
| C | -3.62462900 | -0.31412100 | 1.92747700  |
| H | -4.32587600 | -0.45894300 | 2.73975600  |
| O | -2.67630400 | -0.36479400 | -1.57149300 |
| C | -3.73824500 | -1.21921200 | -2.00810300 |
| H | -3.49742800 | -2.26357400 | -1.75530900 |
| O | -4.99290500 | -0.97462000 | 0.05302500  |
| C | -5.04183800 | -0.81168600 | -1.36957500 |
| H | -5.86624400 | -1.44039000 | -1.71537300 |
| H | -5.26923400 | 0.23720300  | -1.60982300 |
| H | -3.78448300 | -1.11815300 | -3.09495000 |
| H | 0.47351200  | 5.54241000  | 0.54283700  |
| H | 1.20292600  | 5.43110500  | -1.06564500 |
| H | -0.57485900 | 5.54235500  | -0.87754200 |
| C | 2.51976000  | -0.40375700 | 1.55128100  |
| C | 2.62847800  | -0.63211100 | -1.56915700 |
| C | 0.77513600  | -2.51330800 | 0.03791400  |
| P | 1.48923400  | -0.73369600 | -0.02863100 |
| C | 1.90830100  | -1.25987700 | -2.76798800 |
| H | 0.88521600  | -0.87770700 | -2.87821100 |
| H | 2.46069600  | -0.98920700 | -3.67761700 |
| H | 1.87183500  | -2.35163900 | -2.73002300 |
| C | 2.86080900  | 0.83392600  | -1.95014200 |
| H | 1.92915200  | 1.31791100  | -2.26095200 |
| H | 3.29369600  | 1.44165200  | -1.15368900 |
| H | 3.55229000  | 0.85476500  | -2.80391000 |
| C | 3.98839700  | -1.31137100 | -1.38315500 |
| H | 3.92006300  | -2.35786500 | -1.07342800 |
| H | 4.51531000  | -1.29095400 | -2.34715600 |
| H | 4.62321100  | -0.78536000 | -0.66328300 |
| C | 1.81770000  | -3.61239500 | -0.19770600 |
| H | 1.31617100  | -4.58169500 | -0.07184800 |
| H | 2.22671000  | -3.59887800 | -1.21170000 |
| H | 2.65082500  | -3.58495900 | 0.51059100  |
| C | -0.33403600 | -2.67298700 | -1.01622400 |
| H | 0.05898400  | -2.92533900 | -2.00404800 |
| H | -0.98498400 | -3.50392200 | -0.71193600 |
| H | -0.95891300 | -1.78327800 | -1.11620000 |

---

|   |             |             |            |
|---|-------------|-------------|------------|
| C | 0.14056700  | -2.75824200 | 1.41140200 |
| H | 0.87473900  | -2.78884600 | 2.22206800 |
| H | -0.62370300 | -2.01387100 | 1.65455300 |
| H | -0.34749600 | -3.74160400 | 1.38747800 |
| C | 1.55803900  | -0.04946400 | 2.69595100 |
| H | 0.82374600  | -0.82747500 | 2.91942700 |
| H | 2.15032300  | 0.11941000  | 3.60587700 |
| H | 1.00850700  | 0.87602100  | 2.47854300 |
| C | 3.41747400  | -1.56281800 | 1.98946500 |
| H | 4.03134600  | -1.22384400 | 2.83529700 |
| H | 2.85020000  | -2.43153900 | 2.33790900 |
| H | 4.10334700  | -1.89389700 | 1.20365500 |
| C | 3.38871200  | 0.83996200  | 1.33024300 |
| H | 4.21899700  | 0.66926100  | 0.63812000 |
| H | 2.80155300  | 1.69283600  | 0.96814700 |
| H | 3.82870600  | 1.12401100  | 2.29585000 |

Pre-TS<sub>EE</sub>(L1)

-----  
M06-L electronic energy (Hartree): -2732.749040

M06-L thermal correction to free energy (Hartree): 0.568997

Three lowest frequencies (cm<sup>-1</sup>): 21.60, 29.17, 36.05

-----

|    |             |             |             |
|----|-------------|-------------|-------------|
| Pd | -0.35058100 | 0.73934500  | -0.10926200 |
| O  | -0.92536000 | 3.47453600  | -1.44136600 |
| O  | -1.35129000 | 2.55663200  | 0.57006300  |
| C  | -1.38913100 | 3.52224700  | -0.28709900 |
| C  | -2.08518500 | 4.77057400  | 0.21331600  |
| C  | 0.89550400  | -0.70723800 | -0.64868800 |
| C  | 1.69451600  | -1.49560700 | 0.13815600  |
| S  | 1.31339900  | -0.97384900 | -2.31422000 |
| C  | 2.61192800  | -2.31642100 | -0.58571400 |
| C  | 2.51998000  | -2.16252000 | -1.94500500 |
| H  | 3.10892700  | -2.64317800 | -2.71603000 |
| O  | 1.60287800  | -1.53620100 | 1.51201400  |
| C  | 2.27750400  | -2.66879200 | 2.06086300  |
| H  | 1.66893300  | -3.57494700 | 1.90888400  |
| O  | 3.50018600  | -3.15310700 | 0.03043500  |
| C  | 3.63301000  | -2.84480600 | 1.42383600  |
| H  | 4.17721700  | -3.68189300 | 1.86782000  |
| H  | 4.22813800  | -1.92528500 | 1.53916100  |
| H  | 2.36660700  | -2.47943100 | 3.13416800  |
| C  | 3.54233100  | 1.24455500  | 0.79785500  |

---

|   |             |             |             |
|---|-------------|-------------|-------------|
| C | 2.76256700  | 1.75988400  | -0.26619700 |
| C | 2.92689800  | 1.39593600  | 2.01708500  |
| C | 1.50151000  | 2.20772600  | 0.12609900  |
| S | 1.38798500  | 2.13039400  | 1.88074300  |
| O | 4.76194800  | 0.67477300  | 0.61353600  |
| C | 4.98095800  | 0.34647800  | -0.76960300 |
| O | 3.19773600  | 1.81369000  | -1.53543200 |
| C | 4.60032300  | 1.49768300  | -1.66231000 |
| H | 3.28286600  | 1.02144800  | 2.96985600  |
| H | 6.04534800  | 0.11999100  | -0.85982200 |
| H | 4.39393400  | -0.54714300 | -1.02626900 |
| H | 4.75198600  | 1.24779500  | -2.71441000 |
| H | 0.94147200  | 2.95850200  | -0.42626100 |
| H | -3.16731500 | 4.59199100  | 0.25496200  |
| H | -1.76615400 | 5.01972200  | 1.23062100  |
| H | -1.90243000 | 5.62134700  | -0.44815600 |
| H | 5.17944300  | 2.39702600  | -1.41669400 |
| C | -3.71769700 | 0.27441400  | -0.85109600 |
| C | -2.65735700 | -0.90826100 | 1.84910600  |
| C | -2.20285300 | -2.43134700 | -0.82037000 |
| P | -2.26304000 | -0.67876300 | -0.01384400 |
| C | -1.73128600 | -1.97259500 | 2.44686400  |
| H | -0.67486000 | -1.76312600 | 2.23676000  |
| H | -1.86185400 | -1.96254300 | 3.53780700  |
| H | -1.96457900 | -2.98638900 | 2.10604000  |
| C | -2.33537400 | 0.40070200  | 2.58078000  |
| H | -1.27683500 | 0.66987000  | 2.47240600  |
| H | -2.92493900 | 1.25248900  | 2.23631400  |
| H | -2.54200800 | 0.25565400  | 3.65047500  |
| C | -4.10778300 | -1.29938200 | 2.15180300  |
| H | -4.41083500 | -2.23999000 | 1.68546200  |
| H | -4.20425600 | -1.43263100 | 3.23837300  |
| H | -4.82836200 | -0.52957400 | 1.86298000  |
| C | -3.37595300 | -3.32392000 | -0.38609300 |
| H | -3.37124100 | -4.21693600 | -1.02593000 |
| H | -3.26079200 | -3.67572500 | 0.64424300  |
| H | -4.36077800 | -2.86408900 | -0.48096400 |
| C | -0.91299400 | -3.20705600 | -0.48368500 |
| H | -1.12643500 | -4.27755000 | -0.60923000 |
| H | -0.10185800 | -2.95455700 | -1.16892100 |
| H | -0.54427500 | -3.06045800 | 0.53197900  |
| C | -2.21634400 | -2.29213200 | -2.34694200 |
| H | -3.17208200 | -1.95175800 | -2.75350300 |
| H | -1.42382700 | -1.62003400 | -2.69710200 |

---

|   |             |             |             |
|---|-------------|-------------|-------------|
| H | -2.01645400 | -3.28199900 | -2.77971700 |
| C | -3.16023900 | 0.89348600  | -2.14090500 |
| H | -2.79487800 | 0.15213000  | -2.85708400 |
| H | -3.96456300 | 1.45719300  | -2.63454700 |
| H | -2.34144500 | 1.59196500  | -1.92662900 |
| C | -4.95918200 | -0.56150300 | -1.17980500 |
| H | -5.70949000 | 0.11514000  | -1.61192700 |
| H | -4.78562800 | -1.35093500 | -1.91499000 |
| H | -5.41129100 | -1.01154100 | -0.28907900 |
| C | -4.20156900 | 1.43707000  | 0.02550100  |
| H | -4.78293000 | 1.10466600  | 0.89056000  |
| H | -3.38349200 | 2.06747800  | 0.37418200  |
| H | -4.87204700 | 2.05653900  | -0.58691600 |

TS<sub>EE</sub>(L1)

-----

M06-L electronic energy (Hartree): -2732.720523

M06-L thermal correction to free energy (Hartree): 0.567653

Three lowest frequencies (cm<sup>-1</sup>): -483.15, 24.62, 31.33

-----

|    |             |             |             |
|----|-------------|-------------|-------------|
| Pd | -0.35407100 | 0.65521500  | -0.02827800 |
| O  | 0.49548100  | 3.73818300  | -0.78174000 |
| O  | -1.28469600 | 2.70039900  | 0.11723200  |
| C  | -0.75250000 | 3.68323100  | -0.44399900 |
| C  | -1.58319900 | 4.87959900  | -0.79262200 |
| C  | 0.73570900  | -0.90309900 | -0.63124800 |
| C  | 1.67606600  | -1.63310700 | 0.04819100  |
| S  | 0.96709500  | -1.16788900 | -2.33909600 |
| C  | 2.53868600  | -2.41733900 | -0.77636500 |
| C  | 2.28050900  | -2.27696200 | -2.11339600 |
| H  | 2.74476300  | -2.79383200 | -2.94428900 |
| O  | 1.81117100  | -1.60192100 | 1.41773000  |
| C  | 2.53633200  | -2.73370500 | 1.89768400  |
| H  | 1.90667100  | -3.63532900 | 1.83344600  |
| O  | 3.52004800  | -3.22506200 | -0.26478000 |
| C  | 3.80497800  | -2.92780600 | 1.10672500  |
| H  | 4.38573800  | -3.77333300 | 1.48410500  |
| H  | 4.42367200  | -2.01824200 | 1.16646400  |
| H  | 2.75953600  | -2.53137600 | 2.94871500  |
| C  | 3.81829400  | 1.25073600  | 0.89320400  |
| C  | 2.80863500  | 1.28533700  | -0.10948200 |
| C  | 3.33636500  | 1.56815300  | 2.13668700  |
| C  | 1.52731500  | 1.60248100  | 0.32927900  |
| S  | 1.64555700  | 1.88144600  | 2.06716800  |

---

|   |             |             |             |
|---|-------------|-------------|-------------|
| O | 5.12049900  | 0.93237300  | 0.62878700  |
| C | 5.25675500  | 0.30184100  | -0.65098100 |
| O | 3.08987700  | 1.05873500  | -1.41727200 |
| C | 4.49372800  | 1.06146800  | -1.70315000 |
| H | 3.89999600  | 1.64162800  | 3.05976500  |
| H | 6.32706100  | 0.28641700  | -0.86915400 |
| H | 4.88665400  | -0.73407400 | -0.59485600 |
| H | 4.60115400  | 0.59268400  | -2.68477400 |
| H | 0.97429900  | 2.78342600  | -0.36980800 |
| H | -1.94073100 | 4.77059300  | -1.82385800 |
| H | -2.45750800 | 4.94395600  | -0.14089000 |
| H | -0.99864100 | 5.80103100  | -0.74080700 |
| H | 4.84886200  | 2.10015800  | -1.76089700 |
| C | -3.50663700 | -0.01047600 | -1.45845200 |
| C | -3.44348500 | 0.02045300  | 1.66325100  |
| C | -2.41904200 | -2.45113000 | 0.15736000  |
| P | -2.49702500 | -0.52612700 | 0.08331100  |
| C | -2.85546500 | -0.71630300 | 2.87299700  |
| H | -1.75824300 | -0.66814200 | 2.88894000  |
| H | -3.21948700 | -0.22514900 | 3.78559600  |
| H | -3.15792900 | -1.76449900 | 2.93331800  |
| C | -3.20238100 | 1.50789300  | 1.94027500  |
| H | -2.14470400 | 1.71236700  | 2.13944000  |
| H | -3.51675200 | 2.16677700  | 1.12941600  |
| H | -3.77285500 | 1.78052300  | 2.83962100  |
| C | -4.95729100 | -0.21425200 | 1.61543000  |
| H | -5.23907200 | -1.24029000 | 1.36607800  |
| H | -5.37248000 | 0.00626800  | 2.60912300  |
| H | -5.45920700 | 0.45446000  | 0.90844400  |
| C | -3.73189600 | -3.14229200 | 0.54722400  |
| H | -3.56708900 | -4.22814900 | 0.49854800  |
| H | -4.04602000 | -2.91969400 | 1.57101900  |
| H | -4.56381100 | -2.91301700 | -0.12636300 |
| C | -1.33851500 | -2.88327800 | 1.16801200  |
| H | -1.73472000 | -2.98231700 | 2.18170600  |
| H | -0.96004000 | -3.87297600 | 0.87659300  |
| H | -0.48261600 | -2.20450700 | 1.20044200  |
| C | -2.00751400 | -3.00169000 | -1.21279700 |
| H | -2.76278900 | -2.83723600 | -1.98711800 |
| H | -1.05642300 | -2.58825300 | -1.55803000 |
| H | -1.88296800 | -4.08890300 | -1.11722700 |
| C | -2.54395200 | -0.03638400 | -2.65525200 |
| H | -2.10553500 | -1.02011100 | -2.84579000 |
| H | -3.09107900 | 0.26688600  | -3.55912300 |

---

|   |             |             |             |
|---|-------------|-------------|-------------|
| H | -1.71714900 | 0.67269100  | -2.50724600 |
| C | -4.73509200 | -0.86816300 | -1.76772600 |
| H | -5.25259300 | -0.43576000 | -2.63563900 |
| H | -4.48535300 | -1.90097300 | -2.02792200 |
| H | -5.45230000 | -0.88870200 | -0.94059700 |
| C | -3.96470400 | 1.44507200  | -1.30994800 |
| H | -4.75927400 | 1.56856600  | -0.56750900 |
| H | -3.13737600 | 2.11255500  | -1.04666800 |
| H | -4.37268200 | 1.77563000  | -2.27530100 |

Post-TS<sub>EE</sub>(L1)

-----  
M06-L electronic energy (Hartree): -2732.725075

M06-L thermal correction to free energy (Hartree): 0.565592

Three lowest frequencies (cm<sup>-1</sup>): 17.35, 23.61, 28.32

-----

|    |             |             |             |
|----|-------------|-------------|-------------|
| Pd | -0.25510500 | 0.60635000  | 0.00168200  |
| O  | 0.62818000  | 3.54259200  | -1.19936900 |
| O  | -1.06054300 | 2.77272200  | 0.07577600  |
| C  | -0.56769700 | 3.64284200  | -0.65170600 |
| C  | -1.30148300 | 4.88963000  | -1.01075900 |
| C  | 0.72696200  | -1.01599300 | -0.60235700 |
| C  | 1.56575000  | -1.87456000 | 0.05834000  |
| S  | 0.88807400  | -1.29416000 | -2.31502300 |
| C  | 2.27593500  | -2.78176600 | -0.78721700 |
| C  | 2.01573400  | -2.59588300 | -2.11787100 |
| H  | 2.37950400  | -3.17213800 | -2.95944700 |
| O  | 1.73056600  | -1.88037300 | 1.42706000  |
| C  | 2.24154000  | -3.13592500 | 1.87766000  |
| H  | 1.45899600  | -3.90688200 | 1.79426200  |
| O  | 3.10887400  | -3.75217000 | -0.30064600 |
| C  | 3.45229400  | -3.53489100 | 1.07169700  |
| H  | 3.87648600  | -4.47682700 | 1.42936000  |
| H  | 4.22155400  | -2.75058000 | 1.13916100  |
| H  | 2.49808500  | -3.00355800 | 2.93180400  |
| C  | 3.94051100  | 1.55141400  | 0.88829400  |
| C  | 2.93031300  | 1.15052800  | -0.04118100 |
| C  | 3.42988800  | 2.08609900  | 2.03984600  |
| C  | 1.63035700  | 1.37009300  | 0.37093900  |
| S  | 1.70377100  | 2.09506600  | 1.96836900  |
| O  | 5.27693600  | 1.41558000  | 0.63628800  |
| C  | 5.51967200  | 0.48949700  | -0.42826400 |

---

|   |             |             |             |
|---|-------------|-------------|-------------|
| O | 3.25081200  | 0.60522000  | -1.25252900 |
| C | 4.62340300  | 0.78806800  | -1.60138500 |
| H | 3.97621700  | 2.49444800  | 2.88148600  |
| H | 6.57445700  | 0.59894800  | -0.69151000 |
| H | 5.34388200  | -0.53692500 | -0.07063800 |
| H | 4.81585400  | 0.10220300  | -2.43131700 |
| H | 1.04477800  | 2.69931000  | -0.82947600 |
| H | -1.66500600 | 4.80329600  | -2.04160400 |
| H | -2.15856000 | 5.03033000  | -0.35046900 |
| H | -0.64161400 | 5.76002000  | -0.97199800 |
| H | 4.78483700  | 1.82054100  | -1.94714300 |
| C | -3.51327000 | 0.18458100  | -1.42024400 |
| C | -3.41432300 | 0.22480800  | 1.69692400  |
| C | -2.60242800 | -2.32668400 | 0.18741300  |
| P | -2.52991900 | -0.40414400 | 0.11344800  |
| C | -2.88143900 | -0.54919900 | 2.90874900  |
| H | -1.78397400 | -0.59095500 | 2.92240000  |
| H | -3.20190400 | -0.02612100 | 3.82001700  |
| H | -3.26940500 | -1.56889000 | 2.97459700  |
| C | -3.03680800 | 1.68772400  | 1.95266000  |
| H | -1.95862600 | 1.79730700  | 2.11819800  |
| H | -3.31506100 | 2.36762900  | 1.14558600  |
| H | -3.55169000 | 2.01897300  | 2.86565300  |
| C | -4.94161400 | 0.11306900  | 1.67013900  |
| H | -5.30229800 | -0.89842900 | 1.46482700  |
| H | -5.32927200 | 0.40294300  | 2.65723100  |
| H | -5.39941900 | 0.78788400  | 0.94015300  |
| C | -3.95975300 | -2.92062300 | 0.57892500  |
| H | -3.88165000 | -4.01553300 | 0.51790800  |
| H | -4.24667300 | -2.68400200 | 1.60780900  |
| H | -4.77685500 | -2.61785600 | -0.08289500 |
| C | -1.55230900 | -2.83650600 | 1.19267700  |
| H | -1.93579400 | -2.87587800 | 2.21510100  |
| H | -1.27277100 | -3.86344800 | 0.91811800  |
| H | -0.63802500 | -2.23755400 | 1.19244900  |
| C | -2.22364900 | -2.89790600 | -1.18363800 |
| H | -2.95989900 | -2.67527800 | -1.96173400 |
| H | -1.24368000 | -2.54723900 | -1.51937600 |
| H | -2.17457200 | -3.99197700 | -1.09571300 |
| C | -2.55763000 | 0.09871600  | -2.62033800 |
| H | -2.18171400 | -0.90986700 | -2.81416500 |
| H | -3.08533500 | 0.43840000  | -3.52285000 |
| H | -1.68528100 | 0.75196600  | -2.47373500 |
| C | -4.80008300 | -0.58296400 | -1.72984300 |

---

|   |             |             |             |
|---|-------------|-------------|-------------|
| H | -5.29538800 | -0.10484800 | -2.58687600 |
| H | -4.62356100 | -1.62640700 | -2.00725900 |
| H | -5.51029500 | -0.56769700 | -0.89605700 |
| C | -3.87248200 | 1.66752400  | -1.27132400 |
| H | -4.65753400 | 1.84766700  | -0.53066900 |
| H | -3.00331200 | 2.27733500  | -1.00797600 |
| H | -4.25429000 | 2.02651300  | -2.23727600 |

Int<sub>EE</sub>(L2)

-----

M06-L electronic energy (Hartree): -2184.157387

M06-L thermal correction to free energy (Hartree): 0.571343

Three lowest frequencies (cm<sup>-1</sup>): 8.78, 26.35, 32.26

-----

|    |             |             |             |
|----|-------------|-------------|-------------|
| Pd | 0.12456500  | 1.51093400  | -0.14048800 |
| O  | -0.03190100 | 3.70936300  | -0.31633200 |
| O  | 1.88569100  | 2.70316000  | -0.76152700 |
| C  | 1.19400000  | 3.76805600  | -0.66371100 |
| C  | 1.81982700  | 5.10095400  | -0.93600600 |
| C  | -1.69772100 | 1.01130200  | 0.45501600  |
| C  | -2.82113100 | 0.78901900  | -0.30089800 |
| S  | -2.13164300 | 0.94085000  | 2.14054200  |
| C  | -4.01241800 | 0.57008100  | 0.46170900  |
| C  | -3.80202100 | 0.61087400  | 1.81282400  |
| H  | -4.52987300 | 0.50467000  | 2.60715800  |
| O  | -2.82715200 | 0.78190200  | -1.67792500 |
| C  | -3.99573600 | 0.13706500  | -2.19366800 |
| H  | -3.90894200 | -0.95210100 | -2.05097800 |
| O  | -5.22504400 | 0.32230900  | -0.11512200 |
| C  | -5.23701000 | 0.65059000  | -1.50959900 |
| H  | -6.13635000 | 0.18526600  | -1.92057800 |
| H  | -5.31373100 | 1.74135000  | -1.62846700 |
| H  | -4.01599400 | 0.35342100  | -3.26445500 |
| H  | 1.97644600  | 5.63151600  | 0.01013700  |
| H  | 2.78475100  | 4.99292600  | -1.43660000 |
| H  | 1.15388100  | 5.72016500  | -1.54436200 |
| C  | 3.44520200  | 0.29291500  | 3.75552200  |
| H  | 3.13303900  | 1.34926000  | 3.78074600  |
| H  | 4.13921900  | 0.15393600  | 4.59462500  |
| C  | 4.14546500  | 0.01169300  | 2.43171500  |
| H  | 5.00335600  | 0.68324700  | 2.29758300  |
| H  | 4.55103700  | -1.01292100 | 2.44327000  |
| C  | 2.21701200  | -0.59275000 | 3.92659200  |
| H  | 2.53161300  | -1.64574000 | 4.00817500  |

---

|   |             |             |             |
|---|-------------|-------------|-------------|
| H | 1.69212400  | -0.35215000 | 4.86012100  |
| C | 1.26390000  | -0.44996700 | 2.74540500  |
| H | 0.38044100  | -1.08906600 | 2.88552200  |
| H | 0.88740200  | 0.58639600  | 2.69566500  |
| C | 3.18871300  | 0.15391600  | 1.25236300  |
| H | 3.71462700  | -0.06086300 | 0.31219700  |
| H | 2.83760600  | 1.19533000  | 1.17579600  |
| C | 1.97526000  | -0.76585100 | 1.42379800  |
| H | 2.33082200  | -1.81074000 | 1.45375500  |
| P | 0.78721600  | -0.65354900 | 0.01272000  |
| C | 3.90170300  | -1.73620800 | -3.36800800 |
| H | 4.75893300  | -1.34792900 | -2.79454000 |
| H | 4.30619200  | -2.10946000 | -4.31781400 |
| C | 2.91088300  | -0.60568000 | -3.61633700 |
| H | 3.39102000  | 0.21923700  | -4.15863500 |
| H | 2.09828500  | -0.97283200 | -4.26385300 |
| C | 3.24925500  | -2.86873400 | -2.58580300 |
| H | 2.44587900  | -3.31668900 | -3.19212500 |
| H | 3.97150200  | -3.67053100 | -2.38448800 |
| C | 2.65991000  | -2.36699500 | -1.27081600 |
| H | 2.18312800  | -3.19443800 | -0.72944200 |
| H | 3.47641300  | -2.00495300 | -0.62660100 |
| C | 2.31253900  | -0.08759300 | -2.31297100 |
| H | 1.57174400  | 0.69846200  | -2.51047000 |
| H | 3.09880000  | 0.38900000  | -1.70869900 |
| C | 1.66242600  | -1.22787000 | -1.52161500 |
| H | 0.84722100  | -1.62502800 | -2.14926200 |
| C | -2.24429500 | -4.29102600 | 0.28115100  |
| H | -1.74614000 | -4.96285600 | -0.43601600 |
| H | -3.14339300 | -4.81830500 | 0.62562100  |
| C | -2.62368200 | -2.99967200 | -0.43615100 |
| H | -3.24606200 | -3.21959500 | -1.31438700 |
| H | -3.23295800 | -2.36515500 | 0.22988200  |
| C | -1.30245300 | -4.03018800 | 1.45152300  |
| H | -1.83255300 | -3.45406900 | 2.22762600  |
| H | -0.99914300 | -4.97609400 | 1.91876900  |
| C | -0.06644400 | -3.24152400 | 1.02066700  |
| H | 0.58556000  | -3.06963100 | 1.88707200  |
| H | 0.51449700  | -3.83903700 | 0.30168100  |
| C | -1.37974500 | -2.22177300 | -0.85341600 |
| H | -1.65043900 | -1.29430200 | -1.37572900 |
| H | -0.80128700 | -2.83153600 | -1.56638000 |
| C | -0.51303800 | -1.92492700 | 0.37460200  |
| H | -1.15579300 | -1.40961500 | 1.10537400  |

---

Pre-TS<sub>EE</sub>(L2)

-----  
M06-L electronic energy (Hartree): -2965.076060

M06-L thermal correction to free energy (Hartree): 0.681996

Three lowest frequencies (cm<sup>-1</sup>): 11.62, 26.42, 30.08  
-----

|    |             |             |             |
|----|-------------|-------------|-------------|
| Pd | -0.09626300 | -0.99495100 | -0.01393100 |
| O  | 0.76924300  | -3.51724300 | -1.38847200 |
| O  | 1.16365900  | -2.63261400 | 0.64295600  |
| C  | 1.30148500  | -3.54234900 | -0.26356300 |
| C  | 2.21679700  | -4.68272000 | 0.13222900  |
| C  | -1.39185900 | 0.40811400  | -0.59843600 |
| C  | -2.14239300 | 1.30684400  | 0.11639000  |
| S  | -1.76953400 | 0.59593800  | -2.29010800 |
| C  | -3.00796300 | 2.12515500  | -0.67769700 |
| C  | -2.91269600 | 1.87139900  | -2.02004200 |
| H  | -3.47320600 | 2.32383400  | -2.82857400 |
| O  | -2.06800100 | 1.43529300  | 1.48755100  |
| C  | -2.71290800 | 2.62260400  | 1.95375300  |
| H  | -2.06548300 | 3.49491800  | 1.76808700  |
| O  | -3.85167500 | 3.05144800  | -0.13216700 |
| C  | -4.04137500 | 2.81989900  | 1.26897600  |
| H  | -4.56069600 | 3.70077900  | 1.65377400  |
| H  | -4.67973400 | 1.93358300  | 1.41178200  |
| H  | -2.83592200 | 2.49829200  | 3.03267200  |
| C  | -3.81501100 | -1.58131000 | 0.94013000  |
| C  | -3.05061200 | -2.17561900 | -0.09841600 |
| C  | -3.20613400 | -1.68720900 | 2.16492500  |
| C  | -1.79781900 | -2.61844000 | 0.31804700  |
| S  | -1.67802000 | -2.45546900 | 2.06426600  |
| O  | -5.01135900 | -0.97721500 | 0.71709900  |
| C  | -5.18997200 | -0.69277500 | -0.68159300 |
| O  | -3.49079300 | -2.29179300 | -1.36142700 |
| C  | -4.87230500 | -1.90250500 | -1.51822700 |
| H  | -3.55374100 | -1.26255200 | 3.09926100  |
| H  | -6.23596800 | -0.40148400 | -0.79820100 |
| H  | -4.54157200 | 0.14966200  | -0.96523000 |
| H  | -4.99928600 | -1.69254800 | -2.58234700 |
| H  | -1.21398400 | -3.37434400 | -0.20013200 |
| H  | 3.25918300  | -4.33657700 | 0.11588800  |
| H  | 2.01170100  | -5.01935800 | 1.15364100  |
| H  | 2.12572700  | -5.52484800 | -0.55878600 |
| H  | -5.50395400 | -2.75561400 | -1.23925100 |

---

|   |             |             |             |
|---|-------------|-------------|-------------|
| C | 4.52448500  | -2.13263400 | -2.60617900 |
| H | 3.89322900  | -3.02058300 | -2.43457700 |
| H | 5.35156400  | -2.45655900 | -3.25161000 |
| C | 5.05541400  | -1.62878700 | -1.27044800 |
| H | 5.63994700  | -2.40959500 | -0.76530700 |
| H | 5.74723400  | -0.78983300 | -1.45005800 |
| C | 3.69249200  | -1.05783700 | -3.29423000 |
| H | 4.33705400  | -0.19838400 | -3.54185200 |
| H | 3.28784400  | -1.42780400 | -4.24540800 |
| C | 2.55443100  | -0.59589800 | -2.39323800 |
| H | 1.95888000  | 0.18321000  | -2.89340800 |
| H | 1.86630700  | -1.43640000 | -2.20461400 |
| C | 3.92839900  | -1.16426900 | -0.35300600 |
| H | 4.35141500  | -0.77780200 | 0.58294700  |
| H | 3.29725800  | -2.01610100 | -0.07462300 |
| C | 3.07308000  | -0.09391800 | -1.03743300 |
| H | 3.72215700  | 0.78204000  | -1.20631800 |
| P | 1.62593400  | 0.53489900  | -0.06369600 |
| C | 3.87653400  | 0.92366500  | 4.05944800  |
| H | 4.70224400  | 0.26575000  | 3.74295400  |
| H | 4.10246300  | 1.23257300  | 5.08847300  |
| C | 2.56774400  | 0.14438600  | 4.01048000  |
| H | 2.61692400  | -0.73763600 | 4.66243000  |
| H | 1.75602600  | 0.77767500  | 4.40410500  |
| C | 3.82408200  | 2.13724600  | 3.14017900  |
| H | 3.04995600  | 2.83424500  | 3.50034700  |
| H | 4.77399800  | 2.68720000  | 3.16468500  |
| C | 3.49662600  | 1.73361700  | 1.70575400  |
| H | 3.43029500  | 2.62594500  | 1.06845500  |
| H | 4.32056000  | 1.12737200  | 1.30008200  |
| C | 2.22274200  | -0.28179200 | 2.58748900  |
| H | 1.25124300  | -0.79482200 | 2.55585100  |
| H | 2.96109300  | -1.01511800 | 2.23256000  |
| C | 2.18779500  | 0.93481700  | 1.65573900  |
| H | 1.38559300  | 1.59026700  | 2.03541200  |
| C | 1.10717200  | 5.07419600  | -1.40351400 |
| H | 1.87834500  | 5.49578400  | -0.73853800 |
| H | 0.67250500  | 5.92167200  | -1.94964300 |
| C | 0.04800100  | 4.38036300  | -0.55649200 |
| H | -0.38220700 | 5.07857100  | 0.17450200  |
| H | -0.78428400 | 4.04389900  | -1.19725700 |
| C | 1.76089700  | 4.09927500  | -2.37449400 |
| H | 1.01075700  | 3.76108700  | -3.10783000 |
| H | 2.55286100  | 4.59773500  | -2.94862000 |

---

|   |             |            |             |
|---|-------------|------------|-------------|
| C | 2.33277500  | 2.87132300 | -1.66656200 |
| H | 2.75929900  | 2.19306400 | -2.41638800 |
| H | 3.16370100  | 3.17487700 | -1.00996500 |
| C | 0.63582400  | 3.17052500 | 0.15954400  |
| H | -0.12462700 | 2.67918600 | 0.77777000  |
| H | 1.42832700  | 3.51123800 | 0.84608600  |
| C | 1.22998300  | 2.18237200 | -0.85253600 |
| H | 0.42609600  | 1.93084000 | -1.55968400 |

TS<sub>EE</sub>(L2)

-----  
M06-L electronic energy (Hartree): -2965.047137

M06-L thermal correction to free energy (Hartree): 0.674923

Three lowest frequencies (cm<sup>-1</sup>): -596.18, 2.31, 27.41

-----

|    |             |             |             |
|----|-------------|-------------|-------------|
| Pd | 0.12031700  | -0.79837500 | -0.13251400 |
| O  | 0.58911400  | -3.91363200 | 0.43503500  |
| O  | -0.92021700 | -2.67663800 | -0.68341400 |
| C  | -0.55659500 | -3.74724100 | -0.14945300 |
| C  | -1.47847400 | -4.92492200 | -0.12629500 |
| C  | 1.18473500  | 0.78238800  | 0.47045600  |
| C  | 2.13062100  | 1.46114100  | -0.25392200 |
| S  | 1.29670000  | 1.29700400  | 2.13016500  |
| C  | 2.93308000  | 2.36702700  | 0.50450600  |
| C  | 2.60260000  | 2.39724500  | 1.83268800  |
| H  | 3.02021200  | 3.01863200  | 2.61518500  |
| O  | 2.31927300  | 1.27696000  | -1.60529100 |
| C  | 3.06108000  | 2.35049900  | -2.18082400 |
| H  | 2.42510300  | 3.24782000  | -2.25007100 |
| O  | 3.93002200  | 3.12147600  | -0.05553600 |
| C  | 4.28926700  | 2.65092900  | -1.35923800 |
| H  | 4.88966300  | 3.44397400  | -1.81222700 |
| H  | 4.90850100  | 1.74409300  | -1.26758800 |
| H  | 3.33278400  | 2.03007900  | -3.19050400 |
| C  | 4.32711400  | -1.47020200 | -0.69125100 |
| C  | 3.21214300  | -1.49366900 | 0.19352300  |
| C  | 3.99080900  | -1.82430600 | -1.97228900 |
| C  | 1.99025300  | -1.82685500 | -0.37782800 |
| S  | 2.30703100  | -2.15227900 | -2.08170000 |
| O  | 5.58748400  | -1.12041900 | -0.29303200 |
| C  | 5.55415300  | -0.40459300 | 0.94754500  |
| O  | 3.33887800  | -1.20773500 | 1.51616100  |
| C  | 4.69940700  | -1.12638500 | 1.95595200  |
| H  | 4.65612600  | -1.91505900 | -2.82342400 |

---

|   |             |             |             |
|---|-------------|-------------|-------------|
| H | 6.59025800  | -0.33283700 | 1.28579900  |
| H | 5.16028800  | 0.60980600  | 0.77697900  |
| H | 4.67445600  | -0.58755200 | 2.90713500  |
| H | 1.20831100  | -2.99888200 | 0.20810200  |
| H | -1.92653500 | -5.00210000 | 0.87210900  |
| H | -2.28259300 | -4.80103600 | -0.85441400 |
| H | -0.93573100 | -5.85556200 | -0.31105900 |
| H | 5.08651900  | -2.14075100 | 2.12873800  |
| C | -3.14897000 | -1.56320700 | 4.08892400  |
| H | -2.18309900 | -2.08166000 | 4.20155700  |
| H | -3.75060500 | -1.83325000 | 4.96663600  |
| C | -3.82164800 | -2.04420300 | 2.80853100  |
| H | -3.94603400 | -3.13540500 | 2.82400700  |
| H | -4.83461100 | -1.61546900 | 2.73940200  |
| C | -2.90376500 | -0.05954500 | 4.05301700  |
| H | -3.87103900 | 0.46832900  | 4.05231800  |
| H | -2.37325300 | 0.26682500  | 4.95714800  |
| C | -2.11709300 | 0.35269500  | 2.81243400  |
| H | -1.96121000 | 1.44075900  | 2.80882300  |
| H | -1.11250300 | -0.10322900 | 2.83969100  |
| C | -3.01715700 | -1.62997900 | 1.58254800  |
| H | -3.48625700 | -2.00251500 | 0.65998900  |
| H | -2.01996500 | -2.09807600 | 1.62413800  |
| C | -2.82791600 | -0.10955500 | 1.53749200  |
| H | -3.82194700 | 0.36691900  | 1.50663700  |
| P | -1.90826300 | 0.40204000  | 0.01216500  |
| C | -5.23508100 | -0.84490600 | -3.15346700 |
| H | -5.52089000 | -1.77603000 | -2.63789200 |
| H | -5.86931500 | -0.77722400 | -4.04714800 |
| C | -3.76392400 | -0.92130700 | -3.54364400 |
| H | -3.57793700 | -1.79539400 | -4.18174000 |
| H | -3.50241100 | -0.03571600 | -4.14544500 |
| C | -5.49247700 | 0.33563700  | -2.22543900 |
| H | -5.30117600 | 1.27606900  | -2.76737700 |
| H | -6.54564500 | 0.36407700  | -1.91626100 |
| C | -4.59390900 | 0.28336100  | -0.99424100 |
| H | -4.79821300 | 1.14443900  | -0.34515700 |
| H | -4.84047800 | -0.61442400 | -0.40518500 |
| C | -2.86306900 | -0.97303800 | -2.31494200 |
| H | -1.80439500 | -1.01018800 | -2.60816000 |
| H | -3.05030300 | -1.90015300 | -1.75338800 |
| C | -3.11642800 | 0.23296400  | -1.40579700 |
| H | -2.91566900 | 1.13524800  | -2.00939000 |
| C | -1.81900700 | 5.11583400  | -0.38156700 |

---

|   |             |            |             |
|---|-------------|------------|-------------|
| H | -2.50153700 | 5.19364100 | -1.24315800 |
| H | -1.51384500 | 6.14159100 | -0.13584700 |
| C | -0.61011300 | 4.27884500 | -0.78583200 |
| H | -0.11909400 | 4.71656000 | -1.66549100 |
| H | 0.13651300  | 4.28628100 | 0.02559200  |
| C | -2.57014800 | 4.49116300 | 0.78970700  |
| H | -1.93487000 | 4.51872700 | 1.69000400  |
| H | -3.46899000 | 5.07592700 | 1.02618200  |
| C | -2.94890800 | 3.03948300 | 0.50262800  |
| H | -3.48344300 | 2.60956900 | 1.36219100  |
| H | -3.64670700 | 3.01054300 | -0.35016600 |
| C | -1.01037900 | 2.83470800 | -1.06904500 |
| H | -0.13647300 | 2.23830000 | -1.36137900 |
| H | -1.70885900 | 2.81975700 | -1.92176300 |
| C | -1.69426200 | 2.23147500 | 0.16370500  |
| H | -0.98551000 | 2.33460900 | 1.00072700  |

Post-TS<sub>EE</sub>(L2)

-----  
M06-L electronic energy (Hartree): -2965.051312

M06-L thermal correction to free energy (Hartree): 0.678866

Three lowest frequencies (cm<sup>-1</sup>): 14.15, 20.57, 32.32

-----

|    |             |             |             |
|----|-------------|-------------|-------------|
| Pd | 0.22348500  | -0.72863300 | -0.11643200 |
| O  | 0.74749500  | -3.83556300 | 0.67508200  |
| O  | -0.68071400 | -2.71278100 | -0.65334100 |
| C  | -0.34766800 | -3.74294200 | -0.05389100 |
| C  | -1.18104900 | -4.97735800 | -0.06993600 |
| C  | 1.15807500  | 0.93658500  | 0.45154100  |
| C  | 2.01877200  | 1.70778500  | -0.28474800 |
| S  | 1.20372000  | 1.48444500  | 2.10297400  |
| C  | 2.68937900  | 2.72996400  | 0.45510400  |
| C  | 2.35686200  | 2.74024500  | 1.78299100  |
| H  | 2.68156200  | 3.43082500  | 2.55137400  |
| O  | 2.24086000  | 1.52279700  | -1.63268900 |
| C  | 2.79518900  | 2.69351700  | -2.23087000 |
| H  | 2.02413000  | 3.47758400  | -2.30424200 |
| O  | 3.55523500  | 3.61780200  | -0.12350300 |
| C  | 3.96844400  | 3.19813900  | -1.42811800 |
| H  | 4.42494100  | 4.07429200  | -1.89648100 |
| H  | 4.72906400  | 2.40740600  | -1.33702100 |
| H  | 3.10408000  | 2.40710000  | -3.23967100 |
| C  | 4.48668400  | -1.62801600 | -0.64074100 |
| C  | 3.36470100  | -1.30624500 | 0.18360400  |

---

|   |             |             |             |
|---|-------------|-------------|-------------|
| C | 4.12587900  | -2.11604700 | -1.86798700 |
| C | 2.12605900  | -1.53428300 | -0.38313300 |
| S | 2.40482700  | -2.17112700 | -1.99426500 |
| O | 5.78166100  | -1.46751000 | -0.23102200 |
| C | 5.86986400  | -0.58683700 | 0.89400300  |
| O | 3.52634600  | -0.80412000 | 1.44581100  |
| C | 4.85559800  | -0.96358200 | 1.94237400  |
| H | 4.77757000  | -2.46734700 | -2.65925900 |
| H | 6.89024400  | -0.67962200 | 1.27364500  |
| H | 5.70341300  | 0.45046500  | 0.56445000  |
| H | 4.93001700  | -0.31065000 | 2.81647300  |
| H | 1.27046200  | -2.98188600 | 0.52977600  |
| H | -1.62419600 | -5.12210600 | 0.92257700  |
| H | -1.98210800 | -4.88705200 | -0.80482900 |
| H | -0.56922400 | -5.85880000 | -0.27997600 |
| H | 5.01130800  | -2.00545900 | 2.26140100  |
| C | -3.13805900 | -1.72618600 | 4.05805600  |
| H | -2.14216600 | -2.17599500 | 4.20029100  |
| H | -3.74346200 | -2.03381600 | 4.92070900  |
| C | -3.74037700 | -2.25910700 | 2.76303400  |
| H | -3.78816800 | -3.35621400 | 2.78222200  |
| H | -4.77873300 | -1.90303200 | 2.66511000  |
| C | -2.99679100 | -0.20922200 | 4.02032400  |
| H | -3.99780000 | 0.25094200  | 3.99154200  |
| H | -2.51445800 | 0.15620000  | 4.93645800  |
| C | -2.20894400 | 0.25176100  | 2.79795300  |
| H | -2.12870600 | 1.34790300  | 2.79159000  |
| H | -1.17575400 | -0.13286300 | 2.85385100  |
| C | -2.93645100 | -1.79283000 | 1.55522200  |
| H | -3.35669500 | -2.19966400 | 0.62302600  |
| H | -1.90889600 | -2.18691700 | 1.62553200  |
| C | -2.85428700 | -0.26353100 | 1.50785200  |
| H | -3.87879300 | 0.14011700  | 1.45089400  |
| P | -1.93391300 | 0.31068700  | 0.00705200  |
| C | -5.04835700 | -1.20646200 | -3.25495800 |
| H | -5.28603400 | -2.15216900 | -2.74144900 |
| H | -5.64913700 | -1.19358700 | -4.17391200 |
| C | -3.56114300 | -1.17801800 | -3.58626600 |
| H | -3.28622700 | -2.04395800 | -4.20305300 |
| H | -3.34123300 | -0.28318200 | -4.19089700 |
| C | -5.43000600 | -0.04017400 | -2.35237400 |
| H | -5.28842000 | 0.90655500  | -2.89833500 |
| H | -6.49387700 | -0.08783600 | -2.08473000 |
| C | -4.57837000 | -0.01087300 | -1.08627100 |

---

|   |             |             |             |
|---|-------------|-------------|-------------|
| H | -4.87170000 | 0.83817500  | -0.45554700 |
| H | -4.77816200 | -0.91931400 | -0.49568900 |
| C | -2.70953000 | -1.14592400 | -2.32193200 |
| H | -1.63983200 | -1.11041400 | -2.57353100 |
| H | -2.85340600 | -2.07712400 | -1.75370300 |
| C | -3.08690600 | 0.04798100  | -1.44129400 |
| H | -2.93205300 | 0.95533300  | -2.05039900 |
| C | -2.25366500 | 5.02537900  | -0.31638700 |
| H | -2.95495600 | 5.05671200  | -1.16583500 |
| H | -2.03327200 | 6.06970800  | -0.05870100 |
| C | -0.98339300 | 4.30243300  | -0.75358500 |
| H | -0.54656100 | 4.79353100  | -1.63381100 |
| H | -0.22664400 | 4.36269900  | 0.04614900  |
| C | -2.92765200 | 4.31906700  | 0.85423300  |
| H | -2.27959000 | 4.38235500  | 1.74363500  |
| H | -3.86688000 | 4.82341100  | 1.11767500  |
| C | -3.18952000 | 2.84745400  | 0.54347000  |
| H | -3.67786400 | 2.36166700  | 1.40043700  |
| H | -3.89194600 | 2.77551700  | -0.30283100 |
| C | -1.26123900 | 2.83245700  | -1.05328500 |
| H | -0.34262000 | 2.31674600  | -1.36286400 |
| H | -1.96463300 | 2.76983700  | -1.89963300 |
| C | -1.87537500 | 2.15285700  | 0.17577000  |
| H | -1.16833300 | 2.30474400  | 1.00708300  |

Int<sub>EE</sub>(L3)

-----  
M06-L electronic energy (Hartree): -2416.450640

M06-L thermal correction to free energy (Hartree): 0.681931

Three lowest frequencies (cm<sup>-1</sup>): 19.97, 26.91, 37.01

-----

|   |             |            |             |
|---|-------------|------------|-------------|
| P | -0.41497800 | 0.00849600 | 0.34778600  |
| C | -1.26825700 | 1.68456500 | 0.41298200  |
| C | -2.47489100 | 1.72113300 | -0.54345200 |
| C | -1.72877800 | 2.08612200 | 1.82772700  |
| C | -0.23460600 | 2.73264800 | -0.06219500 |
| H | -3.23939700 | 1.00362200 | -0.21300100 |
| H | -2.16265600 | 1.42456200 | -1.55421500 |
| C | -3.09258300 | 3.12340300 | -0.56653400 |
| H | -0.86605800 | 2.10780500 | 2.50915700  |
| H | -2.44429800 | 1.35314200 | 2.22857200  |
| C | -2.36964800 | 3.48082600 | 1.79793100  |
| H | 0.12352600  | 2.46730800 | -1.06963200 |
| H | 0.64795900  | 2.72093200 | 0.59653300  |

---

|   |             |             |             |
|---|-------------|-------------|-------------|
| C | -0.86061700 | 4.13060800  | -0.08025400 |
| H | -3.94890600 | 3.11748100  | -1.25581200 |
| C | -3.56469300 | 3.48672500  | 0.84296000  |
| C | -2.05104000 | 4.13781200  | -1.04180100 |
| H | -2.70321700 | 3.73063100  | 2.81513100  |
| C | -1.33234400 | 4.50179800  | 1.32670200  |
| H | -0.10225800 | 4.84962500  | -0.42134200 |
| H | -4.32575900 | 2.76796200  | 1.18342900  |
| H | -4.03862100 | 4.47957300  | 0.84158100  |
| H | -1.71622500 | 3.88659800  | -2.05990100 |
| H | -2.49468400 | 5.14356100  | -1.08756700 |
| H | -1.76895400 | 5.51159000  | 1.32540200  |
| H | -0.47785800 | 4.52194800  | 2.02009700  |
| C | -1.59677600 | -1.45101800 | 0.39485300  |
| C | -0.72949700 | -2.69835000 | 0.68176200  |
| C | -2.70678700 | -1.33875600 | 1.45903000  |
| C | -2.25043100 | -1.66204300 | -0.98967900 |
| H | -0.21261600 | -2.60201600 | 1.64652800  |
| H | 0.05382400  | -2.78129900 | -0.08884700 |
| C | -1.59630200 | -3.96060700 | 0.69217400  |
| H | -3.34837200 | -0.47060600 | 1.24768700  |
| H | -2.27967400 | -1.18158800 | 2.45783700  |
| C | -3.56023900 | -2.61460500 | 1.45880100  |
| H | -1.46276500 | -1.75770000 | -1.75348200 |
| H | -2.85490700 | -0.79174200 | -1.27372100 |
| C | -3.12372400 | -2.92156600 | -0.98138900 |
| H | -0.95412200 | -4.82406800 | 0.91624400  |
| C | -2.67578600 | -3.82580800 | 1.76845900  |
| C | -2.25399600 | -4.14255600 | -0.67658300 |
| H | -4.33656500 | -2.51357000 | 2.23033200  |
| C | -4.21219300 | -2.78937400 | 0.08577900  |
| H | -3.58638500 | -3.03152400 | -1.97242900 |
| H | -2.21087200 | -3.71213500 | 2.75987600  |
| H | -3.28804200 | -4.73892100 | 1.80431400  |
| H | -1.48403500 | -4.26388200 | -1.45333100 |
| H | -2.86639800 | -5.05647200 | -0.68362500 |
| H | -4.85428100 | -3.68263300 | 0.08299700  |
| H | -4.85922000 | -1.92744000 | -0.13758400 |
| C | 0.63488000  | -0.07318100 | 1.86193900  |
| C | 0.06621900  | -0.36656800 | 3.25047700  |
| H | 1.15998000  | 0.89472200  | 1.86740700  |
| H | 1.41583700  | -0.81072400 | 1.64061200  |
| C | 1.11279500  | -0.08734400 | 4.32366000  |
| H | -0.83540000 | 0.21974300  | 3.46616400  |

---

|    |             |             |             |
|----|-------------|-------------|-------------|
| H  | -0.23987000 | -1.42060500 | 3.31631300  |
| C  | 0.64159100  | -0.46506900 | 5.71601700  |
| H  | 2.03723700  | -0.63246500 | 4.07658500  |
| H  | 1.37860300  | 0.98082800  | 4.29320500  |
| H  | 1.40475400  | -0.25337100 | 6.47318400  |
| H  | -0.26371700 | 0.08998100  | 5.99284700  |
| H  | 0.40143700  | -1.53411100 | 5.77674000  |
| Pd | 0.68214900  | -0.10210300 | -1.64760400 |
| O  | 1.28910700  | -0.10819300 | -3.77672100 |
| O  | -0.74791400 | 0.54225800  | -3.21529400 |
| C  | 0.13337100  | 0.31395100  | -4.10803100 |
| C  | -0.20201700 | 0.51052700  | -5.55409400 |
| C  | 2.32995600  | -0.69698500 | -0.73049900 |
| C  | 3.26216200  | 0.04015800  | -0.04536400 |
| S  | 2.86643500  | -2.35205800 | -0.80105700 |
| C  | 4.39601700  | -0.70678400 | 0.40274900  |
| C  | 4.32822800  | -2.03416500 | 0.07562000  |
| H  | 5.06092300  | -2.80879700 | 0.26361500  |
| O  | 3.12492200  | 1.38403000  | 0.22091500  |
| C  | 3.97944800  | 1.78891600  | 1.29314000  |
| H  | 3.58653800  | 1.39988600  | 2.24689400  |
| O  | 5.42691100  | -0.14379700 | 1.09990200  |
| C  | 5.38433800  | 1.28795000  | 1.07241500  |
| H  | 6.05575900  | 1.62416500  | 1.86648500  |
| H  | 5.76706700  | 1.64738800  | 0.10590700  |
| H  | 3.94589000  | 2.88094700  | 1.31544100  |
| H  | -0.98163300 | 1.26638600  | -5.67834100 |
| H  | 0.68521600  | 0.79016800  | -6.12817000 |
| H  | -0.58095900 | -0.43121900 | -5.96841500 |

Pre-TS<sub>EE</sub>(L3)

-----

M06-L electronic energy (Hartree): -3197.371079

M06-L thermal correction to free energy (Hartree): 0.782955

Three lowest frequencies (cm<sup>-1</sup>): 19.44, 24.08, 35.58

-----

|   |            |             |             |
|---|------------|-------------|-------------|
| P | 1.22078200 | 0.39536000  | -0.08168900 |
| C | 2.00863300 | 0.39319300  | 1.64098200  |
| C | 2.89768700 | -0.84360300 | 1.87895700  |
| C | 2.84040200 | 1.66191400  | 1.91770400  |
| C | 0.84163800 | 0.36343900  | 2.65544800  |
| H | 3.75620200 | -0.83204200 | 1.19250200  |
| H | 2.32334100 | -1.75532400 | 1.67761300  |
| C | 3.42031900 | -0.85227700 | 3.32047000  |

---

|   |            |             |             |
|---|------------|-------------|-------------|
| H | 2.21600200 | 2.55821900  | 1.79200400  |
| H | 3.67446800 | 1.74196100  | 1.20464600  |
| C | 3.38414600 | 1.64145300  | 3.35349100  |
| H | 0.22722600 | -0.53185900 | 2.48168100  |
| H | 0.18397800 | 1.23370900  | 2.49719800  |
| C | 1.37589100 | 0.35739600  | 4.09094600  |
| H | 4.04314600 | -1.74792500 | 3.45881500  |
| C | 4.25800500 | 0.40402100  | 3.56399100  |
| C | 2.24249300 | -0.88724000 | 4.29677000  |
| H | 3.98088600 | 2.55150200  | 3.51036000  |
| C | 2.21271500 | 1.61389700  | 4.33732900  |
| H | 0.52201300 | 0.33575200  | 4.78353000  |
| H | 5.11693800 | 0.42410900  | 2.87567500  |
| H | 4.66501000 | 0.40059700  | 4.58632300  |
| H | 1.64291100 | -1.79599200 | 4.13130300  |
| H | 2.61031100 | -0.92648400 | 5.33317500  |
| H | 2.58810100 | 1.62376700  | 5.37160500  |
| H | 1.59129200 | 2.51361800  | 4.21176000  |
| C | 2.39630900 | -0.15589700 | -1.43480300 |
| C | 1.73005600 | 0.21679000  | -2.77825100 |
| C | 3.79335200 | 0.49207800  | -1.36208100 |
| C | 2.54583000 | -1.69029300 | -1.41423300 |
| H | 1.56708100 | 1.30179700  | -2.84764000 |
| H | 0.73609700 | -0.25627200 | -2.83208700 |
| C | 2.59973000 | -0.24633600 | -3.95182900 |
| H | 4.29196900 | 0.22282300  | -0.42034100 |
| H | 3.71880200 | 1.58671400  | -1.37936100 |
| C | 4.64994500 | 0.01715600  | -2.54371100 |
| H | 1.55000000 | -2.15018600 | -1.48725300 |
| H | 2.98065400 | -2.02638900 | -0.46399400 |
| C | 3.42298900 | -2.15879700 | -2.57979300 |
| H | 2.10774200 | 0.04692100  | -4.89021100 |
| C | 3.97569600 | 0.41835000  | -3.85808300 |
| C | 2.76089900 | -1.76690200 | -3.90190200 |
| H | 5.63770800 | 0.49437200  | -2.47206000 |
| C | 4.80318600 | -1.50439100 | -2.48408400 |
| H | 3.52326800 | -3.25272200 | -2.52265800 |
| H | 3.87282200 | 1.51324100  | -3.91147600 |
| H | 4.60018000 | 0.11286100  | -4.71078600 |
| H | 1.77855600 | -2.25480600 | -3.99195000 |
| H | 3.37122200 | -2.11032700 | -4.75064600 |
| H | 5.44532300 | -1.85175500 | -3.30728000 |
| H | 5.29763400 | -1.79690900 | -1.54495600 |
| C | 0.79856900 | 2.16433600  | -0.41425600 |

---

|    |             |             |             |
|----|-------------|-------------|-------------|
| C  | 1.81973300  | 3.22887700  | -0.81513700 |
| H  | 0.26714900  | 2.47933100  | 0.49816200  |
| H  | 0.02225000  | 2.13525700  | -1.18690900 |
| C  | 1.18937500  | 4.61492700  | -0.72769900 |
| H  | 2.72489400  | 3.20419700  | -0.19648200 |
| H  | 2.15677200  | 3.05371300  | -1.84753000 |
| C  | 2.10694400  | 5.71434900  | -1.23053400 |
| H  | 0.24605400  | 4.61803200  | -1.29716200 |
| H  | 0.90571200  | 4.81070400  | 0.31833600  |
| H  | 1.63943200  | 6.70190700  | -1.14821500 |
| H  | 3.04321100  | 5.74186600  | -0.65861700 |
| H  | 2.37170100  | 5.55918300  | -2.28410700 |
| Pd | -0.66509900 | -0.97007900 | -0.01857000 |
| O  | -0.00498100 | -3.93553500 | -0.80595700 |
| O  | 0.40158500  | -2.58173800 | 0.94861300  |
| C  | 0.51704500  | -3.68913400 | 0.29661600  |
| C  | 1.41236500  | -4.71405700 | 0.96290300  |
| C  | -1.77130600 | 0.51561500  | -0.76672700 |
| C  | -2.35313400 | 1.56374500  | -0.09720000 |
| S  | -2.03413700 | 0.74292900  | -2.47197500 |
| C  | -3.01323200 | 2.51765400  | -0.93291600 |
| C  | -2.91710200 | 2.22161500  | -2.26772800 |
| H  | -3.36377700 | 2.74509600  | -3.10368800 |
| O  | -2.27122800 | 1.72399000  | 1.26924400  |
| C  | -2.63123400 | 3.04552200  | 1.67094200  |
| H  | -1.81034500 | 3.74399500  | 1.43767100  |
| O  | -3.67238800 | 3.60686100  | -0.43623100 |
| C  | -3.89292400 | 3.48870500  | 0.97393000  |
| H  | -4.21508300 | 4.47589800  | 1.31416400  |
| H  | -4.70056400 | 2.76246800  | 1.15851800  |
| H  | -2.76648000 | 3.00963200  | 2.75512500  |
| C  | -4.45863000 | -1.10461700 | 0.70221800  |
| C  | -3.66341800 | -1.84008600 | -0.21648800 |
| C  | -3.99205100 | -1.19722700 | 1.98855400  |
| C  | -2.51471200 | -2.38418200 | 0.35369700  |
| S  | -2.55518300 | -2.12573300 | 2.09152400  |
| O  | -5.55018000 | -0.39231400 | 0.31848300  |
| C  | -5.52301000 | -0.14953600 | -1.09860300 |
| O  | -3.97704900 | -1.98101100 | -1.51308800 |
| C  | -5.26643800 | -1.42673500 | -1.85254900 |
| H  | -4.38640400 | -0.68584500 | 2.85854900  |
| H  | -6.50159000 | 0.26261500  | -1.35318300 |
| H  | -4.74347500 | 0.59362600  | -1.32267500 |
| H  | -5.23695700 | -1.25167100 | -2.93008900 |

---

|   |             |             |             |
|---|-------------|-------------|-------------|
| H | -1.95746200 | -3.22451500 | -0.05718600 |
| H | 1.40040500  | -4.62011200 | 2.05330600  |
| H | 1.13639300  | -5.73179500 | 0.67280900  |
| H | 2.44596500  | -4.54382800 | 0.63261000  |
| H | -6.03339100 | -2.17895400 | -1.62870400 |

TS<sub>EE</sub>(L3)

-----  
M06-L electronic energy (Hartree): -3197.337914

M06-L thermal correction to free energy (Hartree): 0.777985

Three lowest frequencies (cm<sup>-1</sup>): -602.68, 14.74, 19.15  
-----

|   |             |             |             |
|---|-------------|-------------|-------------|
| P | -1.47263500 | -0.22951600 | 0.35464000  |
| C | -2.33300200 | 1.34002000  | 0.97439600  |
| C | -3.03867800 | 2.11023300  | -0.15909300 |
| C | -3.35383500 | 1.07654200  | 2.09898900  |
| C | -1.21290900 | 2.23940500  | 1.54978600  |
| H | -3.86258300 | 1.50897600  | -0.56923100 |
| H | -2.33490500 | 2.30132500  | -0.97756100 |
| C | -3.60804700 | 3.43307600  | 0.36788000  |
| H | -2.86766000 | 0.55905400  | 2.93851900  |
| H | -4.16283600 | 0.42338600  | 1.73871500  |
| C | -3.94100500 | 2.39838800  | 2.61270900  |
| H | -0.46940100 | 2.44969700  | 0.76541600  |
| H | -0.67943100 | 1.70864300  | 2.35614900  |
| C | -1.79313000 | 3.55420400  | 2.07990200  |
| H | -4.09693800 | 3.95851600  | -0.46519400 |
| C | -4.63013100 | 3.14270800  | 1.46803900  |
| C | -2.47586100 | 4.29651700  | 0.92859100  |
| H | -4.67054400 | 2.17121000  | 3.40330900  |
| C | -2.81417700 | 3.26331500  | 3.18149800  |
| H | -0.97258200 | 4.16491100  | 2.48305600  |
| H | -5.45681200 | 2.53762300  | 1.06506200  |
| H | -5.06932300 | 4.08099200  | 1.83891300  |
| H | -1.74390300 | 4.51984300  | 0.13684000  |
| H | -2.87346300 | 5.25982100  | 1.28173700  |
| H | -3.22318000 | 4.20532800  | 3.57643200  |
| H | -2.32763500 | 2.74633100  | 4.02252100  |
| C | -2.50866200 | -1.19088400 | -0.88167400 |
| C | -1.84443500 | -2.57855900 | -1.02794100 |
| C | -3.98823400 | -1.37068200 | -0.49206500 |
| C | -2.42637300 | -0.51267900 | -2.26746800 |
| H | -1.82950500 | -3.11154900 | -0.06685700 |
| H | -0.79299100 | -2.44272800 | -1.33054300 |

---

|    |             |             |             |
|----|-------------|-------------|-------------|
| C  | -2.58443300 | -3.42104700 | -2.07248800 |
| H  | -4.48224800 | -0.39256400 | -0.40468800 |
| H  | -4.07513800 | -1.85689400 | 0.48785300  |
| C  | -4.71177300 | -2.21315300 | -1.55043700 |
| H  | -1.36632200 | -0.41651800 | -2.55223700 |
| H  | -2.83587000 | 0.50534500  | -2.23389000 |
| C  | -3.17331500 | -1.34229900 | -3.31724200 |
| H  | -2.10034100 | -4.40599800 | -2.13672100 |
| C  | -4.04649000 | -3.58821300 | -1.64994000 |
| C  | -2.52188900 | -2.72153100 | -3.43158800 |
| H  | -5.76222100 | -2.32997100 | -1.24799800 |
| C  | -4.63839900 | -1.50175800 | -2.90342400 |
| H  | -3.11392800 | -0.82061500 | -4.28368500 |
| H  | -4.10458000 | -4.10677900 | -0.68046100 |
| H  | -4.57980100 | -4.21394600 | -2.38101100 |
| H  | -1.47559200 | -2.62036300 | -3.75745600 |
| H  | -3.03970800 | -3.32508300 | -4.19204600 |
| H  | -5.18432500 | -2.07860300 | -3.66484200 |
| H  | -5.12391600 | -0.51591700 | -2.83745500 |
| C  | -1.28574100 | -1.27624200 | 1.86843700  |
| C  | -2.42813800 | -2.09432800 | 2.46969500  |
| H  | -0.88954900 | -0.57791900 | 2.62420600  |
| H  | -0.44516400 | -1.94763600 | 1.65377600  |
| C  | -2.04578700 | -2.63833200 | 3.84130200  |
| H  | -3.35248800 | -1.51035900 | 2.56107800  |
| H  | -2.67353900 | -2.93856100 | 1.80861600  |
| C  | -3.12507800 | -3.51832800 | 4.44569200  |
| H  | -1.10383900 | -3.20155600 | 3.75740700  |
| H  | -1.83040500 | -1.79316800 | 4.51339200  |
| H  | -2.83657800 | -3.89419600 | 5.43372500  |
| H  | -4.06693200 | -2.96712000 | 4.56263200  |
| H  | -3.33200100 | -4.38710800 | 3.80785000  |
| Pd | 0.62526100  | 0.35784900  | -0.59106400 |
| O  | 1.19218000  | 1.53146600  | -3.49808000 |
| O  | -0.30458900 | 1.92199200  | -1.86834400 |
| C  | 0.07724000  | 2.02275000  | -3.05564500 |
| C  | -0.78766800 | 2.70664900  | -4.06543100 |
| C  | 1.60064700  | -1.00860800 | 0.48112300  |
| C  | 2.51311800  | -0.75518800 | 1.47245300  |
| S  | 1.67220200  | -2.70258500 | 0.08871100  |
| C  | 3.27662000  | -1.88905200 | 1.88654600  |
| C  | 2.93387600  | -3.04005400 | 1.22909400  |
| H  | 3.32281100  | -4.03967300 | 1.37701900  |
| O  | 2.71947700  | 0.49881000  | 2.00074500  |

---

|   |             |             |             |
|---|-------------|-------------|-------------|
| C | 3.48145600  | 0.45453900  | 3.20511900  |
| H | 2.84679800  | 0.11103800  | 4.03739700  |
| O | 4.25458700  | -1.81076000 | 2.84283500  |
| C | 4.67281100  | -0.45803100 | 3.05747900  |
| H | 5.28175200  | -0.46980200 | 3.96492500  |
| H | 5.29808200  | -0.12544900 | 2.21273600  |
| H | 3.79818100  | 1.48265500  | 3.40339900  |
| C | 4.86989700  | 1.03458000  | -0.75775900 |
| C | 3.73872400  | 0.33382600  | -1.26310300 |
| C | 4.57402600  | 2.32498600  | -0.39993500 |
| C | 2.54232600  | 1.04009300  | -1.27664400 |
| S | 2.90533600  | 2.64970600  | -0.65581800 |
| O | 6.10797100  | 0.46627900  | -0.63847700 |
| C | 6.02623600  | -0.96347100 | -0.68756800 |
| O | 3.82806400  | -0.94937000 | -1.70335400 |
| C | 5.17705700  | -1.40664100 | -1.84983100 |
| H | 5.25875400  | 3.07356400  | -0.01825700 |
| H | 7.05287900  | -1.32378600 | -0.78516000 |
| H | 5.59977900  | -1.34176400 | 0.25556700  |
| H | 5.11966600  | -2.49717700 | -1.90345800 |
| H | 1.78460400  | 1.19841600  | -2.59568200 |
| H | -1.52387700 | 3.34608200  | -3.57384600 |
| H | -0.19047700 | 3.28489700  | -4.77465200 |
| H | -1.32744100 | 1.94212300  | -4.63795300 |
| H | 5.59099200  | -1.02308300 | -2.79362800 |

Post-TS<sub>EE</sub>(L3)

-----

M06-L electronic energy (Hartree): -3196.742140

M06-L thermal correction to free energy (Hartree): 0.784155

Three lowest frequencies (cm<sup>-1</sup>): 11.88, 21.45, 25.83

-----

|   |             |             |             |
|---|-------------|-------------|-------------|
| P | -1.37389500 | 0.00425400  | 0.19474100  |
| C | -2.58276800 | -0.07506000 | -1.25722400 |
| C | -2.77462000 | -1.51120400 | -1.78172000 |
| C | -3.96921700 | 0.52464900  | -0.95611700 |
| C | -1.93259800 | 0.77190200  | -2.37608000 |
| H | -3.26187300 | -2.13435100 | -1.01835800 |
| H | -1.79947000 | -1.96191600 | -1.99614600 |
| C | -3.64131700 | -1.50993900 | -3.04576500 |
| H | -3.86144900 | 1.56338900  | -0.61167200 |
| H | -4.46552200 | -0.03528800 | -0.14904700 |
| C | -4.84440100 | 0.51122600  | -2.21637800 |
| H | -0.93328800 | 0.37162500  | -2.60598800 |

---

|   |             |             |             |
|---|-------------|-------------|-------------|
| H | -1.78117900 | 1.80482300  | -2.02226700 |
| C | -2.80445100 | 0.76795900  | -3.63423100 |
| H | -3.75166200 | -2.54723300 | -3.39460400 |
| C | -5.01601000 | -0.92350900 | -2.71755000 |
| C | -2.96581500 | -0.67053900 | -4.13172800 |
| H | -5.82600400 | 0.93805500  | -1.96458400 |
| C | -4.17879800 | 1.35523400  | -3.30557100 |
| H | -2.31463600 | 1.37698800  | -4.40768400 |
| H | -5.51453200 | -1.53629100 | -1.95075900 |
| H | -5.66019000 | -0.93700300 | -3.60954400 |
| H | -1.98172000 | -1.09789100 | -4.38078700 |
| H | -3.56684400 | -0.68751800 | -5.05338900 |
| H | -4.80965800 | 1.37388400  | -4.20701000 |
| H | -4.07384100 | 2.39687800  | -2.96551200 |
| C | -1.63318200 | -1.37667700 | 1.44015900  |
| C | -0.86274700 | -0.96303400 | 2.71602400  |
| C | -3.10352100 | -1.65766200 | 1.80026300  |
| C | -0.97843200 | -2.67869300 | 0.92787600  |
| H | -1.25147200 | -0.01845400 | 3.12020600  |
| H | 0.19486300  | -0.78279900 | 2.45974100  |
| C | -0.96623700 | -2.05631700 | 3.78329700  |
| H | -3.66099100 | -1.97170600 | 0.90676000  |
| H | -3.59037100 | -0.74598400 | 2.17078100  |
| C | -3.18503800 | -2.75875700 | 2.86412800  |
| H | 0.08072000  | -2.47758100 | 0.69353100  |
| H | -1.45137400 | -3.01307100 | -0.00567000 |
| C | -1.07806400 | -3.78210200 | 1.98727400  |
| H | -0.42951100 | -1.72263600 | 4.68289800  |
| C | -2.43911200 | -2.30559900 | 4.12182200  |
| C | -0.33601500 | -3.34340500 | 3.25233300  |
| H | -4.24225400 | -2.94104700 | 3.10454000  |
| C | -2.55029300 | -4.04045100 | 2.32090100  |
| H | -0.62159200 | -4.69849700 | 1.58515600  |
| H | -2.89629200 | -1.38769100 | 4.52299600  |
| H | -2.51949700 | -3.07310500 | 4.90607100  |
| H | 0.72895900  | -3.17687200 | 3.02738700  |
| H | -0.38546700 | -4.13466500 | 4.01523800  |
| H | -2.63239200 | -4.84779000 | 3.06385400  |
| H | -3.08991200 | -4.37504100 | 1.42151600  |
| C | -1.78434300 | 1.58890000  | 1.05673100  |
| C | -2.98496300 | 1.78391700  | 1.98106700  |
| H | -1.82723400 | 2.32593400  | 0.23839600  |
| H | -0.87598400 | 1.85563300  | 1.61154600  |
| C | -3.14200100 | 3.25635500  | 2.34547200  |

---

|    |             |             |             |
|----|-------------|-------------|-------------|
| H  | -3.91974800 | 1.41964600  | 1.53635200  |
| H  | -2.84870800 | 1.20318400  | 2.90514200  |
| C  | -4.23390100 | 3.49719400  | 3.37208800  |
| H  | -2.17882500 | 3.63879100  | 2.72064700  |
| H  | -3.35402700 | 3.83092400  | 1.43003600  |
| H  | -4.34102800 | 4.56155200  | 3.60999400  |
| H  | -5.20560600 | 3.13888200  | 3.00873800  |
| H  | -4.02015400 | 2.96764000  | 4.30936200  |
| Pd | 0.94697300  | -0.06853400 | -0.51691400 |
| O  | 2.32301900  | -2.96224900 | -1.60043100 |
| O  | 0.44399100  | -1.76548300 | -1.89969900 |
| C  | 1.09174500  | -2.80669400 | -2.05068400 |
| C  | 0.52190200  | -4.00795700 | -2.72008100 |
| C  | 1.37364900  | 1.54350000  | 0.55703200  |
| C  | 1.10511300  | 2.84164100  | 0.20731000  |
| S  | 2.08847900  | 1.53398800  | 2.14101100  |
| C  | 1.43134400  | 3.81047000  | 1.20700800  |
| C  | 1.96948800  | 3.25504400  | 2.33598400  |
| H  | 2.31147400  | 3.75544500  | 3.23330600  |
| O  | 0.52062100  | 3.19980000  | -0.99118300 |
| C  | -0.07280700 | 4.49592300  | -0.90958800 |
| H  | -0.99133600 | 4.44816500  | -0.30066500 |
| O  | 1.19761600  | 5.14874200  | 1.04856800  |
| C  | 0.89017100  | 5.48893500  | -0.30757800 |
| H  | 0.45708000  | 6.49215900  | -0.27547700 |
| H  | 1.81801300  | 5.52053100  | -0.89791800 |
| H  | -0.34203900 | 4.77587000  | -1.93142400 |
| C  | 5.31026600  | -0.41064800 | -0.80539200 |
| C  | 4.02121700  | -0.59973400 | -0.21274100 |
| C  | 5.24850400  | 0.21681700  | -2.01964600 |
| C  | 2.95545600  | -0.14634700 | -0.95900100 |
| S  | 3.59821000  | 0.56256100  | -2.41565600 |
| O  | 6.46862800  | -0.83800100 | -0.22115900 |
| C  | 6.28071800  | -1.17865700 | 1.15729500  |
| O  | 3.86919500  | -1.23253700 | 1.00104900  |
| C  | 5.02826500  | -1.99708900 | 1.34329500  |
| H  | 6.06829200  | 0.46266500  | -2.68385600 |
| H  | 7.17033400  | -1.74047100 | 1.45271800  |
| H  | 6.22350900  | -0.25830800 | 1.75727500  |
| H  | 4.90193900  | -2.29286900 | 2.38763700  |
| H  | 2.61538000  | -2.07990700 | -1.23132800 |
| H  | -0.30770100 | -3.72248800 | -3.37006800 |
| H  | 1.28353100  | -4.55062400 | -3.28420000 |
| H  | 0.13405900  | -4.68622400 | -1.94986800 |

---

|   |            |             |            |
|---|------------|-------------|------------|
| H | 5.07015900 | -2.90311500 | 0.71842000 |
|---|------------|-------------|------------|

Int<sub>EE</sub>(L4)

-----

M06-L electronic energy (Hartree): -2173.264906  
M06-L thermal correction to free energy (Hartree): 0.366013  
Three lowest frequencies (cm<sup>-1</sup>): 10.86, 33.63, 40.18

-----

|    |             |             |             |
|----|-------------|-------------|-------------|
| Pd | 0.50456100  | 1.53398700  | 0.26009900  |
| O  | 0.69137500  | 3.73629800  | 0.41477800  |
| O  | 2.42562900  | 2.51112700  | -0.19638900 |
| C  | 1.91305500  | 3.64906800  | 0.06070000  |
| C  | 2.74363900  | 4.89063000  | -0.03598300 |
| C  | -1.37219700 | 1.11227600  | 0.73688200  |
| C  | -2.42532300 | 0.98034300  | -0.13182300 |
| S  | -1.92016700 | 0.76784500  | 2.35265300  |
| C  | -3.66253200 | 0.63172900  | 0.49166700  |
| C  | -3.55322400 | 0.47167400  | 1.84699700  |
| H  | -4.33911400 | 0.25980600  | 2.56121700  |
| O  | -2.30797900 | 1.14405500  | -1.48935700 |
| C  | -3.41236900 | 0.55767200  | -2.18709300 |
| H  | -3.30414800 | -0.53724200 | -2.18686000 |
| O  | -4.81712300 | 0.44940200  | -0.21216100 |
| C  | -4.71981700 | 0.95591300  | -1.55042600 |
| H  | -5.56852400 | 0.53241500  | -2.09321900 |
| H  | -4.81900000 | 2.05106700  | -1.53284600 |
| H  | -3.35009900 | 0.92189600  | -3.21561200 |
| H  | 2.21758400  | 5.65695000  | -0.61381900 |
| H  | 2.90610600  | 5.30273200  | 0.96627300  |
| H  | 3.71445100  | 4.68669800  | -0.49332700 |
| C  | -0.56904000 | -1.68072400 | -0.76757600 |
| C  | -1.65705000 | -2.06608900 | 0.02931500  |
| C  | -0.54344900 | -2.05032600 | -2.11660900 |
| C  | -2.68942000 | -2.82348800 | -0.51207400 |
| H  | -1.69249300 | -1.77657600 | 1.07995500  |
| C  | -1.58181600 | -2.80764100 | -2.65547300 |
| H  | 0.29389800  | -1.75894100 | -2.74871600 |
| C  | -2.65263300 | -3.19900400 | -1.85524900 |
| H  | -3.52909700 | -3.11379100 | 0.11691400  |
| H  | -1.54789700 | -3.09616500 | -3.70392300 |
| H  | -3.46074500 | -3.79295600 | -2.27785400 |
| C  | 1.15167600  | -1.52319800 | 1.53526600  |
| C  | 1.08535700  | -2.91912100 | 1.64868900  |
| C  | 1.54443400  | -0.76009900 | 2.64134700  |

---

|   |            |             |             |
|---|------------|-------------|-------------|
| C | 1.41453900 | -3.53701500 | 2.85112800  |
| H | 0.76916700 | -3.52128500 | 0.79718300  |
| C | 1.87030900 | -1.38210300 | 3.84288100  |
| H | 1.57853000 | 0.32736800  | 2.55449500  |
| C | 1.80504800 | -2.76994800 | 3.94792500  |
| H | 1.36072700 | -4.62042400 | 2.93302300  |
| H | 2.16688100 | -0.78149100 | 4.69994400  |
| H | 2.05387400 | -3.25654100 | 4.88901100  |
| C | 2.18902400 | -0.90504400 | -1.13988800 |
| C | 2.29045800 | -0.04240800 | -2.24023900 |
| C | 3.14719300 | -1.90861100 | -0.95927500 |
| C | 3.32429000 | -0.19337000 | -3.15770100 |
| H | 1.55573500 | 0.75427400  | -2.36739400 |
| C | 4.18694600 | -2.04898300 | -1.87553900 |
| H | 3.08445000 | -2.57848300 | -0.10269900 |
| C | 4.27459700 | -1.19668300 | -2.97444300 |
| H | 3.39237600 | 0.47770100  | -4.01129800 |
| H | 4.93125600 | -2.82880600 | -1.72866900 |
| H | 5.08847100 | -1.31171200 | -3.68752100 |
| P | 0.76434000 | -0.67901100 | -0.02777900 |

Pre-TS<sub>EE</sub>(L4)

-----  
M06-L electronic energy (Hartree): -2954.186726

M06-L thermal correction to free energy (Hartree): 0.469515

Three lowest frequencies (cm<sup>-1</sup>): 15.66, 27.75, 35.26  
-----

|    |             |             |             |
|----|-------------|-------------|-------------|
| Pd | -0.01252800 | -1.02127400 | -0.08805300 |
| O  | -1.32573000 | -3.29790200 | 1.32683300  |
| O  | -1.28894200 | -2.60234300 | -0.81055300 |
| C  | -1.70592700 | -3.36503000 | 0.14285300  |
| C  | -2.75867500 | -4.36892900 | -0.27642800 |
| C  | 1.23679400  | 0.43108900  | 0.49119400  |
| C  | 1.96957000  | 1.27780700  | -0.30196600 |
| S  | 1.48007100  | 0.88066200  | 2.15642200  |
| C  | 2.72542800  | 2.25879800  | 0.41286100  |
| C  | 2.55857900  | 2.18376500  | 1.77072700  |
| H  | 3.03610800  | 2.77957600  | 2.53864600  |
| O  | 1.97351300  | 1.20510100  | -1.67477400 |
| C  | 2.53840700  | 2.37246300  | -2.27471300 |
| H  | 1.80915300  | 3.19633600  | -2.24578400 |
| O  | 3.52375300  | 3.17245900  | -0.21445600 |
| C  | 3.80424600  | 2.78097400  | -1.56452100 |
| H  | 4.26828800  | 3.64794500  | -2.04101200 |

---

|   |             |             |             |
|---|-------------|-------------|-------------|
| H | 4.52256200  | 1.94617300  | -1.55988100 |
| H | 2.73836800  | 2.11223400  | -3.31751100 |
| C | 3.69133600  | -1.72625500 | -0.64469300 |
| C | 2.80491400  | -2.21922100 | 0.34835400  |
| C | 3.22876700  | -1.94789700 | -1.91677700 |
| C | 1.59777600  | -2.69211600 | -0.16983500 |
| S | 1.68889000  | -2.69714300 | -1.92889000 |
| O | 4.85956800  | -1.10428500 | -0.33924500 |
| C | 4.85432800  | -0.66032000 | 1.02835200  |
| O | 3.08848300  | -2.21060000 | 1.65799300  |
| C | 4.43582300  | -1.77489400 | 1.94867800  |
| H | 3.68749200  | -1.60977800 | -2.83855700 |
| H | 5.87504500  | -0.33922700 | 1.24542400  |
| H | 4.17293100  | 0.19711500  | 1.12614000  |
| H | 4.41971500  | -1.44556100 | 2.98956200  |
| H | 0.95321700  | -3.40829200 | 0.33483800  |
| H | -2.88987500 | -5.15022600 | 0.47689900  |
| H | -3.71741400 | -3.84873800 | -0.40262400 |
| H | -2.51505800 | -4.82337300 | -1.24205400 |
| H | 5.10324100  | -2.64011700 | 1.85231200  |
| C | -1.34690700 | 2.21038600  | -0.62385900 |
| C | -0.56558200 | 3.07884900  | 0.15320800  |
| C | -1.78424600 | 2.63398700  | -1.88449200 |
| C | -0.23696400 | 4.34403900  | -0.31853100 |
| H | -0.21538400 | 2.76378100  | 1.13613100  |
| C | -1.44906900 | 3.90191800  | -2.35508300 |
| H | -2.39546700 | 1.97772200  | -2.50188400 |
| C | -0.67613700 | 4.75915100  | -1.57533000 |
| H | 0.37266100  | 5.00350100  | 0.29705300  |
| H | -1.80072800 | 4.22046200  | -3.33444700 |
| H | -0.41605600 | 5.74898700  | -1.94580800 |
| C | -2.25966200 | 0.76526000  | 1.71449600  |
| C | -2.85936600 | 1.95475000  | 2.14704400  |
| C | -2.13225900 | -0.30983300 | 2.60435200  |
| C | -3.31434200 | 2.06988700  | 3.45778300  |
| H | -2.96992000 | 2.79207400  | 1.45918800  |
| C | -2.59415900 | -0.18909200 | 3.91182400  |
| H | -1.67628600 | -1.24188200 | 2.25993900  |
| C | -3.17984700 | 1.00078300  | 4.34140300  |
| H | -3.77510800 | 2.99853700  | 3.78878600  |
| H | -2.49055600 | -1.02572300 | 4.60030300  |
| H | -3.53300000 | 1.09533600  | 5.36657700  |
| C | -3.14389200 | -0.04056200 | -0.93176700 |
| C | -2.94676000 | -0.56112300 | -2.21852200 |

---

|   |             |             |             |
|---|-------------|-------------|-------------|
| C | -4.43875900 | 0.01970300  | -0.40596800 |
| C | -4.03084500 | -0.98987800 | -2.97603100 |
| H | -1.93358200 | -0.64528600 | -2.61339400 |
| C | -5.52123300 | -0.42373800 | -1.16360600 |
| H | -4.60581500 | 0.41381300  | 0.59552800  |
| C | -5.31986400 | -0.92416600 | -2.44751400 |
| H | -3.86841600 | -1.38998200 | -3.97481800 |
| H | -6.52524900 | -0.37414900 | -0.74672700 |
| H | -6.16776800 | -1.26858800 | -3.03635800 |
| P | -1.68827800 | 0.53045900  | 0.00240700  |

TS<sub>EE</sub>(L4)

-----  
M06-L electronic energy (Hartree): -2954.155303

M06-L thermal correction to free energy (Hartree): 0.465192

Three lowest frequencies (cm<sup>-1</sup>): -585.08, 21.38, 28.15

-----

|    |             |             |             |
|----|-------------|-------------|-------------|
| Pd | -0.01695600 | 0.97412300  | 0.00290700  |
| O  | -0.62206500 | 4.08577200  | 0.59747400  |
| O  | 1.02538300  | 2.88531100  | -0.35776200 |
| C  | 0.57066300  | 3.95377100  | 0.10880800  |
| C  | 1.42082300  | 5.18445400  | 0.13777700  |
| C  | -0.97433800 | -0.71331200 | 0.45326400  |
| C  | -1.70029700 | -1.51505900 | -0.38615500 |
| S  | -1.03767000 | -1.37665800 | 2.05937200  |
| C  | -2.31082600 | -2.63914900 | 0.25185700  |
| C  | -2.04258900 | -2.71107200 | 1.59260300  |
| H  | -2.37344400 | -3.45682100 | 2.30464600  |
| O  | -1.82924600 | -1.27637200 | -1.73461300 |
| C  | -2.32849200 | -2.41715200 | -2.43326000 |
| H  | -1.52527700 | -3.16137100 | -2.55116300 |
| O  | -3.07521500 | -3.54628900 | -0.42938000 |
| C  | -3.49347500 | -3.02906600 | -1.69734200 |
| H  | -3.91303200 | -3.87549200 | -2.24678100 |
| H  | -4.28145900 | -2.27389400 | -1.54505600 |
| H  | -2.63054500 | -2.06156800 | -3.42222200 |
| C  | -4.24007100 | 1.39165800  | -0.41087500 |
| C  | -3.09617500 | 1.48735500  | 0.43087600  |
| C  | -3.98326000 | 1.79263300  | -1.69656500 |
| C  | -1.92803900 | 1.92680300  | -0.18041500 |
| S  | -2.33455600 | 2.25090600  | -1.86497300 |
| O  | -5.44977400 | 0.93524100  | 0.03068700  |
| C  | -5.28992900 | 0.16450100  | 1.22805800  |

---

|   |             |             |             |
|---|-------------|-------------|-------------|
| O | -3.14379400 | 1.16357000  | 1.74928300  |
| C | -4.47002800 | 0.92541800  | 2.23695200  |
| H | -4.68766000 | 1.85144500  | -2.51828700 |
| H | -6.29714600 | -0.03064400 | 1.60298500  |
| H | -4.80137800 | -0.79252500 | 0.98521700  |
| H | -4.35081800 | 0.35487800  | 3.16208300  |
| H | -1.19267300 | 3.13706900  | 0.37601500  |
| H | 0.88809000  | 6.02580000  | -0.31513600 |
| H | 1.62723200  | 5.45978100  | 1.17773100  |
| H | 2.36593700  | 5.01652200  | -0.38152000 |
| H | -4.94844100 | 1.88737600  | 2.46895400  |
| C | 1.84071000  | -1.86843500 | -0.90806600 |
| C | 1.16548400  | -2.95490500 | -0.33081600 |
| C | 2.32782400  | -1.99018500 | -2.21498900 |
| C | 0.98825400  | -4.13450500 | -1.04507100 |
| H | 0.77511500  | -2.87622000 | 0.68368600  |
| C | 2.14398300  | -3.17266400 | -2.92865300 |
| H | 2.85895900  | -1.16132400 | -2.68099200 |
| C | 1.47468500  | -4.24672800 | -2.34687800 |
| H | 0.45777800  | -4.96559900 | -0.58252300 |
| H | 2.53242800  | -3.25337800 | -3.94212400 |
| H | 1.33205800  | -5.16953100 | -2.90629300 |
| C | 2.47378000  | -0.74970800 | 1.68913900  |
| C | 3.23590400  | -1.89376500 | 1.95556600  |
| C | 2.10870400  | 0.09208700  | 2.74752300  |
| C | 3.61612600  | -2.19345500 | 3.26098400  |
| H | 3.52436900  | -2.55584200 | 1.13954200  |
| C | 2.49516700  | -0.20617900 | 4.05026300  |
| H | 1.50147600  | 0.97628900  | 2.54220500  |
| C | 3.24506300  | -1.35220800 | 4.30852200  |
| H | 4.20297500  | -3.08785500 | 3.46046300  |
| H | 2.20044200  | 0.45001900  | 4.86674100  |
| H | 3.53804600  | -1.59264500 | 5.32858000  |
| C | 3.37423000  | 0.57165500  | -0.73142000 |
| C | 3.16203100  | 1.32751500  | -1.89304100 |
| C | 4.66279900  | 0.49512200  | -0.19055200 |
| C | 4.22372000  | 1.97858500  | -2.51263400 |
| H | 2.15512400  | 1.41132700  | -2.30286000 |
| C | 5.72161000  | 1.15700700  | -0.80803500 |
| H | 4.84221100  | -0.08293900 | 0.71514300  |
| C | 5.50489100  | 1.89560400  | -1.96912600 |
| H | 4.04815700  | 2.55987100  | -3.41568500 |
| H | 6.71977900  | 1.09204700  | -0.37931600 |
| H | 6.33401800  | 2.41182000  | -2.44904400 |

---

|   |            |             |            |
|---|------------|-------------|------------|
| P | 1.94649000 | -0.29012100 | 0.00837200 |
|---|------------|-------------|------------|

Post-TS<sub>EE</sub>(L4)

-----  
M06-L electronic energy (Hartree): -2954.166929

M06-L thermal correction to free energy (Hartree): 0.471678

Three lowest frequencies (cm<sup>-1</sup>): 20.23, 23.02, 26.73  
-----

|    |             |             |             |
|----|-------------|-------------|-------------|
| Pd | -0.68586400 | -0.01635800 | 0.25307300  |
| O  | -2.50094600 | 1.38326700  | -1.99653500 |
| O  | -1.36416500 | 2.06327900  | -0.17534100 |
| C  | -2.00597800 | 2.31656200  | -1.19931800 |
| C  | -2.28698400 | 3.70322200  | -1.65688300 |
| C  | 0.04936200  | -1.82066500 | 0.58839900  |
| C  | 0.77684200  | -2.57318400 | -0.29371500 |
| S  | -0.04483100 | -2.66080400 | 2.10478400  |
| C  | 1.27310400  | -3.80120200 | 0.24322000  |
| C  | 0.91416800  | -3.99872400 | 1.54884700  |
| H  | 1.16117300  | -4.83290400 | 2.19341900  |
| O  | 1.04361900  | -2.17489300 | -1.58434700 |
| C  | 2.17685600  | -2.87140400 | -2.11252800 |
| H  | 3.09543700  | -2.49198800 | -1.63824300 |
| O  | 2.05646400  | -4.65794200 | -0.47641100 |
| C  | 2.04412300  | -4.35547600 | -1.87741600 |
| H  | 2.88610000  | -4.90185500 | -2.31014300 |
| H  | 1.11044900  | -4.72980100 | -2.32288300 |
| H  | 2.20580600  | -2.64195700 | -3.18113400 |
| C  | -4.92437100 | -1.15918700 | 0.09335200  |
| C  | -3.81069800 | -0.29402100 | 0.32964800  |
| C  | -4.54551900 | -2.40495600 | -0.32713200 |
| C  | -2.56764100 | -0.84795200 | 0.09220200  |
| S  | -2.82252300 | -2.50146200 | -0.41150500 |
| O  | -6.22464800 | -0.76845200 | 0.25445200  |
| C  | -6.33785600 | 0.47039100  | 0.96268700  |
| O  | -3.99243300 | 1.00319500  | 0.75199500  |
| C  | -5.31601700 | 1.46525500  | 0.47342100  |
| H  | -5.18534000 | -3.24122000 | -0.58176500 |
| H  | -7.35626500 | 0.82661200  | 0.78721600  |
| H  | -6.20376800 | 0.29107800  | 2.03967500  |
| H  | -5.41951900 | 2.42464100  | 0.98680200  |
| H  | -2.35844800 | 0.50089000  | -1.55719700 |
| H  | -1.91562800 | 3.83956700  | -2.67805700 |
| H  | -3.36873500 | 3.87334500  | -1.68248800 |
| H  | -1.81548100 | 4.42834900  | -0.99335400 |

---

|   |             |             |             |
|---|-------------|-------------|-------------|
| H | -5.42969100 | 1.62610300  | -0.61039000 |
| C | 2.99922300  | -0.09864200 | 0.08791800  |
| C | 3.18109700  | -1.10376400 | 1.04929800  |
| C | 3.97259200  | 0.08093900  | -0.90169800 |
| C | 4.31382200  | -1.91129000 | 1.01862400  |
| H | 2.42806500  | -1.26002800 | 1.82254300  |
| C | 5.10582400  | -0.73086900 | -0.92921900 |
| H | 3.84959600  | 0.85820300  | -1.65419300 |
| C | 5.27813100  | -1.72799500 | 0.02851500  |
| H | 4.43676500  | -2.69226000 | 1.76709800  |
| H | 5.85642400  | -0.57932000 | -1.70251800 |
| H | 6.16199100  | -2.36233700 | 0.00303500  |
| C | 1.85126000  | 2.02390400  | 1.62696100  |
| C | 3.12397400  | 2.57653200  | 1.82648900  |
| C | 0.82412300  | 2.32120700  | 2.52990800  |
| C | 3.35979600  | 3.41923200  | 2.90737000  |
| H | 3.93040200  | 2.34589000  | 1.12937500  |
| C | 1.06388000  | 3.16369100  | 3.61337500  |
| H | -0.16450900 | 1.88480300  | 2.37976900  |
| C | 2.32976100  | 3.71333900  | 3.80118900  |
| H | 4.34965300  | 3.84650300  | 3.05451900  |
| H | 0.26115800  | 3.38663500  | 4.31347500  |
| H | 2.51768500  | 4.36978800  | 4.64863200  |
| C | 1.55210700  | 2.01874400  | -1.26265600 |
| C | 1.32117200  | 1.42346800  | -2.51296900 |
| C | 1.70280300  | 3.40632100  | -1.18258900 |
| C | 1.26657500  | 2.20493700  | -3.66251500 |
| H | 1.18444800  | 0.34149700  | -2.57562300 |
| C | 1.63686400  | 4.18612900  | -2.33606300 |
| H | 1.86717100  | 3.88293300  | -0.21714800 |
| C | 1.42272200  | 3.58896400  | -3.57545200 |
| H | 1.09560000  | 1.73370400  | -4.62851100 |
| H | 1.75287400  | 5.26575100  | -2.26235500 |
| H | 1.37240900  | 4.20040000  | -4.47417600 |
| P | 1.50051800  | 0.93780500  | 0.20484400  |

Int<sub>EE</sub>(L5)

-----

M06-L electronic energy (Hartree): -2291.228164

M06-L thermal correction to free energy (Hartree): 0.447445

Three lowest frequencies (cm<sup>-1</sup>): 24.80, 32.81, 35.43

-----

|    |             |            |             |
|----|-------------|------------|-------------|
| Pd | -0.20525700 | 1.50631900 | -0.37475400 |
| O  | -0.16112900 | 3.70483100 | -0.52544500 |

---

|   |             |             |             |
|---|-------------|-------------|-------------|
| O | -2.00376800 | 2.69574300  | 0.16015700  |
| C | -1.36990700 | 3.76473900  | -0.11928700 |
| C | -2.04402600 | 5.09544500  | -0.00063600 |
| C | 1.66197600  | 1.03626200  | -0.82389300 |
| C | 2.68479100  | 0.69705300  | 0.02415800  |
| S | 2.29298800  | 1.22108700  | -2.43428400 |
| C | 3.95942000  | 0.57475700  | -0.61306200 |
| C | 3.91308100  | 0.81921200  | -1.95931900 |
| H | 4.73118200  | 0.81902700  | -2.66893600 |
| O | 2.52771700  | 0.52436300  | 1.37727700  |
| C | 3.62676600  | -0.19064500 | 1.94874800  |
| H | 3.55913000  | -1.25125900 | 1.66637700  |
| O | 5.09477300  | 0.24053800  | 0.06814700  |
| C | 4.93846800  | 0.39130200  | 1.48598600  |
| H | 5.78481900  | -0.13145400 | 1.93849600  |
| H | 4.99820500  | 1.45821600  | 1.74673200  |
| H | 3.51467600  | -0.10403200 | 3.03286600  |
| H | -2.90035600 | 5.04539200  | 0.67616200  |
| H | -1.33995700 | 5.85847000  | 0.34265000  |
| H | -2.40806900 | 5.40691300  | -0.98673200 |
| C | 0.43349800  | -1.83798300 | 0.68461200  |
| C | 1.42779100  | -2.37755600 | -0.16107800 |
| C | 0.37740800  | -2.23999800 | 2.02748000  |
| C | 2.32721100  | -3.30257200 | 0.38344800  |
| C | 1.28583100  | -3.15650000 | 2.54475600  |
| H | -0.39934100 | -1.84437500 | 2.67873000  |
| C | 2.26588200  | -3.69404200 | 1.71547100  |
| H | 3.09010800  | -3.72534800 | -0.27052800 |
| H | 1.21800700  | -3.45400800 | 3.58892900  |
| H | 2.98070500  | -4.41696000 | 2.10385100  |
| C | -1.64877800 | -1.55618300 | -1.29659600 |
| C | -1.55284600 | -2.95633300 | -1.31362500 |
| C | -2.43170900 | -0.90173800 | -2.27420700 |
| C | -2.19326900 | -3.71165300 | -2.28832200 |
| H | -0.97014200 | -3.46666000 | -0.54911000 |
| C | -3.06204400 | -1.68533400 | -3.24735600 |
| C | -2.94570800 | -3.07045900 | -3.26712500 |
| H | -2.10369900 | -4.79572100 | -2.27765100 |
| H | -3.66413300 | -1.18374200 | -4.00440700 |
| H | -3.44983700 | -3.64619300 | -4.04081200 |
| C | -2.08330400 | -0.48006200 | 1.35661000  |
| C | -1.83437500 | 0.26806100  | 2.53202200  |
| C | -3.34204700 | -1.06868100 | 1.16414800  |
| C | -2.85971000 | 0.36941600  | 3.47737600  |

---

|   |             |             |             |
|---|-------------|-------------|-------------|
| C | -4.34897700 | -0.93879000 | 2.11514800  |
| H | -3.53880900 | -1.64243800 | 0.26098200  |
| C | -4.10466300 | -0.21825100 | 3.27924100  |
| H | -2.66740400 | 0.93130600  | 4.39105900  |
| H | -5.31629800 | -1.40657000 | 1.94515200  |
| H | -4.88066600 | -0.11276500 | 4.03485600  |
| P | -0.80354900 | -0.64231000 | 0.05258200  |
| C | -2.63247300 | 0.58101300  | -2.30572800 |
| H | -2.94293200 | 0.98471800  | -1.33371500 |
| H | -1.70769800 | 1.11067400  | -2.57914800 |
| H | -3.39622400 | 0.85250400  | -3.04219300 |
| C | -0.53790800 | 0.96839200  | 2.80557800  |
| H | -0.53557200 | 1.96807200  | 2.34519900  |
| H | -0.39302500 | 1.10676600  | 3.88312500  |
| H | 0.33761300  | 0.44193400  | 2.40891500  |
| C | 1.55018500  | -2.06814800 | -1.62252000 |
| H | 0.88217200  | -1.27133600 | -1.95554900 |
| H | 2.57405500  | -1.75358300 | -1.86503200 |
| H | 1.32662300  | -2.95912700 | -2.22502100 |

Pre-TS<sub>EE</sub>(L5)

-----  
M06-L electronic energy (Hartree): -2291.228164

M06-L thermal correction to free energy (Hartree): 0.553314

Three lowest frequencies (cm<sup>-1</sup>): 20.06, 25.33, 32.55  
-----

|    |             |             |             |
|----|-------------|-------------|-------------|
| Pd | 0.11774300  | -0.95626300 | 0.17294300  |
| O  | -0.58869400 | -3.90253700 | 1.35541200  |
| O  | -1.09061000 | -2.63416000 | -0.44636900 |
| C  | -1.21031900 | -3.67904800 | 0.30190800  |
| C  | -2.25386700 | -4.65850800 | -0.20020300 |
| C  | 1.36602500  | 0.52664200  | 0.64316400  |
| C  | 2.03638800  | 1.38106900  | -0.19465000 |
| S  | 1.88105400  | 0.82546100  | 2.27933700  |
| C  | 2.95051900  | 2.26109700  | 0.46774000  |
| C  | 2.96986600  | 2.09728600  | 1.82819100  |
| H  | 3.57139300  | 2.62377300  | 2.55891500  |
| O  | 1.87025700  | 1.38950200  | -1.56039900 |
| C  | 2.43334100  | 2.55866700  | -2.15728100 |
| H  | 1.77515500  | 3.42138900  | -1.97095800 |
| O  | 3.72975300  | 3.15832000  | -0.20736100 |
| C  | 3.80778900  | 2.83529600  | -1.60159600 |
| H  | 4.26863300  | 3.69943400  | -2.08663700 |

---

|   |             |             |             |
|---|-------------|-------------|-------------|
| H | 4.45996500  | 1.95765600  | -1.73680700 |
| H | 2.47121400  | 2.36438700  | -3.23259800 |
| C | 3.90696200  | -1.55740300 | -0.64808300 |
| C | 3.10242600  | -2.03277100 | 0.41762800  |
| C | 3.32887200  | -1.77161200 | -1.87561300 |
| C | 1.84774900  | -2.49668100 | 0.01296700  |
| S | 1.79026200  | -2.50780300 | -1.74991300 |
| O | 5.11634600  | -0.97223500 | -0.45244500 |
| C | 5.26654500  | -0.54908700 | 0.91356600  |
| O | 3.50601300  | -2.04058600 | 1.69508100  |
| C | 4.88768600  | -1.65368800 | 1.86363500  |
| H | 3.71677900  | -1.45220700 | -2.83597200 |
| H | 6.31866300  | -0.28203100 | 1.03266600  |
| H | 4.64286400  | 0.33949300  | 1.08661400  |
| H | 4.97600900  | -1.32748200 | 2.90219200  |
| H | 1.25558800  | -3.22491000 | 0.57073200  |
| H | -2.18299300 | -4.79156700 | -1.28483900 |
| H | -2.16861000 | -5.62812600 | 0.29778500  |
| H | -3.25272000 | -4.25081600 | 0.00448700  |
| H | 5.51158600  | -2.54248700 | 1.70863600  |
| C | -1.43888400 | 2.10933600  | -0.83436400 |
| C | -0.78495500 | 3.19259400  | -0.20179900 |
| C | -1.87135400 | 2.25949800  | -2.16167300 |
| C | -0.56945900 | 4.36126600  | -0.94298200 |
| C | -1.64438000 | 3.42994300  | -2.87554800 |
| H | -2.41482700 | 1.45434200  | -2.64732100 |
| C | -0.98117400 | 4.48882500  | -2.26351100 |
| H | -0.06509100 | 5.19340700  | -0.45101800 |
| H | -1.99474300 | 3.51160400  | -3.90241600 |
| H | -0.79183700 | 5.41248100  | -2.80755300 |
| C | -2.61583500 | 0.93597900  | 1.54398800  |
| C | -3.32076700 | 2.14756600  | 1.58833700  |
| C | -2.67056000 | 0.05810400  | 2.64840800  |
| C | -4.05109500 | 2.51487100  | 2.71229300  |
| H | -3.30084200 | 2.81227800  | 0.72587500  |
| C | -3.40209100 | 0.45582300  | 3.77331800  |
| C | -4.08173200 | 1.66769100  | 3.81644000  |
| H | -4.59424200 | 3.45765400  | 2.72099000  |
| H | -3.44405800 | -0.21775800 | 4.62877300  |
| H | -4.64509700 | 1.94349700  | 4.70574200  |
| C | -2.98721500 | -0.37401300 | -0.99693400 |
| C | -2.68406500 | -0.94401800 | -2.25424600 |
| C | -4.27507700 | -0.53648600 | -0.46339700 |
| C | -3.69729100 | -1.62967600 | -2.93261700 |

---

|   |             |             |             |
|---|-------------|-------------|-------------|
| C | -5.26187300 | -1.23211700 | -1.15298100 |
| H | -4.51719000 | -0.11008100 | 0.50712200  |
| C | -4.97126500 | -1.78129300 | -2.39747600 |
| H | -3.46624400 | -2.06002200 | -3.90738600 |
| H | -6.25262400 | -1.33912500 | -0.71621700 |
| H | -5.73301400 | -2.32643900 | -2.95184000 |
| P | -1.71316500 | 0.49450900  | 0.00820200  |
| C | -2.02837500 | -1.29147200 | 2.63706400  |
| H | -2.35583800 | -1.88667400 | 1.77560300  |
| H | -0.93194700 | -1.23875000 | 2.55988200  |
| H | -2.27295800 | -1.85290300 | 3.54506400  |
| C | -1.34013200 | -0.85799600 | -2.91577000 |
| H | -0.90422200 | -1.85877200 | -3.01429900 |
| H | -1.42701500 | -0.43689700 | -3.92592300 |
| H | -0.61609500 | -0.24770200 | -2.36463200 |
| C | -0.37190500 | 3.21189000  | 1.23754500  |
| H | -0.35952500 | 2.22506000  | 1.70114400  |
| H | 0.63428900  | 3.63527500  | 1.34667400  |
| H | -1.05767400 | 3.83910300  | 1.82416000  |

TS<sub>EE</sub>(L5)

-----  
M06-L electronic energy (Hartree): -3072.117204

M06-L thermal correction to free energy (Hartree): 0.548017

Three lowest frequencies (cm<sup>-1</sup>): -624.14, 19.93, 29.02

-----

|    |             |             |             |
|----|-------------|-------------|-------------|
| Pd | 0.12141600  | -0.81056500 | 0.12939300  |
| O  | 0.59713100  | -3.95705100 | 0.76459500  |
| O  | -1.01811600 | -2.69193700 | -0.15822900 |
| C  | -0.60973700 | -3.76586600 | 0.33642300  |
| C  | -1.55990600 | -4.91171400 | 0.48982300  |
| C  | 1.21953800  | 0.76828100  | 0.62119200  |
| C  | 2.04051700  | 1.54278200  | -0.15394400 |
| S  | 1.44198400  | 1.20873900  | 2.28949800  |
| C  | 2.83604200  | 2.47806500  | 0.57931000  |
| C  | 2.62121100  | 2.42890000  | 1.93126600  |
| H  | 3.06373100  | 3.04592800  | 2.70345300  |
| O  | 2.11924300  | 1.43626200  | -1.52491000 |
| C  | 2.69587100  | 2.60801100  | -2.09953500 |
| H  | 1.97787600  | 3.44221100  | -2.04276600 |
| O  | 3.70978100  | 3.34059800  | -0.02512200 |
| C  | 3.97225700  | 2.97577300  | -1.38489800 |
| H  | 4.45297100  | 3.84407200  | -1.84295200 |

---

|   |             |             |             |
|---|-------------|-------------|-------------|
| H | 4.67261100  | 2.12619100  | -1.40951600 |
| H | 2.88608500  | 2.37415100  | -3.15026000 |
| C | 4.28246000  | -1.58905000 | -0.54674600 |
| C | 3.20504500  | -1.58644900 | 0.38439600  |
| C | 3.88276300  | -1.92548400 | -1.81433700 |
| C | 1.95045400  | -1.88477100 | -0.13801300 |
| S | 2.18605700  | -2.19869900 | -1.85895800 |
| O | 5.56506400  | -1.27631500 | -0.19631300 |
| C | 5.58838100  | -0.54275300 | 1.03445000  |
| O | 3.39624500  | -1.32869600 | 1.70235900  |
| C | 4.77590100  | -1.25305400 | 2.08441500  |
| H | 4.50955300  | -2.03155800 | -2.69252700 |
| H | 6.63795700  | -0.46967000 | 1.32705500  |
| H | 5.18672800  | 0.46955300  | 0.86793100  |
| H | 4.79290100  | -0.71011800 | 3.03328600  |
| H | 1.20815300  | -3.03904300 | 0.47224000  |
| H | -2.37656900 | -4.82674400 | -0.23149400 |
| H | -1.05142200 | -5.87274300 | 0.38262300  |
| H | -1.99386300 | -4.87559900 | 1.49652300  |
| H | 5.16219400  | -2.26920100 | 2.24529000  |
| C | -1.86724800 | 1.92113500  | -1.13910100 |
| C | -1.20019700 | 3.11816100  | -0.78434900 |
| C | -2.44996300 | 1.82635000  | -2.41432800 |
| C | -1.09760400 | 4.13181600  | -1.74603500 |
| C | -2.34183300 | 2.85025900  | -3.34682100 |
| H | -3.01355000 | 0.93803300  | -2.68428000 |
| C | -1.64278100 | 4.00714500  | -3.01721000 |
| H | -0.57671000 | 5.04897500  | -1.46900500 |
| H | -2.80440600 | 2.73921300  | -4.32534300 |
| H | -1.53617800 | 4.81454700  | -3.73929300 |
| C | -2.73392800 | 0.97173800  | 1.50050800  |
| C | -3.44199400 | 2.18000200  | 1.53468200  |
| C | -2.68680600 | 0.15656600  | 2.65479300  |
| C | -4.07667400 | 2.60951100  | 2.69478000  |
| H | -3.49678800 | 2.79392500  | 0.63689300  |
| C | -3.32938600 | 0.61177300  | 3.81066200  |
| C | -4.01148100 | 1.82377100  | 3.84166400  |
| H | -4.62196100 | 3.55112400  | 2.69802100  |
| H | -3.29781100 | -0.01254200 | 4.70306300  |
| H | -4.50042300 | 2.14775700  | 4.75850700  |
| C | -3.12842900 | -0.70434500 | -0.81946700 |
| C | -2.81930500 | -1.41565700 | -2.00096800 |
| C | -4.33983500 | -0.96488800 | -0.16181300 |
| C | -3.74792700 | -2.34541100 | -2.48021700 |

---

|   |             |             |             |
|---|-------------|-------------|-------------|
| C | -5.24003100 | -1.90646400 | -0.64888900 |
| H | -4.58756600 | -0.42378800 | 0.74931000  |
| C | -4.94184400 | -2.60162300 | -1.81667400 |
| H | -3.51083400 | -2.88914200 | -3.39510100 |
| H | -6.17174400 | -2.08934000 | -0.11719200 |
| H | -5.63668400 | -3.34031100 | -2.21190700 |
| P | -1.91134600 | 0.43765000  | -0.04429300 |
| C | -2.02017600 | -1.18471100 | 2.66937200  |
| H | -2.39632800 | -1.83599000 | 1.86804000  |
| H | -0.93279200 | -1.10775600 | 2.51068400  |
| H | -2.18515900 | -1.69352500 | 3.62506200  |
| C | -1.54913200 | -1.24221700 | -2.78285200 |
| H | -1.01501100 | -2.19734600 | -2.85791200 |
| H | -1.76041300 | -0.90882200 | -3.80742700 |
| H | -0.85375900 | -0.51804600 | -2.34228600 |
| C | -0.66417400 | 3.41632800  | 0.58233200  |
| H | -0.62853400 | 2.54512500  | 1.23608000  |
| H | 0.35247400  | 3.82625800  | 0.53049200  |
| H | -1.29345500 | 4.17050200  | 1.07613500  |

Post-TS<sub>EE</sub>(L5)

-----  
M06-L electronic energy (Hartree): -3072.122292

M06-L thermal correction to free energy (Hartree): 0.550152

Three lowest frequencies (cm<sup>-1</sup>): 20.25, 29.01, 30.79

-----

|    |             |             |             |
|----|-------------|-------------|-------------|
| Pd | 0.28303500  | -0.69328100 | 0.08072300  |
| O  | 0.83742400  | -3.74603100 | 1.14233800  |
| O  | -0.63336100 | -2.71761200 | -0.21443700 |
| C  | -0.29049500 | -3.69711500 | 0.45657300  |
| C  | -1.13354700 | -4.91904000 | 0.56628600  |
| C  | 1.19478900  | 0.99248100  | 0.57203400  |
| C  | 1.92432800  | 1.86178500  | -0.19078500 |
| S  | 1.26816800  | 1.49774500  | 2.23427500  |
| C  | 2.51479700  | 2.93774000  | 0.54495100  |
| C  | 2.24638200  | 2.88809100  | 1.88611200  |
| H  | 2.54279400  | 3.58960400  | 2.65604100  |
| O  | 2.08913400  | 1.73424800  | -1.55373300 |
| C  | 2.48385500  | 2.97373200  | -2.14295700 |
| H  | 1.62941800  | 3.67000700  | -2.15282600 |
| O  | 3.24083400  | 3.93131000  | -0.05145900 |
| C  | 3.63554500  | 3.58221600  | -1.38282700 |

---

|   |             |             |             |
|---|-------------|-------------|-------------|
| H | 3.97624800  | 4.51017500  | -1.84924800 |
| H | 4.47647400  | 2.87312100  | -1.34203100 |
| H | 2.76721400  | 2.74771900  | -3.17397500 |
| C | 4.49498000  | -1.72988600 | -0.55922000 |
| C | 3.43203300  | -1.26978100 | 0.28039800  |
| C | 4.05324200  | -2.31333000 | -1.71527300 |
| C | 2.16001200  | -1.49489300 | -0.20631000 |
| S | 2.32662500  | -2.28660100 | -1.76496700 |
| O | 5.81422800  | -1.59870300 | -0.22695400 |
| C | 6.00201200  | -0.61985800 | 0.80075900  |
| O | 3.68269100  | -0.65852200 | 1.47797100  |
| C | 5.02636100  | -0.84557800 | 1.92617900  |
| H | 4.64753900  | -2.76906100 | -2.49816500 |
| H | 7.03554900  | -0.72777200 | 1.13833100  |
| H | 5.86547400  | 0.38769700  | 0.37757600  |
| H | 5.17690000  | -0.12337900 | 2.73308100  |
| H | 1.35581800  | -2.91651300 | 0.91038100  |
| H | -2.07831300 | -4.77598100 | 0.03800800  |
| H | -0.60378500 | -5.78190000 | 0.14975900  |
| H | -1.32786800 | -5.14208200 | 1.62040800  |
| H | 5.14498000  | -1.86233200 | 2.33072100  |
| C | -2.20651800 | 1.68758700  | -1.22660900 |
| C | -1.65357400 | 2.97340100  | -1.01541400 |
| C | -2.91665800 | 1.44728100  | -2.41447300 |
| C | -1.78736100 | 3.93044300  | -2.02998300 |
| C | -3.04450700 | 2.41721600  | -3.40130900 |
| H | -3.39511800 | 0.48463900  | -2.56981100 |
| C | -2.45924600 | 3.66557900  | -3.21605500 |
| H | -1.35615900 | 4.91782300  | -1.86270000 |
| H | -3.60263200 | 2.19295500  | -4.30804200 |
| H | -2.54082700 | 4.43491100  | -3.98154400 |
| C | -2.75371300 | 0.82523500  | 1.51694600  |
| C | -3.56407700 | 1.96741600  | 1.54235000  |
| C | -2.55885300 | 0.08293000  | 2.70523400  |
| C | -4.15700800 | 2.40464300  | 2.72202500  |
| H | -3.73449900 | 2.52464500  | 0.62234500  |
| C | -3.16291300 | 0.54311800  | 3.87934200  |
| C | -3.94696700 | 1.69277600  | 3.89848300  |
| H | -4.78083800 | 3.29594300  | 2.71751600  |
| H | -3.01557400 | -0.02540800 | 4.79738600  |
| H | -4.39946400 | 2.02472700  | 4.83101700  |
| C | -3.07632100 | -1.04040700 | -0.66999100 |
| C | -2.75622400 | -1.77151000 | -1.83734900 |
| C | -4.20547900 | -1.40549700 | 0.07713100  |

---

|   |             |             |             |
|---|-------------|-------------|-------------|
| C | -3.58861900 | -2.83228200 | -2.20818200 |
| C | -5.01267500 | -2.47171100 | -0.30548400 |
| H | -4.46096300 | -0.84817600 | 0.97644600  |
| C | -4.70225600 | -3.18968100 | -1.45631700 |
| H | -3.34138000 | -3.39491300 | -3.10868800 |
| H | -5.88148900 | -2.73477400 | 0.29435000  |
| H | -5.32305500 | -4.02777200 | -1.76785100 |
| P | -1.96420200 | 0.28948200  | -0.04574900 |
| C | -1.76838900 | -1.18970500 | 2.73844800  |
| H | -2.15702700 | -1.92778000 | 2.02212100  |
| H | -0.71171500 | -1.02753300 | 2.47166600  |
| H | -1.79721500 | -1.64407800 | 3.73425300  |
| C | -1.57937000 | -1.46519300 | -2.71694700 |
| H | -1.05238700 | -2.38687700 | -2.98921700 |
| H | -1.89404500 | -0.98240100 | -3.65190700 |
| H | -0.84476100 | -0.79962100 | -2.24434000 |
| C | -1.02067900 | 3.41546000  | 0.26827000  |
| H | -0.73838500 | 2.58934800  | 0.92252600  |
| H | -0.12031500 | 4.01392800  | 0.08382500  |
| H | -1.71878200 | 4.05203900  | 0.83061700  |

Int<sub>EE</sub>(L6)

-----  
M06-L electronic energy (Hartree): -2516.895545

M06-L thermal correction to free energy (Hartree): 0.456603

Three lowest frequencies (cm<sup>-1</sup>): 13.35, 27.98, 28.70

-----

|   |             |             |             |
|---|-------------|-------------|-------------|
| C | -0.04940100 | -2.06988900 | -0.92477500 |
| C | -1.34813300 | -2.46355300 | -0.53363400 |
| C | 0.48912700  | -2.60449000 | -2.09735200 |
| C | -2.08190700 | -3.35227900 | -1.32149200 |
| C | -0.24047000 | -3.49094100 | -2.88524600 |
| H | 1.49416700  | -2.31917200 | -2.40085100 |
| C | -1.52591600 | -3.85402700 | -2.49515800 |
| H | -3.08433300 | -3.65013300 | -1.02711000 |
| H | 0.19548500  | -3.89407000 | -3.79615000 |
| H | -2.10871900 | -4.54227200 | -3.10450700 |
| C | 0.98814400  | -1.49795600 | 1.71262000  |
| C | 0.79088600  | -2.85902500 | 1.95975500  |
| C | 1.36167200  | -0.66224000 | 2.78542500  |
| C | 0.94186800  | -3.38866700 | 3.23741100  |
| H | 0.51646400  | -3.51367800 | 1.13399700  |
| C | 1.50402900  | -1.18785100 | 4.07250000  |
| C | 1.29197600  | -2.54648100 | 4.28891800  |

---

|    |             |             |             |
|----|-------------|-------------|-------------|
| H  | 0.78469200  | -4.45094400 | 3.40802600  |
| H  | 1.78544100  | -0.54373800 | 4.90079200  |
| H  | 1.40804900  | -2.94661900 | 5.29434700  |
| C  | 2.53309200  | -0.76741500 | -0.59842000 |
| C  | 2.79950200  | -0.12031000 | -1.82556700 |
| C  | 3.60789500  | -1.26566200 | 0.14334600  |
| C  | 4.11199700  | 0.01864100  | -2.27939300 |
| C  | 4.91745200  | -1.13749600 | -0.31145900 |
| H  | 3.41416200  | -1.75796200 | 1.09488700  |
| C  | 5.16164200  | -0.49267100 | -1.51982300 |
| H  | 4.31933200  | 0.51692400  | -3.22206000 |
| H  | 5.73937400  | -1.53568100 | 0.27863200  |
| H  | 6.18088100  | -0.38169200 | -1.88498300 |
| P  | 0.82433800  | -0.80094300 | 0.03769600  |
| O  | 1.58350900  | 0.63480300  | 2.46989000  |
| O  | 1.71288400  | 0.32567000  | -2.50456900 |
| O  | -1.79570400 | -1.93933400 | 0.63023800  |
| C  | -3.13102100 | -2.22103300 | 1.01421400  |
| H  | -3.27980000 | -3.29562500 | 1.17945500  |
| H  | -3.28664500 | -1.68180400 | 1.95003400  |
| H  | -3.84080300 | -1.86036800 | 0.25663100  |
| C  | 1.92156300  | 1.53528400  | 3.51382100  |
| H  | 2.03257100  | 2.50735800  | 3.03164300  |
| H  | 1.12713300  | 1.58068300  | 4.26901200  |
| H  | 2.86649200  | 1.24941900  | 3.99255800  |
| C  | 1.93182000  | 1.16287600  | -3.63113000 |
| H  | 2.53203600  | 2.03942100  | -3.35492500 |
| H  | 2.42823400  | 0.61723000  | -4.44287300 |
| H  | 0.94181500  | 1.48328100  | -3.95884400 |
| Pd | 0.17116300  | 1.36136300  | -0.09088700 |
| O  | 0.06825900  | 3.56542000  | -0.12312500 |
| O  | 2.01779300  | 2.58335900  | 0.22862300  |
| C  | 1.32198200  | 3.64005100  | 0.11021500  |
| C  | 1.96211300  | 4.98338300  | 0.28541800  |
| C  | -1.67178600 | 0.90070400  | -0.63903300 |
| C  | -2.83580800 | 1.00217200  | 0.07815000  |
| S  | -2.05565200 | 0.49590600  | -2.28694200 |
| C  | -4.02083800 | 0.78121500  | -0.69055200 |
| C  | -3.76646900 | 0.48773100  | -2.00384900 |
| H  | -4.47848000 | 0.31344400  | -2.80079600 |
| O  | -2.88859900 | 1.26389700  | 1.42919600  |
| C  | -4.16879500 | 1.78179700  | 1.79938000  |
| H  | -4.27807500 | 2.80640300  | 1.41212400  |
| O  | -5.27843400 | 0.87410900  | -0.16185600 |

---

|   |             |             |             |
|---|-------------|-------------|-------------|
| C | -5.27613100 | 0.90474400  | 1.26984600  |
| H | -6.25712700 | 1.28688500  | 1.56430600  |
| H | -5.16781400 | -0.11874800 | 1.65797300  |
| H | -4.18421000 | 1.81154200  | 2.89157200  |
| H | 1.95205900  | 5.25092400  | 1.34899600  |
| H | 3.00593600  | 4.96473900  | -0.03914300 |
| H | 1.41539800  | 5.75815000  | -0.25828800 |

Pre-TS<sub>EE</sub>(L6)

-----  
M06-L electronic energy (Hartree): -3297.815619

M06-L thermal correction to free energy (Hartree): 0.33667

Three lowest frequencies (cm<sup>-1</sup>): 28.63, 31.52, 35.42  
-----

|   |             |             |             |
|---|-------------|-------------|-------------|
| C | -2.01116800 | 1.35150000  | 1.59730300  |
| C | -1.79040600 | 0.60592200  | 2.77399900  |
| C | -2.56068700 | 2.63186300  | 1.70979600  |
| C | -2.08284400 | 1.16262400  | 4.02361800  |
| C | -2.86901600 | 3.18240300  | 2.94911900  |
| H | -2.74203300 | 3.21139100  | 0.80510300  |
| C | -2.61963700 | 2.44353800  | 4.10277000  |
| H | -1.90207300 | 0.59413800  | 4.93139000  |
| H | -3.29544800 | 4.18075400  | 3.01209000  |
| H | -2.84819300 | 2.86231600  | 5.08119400  |
| C | -3.13820500 | -0.17891100 | -0.55255600 |
| C | -4.28062700 | -0.18906600 | 0.25225300  |
| C | -3.13587400 | -0.95148000 | -1.73371600 |
| C | -5.40361800 | -0.93468100 | -0.10017400 |
| H | -4.28984500 | 0.39474300  | 1.17114200  |
| C | -4.25486900 | -1.70845200 | -2.08377000 |
| C | -5.38202600 | -1.69339200 | -1.26658000 |
| H | -6.28560300 | -0.92277300 | 0.53572200  |
| H | -4.24810700 | -2.31199400 | -2.98722000 |
| H | -6.24974900 | -2.28625800 | -1.55012600 |
| C | -1.42995600 | 2.09269400  | -1.13801600 |
| C | -0.56767600 | 3.17464100  | -0.83402900 |
| C | -2.16403300 | 2.15566500  | -2.32750800 |
| C | -0.43964100 | 4.24497000  | -1.72625100 |
| C | -2.03483000 | 3.21866600  | -3.21642600 |
| H | -2.86398000 | 1.36060600  | -2.56329700 |
| C | -1.16129900 | 4.25699700  | -2.91575300 |
| H | 0.22217600  | 5.07352300  | -1.49006500 |
| H | -2.62244100 | 3.23367900  | -4.13115800 |

---

|    |             |             |             |
|----|-------------|-------------|-------------|
| H  | -1.04421700 | 5.09528100  | -3.60017300 |
| P  | -1.59554900 | 0.64206800  | -0.02937700 |
| O  | -2.01597100 | -0.86435000 | -2.49160500 |
| O  | 0.07135300  | 3.12681900  | 0.35476700  |
| O  | -1.31018100 | -0.64874700 | 2.60815800  |
| C  | -0.92734200 | -1.38135100 | 3.76402300  |
| H  | -1.79640800 | -1.60082100 | 4.39743700  |
| H  | -0.50752400 | -2.31024800 | 3.37632400  |
| H  | -0.18013300 | -0.82882700 | 4.34824100  |
| C  | -1.83268200 | -1.84459400 | -3.50036300 |
| H  | -0.82940100 | -1.68024700 | -3.89679900 |
| H  | -1.90215300 | -2.85054000 | -3.06800900 |
| H  | -2.56678700 | -1.72769500 | -4.30801900 |
| C  | 0.76447100  | 4.28665200  | 0.78418500  |
| H  | 1.63783100  | 4.49103400  | 0.14989700  |
| H  | 0.10002000  | 5.16158100  | 0.79047400  |
| H  | 1.10403100  | 4.06558000  | 1.79718700  |
| Pd | 0.03700700  | -1.00135200 | -0.01012000 |
| O  | -0.91719100 | -3.66017100 | 1.49204600  |
| O  | -1.33150200 | -2.62093000 | -0.46946000 |
| C  | -1.54896000 | -3.51910600 | 0.42785600  |
| C  | -2.71123000 | -4.44377100 | 0.11339900  |
| C  | 1.39895600  | 0.39141400  | 0.39241400  |
| C  | 2.21253300  | 1.10566500  | -0.44797500 |
| S  | 1.76806900  | 0.82727600  | 2.03455100  |
| C  | 3.13846900  | 1.96650200  | 0.21931600  |
| C  | 3.02316300  | 1.93431100  | 1.58388400  |
| H  | 3.60037900  | 2.48195000  | 2.31873200  |
| O  | 2.14113900  | 1.03149500  | -1.82297900 |
| C  | 2.82447400  | 2.11724000  | -2.44559300 |
| H  | 2.22147000  | 3.03701900  | -2.35931200 |
| O  | 4.03710700  | 2.74976300  | -0.45253300 |
| C  | 4.17809400  | 2.32997300  | -1.81444100 |
| H  | 4.73757300  | 3.12113200  | -2.31957600 |
| H  | 4.76079900  | 1.39586200  | -1.84984600 |
| H  | 2.91786900  | 1.85450900  | -3.50285800 |
| C  | 3.75065500  | -1.92552700 | -0.66340600 |
| C  | 2.86908000  | -2.35862700 | 0.35916300  |
| C  | 3.21429100  | -2.07910300 | -1.91805900 |
| C  | 1.61301300  | -2.73433000 | -0.10928800 |
| S  | 1.62025900  | -2.69968100 | -1.86788900 |
| O  | 4.98145400  | -1.41062900 | -0.40502200 |
| C  | 5.08740500  | -1.00794000 | 0.97170700  |
| O  | 3.20682200  | -2.38972400 | 1.65989300  |

---

|   |             |             |             |
|---|-------------|-------------|-------------|
| C | 4.60186100  | -2.09949300 | 1.88839700  |
| H | 3.65509900  | -1.75306700 | -2.85286100 |
| H | 6.14567500  | -0.79972400 | 1.14395600  |
| H | 4.50389900  | -0.08782300 | 1.12348700  |
| H | 4.67196000  | -1.79680000 | 2.93532600  |
| H | 0.92331800  | -3.38436900 | 0.42732000  |
| H | -3.63862400 | -3.98450200 | 0.47942200  |
| H | -2.83315800 | -4.59567800 | -0.96391000 |
| H | -2.59673500 | -5.40891400 | 0.61599600  |
| H | 5.17492400  | -3.02388500 | 1.74045200  |

TS<sub>EE</sub>(L6)

-----  
M06-L electronic energy (Hartree): -3297.788015

M06-L thermal correction to free energy (Hartree): 0.554368

Three lowest frequencies (cm<sup>-1</sup>): -626.71, 21.04, 25.41

-----

|   |             |             |             |
|---|-------------|-------------|-------------|
| C | -2.15965200 | 1.12979900  | 1.70103100  |
| C | -1.72351100 | 0.34047200  | 2.78718600  |
| C | -2.65752300 | 2.40760500  | 1.96324100  |
| C | -1.76947100 | 0.83986200  | 4.08998400  |
| C | -2.70966600 | 2.90982800  | 3.26115600  |
| H | -2.99973400 | 3.02291300  | 1.13272000  |
| C | -2.25920700 | 2.12375100  | 4.31764900  |
| H | -1.42815200 | 0.23357200  | 4.92426500  |
| H | -3.09768000 | 3.90928400  | 3.44292500  |
| H | -2.29064800 | 2.50545300  | 5.33639000  |
| C | -3.28547200 | -0.75469700 | -0.15685200 |
| C | -4.17049900 | -1.06739200 | 0.87544600  |
| C | -3.35628900 | -1.49391600 | -1.35497000 |
| C | -5.10657000 | -2.09116200 | 0.73575200  |
| H | -4.12250500 | -0.50380700 | 1.80604600  |
| C | -4.28776500 | -2.52200400 | -1.50070200 |
| C | -5.15742700 | -2.81462700 | -0.45181000 |
| H | -5.78897500 | -2.31931600 | 1.55119700  |
| H | -4.33590500 | -3.09405300 | -2.42342800 |
| H | -5.88138800 | -3.61854900 | -0.57222500 |
| C | -2.49859900 | 1.83111800  | -1.09088400 |
| C | -1.71533600 | 2.99928500  | -1.21012100 |
| C | -3.66209500 | 1.73778900  | -1.86013500 |
| C | -2.07810200 | 4.01545700  | -2.09807100 |
| C | -4.03408900 | 2.75062100  | -2.74104700 |
| H | -4.29186500 | 0.85601200  | -1.76854300 |

---

|    |             |             |             |
|----|-------------|-------------|-------------|
| C  | -3.23440000 | 3.88253100  | -2.86188000 |
| H  | -1.46648200 | 4.90883700  | -2.18688000 |
| H  | -4.94402300 | 2.65096800  | -3.32800700 |
| H  | -3.51058500 | 4.67894600  | -3.55044300 |
| P  | -1.94838600 | 0.47555400  | 0.01270100  |
| O  | -2.48552900 | -1.11642500 | -2.32420100 |
| O  | -0.63925000 | 3.05501000  | -0.39771900 |
| O  | -1.28060000 | -0.90553700 | 2.47325100  |
| C  | -0.60850700 | -1.64519400 | 3.48314400  |
| H  | -1.29424200 | -1.93169000 | 4.29040400  |
| H  | -0.22703700 | -2.54058800 | 2.98872300  |
| H  | 0.22897800  | -1.06897500 | 3.89803900  |
| C  | -2.26326300 | -2.02320200 | -3.39240300 |
| H  | -1.41437300 | -1.62421200 | -3.95063900 |
| H  | -2.01679300 | -3.02046800 | -3.00589600 |
| H  | -3.13734100 | -2.08618400 | -4.05329300 |
| C  | 0.24747900  | 4.15272600  | -0.52693100 |
| H  | 0.65286700  | 4.21530900  | -1.54588200 |
| H  | -0.25266200 | 5.09776600  | -0.27638500 |
| H  | 1.05758900  | 3.95895600  | 0.17988900  |
| Pd | 0.14064100  | -0.67650900 | -0.20414700 |
| O  | 0.55000200  | -3.72224300 | 0.73507300  |
| O  | -0.95209300 | -2.58995400 | -0.49407000 |
| C  | -0.61887300 | -3.57756300 | 0.19709600  |
| C  | -1.62129200 | -4.65492500 | 0.47113800  |
| C  | 1.28873100  | 0.89621800  | 0.23257500  |
| C  | 2.33783100  | 1.39383900  | -0.49703200 |
| S  | 1.36981200  | 1.56411100  | 1.83613100  |
| C  | 3.21290100  | 2.25908800  | 0.22613400  |
| C  | 2.82455900  | 2.45755900  | 1.52539300  |
| H  | 3.27287800  | 3.10476600  | 2.26902900  |
| O  | 2.56969500  | 1.05424300  | -1.81214300 |
| C  | 3.50368400  | 1.93275900  | -2.43245500 |
| H  | 3.02039100  | 2.89701300  | -2.65844200 |
| O  | 4.32872400  | 2.82287200  | -0.33693200 |
| C  | 4.70438200  | 2.15791200  | -1.54849500 |
| H  | 5.44134400  | 2.80427100  | -2.03212700 |
| H  | 5.17978000  | 1.19253500  | -1.30985000 |
| H  | 3.79503200  | 1.45516600  | -3.37269000 |
| C  | 4.32011200  | -1.66317100 | -0.59149700 |
| C  | 3.17249900  | -1.50821600 | 0.23283600  |
| C  | 4.00496700  | -2.10335000 | -1.85241900 |
| C  | 1.95014800  | -1.79342600 | -0.36865200 |
| S  | 2.30474300  | -2.29190500 | -2.02029600 |

---

|   |             |             |             |
|---|-------------|-------------|-------------|
| O | 5.58985000  | -1.39606600 | -0.16146800 |
| C | 5.57888100  | -0.61123000 | 1.03853500  |
| O | 3.26567900  | -1.13167700 | 1.53297100  |
| C | 4.60616400  | -1.17839500 | 2.03860600  |
| H | 4.69428900  | -2.32616400 | -2.65887300 |
| H | 6.60090400  | -0.63198800 | 1.42363800  |
| H | 5.30606800  | 0.42843100  | 0.79760000  |
| H | 4.59915400  | -0.58941600 | 2.95940500  |
| H | 1.19722200  | -2.84705900 | 0.32846600  |
| H | -2.20861800 | -4.36176500 | 1.35113600  |
| H | -2.31692300 | -4.74949600 | -0.36670800 |
| H | -1.14297000 | -5.61290600 | 0.68594400  |
| H | 4.86561500  | -2.21902800 | 2.28002100  |

Post-TS<sub>EE</sub>(L6)

-----  
M06-L electronic energy (Hartree): -3297.793799

M06-L thermal correction to free energy (Hartree): 0.556178

Three lowest frequencies (cm<sup>-1</sup>): 16.91, 26.96, 29.52  
-----

|   |             |             |             |
|---|-------------|-------------|-------------|
| C | -2.24907600 | 1.02556100  | 1.70724300  |
| C | -1.76951600 | 0.27162000  | 2.79996200  |
| C | -2.82858900 | 2.26989600  | 1.96162900  |
| C | -1.85853300 | 0.77153100  | 4.10028300  |
| C | -2.92155700 | 2.77412800  | 3.25673400  |
| H | -3.20548000 | 2.85848300  | 1.12680100  |
| C | -2.43064900 | 2.02261800  | 4.31965000  |
| H | -1.48544700 | 0.19291200  | 4.94038900  |
| H | -3.37354100 | 3.74778600  | 3.43069400  |
| H | -2.49342000 | 2.40494900  | 5.33670100  |
| C | -3.21431500 | -0.95293400 | -0.14334800 |
| C | -4.07246000 | -1.33979100 | 0.88628400  |
| C | -3.23465600 | -1.68341100 | -1.34884800 |
| C | -4.93023000 | -2.42930700 | 0.73844500  |
| H | -4.06601200 | -0.78184300 | 1.82153600  |
| C | -4.08738000 | -2.77646100 | -1.50346600 |
| C | -4.93072700 | -3.14309100 | -0.45581500 |
| H | -5.59178300 | -2.71517700 | 1.55292100  |
| H | -4.09656700 | -3.34015300 | -2.43259300 |
| H | -5.59373800 | -3.99697400 | -0.58304800 |
| C | -2.65732400 | 1.68385800  | -1.07856500 |
| C | -1.95846900 | 2.90063200  | -1.22885100 |

---

|    |             |             |             |
|----|-------------|-------------|-------------|
| C  | -3.83602900 | 1.50802900  | -1.80831900 |
| C  | -2.41889100 | 3.88616500  | -2.10612100 |
| C  | -4.30503000 | 2.48866600  | -2.67969400 |
| H  | -4.40163200 | 0.58619800  | -1.69293900 |
| C  | -3.58892500 | 3.67162300  | -2.82989900 |
| H  | -1.87268300 | 4.81833700  | -2.21941500 |
| H  | -5.22502400 | 2.32450700  | -3.23574300 |
| H  | -3.94145600 | 4.44429100  | -3.51064700 |
| P  | -1.97885100 | 0.38246700  | 0.02136600  |
| O  | -2.39687400 | -1.23233600 | -2.31665000 |
| O  | -0.86041300 | 3.03089400  | -0.45391600 |
| O  | -1.24060800 | -0.94395700 | 2.49514600  |
| C  | -0.57888300 | -1.65267700 | 3.53319000  |
| H  | -1.28267200 | -1.95819800 | 4.31763400  |
| H  | -0.14862100 | -2.53780100 | 3.06215300  |
| H  | 0.22190600  | -1.04497100 | 3.97451700  |
| C  | -2.11161900 | -2.10946400 | -3.39459800 |
| H  | -1.29709100 | -1.64282500 | -3.95156300 |
| H  | -1.78987400 | -3.08977600 | -3.01968000 |
| H  | -2.98112200 | -2.23146100 | -4.05320100 |
| C  | -0.07416400 | 4.20166200  | -0.59130600 |
| H  | 0.30272800  | 4.30669900  | -1.61761400 |
| H  | -0.64881400 | 5.09817100  | -0.32258800 |
| H  | 0.76391700  | 4.07360500  | 0.09761800  |
| Pd | 0.25048000  | -0.59091300 | -0.24037100 |
| O  | 0.69981200  | -3.64798900 | 0.85640100  |
| O  | -0.73127200 | -2.60062800 | -0.53004000 |
| C  | -0.44263300 | -3.55613600 | 0.19700400  |
| C  | -1.38401100 | -4.68466100 | 0.43543700  |
| C  | 1.29116100  | 1.04739500  | 0.20619900  |
| C  | 2.30612700  | 1.65164700  | -0.49119300 |
| S  | 1.24474700  | 1.72287200  | 1.80911400  |
| C  | 3.04618300  | 2.62086200  | 0.25349700  |
| C  | 2.59437900  | 2.77839600  | 1.53698700  |
| H  | 2.93796000  | 3.47893200  | 2.28799200  |
| O  | 2.62463500  | 1.34437000  | -1.79787300 |
| C  | 3.42723700  | 2.35972300  | -2.39452100 |
| H  | 2.81288300  | 3.24944300  | -2.60816900 |
| O  | 4.09049100  | 3.32842500  | -0.27998600 |
| C  | 4.57308200  | 2.73576400  | -1.48944400 |
| H  | 5.22353300  | 3.48152700  | -1.95395200 |
| H  | 5.16969000  | 1.84087100  | -1.25128300 |
| H  | 3.79141000  | 1.94757100  | -3.33964300 |
| C  | 4.42838300  | -1.85933600 | -0.56013000 |

---

|   |             |             |             |
|---|-------------|-------------|-------------|
| C | 3.29881100  | -1.36272300 | 0.16040900  |
| C | 4.09776000  | -2.36997500 | -1.78685400 |
| C | 2.08854500  | -1.47649300 | -0.49230300 |
| S | 2.39396000  | -2.23070700 | -2.04146900 |
| O | 5.70044800  | -1.83203900 | -0.05889900 |
| C | 5.81245200  | -0.92633200 | 1.04407400  |
| O | 3.42559000  | -0.82359000 | 1.41247500  |
| C | 4.68152300  | -1.13271100 | 2.01819400  |
| H | 4.75467500  | -2.84107200 | -2.50813100 |
| H | 6.78100200  | -1.13032600 | 1.50707400  |
| H | 5.80477200  | 0.11053200  | 0.67312800  |
| H | 4.77459200  | -0.46357300 | 2.87812900  |
| H | 1.25836800  | -2.85608300 | 0.58084300  |
| H | -1.95608600 | -4.46806400 | 1.34688900  |
| H | -2.09244300 | -4.76539900 | -0.39145700 |
| H | -0.85519400 | -5.62764100 | 0.59027500  |
| H | 4.67626100  | -2.17394100 | 2.37568800  |

Int<sub>EE</sub>(L7)

-----  
M06-L electronic energy (Hartree): -2471.027701

M06-L thermal correction to free energy (Hartree): 0.337646

Three lowest frequencies (cm<sup>-1</sup>): 10.78, 24.23, 33.73

-----

|    |             |             |             |
|----|-------------|-------------|-------------|
| Pd | 0.35219000  | 1.50369800  | 0.29189100  |
| O  | 0.54355600  | 3.68447400  | 0.54397400  |
| O  | 2.25534800  | 2.49900900  | -0.19604000 |
| C  | 1.75304900  | 3.61974900  | 0.14092400  |
| C  | 2.57907000  | 4.86628100  | 0.08718800  |
| C  | -1.52268800 | 1.11745300  | 0.78724800  |
| C  | -2.60024500 | 0.92788900  | -0.03966800 |
| S  | -2.04688300 | 1.05155400  | 2.44195000  |
| C  | -3.83903900 | 0.74842200  | 0.65185500  |
| C  | -3.70524000 | 0.78260200  | 2.01359600  |
| H  | -4.48230700 | 0.70682200  | 2.76394800  |
| O  | -2.51587900 | 0.93176500  | -1.41147900 |
| C  | -3.69186700 | 0.38711900  | -2.01820500 |
| H  | -3.67902900 | -0.70897400 | -1.92513500 |
| O  | -5.02426500 | 0.55901600  | -0.00120900 |
| C  | -4.93777000 | 0.94646000  | -1.37885000 |
| H  | -5.83779600 | 0.55387100  | -1.85845800 |
| H  | -4.94538700 | 2.04399000  | -1.45046400 |
| H  | -3.63862200 | 0.65312100  | -3.07690600 |
| H  | 2.02526900  | 5.67157200  | -0.40487900 |

---

|   |             |             |             |
|---|-------------|-------------|-------------|
| H | 2.79847300  | 5.20452500  | 1.10622700  |
| H | 3.52310200  | 4.69466000  | -0.43504600 |
| C | -0.57232600 | -1.71731500 | -0.85968400 |
| C | -1.66481200 | -2.17728400 | -0.11846600 |
| C | -0.53266300 | -2.06055900 | -2.21788300 |
| C | -2.67605700 | -2.94714700 | -0.66951700 |
| C | -1.54015300 | -2.82677900 | -2.79525500 |
| H | 0.30571300  | -1.73658700 | -2.82946700 |
| C | -2.61001700 | -3.27146600 | -2.02170300 |
| H | -3.49475700 | -3.27794400 | -0.03585300 |
| H | -1.48253500 | -3.08219800 | -3.85015100 |
| H | -3.39837200 | -3.87330000 | -2.46790800 |
| C | 1.27664500  | -1.62096500 | 1.35267500  |
| C | 1.04580300  | -2.99758400 | 1.48859500  |
| C | 2.02052200  | -0.99705300 | 2.35695500  |
| C | 1.52243800  | -3.69910700 | 2.58927100  |
| H | 0.48998900  | -3.52440300 | 0.71511000  |
| C | 2.50097700  | -1.67296800 | 3.46666400  |
| C | 2.24417400  | -3.03528100 | 3.58020000  |
| H | 1.33053500  | -4.76583300 | 2.67206100  |
| H | 3.06899400  | -1.13002100 | 4.21675300  |
| H | 2.61586000  | -3.57943300 | 4.44524600  |
| C | 2.13043800  | -0.74585200 | -1.23357400 |
| C | 2.14005700  | 0.03264200  | -2.39446800 |
| C | 3.27744100  | -1.50344100 | -0.95921200 |
| C | 3.21483500  | 0.07302900  | -3.26467900 |
| C | 4.37122600  | -1.47923700 | -1.81788900 |
| H | 3.31004800  | -2.11954200 | -0.06306700 |
| C | 4.33981200  | -0.69208500 | -2.96707700 |
| H | 3.16086000  | 0.69451700  | -4.15400700 |
| H | 5.24922400  | -2.07679000 | -1.58679600 |
| H | 5.19415600  | -0.66938600 | -3.63947600 |
| P | 0.70831300  | -0.67329300 | -0.09411700 |
| F | -1.72782900 | -1.89698800 | 1.19641400  |
| F | 2.30668900  | 0.31778600  | 2.24186900  |
| F | 1.04330800  | 0.76659300  | -2.68988100 |

Pre-TS<sub>EE</sub>(L7)

-----

M06-L electronic energy (Hartree): -3251.948276

M06-L thermal correction to free energy (Hartree): 0.444031

Three lowest frequencies (cm<sup>-1</sup>): 17.70, 23.03, 32.52

-----

---

|    |             |             |             |
|----|-------------|-------------|-------------|
| Pd | 0.06308600  | -1.00452200 | 0.11061200  |
| O  | -0.89237900 | -3.74655600 | 1.40682400  |
| O  | -1.26197300 | -2.58822600 | -0.49644800 |
| C  | -1.50210700 | -3.53924000 | 0.34370100  |
| C  | -2.66093900 | -4.43591300 | -0.04886000 |
| C  | 1.33588100  | 0.45777500  | 0.59596600  |
| C  | 2.06783500  | 1.25996000  | -0.24269300 |
| S  | 1.71259200  | 0.87194000  | 2.24084400  |
| C  | 2.92754700  | 2.18466700  | 0.42850000  |
| C  | 2.84489500  | 2.10593000  | 1.79384400  |
| H  | 3.39566300  | 2.67390000  | 2.53323000  |
| O  | 2.00031600  | 1.17613200  | -1.61453200 |
| C  | 2.65898300  | 2.26689000  | -2.25916500 |
| H  | 2.01068500  | 3.15663500  | -2.23844700 |
| O  | 3.75872000  | 3.03437400  | -0.24824800 |
| C  | 3.97433300  | 2.57628600  | -1.58933200 |
| H  | 4.50416800  | 3.38149900  | -2.10375700 |
| H  | 4.61192900  | 1.67784000  | -1.56999500 |
| H  | 2.80711700  | 1.96138600  | -3.29876000 |
| C  | 3.79434800  | -1.72978500 | -0.58221400 |
| C  | 2.94180400  | -2.16763800 | 0.46291300  |
| C  | 3.26660600  | -1.97567500 | -1.82529900 |
| C  | 1.69983100  | -2.62808400 | 0.01795800  |
| S  | 1.71355200  | -2.68933100 | -1.74408600 |
| O  | 4.99583800  | -1.14003900 | -0.35096600 |
| C  | 5.07884500  | -0.67000700 | 1.00574300  |
| O  | 3.28810400  | -2.13601600 | 1.75641400  |
| C  | 4.66300900  | -1.74704600 | 1.97125000  |
| H  | 3.69522500  | -1.68464400 | -2.77741000 |
| H  | 6.12178500  | -0.38814600 | 1.16429800  |
| H  | 4.43893600  | 0.21679800  | 1.12027800  |
| H  | 4.71000400  | -1.39313800 | 3.00323200  |
| H  | 1.06552900  | -3.32040600 | 0.57328000  |
| H  | -2.44090500 | -5.48159700 | 0.18813500  |
| H  | -3.54455900 | -4.15347800 | 0.53710700  |
| H  | -2.91605000 | -4.34144300 | -1.10822000 |
| H  | 5.29100700  | -2.64020300 | 1.86500900  |
| C  | -1.27698900 | 2.10778500  | -0.89658800 |
| C  | -0.58867400 | 3.14537000  | -0.25885600 |
| C  | -1.62454700 | 2.31432900  | -2.23884400 |
| C  | -0.24472800 | 4.32688300  | -0.89615600 |
| C  | -1.28521600 | 3.48924200  | -2.90201000 |
| H  | -2.17528400 | 1.54809100  | -2.77563600 |
| C  | -0.59277800 | 4.49547800  | -2.23259800 |

---

|   |             |             |             |
|---|-------------|-------------|-------------|
| H | 0.28276600  | 5.09496800  | -0.33639700 |
| H | -1.57114900 | 3.61849800  | -3.94293300 |
| H | -0.32641500 | 5.41671800  | -2.74592600 |
| C | -2.42553400 | 1.05868300  | 1.51969800  |
| C | -3.09874700 | 2.28412200  | 1.63054300  |
| C | -2.44003800 | 0.22057500  | 2.63503300  |
| C | -3.73723800 | 2.64919300  | 2.80890500  |
| H | -3.12155000 | 2.95576500  | 0.77358000  |
| C | -3.06349100 | 0.56479500  | 3.82495900  |
| C | -3.71467800 | 1.79075100  | 3.90755200  |
| H | -4.25293700 | 3.60432800  | 2.86976700  |
| H | -3.03623000 | -0.12874300 | 4.66089600  |
| H | -4.21090200 | 2.07181700  | 4.83369000  |
| C | -3.00770900 | -0.21321100 | -0.96354300 |
| C | -2.76538700 | -0.82372900 | -2.19584000 |
| C | -4.30354700 | -0.32051100 | -0.44248700 |
| C | -3.74227300 | -1.48945400 | -2.91417000 |
| C | -5.30304500 | -0.99281000 | -1.14019100 |
| H | -4.53220500 | 0.12814800  | 0.52212900  |
| C | -5.02339600 | -1.57407300 | -2.37445700 |
| H | -3.49097200 | -1.93689300 | -3.87211000 |
| H | -6.30220800 | -1.05921500 | -0.71674800 |
| H | -5.80180000 | -2.09909500 | -2.92326600 |
| P | -1.62809700 | 0.53530400  | -0.03304900 |
| F | -0.27498700 | 3.02220400  | 1.04387500  |
| F | -1.84030400 | -0.98500300 | 2.55947500  |
| F | -1.52210500 | -0.74489700 | -2.72107100 |

TS<sub>EE</sub>(L7)

-----

M06-L electronic energy (Hartree): -3251.920298

M06-L thermal correction to free energy (Hartree): 0.438874

Three lowest frequencies (cm<sup>-1</sup>): -610.18, 16.03, 25.61

-----

|    |             |             |             |
|----|-------------|-------------|-------------|
| Pd | 0.08785400  | -0.89169700 | 0.18746400  |
| O  | 0.54401200  | -4.03676800 | 0.82809000  |
| O  | -1.06993700 | -2.75705400 | -0.07877400 |
| C  | -0.65724600 | -3.84362900 | 0.38349500  |
| C  | -1.57583100 | -5.02239300 | 0.45932000  |
| C  | 1.14925900  | 0.73786700  | 0.60163700  |
| C  | 1.93046100  | 1.50015800  | -0.22588100 |
| S  | 1.34557100  | 1.29361700  | 2.23559100  |
| C  | 2.68473100  | 2.51168800  | 0.44610500  |

---

|   |             |             |             |
|---|-------------|-------------|-------------|
| C | 2.47929200  | 2.53045800  | 1.79998100  |
| H | 2.89680800  | 3.21112000  | 2.53137900  |
| O | 2.01579600  | 1.30430600  | -1.58616000 |
| C | 2.60012500  | 2.42643200  | -2.24562100 |
| H | 1.87087600  | 3.25005400  | -2.29701300 |
| O | 3.52652100  | 3.36609400  | -0.21507300 |
| C | 3.84360700  | 2.88699200  | -1.52643100 |
| H | 4.31844100  | 3.72248800  | -2.04744900 |
| H | 4.56529800  | 2.05810400  | -1.45148900 |
| H | 2.83339000  | 2.09768800  | -3.26206500 |
| C | 4.24753300  | -1.59054400 | -0.42858600 |
| C | 3.16269100  | -1.60344000 | 0.49396100  |
| C | 3.87299400  | -1.98020700 | -1.68855300 |
| C | 1.92545200  | -1.96242900 | -0.02944100 |
| S | 2.18820500  | -2.31938900 | -1.73796600 |
| O | 5.51390300  | -1.21663600 | -0.07836800 |
| C | 5.49779000  | -0.44845900 | 1.13103700  |
| O | 3.33053700  | -1.29310100 | 1.80424400  |
| C | 4.70322400  | -1.15907300 | 2.19445600  |
| H | 4.51176200  | -2.08995600 | -2.55764400 |
| H | 6.54124500  | -0.32598700 | 1.42956500  |
| H | 5.05801700  | 0.54200000  | 0.93277400  |
| H | 4.69434200  | -0.59122900 | 3.12869500  |
| H | 1.16012500  | -3.11848200 | 0.57262300  |
| H | -1.09017700 | -5.91438600 | 0.05326200  |
| H | -1.80971300 | -5.23382000 | 1.50857400  |
| H | -2.50572400 | -4.82309900 | -0.07717600 |
| H | 5.12405400  | -2.15629200 | 2.38489900  |
| C | -1.63425200 | 1.88732100  | -1.09647300 |
| C | -1.04793100 | 3.05513900  | -0.59820000 |
| C | -1.93473500 | 1.86932000  | -2.46616400 |
| C | -0.76060300 | 4.15386700  | -1.39284800 |
| C | -1.64874100 | 2.95658000  | -3.28563200 |
| H | -2.40808500 | 0.99250000  | -2.89985500 |
| C | -1.05780900 | 4.09874300  | -2.75064300 |
| H | -0.30919800 | 5.03099400  | -0.93608800 |
| H | -1.89640400 | 2.91055600  | -4.34315300 |
| H | -0.83095900 | 4.95224100  | -3.38538000 |
| C | -2.71494300 | 0.97759500  | 1.43517700  |
| C | -3.44667500 | 2.17186800  | 1.48128900  |
| C | -2.70538800 | 0.18996200  | 2.58774100  |
| C | -4.11712700 | 2.55809200  | 2.63588900  |
| H | -3.48829100 | 2.80123400  | 0.59372400  |
| C | -3.35975400 | 0.55444400  | 3.75354500  |

---

|   |             |             |             |
|---|-------------|-------------|-------------|
| C | -4.06867600 | 1.75137100  | 3.77220600  |
| H | -4.68022300 | 3.48799900  | 2.64792300  |
| H | -3.31451800 | -0.09996800 | 4.61955400  |
| H | -4.59102700 | 2.04906500  | 4.67851100  |
| C | -3.11823000 | -0.58436300 | -0.91726200 |
| C | -2.76775200 | -1.35111300 | -2.03106400 |
| C | -4.43380300 | -0.70596200 | -0.45065000 |
| C | -3.65191600 | -2.19631800 | -2.67752700 |
| C | -5.34302600 | -1.55170800 | -1.07939900 |
| H | -4.74808400 | -0.13117200 | 0.41823800  |
| C | -4.95252300 | -2.29609900 | -2.19006500 |
| H | -3.31697000 | -2.76275500 | -3.54213400 |
| H | -6.35866600 | -1.62756100 | -0.69882900 |
| H | -5.65910900 | -2.96008900 | -2.68274300 |
| P | -1.84240600 | 0.40121400  | -0.05467400 |
| F | -0.77556400 | 3.14599600  | 0.71670400  |
| F | -2.05249200 | -0.99357700 | 2.56741300  |
| F | -1.50535100 | -1.25539000 | -2.51167300 |

Post-TS<sub>EE</sub>(L7)

-----  
M06-L electronic energy (Hartree): -3251.930740

M06-L thermal correction to free energy (Hartree): 0.444550

Three lowest frequencies (cm<sup>-1</sup>): 19.50, 28.34, 32.73  
-----

|    |             |             |             |
|----|-------------|-------------|-------------|
| Pd | 0.66791300  | -0.31189500 | -0.41563000 |
| O  | 2.40492000  | -3.17252900 | -0.65337900 |
| O  | 0.41865100  | -2.35373500 | -1.31775700 |
| C  | 1.17290200  | -3.30900600 | -1.11195100 |
| C  | 0.75150600  | -4.71981100 | -1.32574400 |
| C  | 0.79895700  | 1.55353300  | 0.23861400  |
| C  | 0.28325300  | 2.64642100  | -0.40694900 |
| S  | 1.55892800  | 2.07434800  | 1.71082500  |
| C  | 0.44391300  | 3.87975500  | 0.29759300  |
| C  | 1.11623100  | 3.73735700  | 1.48063500  |
| H  | 1.36352200  | 4.50089200  | 2.20764700  |
| O  | -0.33021300 | 2.58017800  | -1.63975900 |
| C  | -1.14111400 | 3.73214600  | -1.87694400 |
| H  | -2.05125100 | 3.67278100  | -1.26172600 |
| O  | -0.05220000 | 5.06621900  | -0.16854000 |
| C  | -0.38184300 | 4.99727100  | -1.56092000 |
| H  | -0.98537000 | 5.88380600  | -1.77212100 |
| H  | 0.54126000  | 5.04533500  | -2.15787000 |
| H  | -1.42317900 | 3.69745200  | -2.93261900 |

---

|   |             |             |             |
|---|-------------|-------------|-------------|
| C | 5.01001400  | 0.02330600  | -0.38920600 |
| C | 3.72040300  | -0.31579600 | 0.12847400  |
| C | 4.96325100  | 0.44908500  | -1.68902800 |
| C | 2.67741900  | -0.18517600 | -0.76200000 |
| S | 3.32841800  | 0.41903600  | -2.25886300 |
| O | 6.15733300  | -0.08867200 | 0.34272700  |
| C | 5.88809700  | -0.23735600 | 1.74231400  |
| O | 3.55091300  | -0.76433300 | 1.41814500  |
| C | 4.78173600  | -1.23499300 | 1.97582800  |
| H | 5.79273100  | 0.73274800  | -2.32541800 |
| H | 6.82515500  | -0.57030100 | 2.19524900  |
| H | 5.61166300  | 0.73902400  | 2.16735300  |
| H | 4.59834700  | -1.37787100 | 3.04346100  |
| H | 2.59396000  | -2.19495700 | -0.59051500 |
| H | 1.54856000  | -5.30794400 | -1.78727100 |
| H | 0.53387700  | -5.17147800 | -0.35053700 |
| H | -0.15342300 | -4.75563400 | -1.93419000 |
| H | 5.04284200  | -2.20524700 | 1.52521200  |
| C | -2.72097100 | 1.02163000  | 0.15587700  |
| C | -2.56051100 | 2.00880800  | 1.13182200  |
| C | -3.70616600 | 1.24361000  | -0.81488300 |
| C | -3.33224400 | 3.15979100  | 1.17597400  |
| C | -4.49222900 | 2.39248100  | -0.79547000 |
| H | -3.87621100 | 0.49679500  | -1.58742700 |
| C | -4.30938600 | 3.34802200  | 0.20202500  |
| H | -3.16515900 | 3.88198100  | 1.97098800  |
| H | -5.25459000 | 2.53427700  | -1.55735600 |
| H | -4.92466800 | 4.24438400  | 0.22533500  |
| C | -1.97666300 | -1.18933900 | 1.81338600  |
| C | -3.09049000 | -0.84675200 | 2.59356300  |
| C | -1.11634500 | -2.15699100 | 2.33638400  |
| C | -3.31191100 | -1.43285100 | 3.83463100  |
| H | -3.79749300 | -0.11172200 | 2.21289200  |
| C | -1.31084500 | -2.75501400 | 3.57133800  |
| C | -2.41925200 | -2.38413200 | 4.32537900  |
| H | -4.18398200 | -1.14745500 | 4.41753900  |
| H | -0.60112700 | -3.49985300 | 3.92067200  |
| H | -2.58503500 | -2.84505100 | 5.29632400  |
| C | -2.53423900 | -1.62049400 | -0.94791000 |
| C | -2.34852200 | -1.50392000 | -2.32646900 |
| C | -3.33387000 | -2.67805100 | -0.49915800 |
| C | -2.92084900 | -2.36768500 | -3.24377800 |
| C | -3.91878100 | -3.56552200 | -1.39895000 |
| H | -3.49885800 | -2.80680000 | 0.56913200  |

---

|   |             |             |             |
|---|-------------|-------------|-------------|
| C | -3.71414700 | -3.40887800 | -2.76789600 |
| H | -2.74198200 | -2.21899000 | -4.30523200 |
| H | -4.53826400 | -4.37849100 | -1.02797200 |
| H | -4.16993500 | -4.09919000 | -3.47395600 |
| P | -1.65747000 | -0.46517000 | 0.16494800  |
| F | -1.65388700 | 1.81027000  | 2.10883000  |
| F | -0.04978000 | -2.55864500 | 1.60625200  |
| F | -1.58077000 | -0.48869900 | -2.78677000 |

Int<sub>EE</sub>(L8)

-----  
M06-L electronic energy (Hartree): -2471.036056

M06-L thermal correction to free energy (Hartree): 0.332689

Three lowest frequencies (cm<sup>-1</sup>): 10.19, 17.59, 26.48  
-----

|    |             |             |             |
|----|-------------|-------------|-------------|
| Pd | -0.44834300 | 1.78219700  | -0.06551600 |
| O  | -0.90419800 | 3.93594300  | 0.02418300  |
| O  | -2.48065000 | 2.45372000  | 0.47677300  |
| C  | -2.10697400 | 3.66764300  | 0.35046300  |
| C  | -3.09154700 | 4.77476700  | 0.55562600  |
| C  | 1.47689800  | 1.70302200  | -0.50350400 |
| C  | 2.51433200  | 1.17784500  | 0.22207000  |
| S  | 2.09774700  | 2.34760300  | -1.99556800 |
| C  | 3.79319500  | 1.29756500  | -0.40247300 |
| C  | 3.73474100  | 1.90983700  | -1.62577100 |
| H  | 4.55290500  | 2.15744800  | -2.29019200 |
| O  | 2.34945500  | 0.55906300  | 1.43734800  |
| C  | 3.46608100  | -0.28530200 | 1.73801000  |
| H  | 3.43579000  | -1.17499300 | 1.08966900  |
| O  | 4.94015500  | 0.82275000  | 0.16343300  |
| C  | 4.76065200  | 0.46225700  | 1.53969000  |
| H  | 5.62092300  | -0.15866900 | 1.80154800  |
| H  | 4.77482000  | 1.37063100  | 2.15939000  |
| H  | 3.34116500  | -0.59812900 | 2.77791000  |
| H  | -3.62603000 | 4.96122100  | -0.38324700 |
| H  | -3.83506000 | 4.50061900  | 1.30857400  |
| H  | -2.58902400 | 5.70100800  | 0.84459200  |
| C  | 0.85398900  | -1.55629500 | -0.32778900 |
| C  | 1.68572600  | -1.34222300 | -1.43693200 |
| C  | 1.10418500  | -2.64659300 | 0.51360400  |
| C  | 2.74946300  | -2.19550700 | -1.70137000 |
| C  | 2.16391500  | -3.51237600 | 0.25762600  |
| H  | 0.46901200  | -2.83144900 | 1.37787700  |
| C  | 2.96795200  | -3.26955800 | -0.84690300 |

---

|   |             |             |             |
|---|-------------|-------------|-------------|
| H | 2.36830400  | -4.36355300 | 0.90084400  |
| C | -1.78546400 | -0.99977800 | -1.30860600 |
| C | -1.67370900 | -2.23067300 | -1.96877600 |
| C | -2.88701400 | -0.17317300 | -1.57905000 |
| C | -2.64050700 | -2.63295500 | -2.88387500 |
| H | -0.82869500 | -2.88706900 | -1.76940100 |
| C | -3.86104800 | -0.56673500 | -2.48773600 |
| C | -3.71761100 | -1.79203500 | -3.12607800 |
| H | -2.56721100 | -3.58317200 | -3.40526700 |
| C | -1.27084100 | -0.95279900 | 1.54325900  |
| C | -0.64612400 | -0.48236700 | 2.70916800  |
| C | -2.39604400 | -1.77890900 | 1.64990400  |
| C | -1.12706900 | -0.84102100 | 3.96129400  |
| C | -2.89116500 | -2.13824000 | 2.89942800  |
| H | -2.89151300 | -2.15139500 | 0.75501600  |
| C | -2.24560000 | -1.66296000 | 4.03197600  |
| H | -3.76328700 | -2.77777500 | 3.00175000  |
| P | -0.57227200 | -0.46163500 | -0.06145400 |
| H | 0.22927100  | 0.16221400  | 2.62708400  |
| H | -2.98231500 | 0.78662600  | -1.07069300 |
| H | 1.50484800  | -0.49659400 | -2.09980700 |
| H | -0.65541200 | -0.48943200 | 4.87462100  |
| H | 3.40551600  | -2.03622200 | -2.55281000 |
| H | -4.71912600 | 0.06171900  | -2.70910300 |
| F | -4.65309100 | -2.17522000 | -4.01091100 |
| F | 3.99308400  | -4.10070700 | -1.09975800 |
| F | -2.72016300 | -2.00670300 | 5.24098400  |

Pre-TS<sub>EE</sub>(L8)

-----  
M06-L electronic energy (Hartree): -3251.956953  
M06-L thermal correction to free energy (Hartree): 0.436927  
Three lowest frequencies (cm<sup>-1</sup>): 11.04, 20.19, 24.98  
-----

|    |             |             |             |
|----|-------------|-------------|-------------|
| Pd | 0.53997400  | -0.74256900 | -0.73380000 |
| O  | -0.46182600 | -1.87459800 | -3.33933000 |
| O  | -0.46267600 | -2.58402900 | -1.20682000 |
| C  | -0.77469800 | -2.69202200 | -2.45501600 |
| C  | -1.57790800 | -3.93200900 | -2.78846500 |
| C  | 1.45298700  | 0.92936400  | -0.13159000 |
| C  | 1.45506400  | 2.15334200  | -0.74963900 |
| S  | 2.27098400  | 1.08033300  | 1.39793900  |
| C  | 2.12993200  | 3.18534200  | -0.02845500 |

---

|   |             |             |             |
|---|-------------|-------------|-------------|
| C | 2.62999200  | 2.76102600  | 1.17447700  |
| H | 3.20762700  | 3.32483800  | 1.89609700  |
| O | 0.84792700  | 2.38491200  | -1.96136700 |
| C | 0.62728700  | 3.78157700  | -2.17437900 |
| H | -0.20306300 | 4.12388400  | -1.53680200 |
| O | 2.22901800  | 4.46705900  | -0.48738400 |
| C | 1.87587000  | 4.57171100  | -1.87264500 |
| H | 1.72750300  | 5.63716700  | -2.06548300 |
| H | 2.71160800  | 4.21073200  | -2.49042300 |
| H | 0.33774900  | 3.88950600  | -3.22263600 |
| C | 4.03904500  | -1.37803600 | -0.15286800 |
| C | 2.92274800  | -2.16100500 | -0.55624500 |
| C | 4.40811100  | -0.46129900 | -1.10312800 |
| C | 2.37854800  | -1.74968700 | -1.77831700 |
| S | 3.40103700  | -0.52099900 | -2.48785800 |
| O | 4.64475200  | -1.54111200 | 1.05263300  |
| C | 3.79340200  | -2.26007200 | 1.95705600  |
| O | 2.46250200  | -3.20884900 | 0.15389700  |
| C | 3.27058300  | -3.51509200 | 1.31095200  |
| H | 5.18641100  | 0.28707600  | -1.01298500 |
| H | 4.40595000  | -2.49581400 | 2.82930700  |
| H | 2.96360000  | -1.60602500 | 2.26666600  |
| H | 2.61623400  | -4.06938200 | 1.98765500  |
| H | 1.77790700  | -2.36452200 | -2.43992800 |
| H | -0.97660000 | -4.83226700 | -2.61625500 |
| H | -2.45151800 | -4.00365200 | -2.12996100 |
| H | -1.91046400 | -3.92367700 | -3.82986300 |
| H | 4.09577600  | -4.16449500 | 0.99322700  |
| C | -1.68658000 | 1.81793300  | 0.41241200  |
| C | -0.93111700 | 2.65417400  | 1.24902100  |
| C | -2.68588000 | 2.38670900  | -0.38664300 |
| C | -1.17415300 | 4.02030100  | 1.30126200  |
| C | -2.93651800 | 3.75540100  | -0.34962800 |
| H | -3.29025300 | 1.76305800  | -1.04175000 |
| C | -2.17724800 | 4.54848400  | 0.49829100  |
| H | -3.71452200 | 4.20420100  | -0.96068200 |
| C | -1.20325500 | -0.48160600 | 2.09194400  |
| C | -1.95441700 | 0.13953400  | 3.09913000  |
| C | -0.36094500 | -1.55089600 | 2.42891100  |
| C | -1.86397300 | -0.29078100 | 4.41790200  |
| H | -2.61387400 | 0.97141300  | 2.85564800  |
| C | -0.26109800 | -1.99239100 | 3.74253300  |
| C | -1.01570500 | -1.34947500 | 4.71505400  |
| H | -2.43601500 | 0.18295900  | 5.21061300  |

---

|   |             |             |             |
|---|-------------|-------------|-------------|
| C | -2.81457500 | -0.73024400 | -0.32358200 |
| C | -3.00781500 | -0.69076400 | -1.71209700 |
| C | -3.76851700 | -1.35983100 | 0.48240600  |
| C | -4.14165300 | -1.24794800 | -2.28841400 |
| C | -4.90477900 | -1.93187900 | -0.08270300 |
| H | -3.63053800 | -1.41160400 | 1.56096100  |
| C | -5.07215700 | -1.86076400 | -1.45806800 |
| H | -5.65380400 | -2.42712800 | 0.52880600  |
| P | -1.30787500 | 0.03402700  | 0.35150400  |
| H | -2.24757300 | -0.24367000 | -2.35269000 |
| H | 0.22874000  | -2.03806000 | 1.64932700  |
| H | -0.14259500 | 2.23492300  | 1.87338500  |
| H | -4.30123400 | -1.22927300 | -3.36312400 |
| H | -0.59181800 | 4.67320200  | 1.94618400  |
| H | 0.39369900  | -2.81463200 | 4.01860600  |
| F | -0.91893500 | -1.76293200 | 5.98926900  |
| F | -2.41990000 | 5.87012200  | 0.54544800  |
| F | -6.16816800 | -2.41185300 | -2.00836400 |

TS<sub>EE</sub>(L8)

-----  
M06-L electronic energy (Hartree): -3251.930305

M06-L thermal correction to free energy (Hartree): 0.435596

Three lowest frequencies (cm<sup>-1</sup>): -786.48, 9.11, 19.11

-----

|    |             |             |             |
|----|-------------|-------------|-------------|
| Pd | 0.84160200  | -0.28621400 | -0.51697800 |
| O  | 2.56807300  | -2.39117200 | -2.30182400 |
| O  | 0.71662000  | -2.42113000 | -1.02658200 |
| C  | 1.51756900  | -2.96104300 | -1.83029600 |
| C  | 1.26539900  | -4.37392900 | -2.26367900 |
| C  | 0.86101600  | 1.64577800  | -0.08910600 |
| C  | 0.06269100  | 2.62316900  | -0.62074400 |
| S  | 1.90648400  | 2.36211700  | 1.10041500  |
| C  | 0.26331300  | 3.92431500  | -0.06532700 |
| C  | 1.23373900  | 3.95041100  | 0.89916300  |
| H  | 1.58005900  | 4.79699900  | 1.47868600  |
| O  | -0.88372900 | 2.37842200  | -1.59128100 |
| C  | -1.86685600 | 3.41744800  | -1.62826100 |
| H  | -2.52579800 | 3.33205700  | -0.75035500 |
| O  | -0.47447300 | 5.01032900  | -0.44284300 |
| C  | -1.20637500 | 4.77371900  | -1.65202900 |
| H  | -1.94852000 | 5.57367600  | -1.71549000 |
| H  | -0.52554800 | 4.85097800  | -2.51264400 |

---

|   |             |             |             |
|---|-------------|-------------|-------------|
| H | -2.45709900 | 3.24722300  | -2.53293000 |
| C | 4.99543500  | 0.44632300  | -0.01027100 |
| C | 3.82469300  | -0.35820300 | 0.00852400  |
| C | 5.00617600  | 1.31656700  | -1.07162200 |
| C | 2.91692100  | -0.13966000 | -1.02696200 |
| S | 3.57908800  | 1.15180800  | -2.01424900 |
| O | 5.98685900  | 0.34502200  | 0.92068100  |
| C | 5.53662500  | -0.35456800 | 2.08854200  |
| O | 3.60951300  | -1.30191100 | 0.96457500  |
| C | 4.79979500  | -1.61263900 | 1.70829600  |
| H | 5.79119600  | 2.01724800  | -1.33278100 |
| H | 6.43298900  | -0.58445600 | 2.66869200  |
| H | 4.88633000  | 0.30672300  | 2.68017100  |
| H | 4.46785700  | -2.16118600 | 2.59229500  |
| H | 2.69701400  | -1.32382200 | -1.76090300 |
| H | 1.71002900  | -5.05721700 | -1.53102800 |
| H | 0.19209000  | -4.57730300 | -2.29867800 |
| H | 1.72281700  | -4.57857600 | -3.23416500 |
| H | 5.44109100  | -2.26505600 | 1.10001400  |
| C | -2.38398300 | 0.90571700  | 0.74867300  |
| C | -1.84606500 | 1.82809700  | 1.66012300  |
| C | -3.70464600 | 1.07283000  | 0.31531700  |
| C | -2.60701200 | 2.89372800  | 2.12602400  |
| C | -4.47972800 | 2.13342400  | 0.77674100  |
| H | -4.14358800 | 0.36783600  | -0.38821100 |
| C | -3.91443800 | 3.02603000  | 1.67616800  |
| H | -5.50702000 | 2.26924900  | 0.44940600  |
| C | -1.41639700 | -1.60148100 | 1.68274500  |
| C | -2.59677000 | -1.74661000 | 2.42635100  |
| C | -0.27031600 | -2.30217300 | 2.07977700  |
| C | -2.64089900 | -2.58132200 | 3.53569700  |
| H | -3.49333900 | -1.19806200 | 2.13766500  |
| C | -0.29882900 | -3.14046200 | 3.18971800  |
| C | -1.48667500 | -3.26605100 | 3.89537200  |
| H | -3.54818000 | -2.70351000 | 4.12112700  |
| C | -2.34605400 | -1.34465700 | -1.05843400 |
| C | -2.48506500 | -0.70240700 | -2.29929600 |
| C | -2.89926900 | -2.61736200 | -0.88355800 |
| C | -3.18198500 | -1.30759000 | -3.33709000 |
| C | -3.59000700 | -3.24004700 | -1.91951800 |
| H | -2.79313900 | -3.13675600 | 0.06736800  |
| C | -3.72188100 | -2.57091400 | -3.12664300 |
| H | -4.02482200 | -4.22833700 | -1.79778100 |
| P | -1.35981000 | -0.50831000 | 0.22316800  |

---

|   |             |             |             |
|---|-------------|-------------|-------------|
| H | -2.04350600 | 0.28417200  | -2.44812500 |
| H | 0.65456900  | -2.18890900 | 1.51375600  |
| H | -0.81895200 | 1.71842200  | 2.00851500  |
| H | -3.30519000 | -0.82056600 | -4.30073100 |
| H | -2.19790900 | 3.61801900  | 2.82544600  |
| H | 0.58253700  | -3.68856500 | 3.51133100  |
| F | -1.52237600 | -4.07472000 | 4.96887000  |
| F | -4.65603500 | 4.05248600  | 2.13030300  |
| F | -4.39217800 | -3.16417700 | -4.13073300 |

Post-TS<sub>EE</sub>(L8)

-----

M06-L electronic energy (Hartree): -3251.938308

M06-L thermal correction to free energy (Hartree): 0.437029

Three lowest frequencies (cm<sup>-1</sup>): 14.04, 16.17, 20.94, 25.39

-----

|    |             |             |             |
|----|-------------|-------------|-------------|
| Pd | 0.88370500  | 0.17703500  | 0.31506100  |
| O  | 2.78406800  | -1.21263400 | -1.89583700 |
| O  | 1.58218300  | -1.90179200 | -0.12116400 |
| C  | 2.26559800  | -2.14974700 | -1.11943900 |
| C  | 2.59014400  | -3.53598100 | -1.54906100 |
| C  | 0.11516100  | 1.96778600  | 0.65326400  |
| C  | -0.61718300 | 2.71142800  | -0.23327300 |
| S  | 0.17153800  | 2.79970400  | 2.17573800  |
| C  | -1.14695200 | 3.92457600  | 0.30530500  |
| C  | -0.80982600 | 4.11905200  | 1.61741700  |
| H  | -1.08032200 | 4.94363700  | 2.26467300  |
| O  | -0.86188000 | 2.31605900  | -1.52918100 |
| C  | -2.00683900 | 2.98853600  | -2.06276800 |
| H  | -2.91898500 | 2.58405900  | -1.59649400 |
| O  | -1.94062400 | 4.76891800  | -0.41680500 |
| C  | -1.91090300 | 4.47406100  | -1.81910600 |
| H  | -2.76244000 | 5.00265900  | -2.25505700 |
| H  | -0.98309700 | 4.87175100  | -2.25638900 |
| H  | -2.02348500 | 2.76307900  | -3.13245900 |
| C  | 5.11606700  | 1.33928100  | 0.22459000  |
| C  | 4.00306100  | 0.46868800  | 0.44063300  |
| C  | 4.73689200  | 2.59292100  | -0.17242100 |
| C  | 2.76015600  | 1.02607300  | 0.21016100  |
| S  | 3.01436400  | 2.68826900  | -0.26034100 |
| O  | 6.41623200  | 0.94715000  | 0.38057200  |
| C  | 6.52921600  | -0.30479000 | 1.06542600  |
| O  | 4.18448900  | -0.83705900 | 0.83674700  |
| C  | 5.51056800  | -1.29121300 | 0.55388700  |

---

|   |             |             |             |
|---|-------------|-------------|-------------|
| H | 5.37657400  | 3.43542400  | -0.40544500 |
| H | 7.54852900  | -0.65621400 | 0.88612600  |
| H | 6.39193300  | -0.14643200 | 2.14531700  |
| H | 5.61373600  | -2.25981800 | 1.04958600  |
| H | 2.61843900  | -0.33250000 | -1.46190700 |
| H | 3.62037700  | -3.76970900 | -1.25578300 |
| H | 1.91830400  | -4.25018100 | -1.07153000 |
| H | 2.53370700  | -3.62842500 | -2.63691500 |
| H | 5.62725100  | -1.43150200 | -0.53258900 |
| C | -2.79925300 | 0.18409500  | 0.05850200  |
| C | -3.02128600 | 1.17722700  | 1.02482900  |
| C | -3.76530300 | -0.02424100 | -0.93362100 |
| C | -4.17931900 | 1.94582100  | 1.00447900  |
| C | -4.93085300 | 0.73684600  | -0.96576700 |
| H | -3.61496800 | -0.79074000 | -1.69183800 |
| C | -5.11599100 | 1.70954200  | 0.00655600  |
| H | -5.68886500 | 0.58158100  | -1.72848400 |
| C | -1.63465800 | -1.99860500 | 1.50073100  |
| C | -2.91402400 | -2.54428900 | 1.67924500  |
| C | -0.60241500 | -2.38207300 | 2.36653200  |
| C | -3.15970800 | -3.46022200 | 2.69457400  |
| H | -3.72938200 | -2.25020200 | 1.01852500  |
| C | -0.83256000 | -3.29787700 | 3.38781100  |
| C | -2.11012400 | -3.82041500 | 3.53092000  |
| H | -4.14505400 | -3.89187000 | 2.84682000  |
| C | -1.25635900 | -1.79472100 | -1.36870300 |
| C | -0.96152400 | -1.11766000 | -2.56331800 |
| C | -1.41135800 | -3.18423500 | -1.39328900 |
| C | -0.84274600 | -1.80961900 | -3.76197300 |
| C | -1.28618800 | -3.89145900 | -2.58634800 |
| H | -1.62493900 | -3.72867500 | -0.47489100 |
| C | -1.00568500 | -3.18980000 | -3.74933900 |
| H | -1.40089000 | -4.97142600 | -2.62029900 |
| P | -1.27665100 | -0.81186600 | 0.16634400  |
| H | -0.82087400 | -0.03522800 | -2.54735400 |
| H | 0.39302800  | -1.95672500 | 2.23830200  |
| H | -2.27744200 | 1.35988400  | 1.80044100  |
| H | -0.61903400 | -1.29917600 | -4.69472000 |
| H | -4.35579200 | 2.72359600  | 1.74287900  |
| H | -0.04330400 | -3.60208200 | 4.06958100  |
| F | -2.34393400 | -4.70265900 | 4.51789500  |
| F | -6.23980700 | 2.44874600  | -0.01859500 |
| F | -0.88055900 | -3.86797700 | -4.90459600 |

---

Int<sub>EE</sub>(L9)

-----  
M06-L electronic energy (Hartree): -2471.034477

M06-L thermal correction to free energy (Hartree): 0.334725

Three lowest frequencies (cm<sup>-1</sup>): 14.40, 21.68, 27.72  
-----

|    |             |             |             |
|----|-------------|-------------|-------------|
| Pd | -0.60532100 | 1.59584800  | -0.10036100 |
| O  | -1.21627700 | 3.70818000  | -0.05624700 |
| O  | -2.68871100 | 2.12388000  | 0.39836500  |
| C  | -2.39818700 | 3.36046700  | 0.27247300  |
| C  | -3.43553400 | 4.40261100  | 0.54313700  |
| C  | 1.32556600  | 1.65656700  | -0.51796400 |
| C  | 2.39058500  | 1.19322400  | 0.20923200  |
| S  | 1.90697900  | 2.31482600  | -2.01993800 |
| C  | 3.65949000  | 1.37088200  | -0.42118800 |
| C  | 3.56488900  | 1.96364600  | -1.65211800 |
| H  | 4.36749800  | 2.25204900  | -2.31906700 |
| O  | 2.25836600  | 0.56818600  | 1.42474600  |
| C  | 3.42271100  | -0.20582000 | 1.73664700  |
| H  | 3.44508100  | -1.10393300 | 1.09991800  |
| O  | 4.83076200  | 0.96438500  | 0.14746100  |
| C  | 4.67165200  | 0.61316800  | 1.52884300  |
| H  | 5.56606300  | 0.04645600  | 1.79891100  |
| H  | 4.63288400  | 1.52932200  | 2.13578300  |
| H  | 3.31434600  | -0.51181700 | 2.78041000  |
| H  | -3.41248600 | 4.66678400  | 1.60690700  |
| H  | -3.23707700 | 5.31185200  | -0.02968800 |
| H  | -4.43634100 | 4.02642300  | 0.31655500  |
| C  | 0.93380600  | -1.64730100 | -0.32477000 |
| C  | 1.73982800  | -1.34446800 | -1.42823100 |
| C  | 1.25711600  | -2.73250900 | 0.49754900  |
| C  | 2.85888200  | -2.12447800 | -1.67054800 |
| C  | 2.38251400  | -3.50694300 | 0.21749900  |
| H  | 0.63337400  | -2.97763500 | 1.35450300  |
| C  | 3.19872400  | -3.20699700 | -0.86934500 |
| H  | 2.62949300  | -4.35101400 | 0.85701400  |
| H  | 4.08546000  | -3.79162100 | -1.09799700 |
| C  | -1.76746900 | -1.31979800 | -1.24296100 |
| C  | -1.55129600 | -2.52823200 | -1.91582600 |
| C  | -2.95562300 | -0.60656700 | -1.45035800 |
| C  | -2.51884400 | -3.01879700 | -2.79085800 |
| H  | -0.63373600 | -3.09009300 | -1.75660600 |
| C  | -3.89642500 | -1.12514500 | -2.32493500 |
| C  | -3.70285800 | -2.32051700 | -3.00474300 |

---

|   |             |             |             |
|---|-------------|-------------|-------------|
| H | -2.34828600 | -3.95764900 | -3.31241700 |
| H | -4.46769900 | -2.68554100 | -3.68455200 |
| C | -1.18789600 | -1.17104900 | 1.59025700  |
| C | -0.58193300 | -0.61140500 | 2.72306200  |
| C | -2.22556500 | -2.09841800 | 1.73432000  |
| C | -1.02748200 | -1.00527700 | 3.97383500  |
| C | -2.65193800 | -2.46797600 | 3.00913800  |
| H | -2.69727800 | -2.53627200 | 0.85719900  |
| C | -2.05593000 | -1.92400800 | 4.14223700  |
| H | -3.45814400 | -3.18906500 | 3.12126400  |
| H | -2.37642900 | -2.19707600 | 5.14380800  |
| P | -0.56502500 | -0.65191400 | -0.04204600 |
| H | 0.22681500  | 0.11160000  | 2.62945900  |
| H | -3.14880200 | 0.33775100  | -0.94280300 |
| H | 1.51904000  | -0.50603500 | -2.08634600 |
| F | 3.64507000  | -1.81354600 | -2.71752700 |
| F | -5.03778400 | -0.44049700 | -2.52615400 |
| F | -0.44741000 | -0.47242000 | 5.06514000  |

Pre-TS<sub>EE</sub>(L9)

-----  
M06-L electronic energy (Hartree): -3251.954582

M06-L thermal correction to free energy (Hartree): 0.437467

Three lowest frequencies (cm<sup>-1</sup>): 7.63, 21.19, 24.52

-----

|    |             |             |             |
|----|-------------|-------------|-------------|
| Pd | 0.74032000  | -0.32894600 | -0.75040600 |
| O  | 0.20404600  | -2.07730800 | -3.06443100 |
| O  | 0.79068700  | -2.47872300 | -0.93355200 |
| C  | 0.41651600  | -2.85088800 | -2.11409700 |
| C  | 0.21054600  | -4.34167900 | -2.26484900 |
| C  | 0.62084700  | 1.64370800  | -0.45746500 |
| C  | -0.33808200 | 2.48080600  | -0.96945100 |
| S  | 1.55414300  | 2.52948500  | 0.71686400  |
| C  | -0.31148500 | 3.81124600  | -0.45263000 |
| C  | 0.66534900  | 3.99896700  | 0.49005100  |
| H  | 0.93276800  | 4.91423200  | 1.00304800  |
| O  | -1.28668300 | 2.06501500  | -1.87533200 |
| C  | -2.39989000 | 2.96322100  | -1.90920900 |
| H  | -3.00895700 | 2.82700300  | -1.00172400 |
| O  | -1.19410500 | 4.77651400  | -0.84197400 |
| C  | -1.93088200 | 4.39303000  | -2.01065100 |
| H  | -2.77592900 | 5.08330000  | -2.07262400 |
| H  | -1.29732900 | 4.52450800  | -2.90015800 |

---

|   |             |             |             |
|---|-------------|-------------|-------------|
| H | -2.99462500 | 2.68038500  | -2.78143800 |
| C | 4.13692000  | 0.82801900  | -0.52421100 |
| C | 3.48662000  | -0.41489900 | -0.75288400 |
| C | 3.98091900  | 1.70209700  | -1.56917900 |
| C | 2.73196200  | -0.43018500 | -1.93474300 |
| S | 3.02515800  | 1.04600900  | -2.82903100 |
| O | 4.81346400  | 1.09697200  | 0.62293500  |
| C | 4.45252000  | 0.16603800  | 1.65442800  |
| O | 3.62219400  | -1.47672800 | 0.06397600  |
| C | 4.55016700  | -1.24824100 | 1.14883200  |
| H | 4.32851600  | 2.72720500  | -1.61101200 |
| H | 5.14956700  | 0.33704700  | 2.47669800  |
| H | 3.42956200  | 0.38672500  | 1.99847200  |
| H | 4.27788600  | -1.96847500 | 1.92267700  |
| H | 2.46266300  | -1.32034800 | -2.49348000 |
| H | -0.72469500 | -4.62285200 | -1.76312800 |
| H | 0.13641000  | -4.62955100 | -3.31677000 |
| H | 1.01340000  | -4.90811800 | -1.78236700 |
| H | 5.56248800  | -1.46603600 | 0.78716800  |
| C | -2.31379700 | 0.68874300  | 0.95064800  |
| C | -1.85700500 | 1.82979100  | 1.62239000  |
| C | -3.66926600 | 0.58022000  | 0.61722400  |
| C | -2.76142800 | 2.83129700  | 1.93398800  |
| C | -4.55635700 | 1.60245200  | 0.95380000  |
| H | -4.04116200 | -0.30205200 | 0.10256500  |
| C | -4.11042200 | 2.74249700  | 1.61526400  |
| H | -5.60874500 | 1.50798000  | 0.69658900  |
| H | -4.78410000 | 3.55255300  | 1.88060000  |
| C | -0.54299000 | -1.19102500 | 2.20009500  |
| C | -1.39520900 | -1.17446500 | 3.31200500  |
| C | 0.77301100  | -1.64724400 | 2.33699400  |
| C | -0.93301700 | -1.61402800 | 4.55006100  |
| H | -2.41806400 | -0.81513100 | 3.21071500  |
| C | 1.20268100  | -2.07157200 | 3.58459900  |
| C | 0.37610900  | -2.06501700 | 4.69892500  |
| H | -1.59609900 | -1.60046100 | 5.41176700  |
| H | 0.75905100  | -2.40198900 | 5.65819300  |
| C | -2.12581600 | -1.96867600 | -0.13174600 |
| C | -2.51085900 | -1.84554800 | -1.47200300 |
| C | -2.52529600 | -3.08257700 | 0.61229000  |
| C | -3.29498900 | -2.84051300 | -2.03236500 |
| C | -3.31286500 | -4.06748400 | 0.01758100  |
| H | -2.22402100 | -3.18462600 | 1.65275100  |
| C | -3.70675700 | -3.95506100 | -1.31258900 |

---

|   |             |             |             |
|---|-------------|-------------|-------------|
| H | -3.62209900 | -4.93466500 | 0.59648900  |
| H | -4.31637000 | -4.71396700 | -1.79517700 |
| P | -1.10672300 | -0.62586400 | 0.55849300  |
| H | -2.18965000 | -1.00087700 | -2.07920300 |
| H | 1.45484700  | -1.66971500 | 1.48619100  |
| H | -0.81018900 | 1.95435900  | 1.89548300  |
| F | -2.31115000 | 3.93324600  | 2.56260500  |
| F | 2.47554900  | -2.49656600 | 3.71971000  |
| F | -3.66008300 | -2.72656700 | -3.32297600 |

TS<sub>EE</sub>(L9)

-----

M06-L electronic energy (Hartree): -3251.929235

M06-L thermal correction to free energy (Hartree): 0.435705

Three lowest frequencies (cm<sup>-1</sup>): -810.56, 8.47, 18.73

-----

|    |             |             |             |
|----|-------------|-------------|-------------|
| Pd | 0.72423800  | -0.36627200 | -0.47157700 |
| O  | 2.52976200  | -2.54121900 | -2.13045700 |
| O  | 0.62929400  | -2.51136300 | -0.92971300 |
| C  | 1.46873600  | -3.09208800 | -1.66377300 |
| C  | 1.24354000  | -4.53386500 | -2.00904400 |
| C  | 0.71366900  | 1.56888900  | -0.04412700 |
| C  | -0.12264200 | 2.52834900  | -0.54904600 |
| S  | 1.72182200  | 2.29342200  | 1.17475300  |
| C  | 0.01695200  | 3.81798400  | 0.05062700  |
| C  | 0.97993400  | 3.85530300  | 1.02204500  |
| H  | 1.29150600  | 4.69877000  | 1.62509100  |
| O  | -1.06099300 | 2.26969700  | -1.52394200 |
| C  | -2.07728100 | 3.27743500  | -1.55148400 |
| H  | -2.74794400 | 3.14756300  | -0.68825300 |
| O  | -0.76508400 | 4.88256400  | -0.29735900 |
| C  | -1.46469000 | 4.65556200  | -1.52723700 |
| H  | -2.23380900 | 5.43004800  | -1.58327700 |
| H  | -0.77036500 | 4.78116000  | -2.37120000 |
| H  | -2.64579100 | 3.11170900  | -2.47076800 |
| C  | 4.84938300  | 0.71016200  | -0.35974900 |
| C  | 3.75714500  | -0.17105000 | -0.13740600 |
| C  | 4.69830700  | 1.44104100  | -1.51158600 |
| C  | 2.75357700  | -0.15156300 | -1.10608600 |
| S  | 3.21852400  | 1.05752000  | -2.29293400 |
| O  | 5.91930100  | 0.80382800  | 0.47869700  |
| C  | 5.63005000  | 0.22686900  | 1.75945200  |
| O  | 3.70313300  | -0.99673200 | 0.94148800  |

---

|   |             |             |             |
|---|-------------|-------------|-------------|
| C | 4.97503200  | -1.12097800 | 1.60283100  |
| H | 5.39615300  | 2.16188300  | -1.92173200 |
| H | 6.58835100  | 0.14080900  | 2.27637300  |
| H | 4.97611000  | 0.90689900  | 2.32436100  |
| H | 4.76543600  | -1.57647600 | 2.57269400  |
| H | 2.60670900  | -1.41725000 | -1.68731500 |
| H | 0.17850400  | -4.72327300 | -2.16810000 |
| H | 1.81669400  | -4.82862800 | -2.89028800 |
| H | 1.56459500  | -5.15661000 | -1.16630700 |
| H | 5.61544500  | -1.79576600 | 1.01889200  |
| C | -2.51828700 | 0.75694300  | 0.83855400  |
| C | -1.97205100 | 1.69033700  | 1.72882100  |
| C | -3.85017100 | 0.89098900  | 0.42818900  |
| C | -2.76658100 | 2.73562800  | 2.17266800  |
| C | -4.62643800 | 1.94754800  | 0.90188600  |
| H | -4.28598500 | 0.17008300  | -0.26013200 |
| C | -4.08975200 | 2.88576000  | 1.77942400  |
| H | -5.66154400 | 2.04261100  | 0.58154100  |
| H | -4.67441100 | 3.72228400  | 2.15256100  |
| C | -1.52459000 | -1.74545400 | 1.75164800  |
| C | -2.71238500 | -1.92670100 | 2.47306000  |
| C | -0.35997900 | -2.40659600 | 2.15255800  |
| C | -2.73526700 | -2.77015600 | 3.57945700  |
| H | -3.61827600 | -1.40308900 | 2.16938900  |
| C | -0.41382600 | -3.23690600 | 3.26291700  |
| C | -1.58041000 | -3.43498400 | 3.98634400  |
| H | -3.65903100 | -2.91064200 | 4.13628600  |
| H | -1.57426100 | -4.09092800 | 4.85251800  |
| C | -2.44428500 | -1.47087400 | -0.99373800 |
| C | -2.57197500 | -0.80469900 | -2.22049700 |
| C | -2.99429100 | -2.74601000 | -0.83368400 |
| C | -3.26140000 | -1.42796900 | -3.24718500 |
| C | -3.67519500 | -3.34868200 | -1.89095000 |
| H | -2.89285800 | -3.27274300 | 0.11294400  |
| C | -3.81838100 | -2.69362100 | -3.10935500 |
| H | -4.10167400 | -4.34108600 | -1.76304200 |
| H | -4.34447500 | -3.14678800 | -3.94528100 |
| P | -1.46704200 | -0.63647600 | 0.29987300  |
| H | -2.13866200 | 0.18362800  | -2.37260800 |
| H | 0.57651900  | -2.27833900 | 1.61120400  |
| H | -0.93852300 | 1.62572300  | 2.06613000  |
| F | -2.22705800 | 3.64203900  | 3.00988700  |
| F | 0.71119900  | -3.86581400 | 3.65404100  |
| F | -3.38694300 | -0.78676100 | -4.42495700 |

---

Post-TS<sub>EE</sub>(L9)

-----  
M06-L electronic energy (Hartree): -3251.936619

M06-L thermal correction to free energy (Hartree): 0.438224

Three lowest frequencies (cm<sup>-1</sup>): 14.03, 16.39, 22.88  
-----

|    |             |             |             |
|----|-------------|-------------|-------------|
| Pd | 0.78024700  | -0.18084500 | -0.28030400 |
| O  | 2.80829800  | 0.94582700  | 1.97197900  |
| O  | 1.69504100  | 1.79916400  | 0.21097100  |
| C  | 2.39147100  | 1.95063300  | 1.21958000  |
| C  | 2.84433700  | 3.28567000  | 1.69267900  |
| C  | -0.17674200 | -1.87246700 | -0.64686200 |
| C  | -1.01273800 | -2.52314800 | 0.22083500  |
| S  | -0.20981100 | -2.68562900 | -2.18001100 |
| C  | -1.69482000 | -3.64545800 | -0.34255900 |
| C  | -1.36636100 | -3.86788800 | -1.65245000 |
| H  | -1.73629300 | -4.64023400 | -2.31475300 |
| O  | -1.22548000 | -2.10777700 | 1.51597300  |
| C  | -2.44807100 | -2.64009500 | 2.03718200  |
| H  | -3.30043100 | -2.11390500 | 1.58004600  |
| O  | -2.60807400 | -4.38102500 | 0.35709900  |
| C  | -2.54385600 | -4.12057200 | 1.76521500  |
| H  | -3.45824700 | -4.54179400 | 2.19049800  |
| H  | -1.67690700 | -4.64428600 | 2.19441900  |
| H  | -2.43723600 | -2.43448100 | 3.11090800  |
| C  | 4.85601900  | -1.78567900 | -0.20052900 |
| C  | 3.84031700  | -0.80085800 | -0.40434800 |
| C  | 4.34740200  | -2.99825600 | 0.17921200  |
| C  | 2.54652800  | -1.22972500 | -0.17941400 |
| S  | 2.62417700  | -2.91532800 | 0.26682100  |
| O  | 6.18987000  | -1.52855500 | -0.35113000 |
| C  | 6.43321100  | -0.28538200 | -1.01828300 |
| O  | 4.15596800  | 0.48405100  | -0.78201500 |
| C  | 5.52177800  | 0.79430500  | -0.49285700 |
| H  | 4.89523800  | -3.90590200 | 0.40129500  |
| H  | 7.48324500  | -0.04431900 | -0.83404800 |
| H  | 6.28175500  | -0.41358300 | -2.10023700 |
| H  | 5.72544700  | 1.75379400  | -0.97488300 |
| H  | 2.55603900  | 0.09852300  | 1.51494000  |
| H  | 2.27624000  | 4.07685600  | 1.20224500  |
| H  | 2.74426500  | 3.36357500  | 2.77877200  |
| H  | 3.90713500  | 3.41099500  | 1.45551300  |
| H  | 5.65054700  | 0.90636700  | 0.59545700  |

---

|   |             |             |             |
|---|-------------|-------------|-------------|
| C | -2.89240800 | 0.22616400  | -0.05731900 |
| C | -3.18937600 | -0.73559700 | -1.03128700 |
| C | -3.84729900 | 0.54123400  | 0.91727500  |
| C | -4.42559700 | -1.36180700 | -0.99871900 |
| C | -5.08589500 | -0.09896900 | 0.91635200  |
| H | -3.62766100 | 1.28899100  | 1.67655700  |
| C | -5.38706100 | -1.06234800 | -0.04276500 |
| H | -5.82508600 | 0.15359500  | 1.67311600  |
| H | -6.34256300 | -1.57943800 | -0.05566900 |
| C | -1.47864100 | 2.29693800  | -1.43900700 |
| C | -2.69431700 | 2.96650000  | -1.63037000 |
| C | -0.38489700 | 2.59159300  | -2.25926800 |
| C | -2.80975700 | 3.92854600  | -2.62990800 |
| H | -3.54941500 | 2.73403700  | -0.99696200 |
| C | -0.53150100 | 3.55487500  | -3.24646600 |
| C | -1.72515300 | 4.23207800  | -3.44997400 |
| H | -3.75377400 | 4.44823600  | -2.77683000 |
| H | -1.79620100 | 4.97559100  | -4.23906000 |
| C | -1.14916800 | 1.98391800  | 1.42869500  |
| C | -0.89761600 | 1.23880000  | 2.58979100  |
| C | -1.20424000 | 3.37874800  | 1.49497700  |
| C | -0.72204800 | 1.91191000  | 3.78737900  |
| C | -1.01563100 | 4.02583400  | 2.71624100  |
| H | -1.38771000 | 3.96325400  | 0.59565900  |
| C | -0.77251200 | 3.29772200  | 3.87639400  |
| H | -1.05603400 | 5.11175700  | 2.76434500  |
| H | -0.61890200 | 3.78320100  | 4.83618100  |
| P | -1.26151200 | 1.04234500  | -0.13132600 |
| H | -0.83103500 | 0.15073000  | 2.55665300  |
| H | 0.56747600  | 2.07889400  | -2.13462800 |
| H | -2.46899500 | -1.01457000 | -1.79892400 |
| F | -4.69607400 | -2.30226600 | -1.92375400 |
| F | 0.52108100  | 3.83559500  | -4.03799900 |
| F | -0.48018300 | 1.19737600  | 4.90339300  |

Int<sub>EE</sub>(L10)

-----

M06-L electronic energy (Hartree): -4195.889921

M06-L thermal correction to free energy (Hartree): 0.356038

Three lowest frequencies (cm<sup>-1</sup>): 11.81, 12.83, 13.62

-----

|    |             |             |            |
|----|-------------|-------------|------------|
| Pd | -0.17122300 | -0.32830000 | 2.48113700 |
| O  | -0.41443700 | -0.73705600 | 4.62607100 |
| O  | -2.18286600 | -0.53922000 | 3.32006400 |

---

|   |             |             |             |
|---|-------------|-------------|-------------|
| C | -1.68120400 | -0.74661600 | 4.47471500  |
| C | -2.56706300 | -1.01965300 | 5.64673600  |
| C | 1.79491400  | -0.24386200 | 2.19240100  |
| C | 2.63625200  | -1.30520100 | 1.96525900  |
| S | 2.71783800  | 1.23118600  | 2.19230100  |
| C | 4.01111000  | -0.93811200 | 1.82613900  |
| C | 4.21844400  | 0.41164300  | 1.92249000  |
| H | 5.15703700  | 0.94892900  | 1.87391100  |
| O | 2.21125300  | -2.60478800 | 1.86549700  |
| C | 3.19923900  | -3.44051400 | 1.24977000  |
| H | 3.21628700  | -3.25129800 | 0.16631800  |
| O | 4.99806400  | -1.84770900 | 1.59452200  |
| C | 4.56456300  | -3.19257900 | 1.83911500  |
| H | 5.31395900  | -3.83752300 | 1.37339500  |
| H | 4.55487900  | -3.37949000 | 2.92255100  |
| H | 2.87686800  | -4.46960800 | 1.42395400  |
| H | -3.61471500 | -0.82803200 | 5.40501700  |
| H | -2.46123800 | -2.06740100 | 5.94929300  |
| H | -2.26640400 | -0.40754400 | 6.50235200  |
| C | 0.68418400  | -0.91639200 | -0.84855200 |
| C | 2.04554000  | -0.61487600 | -1.01374600 |
| C | 0.14088700  | -2.01768200 | -1.50531900 |
| C | 2.83045600  | -1.40667400 | -1.84117700 |
| H | 2.49155700  | 0.23653200  | -0.50006800 |
| C | 0.94303300  | -2.80970000 | -2.32937900 |
| H | -0.91161000 | -2.27083200 | -1.38803900 |
| C | 2.28456100  | -2.50788000 | -2.50440300 |
| H | 2.90785600  | -3.12489300 | -3.14638100 |
| C | 0.05355000  | 1.80836900  | -0.14840800 |
| C | 0.44101700  | 2.18429900  | -1.43668900 |
| C | -0.05184300 | 2.78182600  | 0.84745700  |
| C | 0.72287900  | 3.52030700  | -1.71598000 |
| H | 0.52998700  | 1.44139700  | -2.22905000 |
| C | 0.23983700  | 4.11103300  | 0.56034200  |
| H | -0.34582600 | 2.49492300  | 1.85832100  |
| C | 0.63079600  | 4.48793700  | -0.72079500 |
| H | 0.86425600  | 5.52491600  | -0.94088000 |
| C | -2.04978300 | -0.19295000 | -0.24706600 |
| C | -2.75915000 | -1.24103000 | 0.34541700  |
| C | -2.67319600 | 0.59886700  | -1.21383100 |
| C | -4.07345600 | -1.49773800 | -0.03396700 |
| H | -2.28925500 | -1.84844900 | 1.11836100  |
| C | -3.99012100 | 0.33486400  | -1.58299800 |
| H | -2.14116400 | 1.42373900  | -1.68540400 |

---

|   |             |             |             |
|---|-------------|-------------|-------------|
| C | -4.69680000 | -0.71113700 | -0.99695200 |
| H | -5.72425100 | -0.90844000 | -1.28615200 |
| P | -0.32871000 | 0.08347300  | 0.29368900  |
| C | 0.16997600  | 5.10713900  | 1.67827500  |
| C | 1.14080400  | 3.88108500  | -3.11055600 |
| C | -4.63754100 | 1.22448500  | -2.60220400 |
| C | -4.79427300 | -2.62977900 | 0.63423900  |
| C | 0.31486100  | -3.98711100 | -3.01184200 |
| C | 4.29696700  | -1.14449000 | -2.01031400 |
| F | 5.02521200  | -2.17902600 | -1.53088200 |
| F | 4.62712600  | -1.01538100 | -3.31193000 |
| F | 4.70294200  | -0.03503300 | -1.37442900 |
| F | 1.18887800  | -4.66231000 | -3.77671400 |
| F | -0.19582800 | -4.85576500 | -2.11340300 |
| F | -0.70996100 | -3.60627000 | -3.80270300 |
| F | 0.21243600  | 3.49863400  | -4.01182700 |
| F | 1.33458800  | 5.20164200  | -3.26153500 |
| F | 2.28847300  | 3.25923500  | -3.45244900 |
| F | 0.38054800  | 6.36548800  | 1.25905900  |
| F | 1.09395700  | 4.83412600  | 2.62558900  |
| F | -1.03047500 | 5.07474400  | 2.29214100  |
| F | -6.05956100 | -2.75903400 | 0.20136500  |
| F | -4.16744400 | -3.80518400 | 0.41714700  |
| F | -4.83681000 | -2.45888300 | 1.97249100  |
| F | -5.83078700 | 0.75569100  | -3.00512800 |
| F | -3.86190600 | 1.36304600  | -3.69689500 |
| F | -4.83577100 | 2.46613700  | -2.11104000 |

Pre-TS<sub>EE</sub>(L10)

-----

M06-L electronic energy (Hartree): -4976.814069

M06-L thermal correction to free energy (Hartree): 0.460716

Three lowest frequencies (cm<sup>-1</sup>): 8.46, 10.29, 13.47

-----

|    |             |             |             |
|----|-------------|-------------|-------------|
| Pd | 0.96689900  | -0.66040700 | -1.56704500 |
| O  | -0.46248200 | -0.94370300 | -4.10253200 |
| O  | -0.23343300 | -2.28061900 | -2.31592900 |
| C  | -0.68894200 | -2.00548200 | -3.49489700 |
| C  | -1.53589200 | -3.09587200 | -4.11313800 |
| C  | 2.11572400  | 0.78057500  | -0.77919600 |
| C  | 2.20459400  | 2.08513500  | -1.19485200 |
| S  | 3.17350800  | 0.55701000  | 0.58540400  |
| C  | 3.15893800  | 2.87307800  | -0.47694600 |
| C  | 3.76391700  | 2.18433000  | 0.54061200  |

---

|   |             |             |             |
|---|-------------|-------------|-------------|
| H | 4.51950600  | 2.53626400  | 1.23146800  |
| O | 1.44905300  | 2.60945100  | -2.21350500 |
| C | 1.43902200  | 4.03995600  | -2.16412900 |
| H | 0.82138200  | 4.37610900  | -1.31591500 |
| O | 3.42553600  | 4.17407400  | -0.78049300 |
| C | 2.84118500  | 4.57602900  | -2.02568300 |
| H | 2.84975900  | 5.66895900  | -2.02233800 |
| H | 3.46783500  | 4.21586800  | -2.85530700 |
| H | 0.97689900  | 4.37473500  | -3.09555400 |
| C | 4.58495300  | -1.28499600 | -1.91777700 |
| C | 3.40544600  | -2.04387600 | -2.13341000 |
| C | 4.66555600  | -0.19836100 | -2.75439300 |
| C | 2.53542700  | -1.46082700 | -3.06673300 |
| S | 3.32048100  | -0.07722100 | -3.80441000 |
| O | 5.51248800  | -1.61745200 | -0.98432500 |
| C | 4.98020900  | -2.56528400 | -0.04583400 |
| O | 3.15583400  | -3.21228700 | -1.51536400 |
| C | 4.29151000  | -3.69646800 | -0.76060400 |
| H | 5.43304600  | 0.56696200  | -2.74422200 |
| H | 5.82970400  | -2.92907300 | 0.53585700  |
| H | 4.27995500  | -2.04813000 | 0.62469800  |
| H | 3.88870200  | -4.42679300 | -0.05798100 |
| H | 1.83554200  | -2.02643100 | -3.67174900 |
| H | -0.90029800 | -3.94302300 | -4.39663900 |
| H | -2.26737500 | -3.47713900 | -3.39196300 |
| H | -2.05725000 | -2.73601800 | -5.00369800 |
| H | 4.97577300  | -4.19871000 | -1.45532800 |
| C | -0.83510600 | 1.65517900  | 0.43771200  |
| C | 0.11128200  | 2.39224000  | 1.16607600  |
| C | -1.97700300 | 2.29718100  | -0.03803000 |
| C | -0.10835400 | 3.73917300  | 1.42337300  |
| H | 1.01285600  | 1.91375800  | 1.54667100  |
| C | -2.17800800 | 3.65564100  | 0.21245700  |
| H | -2.72907600 | 1.74905100  | -0.60259400 |
| C | -1.25095500 | 4.38193000  | 0.94455300  |
| H | -1.41369100 | 5.43719400  | 1.14658800  |
| C | 0.02155500  | -0.85298100 | 1.62110700  |
| C | -0.33694000 | -0.35085500 | 2.87199100  |
| C | 0.80882500  | -2.00802700 | 1.54310400  |
| C | 0.10199900  | -0.99160800 | 4.03125300  |
| H | -0.95901700 | 0.53989700  | 2.95505800  |
| C | 1.22586700  | -2.64815300 | 2.70366900  |
| H | 1.09642500  | -2.40157200 | 0.56567800  |
| C | 0.88230800  | -2.13854900 | 3.95485900  |

---

|   |             |             |             |
|---|-------------|-------------|-------------|
| H | 1.21441000  | -2.63647300 | 4.86113000  |
| C | -2.18072800 | -0.79446800 | -0.25511100 |
| C | -2.70958500 | -0.68064200 | -1.54808800 |
| C | -2.91844200 | -1.43863100 | 0.73455500  |
| C | -3.96569900 | -1.19837400 | -1.83158900 |
| H | -2.12645400 | -0.20439700 | -2.33611700 |
| C | -4.17859600 | -1.96232600 | 0.43601400  |
| H | -2.52301800 | -1.54647500 | 1.74346500  |
| C | -4.70655500 | -1.84566400 | -0.84115800 |
| H | -5.68410000 | -2.26141300 | -1.07116600 |
| P | -0.51813300 | -0.10203300 | 0.04849600  |
| C | 2.09597300  | -3.86463500 | 2.60620200  |
| C | -0.29255500 | -0.41030800 | 5.35630000  |
| C | -4.93365000 | -2.65866500 | 1.52785500  |
| C | -4.55349800 | -1.09681700 | -3.20699600 |
| C | -3.41988200 | 4.29889200  | -0.32587400 |
| C | 0.90802400  | 4.55406700  | 2.16429500  |
| F | 1.58763700  | 5.36073000  | 1.31935000  |
| F | 0.32523300  | 5.35780600  | 3.07798500  |
| F | 1.80982200  | 3.79422800  | 2.80773300  |
| F | -3.51194500 | 5.59685300  | 0.00952400  |
| F | -3.46475400 | 4.22346300  | -1.67315700 |
| F | -4.53003200 | 3.68087000  | 0.12952700  |
| F | -1.63370400 | -0.31495800 | 5.46749000  |
| F | 0.15015400  | -1.14459100 | 6.39045200  |
| F | 0.19598400  | 0.83867500  | 5.50490500  |
| F | 1.92599500  | -4.69147600 | 3.65112800  |
| F | 3.40917800  | -3.53431000 | 2.57642800  |
| F | 1.84958500  | -4.56579300 | 1.48065100  |
| F | -4.87626500 | -2.31648600 | -3.68988900 |
| F | -5.69146700 | -0.37192600 | -3.20308600 |
| F | -3.71066800 | -0.52596600 | -4.08422100 |
| F | -6.13205100 | -3.10725100 | 1.11796800  |
| F | -5.14380900 | -1.83741300 | 2.57809500  |
| F | -4.24314400 | -3.71751500 | 2.00118100  |

TS<sub>EE</sub>(L10)

-----

M06-L electronic energy (Hartree): -4976.788801

M06-L thermal correction to free energy (Hartree): 0.456481

Three lowest frequencies (cm<sup>-1</sup>): -759.80, 10.59, 11.56

-----

|    |            |             |             |
|----|------------|-------------|-------------|
| Pd | 1.25332000 | -0.83776700 | -1.17873200 |
| O  | 2.10241900 | -3.57181800 | -2.79519500 |

---

|   |             |             |             |
|---|-------------|-------------|-------------|
| O | 0.39052700  | -2.80643800 | -1.55562500 |
| C | 0.91852400  | -3.66476000 | -2.30800700 |
| C | 0.10967300  | -4.86333600 | -2.70271500 |
| C | 1.99122200  | 0.98253800  | -0.83617700 |
| C | 1.84873300  | 2.09774500  | -1.62084400 |
| S | 2.99516800  | 1.37651500  | 0.52752700  |
| C | 2.52185700  | 3.25750100  | -1.12452400 |
| C | 3.19597000  | 3.02902800  | 0.04402200  |
| H | 3.74965900  | 3.73735700  | 0.64716700  |
| O | 1.12983700  | 2.11408000  | -2.79331500 |
| C | 0.79281900  | 3.44828900  | -3.18520500 |
| H | -0.01631900 | 3.82856100  | -2.54347700 |
| O | 2.45937100  | 4.47018600  | -1.74665400 |
| C | 1.99120100  | 4.35994400  | -3.09614000 |
| H | 1.73419500  | 5.37562900  | -3.40829100 |
| H | 2.80464400  | 3.98440500  | -3.73462300 |
| H | 0.42686700  | 3.38142000  | -4.21266800 |
| C | 5.45881100  | -1.22518700 | -1.15298100 |
| C | 4.13536800  | -1.66517100 | -0.88435500 |
| C | 5.55103400  | -0.56917600 | -2.35576300 |
| C | 3.18970800  | -1.38308300 | -1.87182600 |
| S | 4.02193500  | -0.48658200 | -3.13306900 |
| O | 6.50708900  | -1.43940400 | -0.31015600 |
| C | 6.05626000  | -1.78886900 | 1.00583000  |
| O | 3.81171000  | -2.32502700 | 0.25983600  |
| C | 4.97332100  | -2.83429400 | 0.94266800  |
| H | 6.44806000  | -0.16293500 | -2.80886300 |
| H | 6.93380500  | -2.16526700 | 1.53615100  |
| H | 5.68820200  | -0.88638300 | 1.51433600  |
| H | 4.63401400  | -3.11574300 | 1.94032200  |
| H | 2.59725900  | -2.55114800 | -2.38935700 |
| H | -0.58511200 | -5.13792000 | -1.90508800 |
| H | -0.48977500 | -4.60608200 | -3.58440000 |
| H | 0.74746200  | -5.71056900 | -2.96312500 |
| H | 5.33032000  | -3.72918400 | 0.41558100  |
| C | -1.35798500 | 1.48797400  | -0.28363700 |
| C | -0.67769200 | 2.62726000  | 0.17734300  |
| C | -2.53423200 | 1.64460400  | -1.01383200 |
| C | -1.19258100 | 3.89116500  | -0.08426200 |
| H | 0.24868100  | 2.52789700  | 0.74196200  |
| C | -3.03854900 | 2.92009900  | -1.27318500 |
| H | -3.07817800 | 0.77535300  | -1.38057300 |
| C | -2.37589500 | 4.04599200  | -0.80849900 |
| H | -2.76976400 | 5.03882500  | -1.00955200 |

---

|   |             |             |             |
|---|-------------|-------------|-------------|
| C | -0.19934500 | -0.14101800 | 1.77387700  |
| C | -0.92605400 | 0.57149900  | 2.73109100  |
| C | 0.93145600  | -0.85750300 | 2.17281200  |
| C | -0.52374300 | 0.55869200  | 4.06585800  |
| H | -1.80448300 | 1.14856900  | 2.44171500  |
| C | 1.32843200  | -0.85973500 | 3.50582800  |
| H | 1.52376000  | -1.39845000 | 1.43126600  |
| C | 0.60563900  | -0.15255300 | 4.46081600  |
| H | 0.92131600  | -0.14849200 | 5.49949500  |
| C | -2.05895800 | -1.30731600 | -0.12951000 |
| C | -2.33784400 | -1.83732300 | -1.39670700 |
| C | -2.82584800 | -1.70836700 | 0.96202600  |
| C | -3.37019600 | -2.75006900 | -1.55919600 |
| H | -1.72845000 | -1.55077800 | -2.25030600 |
| C | -3.86678900 | -2.62290700 | 0.78728700  |
| H | -2.62017700 | -1.32217200 | 1.95936700  |
| C | -4.14135200 | -3.14934100 | -0.46697500 |
| H | -4.94339100 | -3.87162300 | -0.59540800 |
| P | -0.63762700 | -0.16653100 | 0.00121900  |
| C | 2.58294000  | -1.59643800 | 3.85950100  |
| C | -1.34291600 | 1.32176600  | 5.06317200  |
| C | -4.66744300 | -3.02360300 | 1.98916200  |
| C | -3.64472700 | -3.37073100 | -2.89485600 |
| C | -4.30707400 | 3.03476500  | -2.06227600 |
| C | -0.47959300 | 5.13373200  | 0.35674800  |
| F | -0.11525700 | 5.88073400  | -0.71076900 |
| F | -1.27694400 | 5.91649500  | 1.11474900  |
| F | 0.62854900  | 4.87465800  | 1.06735200  |
| F | -4.70076500 | 4.31005600  | -2.21952100 |
| F | -4.16700500 | 2.49873700  | -3.29384300 |
| F | -5.31836300 | 2.36720700  | -1.46752600 |
| F | -2.58624500 | 0.80629700  | 5.16965700  |
| F | -0.79594400 | 1.31250600  | 6.29062000  |
| F | -1.49205400 | 2.61043100  | 4.69252800  |
| F | 2.80371200  | -1.63999800 | 5.18228600  |
| F | 3.66444100  | -1.01723500 | 3.28613600  |
| F | 2.55251800  | -2.86922500 | 3.40580100  |
| F | -3.43992200 | -4.70628000 | -2.86068000 |
| F | -4.92508100 | -3.18763000 | -3.27557400 |
| F | -2.85598300 | -2.87182800 | -3.86451300 |
| F | -5.62952800 | -3.91377300 | 1.69231400  |
| F | -5.26427000 | -1.95497200 | 2.55848900  |
| F | -3.88264300 | -3.57489700 | 2.93914900  |

---

Post-TS<sub>EE</sub>(L10)

-----  
M06-L electronic energy (Hartree): -4976.794001

M06-L thermal correction to free energy (Hartree): 0.460099

Three lowest frequencies (cm<sup>-1</sup>): 10.73, 11.29, 11.94  
-----

|    |             |             |             |
|----|-------------|-------------|-------------|
| Pd | 1.38477700  | -0.61431800 | -1.17152400 |
| O  | 2.44949600  | -3.31581100 | -2.90629700 |
| O  | 0.74872600  | -2.70992100 | -1.56525000 |
| C  | 1.27766200  | -3.51341600 | -2.34659600 |
| C  | 0.59442800  | -4.77418000 | -2.74974700 |
| C  | 1.88668600  | 1.27604100  | -0.81794100 |
| C  | 1.62554300  | 2.36407000  | -1.60981400 |
| S  | 2.81997200  | 1.78513900  | 0.55682700  |
| C  | 2.14075600  | 3.59749400  | -1.10174900 |
| C  | 2.82074200  | 3.45154200  | 0.07654800  |
| H  | 3.26505300  | 4.22305900  | 0.69258900  |
| O  | 0.93745200  | 2.29220100  | -2.79861200 |
| C  | 0.43641600  | 3.57347300  | -3.19206500 |
| H  | -0.42565300 | 3.84134900  | -2.56269000 |
| O  | 1.93559900  | 4.79465700  | -1.72327700 |
| C  | 1.50497800  | 4.63232500  | -3.07989400 |
| H  | 1.12263600  | 5.60792000  | -3.39165100 |
| H  | 2.36939100  | 4.36972800  | -3.70767900 |
| H  | 0.09955200  | 3.46559700  | -4.22596600 |
| C  | 5.64675500  | -1.01685800 | -1.15246900 |
| C  | 4.28904000  | -1.31291400 | -0.83279400 |
| C  | 5.76746900  | -0.29867600 | -2.31356600 |
| C  | 3.35271900  | -0.85820300 | -1.74201100 |
| S  | 4.20864200  | 0.01527000  | -2.98658700 |
| O  | 6.69734000  | -1.41595600 | -0.37748700 |
| C  | 6.26709300  | -1.76372500 | 0.94479300  |
| O  | 3.94005400  | -1.98431100 | 0.31080600  |
| C  | 5.05885100  | -2.66357000 | 0.89817100  |
| H  | 6.68078900  | 0.00806400  | -2.80909700 |
| H  | 7.11530100  | -2.26541700 | 1.41647000  |
| H  | 6.03460200  | -0.84646700 | 1.50669400  |
| H  | 4.74343400  | -2.95189700 | 1.90270700  |
| H  | 2.81056700  | -2.43255100 | -2.56539900 |
| H  | -0.08740200 | -5.10389400 | -1.96351900 |
| H  | -0.00285000 | -4.57675400 | -3.64817000 |
| H  | 1.31277400  | -5.55995600 | -2.99156800 |
| H  | 5.28039000  | -3.56966700 | 0.31573500  |
| C  | -1.54345600 | 1.35352900  | -0.29813700 |

---

|   |             |             |             |
|---|-------------|-------------|-------------|
| C | -1.00693600 | 2.56805500  | 0.16044300  |
| C | -2.72345700 | 1.36712500  | -1.03907300 |
| C | -1.66546400 | 3.76102500  | -0.11276700 |
| H | -0.08109900 | 2.58231600  | 0.73422200  |
| C | -3.37194600 | 2.57260600  | -1.31162200 |
| H | -3.15824100 | 0.43804000  | -1.40481000 |
| C | -2.85149800 | 3.77173100  | -0.84863600 |
| H | -3.35826400 | 4.70982600  | -1.05937700 |
| C | -0.19187500 | -0.11525700 | 1.76380100  |
| C | -0.99148300 | 0.51587500  | 2.71983700  |
| C | 1.01313400  | -0.69901800 | 2.16376600  |
| C | -0.58643300 | 0.55694900  | 4.05321500  |
| H | -1.93085800 | 0.98779900  | 2.43099200  |
| C | 1.40993900  | -0.65177200 | 3.49643300  |
| H | 1.66308600  | -1.17145800 | 1.42323800  |
| C | 0.61528500  | -0.02310000 | 4.44931900  |
| H | 0.92972700  | 0.02043700  | 5.48743500  |
| C | -1.90250800 | -1.50359300 | -0.12529900 |
| C | -2.13078200 | -2.06300800 | -1.39018200 |
| C | -2.60481600 | -1.99452500 | 0.97330200  |
| C | -3.05266300 | -3.08895900 | -1.54421400 |
| H | -1.56926200 | -1.70597100 | -2.25068000 |
| C | -3.53142000 | -3.02619900 | 0.80830600  |
| H | -2.43441700 | -1.58799300 | 1.96920800  |
| C | -3.75842100 | -3.57825100 | -0.44446200 |
| H | -4.47152700 | -4.38946200 | -0.56621200 |
| P | -0.62567700 | -0.19989500 | -0.00951000 |
| C | 2.72816600  | -1.26540600 | 3.85630900  |
| C | -1.48016700 | 1.23763200  | 5.04577700  |
| C | -4.27183100 | -3.51511000 | 2.01638000  |
| C | -3.27045800 | -3.73541100 | -2.87819200 |
| C | -4.64158900 | 2.53093900  | -2.10601000 |
| C | -1.11058300 | 5.08013300  | 0.33286100  |
| F | -0.82149300 | 5.86342500  | -0.73158700 |
| F | -2.00560200 | 5.76458300  | 1.07706200  |
| F | 0.01000300  | 4.95520800  | 1.06035100  |
| F | -5.15949700 | 3.75399500  | -2.31158100 |
| F | -4.44375800 | 1.96513800  | -3.31614800 |
| F | -5.58467200 | 1.78922000  | -1.48711200 |
| F | -2.67981700 | 0.62318200  | 5.12464300  |
| F | -0.95428200 | 1.25680200  | 6.28226600  |
| F | -1.72667700 | 2.51539700  | 4.68825000  |
| F | 2.97840900  | -1.21700500 | 5.17462900  |
| F | 3.74933300  | -0.64252600 | 3.22575100  |

---

|   |             |             |             |
|---|-------------|-------------|-------------|
| F | 2.78369600  | -2.56258000 | 3.47771500  |
| F | -2.88563800 | -5.03139100 | -2.85768100 |
| F | -4.57169400 | -3.72664300 | -3.22931800 |
| F | -2.57843400 | -3.13073700 | -3.86125400 |
| F | -5.07214800 | -4.55901500 | 1.74050400  |
| F | -5.04346100 | -2.54158600 | 2.54497800  |
| F | -3.42057100 | -3.90050400 | 2.99022100  |

Int<sub>EE</sub>(L11)

-----

M06-L electronic energy (Hartree): -3661.990729

M06-L thermal correction to free energy (Hartree): 0.224226

Three lowest frequencies (cm<sup>-1</sup>): 14.75, 17.10, 23.43

-----

|    |             |             |             |
|----|-------------|-------------|-------------|
| Pd | 0.20332800  | -1.43028900 | -1.54818900 |
| O  | 0.62079700  | -2.98693000 | -3.01560400 |
| O  | 2.27894200  | -2.06418500 | -1.88662900 |
| C  | 1.86847100  | -2.90682000 | -2.75143500 |
| C  | 2.83168400  | -3.82189300 | -3.43336700 |
| C  | -1.77090700 | -1.27686000 | -1.61805700 |
| C  | -2.72298500 | -1.57667400 | -0.67718500 |
| S  | -2.54622100 | -0.71168200 | -3.06613600 |
| C  | -4.06534600 | -1.36468100 | -1.12176600 |
| C  | -4.13672700 | -0.88650300 | -2.40222100 |
| H  | -5.02197700 | -0.67556500 | -2.98877000 |
| O  | -2.43362600 | -2.06199700 | 0.57257400  |
| C  | -3.54784800 | -1.93927900 | 1.45847600  |
| H  | -3.66224400 | -0.88607100 | 1.76051100  |
| O  | -5.14978600 | -1.61138800 | -0.32995700 |
| C  | -4.81509100 | -2.42554900 | 0.80149000  |
| H  | -5.66580100 | -2.35689200 | 1.48357000  |
| H  | -4.69919700 | -3.47041300 | 0.47861800  |
| H  | -3.30249200 | -2.53415200 | 2.34182700  |
| H  | 2.52476000  | -4.01012000 | -4.46558100 |
| H  | 3.84452400  | -3.41304600 | -3.41147100 |
| H  | 2.84287600  | -4.78683900 | -2.91340400 |
| C  | -0.94382300 | 0.71671200  | 1.10581500  |
| C  | -2.01197000 | 1.35393400  | 0.46434900  |
| C  | -1.00606200 | 0.64326400  | 2.49883200  |
| C  | -3.11201300 | 1.84650400  | 1.15060800  |
| C  | -2.09543800 | 1.13539300  | 3.20955300  |
| C  | -3.15212200 | 1.73567400  | 2.53594700  |
| C  | 0.99299700  | 1.76233300  | -0.58308900 |
| C  | 1.40915000  | 2.73880500  | 0.32644200  |

---

|   |             |             |             |
|---|-------------|-------------|-------------|
| C | 0.95472100  | 2.12094600  | -1.93074800 |
| C | 1.78964100  | 4.00837400  | -0.07339900 |
| C | 1.32678400  | 3.39056000  | -2.35674900 |
| C | 1.74576300  | 4.33267800  | -1.42641400 |
| C | 1.74743500  | -0.54449700 | 1.05731800  |
| C | 1.45675600  | -1.70476500 | 1.78347500  |
| C | 3.09114900  | -0.16546600 | 1.00334000  |
| C | 2.42242800  | -2.42667000 | 2.46265700  |
| C | 4.08001800  | -0.87557100 | 1.67441200  |
| C | 3.74666900  | -2.00512800 | 2.40854900  |
| P | 0.41416300  | 0.14354100  | 0.01977400  |
| F | -1.96874800 | 1.55150800  | -0.85799100 |
| F | 0.54001400  | 1.26199500  | -2.86515100 |
| F | 0.19643400  | -2.14967300 | 1.82049600  |
| F | 2.19696500  | 4.91160600  | 0.81508300  |
| F | 2.10432000  | 5.54546900  | -1.82649500 |
| F | 1.27726400  | 3.70876900  | -3.64839200 |
| F | 1.47207000  | 2.43831900  | 1.62922200  |
| F | 3.49656300  | 0.88257800  | 0.28117000  |
| F | 5.34950500  | -0.47911700 | 1.60443700  |
| F | 4.68844800  | -2.68620800 | 3.04897000  |
| F | 2.09612100  | -3.51818400 | 3.15174200  |
| F | -0.00322500 | 0.13611100  | 3.21826000  |
| F | -2.11800000 | 1.05289100  | 4.53838100  |
| F | -4.18843400 | 2.21310900  | 3.21348400  |
| F | -4.10785900 | 2.43829800  | 0.49555300  |

Pre-TS<sub>EE</sub>(L11)

-----

M06-L electronic energy (Hartree): -4442.915398

M06-L thermal correction to free energy (Hartree): 0.331417

Three lowest frequencies (cm<sup>-1</sup>): 19.23, 21.94, 28.13

-----

|    |             |             |             |
|----|-------------|-------------|-------------|
| Pd | 1.24357000  | -0.67901400 | -0.56311100 |
| O  | 0.22556500  | -2.58584700 | -2.72908300 |
| O  | 0.42184700  | -2.67540000 | -0.49116100 |
| C  | 0.09938400  | -3.17321800 | -1.64241200 |
| C  | -0.43961400 | -4.58817600 | -1.57984300 |
| C  | 2.00994000  | 1.16505600  | -0.39200500 |
| C  | 1.63830200  | 2.31169800  | -1.04687600 |
| S  | 3.14821800  | 1.58892700  | 0.85432900  |
| C  | 2.24879400  | 3.50663900  | -0.55846500 |
| C  | 3.09905700  | 3.28071500  | 0.49141600  |
| H  | 3.71868000  | 3.99548000  | 1.01820200  |

---

|   |             |             |             |
|---|-------------|-------------|-------------|
| O | 0.75981800  | 2.32128900  | -2.10315400 |
| C | 0.22760000  | 3.62465600  | -2.32805500 |
| H | -0.49482400 | 3.86939500  | -1.53258100 |
| O | 1.98511000  | 4.74029000  | -1.08453000 |
| C | 1.32803900  | 4.65650400  | -2.35572500 |
| H | 0.93147900  | 5.65506000  | -2.55547900 |
| H | 2.06472500  | 4.40317600  | -3.13224500 |
| H | -0.30329400 | 3.58052800  | -3.28271100 |
| C | 4.88651700  | -1.03886300 | -0.13868200 |
| C | 3.76157000  | -1.88840300 | -0.29303400 |
| C | 5.12261300  | -0.27558600 | -1.25503000 |
| C | 3.05728700  | -1.66432800 | -1.49261400 |
| S | 3.97687800  | -0.54799100 | -2.49346200 |
| O | 5.61658800  | -0.99743600 | 1.00482200  |
| C | 4.87586800  | -1.57210400 | 2.09332500  |
| O | 3.42623900  | -2.83161600 | 0.59674700  |
| C | 4.34216800  | -2.92681200 | 1.71277900  |
| H | 5.88824200  | 0.48365100  | -1.36323300 |
| H | 5.57244700  | -1.64748000 | 2.92998600  |
| H | 4.05440400  | -0.89295000 | 2.36685600  |
| H | 3.76677600  | -3.37399600 | 2.52570200  |
| H | 2.48653000  | -2.42869600 | -2.01349200 |
| H | 0.38973600  | -5.28863700 | -1.42435300 |
| H | -1.12641100 | -4.71821900 | -0.73658200 |
| H | -0.94485100 | -4.85824600 | -2.51165600 |
| H | 5.15576600  | -3.60433200 | 1.42764600  |
| C | -1.43489900 | 1.65429400  | 0.31290500  |
| C | -0.69254000 | 2.47067300  | 1.17299200  |
| C | -2.54352100 | 2.24680600  | -0.29842600 |
| C | -0.96862900 | 3.81686500  | 1.36140000  |
| C | -2.85427800 | 3.58949700  | -0.10978700 |
| C | -2.06179000 | 4.37993300  | 0.71405800  |
| C | -1.22117900 | -0.67034300 | 1.83998600  |
| C | -2.51863900 | -0.58170900 | 2.35113000  |
| C | -0.22999100 | -1.14449200 | 2.70107500  |
| C | -2.83368300 | -0.95796600 | 3.64593200  |
| C | -0.52060400 | -1.52631900 | 4.00549500  |
| C | -1.82339800 | -1.43244000 | 4.47687700  |
| C | -2.00164800 | -0.93443000 | -0.96927800 |
| C | -2.05034600 | -0.49617800 | -2.29446100 |
| C | -2.64197000 | -2.14478600 | -0.69540600 |
| C | -2.72854800 | -1.17829400 | -3.29001600 |
| C | -3.31281100 | -2.85867500 | -1.68056000 |
| C | -3.36219700 | -2.37415500 | -2.98058600 |

---

|   |             |             |             |
|---|-------------|-------------|-------------|
| P | -0.84934800 | -0.07615000 | 0.15654500  |
| F | 0.29569000  | 1.93489400  | 1.89603700  |
| F | 1.04640300  | -1.23798000 | 2.31470400  |
| F | -1.40160100 | 0.62171200  | -2.63532600 |
| F | -4.08352900 | -0.87525600 | 4.09749200  |
| F | -2.10679200 | -1.79570900 | 5.72142600  |
| F | 0.44488800  | -1.97253500 | 4.80736500  |
| F | -3.50807600 | -0.14636200 | 1.56158100  |
| F | -2.60211200 | -2.70587100 | 0.51783900  |
| F | -3.88541800 | -4.02579500 | -1.38281500 |
| F | -3.99885100 | -3.05885300 | -3.92423600 |
| F | -2.74568500 | -0.71389500 | -4.53880400 |
| F | -3.38321400 | 1.54678200  | -1.06399800 |
| F | -3.92437700 | 4.11661100  | -0.70305200 |
| F | -2.36013200 | 5.66057400  | 0.89610500  |
| F | -0.21468000 | 4.55397100  | 2.17426200  |

TS<sub>EE</sub>(L11)

-----  
M06-L electronic energy (Hartree): -4442.892435

M06-L thermal correction to free energy (Hartree): 0.324933

Three lowest frequencies (cm<sup>-1</sup>): -967.72, 15.97, 18.46

-----

|    |             |             |             |
|----|-------------|-------------|-------------|
| Pd | 1.31100700  | -0.39160000 | -0.38258000 |
| O  | 2.67439500  | -3.08418600 | -1.61350900 |
| O  | 0.83974400  | -2.53587300 | -0.43717900 |
| C  | 1.53933400  | -3.35815500 | -1.08453000 |
| C  | 1.02272700  | -4.75273500 | -1.28019700 |
| C  | 1.69135200  | 1.55216000  | -0.21248800 |
| C  | 1.14665900  | 2.60558000  | -0.89752800 |
| S  | 2.74114800  | 2.17248100  | 1.02592400  |
| C  | 1.52117200  | 3.89354600  | -0.40317100 |
| C  | 2.38499200  | 3.83021800  | 0.65623800  |
| H  | 2.82353300  | 4.64768100  | 1.21442600  |
| O  | 0.31827000  | 2.45053500  | -1.98344800 |
| C  | -0.43217700 | 3.63333400  | -2.24726100 |
| H  | -1.22727000 | 3.74134100  | -1.49232400 |
| O  | 1.02967500  | 5.05447400  | -0.93323800 |
| C  | 0.45804900  | 4.85190200  | -2.23184800 |
| H  | -0.10860300 | 5.75914500  | -2.45574700 |
| H  | 1.26335900  | 4.74202900  | -2.97312000 |
| H  | -0.89682000 | 3.49109200  | -3.22682100 |
| C  | 5.54249400  | -0.18004200 | -0.07724300 |
| C  | 4.27884200  | -0.77911000 | 0.16590400  |

---

|   |             |             |             |
|---|-------------|-------------|-------------|
| C | 5.59813200  | 0.42650800  | -1.30830100 |
| C | 3.34628300  | -0.66871700 | -0.87030400 |
| S | 4.10649100  | 0.27809400  | -2.14247100 |
| O | 6.57115300  | -0.21686000 | 0.81384000  |
| C | 6.10913600  | -0.56207700 | 2.12732800  |
| O | 4.00250600  | -1.44650700 | 1.31179800  |
| C | 5.18570200  | -1.75137800 | 2.07463700  |
| H | 6.45275200  | 0.92864300  | -1.74718200 |
| H | 7.00285700  | -0.78531800 | 2.71379800  |
| H | 5.59567400  | 0.30362500  | 2.56998900  |
| H | 4.83513600  | -2.02789800 | 3.07079200  |
| H | 2.97919900  | -1.93300700 | -1.31339500 |
| H | 1.78450800  | -5.48689300 | -1.00234400 |
| H | 0.11412500  | -4.91986300 | -0.69749100 |
| H | 0.79920200  | -4.90961000 | -2.34158800 |
| H | 5.68900400  | -2.61318400 | 1.61677700  |
| C | -1.90506800 | 1.35369600  | 0.17945300  |
| C | -1.38764300 | 2.29282800  | 1.07805700  |
| C | -3.06713500 | 1.71844500  | -0.50309800 |
| C | -1.93390700 | 3.55732500  | 1.24100500  |
| C | -3.64585700 | 2.97341600  | -0.34277700 |
| C | -3.07608700 | 3.89753900  | 0.52530200  |
| C | -1.47485200 | -0.91705900 | 1.71066300  |
| C | -2.81945100 | -1.12320500 | 2.02777800  |
| C | -0.53893600 | -1.17942100 | 2.71086700  |
| C | -3.22596900 | -1.58430100 | 3.26872700  |
| C | -0.92034400 | -1.63954400 | 3.96576300  |
| C | -2.26585900 | -1.84210000 | 4.24274900  |
| C | -1.78793400 | -1.28345600 | -1.16699400 |
| C | -1.82150200 | -0.82149400 | -2.48554400 |
| C | -2.10288100 | -2.63086500 | -0.97646500 |
| C | -2.17914900 | -1.62545900 | -3.55574400 |
| C | -2.45125000 | -3.46139500 | -2.03443400 |
| C | -2.49356500 | -2.95992500 | -3.32774200 |
| P | -0.98671200 | -0.22806800 | 0.09137000  |
| F | -0.35916500 | 1.95463200  | 1.86447600  |
| F | 0.76760900  | -0.98379000 | 2.50499000  |
| F | -1.47800600 | 0.44495000  | -2.74552800 |
| F | -4.51527300 | -1.78494100 | 3.53561300  |
| F | -2.63854600 | -2.28228500 | 5.43844100  |
| F | -0.00529500 | -1.87889900 | 4.90376700  |
| F | -3.75704200 | -0.89415500 | 1.10037400  |
| F | -2.05250600 | -3.20159300 | 0.23118300  |
| F | -2.72206000 | -4.74789300 | -1.80899300 |

---

|   |             |             |             |
|---|-------------|-------------|-------------|
| F | -2.82631600 | -3.75094900 | -4.34201700 |
| F | -2.20718500 | -1.13369000 | -4.79416600 |
| F | -3.69916300 | 0.86609000  | -1.31305600 |
| F | -4.75889600 | 3.28646200  | -1.00511600 |
| F | -3.63004400 | 5.09443800  | 0.68080200  |
| F | -1.38836600 | 4.42479900  | 2.09125200  |

Post-TS<sub>EE</sub>(L11)

-----  
M06-L electronic energy (Hartree): -4442.900514

M06-L thermal correction to free energy (Hartree): 0.328323

Three lowest frequencies (cm<sup>-1</sup>): 6.59, 19.51, 21.54

-----

|    |             |             |             |
|----|-------------|-------------|-------------|
| Pd | -1.34609500 | 0.41608000  | -0.21213000 |
| O  | -3.37155100 | -1.47957900 | 1.56803700  |
| O  | -1.88644200 | -1.75823900 | -0.09978000 |
| C  | -2.67871400 | -2.22523600 | 0.72608200  |
| C  | -2.93928400 | -3.68465500 | 0.85009400  |
| C  | -0.76592400 | 2.29152100  | -0.48945500 |
| C  | -0.02684700 | 3.09745900  | 0.33563000  |
| S  | -1.03525700 | 3.11721200  | -1.99281900 |
| C  | 0.37315200  | 4.33735100  | -0.25438300 |
| C  | -0.09427300 | 4.49894400  | -1.53002300 |
| H  | 0.06424400  | 5.33345300  | -2.20135600 |
| O  | 0.30401300  | 2.76205100  | 1.62531800  |
| C  | 1.41235000  | 3.52430600  | 2.09885400  |
| H  | 2.33724900  | 3.16398700  | 1.62029300  |
| O  | 1.17105700  | 5.23635600  | 0.39661300  |
| C  | 1.21888200  | 4.99240400  | 1.80823000  |
| H  | 2.05512400  | 5.58505100  | 2.18730800  |
| H  | 0.28826500  | 5.35022100  | 2.27279500  |
| H  | 1.47813500  | 3.33660000  | 3.17389800  |
| C  | -5.61447900 | 1.26255100  | -0.28089200 |
| C  | -4.42033900 | 0.52732000  | -0.55783900 |
| C  | -5.37488900 | 2.42570400  | 0.39987300  |
| C  | -3.25844200 | 1.10208600  | -0.08125600 |
| S  | -3.68092900 | 2.61174000  | 0.67996900  |
| O  | -6.85802600 | 0.82939400  | -0.64267700 |
| C  | -6.80517300 | -0.24626700 | -1.58666100 |
| O  | -4.45351400 | -0.67287300 | -1.22542900 |
| C  | -5.76012000 | -1.25746900 | -1.19038500 |
| H  | -6.09965400 | 3.15414400  | 0.74212000  |
| H  | -7.80378900 | -0.68996000 | -1.59449300 |
| H  | -6.58479800 | 0.15417900  | -2.58702000 |

---

|   |             |             |             |
|---|-------------|-------------|-------------|
| H | -5.73594700 | -2.09764500 | -1.88855500 |
| H | -3.22698800 | -0.52608300 | 1.32401100  |
| H | -3.85473300 | -3.93004200 | 0.29883400  |
| H | -2.11669100 | -4.25805500 | 0.41920100  |
| H | -3.10141100 | -3.96812300 | 1.89324600  |
| H | -5.96287000 | -1.63891600 | -0.17731500 |
| C | 2.36753900  | 0.53486800  | 0.14655800  |
| C | 2.55514000  | 1.50299900  | -0.84558800 |
| C | 3.34506200  | 0.46424900  | 1.14097600  |
| C | 3.60513700  | 2.40913500  | -0.82305400 |
| C | 4.41805500  | 1.34887100  | 1.17586100  |
| C | 4.54613500  | 2.32731000  | 0.19677000  |
| C | 1.41818100  | -1.53523200 | -1.45462400 |
| C | 2.57958500  | -2.30726700 | -1.38221400 |
| C | 0.73483400  | -1.52460700 | -2.67034800 |
| C | 3.04210200  | -3.04966900 | -2.45591800 |
| C | 1.17859700  | -2.25792200 | -3.76432400 |
| C | 2.33430700  | -3.02025700 | -3.65415400 |
| C | 0.77916100  | -1.62626800 | 1.38830000  |
| C | 0.65393600  | -1.05195800 | 2.65672600  |
| C | 0.54632700  | -3.00141100 | 1.31023900  |
| C | 0.34633900  | -1.78695600 | 3.79062500  |
| C | 0.22652600  | -3.76016800 | 2.43033800  |
| C | 0.12634700  | -3.15437100 | 3.67543900  |
| P | 0.87144100  | -0.50256900 | -0.05320400 |
| F | 1.72865500  | 1.53498000  | -1.89709800 |
| F | -0.37426400 | -0.79450900 | -2.83136500 |
| F | 0.82417800  | 0.26665200  | 2.79726500  |
| F | 4.14541600  | -3.78849400 | -2.35343600 |
| F | 2.76556200  | -3.72458500 | -4.69337000 |
| F | 0.50872600  | -2.22882100 | -4.91505400 |
| F | 3.26287500  | -2.36140700 | -0.23280200 |
| F | 0.57303500  | -3.65398100 | 0.14217700  |
| F | -0.01300000 | -5.06570700 | 2.30298900  |
| F | -0.18266400 | -3.87484800 | 4.74717800  |
| F | 0.24805000  | -1.19152900 | 4.97794400  |
| F | 3.31350300  | -0.47819000 | 2.08602700  |
| F | 5.33635700  | 1.24955400  | 2.13622300  |
| F | 5.57191900  | 3.17005000  | 0.22835800  |
| F | 3.72632100  | 3.32814000  | -1.77890900 |

(DMAc)Pd(EDOT)(OAc)

-----

M06-L electronic energy (Hartree): -1424.721570

---

M06-L thermal correction to free energy (Hartree): 0.234382

Three lowest frequencies (cm-1): 20.89, 49.32, 54.87

-----

|    |             |             |             |
|----|-------------|-------------|-------------|
| Pd | -1.31028800 | -0.05180600 | 0.28860300  |
| O  | -0.20116100 | 1.43144300  | 1.30455300  |
| O  | -2.72387400 | -1.35887400 | -0.52363000 |
| O  | -3.42258100 | 0.65535800  | 0.03938200  |
| C  | 0.57672300  | 2.34175000  | 0.90797100  |
| C  | -3.66939100 | -0.48779500 | -0.44557900 |
| C  | -5.02260900 | -0.84607800 | -0.96289800 |
| C  | 1.66351700  | 2.77276200  | 1.84578600  |
| N  | 0.44135000  | 2.95920900  | -0.27246200 |
| C  | -0.63258400 | 2.58948100  | -1.17690000 |
| C  | 1.45084400  | 3.83987300  | -0.83525200 |
| H  | -1.57645900 | 2.49682000  | -0.63316600 |
| H  | -0.41662400 | 1.63674900  | -1.68111200 |
| H  | -0.73480500 | 3.37456800  | -1.92994000 |
| H  | 2.24755600  | 4.03721700  | -0.11991300 |
| H  | 0.99449200  | 4.79121500  | -1.12829300 |
| H  | 1.88954100  | 3.37297400  | -1.72592900 |
| H  | 2.64411000  | 2.45424600  | 1.47444400  |
| H  | 1.49663200  | 2.29658000  | 2.81268500  |
| H  | 1.69493600  | 3.85800800  | 1.98124500  |
| C  | 0.29083200  | -1.18645700 | 0.22310400  |
| C  | 1.58792000  | -0.92558100 | -0.14648700 |
| S  | 0.14094500  | -2.87091300 | 0.64028500  |
| C  | 2.44414000  | -2.07214100 | -0.10003100 |
| C  | 1.80764700  | -3.20933900 | 0.31473200  |
| H  | 2.22604300  | -4.19912900 | 0.44691300  |
| O  | 2.04302200  | 0.30348200  | -0.56869900 |
| C  | 3.47108500  | 0.37775600  | -0.52706600 |
| H  | 3.80810500  | 0.46335400  | 0.51784300  |
| O  | 3.76905200  | -2.01993000 | -0.43008500 |
| C  | 4.09201200  | -0.83710000 | -1.16821200 |
| H  | 5.18264100  | -0.76933700 | -1.16976400 |
| H  | 3.73900300  | -0.94201700 | -2.20466000 |
| H  | 3.74689700  | 1.28875600  | -1.06506900 |
| H  | -5.20756000 | -1.91944600 | -0.87151900 |
| H  | -5.79910800 | -0.28477100 | -0.43754700 |
| H  | -5.08318900 | -0.58721000 | -2.02647200 |

Pre-TS<sub>EE</sub>(DMAc)

-----  
M06-L electronic energy (Hartree): -2205.650475

---

M06-L thermal correction to free energy (Hartree): 0.335862

Three lowest frequencies (cm-1): 19.74, 31.07,38.21

-----

|    |             |             |             |
|----|-------------|-------------|-------------|
| Pd | 1.29418100  | 0.08419600  | -0.26407900 |
| O  | 1.61997200  | 2.13072400  | -1.02233900 |
| O  | 3.75838800  | -1.43874700 | -1.26398400 |
| O  | 3.32619700  | -0.01322800 | 0.42348500  |
| C  | 0.80540100  | 3.01637700  | -0.64649400 |
| C  | 4.10495800  | -0.77352000 | -0.27254600 |
| C  | 5.53563400  | -0.81993500 | 0.22753300  |
| C  | 0.06791500  | 3.82403200  | -1.67024400 |
| N  | 0.57078800  | 3.26338400  | 0.65114500  |
| C  | 1.30524200  | 2.55336000  | 1.68441400  |
| C  | -0.46257000 | 4.17861700  | 1.10665200  |
| H  | 2.26470700  | 2.21105000  | 1.29181800  |
| H  | 0.73084900  | 1.68228100  | 2.03097000  |
| H  | 1.47251600  | 3.23394700  | 2.52505100  |
| H  | -1.29574600 | 4.21514600  | 0.40095700  |
| H  | -0.06739600 | 5.19228000  | 1.24900800  |
| H  | -0.84586200 | 3.81865000  | 2.06544600  |
| H  | -0.95787400 | 3.44144900  | -1.76374200 |
| H  | 0.55731600  | 3.69927300  | -2.63751700 |
| H  | 0.00818500  | 4.88817200  | -1.42287100 |
| C  | -0.62396900 | 0.30541100  | -0.76456600 |
| C  | -1.70478800 | 0.62786200  | 0.02166600  |
| S  | -1.15344600 | 0.20472400  | -2.41912400 |
| C  | -2.93582600 | 0.77888400  | -0.69348000 |
| C  | -2.80407800 | 0.58315100  | -2.04270400 |
| H  | -3.56626600 | 0.65797800  | -2.80837300 |
| O  | -1.62580700 | 0.77696700  | 1.38716300  |
| C  | -2.81769700 | 1.32636100  | 1.95225000  |
| H  | -2.82879500 | 2.41839300  | 1.80987000  |
| O  | -4.11598900 | 1.06602800  | -0.06610800 |
| C  | -4.04903100 | 0.72545500  | 1.32414000  |
| H  | -4.96004100 | 1.12168200  | 1.77860200  |
| H  | -4.03833300 | -0.37025900 | 1.43284900  |
| H  | -2.77230300 | 1.11110300  | 3.02362700  |
| C  | -1.17327800 | -2.49596100 | 1.01333800  |
| C  | -0.17842400 | -2.49434800 | 0.01538300  |
| C  | -0.69619000 | -2.05207000 | 2.22620600  |
| C  | 1.05270800  | -1.90459000 | 0.41774900  |
| S  | 0.94475300  | -1.58944200 | 2.17409200  |
| O  | -2.45416900 | -2.87581300 | 0.77319600  |
| C  | -2.72059900 | -2.88165500 | -0.64109500 |

---

|   |             |             |             |
|---|-------------|-------------|-------------|
| O | -0.35437000 | -3.00213500 | -1.20154800 |
| C | -1.64688200 | -3.63351900 | -1.38158700 |
| H | -1.28704700 | -1.90101000 | 3.12322300  |
| H | -3.68960400 | -3.36896300 | -0.76427300 |
| H | -2.78591600 | -1.84349800 | -1.00108200 |
| H | -1.82542500 | -3.62957200 | -2.45835500 |
| H | 1.99280000  | -2.32630100 | 0.05614300  |
| H | 5.56796500  | -1.25466900 | 1.23340300  |
| H | 6.16947100  | -1.41558100 | -0.43437100 |
| H | 5.94873800  | 0.19129900  | 0.30969500  |
| H | -1.56562900 | -4.66793600 | -1.02859400 |

TS<sub>EE</sub>(DMAc)

-----  
M06-L electronic energy (Hartree): -2205.630379

M06-L thermal correction to free energy (Hartree): 0.329213

Three lowest frequencies (cm-1): -1093.31, 22.24, 26.65

-----

|    |             |             |             |
|----|-------------|-------------|-------------|
| Pd | -1.30488300 | 0.48087500  | -0.05559800 |
| O  | -2.97515900 | -0.92260100 | -0.39777600 |
| O  | -1.43542800 | 3.65134300  | -0.49813800 |
| O  | -2.80038600 | 2.04000800  | 0.28073400  |
| C  | -2.86618400 | -2.17043400 | -0.27462500 |
| C  | -2.57742800 | 3.21894500  | -0.09819700 |
| C  | -3.69621400 | 4.21913700  | -0.09265700 |
| C  | -3.37481000 | -3.05320600 | -1.37731600 |
| N  | -2.34508100 | -2.74125400 | 0.82502000  |
| C  | -1.98582400 | -1.94727400 | 1.98669700  |
| C  | -1.93123700 | -4.13040300 | 0.89102600  |
| H  | -2.56078700 | -1.01948400 | 1.99324000  |
| H  | -0.91522500 | -1.70369300 | 1.98995100  |
| H  | -2.22566400 | -2.52751500 | 2.88449700  |
| H  | -2.17748700 | -4.66279800 | -0.02645700 |
| H  | -2.41457700 | -4.63244200 | 1.73694800  |
| H  | -0.84301900 | -4.17570400 | 1.03542700  |
| H  | -2.53816400 | -3.46421600 | -1.95488800 |
| H  | -3.97925200 | -2.44556100 | -2.05256700 |
| H  | -3.97545000 | -3.89050000 | -1.00953100 |
| C  | 0.02864500  | -0.93248500 | -0.45178000 |
| C  | 1.11868900  | -1.37137200 | 0.25885900  |
| S  | 0.06282900  | -1.68597900 | -2.02190300 |
| C  | 1.96006700  | -2.29249900 | -0.43803100 |
| C  | 1.52126600  | -2.56898200 | -1.70535500 |
| H  | 1.93675400  | -3.26817900 | -2.42027000 |

---

|   |             |             |             |
|---|-------------|-------------|-------------|
| O | 1.39943400  | -0.95771900 | 1.53968000  |
| C | 2.32968100  | -1.82376700 | 2.18615500  |
| H | 1.82801500  | -2.76355400 | 2.46962900  |
| O | 3.08617500  | -2.83403200 | 0.11986900  |
| C | 3.50340200  | -2.11468700 | 1.28553200  |
| H | 4.24311000  | -2.74722100 | 1.78255000  |
| H | 3.98672200  | -1.17077000 | 0.98521300  |
| H | 2.64981100  | -1.30426500 | 3.09383600  |
| C | 2.63362500  | 1.90752200  | 0.35687800  |
| C | 1.48983400  | 1.67655700  | -0.44884500 |
| C | 2.30800700  | 2.22420400  | 1.65252900  |
| C | 0.25561400  | 1.78654900  | 0.20738700  |
| S | 0.61175300  | 2.19590800  | 1.89600000  |
| O | 3.90891900  | 1.80861900  | -0.11758600 |
| C | 3.94210700  | 1.06808600  | -1.34494400 |
| O | 1.57836500  | 1.39537800  | -1.76563800 |
| C | 2.89934100  | 1.58068400  | -2.30261100 |
| H | 2.99640400  | 2.48389100  | 2.44894300  |
| H | 4.94822400  | 1.19435100  | -1.74990900 |
| H | 3.76904900  | 0.00048200  | -1.13439100 |
| H | 2.91685100  | 1.02654600  | -3.24399100 |
| H | -0.59665500 | 2.76847700  | -0.26557200 |
| H | -3.44873800 | 5.04915600  | 0.57703700  |
| H | -3.81868000 | 4.64506700  | -1.09359700 |
| H | -4.63438500 | 3.76190400  | 0.22617000  |
| H | 3.05317400  | 2.64828400  | -2.50884200 |

Post-TS<sub>EE</sub>(DMAc)

-----  
M06-L electronic energy (Hartree): -2205.641517

M06-L thermal correction to free energy (Hartree): 0.33667

Three lowest frequencies (cm-1): 28.63, 31.52, 35.42

-----

|    |             |             |             |
|----|-------------|-------------|-------------|
| Pd | 0.11579800  | -1.21872100 | -0.05457500 |
| O  | 2.04235100  | -2.24309100 | -0.47106700 |
| O  | -2.53799900 | -2.96610300 | -0.76970300 |
| O  | -0.65436600 | -3.25407000 | 0.42926500  |
| C  | 3.16463500  | -1.68577600 | -0.37031900 |
| C  | -1.69481200 | -3.70262300 | -0.06469300 |
| C  | -2.11922800 | -5.12061500 | 0.08490400  |
| C  | 4.15223900  | -1.82871100 | -1.49222500 |
| N  | 3.52841600  | -0.99964200 | 0.72818400  |
| C  | 2.68195200  | -0.97013800 | 1.90823500  |
| C  | 4.67732100  | -0.11532200 | 0.78216500  |

---

|   |             |             |             |
|---|-------------|-------------|-------------|
| H | 2.04140300  | -1.85426100 | 1.92315400  |
| H | 2.04892700  | -0.07332500 | 1.92899000  |
| H | 3.32740800  | -0.97613100 | 2.79333000  |
| H | 5.25678500  | -0.15869000 | -0.13902900 |
| H | 5.32518300  | -0.38518700 | 1.62394300  |
| H | 4.33316900  | 0.91809400  | 0.92521800  |
| H | 4.23720500  | -0.88963500 | -2.05160200 |
| H | 3.78460500  | -2.59332000 | -2.17844600 |
| H | 5.15196100  | -2.10652300 | -1.14416200 |
| C | 0.88906900  | 0.54990500  | -0.47751400 |
| C | 0.97754400  | 1.70583200  | 0.25657500  |
| S | 1.64068200  | 0.81976800  | -2.02545900 |
| C | 1.65670100  | 2.77887600  | -0.40228300 |
| C | 2.08279300  | 2.45594000  | -1.66196500 |
| H | 2.64480200  | 3.06770700  | -2.35670300 |
| O | 0.47255500  | 1.84652400  | 1.53125100  |
| C | 1.09706900  | 2.93106500  | 2.21855900  |
| H | 2.13330100  | 2.65977200  | 2.47903400  |
| O | 1.87750400  | 3.99277400  | 0.18697700  |
| C | 1.08698300  | 4.17535700  | 1.36708500  |
| H | 1.52670500  | 5.02511200  | 1.89555500  |
| H | 0.05451200  | 4.42774000  | 1.08186600  |
| H | 0.52809900  | 3.07931600  | 3.13995800  |
| C | -3.41988000 | 1.22644700  | 0.36082900  |
| C | -2.29745000 | 0.71276500  | -0.36380600 |
| C | -3.60031100 | 0.62418800  | 1.57589200  |
| C | -1.61399900 | -0.29820400 | 0.27763500  |
| S | -2.38282900 | -0.57764400 | 1.82769900  |
| O | -4.23529800 | 2.20699000  | -0.12917600 |
| C | -3.63126300 | 2.90395000  | -1.22441900 |
| O | -1.95411100 | 1.20249600  | -1.59704600 |
| C | -3.02503200 | 1.93104200  | -2.20242500 |
| H | -4.39223100 | 0.79868200  | 2.29388800  |
| H | -4.42956300 | 3.48882900  | -1.68775500 |
| H | -2.86000700 | 3.59019800  | -0.84267700 |
| H | -2.58990600 | 2.45146600  | -3.05929200 |
| H | -2.22268200 | -2.02147200 | -0.72462200 |
| H | -3.02829800 | -5.16793000 | 0.69365700  |
| H | -2.36687900 | -5.54666200 | -0.89178500 |
| H | -1.33372300 | -5.70738900 | 0.56099000  |
| H | -3.79311500 | 1.23025100  | -2.56357400 |

Int<sub>PE</sub>(L1)

-----

---

M06-L electronic energy (Hartree): -1403.195001

M06-L thermal correction to free energy (Hartree): 0.460221

Three lowest frequencies (cm<sup>-1</sup>): 21.49, 41.32, 50.36

-----

|    |             |             |             |
|----|-------------|-------------|-------------|
| Pd | -0.91913900 | -0.65810100 | 0.01830000  |
| O  | -2.78090100 | -1.83196000 | 0.00159000  |
| O  | -0.87560800 | -2.95578300 | -0.01770100 |
| C  | -2.14373600 | -2.93809400 | -0.02103100 |
| C  | -2.90792100 | -4.22835600 | -0.06933200 |
| H  | -2.79787400 | -4.68216400 | -1.06086100 |
| H  | -2.50129100 | -4.94133300 | 0.65441400  |
| H  | -3.97169800 | -4.07286700 | 0.12542400  |
| C  | 2.02292000  | -0.68215200 | -1.52243900 |
| C  | 2.06057200  | -0.53887900 | 1.60642200  |
| C  | 1.65231800  | 2.04126900  | -0.07592700 |
| P  | 1.24289000  | 0.16450000  | 0.01767700  |
| C  | 1.72548400  | 0.36433300  | 2.79824100  |
| H  | 0.64488000  | 0.53592900  | 2.88953100  |
| H  | 2.05269000  | -0.14440100 | 3.71503400  |
| H  | 2.23266800  | 1.33318100  | 2.77107800  |
| C  | 1.42471700  | -1.89943400 | 1.92387400  |
| H  | 0.34948500  | -1.80202900 | 2.11760100  |
| H  | 1.54704600  | -2.64181500 | 1.13310900  |
| H  | 1.89766900  | -2.29614500 | 2.83338400  |
| C  | 3.57916500  | -0.71563300 | 1.52414100  |
| H  | 4.11599200  | 0.20949500  | 1.29805900  |
| H  | 3.93872000  | -1.06902600 | 2.50053400  |
| H  | 3.87464800  | -1.46866900 | 0.78731700  |
| C  | 3.11603100  | 2.34442100  | 0.26544100  |
| H  | 3.30514100  | 3.40327400  | 0.04223000  |
| H  | 3.33601100  | 2.20145900  | 1.32778100  |
| H  | 3.83357900  | 1.75744900  | -0.31370500 |
| C  | 0.76060000  | 2.86210100  | 0.87001900  |
| H  | 0.68816600  | 2.46521300  | 1.88438800  |
| H  | 1.19080300  | 3.87051800  | 0.94297600  |
| H  | -0.25341900 | 2.96365600  | 0.47750100  |
| C  | 1.36108200  | 2.57273500  | -1.48356600 |
| H  | 2.05392100  | 2.20187500  | -2.24363200 |
| H  | 0.33614500  | 2.34954400  | -1.79885800 |
| H  | 1.46324600  | 3.66630700  | -1.46097800 |
| C  | 1.07246800  | -0.46896200 | -2.71163400 |
| H  | 0.91840900  | 0.58031600  | -2.97459300 |
| H  | 1.49853200  | -0.96969000 | -3.59218800 |
| H  | 0.08825900  | -0.91538300 | -2.51563100 |

---

|   |             |             |             |
|---|-------------|-------------|-------------|
| C | 3.42624600  | -0.20166500 | -1.90168600 |
| H | 3.77757600  | -0.80766600 | -2.74829500 |
| H | 3.45524300  | 0.84225100  | -2.22643100 |
| H | 4.15271600  | -0.32855900 | -1.09226600 |
| C | 2.08697300  | -2.19864700 | -1.30279400 |
| H | 2.83747300  | -2.49417900 | -0.56322600 |
| H | 1.11908500  | -2.61782000 | -1.00824600 |
| H | 2.37660300  | -2.66463800 | -2.25473900 |
| C | -1.82158400 | 1.10293100  | 0.00628300  |
| C | -2.37899400 | 1.57936900  | 1.19871800  |
| C | -2.10714100 | 1.76181000  | -1.19363200 |
| C | -3.19793300 | 2.70976900  | 1.18939600  |
| H | -2.16464600 | 1.07881800  | 2.14371100  |
| C | -2.92528300 | 2.89496300  | -1.19662800 |
| H | -1.69211900 | 1.39795100  | -2.13454400 |
| C | -3.46615400 | 3.37599500  | -0.00591800 |
| H | -3.62064900 | 3.07387100  | 2.12550500  |
| H | -3.13616700 | 3.40192100  | -2.13798200 |
| H | -4.09669800 | 4.26319500  | -0.00914600 |

Pre-TS<sub>PE</sub>(L1)

-----  
M06-L electronic energy (Hartree): -2184.106980

M06-L thermal correction to free energy (Hartree): 0.559701

Three lowest frequencies (cm<sup>-1</sup>): 21.89, 28.21, 37.13  
-----

|    |             |             |             |
|----|-------------|-------------|-------------|
| Pd | 0.01631200  | 0.51524100  | -0.06483300 |
| O  | 0.06801800  | 3.04154900  | -1.91701100 |
| O  | -0.62053800 | 2.62966200  | 0.18675500  |
| C  | -0.43523600 | 3.39558200  | -0.83227700 |
| C  | -0.91034200 | 4.82263100  | -0.64310900 |
| C  | 3.89988200  | 0.41418900  | 0.95215800  |
| C  | 3.27113700  | 0.87950200  | -0.22894500 |
| C  | 3.28242900  | 0.87621200  | 2.09103300  |
| C  | 2.11942900  | 1.62319600  | 0.00653400  |
| S  | 1.92263900  | 1.85459600  | 1.73626000  |
| O  | 4.98731200  | -0.39756700 | 0.93802000  |
| C  | 5.16250800  | -1.00734100 | -0.35284500 |
| O  | 3.73513300  | 0.61598600  | -1.46470900 |
| C  | 5.04642300  | 0.01624700  | -1.45097400 |
| H  | 3.53051600  | 0.61678800  | 3.11326300  |
| H  | 6.15884700  | -1.45413400 | -0.34144800 |
| H  | 4.40901300  | -1.79699100 | -0.48072300 |
| H  | 5.17193300  | -0.44306800 | -2.43365600 |

---

|   |             |             |             |
|---|-------------|-------------|-------------|
| H | 1.70419300  | 2.33645500  | -0.70199100 |
| H | -2.00715500 | 4.84763600  | -0.68088400 |
| H | -0.61920800 | 5.20993400  | 0.33873000  |
| H | -0.52603000 | 5.48101900  | -1.42683100 |
| H | 5.79127800  | 0.81308100  | -1.32722300 |
| C | -3.29409600 | 0.50899700  | -1.09795500 |
| C | -2.71226200 | -0.27443600 | 1.87698600  |
| C | -2.38381500 | -2.36659800 | -0.39757400 |
| P | -2.13358900 | -0.50524900 | 0.06309800  |
| C | -2.05402800 | -1.34432800 | 2.75375900  |
| H | -0.96696200 | -1.38567100 | 2.60106400  |
| H | -2.22823500 | -1.08497600 | 3.80689200  |
| H | -2.46777500 | -2.34505500 | 2.59588800  |
| C | -2.19462000 | 1.07499900  | 2.39115600  |
| H | -1.09895900 | 1.12487400  | 2.35223800  |
| H | -2.57837100 | 1.93345000  | 1.83700100  |
| H | -2.50421500 | 1.18329400  | 3.44029300  |
| C | -4.22813500 | -0.33250200 | 2.08918900  |
| H | -4.67573100 | -1.27755000 | 1.77216600  |
| H | -4.42905300 | -0.22446200 | 3.16432800  |
| H | -4.75908900 | 0.48001900  | 1.58525200  |
| C | -3.74688100 | -2.91615100 | 0.04900200  |
| H | -3.88479100 | -3.89934400 | -0.42170200 |
| H | -3.78242100 | -3.07941600 | 1.13137600  |
| H | -4.60355100 | -2.30112900 | -0.23027300 |
| C | -1.32052200 | -3.29987200 | 0.21221500  |
| H | -1.07491100 | -3.09821000 | 1.25516200  |
| H | -1.71793700 | -4.32319800 | 0.16027600  |
| H | -0.39061400 | -3.28489800 | -0.35724900 |
| C | -2.24097400 | -2.53418800 | -1.91528400 |
| H | -3.05890800 | -2.09475900 | -2.49153200 |
| H | -1.29333000 | -2.11841400 | -2.27818800 |
| H | -2.23057400 | -3.60973700 | -2.13959500 |
| C | -2.52091700 | 0.74488400  | -2.40392900 |
| H | -2.24442000 | -0.17822900 | -2.92133400 |
| H | -3.15639100 | 1.32603200  | -3.08744900 |
| H | -1.60457700 | 1.32179500  | -2.22331200 |
| C | -4.65325300 | -0.12407800 | -1.41200200 |
| H | -5.21147100 | 0.58104500  | -2.04367300 |
| H | -4.59244600 | -1.06427600 | -1.96571300 |
| H | -5.25573800 | -0.29171700 | -0.51222100 |
| C | -3.58842500 | 1.89318800  | -0.50627700 |
| H | -4.29174200 | 1.85658600  | 0.33129300  |
| H | -2.68369200 | 2.40939800  | -0.18297600 |

---

|   |             |             |             |
|---|-------------|-------------|-------------|
| H | -4.06319500 | 2.49747000  | -1.29246000 |
| C | 0.98059800  | -1.21689600 | -0.22349100 |
| C | 1.49765600  | -1.85735800 | 0.90766900  |
| C | 1.27757500  | -1.73736400 | -1.48875400 |
| C | 2.24873400  | -3.02700700 | 0.78123600  |
| H | 1.30662200  | -1.44880300 | 1.90248400  |
| C | 2.02928200  | -2.90790900 | -1.61638600 |
| H | 0.91251600  | -1.23435900 | -2.38636800 |
| C | 2.50099600  | -3.56673000 | -0.48054000 |
| H | 2.63230600  | -3.52124900 | 1.67382400  |
| H | 2.24080600  | -3.30762000 | -2.60806300 |
| H | 3.07644100  | -4.48576800 | -0.57898200 |

TS<sub>PE</sub>(L1)

-----

M06-L electronic energy (Hartree): -2184.079771

M06-L thermal correction to free energy (Hartree): 0.557151

Three lowest frequencies (cm<sup>-1</sup>): -466.01, 18.16, 31.55

-----

|    |             |             |             |
|----|-------------|-------------|-------------|
| Pd | -0.02597700 | -0.43959000 | 0.11548400  |
| O  | -1.34077400 | -3.36604200 | -0.66452200 |
| O  | 0.59804000  | -2.62113100 | 0.18761500  |
| C  | -0.09493300 | -3.51285300 | -0.34778000 |
| C  | 0.52704900  | -4.83177900 | -0.69198600 |
| C  | -4.30658300 | -0.29423400 | 0.57258800  |
| C  | -3.18191900 | -0.55104300 | -0.26071700 |
| C  | -4.07408100 | -0.62688800 | 1.88269400  |
| C  | -2.05819600 | -1.06949200 | 0.37308400  |
| S  | -2.47738300 | -1.24346400 | 2.07228900  |
| O  | -5.47678000 | 0.22708100  | 0.10114400  |
| C  | -5.27173100 | 0.87441000  | -1.16087800 |
| O  | -3.20716400 | -0.32109500 | -1.60011400 |
| C  | -4.51849900 | -0.02874000 | -2.10271000 |
| H  | -4.77171800 | -0.55702300 | 2.70945800  |
| H  | -6.26585000 | 1.10692100  | -1.54942500 |
| H  | -4.71528600 | 1.81089700  | -1.00435000 |
| H  | -4.36819700 | 0.44950400  | -3.07401700 |
| H  | -1.65766800 | -2.33965600 | -0.25682000 |
| H  | 1.08480800  | -4.71828500 | -1.63031600 |
| H  | 1.24538500  | -5.12696700 | 0.07722400  |
| H  | -0.22352700 | -5.61237600 | -0.83094900 |
| H  | -5.06588000 | -0.97068300 | -2.24899400 |
| C  | 3.19908700  | -0.76880100 | -1.32832400 |
| C  | 3.08560200  | 0.03778100  | 1.69033700  |

---

|   |             |             |             |
|---|-------------|-------------|-------------|
| C | 2.65465800  | 2.17108300  | -0.51995400 |
| P | 2.29278600  | 0.34169300  | -0.02591800 |
| C | 2.64519100  | 1.14270200  | 2.65651700  |
| H | 1.55793300  | 1.29929400  | 2.63567800  |
| H | 2.91449600  | 0.83975900  | 3.67774900  |
| H | 3.14015000  | 2.10036000  | 2.46495000  |
| C | 2.50856000  | -1.26903800 | 2.25179600  |
| H | 1.41669800  | -1.20581200 | 2.35372400  |
| H | 2.72770400  | -2.14653500 | 1.64048700  |
| H | 2.93347000  | -1.43715300 | 3.25144200  |
| C | 4.61469000  | -0.03868100 | 1.71233600  |
| H | 5.09538600  | 0.89011700  | 1.39297700  |
| H | 4.93895400  | -0.23003900 | 2.74523000  |
| H | 5.01214300  | -0.85222800 | 1.09923000  |
| C | 4.10727700  | 2.60166700  | -0.27815000 |
| H | 4.26392600  | 3.57348000  | -0.76722800 |
| H | 4.31017400  | 2.75143400  | 0.78800700  |
| H | 4.85668000  | 1.91341700  | -0.67202000 |
| C | 1.76858800  | 3.17849400  | 0.23530800  |
| H | 1.73137000  | 3.03375300  | 1.31575000  |
| H | 2.18820000  | 4.17856000  | 0.05504000  |
| H | 0.74449400  | 3.18050000  | -0.13842400 |
| C | 2.29654400  | 2.36195000  | -1.99947600 |
| H | 2.95905100  | 1.83822200  | -2.69302900 |
| H | 1.26434900  | 2.05079200  | -2.20126000 |
| H | 2.36421800  | 3.43326200  | -2.23516600 |
| C | 2.21670100  | -0.95092100 | -2.49612000 |
| H | 1.91019600  | -0.01149000 | -2.96611700 |
| H | 2.69136500  | -1.56978000 | -3.27105500 |
| H | 1.30775900  | -1.46822200 | -2.16072100 |
| C | 4.53758100  | -0.23987200 | -1.85387800 |
| H | 4.93336000  | -0.97308100 | -2.57071400 |
| H | 4.47070800  | 0.71468600  | -2.38120400 |
| H | 5.28236500  | -0.13926500 | -1.05616200 |
| C | 3.48347400  | -2.17711600 | -0.78728400 |
| H | 4.27603300  | -2.19712400 | -0.03326200 |
| H | 2.59264000  | -2.65637000 | -0.38005600 |
| H | 3.83705600  | -2.78741900 | -1.63104800 |
| C | -0.87090700 | 1.36625500  | 0.06909200  |
| C | -1.21303400 | 2.01484800  | 1.26196500  |
| C | -1.22123600 | 1.97253500  | -1.14347300 |
| C | -1.85103100 | 3.25591900  | 1.24254700  |
| H | -0.97511300 | 1.55319900  | 2.22177500  |
| C | -1.85809200 | 3.21482200  | -1.16366400 |

---

|   |             |            |             |
|---|-------------|------------|-------------|
| H | -1.00033000 | 1.47379300 | -2.08783100 |
| C | -2.17031500 | 3.86558300 | 0.02958600  |
| H | -2.09948200 | 3.74852200 | 2.18307300  |
| H | -2.11340200 | 3.67325500 | -2.11971400 |
| H | -2.66658700 | 4.83489700 | 0.01425600  |

Post-TS<sub>PE</sub>(L1)

-----  
M06-L electronic energy (Hartree): -2184.084638

M06-L thermal correction to free energy (Hartree): 0.555731

Three lowest frequencies (cm<sup>-1</sup>): 11.78, 18.35, 21.82  
-----

|    |             |             |             |
|----|-------------|-------------|-------------|
| Pd | 0.12049100  | 0.20957900  | 0.20894700  |
| O  | 1.81145000  | 2.91648800  | -0.86750400 |
| O  | -0.05462700 | 2.53434400  | 0.32850700  |
| C  | 0.67156600  | 3.29669800  | -0.31536200 |
| C  | 0.31166300  | 4.71822800  | -0.58110400 |
| C  | 4.51264800  | 0.26573500  | 0.55567800  |
| C  | 3.28212500  | 0.10876900  | -0.15857900 |
| C  | 4.32771300  | 0.65138600  | 1.85534100  |
| C  | 2.14002800  | 0.38967700  | 0.56075800  |
| S  | 2.63448500  | 0.82486300  | 2.17607800  |
| O  | 5.73802000  | 0.07227200  | -0.01655600 |
| C  | 5.64564400  | -0.60084400 | -1.27714400 |
| O  | 3.26309600  | -0.25329600 | -1.48552300 |
| C  | 4.52844000  | -0.02756500 | -2.11119600 |
| H  | 5.08464700  | 0.85766300  | 2.60217500  |
| H  | 6.61517900  | -0.46512400 | -1.76313000 |
| H  | 5.47873700  | -1.67500000 | -1.10792400 |
| H  | 4.47714600  | -0.51351800 | -3.08874000 |
| H  | 1.97210400  | 1.97438500  | -0.57035300 |
| H  | -0.22376800 | 4.76664600  | -1.53781900 |
| H  | -0.35652200 | 5.09276600  | 0.19628800  |
| H  | 1.19837300  | 5.35008600  | -0.66412400 |
| H  | 4.68090700  | 1.05338400  | -2.25783400 |
| C  | -2.97412400 | 1.24156100  | -1.35582600 |
| C  | -3.14409300 | 0.39296700  | 1.64141300  |
| C  | -3.07939800 | -1.75244800 | -0.59661700 |
| P  | -2.36214100 | -0.04627300 | -0.05129500 |
| C  | -2.97810500 | -0.79563400 | 2.59430200  |
| H  | -1.94498600 | -1.16863200 | 2.61183400  |
| H  | -3.22518700 | -0.46341600 | 3.61206800  |
| H  | -3.64692900 | -1.62900300 | 2.35756000  |
| C  | -2.32974400 | 1.54054300  | 2.25414100  |

---

|   |             |             |             |
|---|-------------|-------------|-------------|
| H | -1.27128400 | 1.26427700  | 2.35933000  |
| H | -2.37138900 | 2.46631200  | 1.67671700  |
| H | -2.72524100 | 1.75311700  | 3.25755000  |
| C | -4.62347800 | 0.78597000  | 1.61637200  |
| H | -5.26933700 | -0.00189900 | 1.21942500  |
| H | -4.95055200 | 0.98418000  | 2.64716000  |
| H | -4.81419600 | 1.69775200  | 1.04325300  |
| C | -4.59453900 | -1.89174500 | -0.40226800 |
| H | -4.92226000 | -2.81427200 | -0.90219200 |
| H | -4.85688100 | -1.99892800 | 0.65612100  |
| H | -5.18446400 | -1.07132800 | -0.81528300 |
| C | -2.42962400 | -2.92478800 | 0.15963400  |
| H | -2.41182300 | -2.81435200 | 1.24456300  |
| H | -3.01795900 | -3.82566200 | -0.06639100 |
| H | -1.40912600 | -3.10965500 | -0.17541500 |
| C | -2.72398200 | -1.98999400 | -2.07016700 |
| H | -3.26079900 | -1.34445700 | -2.76979100 |
| H | -1.64697900 | -1.87486400 | -2.24470800 |
| H | -2.98444500 | -3.02690200 | -2.32468200 |
| C | -1.94109900 | 1.22899000  | -2.49371000 |
| H | -1.84334100 | 0.25772400  | -2.98760900 |
| H | -2.23808200 | 1.96107600  | -3.25815200 |
| H | -0.94610800 | 1.51305500  | -2.12397900 |
| C | -4.37673500 | 1.01724100  | -1.92839700 |
| H | -4.59267400 | 1.83311300  | -2.63280800 |
| H | -4.49117600 | 0.08245500  | -2.48235100 |
| H | -5.14968600 | 1.05223200  | -1.15201500 |
| C | -2.97193500 | 2.66760400  | -0.78968900 |
| H | -3.77463800 | 2.84184100  | -0.06738500 |
| H | -2.02291000 | 2.93605200  | -0.32627500 |
| H | -3.14379000 | 3.35973400  | -1.62658000 |
| C | 0.59178200  | -1.72365300 | 0.10835000  |
| C | 0.73194000  | -2.49114800 | 1.27141800  |
| C | 0.80106500  | -2.34281400 | -1.13038700 |
| C | 1.00768200  | -3.85719200 | 1.19469100  |
| H | 0.60572800  | -2.02617900 | 2.25034400  |
| C | 1.07871900  | -3.70922800 | -1.20625200 |
| H | 0.73248400  | -1.76042800 | -2.04961200 |
| C | 1.17343700  | -4.47484100 | -0.04468300 |
| H | 1.09416100  | -4.44092500 | 2.11130400  |
| H | 1.21992700  | -4.17588700 | -2.18132300 |
| H | 1.38578800  | -5.54107700 | -0.10428000 |

Int<sub>PE</sub>(L2)

---

-----  
M06-L electronic energy (Hartree): -1635.517323  
M06-L thermal correction to free energy (Hartree): 0.567785  
Three lowest frequencies (cm<sup>-1</sup>): 24.55, 44.40, 45.04  
-----

|    |             |             |             |
|----|-------------|-------------|-------------|
| Pd | -0.99636200 | -1.34447400 | 0.02961500  |
| O  | -2.37692600 | -3.07421000 | -0.00656000 |
| O  | -3.23668600 | -1.03525700 | 0.05800500  |
| C  | -3.38747900 | -2.29694100 | 0.03479100  |
| C  | -4.76524200 | -2.88790800 | 0.09170500  |
| H  | -5.51148500 | -2.18782400 | -0.29228800 |
| H  | -4.81313200 | -3.82773200 | -0.46511500 |
| H  | -5.02009500 | -3.11127300 | 1.13450000  |
| C  | -3.71202000 | 2.93601400  | 1.39275900  |
| H  | -4.34345000 | 2.04386900  | 1.25285700  |
| H  | -4.37487900 | 3.73492300  | 1.75035100  |
| C  | -3.08595400 | 3.32203700  | 0.05893000  |
| H  | -3.86247700 | 3.51244500  | -0.69340300 |
| H  | -2.53335500 | 4.26781500  | 0.18015700  |
| C  | -2.63608000 | 2.62596300  | 2.42570500  |
| H  | -2.05747300 | 3.53928200  | 2.64081900  |
| H  | -3.08709600 | 2.31187800  | 3.37602500  |
| C  | -1.69552900 | 1.54167100  | 1.91619200  |
| H  | -0.93428400 | 1.30516000  | 2.67307900  |
| H  | -2.26268400 | 0.61190600  | 1.75077900  |
| C  | -2.12501300 | 2.25347100  | -0.45654100 |
| H  | -1.67099700 | 2.60044200  | -1.39329000 |
| H  | -2.67634500 | 1.33001400  | -0.69146200 |
| C  | -1.04356100 | 1.94594900  | 0.58408100  |
| H  | -0.45175000 | 2.86451400  | 0.73769600  |
| P  | 0.13641900  | 0.61348500  | 0.07258200  |
| C  | 1.11724500  | 2.25014800  | -4.24194400 |
| H  | 0.23612300  | 2.91073200  | -4.28424500 |
| H  | 1.64637100  | 2.37796900  | -5.19523300 |
| C  | 0.65188500  | 0.80741300  | -4.07967200 |
| H  | -0.00749100 | 0.51811000  | -4.90818900 |
| H  | 1.52465300  | 0.13537200  | -4.12480200 |
| C  | 2.00669500  | 2.67674300  | -3.08066900 |
| H  | 2.93302800  | 2.08000000  | -3.09269400 |
| H  | 2.31094200  | 3.72591300  | -3.18925100 |
| C  | 1.31101000  | 2.47460200  | -1.73758400 |
| H  | 1.98722700  | 2.75326400  | -0.91779000 |
| H  | 0.44362700  | 3.14970000  | -1.66554700 |
| C  | -0.06355400 | 0.60541000  | -2.74862000 |

---

|   |             |             |             |
|---|-------------|-------------|-------------|
| H | -0.37502600 | -0.44204900 | -2.62014800 |
| H | -0.98883000 | 1.19892500  | -2.74151000 |
| C | 0.84381800  | 1.02335600  | -1.58461300 |
| H | 1.73426200  | 0.37249200  | -1.63862100 |
| C | 4.14996000  | 1.52921400  | 2.48383400  |
| H | 4.54300900  | 2.27589200  | 1.77525300  |
| H | 4.89601300  | 1.43746600  | 3.28405600  |
| C | 3.97131100  | 0.20218100  | 1.75907700  |
| H | 4.91850800  | -0.13142000 | 1.31466900  |
| H | 3.67406500  | -0.57631600 | 2.48035900  |
| C | 2.82398900  | 2.02243600  | 3.04716000  |
| H | 2.48490500  | 1.33351400  | 3.83744300  |
| H | 2.94553600  | 3.00386400  | 3.52381000  |
| C | 1.73988600  | 2.10554700  | 1.97451500  |
| H | 0.80689500  | 2.45492300  | 2.43253200  |
| H | 2.02080800  | 2.86462700  | 1.22725400  |
| C | 2.90251000  | 0.30687900  | 0.67716300  |
| H | 2.80889000  | -0.64640000 | 0.14463200  |
| H | 3.22179600  | 1.05538400  | -0.06678000 |
| C | 1.56013000  | 0.74448100  | 1.28414900  |
| H | 1.30162300  | 0.00847600  | 2.06478900  |
| C | 0.78404500  | -2.23082500 | -0.01804000 |
| C | 1.45904800  | -2.46987700 | -1.22211700 |
| C | 1.33146700  | -2.72442500 | 1.17344700  |
| C | 2.65519000  | -3.19139800 | -1.23238000 |
| H | 1.06267900  | -2.08396000 | -2.16289000 |
| C | 2.52635800  | -3.44604600 | 1.15893100  |
| H | 0.83230500  | -2.53687800 | 2.12527700  |
| C | 3.19528900  | -3.67596400 | -0.04232000 |
| H | 3.16879900  | -3.36580500 | -2.17757200 |
| H | 2.93938600  | -3.82053700 | 2.09530200  |
| H | 4.13225400  | -4.23019000 | -0.05102800 |

Pre-TS<sub>PE</sub>(L2)

-----

M06-L electronic energy (Hartree): -2416.431353

M06-L thermal correction to free energy (Hartree): 0.666253

Three lowest frequencies (cm<sup>-1</sup>): 14.65, 23.36, 31.06

-----

|    |             |             |             |
|----|-------------|-------------|-------------|
| Pd | 0.54310700  | -0.68779000 | -0.12720800 |
| O  | 0.37794700  | -3.18180100 | 1.66644100  |
| O  | -0.22692100 | -2.72412500 | -0.45378700 |
| C  | -0.12436900 | -3.49791400 | 0.56950100  |
| C  | -0.72005700 | -4.87902300 | 0.37334700  |

---

|   |             |             |             |
|---|-------------|-------------|-------------|
| C | 4.34320500  | -0.51774000 | -1.06786400 |
| C | 3.71074100  | -1.07313200 | 0.07351600  |
| C | 3.77068300  | -0.94035600 | -2.24346600 |
| C | 2.59330000  | -1.84431400 | -0.23005000 |
| S | 2.44091500  | -1.98608700 | -1.97364000 |
| O | 5.39099500  | 0.34079600  | -0.98139900 |
| C | 5.48425700  | 0.90428600  | 0.33868600  |
| O | 4.13552800  | -0.85841100 | 1.33156500  |
| C | 5.40373800  | -0.17317500 | 1.38710500  |
| H | 4.02813600  | -0.61540000 | -3.24430600 |
| H | 6.44814900  | 1.41570200  | 0.38005400  |
| H | 4.67582900  | 1.63654200  | 0.47402500  |
| H | 5.46760900  | 0.24800500  | 2.39262300  |
| H | 2.17389900  | -2.60343700 | 0.42619600  |
| H | -0.41873700 | -5.30820000 | -0.58788700 |
| H | -0.43915800 | -5.55826300 | 1.18275800  |
| H | -1.81523100 | -4.79802900 | 0.35399200  |
| H | 6.20342100  | -0.91317100 | 1.25405300  |
| C | -2.95866200 | -1.84574900 | 3.85769500  |
| H | -2.09317900 | -2.52791100 | 3.85629800  |
| H | -3.55822900 | -2.10329000 | 4.74072500  |
| C | -3.76266300 | -2.06449900 | 2.58183400  |
| H | -4.08454500 | -3.11168200 | 2.50340200  |
| H | -4.68205100 | -1.45768500 | 2.61968500  |
| C | -2.45833800 | -0.40914100 | 3.95073100  |
| H | -3.31814500 | 0.27315800  | 4.05338200  |
| H | -1.84278900 | -0.27043100 | 4.84922900  |
| C | -1.66101600 | -0.02601500 | 2.70934500  |
| H | -1.29704100 | 1.00934900  | 2.78797200  |
| H | -0.76407600 | -0.66377300 | 2.63240200  |
| C | -2.95701100 | -1.68000800 | 1.34447700  |
| H | -3.55389400 | -1.84905000 | 0.43860200  |
| H | -2.07477200 | -2.32680800 | 1.26886300  |
| C | -2.49000000 | -0.22653700 | 1.43314300  |
| H | -3.38693700 | 0.41474200  | 1.48455500  |
| P | -1.51230600 | 0.37264200  | -0.02268000 |
| C | -4.60104300 | -1.05513900 | -3.30014800 |
| H | -5.05638700 | -1.80067600 | -2.62797900 |
| H | -5.14002600 | -1.12592500 | -4.25406000 |
| C | -3.12617800 | -1.38603300 | -3.49131400 |
| H | -3.00567000 | -2.39159100 | -3.91565500 |
| H | -2.69268800 | -0.68543200 | -4.22371100 |
| C | -4.76940400 | 0.33242100  | -2.69534600 |
| H | -4.38448100 | 1.08622300  | -3.40131700 |

---

|   |             |             |             |
|---|-------------|-------------|-------------|
| H | -5.83098600 | 0.56546000  | -2.53981600 |
| C | -4.01443400 | 0.45908100  | -1.37529500 |
| H | -4.12188600 | 1.47763700  | -0.97891900 |
| H | -4.47052800 | -0.21226400 | -0.63089800 |
| C | -2.35272500 | -1.28151400 | -2.18123800 |
| H | -1.28444300 | -1.47549300 | -2.34000800 |
| H | -2.69205700 | -2.06450200 | -1.48757600 |
| C | -2.53315000 | 0.10377700  | -1.55286100 |
| H | -2.10218100 | 0.82281300  | -2.26950900 |
| C | -2.06180300 | 5.10683900  | -0.05175700 |
| H | -2.99672300 | 5.12603400  | -0.63483000 |
| H | -1.80243800 | 6.15399000  | 0.15261300  |
| C | -0.97247800 | 4.43589500  | -0.87922200 |
| H | -0.84101700 | 4.95295200  | -1.83919000 |
| H | -0.00744300 | 4.50454900  | -0.35114600 |
| C | -2.30273900 | 4.35530800  | 1.25133200  |
| H | -1.39954200 | 4.42058100  | 1.88040800  |
| H | -3.11466900 | 4.82270900  | 1.82391800  |
| C | -2.62191800 | 2.88052800  | 1.01031700  |
| H | -2.77304200 | 2.38246300  | 1.97599400  |
| H | -3.57402200 | 2.79743300  | 0.46391100  |
| C | -1.29662100 | 2.96585500  | -1.11853800 |
| H | -0.50622400 | 2.49214100  | -1.71714200 |
| H | -2.22686700 | 2.89564200  | -1.70660900 |
| C | -1.48363000 | 2.22927200  | 0.21339200  |
| H | -0.56441200 | 2.38961100  | 0.79644800  |
| C | 1.46831300  | 1.07238300  | 0.12602800  |
| C | 1.93527200  | 1.82001500  | -0.96168500 |
| C | 1.72406100  | 1.54886900  | 1.41999500  |
| C | 2.61245400  | 3.02642300  | -0.76477900 |
| H | 1.76658600  | 1.46312800  | -1.97988300 |
| C | 2.40100200  | 2.75431600  | 1.61906000  |
| H | 1.38264600  | 0.97945000  | 2.28701300  |
| C | 2.83749100  | 3.50384200  | 0.52613500  |
| H | 2.95758100  | 3.59743300  | -1.62683200 |
| H | 2.58478500  | 3.10841000  | 2.63339600  |
| H | 3.35681900  | 4.44837200  | 0.67975300  |

TS<sub>PE</sub>(L2)

-----

M06-L electronic energy (Hartree): -2416.403543

M06-L thermal correction to free energy (Hartree): 0.666359

Three lowest frequencies (cm<sup>-1</sup>): -529.45, 16.48, 24.51

-----

---

|    |             |             |             |
|----|-------------|-------------|-------------|
| Pd | 0.49628500  | -0.53821500 | -0.32848600 |
| O  | 1.57649000  | -3.50718200 | 0.44490300  |
| O  | -0.24696600 | -2.65333800 | -0.55495200 |
| C  | 0.36443300  | -3.59437400 | -0.00849200 |
| C  | -0.30943400 | -4.91652100 | 0.19504000  |
| C  | 4.76515300  | -0.45298500 | -0.68864900 |
| C  | 3.61363100  | -0.66751400 | 0.12104900  |
| C  | 4.58897700  | -0.88874600 | -1.97664700 |
| C  | 2.52170300  | -1.24626000 | -0.51305500 |
| S  | 3.00822200  | -1.54212000 | -2.17704600 |
| O  | 5.90120200  | 0.14074800  | -0.21761600 |
| C  | 5.61144600  | 0.92168000  | 0.94942600  |
| O  | 3.57450400  | -0.30839300 | 1.43174900  |
| C  | 4.84471800  | 0.10249500  | 1.95513700  |
| H  | 5.31541200  | -0.86829600 | -2.78111500 |
| H  | 6.57635400  | 1.23649000  | 1.35326200  |
| H  | 5.03262600  | 1.81240000  | 0.65819200  |
| H  | 4.62327800  | 0.68626000  | 2.85273100  |
| H  | 1.98624300  | -2.49839100 | 0.11070400  |
| H  | -1.22007500 | -4.98374500 | -0.40362900 |
| H  | 0.36423700  | -5.74407900 | -0.04345400 |
| H  | -0.58161300 | -5.01584700 | 1.25308100  |
| H  | 5.42211900  | -0.78791400 | 2.24152600  |
| C  | -2.00982600 | -1.58624100 | 4.32254900  |
| H  | -0.95266500 | -1.89681500 | 4.33260500  |
| H  | -2.43588300 | -1.90350400 | 5.28337500  |
| C  | -2.71756800 | -2.27983700 | 3.16482300  |
| H  | -2.61659100 | -3.37042000 | 3.24751100  |
| H  | -3.79698100 | -2.06149000 | 3.20759400  |
| C  | -2.08099700 | -0.07031000 | 4.18295300  |
| H  | -3.12920600 | 0.25560200  | 4.27970900  |
| H  | -1.52841800 | 0.41900400  | 4.99572700  |
| C  | -1.54412000 | 0.39814200  | 2.83333100  |
| H  | -1.61649300 | 1.49262000  | 2.76173900  |
| H  | -0.47229200 | 0.14727400  | 2.75203300  |
| C  | -2.15972800 | -1.80514800 | 1.82895100  |
| H  | -2.64190300 | -2.32869400 | 0.99068500  |
| H  | -1.09018300 | -2.06123900 | 1.76917300  |
| C  | -2.29048700 | -0.28590300 | 1.68432700  |
| H  | -3.35741700 | -0.01868700 | 1.76330900  |
| P  | -1.69347800 | 0.28925100  | 0.02123300  |
| C  | -5.02802800 | -1.86096800 | -2.60198400 |
| H  | -5.02704100 | -2.79417400 | -2.01586700 |
| H  | -5.76583500 | -1.99848500 | -3.40345500 |

---

|   |             |             |             |
|---|-------------|-------------|-------------|
| C | -3.63770000 | -1.63610900 | -3.18427100 |
| H | -3.33633800 | -2.49056000 | -3.80484400 |
| H | -3.66175200 | -0.75977100 | -3.85241000 |
| C | -5.43432000 | -0.70595500 | -1.69568000 |
| H | -5.53035600 | 0.21375000  | -2.29531500 |
| H | -6.42089200 | -0.89017000 | -1.25004600 |
| C | -4.40446600 | -0.47152500 | -0.59406600 |
| H | -4.72062900 | 0.36429000  | 0.04303700  |
| H | -4.36457300 | -1.35932600 | 0.05721400  |
| C | -2.60828700 | -1.39909500 | -2.08495500 |
| H | -1.61004000 | -1.22343900 | -2.51130500 |
| H | -2.51057200 | -2.30158100 | -1.46423500 |
| C | -3.01684000 | -0.21934300 | -1.19899200 |
| H | -3.10374200 | 0.66335800  | -1.85665500 |
| C | -2.71876600 | 4.87191300  | -0.57974800 |
| H | -3.48983900 | 4.72932100  | -1.35405700 |
| H | -2.63543300 | 5.95546500  | -0.42239100 |
| C | -1.39991800 | 4.29904600  | -1.08447100 |
| H | -1.11391900 | 4.76871900  | -2.03523100 |
| H | -0.59534200 | 4.52997700  | -0.36732000 |
| C | -3.17250500 | 4.18371100  | 0.70409500  |
| H | -2.46570800 | 4.42104100  | 1.51574900  |
| H | -4.15073900 | 4.56798300  | 1.02232000  |
| C | -3.23439100 | 2.66650500  | 0.53752800  |
| H | -3.55751500 | 2.19426600  | 1.47629700  |
| H | -3.99540100 | 2.41680100  | -0.21994400 |
| C | -1.48749200 | 2.78596400  | -1.24939500 |
| H | -0.53764000 | 2.38008900  | -1.61811100 |
| H | -2.25147800 | 2.55323900  | -2.00914500 |
| C | -1.87448100 | 2.13169800  | 0.08154600  |
| H | -1.12005400 | 2.44633200  | 0.82084700  |
| C | 1.34123600  | 1.28058900  | -0.18778300 |
| C | 1.99182100  | 1.80538800  | -1.31398800 |
| C | 1.40738700  | 2.01062000  | 1.00550200  |
| C | 2.67534400  | 3.01976300  | -1.25347600 |
| H | 1.98655900  | 1.24592300  | -2.25123500 |
| C | 2.09851100  | 3.22345800  | 1.07149100  |
| H | 0.93029300  | 1.62840800  | 1.90945300  |
| C | 2.73509000  | 3.73549500  | -0.05730600 |
| H | 3.17471200  | 3.40075100  | -2.14483200 |
| H | 2.13810900  | 3.76718900  | 2.01583000  |
| H | 3.27370700  | 4.68063200  | -0.00589800 |

Post-TS<sub>PE</sub>(L2)

---

-----  
M06-L electronic energy (Hartree): -2416.407805  
M06-L thermal correction to free energy (Hartree): 0.665333  
Three lowest frequencies (cm<sup>-1</sup>): 14.20, 22.48, 26.95  
-----

|    |             |             |             |
|----|-------------|-------------|-------------|
| Pd | 0.59955700  | -0.35671600 | -0.27941900 |
| O  | 1.84712700  | -3.20884200 | 0.80477700  |
| O  | 0.09615200  | -2.58618100 | -0.46325500 |
| C  | 0.69704600  | -3.43938800 | 0.19651200  |
| C  | 0.16505500  | -4.81558100 | 0.40678300  |
| C  | 4.96952200  | -0.45461000 | -0.71692900 |
| C  | 3.77263900  | -0.29625400 | 0.04870400  |
| C  | 4.75179700  | -1.05279400 | -1.92911600 |
| C  | 2.61945000  | -0.76828800 | -0.54421300 |
| S  | 3.07032900  | -1.41219900 | -2.10811000 |
| O  | 6.19832300  | -0.05203100 | -0.27293700 |
| C  | 6.08607900  | 0.87421900  | 0.81306000  |
| O  | 3.78579800  | 0.30001000  | 1.28444100  |
| C  | 5.10173900  | 0.37226000  | 1.83790400  |
| H  | 5.48694900  | -1.31612100 | -2.68011600 |
| H  | 7.08926600  | 0.96910800  | 1.23586500  |
| H  | 5.76437100  | 1.85424500  | 0.42782800  |
| H  | 5.03609500  | 1.05343500  | 2.69011700  |
| H  | 2.14761600  | -2.28722200 | 0.52435800  |
| H  | -0.71580500 | -4.98315500 | -0.21444800 |
| H  | 0.93015700  | -5.56656300 | 0.19085800  |
| H  | -0.11333800 | -4.93488600 | 1.46045900  |
| H  | 5.40730300  | -0.62159400 | 2.19919500  |
| C  | -2.07991600 | -1.65009800 | 4.34594200  |
| H  | -0.99442900 | -1.80573700 | 4.45434500  |
| H  | -2.53841000 | -2.00463600 | 5.27838400  |
| C  | -2.57906100 | -2.46498000 | 3.15820300  |
| H  | -2.32727900 | -3.52650400 | 3.28541600  |
| H  | -3.67861300 | -2.40894900 | 3.10668100  |
| C  | -2.35205300 | -0.16289200 | 4.15170000  |
| H  | -3.43986600 | 0.01328500  | 4.15995900  |
| H  | -1.93825400 | 0.41707100  | 4.98705100  |
| C  | -1.78412700 | 0.34853100  | 2.83054700  |
| H  | -2.00686300 | 1.41899300  | 2.71824600  |
| H  | -0.68433000 | 0.25396900  | 2.83850100  |
| C  | -1.98972700 | -1.93970400 | 1.85485200  |
| H  | -2.31748700 | -2.54822400 | 0.99932900  |
| H  | -0.89146500 | -2.02927100 | 1.89075400  |
| C  | -2.33708000 | -0.46138100 | 1.65394200  |

---

|   |             |             |             |
|---|-------------|-------------|-------------|
| H | -3.43488800 | -0.36212200 | 1.66096700  |
| P | -1.72954100 | 0.16608800  | 0.01304800  |
| C | -4.61171700 | -2.41897500 | -2.76548500 |
| H | -4.49740700 | -3.35435900 | -2.19419100 |
| H | -5.28896700 | -2.64543300 | -3.59960300 |
| C | -3.24693500 | -1.98257400 | -3.28472200 |
| H | -2.79890400 | -2.77159100 | -3.90340100 |
| H | -3.37161900 | -1.10561800 | -3.94076500 |
| C | -5.21892300 | -1.35438700 | -1.86036100 |
| H | -5.42884000 | -0.44843300 | -2.45207600 |
| H | -6.18306500 | -1.69177000 | -1.45733000 |
| C | -4.27845600 | -0.98784600 | -0.71544000 |
| H | -4.73979500 | -0.21628000 | -0.08595800 |
| H | -4.13394700 | -1.86879200 | -0.06940300 |
| C | -2.30980000 | -1.62062200 | -2.13799200 |
| H | -1.32869700 | -1.29977600 | -2.51797000 |
| H | -2.11474700 | -2.51193200 | -1.52385100 |
| C | -2.92088000 | -0.52551400 | -1.25951400 |
| H | -3.11343300 | 0.34185600  | -1.91545600 |
| C | -3.42470600 | 4.52961900  | -0.71800300 |
| H | -4.11683400 | 4.24637100  | -1.52748200 |
| H | -3.53289600 | 5.61406200  | -0.58350700 |
| C | -2.00116900 | 4.18035900  | -1.13621000 |
| H | -1.74131100 | 4.68014200  | -2.07907600 |
| H | -1.29237700 | 4.55365400  | -0.37912300 |
| C | -3.82366000 | 3.79334200  | 0.55575400  |
| H | -3.20592800 | 4.15269800  | 1.39488800  |
| H | -4.86613100 | 4.01532300  | 0.81996000  |
| C | -3.62946300 | 2.28564400  | 0.41344500  |
| H | -3.92411700 | 1.77827100  | 1.34332900  |
| H | -4.29957100 | 1.90957000  | -0.37715100 |
| C | -1.81748900 | 2.67192900  | -1.27402000 |
| H | -0.78644900 | 2.43505900  | -1.56535800 |
| H | -2.47050000 | 2.30396600  | -2.08258800 |
| C | -2.17880800 | 1.96780400  | 0.03821600  |
| H | -1.52561500 | 2.39677800  | 0.81501300  |
| C | 1.19480400  | 1.55255000  | -0.13520300 |
| C | 1.87012600  | 2.16471600  | -1.20198800 |
| C | 0.99316900  | 2.30312900  | 1.02972600  |
| C | 2.29973200  | 3.48969900  | -1.11614900 |
| H | 2.07499200  | 1.59636200  | -2.11049800 |
| C | 1.43370800  | 3.62579300  | 1.12206500  |
| H | 0.48561300  | 1.85740600  | 1.88648100  |
| C | 2.08497300  | 4.22773500  | 0.04768000  |

---

|   |            |            |             |
|---|------------|------------|-------------|
| H | 2.81598000 | 3.94276100 | -1.96271400 |
| H | 1.26232500 | 4.18540000 | 2.04185900  |
| H | 2.42535900 | 5.25968100 | 0.11718200  |

Int<sub>PE</sub>(L3)

-----  
M06-L electronic energy (Hartree): -1867.807841

M06-L thermal correction to free energy (Hartree): 0.667677

Three lowest frequencies (cm<sup>-1</sup>): 13.96, 17.57, 28.30  
-----

|   |             |             |             |
|---|-------------|-------------|-------------|
| P | -0.28127800 | -0.09185700 | 0.28832000  |
| C | -1.10821200 | 1.60198300  | 0.26610500  |
| C | -1.32511400 | 2.07492900  | -1.18348000 |
| C | -2.44338900 | 1.66635100  | 1.03164500  |
| C | -0.12837600 | 2.58179500  | 0.95453100  |
| H | -2.03922300 | 1.41250200  | -1.69358300 |
| H | -0.37738800 | 2.02096600  | -1.73981500 |
| C | -1.87834000 | 3.50390500  | -1.20051200 |
| H | -2.28369600 | 1.38284900  | 2.08215400  |
| H | -3.17272000 | 0.95959800  | 0.61040100  |
| C | -3.01080400 | 3.09233200  | 0.98858100  |
| H | 0.84462500  | 2.55462000  | 0.43793000  |
| H | 0.05555000  | 2.26355500  | 1.99358200  |
| C | -0.68983800 | 4.00722500  | 0.93741100  |
| H | -2.02267200 | 3.81178200  | -2.24583300 |
| C | -3.21909400 | 3.52968700  | -0.46284600 |
| C | -0.89042300 | 4.44910300  | -0.51407700 |
| H | -3.97198300 | 3.10011300  | 1.52192200  |
| C | -2.02974300 | 4.04467800  | 1.67487700  |
| H | 0.02913600  | 4.67377200  | 1.43456200  |
| H | -3.93696800 | 2.86074900  | -0.96187800 |
| H | -3.64951600 | 4.54170100  | -0.49169900 |
| H | 0.07207700  | 4.44221900  | -1.04813900 |
| H | -1.26954100 | 5.48136300  | -0.54600000 |
| H | -2.43260000 | 5.06840800  | 1.67423300  |
| H | -1.89263500 | 3.75343600  | 2.72720600  |
| C | -1.07405700 | -1.33528700 | -0.87620700 |
| C | -0.53030700 | -2.72308600 | -0.46479900 |
| C | -2.61398500 | -1.35157100 | -0.84548300 |
| C | -0.60751600 | -1.08055900 | -2.32725000 |
| H | -0.80143500 | -2.96007900 | 0.57272600  |
| H | 0.57111700  | -2.70605700 | -0.51006300 |
| C | -1.08008700 | -3.80943400 | -1.39494400 |
| H | -3.00810900 | -0.37710500 | -1.16970700 |

---

|    |             |             |             |
|----|-------------|-------------|-------------|
| H  | -2.98504700 | -1.52153300 | 0.17340600  |
| C  | -3.14488600 | -2.44835500 | -1.77805300 |
| H  | 0.49296800  | -1.07645400 | -2.35947300 |
| H  | -0.92995200 | -0.09054900 | -2.67416600 |
| C  | -1.15761200 | -2.16185000 | -3.26426100 |
| H  | -0.69266300 | -4.78348300 | -1.06404400 |
| C  | -2.60978400 | -3.80944900 | -1.32580000 |
| C  | -0.63063700 | -3.53042800 | -2.82992100 |
| H  | -4.24305000 | -2.44642400 | -1.73015200 |
| C  | -2.68721500 | -2.16250700 | -3.20986400 |
| H  | -0.82193300 | -1.94098700 | -4.28749700 |
| H  | -2.94310800 | -4.02506500 | -0.29888400 |
| H  | -3.01492800 | -4.60547300 | -1.96792400 |
| H  | 0.46778700  | -3.55143000 | -2.89327300 |
| H  | -1.00761900 | -4.31419600 | -3.50381200 |
| H  | -3.08898500 | -2.92413300 | -3.89465800 |
| H  | -3.07980100 | -1.19004100 | -3.54421400 |
| C  | -0.51587700 | -0.72016500 | 2.01176500  |
| C  | -1.84555700 | -1.29449200 | 2.50320200  |
| H  | -0.22254200 | 0.12930100  | 2.64907300  |
| H  | 0.27437200  | -1.46501300 | 2.17190500  |
| C  | -1.84431900 | -1.44077600 | 4.02050100  |
| H  | -2.69947900 | -0.67455700 | 2.20384800  |
| H  | -2.02159600 | -2.28060500 | 2.04963800  |
| C  | -3.11494900 | -2.08157000 | 4.54877100  |
| H  | -0.96809600 | -2.03241500 | 4.32645500  |
| H  | -1.70807200 | -0.44699200 | 4.47434100  |
| H  | -3.09998300 | -2.17074300 | 5.64072100  |
| H  | -3.99945400 | -1.49181600 | 4.27620500  |
| H  | -3.25324500 | -3.08870200 | 4.13547700  |
| Pd | 1.87060400  | 0.22149600  | -0.40609100 |
| O  | 3.77753100  | 0.69592700  | -1.42347000 |
| O  | 1.88130200  | 1.27122700  | -2.41295600 |
| C  | 3.15077200  | 1.22255000  | -2.40309100 |
| C  | 3.93765400  | 1.76503900  | -3.55954200 |
| H  | 3.31038600  | 2.36402900  | -4.22373300 |
| H  | 4.77871000  | 2.36769400  | -3.20334700 |
| H  | 4.36119600  | 0.93458200  | -4.13599500 |
| C  | 2.51892000  | -0.59802200 | 1.28171800  |
| C  | 2.71351000  | 0.19199700  | 2.42212100  |
| C  | 2.90290000  | -1.94456100 | 1.31697900  |
| C  | 3.28634400  | -0.35396200 | 3.57232400  |
| H  | 2.41026400  | 1.24015100  | 2.42134600  |
| C  | 3.47448600  | -2.48701000 | 2.47060900  |

---

|   |            |             |            |
|---|------------|-------------|------------|
| H | 2.75868100 | -2.58061700 | 0.44289100 |
| C | 3.66354900 | -1.69572800 | 3.60230300 |
| H | 3.43205700 | 0.27449300  | 4.45061800 |
| H | 3.76949100 | -3.53602700 | 2.48150600 |
| H | 4.10225800 | -2.12218000 | 4.50265700 |

Pre-TS<sub>PE</sub>(L3)

-----  
M06-L electronic energy (Hartree): -2648.726289

M06-L thermal correction to free energy (Hartree): 0.772117

Three lowest frequencies (cm<sup>-1</sup>): 13.10, 17.98, 33.39  
-----

|   |            |             |             |
|---|------------|-------------|-------------|
| P | 1.08559400 | 0.25333500  | 0.37113600  |
| C | 1.96170100 | -1.32795400 | 0.93260300  |
| C | 2.59358200 | -2.09224700 | -0.24747000 |
| C | 3.04506500 | -1.07823800 | 2.00022100  |
| C | 0.87056900 | -2.22346000 | 1.56506400  |
| H | 3.39726200 | -1.49322700 | -0.69904600 |
| H | 1.83604900 | -2.26820500 | -1.02120600 |
| C | 3.18353800 | -3.42255200 | 0.23520500  |
| H | 2.60829400 | -0.56750800 | 2.87072300  |
| H | 3.83659400 | -0.42547100 | 1.60260800  |
| C | 3.65255900 | -2.40894900 | 2.46637600  |
| H | 0.08163300 | -2.41752100 | 0.82307000  |
| H | 0.39338000 | -1.69546800 | 2.40780000  |
| C | 1.47087200 | -3.54711600 | 2.04853800  |
| H | 3.62031500 | -3.94402100 | -0.62885800 |
| C | 4.26925300 | -3.14711900 | 1.27700600  |
| C | 2.07970000 | -4.28372200 | 0.85290900  |
| H | 4.42831900 | -2.19320700 | 3.21510200  |
| C | 2.55593800 | -3.27349300 | 3.09169000  |
| H | 0.67035700 | -4.15576000 | 2.49333600  |
| H | 5.07480100 | -2.54319500 | 0.83163800  |
| H | 4.72382100 | -4.09065600 | 1.61470900  |
| H | 1.30144300 | -4.49384700 | 0.10262600  |
| H | 2.48975800 | -5.25313200 | 1.17388200  |
| H | 2.98219400 | -4.22141900 | 3.45287100  |
| H | 2.12227700 | -2.76246500 | 3.96471800  |
| C | 2.05888900 | 1.21964700  | -0.90979500 |
| C | 1.39568000 | 2.61253500  | -1.00548700 |
| C | 3.55716600 | 1.38629500  | -0.59017200 |
| C | 1.90759100 | 0.55528900  | -2.29314100 |
| H | 1.43826200 | 3.13653900  | -0.04015000 |
| H | 0.32897900 | 2.48458400  | -1.25166700 |

---

|    |             |             |             |
|----|-------------|-------------|-------------|
| C  | 2.08588800  | 3.46036000  | -2.07938900 |
| H  | 4.04831600  | 0.40397800  | -0.54161600 |
| H  | 3.69964600  | 1.85959700  | 0.38930500  |
| C  | 4.23098900  | 2.23775700  | -1.67483400 |
| H  | 0.83864500  | 0.45664400  | -2.52999000 |
| H  | 2.32323100  | -0.46059500 | -2.28468900 |
| C  | 2.60428200  | 1.39156200  | -3.37103500 |
| H  | 1.60472100  | 4.44840400  | -2.11053300 |
| C  | 3.56788400  | 3.61658000  | -1.72790500 |
| C  | 1.95191100  | 2.77334400  | -3.43990700 |
| H  | 5.29533600  | 2.34742700  | -1.42225600 |
| C  | 4.08872600  | 1.54253100  | -3.03082200 |
| H  | 2.49224500  | 0.87764600  | -4.33737100 |
| H  | 3.67608400  | 4.12560100  | -0.75756200 |
| H  | 4.06798500  | 4.24698100  | -2.47820300 |
| H  | 0.88988100  | 2.67669200  | -3.71218900 |
| H  | 2.43117600  | 3.38354600  | -4.22021400 |
| H  | 4.59917400  | 2.12721100  | -3.81083600 |
| H  | 4.57347300  | 0.55454700  | -3.00015500 |
| C  | 0.99690100  | 1.30955100  | 1.88891900  |
| C  | 2.18101700  | 2.09834000  | 2.44799100  |
| H  | 0.60477500  | 0.63095100  | 2.66361900  |
| H  | 0.17489700  | 2.01194200  | 1.70678500  |
| C  | 1.84881900  | 2.64333100  | 3.83271300  |
| H  | 3.09633700  | 1.49681900  | 2.50704600  |
| H  | 2.41909200  | 2.94076300  | 1.78206800  |
| C  | 2.94867000  | 3.52247200  | 4.39968700  |
| H  | 0.90346300  | 3.20615900  | 3.78113700  |
| H  | 1.65573900  | 1.79808500  | 4.51144300  |
| H  | 2.69506500  | 3.89665100  | 5.39786600  |
| H  | 3.89400700  | 2.97114100  | 4.48258600  |
| H  | 3.13286800  | 4.39219000  | 3.75625700  |
| Pd | -1.01116900 | -0.33538800 | -0.46869500 |
| O  | -0.94911200 | -0.84814200 | -3.61599200 |
| O  | -0.22652200 | -1.92009100 | -1.77003800 |
| C  | -0.33125600 | -1.76758200 | -3.04357900 |
| C  | 0.42100800  | -2.79601100 | -3.86623000 |
| C  | -4.80140500 | -0.84267900 | 0.28006600  |
| C  | -4.13311000 | -0.30028900 | -0.84835700 |
| C  | -4.31572500 | -2.07699300 | 0.63493700  |
| C  | -3.06849000 | -1.07991700 | -1.29301800 |
| S  | -3.02185000 | -2.57481500 | -0.37183800 |
| O  | -5.80045800 | -0.18595000 | 0.92382300  |
| C  | -5.75678500 | 1.21928400  | 0.62192300  |

---

|   |             |             |             |
|---|-------------|-------------|-------------|
| O | -4.47476300 | 0.86817900  | -1.41739800 |
| C | -5.67757000 | 1.44346600  | -0.86478000 |
| H | -4.61826200 | -2.67250100 | 1.48785300  |
| H | -6.67649000 | 1.64434900  | 1.02914300  |
| H | -4.89060500 | 1.66851100  | 1.12792600  |
| H | -5.62941900 | 2.50893800  | -1.10102500 |
| H | -2.64000700 | -1.04226000 | -2.29522700 |
| H | 0.46498000  | -3.76767900 | -3.36395500 |
| H | -0.01670700 | -2.91044500 | -4.86206800 |
| H | 1.45611600  | -2.45158200 | -3.99573100 |
| H | -6.53977800 | 0.99847600  | -1.37761200 |
| C | -1.87137900 | 0.95904700  | 0.79430400  |
| C | -2.25735300 | 0.53292600  | 2.07262100  |
| C | -2.10864000 | 2.29434100  | 0.44027500  |
| C | -2.82430100 | 1.42427600  | 2.98614500  |
| H | -2.09972900 | -0.50704700 | 2.36907300  |
| C | -2.67113800 | 3.18907300  | 1.35427100  |
| H | -1.84373500 | 2.64978100  | -0.55680900 |
| C | -3.01747400 | 2.76081700  | 2.63604300  |
| H | -3.10723100 | 1.07321600  | 3.97852200  |
| H | -2.83707500 | 4.22584400  | 1.06130600  |
| H | -3.44707100 | 3.45986300  | 3.35165200  |

TS<sub>PE</sub>(L3)

-----  
M06-L electronic energy (Hartree): -2648.697855

M06-L thermal correction to free energy (Hartree): 0.768706

Three lowest frequencies (cm<sup>-1</sup>): -537.48, 16.53, 20.26

-----

|   |            |             |             |
|---|------------|-------------|-------------|
| P | 1.23773400 | 0.26986800  | 0.29331400  |
| C | 2.67352300 | -0.95768300 | 0.37851500  |
| C | 3.00019600 | -1.57011900 | -0.99787100 |
| C | 3.96684300 | -0.36890700 | 0.97366000  |
| C | 2.19082000 | -2.09016800 | 1.31498400  |
| H | 3.37554100 | -0.79178600 | -1.67762400 |
| H | 2.09079100 | -1.98628800 | -1.44644200 |
| C | 4.06783100 | -2.66129100 | -0.85695000 |
| H | 3.76925000 | 0.04721100  | 1.97237400  |
| H | 4.33847000 | 0.45508100  | 0.34555400  |
| C | 5.04308700 | -1.45663000 | 1.09769500  |
| H | 1.26158500 | -2.52332000 | 0.91410100  |
| H | 1.94578300 | -1.67609400 | 2.30743900  |
| C | 3.26418800 | -3.17383300 | 1.45232100  |
| H | 4.27267800 | -3.08052900 | -1.85286200 |

---

|   |             |             |             |
|---|-------------|-------------|-------------|
| C | 5.34549200  | -2.04991300 | -0.27939300 |
| C | 3.55631500  | -3.76533500 | 0.07112700  |
| H | 5.95262200  | -1.00185900 | 1.51604900  |
| C | 4.54190500  | -2.56151400 | 2.03044100  |
| H | 2.89075700  | -3.96052000 | 2.12366900  |
| H | 5.72779300  | -1.26825300 | -0.95378700 |
| H | 6.13181000  | -2.81522600 | -0.19553600 |
| H | 2.64250800  | -4.21558700 | -0.34740200 |
| H | 4.30392700  | -4.56864100 | 0.15319700  |
| H | 5.31436600  | -3.33651400 | 2.14649200  |
| H | 4.34519500  | -2.15106700 | 3.03257100  |
| C | 1.32246000  | 1.39796200  | -1.20860800 |
| C | 0.30877100  | 2.53666600  | -0.95056200 |
| C | 2.70844800  | 2.00567600  | -1.49604200 |
| C | 0.83430600  | 0.64058000  | -2.46427200 |
| H | 0.57775400  | 3.10384300  | -0.04825700 |
| H | -0.68446000 | 2.09634700  | -0.76406300 |
| C | 0.24729500  | 3.48511200  | -2.15198100 |
| H | 3.43866300  | 1.21059700  | -1.70435200 |
| H | 3.08152200  | 2.55460000  | -0.62206900 |
| C | 2.62880900  | 2.95151600  | -2.70197200 |
| H | -0.16669800 | 0.22479900  | -2.26624700 |
| H | 1.48794000  | -0.21340400 | -2.68533200 |
| C | 0.77756300  | 1.58138000  | -3.67218700 |
| H | -0.46633600 | 4.29118300  | -1.92834800 |
| C | 1.63620600  | 4.07824800  | -2.40394100 |
| C | -0.21335800 | 2.71186300  | -3.38886000 |
| H | 3.62713800  | 3.37490300  | -2.88322200 |
| C | 2.16629300  | 2.16985200  | -3.93362200 |
| H | 0.44602800  | 1.00664000  | -4.54932300 |
| H | 1.96824200  | 4.65188600  | -1.52471300 |
| H | 1.59809700  | 4.78101500  | -3.24971900 |
| H | -1.22064500 | 2.29864000  | -3.22204700 |
| H | -0.28014000 | 3.38671100  | -4.25550100 |
| H | 2.13740200  | 2.83120200  | -4.81262200 |
| H | 2.88236000  | 1.36492400  | -4.16022400 |
| C | 1.45063200  | 1.34646400  | 1.78412700  |
| C | 2.48382300  | 2.46778400  | 1.88840000  |
| H | 1.59761000  | 0.63190700  | 2.61054800  |
| H | 0.45850800  | 1.77457900  | 1.97413800  |
| C | 2.57185300  | 2.98304500  | 3.32056300  |
| H | 3.48019200  | 2.14967800  | 1.55699600  |
| H | 2.20164300  | 3.30090900  | 1.22781300  |
| C | 3.51202500  | 4.16585400  | 3.46608600  |

---

|    |             |             |             |
|----|-------------|-------------|-------------|
| H  | 1.56290100  | 3.25708100  | 3.66724200  |
| H  | 2.89862900  | 2.16062000  | 3.97581900  |
| H  | 3.56802000  | 4.51525300  | 4.50318500  |
| H  | 4.52977600  | 3.90477400  | 3.14887800  |
| H  | 3.18425800  | 5.01169100  | 2.84836900  |
| Pd | -0.88222200 | -0.81055300 | 0.22131300  |
| O  | -2.16116400 | -2.72459400 | -2.14990400 |
| O  | -0.12754200 | -2.23070700 | -1.33555200 |
| C  | -0.87063000 | -2.76677900 | -2.18550700 |
| C  | -0.25619300 | -3.47896900 | -3.35274300 |
| C  | -5.13258000 | -0.54407200 | 0.26876300  |
| C  | -3.86941700 | -0.47666100 | -0.37985000 |
| C  | -5.19814600 | -1.57727100 | 1.16959900  |
| C  | -2.93218600 | -1.43314500 | -0.00399800 |
| S  | -3.70764900 | -2.43774000 | 1.20705300  |
| O  | -6.15369100 | 0.32530300  | 0.01192100  |
| C  | -5.67055800 | 1.51120000  | -0.63044800 |
| O  | -3.58569200 | 0.47667800  | -1.31408000 |
| C  | -4.75758000 | 1.16347900  | -1.77871100 |
| H  | -6.04982200 | -1.86539800 | 1.77501200  |
| H  | -6.55459100 | 2.04918300  | -0.98035400 |
| H  | -5.14031500 | 2.13403300  | 0.10611300  |
| H  | -4.39784700 | 2.06230400  | -2.28560100 |
| H  | -2.47772300 | -2.15687000 | -1.18253800 |
| H  | 0.67467300  | -3.96847700 | -3.05355300 |
| H  | -0.94218100 | -4.20444600 | -3.79497800 |
| H  | -0.00294500 | -2.73641200 | -4.11972400 |
| H  | -5.28316100 | 0.52858700  | -2.50583600 |
| C  | -1.54051700 | 0.30885000  | 1.74142400  |
| C  | -1.27089900 | -0.12266800 | 3.04862700  |
| C  | -2.25055800 | 1.50472000  | 1.57456100  |
| C  | -1.66934200 | 0.63390800  | 4.15228400  |
| H  | -0.72372900 | -1.05333000 | 3.21296200  |
| C  | -2.64869300 | 2.26285700  | 2.67853600  |
| H  | -2.49935700 | 1.85377600  | 0.57171300  |
| C  | -2.35394200 | 1.83533200  | 3.97217500  |
| H  | -1.43866200 | 0.28189600  | 5.15794500  |
| H  | -3.19604800 | 3.19304900  | 2.52178700  |
| H  | -2.66096900 | 2.42857500  | 4.83202900  |

Post-TS<sub>PE</sub>(L3)

-----

M06-L electronic energy (Hartree): -2648.702150

M06-L thermal correction to free energy (Hartree): 0.770617

---

Three lowest frequencies (cm<sup>-1</sup>): 15.67, 17.35, 21.96

-----

|   |             |             |             |
|---|-------------|-------------|-------------|
| P | 1.30823400  | 0.26103000  | 0.23352500  |
| C | 2.65355800  | -1.06049200 | 0.36197300  |
| C | 2.75951000  | -1.90439900 | -0.92322300 |
| C | 4.05206900  | -0.51718000 | 0.70931900  |
| C | 2.20263800  | -1.98683100 | 1.51609600  |
| H | 3.10512800  | -1.27942500 | -1.75902700 |
| H | 1.77218300  | -2.29540200 | -1.19455600 |
| C | 3.74666100  | -3.06032600 | -0.72690700 |
| H | 4.01080300  | 0.06183400  | 1.64361100  |
| H | 4.40678200  | 0.16382600  | -0.07939700 |
| C | 5.04699900  | -1.67261400 | 0.88840300  |
| H | 1.19927500  | -2.38324900 | 1.29577400  |
| H | 2.11531800  | -1.40563600 | 2.44934800  |
| C | 3.19602700  | -3.13634200 | 1.70861100  |
| H | 3.79315700  | -3.64317700 | -1.65851800 |
| C | 5.12948000  | -2.49402600 | -0.39960300 |
| C | 3.26858700  | -3.95607900 | 0.41795200  |
| H | 6.03448900  | -1.25098200 | 1.12547500  |
| C | 4.57950300  | -2.57017000 | 2.03649600  |
| H | 2.84805800  | -3.77247800 | 2.53522300  |
| H | 5.48502300  | -1.86407300 | -1.22950300 |
| H | 5.85812500  | -3.30998500 | -0.28017400 |
| H | 2.27782700  | -4.37430300 | 0.18002200  |
| H | 3.95543300  | -4.80611400 | 0.54676700  |
| H | 5.29710000  | -3.38992800 | 2.19104900  |
| H | 4.54076800  | -1.99579600 | 2.97458700  |
| C | 1.30815500  | 1.14246600  | -1.42774700 |
| C | 0.42358400  | 2.39902900  | -1.25239100 |
| C | 2.69018700  | 1.56363400  | -1.95982200 |
| C | 0.61088900  | 0.25354900  | -2.48230500 |
| H | 0.84455100  | 3.07076600  | -0.49119100 |
| H | -0.56975400 | 2.08986200  | -0.88715100 |
| C | 0.28860300  | 3.15180300  | -2.57995800 |
| H | 3.32732700  | 0.68043900  | -2.11110800 |
| H | 3.20714800  | 2.20306000  | -1.23280400 |
| C | 2.53720500  | 2.31432000  | -3.28934400 |
| H | -0.39048400 | -0.01901500 | -2.10965000 |
| H | 1.16196500  | -0.68490100 | -2.62914900 |
| C | 0.48037600  | 0.99515100  | -3.81619400 |
| H | -0.32795200 | 4.04739100  | -2.41628700 |
| C | 1.67783300  | 3.56321700  | -3.07537700 |
| C | -0.37786400 | 2.24561900  | -3.61675700 |

---

|    |             |             |             |
|----|-------------|-------------|-------------|
| H  | 3.53511500  | 2.60751200  | -3.64574100 |
| C  | 1.86884000  | 1.39931800  | -4.31825100 |
| H  | 0.00067800  | 0.32568000  | -4.54541900 |
| H  | 2.15812400  | 4.23152700  | -2.34394000 |
| H  | 1.59059300  | 4.12716700  | -4.01617700 |
| H  | -1.38636300 | 1.96139200  | -3.27725900 |
| H  | -0.49693000 | 2.78254100  | -4.56988200 |
| H  | 1.78476100  | 1.91587800  | -5.28619000 |
| H  | 2.48712400  | 0.50367000  | -4.48452200 |
| C  | 1.77506100  | 1.52579000  | 1.50304600  |
| C  | 2.89449700  | 2.54958100  | 1.31805600  |
| H  | 1.96526100  | 0.93391800  | 2.41346000  |
| H  | 0.84648200  | 2.06701700  | 1.72527500  |
| C  | 3.18889800  | 3.26760000  | 2.63028400  |
| H  | 3.81815700  | 2.09288400  | 0.94093200  |
| H  | 2.60160500  | 3.29480900  | 0.56382300  |
| C  | 4.22727400  | 4.36505900  | 2.48327300  |
| H  | 2.25148400  | 3.68547500  | 3.03032100  |
| H  | 3.52622100  | 2.52829500  | 3.37342000  |
| H  | 4.43114700  | 4.86273800  | 3.43804300  |
| H  | 5.17786500  | 3.96388500  | 2.10898000  |
| H  | 3.89495200  | 5.13313500  | 1.77326000  |
| Pd | -0.93879000 | -0.58956300 | 0.55688300  |
| O  | -2.44271800 | -2.41783700 | -1.87968900 |
| O  | -0.46035800 | -2.36338500 | -0.82234700 |
| C  | -1.17694400 | -2.77174400 | -1.73988600 |
| C  | -0.67362000 | -3.67473900 | -2.81307700 |
| C  | -5.30267700 | -0.62541400 | 0.32402800  |
| C  | -3.95985300 | -0.28147200 | -0.02531100 |
| C  | -5.36375700 | -1.59062400 | 1.29301100  |
| C  | -2.96923000 | -0.97740700 | 0.63639200  |
| S  | -3.76010300 | -2.05947800 | 1.74999200  |
| O  | -6.39696600 | -0.06094100 | -0.26880700 |
| C  | -6.05847400 | 1.11662400  | -1.01049000 |
| O  | -3.68363800 | 0.66630400  | -0.98795800 |
| C  | -4.81359300 | 0.89763000  | -1.83308500 |
| H  | -6.24741200 | -2.04874500 | 1.72047100  |
| H  | -6.92172600 | 1.33163700  | -1.64540600 |
| H  | -5.90853300 | 1.95657300  | -0.31567500 |
| H  | -4.57450100 | 1.78199400  | -2.42918900 |
| H  | -2.68361000 | -1.85189300 | -1.08798000 |
| H  | 0.24358800  | -4.17237400 | -2.49248300 |
| H  | -1.42795500 | -4.41061400 | -3.10158300 |
| H  | -0.44700000 | -3.07210800 | -3.70138600 |

---

|   |             |             |             |
|---|-------------|-------------|-------------|
| H | -4.95089200 | 0.03847200  | -2.50860000 |
| C | -1.31710200 | 0.79843400  | 1.93818200  |
| C | -0.89184000 | 0.54985700  | 3.25165500  |
| C | -1.93995000 | 2.02202500  | 1.66170300  |
| C | -1.04083100 | 1.51617700  | 4.24815100  |
| H | -0.41233600 | -0.39922300 | 3.49934500  |
| C | -2.08083500 | 2.99133100  | 2.65805800  |
| H | -2.31936800 | 2.22401100  | 0.65992300  |
| C | -1.62565900 | 2.74704300  | 3.95298400  |
| H | -0.69136200 | 1.30512900  | 5.25895400  |
| H | -2.55584000 | 3.94283800  | 2.41789500  |
| H | -1.73489700 | 3.50465900  | 4.72732000  |

Int<sub>PE</sub>(L4)

-----  
M06-L electronic energy (Hartree): -1624.622600

M06-L thermal correction to free energy (Hartree): 0.352458

Three lowest frequencies (cm-1): 19.58, 21.72, 27.32  
-----

|    |             |             |             |
|----|-------------|-------------|-------------|
| Pd | 0.42953000  | 1.54374600  | 0.00989000  |
| O  | 0.94700400  | 3.68841500  | 0.03919700  |
| O  | 2.58189900  | 2.19751500  | 0.07359100  |
| C  | 2.19235600  | 3.40685400  | 0.06809800  |
| C  | 3.19223700  | 4.52383900  | 0.06515600  |
| H  | 2.86504100  | 5.33870800  | 0.71739700  |
| H  | 4.17981100  | 4.17403400  | 0.37478500  |
| H  | 3.27520400  | 4.93516700  | -0.94757000 |
| C  | -0.85762800 | -1.45156300 | -1.24106300 |
| C  | -2.24716600 | -1.42707200 | -1.04930400 |
| C  | -0.34128300 | -1.99506000 | -2.42310600 |
| C  | -3.09861700 | -1.94309700 | -2.01973300 |
| H  | -2.66328200 | -0.99861800 | -0.13763600 |
| C  | -1.19913200 | -2.50621200 | -3.39461800 |
| H  | 0.73495100  | -2.02624800 | -2.58612000 |
| C  | -2.57713500 | -2.48169200 | -3.19556900 |
| H  | -4.17453600 | -1.91914400 | -1.85713100 |
| H  | -0.78506600 | -2.92917500 | -4.30760300 |
| H  | -3.24537200 | -2.88253200 | -3.95504000 |
| C  | -0.31992700 | -1.36445900 | 1.60528200  |
| C  | -0.97035900 | -2.59964500 | 1.71859400  |
| C  | -0.02924500 | -0.63292200 | 2.76431500  |
| C  | -1.32515600 | -3.09011800 | 2.97271300  |
| H  | -1.19966700 | -3.17934500 | 0.82532300  |
| C  | -0.38181400 | -1.12758000 | 4.01601800  |

---

|   |             |             |             |
|---|-------------|-------------|-------------|
| H | 0.46888000  | 0.33433100  | 2.67283400  |
| C | -1.03243200 | -2.35596100 | 4.12047500  |
| H | -1.83175700 | -4.04966200 | 3.05190800  |
| H | -0.15534300 | -0.54993000 | 4.90963100  |
| H | -1.31458300 | -2.74069200 | 5.09836900  |
| C | 1.86906800  | -1.45174600 | -0.29236100 |
| C | 2.73685200  | -0.83191300 | -1.20169200 |
| C | 2.25966800  | -2.64510500 | 0.32724500  |
| C | 3.97067900  | -1.40465000 | -1.49618800 |
| H | 2.44264800  | 0.10727300  | -1.67079300 |
| C | 3.49858200  | -3.20943000 | 0.03594900  |
| H | 1.59648900  | -3.13444900 | 1.03926900  |
| C | 4.35326500  | -2.59257700 | -0.87583500 |
| H | 4.63680000  | -0.91784700 | -2.20540000 |
| H | 3.79610700  | -4.13532500 | 0.52386200  |
| H | 5.32111900  | -3.03643600 | -1.09992300 |
| P | 0.23653100  | -0.69560000 | 0.00702900  |
| C | -1.56267800 | 1.60514100  | -0.04663900 |
| C | -2.18067900 | 1.88758600  | -1.27058200 |
| C | -2.34730300 | 1.48756100  | 1.10508700  |
| C | -3.56374300 | 2.06215500  | -1.33678600 |
| H | -1.58600800 | 1.96179100  | -2.18185300 |
| C | -3.73217300 | 1.66159300  | 1.03288400  |
| H | -1.88736100 | 1.24922100  | 2.06472000  |
| C | -4.34346400 | 1.94467500  | -0.18692400 |
| H | -4.03241600 | 2.28252100  | -2.29550300 |
| H | -4.33268400 | 1.56745900  | 1.93717300  |
| H | -5.42317600 | 2.07153700  | -0.24187900 |

Pre-TS<sub>PE</sub>(L4)

-----

M06-L electronic energy (Hartree): -2405.542761

M06-L thermal correction to free energy (Hartree): 0.455462

Three lowest frequencies (cm<sup>-1</sup>): 12.85, 19.20, 28.53

-----

|    |             |             |             |
|----|-------------|-------------|-------------|
| Pd | 0.40228000  | -0.68399000 | 0.06960100  |
| O  | -0.03028800 | -3.48740300 | -1.11431600 |
| O  | -0.62681300 | -2.46963500 | 0.80359600  |
| C  | -0.66400100 | -3.44054400 | -0.04370500 |
| C  | -1.60258800 | -4.56808000 | 0.33861300  |
| C  | 4.22276600  | -0.59082700 | -0.35524300 |
| C  | 3.39218300  | -1.19478300 | 0.62075300  |
| C  | 3.87729400  | -0.96336000 | -1.63221500 |
| C  | 2.34540200  | -1.94381100 | 0.07888200  |

---

|   |             |             |             |
|---|-------------|-------------|-------------|
| S | 2.52346700  | -2.01132800 | -1.66674300 |
| O | 5.24299500  | 0.25088200  | -0.04444800 |
| C | 5.17704100  | 0.68470900  | 1.32330600  |
| O | 3.59213400  | -1.05086100 | 1.94480200  |
| C | 4.87888500  | -0.46862700 | 2.24468300  |
| H | 4.30929000  | -0.58290900 | -2.55050200 |
| H | 6.15328900  | 1.11921400  | 1.54872000  |
| H | 4.40456600  | 1.46027400  | 1.41516300  |
| H | 4.81995700  | -0.14094500 | 3.28406000  |
| H | 1.87079100  | -2.77964000 | 0.58297500  |
| H | -1.44586100 | -5.45199900 | -0.28570400 |
| H | -1.49221100 | -4.83959400 | 1.39369500  |
| H | -2.63809000 | -4.22871100 | 0.20388800  |
| H | 5.64260400  | -1.25187900 | 2.15546300  |
| C | -1.78293800 | 1.95352100  | -0.82515500 |
| C | -1.32174400 | 3.15372900  | -0.26619000 |
| C | -2.25992100 | 1.95275700  | -2.14054400 |
| C | -1.34507200 | 4.32933100  | -1.00843000 |
| H | -0.93655500 | 3.16584800  | 0.75284400  |
| C | -2.27647600 | 3.13148200  | -2.88274400 |
| H | -2.62203300 | 1.02872700  | -2.58957400 |
| C | -1.81857400 | 4.32036800  | -2.32010600 |
| H | -0.98542200 | 5.25464700  | -0.56222800 |
| H | -2.65310200 | 3.11861200  | -3.90360300 |
| H | -1.83222900 | 5.24015700  | -2.90138800 |
| C | -2.10933700 | 0.81721600  | 1.80708600  |
| C | -3.13347200 | 1.73858100  | 2.06812800  |
| C | -1.47047700 | 0.17935600  | 2.87807300  |
| C | -3.51361000 | 2.00973900  | 3.37914900  |
| H | -3.62882500 | 2.24970200  | 1.24286600  |
| C | -1.85439200 | 0.45292700  | 4.18830900  |
| H | -0.66890300 | -0.53180900 | 2.67261000  |
| C | -2.87535100 | 1.36728300  | 4.43932600  |
| H | -4.30861200 | 2.72678800  | 3.57301500  |
| H | -1.35082300 | -0.04501200 | 5.01431500  |
| H | -3.17197200 | 1.58437200  | 5.46352600  |
| C | -2.89046300 | -0.70286000 | -0.56274900 |
| C | -2.56443500 | -1.48351500 | -1.68001100 |
| C | -4.17365200 | -0.79300400 | -0.01369700 |
| C | -3.51235700 | -2.32831800 | -2.24874100 |
| H | -1.55109800 | -1.44622700 | -2.08316300 |
| C | -5.11778800 | -1.64664400 | -0.58077400 |
| H | -4.43763700 | -0.20286800 | 0.86275900  |
| C | -4.79093300 | -2.41136400 | -1.69866500 |

---

|   |             |             |             |
|---|-------------|-------------|-------------|
| H | -3.24622700 | -2.93395300 | -3.11295200 |
| H | -6.11211300 | -1.71465400 | -0.14390600 |
| H | -5.53017200 | -3.07924900 | -2.13644600 |
| P | -1.60088500 | 0.39963300  | 0.10982200  |
| C | 1.31535100  | 1.03383400  | -0.42235800 |
| C | 1.51262800  | 1.39763900  | -1.75972600 |
| C | 1.81647500  | 1.87185300  | 0.58066800  |
| C | 2.22753600  | 2.55138000  | -2.08675400 |
| H | 1.11102200  | 0.77221300  | -2.55950900 |
| C | 2.52797500  | 3.02952300  | 0.25389000  |
| H | 1.66546000  | 1.61716600  | 1.63283100  |
| C | 2.74203000  | 3.36892700  | -1.08098700 |
| H | 2.37795100  | 2.81391900  | -3.13407300 |
| H | 2.92011000  | 3.66384400  | 1.04958400  |
| H | 3.29767700  | 4.26986700  | -1.33587500 |

TS<sub>PE</sub>(L4)

-----

M06-L electronic energy (Hartree): -2405.513525

M06-L thermal correction to free energy (Hartree): 0.448656

Three lowest frequencies (cm-1): -562.02, 10.54,16.58

-----

|    |             |             |             |
|----|-------------|-------------|-------------|
| Pd | 0.43850500  | -0.47267500 | -0.37302400 |
| O  | 1.89037100  | -3.42035600 | -0.65514600 |
| O  | -0.18937400 | -2.62687200 | -0.33159300 |
| C  | 0.62437100  | -3.57031600 | -0.45785300 |
| C  | 0.14784300  | -4.98961000 | -0.36682800 |
| C  | 4.67330600  | 0.01077200  | -0.24687500 |
| C  | 3.46525800  | -0.57473400 | 0.22173400  |
| C  | 4.68262600  | 0.15899300  | -1.61104400 |
| C  | 2.51826400  | -0.88533200 | -0.74869700 |
| S  | 3.20855900  | -0.40993100 | -2.29039500 |
| O  | 5.69852300  | 0.37535700  | 0.57680300  |
| C  | 5.25415800  | 0.48837100  | 1.93420600  |
| O  | 3.24408700  | -0.81149500 | 1.54551800  |
| C  | 4.44234000  | -0.71759400 | 2.33212100  |
| H  | 5.48850000  | 0.55045900  | -2.22108900 |
| H  | 6.15673000  | 0.57321000  | 2.54360600  |
| H  | 4.65766200  | 1.40643700  | 2.04694800  |
| H  | 4.11485400  | -0.65016500 | 3.37200600  |
| H  | 2.14045700  | -2.27123400 | -0.70442400 |
| H  | 0.52262500  | -5.44025400 | 0.55879800  |
| H  | -0.94232700 | -5.03871700 | -0.36775100 |
| H  | 0.54930700  | -5.58119700 | -1.19474100 |

---

|   |             |             |             |
|---|-------------|-------------|-------------|
| H | 5.03167100  | -1.63576600 | 2.20069200  |
| C | -2.29279800 | 1.81358200  | -0.02319500 |
| C | -1.85015900 | 2.74171000  | 0.93007100  |
| C | -3.03203000 | 2.26396300  | -1.12150200 |
| C | -2.15111000 | 4.09138900  | 0.79055600  |
| H | -1.26170500 | 2.40351700  | 1.78310600  |
| C | -3.32573200 | 3.61916200  | -1.26234700 |
| H | -3.38165300 | 1.55571000  | -1.87178700 |
| C | -2.88701800 | 4.53410000  | -0.30890700 |
| H | -1.80247300 | 4.80171500  | 1.53804300  |
| H | -3.90409800 | 3.95768800  | -2.11985600 |
| H | -3.11809400 | 5.59167800  | -0.42033100 |
| C | -2.20923300 | -0.35940200 | 1.85243400  |
| C | -3.30772400 | 0.21566800  | 2.50704200  |
| C | -1.42901700 | -1.30595300 | 2.52940000  |
| C | -3.62301000 | -0.15821700 | 3.81017900  |
| H | -3.91244800 | 0.96554500  | 1.99752200  |
| C | -1.74837100 | -1.67861900 | 3.83266700  |
| H | -0.56812400 | -1.74672300 | 2.02551000  |
| C | -2.84492000 | -1.10582400 | 4.47365700  |
| H | -4.47715100 | 0.29461300  | 4.30960500  |
| H | -1.13431100 | -2.41260700 | 4.35060700  |
| H | -3.09083500 | -1.39319200 | 5.49402000  |
| C | -2.93031900 | -0.83955300 | -0.93197600 |
| C | -2.53312200 | -1.10995300 | -2.24809400 |
| C | -4.20180400 | -1.23754200 | -0.50503000 |
| C | -3.39839900 | -1.75489000 | -3.12706700 |
| H | -1.53417200 | -0.81368700 | -2.57540000 |
| C | -5.06207600 | -1.89188900 | -1.38337300 |
| H | -4.52119100 | -1.04037200 | 0.51775800  |
| C | -4.66360900 | -2.14830600 | -2.69406000 |
| H | -3.08122100 | -1.95814900 | -4.14789600 |
| H | -6.04771900 | -2.20172900 | -1.04168800 |
| H | -5.33830900 | -2.65976900 | -3.37767900 |
| P | -1.76662000 | 0.07575000  | 0.13638200  |
| C | 0.95937300  | 1.46180000  | -0.41393700 |
| C | 0.65026500  | 2.25018500  | -1.52919900 |
| C | 1.65024800  | 2.05151900  | 0.65075800  |
| C | 1.02208500  | 3.59474700  | -1.57847200 |
| H | 0.10115200  | 1.81792300  | -2.36840900 |
| C | 2.01848100  | 3.39845200  | 0.60302500  |
| H | 1.91390500  | 1.45555500  | 1.52593100  |
| C | 1.70825200  | 4.17474300  | -0.51212600 |
| H | 0.76820800  | 4.19151300  | -2.45494800 |

---

|   |            |            |             |
|---|------------|------------|-------------|
| H | 2.55713200 | 3.83817000 | 1.44315000  |
| H | 1.99739300 | 5.22391400 | -0.54988200 |

Post-TS<sub>PE</sub>(L4)

-----  
M06-L electronic energy (Hartree): -2405.520807

M06-L thermal correction to free energy (Hartree): 0.455107

Three lowest frequencies (cm<sup>-1</sup>): 14.28, 16.30, 28.01

-----

|    |             |             |             |
|----|-------------|-------------|-------------|
| Pd | 0.53580600  | 0.25788100  | 0.06014200  |
| O  | 2.30029100  | -1.81633800 | -1.68603400 |
| O  | 0.93512400  | -1.98117900 | 0.09576000  |
| C  | 1.60386300  | -2.50790600 | -0.79555300 |
| C  | 1.71215700  | -3.98281600 | -0.96207600 |
| C  | 4.91597400  | 0.76744800  | 0.07910500  |
| C  | 3.66491600  | 0.13004700  | 0.34763100  |
| C  | 4.76839000  | 1.96417900  | -0.56778500 |
| C  | 2.53928100  | 0.80068600  | -0.09125700 |
| S  | 3.09071400  | 2.28821700  | -0.82546000 |
| O  | 6.12494400  | 0.22439200  | 0.41529200  |
| C  | 5.99661400  | -0.88329300 | 1.31285500  |
| O  | 3.61240900  | -1.08603800 | 0.99443200  |
| C  | 4.85718200  | -1.78105600 | 0.90189700  |
| H  | 5.54752900  | 2.64397700  | -0.89072100 |
| H  | 6.95300100  | -1.41166800 | 1.27899100  |
| H  | 5.83222500  | -0.51060000 | 2.33478100  |
| H  | 4.77587400  | -2.64507700 | 1.56653700  |
| H  | 2.26215700  | -0.85725200 | -1.41856400 |
| H  | 2.62070000  | -4.33327300 | -0.45784600 |
| H  | 0.85236200  | -4.47832900 | -0.50766500 |
| H  | 1.79528100  | -4.25454800 | -2.01722700 |
| H  | 5.00469700  | -2.13787900 | -0.13020600 |
| C  | -2.99760200 | 0.82239400  | -0.41780400 |
| C  | -3.36910400 | 1.82279800  | 0.49178800  |
| C  | -3.51623000 | 0.85580900  | -1.71630300 |
| C  | -4.24893800 | 2.82962100  | 0.11015600  |
| H  | -2.96316900 | 1.81435300  | 1.50336600  |
| C  | -4.39302100 | 1.86982200  | -2.09711500 |
| H  | -3.23906500 | 0.08577100  | -2.43516500 |
| C  | -4.76037100 | 2.85776300  | -1.18700700 |
| H  | -4.53001400 | 3.59943500  | 0.82652900  |
| H  | -4.79320200 | 1.88234700  | -3.10909700 |
| H  | -5.44562700 | 3.64836200  | -1.48628600 |
| C  | -2.30811100 | -0.97893200 | 1.71424300  |

---

|   |             |             |             |
|---|-------------|-------------|-------------|
| C | -3.66803700 | -1.12504900 | 2.02186400  |
| C | -1.34841500 | -1.30584100 | 2.68062800  |
| C | -4.05682800 | -1.59753700 | 3.27169600  |
| H | -4.42317300 | -0.86242300 | 1.28103200  |
| C | -1.74054100 | -1.78013900 | 3.93014200  |
| H | -0.29017300 | -1.18060600 | 2.44576000  |
| C | -3.09407100 | -1.92632800 | 4.22572400  |
| H | -5.11445300 | -1.70777600 | 3.50253000  |
| H | -0.98775700 | -2.02864600 | 4.67542400  |
| H | -3.40121200 | -2.29216100 | 5.20347600  |
| C | -1.94095900 | -1.80229200 | -1.05523200 |
| C | -1.27437200 | -1.73800800 | -2.28828300 |
| C | -2.67069500 | -2.95118000 | -0.73562500 |
| C | -1.34839600 | -2.79586400 | -3.18866600 |
| H | -0.67987900 | -0.85394500 | -2.53192000 |
| C | -2.73627300 | -4.01373500 | -1.63569600 |
| H | -3.18270100 | -3.02372700 | 0.22290500  |
| C | -2.07785000 | -3.93862300 | -2.86074000 |
| H | -0.82530200 | -2.73325000 | -4.14093700 |
| H | -3.30277900 | -4.90535600 | -1.37426900 |
| H | -2.12710400 | -4.77233500 | -3.55825000 |
| P | -1.73496000 | -0.39090800 | 0.08799500  |
| C | 0.04689600  | 2.19288500  | 0.03983700  |
| C | -0.25136000 | 2.83768800  | -1.16700400 |
| C | -0.01860400 | 2.92900800  | 1.22878900  |
| C | -0.59826300 | 4.18992300  | -1.18483000 |
| H | -0.21388900 | 2.28320300  | -2.10666400 |
| C | -0.36959300 | 4.28066900  | 1.20955000  |
| H | 0.20906400  | 2.44944000  | 2.18208500  |
| C | -0.65543500 | 4.91773900  | 0.00292500  |
| H | -0.82492400 | 4.67485700  | -2.13447900 |
| H | -0.41357000 | 4.83802900  | 2.14531400  |
| H | -0.92434000 | 5.97272800  | -0.01129400 |

Int<sub>PE</sub>(L5)

-----  
M06-L electronic energy (Hartree): -1742.586723

M06-L thermal correction to free energy (Hartree): 0.434317

Three lowest frequencies (cm<sup>-1</sup>): 22.25, 25.27, 32.48

-----

|    |             |            |            |
|----|-------------|------------|------------|
| Pd | -0.07104800 | 1.53016800 | 0.21989200 |
| O  | 1.94972500  | 2.56623700 | 0.17851900 |
| O  | 0.07055600  | 3.72283100 | 0.35869900 |
| C  | 1.34575200  | 3.67861400 | 0.27713400 |

---

|   |             |             |             |
|---|-------------|-------------|-------------|
| C | 2.11758900  | 4.96387000  | 0.26814200  |
| H | 3.16247300  | 4.80051600  | 0.54278200  |
| H | 2.09433600  | 5.39403600  | -0.74003400 |
| H | 1.66466700  | 5.69545500  | 0.94318100  |
| C | -0.86350000 | -1.71515700 | -0.95584100 |
| C | -2.12538000 | -2.03369600 | -0.40413200 |
| C | -0.56112400 | -2.12090300 | -2.26458800 |
| C | -3.04025700 | -2.72529300 | -1.20574800 |
| C | -1.48810300 | -2.80737700 | -3.04011200 |
| H | 0.41909900  | -1.90314300 | -2.68376900 |
| C | -2.73994200 | -3.10386600 | -2.50860900 |
| H | -4.01701300 | -2.96445600 | -0.78495400 |
| H | -1.22899900 | -3.10879600 | -4.05267500 |
| H | -3.47972500 | -3.63449300 | -3.10484000 |
| C | 0.71190200  | -1.66119200 | 1.47835300  |
| C | 0.37405400  | -3.02193900 | 1.50935100  |
| C | 1.37602600  | -1.08347900 | 2.58356300  |
| C | 0.65993800  | -3.81052800 | 2.61801200  |
| H | -0.11725700 | -3.47383400 | 0.64957500  |
| C | 1.65094900  | -1.89742100 | 3.68771800  |
| C | 1.29659900  | -3.24197500 | 3.71671900  |
| H | 0.38846700  | -4.86394000 | 2.61728200  |
| H | 2.16436200  | -1.45632700 | 4.54150800  |
| H | 1.52614800  | -3.84499600 | 4.59300500  |
| C | 1.90802400  | -0.74768700 | -0.99459900 |
| C | 2.06876200  | 0.00652200  | -2.18232200 |
| C | 2.97985000  | -1.51430300 | -0.51459000 |
| C | 3.29922600  | -0.05897700 | -2.84348100 |
| C | 4.19816400  | -1.55056600 | -1.18487500 |
| H | 2.86067500  | -2.09727000 | 0.39613100  |
| C | 4.35799300  | -0.81870300 | -2.35639900 |
| H | 3.42254200  | 0.50831500  | -3.76556800 |
| H | 5.01318400  | -2.15481100 | -0.79245000 |
| H | 5.30318400  | -0.84019600 | -2.89522900 |
| P | 0.34244800  | -0.69139900 | -0.03419100 |
| C | 1.81738000  | 0.34639300  | 2.60900800  |
| H | 2.39776200  | 0.62062200  | 1.71873000  |
| H | 0.96135800  | 1.03763600  | 2.63580600  |
| H | 2.43558800  | 0.54791800  | 3.49014600  |
| C | 0.99523700  | 0.87894100  | -2.76186400 |
| H | 0.95321400  | 1.84661900  | -2.24132800 |
| H | 1.19037400  | 1.08172200  | -3.82057100 |
| H | -0.00556200 | 0.43614500  | -2.68662400 |
| C | -2.53206900 | -1.71261900 | 1.00341800  |

---

|   |             |             |             |
|---|-------------|-------------|-------------|
| H | -1.89670000 | -0.96333400 | 1.48230600  |
| H | -3.56080500 | -1.33309100 | 1.02774800  |
| H | -2.49871000 | -2.61463600 | 1.62999200  |
| C | -2.04849600 | 1.34302600  | 0.20329800  |
| C | -2.76641100 | 0.98732500  | -0.94171100 |
| C | -2.74359400 | 1.76004500  | 1.34507400  |
| C | -4.16216500 | 1.04632600  | -0.94442800 |
| H | -2.24578900 | 0.64246900  | -1.83710400 |
| C | -4.13856300 | 1.81125900  | 1.34016500  |
| H | -2.19932600 | 2.04174000  | 2.24766600  |
| C | -4.85153000 | 1.45138800  | 0.19673300  |
| H | -4.70894000 | 0.76438300  | -1.84413100 |
| H | -4.66775300 | 2.13044900  | 2.23763200  |
| H | -5.93951200 | 1.48782700  | 0.19553100  |

Pre-TS<sub>PE</sub>(L5)

-----  
M06-L electronic energy (Hartree): -2523.507589

M06-L thermal correction to free energy (Hartree): 0.544222

Three lowest frequencies (cm<sup>-1</sup>): 27.69, 36.44, 38.45

-----

|    |             |             |             |
|----|-------------|-------------|-------------|
| Pd | 0.52886900  | -0.61622600 | 0.13933600  |
| O  | 0.23397300  | -3.53692500 | -0.82262700 |
| O  | -0.45060800 | -2.38995600 | 0.99028300  |
| C  | -0.42907600 | -3.42901000 | 0.22558000  |
| C  | -1.32753100 | -4.56379100 | 0.67432400  |
| C  | 4.41054700  | -0.50573100 | -0.19627600 |
| C  | 3.55154300  | -1.06384700 | 0.78292400  |
| C  | 4.09532300  | -0.93105400 | -1.46511800 |
| C  | 2.51748700  | -1.83247000 | 0.24723500  |
| S  | 2.74619200  | -1.98420400 | -1.48711600 |
| O  | 5.43218100  | 0.33751500  | 0.10534500  |
| C  | 5.33740800  | 0.82628400  | 1.45153400  |
| O  | 3.71632500  | -0.86262300 | 2.10517000  |
| C  | 5.00320400  | -0.28452400 | 2.41238900  |
| H  | 4.55236400  | -0.59215800 | -2.38778000 |
| H  | 6.31131400  | 1.26223100  | 1.68373300  |
| H  | 4.57099100  | 1.61074300  | 1.49212700  |
| H  | 4.92476900  | 0.08648400  | 3.43570000  |
| H  | 2.03076500  | -2.64645400 | 0.77451200  |
| H  | -1.05147100 | -5.50613400 | 0.19266300  |
| H  | -1.31051300 | -4.68631200 | 1.76204500  |
| H  | -2.36213400 | -4.32706900 | 0.39313900  |
| H  | 5.75878300  | -1.07922900 | 2.37224600  |

---

|   |             |             |             |
|---|-------------|-------------|-------------|
| C | -1.85217500 | 1.82784900  | -0.90598700 |
| C | -1.35437300 | 3.06340600  | -0.42909900 |
| C | -2.49848500 | 1.78086900  | -2.14779400 |
| C | -1.47524800 | 4.18682000  | -1.25236500 |
| C | -2.61476500 | 2.91555900  | -2.94489700 |
| H | -2.92939400 | 0.84447700  | -2.49695600 |
| C | -2.08601100 | 4.12281900  | -2.50084800 |
| H | -1.08307500 | 5.13746100  | -0.89096100 |
| H | -3.11884300 | 2.85067000  | -3.90705500 |
| H | -2.15688200 | 5.01635200  | -3.11809800 |
| C | -2.37826800 | 0.73424500  | 1.66044000  |
| C | -3.63850300 | 1.34714000  | 1.56038200  |
| C | -1.78154400 | 0.57260400  | 2.92820400  |
| C | -4.33198800 | 1.77106500  | 2.68588700  |
| H | -4.08130200 | 1.49075300  | 0.57424000  |
| C | -2.50145500 | 1.00912500  | 4.04905000  |
| C | -3.75699400 | 1.59485000  | 3.94184800  |
| H | -5.30941700 | 2.23680600  | 2.58053300  |
| H | -2.04666000 | 0.89113500  | 5.03214800  |
| H | -4.28122600 | 1.92177100  | 4.83793100  |
| C | -2.66675300 | -0.99606600 | -0.66793600 |
| C | -2.34776700 | -1.60207000 | -1.90812400 |
| C | -3.77906900 | -1.45694000 | 0.05025600  |
| C | -3.19314700 | -2.60817700 | -2.38968300 |
| C | -4.59689300 | -2.46671900 | -0.44619800 |
| H | -4.01642500 | -1.02537600 | 1.01875300  |
| C | -4.30768000 | -3.04061700 | -1.67874400 |
| H | -2.95634400 | -3.06424500 | -3.35087400 |
| H | -5.45686200 | -2.79696600 | 0.13291700  |
| H | -4.94074400 | -3.82736500 | -2.08504300 |
| P | -1.57876600 | 0.29476000  | 0.06487300  |
| C | -0.40814200 | 0.01290300  | 3.14191300  |
| H | -0.31259100 | -1.01307600 | 2.76869900  |
| H | 0.35538000  | 0.60659900  | 2.61493600  |
| H | -0.15356600 | 0.01894700  | 4.20721200  |
| C | -1.13082000 | -1.24696100 | -2.70549400 |
| H | -0.23204500 | -1.66818300 | -2.22951800 |
| H | -1.19768800 | -1.65466400 | -3.72044600 |
| H | -0.97846800 | -0.16509400 | -2.79029700 |
| C | -0.76410700 | 3.24607900  | 0.93757100  |
| H | -0.22833900 | 2.36095900  | 1.29505400  |
| H | -0.05843300 | 4.08380100  | 0.94708500  |
| H | -1.54941000 | 3.46335000  | 1.67587300  |
| C | 1.41807100  | 1.03533500  | -0.58483400 |

---

|   |            |            |             |
|---|------------|------------|-------------|
| C | 1.46301300 | 1.28424600 | -1.96167600 |
| C | 2.10839500 | 1.90718600 | 0.26637500  |
| C | 2.17855200 | 2.36895900 | -2.47419400 |
| H | 0.94272800 | 0.62030200 | -2.65336800 |
| C | 2.82274600 | 2.99378600 | -0.24198300 |
| H | 2.09213300 | 1.74416900 | 1.34747100  |
| C | 2.85910900 | 3.22954600 | -1.61509200 |
| H | 2.19762700 | 2.54136000 | -3.55045300 |
| H | 3.35280900 | 3.65766900 | 0.44223000  |
| H | 3.41403500 | 4.07825200 | -2.01190600 |

TS<sub>PE</sub>(L5)

-----

M06-L electronic energy (Hartree): -2523.480565

M06-L thermal correction to free energy (Hartree): 0.540178

Three lowest frequencies (cm<sup>-1</sup>): -786.42, 20.38, 27.74

-----

|    |             |             |             |
|----|-------------|-------------|-------------|
| Pd | -0.60900700 | 0.28413500  | -0.19816600 |
| O  | -1.97031100 | 3.11228000  | -1.10748800 |
| O  | -0.23176400 | 2.47025800  | 0.16090900  |
| C  | -0.88285600 | 3.34476700  | -0.45698700 |
| C  | -0.36324100 | 4.75020700  | -0.49977600 |
| C  | -4.86499700 | -0.06775700 | -0.03040600 |
| C  | -3.62416300 | 0.52337900  | 0.33369100  |
| C  | -4.89829700 | -0.42817700 | -1.35434500 |
| C  | -2.67679000 | 0.63079600  | -0.68146500 |
| S  | -3.40578100 | -0.06258400 | -2.12240500 |
| O  | -5.89761000 | -0.24203300 | 0.84405700  |
| C  | -5.44922800 | -0.14828000 | 2.20174000  |
| O  | -3.37635600 | 0.95485400  | 1.60166600  |
| C  | -4.57099400 | 1.06153000  | 2.39278600  |
| H  | -5.73077500 | -0.87069700 | -1.88955300 |
| H  | -6.35041300 | -0.08204500 | 2.81525500  |
| H  | -4.90121800 | -1.06445700 | 2.46831000  |
| H  | -4.23696500 | 1.15018800  | 3.42886000  |
| H  | -2.26744900 | 1.95882800  | -0.93228400 |
| H  | -1.16981400 | 5.47748200  | -0.61753300 |
| H  | 0.22316900  | 4.97181200  | 0.39507800  |
| H  | 0.30477800  | 4.84392400  | -1.36486100 |
| H  | -5.10976700 | 1.97616300  | 2.10930300  |
| C  | 2.53411100  | -1.45646800 | -0.61127300 |
| C  | 2.33490200  | -2.74101600 | -0.05483900 |
| C  | 3.31216600  | -1.32118000 | -1.76902400 |
| C  | 2.90417900  | -3.83941400 | -0.70646800 |

---

|   |             |             |             |
|---|-------------|-------------|-------------|
| C | 3.87007300  | -2.42956200 | -2.39773200 |
| H | 3.49470200  | -0.33155600 | -2.18412700 |
| C | 3.65702100  | -3.69799500 | -1.86699200 |
| H | 2.74063700  | -4.83203300 | -0.28632700 |
| H | 4.46886800  | -2.29759900 | -3.29669000 |
| H | 4.07999100  | -4.57626400 | -2.35151700 |
| C | 2.40464500  | -0.02624500 | 1.84071800  |
| C | 3.75281500  | -0.39218800 | 1.98255600  |
| C | 1.63660700  | 0.25638500  | 2.98918100  |
| C | 4.35158100  | -0.48046200 | 3.23292800  |
| H | 4.34061400  | -0.61643500 | 1.09230200  |
| C | 2.25990300  | 0.15340100  | 4.23938900  |
| C | 3.59546800  | -0.20852700 | 4.37005900  |
| H | 5.39884200  | -0.76362600 | 3.31608700  |
| H | 1.66985800  | 0.36460100  | 5.13081100  |
| H | 4.04423700  | -0.28060600 | 5.35901900  |
| C | 2.49948200  | 1.46851000  | -0.65425500 |
| C | 2.14926600  | 1.85143600  | -1.97126700 |
| C | 3.36644700  | 2.28284700  | 0.08531700  |
| C | 2.71324000  | 3.01879900  | -2.49585000 |
| C | 3.89816400  | 3.45179100  | -0.45136700 |
| H | 3.62922400  | 2.00655700  | 1.10347400  |
| C | 3.57266300  | 3.82079600  | -1.75139600 |
| H | 2.45540600  | 3.30577400  | -3.51537300 |
| H | 4.56688100  | 4.06568000  | 0.14866000  |
| H | 3.98357700  | 4.72945800  | -2.18758900 |
| P | 1.71497200  | 0.00378300  | 0.13718700  |
| C | 0.18882800  | 0.63949200  | 2.93936400  |
| H | 0.01367300  | 1.52144800  | 2.31160200  |
| H | -0.43244700 | -0.16486600 | 2.51763300  |
| H | -0.18865700 | 0.85650700  | 3.94466100  |
| C | 1.17610700  | 1.09309800  | -2.82696200 |
| H | 0.13859200  | 1.38833800  | -2.60690900 |
| H | 1.35306700  | 1.29693700  | -3.88919700 |
| H | 1.22630200  | 0.00704700  | -2.68387100 |
| C | 1.57173500  | -2.97670500 | 1.21356900  |
| H | 0.74491600  | -2.26996700 | 1.34767100  |
| H | 1.14574700  | -3.98624000 | 1.22535200  |
| H | 2.22422100  | -2.88121500 | 2.09321500  |
| C | -1.00625200 | -1.65764900 | -0.48185900 |
| C | -0.50247900 | -2.38493500 | -1.56473300 |
| C | -1.86364900 | -2.31114100 | 0.41615100  |
| C | -0.83415000 | -3.73040500 | -1.74142900 |
| H | 0.17303900  | -1.90940500 | -2.27960400 |

---

|   |             |             |             |
|---|-------------|-------------|-------------|
| C | -2.19180100 | -3.65588600 | 0.24312600  |
| H | -2.28124600 | -1.76579000 | 1.26475900  |
| C | -1.67870100 | -4.37213300 | -0.83820300 |
| H | -0.41958300 | -4.27799100 | -2.58840400 |
| H | -2.85581800 | -4.14388300 | 0.95717300  |
| H | -1.93643000 | -5.42124600 | -0.97587800 |

Post-TS<sub>PE</sub>(L5)

-----  
M06-L electronic energy (Hartree): -2523.488200

M06-L thermal correction to free energy (Hartree): 0.535882

Three lowest frequencies (cm<sup>-1</sup>): 14.20, 20.20, 24.76

-----

|    |             |             |             |
|----|-------------|-------------|-------------|
| Pd | 0.65375200  | 0.29789400  | 0.05692300  |
| O  | 2.45122400  | -1.92989800 | -1.58650700 |
| O  | 1.00345200  | -1.96644700 | 0.13462900  |
| C  | 1.69342400  | -2.55754800 | -0.69789100 |
| C  | 1.76913800  | -4.04149000 | -0.78422900 |
| C  | 5.02618800  | 0.60589000  | 0.05513200  |
| C  | 3.74202300  | 0.10103300  | 0.42929500  |
| C  | 4.94672400  | 1.65428500  | -0.82150100 |
| C  | 2.66004500  | 0.73150900  | -0.15236400 |
| S  | 3.28957500  | 2.00856900  | -1.16195700 |
| O  | 6.20182500  | 0.07878500  | 0.51169800  |
| C  | 6.00727000  | -0.81879800 | 1.60994200  |
| O  | 3.61713200  | -0.96183600 | 1.29609500  |
| C  | 4.82531100  | -1.72257000 | 1.36529700  |
| H  | 5.76271700  | 2.21141100  | -1.26540200 |
| H  | 6.93434500  | -1.39089100 | 1.69983100  |
| H  | 5.85479700  | -0.24091700 | 2.53352800  |
| H  | 4.69422100  | -2.43232900 | 2.18592300  |
| H  | 2.43762200  | -0.96041600 | -1.35592800 |
| H  | 2.65197700  | -4.38452100 | -0.23179300 |
| H  | 0.88212300  | -4.49254100 | -0.33655600 |
| H  | 1.88170600  | -4.36938200 | -1.82051400 |
| H  | 4.96228900  | -2.28294500 | 0.42652700  |
| C  | -2.95542600 | 0.78448300  | -0.53745800 |
| C  | -3.26451200 | 1.92790000  | 0.23400800  |
| C  | -3.62108600 | 0.57225100  | -1.75149200 |
| C  | -4.19775700 | 2.83681000  | -0.27388300 |
| C  | -4.55031300 | 1.48866500  | -2.23437500 |
| H  | -3.42106200 | -0.33210300 | -2.32408500 |
| C  | -4.83004300 | 2.63464700  | -1.49633400 |
| H  | -4.42833300 | 3.72591800  | 0.31329100  |

---

|   |             |             |             |
|---|-------------|-------------|-------------|
| H | -5.05244000 | 1.30261900  | -3.18154900 |
| H | -5.54731400 | 3.36550200  | -1.86501900 |
| C | -2.43857300 | -0.97862300 | 1.61129800  |
| C | -3.81264100 | -1.26479700 | 1.57580500  |
| C | -1.73670800 | -1.08920600 | 2.82941600  |
| C | -4.49902700 | -1.66886900 | 2.71366000  |
| H | -4.35151400 | -1.16493900 | 0.63314800  |
| C | -2.45066100 | -1.49358100 | 3.96533400  |
| C | -3.80949900 | -1.78187000 | 3.91837900  |
| H | -5.56322700 | -1.88821400 | 2.65962400  |
| H | -1.91639900 | -1.57423700 | 4.91157600  |
| H | -4.33014400 | -2.08957300 | 4.82323000  |
| C | -1.73841300 | -1.82134800 | -1.09065000 |
| C | -1.20552800 | -1.73061000 | -2.40168900 |
| C | -2.19167600 | -3.06278100 | -0.62540200 |
| C | -1.17886800 | -2.88664400 | -3.18902400 |
| C | -2.14982000 | -4.19981600 | -1.42755400 |
| H | -2.57910700 | -3.14920500 | 0.38681600  |
| C | -1.64221800 | -4.11152200 | -2.71844600 |
| H | -0.77364400 | -2.81546900 | -4.19815600 |
| H | -2.51076900 | -5.14919300 | -1.03707100 |
| H | -1.59884900 | -4.99136300 | -3.35748100 |
| P | -1.66669500 | -0.37960600 | 0.05261200  |
| C | -0.28009000 | -0.76749500 | 2.97652500  |
| H | 0.35006900  | -1.38627800 | 2.32661000  |
| H | -0.06451300 | 0.27827100  | 2.71053000  |
| H | 0.04719600  | -0.92150500 | 4.01030000  |
| C | -0.65534800 | -0.46147500 | -2.97975800 |
| H | 0.17274100  | -0.06287800 | -2.37013100 |
| H | -0.27912000 | -0.62439700 | -3.99495400 |
| H | -1.40665700 | 0.33776400  | -3.02779600 |
| C | -2.67801300 | 2.17511200  | 1.59086300  |
| H | -1.63410200 | 1.84736700  | 1.66574800  |
| H | -2.70710800 | 3.24160400  | 1.83998300  |
| H | -3.24101200 | 1.63770300  | 2.36746600  |
| C | 0.30948400  | 2.26829300  | -0.02358500 |
| C | -0.35796300 | 2.84228400  | -1.11137800 |
| C | 0.73788800  | 3.10933000  | 1.01380700  |
| C | -0.60177400 | 4.21737500  | -1.15758100 |
| H | -0.71110800 | 2.21560700  | -1.93230200 |
| C | 0.48210300  | 4.47993900  | 0.97407600  |
| H | 1.28194900  | 2.69221100  | 1.86193200  |
| C | -0.18717300 | 5.04099800  | -0.11389400 |
| H | -1.12862000 | 4.64000700  | -2.01343300 |

---

|   |             |            |             |
|---|-------------|------------|-------------|
| H | 0.81784000  | 5.11370400 | 1.79492700  |
| H | -0.37978900 | 6.11209500 | -0.14852900 |

Int<sub>PE</sub>(L6)

-----  
M06-L electronic energy (Hartree): -1968.255932

M06-L thermal correction to free energy (Hartree): 0.443205

Three lowest frequencies (cm<sup>-1</sup>): 17.79, 22.58, 27.88

-----

|   |             |             |             |
|---|-------------|-------------|-------------|
| C | -0.48471300 | -1.97868000 | -1.17617200 |
| C | -1.49188300 | -1.66924500 | -2.11464400 |
| C | 0.19513900  | -3.19254000 | -1.29994200 |
| C | -1.78300900 | -2.55333500 | -3.15634100 |
| C | -0.09626000 | -4.08061700 | -2.33174800 |
| H | 0.96650400  | -3.44381500 | -0.57384300 |
| C | -1.08194400 | -3.75230200 | -3.25790900 |
| H | -2.55620500 | -2.31362700 | -3.88064000 |
| H | 0.44471400  | -5.02051400 | -2.40967400 |
| H | -1.31766500 | -4.43560400 | -4.07153200 |
| C | -1.44049200 | -1.11757300 | 1.39345700  |
| C | -2.40806900 | -2.10898000 | 1.21164500  |
| C | -1.54989400 | -0.26422400 | 2.51356500  |
| C | -3.46364900 | -2.25879800 | 2.10784900  |
| H | -2.33454000 | -2.77050600 | 0.34994500  |
| C | -2.61128100 | -0.40441700 | 3.40908800  |
| C | -3.56113000 | -1.40182900 | 3.19968000  |
| H | -4.20518600 | -3.03796700 | 1.94935300  |
| H | -2.69687600 | 0.25377100  | 4.26894800  |
| H | -4.38388600 | -1.50469100 | 3.90448700  |
| C | 1.40293600  | -1.42105300 | 0.93681800  |
| C | 2.59788300  | -1.42405000 | 0.18545300  |
| C | 1.45802100  | -1.78518300 | 2.28465300  |
| C | 3.81104500  | -1.75817100 | 0.79106900  |
| C | 2.66472900  | -2.12507300 | 2.89041100  |
| H | 0.54169200  | -1.79679300 | 2.87101400  |
| C | 3.83684500  | -2.10126300 | 2.14013800  |
| H | 4.73279900  | -1.74804900 | 0.21648100  |
| H | 2.68623300  | -2.40406700 | 3.94104000  |
| H | 4.78794300  | -2.35741900 | 2.60310400  |
| P | -0.12375900 | -0.80211200 | 0.16909100  |
| O | -0.56387300 | 0.65842100  | 2.64784400  |
| O | 2.46997700  | -1.09758400 | -1.12153600 |
| O | -2.14058300 | -0.49837100 | -1.91190600 |
| C | -3.12493600 | -0.09899800 | -2.85333700 |

---

|    |             |             |             |
|----|-------------|-------------|-------------|
| H  | -3.96197600 | -0.80830100 | -2.87498000 |
| H  | -3.47292300 | 0.87479300  | -2.50626700 |
| H  | -2.69634100 | -0.00891600 | -3.85948600 |
| C  | -0.73000400 | 1.67135300  | 3.62905200  |
| H  | 0.10949800  | 2.35486700  | 3.49278200  |
| H  | -1.67407500 | 2.21062500  | 3.47896000  |
| H  | -0.70244600 | 1.25289100  | 4.64276800  |
| C  | 3.66040800  | -0.86600500 | -1.86090800 |
| H  | 4.27434600  | -0.09624900 | -1.37577500 |
| H  | 4.24033700  | -1.79042400 | -1.97790900 |
| H  | 3.33713300  | -0.51038300 | -2.84011500 |
| Pd | -0.34892800 | 1.39346900  | -0.36327700 |
| O  | -1.05070200 | 3.42805500  | -0.83538900 |
| O  | -2.57533200 | 1.92952700  | -0.25559700 |
| C  | -2.27012700 | 3.10036500  | -0.63118800 |
| C  | -3.34964300 | 4.11183800  | -0.88594900 |
| H  | -3.74774900 | 3.96601600  | -1.89762800 |
| H  | -4.18062700 | 3.97988400  | -0.18742400 |
| H  | -2.96625800 | 5.13324100  | -0.82025600 |
| C  | 1.60402000  | 1.74095200  | -0.42473000 |
| C  | 2.41842500  | 1.66614900  | 0.71041300  |
| C  | 2.12952600  | 2.28396000  | -1.60423800 |
| C  | 3.73239000  | 2.13930300  | 0.66834500  |
| H  | 2.03446500  | 1.22919900  | 1.63363500  |
| C  | 3.44428400  | 2.75240900  | -1.64242900 |
| H  | 1.51177300  | 2.35070200  | -2.50073000 |
| C  | 4.25022100  | 2.68248500  | -0.50637700 |
| H  | 4.35294100  | 2.07721600  | 1.56258800  |
| H  | 3.83879800  | 3.17017100  | -2.56866200 |
| H  | 5.27571800  | 3.04682600  | -0.53748200 |

Pre-TS<sub>PE</sub>(L6)

-----  
M06-L electronic energy (Hartree): -2749.175905

M06-L thermal correction to free energy (Hartree): 0.554784

Three lowest frequencies (cm<sup>-1</sup>): 31.91, 36.66, 38.81

-----

|   |            |             |            |
|---|------------|-------------|------------|
| C | 2.34851000 | -1.10474500 | 1.41813700 |
| C | 1.63613200 | -1.39195400 | 2.60113500 |
| C | 3.64188700 | -1.61810200 | 1.27570800 |
| C | 2.24140200 | -2.14431600 | 3.61428000 |
| C | 4.24799600 | -2.36334700 | 2.28219700 |
| H | 4.17934300 | -1.43291400 | 0.34471000 |
| C | 3.53898700 | -2.61919600 | 3.45219300 |

---

|    |             |             |             |
|----|-------------|-------------|-------------|
| H  | 1.69684700  | -2.37027700 | 4.52667900  |
| H  | 5.25701900  | -2.74605700 | 2.14864800  |
| H  | 3.99226500  | -3.20390200 | 4.25059600  |
| C  | 2.66703900  | 1.16964600  | -0.36083800 |
| C  | 3.78147400  | 1.50175400  | 0.41588600  |
| C  | 2.28091200  | 2.06031200  | -1.38845800 |
| C  | 4.51945100  | 2.65765900  | 0.16994000  |
| H  | 4.07158100  | 0.85007900  | 1.23708700  |
| C  | 3.01311000  | 3.22413300  | -1.63134200 |
| C  | 4.13211900  | 3.51310900  | -0.85670300 |
| H  | 5.38590800  | 2.88867300  | 0.78529000  |
| H  | 2.71079000  | 3.90562900  | -2.42139200 |
| H  | 4.69775400  | 4.42109200  | -1.05809000 |
| C  | 1.85678600  | -1.43856300 | -1.35866400 |
| C  | 1.32845100  | -2.74153400 | -1.22173100 |
| C  | 2.50450800  | -1.10216300 | -2.54717000 |
| C  | 1.42623800  | -3.65904000 | -2.26848300 |
| C  | 2.60926300  | -2.01625200 | -3.59416200 |
| H  | 2.93445200  | -0.10888200 | -2.65622800 |
| C  | 2.06000200  | -3.28669900 | -3.45261200 |
| H  | 1.01000500  | -4.65751900 | -2.16538500 |
| H  | 3.11970700  | -1.73431700 | -4.51235400 |
| H  | 2.12950000  | -4.00701900 | -4.26580500 |
| P  | 1.57522300  | -0.25210700 | -0.00209600 |
| O  | 1.18874000  | 1.70467700  | -2.10890900 |
| O  | 0.75670300  | -3.01418100 | -0.02512900 |
| O  | 0.36294800  | -0.93798700 | 2.67833100  |
| C  | -0.42142100 | -1.31871100 | 3.79532300  |
| H  | -0.01021300 | -0.92065300 | 4.73182700  |
| H  | -1.40863900 | -0.88660100 | 3.61848200  |
| H  | -0.50494300 | -2.41136000 | 3.86774200  |
| C  | 0.61449300  | 2.69119300  | -2.95551900 |
| H  | -0.31531400 | 2.25633200  | -3.32885500 |
| H  | 0.38974500  | 3.59817800  | -2.38271300 |
| H  | 1.27494600  | 2.92219200  | -3.80117600 |
| C  | 0.18487800  | -4.29326900 | 0.17659300  |
| H  | -0.63796300 | -4.47436200 | -0.52754000 |
| H  | 0.93849500  | -5.08578100 | 0.08131900  |
| H  | -0.20555600 | -4.28045400 | 1.19715900  |
| Pd | -0.51571000 | 0.62463900  | 0.31904500  |
| O  | -0.09760000 | 3.66848500  | 0.12111500  |
| O  | 0.42659800  | 2.09717600  | 1.64912400  |
| C  | 0.47841400  | 3.28728300  | 1.15809100  |
| C  | 1.35125600  | 4.25185000  | 1.93936400  |

---

|   |             |             |             |
|---|-------------|-------------|-------------|
| C | -4.36783000 | 0.67339800  | -0.18593400 |
| C | -3.55022000 | 0.93530600  | 0.94192000  |
| C | -4.00216500 | 1.42419300  | -1.27797200 |
| C | -2.49682600 | 1.80954200  | 0.67691600  |
| S | -2.64977900 | 2.42576900  | -0.95933900 |
| O | -5.39639700 | -0.21659500 | -0.16659200 |
| C | -5.33871200 | -1.06352800 | 0.99035900  |
| O | -3.77055700 | 0.38445700  | 2.15354300  |
| C | -5.05641900 | -0.26312900 | 2.23484400  |
| H | -4.41987200 | 1.35256600  | -2.27559100 |
| H | -6.31310700 | -1.55226500 | 1.05608500  |
| H | -4.56134100 | -1.82468800 | 0.83797700  |
| H | -5.01019100 | -0.90462300 | 3.11684000  |
| H | -2.01944900 | 2.43398400  | 1.42511700  |
| H | 1.20412100  | 4.13971700  | 3.01875000  |
| H | 2.40531600  | 4.02326600  | 1.73532800  |
| H | 1.16315000  | 5.28983300  | 1.64987500  |
| H | -5.82475100 | 0.50575600  | 2.38843600  |
| C | -1.36722800 | -0.75940300 | -0.85433100 |
| C | -1.35222600 | -0.61654400 | -2.24678000 |
| C | -2.07266600 | -1.83854100 | -0.30716200 |
| C | -2.06008100 | -1.49606600 | -3.06867000 |
| H | -0.77764000 | 0.19278500  | -2.69834100 |
| C | -2.77519700 | -2.72478900 | -1.12700300 |
| H | -2.07181500 | -2.00050800 | 0.77459000  |
| C | -2.77905200 | -2.55195900 | -2.51092000 |
| H | -2.04060700 | -1.35857200 | -4.15029200 |
| H | -3.32199600 | -3.55536500 | -0.67734000 |
| H | -3.32985200 | -3.24148300 | -3.14909600 |

TS<sub>PE</sub>(L6)

-----

M06-L electronic energy (Hartree): -2749.147385

M06-L thermal correction to free energy (Hartree): 0.549264

Three lowest frequencies (cm<sup>-1</sup>): -819.07, 21.50, 26.35

-----

|   |            |             |            |
|---|------------|-------------|------------|
| C | 2.17563300 | 0.04886300  | 1.93117200 |
| C | 1.41433800 | 0.78831200  | 2.86092900 |
| C | 3.30998900 | -0.62642100 | 2.38750000 |
| C | 1.78749600 | 0.82858000  | 4.20778100 |
| C | 3.68892900 | -0.58682200 | 3.72655500 |
| H | 3.90702200 | -1.19627300 | 1.67621600 |
| C | 2.92142800 | 0.14097400  | 4.63121100 |
| H | 1.19900800 | 1.39491600  | 4.92420300 |

---

|    |             |             |             |
|----|-------------|-------------|-------------|
| H  | 4.57660400  | -1.12098800 | 4.05731200  |
| H  | 3.20322000  | 0.17980500  | 5.68179100  |
| C  | 2.51700400  | 1.48370100  | -0.52638100 |
| C  | 3.34144800  | 2.31399200  | 0.23406300  |
| C  | 2.18968300  | 1.88250800  | -1.84007600 |
| C  | 3.83488200  | 3.51138800  | -0.28248400 |
| H  | 3.59057800  | 2.02499800  | 1.25399400  |
| C  | 2.67209100  | 3.08325300  | -2.36055100 |
| C  | 3.49277300  | 3.89175600  | -1.57581300 |
| H  | 4.47684000  | 4.14278600  | 0.32733000  |
| H  | 2.41321800  | 3.39024300  | -3.37062200 |
| H  | 3.86516100  | 4.82770000  | -1.98823000 |
| C  | 2.57626100  | -1.40613800 | -0.51898000 |
| C  | 2.33250500  | -2.69638300 | 0.00104200  |
| C  | 3.42655200  | -1.28151200 | -1.61969000 |
| C  | 2.92943400  | -3.81714700 | -0.57989700 |
| C  | 4.01644300  | -2.39754100 | -2.20871500 |
| H  | 3.62935000  | -0.29259700 | -2.02561300 |
| C  | 3.76110300  | -3.66131200 | -1.68586400 |
| H  | 2.74034500  | -4.80997400 | -0.18130700 |
| H  | 4.67446400  | -2.27637300 | -3.06614800 |
| H  | 4.21490000  | -4.54266300 | -2.13578800 |
| P  | 1.67447800  | 0.01867900  | 0.17343400  |
| O  | 1.39383900  | 1.02464300  | -2.52986100 |
| O  | 1.51208400  | -2.74751000 | 1.07573200  |
| O  | 0.34162000  | 1.44379800  | 2.35757000  |
| C  | -0.44394200 | 2.22788100  | 3.23891200  |
| H  | 0.15571500  | 3.01662600  | 3.71124100  |
| H  | -1.21878900 | 2.67564900  | 2.61526800  |
| H  | -0.90903300 | 1.60790100  | 4.01675900  |
| C  | 0.83063000  | 1.47141700  | -3.75240600 |
| H  | 0.11650000  | 0.70002900  | -4.04853800 |
| H  | 0.30695000  | 2.42778100  | -3.62133800 |
| H  | 1.59744500  | 1.58047700  | -4.52991800 |
| C  | 1.19053900  | -4.02264200 | 1.60648600  |
| H  | 0.70445900  | -4.65308700 | 0.85168100  |
| H  | 2.08646000  | -4.52562500 | 1.99391500  |
| H  | 0.49192600  | -3.83532000 | 2.42335800  |
| Pd | -0.61227100 | 0.26308200  | -0.35105100 |
| O  | -2.21762500 | 2.95760300  | -1.40376400 |
| O  | -0.34353100 | 2.49307000  | -0.25160100 |
| C  | -1.10370800 | 3.28946600  | -0.84345500 |
| C  | -0.72319500 | 4.73869500  | -0.95168300 |
| C  | -4.80378600 | -0.31945100 | 0.05408400  |

---

|   |             |             |             |
|---|-------------|-------------|-------------|
| C | -3.58829800 | 0.38382800  | 0.27710600  |
| C | -4.90014900 | -0.78963600 | -1.23148000 |
| C | -2.71949400 | 0.46911900  | -0.80700700 |
| S | -3.49541500 | -0.38060200 | -2.13359900 |
| O | -5.76037200 | -0.49048500 | 1.01268400  |
| C | -5.23534400 | -0.24031500 | 2.32224700  |
| O | -3.29114600 | 0.94073700  | 1.48604600  |
| C | -4.43799200 | 1.03842200  | 2.34450900  |
| H | -5.73215900 | -1.32911400 | -1.66965500 |
| H | -6.09873900 | -0.17812400 | 2.98851700  |
| H | -4.60630500 | -1.08873700 | 2.63041400  |
| H | -4.04865700 | 1.24596700  | 3.34423800  |
| H | -2.41166500 | 1.78860900  | -1.16117700 |
| H | 0.14192400  | 4.96272000  | -0.32364300 |
| H | -0.47250100 | 4.97245400  | -1.99297000 |
| H | -1.56420400 | 5.38118900  | -0.67391600 |
| H | -5.06063400 | 1.88409700  | 2.02050100  |
| C | -0.89109200 | -1.70227100 | -0.58244300 |
| C | -0.35752200 | -2.36033400 | -1.69713400 |
| C | -1.71256600 | -2.42991600 | 0.28939600  |
| C | -0.64290300 | -3.70624200 | -1.93925700 |
| H | 0.29779800  | -1.82110700 | -2.38499300 |
| C | -1.99602000 | -3.77487400 | 0.04938000  |
| H | -2.14774000 | -1.94012000 | 1.16280100  |
| C | -1.46681100 | -4.41864700 | -1.06987200 |
| H | -0.21386000 | -4.19849300 | -2.81305400 |
| H | -2.63637700 | -4.32261300 | 0.74196000  |
| H | -1.69225500 | -5.46723300 | -1.25973400 |

Post-TS<sub>PE</sub>(L6)

-----

M06-L electronic energy (Hartree): -2749.155662

M06-L thermal correction to free energy (Hartree): 0.545390

Three lowest frequencies (cm<sup>-1</sup>): 15.79, 19.96, 21.41

-----

|   |             |             |            |
|---|-------------|-------------|------------|
| C | -2.31831300 | -1.12638200 | 1.61876500 |
| C | -1.46347700 | -1.64104400 | 2.61505600 |
| C | -3.69460000 | -1.12526900 | 1.85664000 |
| C | -1.98954800 | -2.13061700 | 3.81430900 |
| C | -4.22565100 | -1.61470400 | 3.04712700 |
| H | -4.36015600 | -0.73034900 | 1.08928200 |
| C | -3.36629500 | -2.11423900 | 4.02167600 |
| H | -1.33039800 | -2.52522300 | 4.58241400 |
| H | -5.30077600 | -1.60494700 | 3.21000900 |

---

|    |             |             |             |
|----|-------------|-------------|-------------|
| H  | -3.76523800 | -2.49940200 | 4.95828200  |
| C  | -1.67344600 | -1.95782400 | -1.04580800 |
| C  | -2.19023400 | -3.18888700 | -0.63911500 |
| C  | -1.08016000 | -1.87085500 | -2.32461600 |
| C  | -2.13696800 | -4.30843300 | -1.46943600 |
| H  | -2.64131800 | -3.27368100 | 0.34825500  |
| C  | -1.02962400 | -2.98482900 | -3.16354200 |
| C  | -1.55843500 | -4.19946000 | -2.72870300 |
| H  | -2.54858700 | -5.25622200 | -1.13051600 |
| H  | -0.58024000 | -2.91210100 | -4.15002500 |
| H  | -1.51169900 | -5.06377400 | -3.38845800 |
| C  | -2.91651900 | 0.60255500  | -0.59016500 |
| C  | -3.27620800 | 1.74267100  | 0.16086900  |
| C  | -3.50192100 | 0.42092100  | -1.84469000 |
| C  | -4.19171700 | 2.66591200  | -0.34822900 |
| C  | -4.40909600 | 1.34392400  | -2.36141500 |
| H  | -3.24374200 | -0.45924800 | -2.43018200 |
| C  | -4.74639000 | 2.46496500  | -1.60979600 |
| H  | -4.46458400 | 3.54455000  | 0.22935900  |
| H  | -4.85076100 | 1.18189600  | -3.34191000 |
| H  | -5.45342600 | 3.19455600  | -2.00047700 |
| P  | -1.60992000 | -0.49455000 | 0.05543100  |
| O  | -0.57981300 | -0.65156300 | -2.65841200 |
| O  | -2.69017100 | 1.85353500  | 1.37699000  |
| O  | -0.14199800 | -1.63467200 | 2.31975700  |
| C  | 0.76850200  | -2.15147000 | 3.27564700  |
| H  | 0.56816800  | -3.21091200 | 3.48186700  |
| H  | 1.75555800  | -2.04104300 | 2.82283700  |
| H  | 0.72476100  | -1.58425600 | 4.21452800  |
| C  | 0.07853200  | -0.51912800 | -3.90903100 |
| H  | 0.46757700  | 0.50088500  | -3.93019600 |
| H  | 0.91107500  | -1.22853200 | -3.99764300 |
| H  | -0.62110800 | -0.66698600 | -4.74156800 |
| C  | -2.95467000 | 3.02414700  | 2.13315600  |
| H  | -2.66131800 | 3.92471200  | 1.57906200  |
| H  | -4.01545800 | 3.08416500  | 2.41007400  |
| H  | -2.34507800 | 2.93931000  | 3.03408000  |
| Pd | 0.65772900  | 0.31312000  | 0.04298800  |
| O  | 2.70173500  | -1.46520500 | -1.84607600 |
| O  | 1.26358300  | -1.90468600 | -0.16973400 |
| C  | 1.99100300  | -2.28915800 | -1.08400700 |
| C  | 2.16898900  | -3.72588500 | -1.43903600 |
| C  | 4.98384900  | 0.99704700  | 0.20679200  |
| C  | 3.73395300  | 0.37427000  | 0.51114900  |

---

|   |             |             |             |
|---|-------------|-------------|-------------|
| C | 4.84638900  | 2.08244800  | -0.61618900 |
| C | 2.61966200  | 0.94698700  | -0.06839900 |
| S | 3.17527000  | 2.32406300  | -0.98988800 |
| O | 6.18462100  | 0.53766000  | 0.67330800  |
| C | 6.02994300  | -0.43173900 | 1.71530900  |
| O | 3.66929700  | -0.74166400 | 1.31610600  |
| C | 4.92938800  | -1.40910500 | 1.38567900  |
| H | 5.62731900  | 2.72681100  | -1.00130800 |
| H | 6.99636500  | -0.93469300 | 1.80534000  |
| H | 5.80607800  | 0.08071100  | 2.66278600  |
| H | 4.83110900  | -2.16983200 | 2.16481500  |
| H | 2.59009300  | -0.55075900 | -1.46369500 |
| H | 1.38535400  | -4.33056700 | -0.97994500 |
| H | 2.15865400  | -3.85838800 | -2.52488600 |
| H | 3.14449200  | -4.07246600 | -1.07878000 |
| H | 5.13852800  | -1.90734500 | 0.42503400  |
| C | 0.12832400  | 2.23751000  | -0.00639000 |
| C | -0.48228800 | 2.74243100  | -1.16183100 |
| C | 0.39992200  | 3.12453800  | 1.04418200  |
| C | -0.81351900 | 4.09591200  | -1.26350900 |
| H | -0.72142600 | 2.07098500  | -1.98866500 |
| C | 0.06151500  | 4.47427900  | 0.94534300  |
| H | 0.89107200  | 2.76317900  | 1.94823200  |
| C | -0.54313000 | 4.96818900  | -0.21121500 |
| H | -1.29291500 | 4.46476200  | -2.17102100 |
| H | 0.27698500  | 5.14517100  | 1.77757200  |
| H | -0.80063700 | 6.02342800  | -0.29022200 |

Int<sub>PE</sub>(L7)

-----

M06-L electronic energy (Hartree): -1922.387875

M06-L thermal correction to free energy (Hartree): 0.328528

Three lowest frequencies (cm<sup>-1</sup>): 4.28, 30.86, 33.72

-----

|    |             |             |             |
|----|-------------|-------------|-------------|
| Pd | 0.18626600  | 1.55210700  | 0.10561900  |
| O  | 0.64382400  | 3.69854600  | 0.17695200  |
| O  | 2.32355300  | 2.26209200  | 0.05792800  |
| C  | 1.89878100  | 3.45620500  | 0.12616800  |
| C  | 2.85956000  | 4.60550300  | 0.17368900  |
| H  | 2.51254200  | 5.42565300  | -0.46193700 |
| H  | 2.91433200  | 4.99343100  | 1.19752700  |
| H  | 3.86219300  | 4.29774800  | -0.13237900 |
| C  | -1.11263000 | -1.58653800 | -0.87621400 |
| C  | -2.37439700 | -1.68670400 | -0.28425700 |

---

|   |             |             |             |
|---|-------------|-------------|-------------|
| C | -0.96715200 | -2.11708900 | -2.16460300 |
| C | -3.45707800 | -2.27710200 | -0.91251400 |
| C | -2.04210700 | -2.70807000 | -2.82079300 |
| H | 0.00064000  | -2.07676000 | -2.65861700 |
| C | -3.28520700 | -2.78594900 | -2.19678800 |
| H | -4.41154800 | -2.32701300 | -0.39535500 |
| H | -1.90404000 | -3.11442400 | -3.81951100 |
| H | -4.12682500 | -3.24954700 | -2.70608400 |
| C | 0.43235200  | -1.58690900 | 1.55172200  |
| C | -0.14545200 | -2.84016900 | 1.79782500  |
| C | 1.23521500  | -1.04790900 | 2.55935900  |
| C | 0.06253400  | -3.50142200 | 3.00284600  |
| H | -0.75899300 | -3.30609600 | 1.02946700  |
| C | 1.45698900  | -1.68514700 | 3.76909900  |
| C | 0.85972400  | -2.92260200 | 3.98862100  |
| H | -0.39598400 | -4.47287000 | 3.16911100  |
| H | 2.09426900  | -1.21338500 | 4.51196400  |
| H | 1.02536300  | -3.43632000 | 4.93281800  |
| C | 1.73563700  | -1.11993500 | -0.95376400 |
| C | 1.98966300  | -0.51320600 | -2.18718400 |
| C | 2.71146400  | -1.99530000 | -0.45870100 |
| C | 3.14056300  | -0.74594300 | -2.91938600 |
| C | 3.87838500  | -2.24445200 | -1.17399400 |
| H | 2.55039900  | -2.49004400 | 0.49724900  |
| C | 4.09205600  | -1.62085400 | -2.40134900 |
| H | 3.27575900  | -0.24982200 | -3.87654200 |
| H | 4.61973200  | -2.93009500 | -0.77174600 |
| H | 5.00216800  | -1.81451900 | -2.96431400 |
| P | 0.22368600  | -0.69313300 | -0.02358700 |
| F | -2.53805300 | -1.20095900 | 0.96329200  |
| F | 1.84867600  | 0.13434300  | 2.33958700  |
| F | 1.05803300  | 0.32284500  | -2.70187400 |
| C | -1.79962900 | 1.61530700  | 0.11003200  |
| C | -2.56061700 | 1.35858800  | -1.03392500 |
| C | -2.43080100 | 2.09328400  | 1.26389000  |
| C | -3.93977500 | 1.58000700  | -1.02275000 |
| H | -2.08717100 | 0.96858600  | -1.93701500 |
| C | -3.81029100 | 2.30553000  | 1.27144900  |
| H | -1.85042200 | 2.29906200  | 2.16413100  |
| C | -4.56817400 | 2.04581100  | 0.13013300  |
| H | -4.52328900 | 1.37578100  | -1.92036300 |
| H | -4.29247700 | 2.67240000  | 2.17735400  |
| H | -5.64478100 | 2.20753900  | 0.13983000  |

---

Pre-TS<sub>PE</sub>(L7)

-----  
M06-L electronic energy (Hartree): -2703.308347

M06-L thermal correction to free energy (Hartree): 0.434869

Three lowest frequencies (cm<sup>-1</sup>): 18.60, 27.36, 32.23  
-----

|    |             |             |             |
|----|-------------|-------------|-------------|
| Pd | 0.50558800  | -0.62534500 | 0.20090500  |
| O  | 0.08921400  | -3.43987300 | -0.86382500 |
| O  | -0.53059000 | -2.37841600 | 1.02221300  |
| C  | -0.53536500 | -3.38134500 | 0.21211200  |
| C  | -1.41598500 | -4.54219800 | 0.63228100  |
| C  | 4.35614400  | -0.57359400 | -0.23731000 |
| C  | 3.51966100  | -1.13063700 | 0.76128300  |
| C  | 3.99496300  | -0.97889100 | -1.50042400 |
| C  | 2.45245000  | -1.87258000 | 0.24879400  |
| S  | 2.62528100  | -2.00512900 | -1.49529300 |
| O  | 5.40044900  | 0.24929900  | 0.04304900  |
| C  | 5.34667000  | 0.72929900  | 1.39487500  |
| O  | 3.73204600  | -0.95376200 | 2.07930100  |
| C  | 5.03128500  | -0.38791100 | 2.35476500  |
| H  | 4.43024300  | -0.63664700 | -2.43233000 |
| H  | 6.33009800  | 1.15584800  | 1.60304200  |
| H  | 4.58672200  | 1.51893400  | 1.46205100  |
| H  | 4.98469500  | -0.02675900 | 3.38356700  |
| H  | 1.97765600  | -2.69116700 | 0.78097700  |
| H  | -1.03294700 | -5.48951700 | 0.24127800  |
| H  | -1.52256600 | -4.60641100 | 1.71929300  |
| H  | -2.41947700 | -4.39410300 | 0.21217400  |
| H  | 5.77931300  | -1.18779800 | 2.28545300  |
| C  | -1.77715800 | 1.87737800  | -0.85049200 |
| C  | -1.26290300 | 3.05248100  | -0.29758200 |
| C  | -2.34633800 | 1.96541300  | -2.12565300 |
| C  | -1.27795300 | 4.26772900  | -0.95815700 |
| C  | -2.37482000 | 3.17607800  | -2.81246100 |
| H  | -2.77437600 | 1.07788400  | -2.58603300 |
| C  | -1.83470900 | 4.32243400  | -2.23374700 |
| H  | -0.85298800 | 5.14392600  | -0.47528300 |
| H  | -2.82230800 | 3.22230800  | -3.80233700 |
| H  | -1.85015400 | 5.26776800  | -2.77147900 |
| C  | -2.41792300 | 0.67343900  | 1.63554500  |
| C  | -3.70002500 | 1.24655200  | 1.61803400  |
| C  | -1.83328200 | 0.45931000  | 2.88432400  |
| C  | -4.36989200 | 1.55540700  | 2.79498400  |
| H  | -4.17362900 | 1.44818400  | 0.65702000  |

---

|   |             |             |             |
|---|-------------|-------------|-------------|
| C | -2.48261900 | 0.76042400  | 4.07347400  |
| C | -3.75918000 | 1.30713700  | 4.02429900  |
| H | -5.36445700 | 1.99230700  | 2.75309100  |
| H | -1.97546500 | 0.57221600  | 5.01591500  |
| H | -4.27470100 | 1.54794400  | 4.95127300  |
| C | -2.62478700 | -0.89179800 | -0.78258700 |
| C | -2.21655900 | -1.39264500 | -2.02170300 |
| C | -3.77240000 | -1.46238100 | -0.21569300 |
| C | -2.89812300 | -2.38802100 | -2.69982400 |
| C | -4.47687600 | -2.46453800 | -0.87676400 |
| H | -4.11224500 | -1.12496500 | 0.76095200  |
| C | -4.04187100 | -2.92577900 | -2.11772600 |
| H | -2.52560200 | -2.73053300 | -3.66130400 |
| H | -5.36562900 | -2.88897700 | -0.41578500 |
| H | -4.58756800 | -3.71165900 | -2.63472300 |
| P | -1.55506300 | 0.32006400  | 0.06811300  |
| F | -0.72643200 | 2.99809600  | 0.94137100  |
| F | -0.58276500 | -0.03735000 | 2.96922400  |
| F | -1.10358200 | -0.87754200 | -2.59363000 |
| C | 1.40348900  | 1.03440400  | -0.48512600 |
| C | 1.43990400  | 1.31246900  | -1.85659700 |
| C | 2.07437100  | 1.89538700  | 0.39032300  |
| C | 2.15977200  | 2.40483600  | -2.34503600 |
| H | 0.90281800  | 0.67000500  | -2.55516500 |
| C | 2.79227000  | 2.98993100  | -0.09699700 |
| H | 2.04230200  | 1.71459200  | 1.46761400  |
| C | 2.84280900  | 3.24446300  | -1.46692300 |
| H | 2.18069200  | 2.60106900  | -3.41731400 |
| H | 3.31615000  | 3.64459600  | 0.60067000  |
| H | 3.40373700  | 4.09756200  | -1.84559200 |

TS<sub>PE</sub>(L7)

-----

M06-L electronic energy (Hartree): -2703.280258

M06-L thermal correction to free energy (Hartree): 0.424653

Three lowest frequencies (cm<sup>-1</sup>): -683.06, 9.17, 19.68

-----

|    |             |            |             |
|----|-------------|------------|-------------|
| Pd | -0.54935900 | 0.44030600 | -0.29213500 |
| O  | -1.92204000 | 3.40823400 | -0.76782100 |
| O  | 0.02064400  | 2.57899700 | 0.00254400  |
| C  | -0.71056400 | 3.53355700 | -0.34644900 |
| C  | -0.16383900 | 4.93064400 | -0.31601600 |
| C  | -4.77251700 | 0.02896500 | -0.17629200 |
| C  | -3.55186300 | 0.60243900 | 0.27239000  |

---

|   |             |             |             |
|---|-------------|-------------|-------------|
| C | -4.79805100 | -0.13430000 | -1.53892100 |
| C | -2.61016600 | 0.88752300  | -0.71310700 |
| S | -3.32275000 | 0.39742200  | -2.24168900 |
| O | -5.79435900 | -0.31117200 | 0.66147400  |
| C | -5.33694500 | -0.41825800 | 2.01507900  |
| O | -3.31116700 | 0.84578000  | 1.59045500  |
| C | -4.50161300 | 0.77818800  | 2.39251600  |
| H | -5.61783100 | -0.51805500 | -2.13531300 |
| H | -6.23393200 | -0.48263300 | 2.63504500  |
| H | -4.75448100 | -1.34502900 | 2.13014500  |
| H | -4.16224200 | 0.71501300  | 3.42872300  |
| H | -2.21169800 | 2.24946800  | -0.74809900 |
| H | -0.91144100 | 5.63787100  | 0.05315200  |
| H | 0.73968100  | 4.98108300  | 0.29572900  |
| H | 0.09405500  | 5.23432700  | -1.33749500 |
| H | -5.07716800 | 1.70464200  | 2.25936100  |
| C | 2.41524000  | -1.50472400 | -0.78109900 |
| C | 2.09414100  | -2.81334400 | -0.41191600 |
| C | 3.21989100  | -1.34423100 | -1.91693200 |
| C | 2.53088300  | -3.92436300 | -1.11363500 |
| C | 3.66521100  | -2.44386800 | -2.64429400 |
| H | 3.50854700  | -0.34446500 | -2.23278400 |
| C | 3.31840300  | -3.73305500 | -2.24490200 |
| H | 2.24197900  | -4.91497200 | -0.77243000 |
| H | 4.28938900  | -2.29094400 | -3.52116700 |
| H | 3.66327500  | -4.59545100 | -2.81066600 |
| C | 2.16751300  | -0.41154700 | 1.84932400  |
| C | 3.33965100  | -1.11125600 | 2.17388000  |
| C | 1.38740500  | 0.04726800  | 2.91141700  |
| C | 3.70151100  | -1.33823500 | 3.49610400  |
| H | 3.97322500  | -1.48080100 | 1.36812100  |
| C | 1.72381600  | -0.16915400 | 4.23966700  |
| C | 2.89061200  | -0.86798900 | 4.52886600  |
| H | 4.61527100  | -1.88259700 | 3.72073700  |
| H | 1.07285400  | 0.21074400  | 5.02217200  |
| H | 3.16576200  | -1.04382200 | 5.56619200  |
| C | 2.72878900  | 1.32459400  | -0.35526900 |
| C | 2.50911400  | 1.94449100  | -1.58688000 |
| C | 3.66213500  | 1.92285100  | 0.49936200  |
| C | 3.17019600  | 3.09088200  | -1.98943100 |
| C | 4.34107800  | 3.07914000  | 0.12241200  |
| H | 3.85286200  | 1.48089600  | 1.47535400  |
| C | 4.09593700  | 3.66156300  | -1.11879100 |
| H | 2.95350200  | 3.52162900  | -2.96317900 |

---

|   |             |             |             |
|---|-------------|-------------|-------------|
| H | 5.06251500  | 3.52463500  | 0.80288600  |
| H | 4.62309500  | 4.56533900  | -1.41544600 |
| P | 1.68324900  | -0.09710700 | 0.11875800  |
| F | 1.33371500  | -3.00918000 | 0.68438800  |
| F | 0.25633400  | 0.74019700  | 2.65473400  |
| F | 1.60370500  | 1.39461800  | -2.43211700 |
| C | -1.07123400 | -1.47938600 | -0.50860900 |
| C | -0.75555300 | -2.20581300 | -1.66197900 |
| C | -1.80911300 | -2.11134300 | 0.50069000  |
| C | -1.15896500 | -3.53620200 | -1.79867100 |
| H | -0.17647400 | -1.73979000 | -2.46232200 |
| C | -2.21103600 | -3.44083200 | 0.36424000  |
| H | -2.07616000 | -1.56030300 | 1.40458700  |
| C | -1.88633200 | -4.15915100 | -0.78645100 |
| H | -0.89540500 | -4.08763300 | -2.70166600 |
| H | -2.78352500 | -3.91494200 | 1.16220000  |
| H | -2.20068300 | -5.19617000 | -0.89400700 |

Post-TS<sub>PE</sub>(L7)

-----  
M06-L electronic energy (Hartree): -2703.288710

M06-L thermal correction to free energy (Hartree): 0.433671

Three lowest frequencies (cm<sup>-1</sup>): 14.68, 20.67, 26.02

-----

|    |            |             |             |
|----|------------|-------------|-------------|
| Pd | 0.64233800 | 0.27141800  | 0.17204100  |
| O  | 2.32630800 | -1.81982700 | -1.61095900 |
| O  | 0.99535800 | -1.99103700 | 0.19532700  |
| C  | 1.64577900 | -2.51600900 | -0.71028000 |
| C  | 1.73828500 | -3.98922700 | -0.90271000 |
| C  | 5.01574300 | 0.68552900  | 0.11070600  |
| C  | 3.75592000 | 0.10494900  | 0.45807700  |
| C  | 4.88442700 | 1.83299500  | -0.62262800 |
| C  | 2.64024900 | 0.77582200  | -0.00238500 |
| S  | 3.21023600 | 2.18479200  | -0.86566400 |
| O  | 6.21788700 | 0.13594400  | 0.46076100  |
| C  | 6.08219600 | -0.88231600 | 1.45681900  |
| O  | 3.68697000 | -1.05612300 | 1.19575300  |
| C  | 4.91459500 | -1.78549900 | 1.14743600  |
| H  | 5.67316900 | 2.46422700  | -1.01400900 |
| H  | 7.02504100 | -1.43562400 | 1.45410500  |
| H  | 5.94657700 | -0.41539100 | 2.44370400  |
| H  | 4.82480800 | -2.58380100 | 1.88847100  |
| H  | 2.29351200 | -0.86262000 | -1.33607700 |
| H  | 2.77286300 | -4.31711700 | -0.75344900 |

---

|   |             |             |             |
|---|-------------|-------------|-------------|
| H | 1.08626200  | -4.50844200 | -0.19948900 |
| H | 1.46185400  | -4.25233100 | -1.92884900 |
| H | 5.03828200  | -2.23762100 | 0.15005000  |
| C | -2.87282200 | 0.84378200  | -0.43799100 |
| C | -3.15385700 | 1.86584500  | 0.47072700  |
| C | -3.49192500 | 0.91156500  | -1.69058100 |
| C | -3.99881300 | 2.92249200  | 0.18276500  |
| C | -4.34356400 | 1.96701900  | -2.00881100 |
| H | -3.30785700 | 0.12866400  | -2.42387200 |
| C | -4.59278000 | 2.97139200  | -1.07614000 |
| H | -4.17465500 | 3.68829900  | 0.93354000  |
| H | -4.81549800 | 2.00075500  | -2.98789500 |
| H | -5.25441100 | 3.79826800  | -1.32423800 |
| C | -2.44143400 | -1.19081400 | 1.47924000  |
| C | -3.80591700 | -1.52038800 | 1.44228400  |
| C | -1.75442300 | -1.45567100 | 2.66340800  |
| C | -4.43773700 | -2.10218900 | 2.53390900  |
| H | -4.37233200 | -1.31217000 | 0.53430300  |
| C | -2.36296600 | -2.03403900 | 3.76875600  |
| C | -3.71249700 | -2.35979400 | 3.69740300  |
| H | -5.49440200 | -2.35179500 | 2.47940600  |
| H | -1.77567100 | -2.21558000 | 4.66480900  |
| H | -4.19940300 | -2.81344500 | 4.55775100  |
| C | -1.71929500 | -1.68498400 | -1.25466800 |
| C | -1.16951000 | -1.41843500 | -2.51172200 |
| C | -2.16222400 | -2.99506200 | -1.02751000 |
| C | -1.07241600 | -2.36425400 | -3.51804500 |
| C | -2.07377400 | -3.96791400 | -2.01961300 |
| H | -2.57297600 | -3.25817600 | -0.05505400 |
| C | -1.53447900 | -3.65305400 | -3.26459800 |
| H | -0.63862800 | -2.08479500 | -4.47443600 |
| H | -2.42623600 | -4.97606400 | -1.81530600 |
| H | -1.46155100 | -4.41075800 | -4.04128300 |
| P | -1.63248100 | -0.39962400 | 0.04550200  |
| F | -2.57547700 | 1.81319000  | 1.69138400  |
| F | -0.44804800 | -1.13389900 | 2.76547500  |
| F | -0.69882600 | -0.17190500 | -2.76150200 |
| C | 0.21727900  | 2.22310100  | 0.09353000  |
| C | -0.26301300 | 2.79568100  | -1.09073700 |
| C | 0.39407000  | 3.04705600  | 1.21197900  |
| C | -0.56709300 | 4.15721400  | -1.15242600 |
| H | -0.41643200 | 2.17607200  | -1.97436100 |
| C | 0.07962600  | 4.40535000  | 1.15166200  |
| H | 0.78003700  | 2.62944000  | 2.14232700  |

---

|   |             |            |             |
|---|-------------|------------|-------------|
| C | -0.39879100 | 4.96735500 | -0.03173700 |
| H | -0.94213200 | 4.58167600 | -2.08410100 |
| H | 0.21882600  | 5.02882100 | 2.03502600  |
| H | -0.63719200 | 6.02884600 | -0.07889600 |

Int<sub>PE</sub>(L8)

-----  
M06-L electronic energy (Hartree): -1922.393225

M06-L thermal correction to free energy (Hartree): 0.327949

Three lowest frequencies (cm<sup>-1</sup>): 18.47, 29.78, 34.83

-----

|    |             |             |             |
|----|-------------|-------------|-------------|
| Pd | -0.09589000 | 1.80470800  | 0.10256000  |
| O  | -0.43301900 | 3.98032100  | 0.19419100  |
| O  | -2.18148000 | 2.62251100  | 0.22621300  |
| C  | -1.69520100 | 3.79852600  | 0.24847900  |
| C  | -2.60808700 | 4.98496100  | 0.30803200  |
| H  | -2.86620000 | 5.29499600  | -0.71144700 |
| H  | -3.53902100 | 4.73715800  | 0.82458800  |
| H  | -2.12158700 | 5.83167000  | 0.79908500  |
| C  | 1.23511700  | -1.46041800 | -0.14402300 |
| C  | 2.04126000  | -1.35954400 | -1.28896000 |
| C  | 1.66194100  | -2.25783100 | 0.92206200  |
| C  | 3.24387700  | -2.04556600 | -1.37387100 |
| C  | 2.87049600  | -2.94502800 | 0.85462300  |
| H  | 1.05468000  | -2.34423100 | 1.82146600  |
| C  | 3.63977200  | -2.82449500 | -0.29219700 |
| H  | 3.21554900  | -3.56742800 | 1.67539400  |
| C  | -1.25785000 | -0.92304600 | -1.48096300 |
| C  | -1.09055900 | -2.16174900 | -2.11454500 |
| C  | -2.24542500 | -0.04223600 | -1.94668800 |
| C  | -1.88973700 | -2.51868800 | -3.19488400 |
| H  | -0.32826300 | -2.85689400 | -1.76596100 |
| C  | -3.05286900 | -0.38929200 | -3.02296400 |
| C  | -2.85760800 | -1.62349000 | -3.62914300 |
| H  | -1.76987600 | -3.47388000 | -3.69855300 |
| C  | -1.16465600 | -1.07029000 | 1.41138400  |
| C  | -1.05716800 | -0.39024800 | 2.63190900  |
| C  | -1.92887400 | -2.24294900 | 1.34625500  |
| C  | -1.68857900 | -0.87187600 | 3.77255600  |
| C  | -2.57049400 | -2.73319700 | 2.47688400  |
| H  | -2.02850300 | -2.77966700 | 0.40327600  |
| C  | -2.43548600 | -2.03720800 | 3.67177900  |
| H  | -3.17043000 | -3.63842000 | 2.44318300  |
| P  | -0.26164800 | -0.43450700 | -0.03687500 |

---

|   |             |             |             |
|---|-------------|-------------|-------------|
| H | -0.47463900 | 0.53052500  | 2.68640400  |
| H | -2.37935800 | 0.92535000  | -1.46121800 |
| H | 1.72752300  | -0.73193200 | -2.12308000 |
| H | -1.61467600 | -0.35661800 | 4.72608000  |
| H | 3.87620900  | -1.98101500 | -2.25501800 |
| H | -3.81932800 | 0.28312500  | -3.39867000 |
| F | -3.63076300 | -1.96167000 | -4.67478000 |
| F | 4.81059800  | -3.48158700 | -0.36350300 |
| F | -3.05616300 | -2.50583300 | 4.76703200  |
| C | 1.89085500  | 1.69937500  | 0.04575100  |
| C | 2.66013500  | 1.20598300  | 1.10502900  |
| C | 2.53272500  | 2.26693000  | -1.06001700 |
| C | 4.05253700  | 1.29520000  | 1.06468500  |
| H | 2.18034300  | 0.73592500  | 1.96520400  |
| C | 3.92711000  | 2.34420000  | -1.10060200 |
| H | 1.94932300  | 2.65346600  | -1.89668200 |
| C | 4.68940800  | 1.85885900  | -0.03999900 |
| H | 4.63984400  | 0.91222500  | 1.89903400  |
| H | 4.41529100  | 2.78746700  | -1.96824700 |
| H | 5.77587400  | 1.91706500  | -0.07486500 |

Pre-TS<sub>PE</sub>(L8)

-----  
M06-L electronic energy (Hartree): -2703.314348

M06-L thermal correction to free energy (Hartree): 0.433463

Three lowest frequencies (cm<sup>-1</sup>): 16.80, 27.26, 33.36  
-----

|    |             |             |             |
|----|-------------|-------------|-------------|
| Pd | 0.62603000  | -0.77654000 | 0.07721400  |
| O  | 0.05622500  | -3.52705800 | -1.12704000 |
| O  | -0.47144700 | -2.52205300 | 0.81722500  |
| C  | -0.56801700 | -3.47008500 | -0.05187800 |
| C  | -1.55587900 | -4.55765000 | 0.32184100  |
| C  | 4.45687200  | -0.81976400 | -0.30946900 |
| C  | 3.58857500  | -1.40675400 | 0.64541400  |
| C  | 4.11970900  | -1.16151300 | -1.59698500 |
| C  | 2.52533600  | -2.11008900 | 0.07559400  |
| S  | 2.73212700  | -2.16292500 | -1.66742700 |
| O  | 5.50255600  | -0.02199000 | 0.03130500  |
| C  | 5.41493800  | 0.40947500  | 1.39818200  |
| O  | 3.77101400  | -1.28694400 | 1.97427100  |
| C  | 5.06597500  | -0.73975200 | 2.30621800  |
| H  | 4.58076900  | -0.78628400 | -2.50331800 |
| H  | 6.39620300  | 0.81790400  | 1.64865600  |
| H  | 4.66009200  | 1.20395600  | 1.47438900  |

---

|   |             |             |             |
|---|-------------|-------------|-------------|
| H | 4.99255800  | -0.41682500 | 3.34613500  |
| H | 2.00894000  | -2.93326800 | 0.55920500  |
| H | -1.56309200 | -5.36618400 | -0.41417000 |
| H | -1.32748900 | -4.97006700 | 1.31098500  |
| H | -2.56262300 | -4.12620700 | 0.38551700  |
| H | 5.81046200  | -1.54209400 | 2.22830100  |
| C | -1.47249300 | 1.94762700  | -0.76332300 |
| C | -0.97327500 | 3.10206800  | -0.14222000 |
| C | -1.91933500 | 2.02875300  | -2.08702700 |
| C | -0.92710300 | 4.31235400  | -0.82007000 |
| C | -1.87591200 | 3.23408000  | -2.78055100 |
| H | -2.30866000 | 1.14443800  | -2.58952200 |
| C | -1.37680000 | 4.35468400  | -2.13371000 |
| H | -2.22626900 | 3.31135600  | -3.80624500 |
| C | -1.90631500 | 0.71709800  | 1.79590100  |
| C | -2.93744400 | 1.63277800  | 2.05432600  |
| C | -1.28603200 | 0.06637100  | 2.87068800  |
| C | -3.34922400 | 1.88811400  | 3.35630900  |
| H | -3.42144100 | 2.15872000  | 1.23197500  |
| C | -1.68711100 | 0.31289200  | 4.17895100  |
| C | -2.71409000 | 1.22093400  | 4.39619800  |
| H | -4.14546000 | 2.59486200  | 3.57245100  |
| C | -2.63508800 | -0.69830800 | -0.65624600 |
| C | -2.29103400 | -1.42930700 | -1.80236300 |
| C | -3.93125600 | -0.80975700 | -0.14051600 |
| C | -3.22332900 | -2.24109000 | -2.43660500 |
| C | -4.87300800 | -1.62533500 | -0.75957800 |
| H | -4.21552800 | -0.26442800 | 0.75769800  |
| C | -4.50144600 | -2.32353200 | -1.90003000 |
| H | -5.88127400 | -1.72663500 | -0.36713100 |
| P | -1.35172000 | 0.35065200  | 0.10314000  |
| H | -1.27105500 | -1.38250000 | -2.18641400 |
| H | -0.47985600 | -0.64092800 | 2.67417200  |
| H | -0.61215100 | 3.05724300  | 0.88443600  |
| H | -2.96788700 | -2.81642300 | -3.32239300 |
| H | -0.54182000 | 5.21310300  | -0.34957400 |
| H | -1.21228000 | -0.18063200 | 5.02245100  |
| F | -3.10525300 | 1.46994600  | 5.65743200  |
| F | -1.33173000 | 5.52455900  | -2.79675700 |
| F | -5.40771600 | -3.11482700 | -2.50091300 |
| C | 1.58963000  | 0.89746200  | -0.46074500 |
| C | 2.17569100  | 1.71857300  | 0.50927200  |
| C | 1.73320700  | 1.24549600  | -1.80903300 |
| C | 2.91888200  | 2.84273100  | 0.13848200  |

---

|   |            |            |             |
|---|------------|------------|-------------|
| H | 2.06473100 | 1.47705700 | 1.56977100  |
| C | 2.47727400 | 2.36712400 | -2.18006100 |
| H | 1.26434900 | 0.63393200 | -2.58288900 |
| C | 3.07787200 | 3.16631900 | -1.20775900 |
| H | 3.37779500 | 3.46359500 | 0.90882400  |
| H | 2.58461800 | 2.61820600 | -3.23560400 |
| H | 3.65765700 | 4.04124100 | -1.49700100 |

TS<sub>PE</sub>(L8)

-----  
M06-L electronic energy (Hartree): -2703.285450

M06-L thermal correction to free energy (Hartree): 0.424409

Three lowest frequencies (cm<sup>-1</sup>): -516.68, 8.67, 17.51

-----

|    |             |             |             |
|----|-------------|-------------|-------------|
| Pd | 0.70427600  | -0.53359400 | -0.39909500 |
| O  | 2.06832100  | -3.52857300 | -0.59173800 |
| O  | 0.00354800  | -2.66232800 | -0.38055200 |
| C  | 0.79126800  | -3.63412000 | -0.43970400 |
| C  | 0.25507400  | -5.02725700 | -0.30025000 |
| C  | 4.95179600  | -0.14284400 | -0.38165200 |
| C  | 3.74596900  | -0.68469700 | 0.14397400  |
| C  | 4.92599800  | -0.04862800 | -1.74990700 |
| C  | 2.76532500  | -1.01129000 | -0.78657400 |
| S  | 3.42299600  | -0.61493100 | -2.36575200 |
| O  | 6.00418800  | 0.23611100  | 0.40061900  |
| C  | 5.58577700  | 0.43827000  | 1.75587000  |
| O  | 3.55736300  | -0.86521400 | 1.48149600  |
| C  | 4.77024700  | -0.73251500 | 2.24050200  |
| H  | 5.72295800  | 0.30020800  | -2.39670400 |
| H  | 6.49970000  | 0.54999000  | 2.34357400  |
| H  | 5.00003800  | 1.36776800  | 1.82080100  |
| H  | 4.46074700  | -0.59803700 | 3.27952900  |
| H  | 2.34977200  | -2.40096700 | -0.67931800 |
| H  | 0.95110900  | -5.76819700 | -0.69855300 |
| H  | 0.09766400  | -5.24135100 | 0.76336100  |
| H  | -0.71499800 | -5.11368900 | -0.79602000 |
| H  | 5.34964300  | -1.66233200 | 2.15678700  |
| C  | -1.96488200 | 1.82402000  | -0.02242900 |
| C  | -1.43993800 | 2.72502000  | 0.91658200  |
| C  | -2.72683300 | 2.31933300  | -1.08515200 |
| C  | -1.67450800 | 4.08788300  | 0.80634500  |
| C  | -2.96877500 | 3.68492700  | -1.21099500 |
| H  | -3.13911900 | 1.63844100  | -1.82831700 |
| C  | -2.43586800 | 4.54436900  | -0.26218500 |

---

|   |             |             |             |
|---|-------------|-------------|-------------|
| H | -3.56283700 | 4.08258800  | -2.02964100 |
| C | -1.97864900 | -0.38424300 | 1.80121200  |
| C | -3.03768400 | 0.25222800  | 2.46458700  |
| C | -1.28324600 | -1.40924500 | 2.45810200  |
| C | -3.40566300 | -0.12863900 | 3.74959400  |
| H | -3.57857600 | 1.06172200  | 1.97596300  |
| C | -1.64302900 | -1.80409000 | 3.74176000  |
| C | -2.70073900 | -1.15486700 | 4.36394900  |
| H | -4.22229300 | 0.35854300  | 4.27529000  |
| C | -2.66873600 | -0.78990100 | -0.99272000 |
| C | -2.24825400 | -1.11176500 | -2.28998100 |
| C | -3.97773500 | -1.10034200 | -0.60507600 |
| C | -3.11420500 | -1.71987500 | -3.19135800 |
| C | -4.85372100 | -1.71632800 | -1.49165300 |
| H | -4.32206400 | -0.86580000 | 0.40156100  |
| C | -4.40480900 | -2.01234300 | -2.77161300 |
| H | -5.87079000 | -1.96833500 | -1.20416400 |
| P | -1.49175700 | 0.06977000  | 0.10336800  |
| H | -1.22329200 | -0.88747700 | -2.59138600 |
| H | -0.45051400 | -1.90219100 | 1.95558300  |
| H | -0.83208900 | 2.35753800  | 1.74280400  |
| H | -2.80104200 | -1.97669600 | -4.19965600 |
| H | -1.26817800 | 4.79487300  | 1.52458700  |
| H | -1.11231500 | -2.59593200 | 4.26342000  |
| F | -3.04966400 | -1.52709200 | 5.60770100  |
| F | -2.66176100 | 5.86639400  | -0.37957500 |
| F | -5.24724200 | -2.61169900 | -3.63145900 |
| C | 1.27726100  | 1.38679100  | -0.42427800 |
| C | 1.94875200  | 1.96373100  | 0.65969200  |
| C | 0.98213800  | 2.19093400  | -1.53237800 |
| C | 2.30001900  | 3.31602900  | 0.64278700  |
| H | 2.20361300  | 1.35715500  | 1.52978300  |
| C | 1.33638800  | 3.54095700  | -1.55006400 |
| H | 0.44723300  | 1.76848600  | -2.38572900 |
| C | 1.99427600  | 4.11020600  | -0.46068200 |
| H | 2.81909100  | 3.74697800  | 1.49976700  |
| H | 1.08498400  | 4.15110600  | -2.41797800 |
| H | 2.26583200  | 5.16461000  | -0.47186900 |

Post-TS<sub>PE</sub>(L8)

-----  
M06-L electronic energy (Hartree): -2703.292602

M06-L thermal correction to free energy (Hartree): 0.427277

Three lowest frequencies (cm<sup>-1</sup>): 12.23, 16.68, 25.65

---

-----

|    |             |             |             |
|----|-------------|-------------|-------------|
| Pd | 0.78823600  | 0.34214200  | 0.05624800  |
| O  | 2.64849900  | -1.68428200 | -1.66580800 |
| O  | 1.25173100  | -1.88577400 | 0.08754500  |
| C  | 1.95534000  | -2.39413900 | -0.78765000 |
| C  | 2.11107700  | -3.86555600 | -0.94713100 |
| C  | 5.14669500  | 0.99089300  | 0.10086900  |
| C  | 3.91473900  | 0.31722900  | 0.36905100  |
| C  | 4.96547700  | 2.17448700  | -0.56163700 |
| C  | 2.77189400  | 0.94666500  | -0.08581100 |
| S  | 3.28008100  | 2.44196100  | -0.83390300 |
| O  | 6.36967500  | 0.49023300  | 0.45138600  |
| C  | 6.26969900  | -0.61007200 | 1.36167600  |
| O  | 3.89546900  | -0.89276900 | 1.02864500  |
| C  | 5.16268000  | -1.54875200 | 0.95360100  |
| H  | 5.72482200  | 2.87464400  | -0.88816600 |
| H  | 7.24256100  | -1.10814600 | 1.34119800  |
| H  | 6.08584500  | -0.23038600 | 2.37767700  |
| H  | 5.10387500  | -2.40684700 | 1.62816400  |
| H  | 2.57788100  | -0.72603900 | -1.40203700 |
| H  | 2.22130500  | -4.13794500 | -1.99960800 |
| H  | 3.02082600  | -4.18669200 | -0.42589400 |
| H  | 1.25931300  | -4.38597700 | -0.50554200 |
| H  | 5.32929000  | -1.91291200 | -0.07297700 |
| C  | -2.74248300 | 0.83790700  | -0.43660500 |
| C  | -3.09538400 | 1.86215500  | 0.45481100  |
| C  | -3.28048600 | 0.84764000  | -1.72771400 |
| C  | -3.97274600 | 2.86833500  | 0.07351600  |
| C  | -4.15688300 | 1.85307000  | -2.12656200 |
| H  | -3.02007300 | 0.06317100  | -2.43655000 |
| C  | -4.48562900 | 2.84696400  | -1.21707900 |
| H  | -4.58552300 | 1.86877600  | -3.12484800 |
| C  | -2.03766800 | -0.95341700 | 1.69340100  |
| C  | -3.39690300 | -1.09192100 | 2.00986200  |
| C  | -1.07621700 | -1.29367700 | 2.65462000  |
| C  | -3.79123000 | -1.56671100 | 3.25502800  |
| H  | -4.15726000 | -0.82065400 | 1.27817600  |
| C  | -1.45490900 | -1.77287900 | 3.90394400  |
| C  | -2.80924100 | -1.90037900 | 4.17941700  |
| H  | -4.83990800 | -1.67807200 | 3.51626500  |
| C  | -1.65391800 | -1.76906400 | -1.07140900 |
| C  | -0.96074500 | -1.71363800 | -2.29038700 |
| C  | -2.40111600 | -2.91223100 | -0.76896800 |
| C  | -1.01937300 | -2.76501600 | -3.19688300 |

---

|   |             |             |             |
|---|-------------|-------------|-------------|
| C | -2.46344300 | -3.97806500 | -1.66209100 |
| H | -2.93599600 | -2.98339000 | 0.17669500  |
| C | -1.77160000 | -3.88373000 | -2.86107200 |
| H | -3.03565800 | -4.87392500 | -1.43731900 |
| P | -1.46696500 | -0.35787700 | 0.07154500  |
| H | -0.35434100 | -0.83614900 | -2.52625100 |
| H | -0.01777500 | -1.17650000 | 2.41882800  |
| H | -2.67415700 | 1.87962200  | 1.45934500  |
| H | -0.48530800 | -2.73324400 | -4.14259700 |
| H | -4.25165800 | 3.66740500  | 0.75521400  |
| H | -0.72107800 | -2.03727000 | 4.66014000  |
| F | -3.18594200 | -2.35640200 | 5.38649200  |
| F | -5.33237500 | 3.82306900  | -1.59580400 |
| F | -1.82436600 | -4.91306600 | -3.72488300 |
| C | 0.23635100  | 2.26037100  | 0.04653600  |
| C | 0.13248000  | 2.98203400  | 1.24150100  |
| C | -0.09566500 | 2.89767800  | -1.15544100 |
| C | -0.29967300 | 4.31022100  | 1.23365000  |
| H | 0.38745700  | 2.50807500  | 2.19066200  |
| C | -0.52386100 | 4.22622000  | -1.16148400 |
| H | -0.02830900 | 2.35342400  | -2.09940800 |
| C | -0.62740300 | 4.93760100  | 0.03293400  |
| H | -0.37651600 | 4.85607300  | 2.17405800  |
| H | -0.78056800 | 4.70465700  | -2.10681400 |
| H | -0.96269500 | 5.97352500  | 0.02812200  |

Int<sub>PE</sub>(L9)

-----

M06-L electronic energy (Hartree): -1922.391059

M06-L thermal correction to free energy (Hartree): 0.327321

Three lowest frequencies (cm<sup>-1</sup>): 18.80, 26.95, 31.10

-----

|    |             |             |             |
|----|-------------|-------------|-------------|
| Pd | -0.40352700 | 1.60030300  | -0.02240000 |
| O  | -1.09336500 | 3.68330100  | -0.13727800 |
| O  | -2.59939300 | 2.06076500  | -0.14682200 |
| C  | -2.31038900 | 3.29929600  | -0.18237400 |
| C  | -3.40118400 | 4.32400400  | -0.24551300 |
| H  | -3.64915900 | 4.65135100  | 0.77112300  |
| H  | -3.07818600 | 5.20642700  | -0.80430000 |
| H  | -4.30716600 | 3.90824500  | -0.69358400 |
| C  | 1.50396300  | -1.35992500 | 0.20083500  |
| C  | 2.43895300  | -1.11757500 | -0.81338800 |
| C  | 1.89294600  | -2.04125200 | 1.35757700  |
| C  | 3.73983500  | -1.55357500 | -0.63898800 |

---

|   |             |             |             |
|---|-------------|-------------|-------------|
| C | 3.21054400  | -2.47649000 | 1.49890400  |
| H | 1.17449400  | -2.22850900 | 2.15287400  |
| C | 4.14873600  | -2.23395600 | 0.50202500  |
| H | 3.50944800  | -3.00933800 | 2.39869600  |
| H | 5.18211200  | -2.55628200 | 0.59654400  |
| C | -0.83304600 | -1.39926200 | -1.49636900 |
| C | -0.31759800 | -2.58585400 | -2.03078700 |
| C | -1.93798000 | -0.78265800 | -2.09610800 |
| C | -0.90513700 | -3.15134100 | -3.16054200 |
| H | 0.53962800  | -3.06873500 | -1.56560900 |
| C | -2.50250600 | -1.37532000 | -3.21427300 |
| C | -2.00537200 | -2.55000800 | -3.76362700 |
| H | -0.50322800 | -4.07280800 | -3.57547700 |
| H | -2.47644800 | -2.97516200 | -4.64579100 |
| C | -1.13667300 | -1.36077100 | 1.37261900  |
| C | -1.35912500 | -0.59448800 | 2.52115600  |
| C | -1.62965900 | -2.66911400 | 1.29835200  |
| C | -2.06352700 | -1.16022800 | 3.57374000  |
| C | -2.33649500 | -3.20654000 | 2.37060600  |
| H | -1.46056600 | -3.26729800 | 0.40428600  |
| C | -2.56033100 | -2.45474200 | 3.52129800  |
| H | -2.72016200 | -4.22249600 | 2.31194800  |
| H | -3.11311300 | -2.85505700 | 4.36685900  |
| P | -0.15470300 | -0.63515200 | 0.01578300  |
| H | -0.99676700 | 0.43040300  | 2.59522400  |
| H | -2.35107000 | 0.14615200  | -1.70256400 |
| H | 2.17317900  | -0.57067400 | -1.71588100 |
| F | 4.64341900  | -1.29593000 | -1.60322700 |
| F | -3.56585900 | -0.78613900 | -3.79184600 |
| F | -2.27455900 | -0.42263400 | 4.67898900  |
| C | 1.57239700  | 1.82599300  | 0.07872600  |
| C | 2.28667200  | 1.63014000  | 1.26479700  |
| C | 2.24383800  | 2.27845400  | -1.06150100 |
| C | 3.65765100  | 1.88903800  | 1.30898100  |
| H | 1.78414600  | 1.25486300  | 2.15775000  |
| C | 3.61791300  | 2.52657400  | -1.01396000 |
| H | 1.70299700  | 2.43006300  | -1.99655200 |
| C | 4.32761000  | 2.32964300  | 0.16872300  |
| H | 4.20375800  | 1.73190600  | 2.23900300  |
| H | 4.13234100  | 2.87205700  | -1.91040200 |
| H | 5.39941700  | 2.51776400  | 0.20158400  |

Pre-TS<sub>PE</sub>(L9)

-----

---

M06-L electronic energy (Hartree): -2703.313009

M06-L thermal correction to free energy (Hartree): 0.433247

Three lowest frequencies (cm<sup>-1</sup>): 15.32, 26.30, 29.55

-----

|    |             |             |             |
|----|-------------|-------------|-------------|
| Pd | 0.45588600  | -0.78543300 | 0.00376600  |
| O  | -0.25086600 | -3.53685600 | -1.11834600 |
| O  | -0.69435500 | -2.46403500 | 0.81013700  |
| C  | -0.83122000 | -3.44046400 | -0.02093500 |
| C  | -1.81012400 | -4.50844800 | 0.42574900  |
| C  | 4.26879000  | -0.97989500 | -0.40792400 |
| C  | 3.38460500  | -1.52011700 | 0.55935400  |
| C  | 3.91287000  | -1.32931700 | -1.68857600 |
| C  | 2.29318100  | -2.19344300 | 0.00534000  |
| S  | 2.49062400  | -2.28172000 | -1.73746600 |
| O  | 5.34232400  | -0.21299100 | -0.08457500 |
| C  | 5.27871000  | 0.24152600  | 1.27648800  |
| O  | 3.57603500  | -1.38581100 | 1.88487600  |
| C  | 4.89103700  | -0.87962600 | 2.20384700  |
| H  | 4.38279100  | -0.98520600 | -2.60269300 |
| H  | 6.27687600  | 0.61403200  | 1.51609200  |
| H  | 4.55739800  | 1.06757500  | 1.34449600  |
| H  | 4.83268800  | -0.53763000 | 3.23856400  |
| H  | 1.75572300  | -2.99313400 | 0.50527200  |
| H  | -1.87877300 | -5.32177300 | -0.30198500 |
| H  | -1.51993900 | -4.91939300 | 1.39929200  |
| H  | -2.80411100 | -4.06228000 | 0.55744600  |
| H  | 5.60555400  | -1.70967400 | 2.13708500  |
| C  | -1.50971800 | 2.00849200  | -0.90755800 |
| C  | -0.84517800 | 3.15978300  | -0.46688700 |
| C  | -2.09457600 | 1.99072400  | -2.17817300 |
| C  | -0.78321000 | 4.25791400  | -1.30767700 |
| C  | -2.01509300 | 3.11297900  | -3.00043400 |
| H  | -2.61228500 | 1.10073300  | -2.53062500 |
| C  | -1.35395300 | 4.26012100  | -2.57348700 |
| H  | -2.47448300 | 3.09418100  | -3.98623200 |
| H  | -1.27858600 | 5.14511700  | -3.19914600 |
| C  | -1.79632700 | 1.02669400  | 1.80191300  |
| C  | -2.60484000 | 2.13507600  | 2.08577900  |
| C  | -1.27571600 | 0.25753100  | 2.84883600  |
| C  | -2.88947300 | 2.46823500  | 3.40813300  |
| H  | -3.00933800 | 2.73841100  | 1.27500600  |
| C  | -1.58272500 | 0.61226800  | 4.15320300  |
| C  | -2.38007000 | 1.70744200  | 4.45659200  |
| H  | -3.51490600 | 3.33052300  | 3.62716800  |

---

|   |             |             |             |
|---|-------------|-------------|-------------|
| H | -2.58901200 | 1.95255000  | 5.49435200  |
| C | -2.87129600 | -0.49158100 | -0.42913800 |
| C | -2.67565000 | -1.41491600 | -1.46131000 |
| C | -4.13382600 | -0.35655300 | 0.15680700  |
| C | -3.74801400 | -2.18508800 | -1.88058000 |
| C | -5.19386700 | -1.14297400 | -0.29055800 |
| H | -4.29061000 | 0.35323000  | 0.96705000  |
| C | -5.01070200 | -2.06798200 | -1.31488600 |
| H | -6.17485000 | -1.03925300 | 0.16754600  |
| H | -5.82250900 | -2.69856800 | -1.66745600 |
| P | -1.42698100 | 0.49223500  | 0.09922200  |
| H | -1.69021200 | -1.57042900 | -1.89909900 |
| H | -0.64215100 | -0.60590000 | 2.64950200  |
| H | -0.35935600 | 3.20391300  | 0.50565700  |
| F | -0.13689600 | 5.36046000  | -0.88196100 |
| F | -1.08027600 | -0.12680500 | 5.15987900  |
| F | -3.54726600 | -3.09450700 | -2.85360900 |
| C | 1.48522300  | 0.83591300  | -0.57479700 |
| C | 2.10324200  | 1.65276800  | 0.37847800  |
| C | 1.61821800  | 1.16251000  | -1.92906800 |
| C | 2.85958000  | 2.76013100  | -0.01524700 |
| H | 1.99971400  | 1.42652600  | 1.44307900  |
| C | 2.37640100  | 2.26659200  | -2.32227500 |
| H | 1.12583000  | 0.55226300  | -2.68879100 |
| C | 3.00084400  | 3.06786600  | -1.36691200 |
| H | 3.33999400  | 3.38129200  | 0.74150300  |
| H | 2.47284200  | 2.50502500  | -3.38175300 |
| H | 3.58778000  | 3.93200900  | -1.67352200 |

TS<sub>PE</sub>(L9)

-----

M06-L electronic energy (Hartree): -2703.284159

M06-L thermal correction to free energy (Hartree): 0.425760

Three lowest frequencies (cm<sup>-1</sup>): -496.34, 10.95, 19.10

-----

|    |             |             |             |
|----|-------------|-------------|-------------|
| Pd | 0.49442800  | -0.61546500 | -0.39173800 |
| O  | 1.78780400  | -3.64674100 | -0.32520200 |
| O  | -0.22231500 | -2.69329600 | 0.00958200  |
| C  | 0.53163400  | -3.69144800 | -0.02832100 |
| C  | -0.00672900 | -5.05217100 | 0.29702900  |
| C  | 4.71456100  | -0.26639100 | -0.52500800 |
| C  | 3.51897600  | -0.74958900 | 0.07400900  |
| C  | 4.66765800  | -0.32437700 | -1.89503400 |
| C  | 2.52701100  | -1.17981800 | -0.80085000 |

---

|   |             |             |             |
|---|-------------|-------------|-------------|
| S | 3.15705100  | -0.95640500 | -2.42295800 |
| O | 5.77851800  | 0.19551100  | 0.19432500  |
| C | 5.39189400  | 0.52440600  | 1.53455800  |
| O | 3.34766600  | -0.77611900 | 1.42536000  |
| C | 4.57623000  | -0.58702200 | 2.14422600  |
| H | 5.45531800  | -0.05158700 | -2.58840800 |
| H | 6.32044300  | 0.68038600  | 2.08875900  |
| H | 4.81552300  | 1.46191700  | 1.52746200  |
| H | 4.29013000  | -0.35029400 | 3.17150900  |
| H | 2.08960800  | -2.54524000 | -0.54133400 |
| H | 0.31490500  | -5.77983300 | -0.45378200 |
| H | 0.39926300  | -5.38450400 | 1.25897400  |
| H | -1.09628200 | -5.03646200 | 0.35934900  |
| H | 5.14512800  | -1.52721400 | 2.13864500  |
| C | -2.12784800 | 1.79125000  | -0.49441200 |
| C | -1.59139300 | 2.93213400  | 0.11505300  |
| C | -2.89020500 | 1.92432200  | -1.65964200 |
| C | -1.82064900 | 4.16923700  | -0.46188800 |
| C | -3.10987300 | 3.18533100  | -2.21144400 |
| H | -3.31344500 | 1.04435800  | -2.14060700 |
| C | -2.57275800 | 4.32367800  | -1.61868800 |
| H | -3.70763500 | 3.28208300  | -3.11510300 |
| H | -2.72476900 | 5.31465800  | -2.03719800 |
| C | -1.87645900 | 0.29169800  | 1.94595900  |
| C | -2.90916900 | 1.05566600  | 2.50696300  |
| C | -0.99385700 | -0.40107300 | 2.78220800  |
| C | -3.06107000 | 1.11604800  | 3.88945400  |
| H | -3.58849100 | 1.61074700  | 1.86180000  |
| C | -1.17039200 | -0.31974800 | 4.15533500  |
| C | -2.18974300 | 0.42648500  | 4.72892500  |
| H | -3.86378200 | 1.70910000  | 4.32175000  |
| H | -2.28664500 | 0.46647700  | 5.81026200  |
| C | -2.93601600 | -0.98123200 | -0.45399700 |
| C | -2.71626800 | -1.59700600 | -1.69194700 |
| C | -4.10670400 | -1.25757500 | 0.25920500  |
| C | -3.67715600 | -2.46081400 | -2.19161100 |
| C | -5.05064000 | -2.13877900 | -0.26541900 |
| H | -4.28090300 | -0.79509000 | 1.22874300  |
| C | -4.84576600 | -2.74845500 | -1.49982900 |
| H | -5.95719000 | -2.35657200 | 0.29492100  |
| H | -5.56750700 | -3.44222600 | -1.92236100 |
| P | -1.63444600 | 0.15442700  | 0.14269600  |
| H | -1.79725800 | -1.42404900 | -2.25193900 |
| H | -0.17363800 | -0.99052200 | 2.37156000  |

---

|   |             |             |             |
|---|-------------|-------------|-------------|
| H | -0.97098200 | 2.86796300  | 1.00659700  |
| F | -1.28245600 | 5.26095500  | 0.11650900  |
| F | -0.31519700 | -0.98076700 | 4.95813700  |
| F | -3.45962500 | -3.05358800 | -3.38116700 |
| C | 1.12635500  | 1.26473800  | -0.67146900 |
| C | 1.72661600  | 1.97214300  | 0.37665600  |
| C | 0.95930000  | 1.90556200  | -1.90503700 |
| C | 2.13407900  | 3.29668600  | 0.20036000  |
| H | 1.88498900  | 1.48780100  | 1.34215100  |
| C | 1.36979500  | 3.22807600  | -2.08092800 |
| H | 0.48863700  | 1.37777800  | -2.73662800 |
| C | 1.95429600  | 3.93068000  | -1.02777800 |
| H | 2.59790900  | 3.83141800  | 1.02977100  |
| H | 1.22623200  | 3.71180600  | -3.04749000 |
| H | 2.26847600  | 4.96448800  | -1.16421200 |

Post-TS<sub>PE</sub>(L9)

-----  
M06-L electronic energy (Hartree): -2703.291699

M06-L thermal correction to free energy (Hartree): 0.431892

Three lowest frequencies (cm<sup>-1</sup>): 9.03, 15.46, 27.70  
-----

|    |            |             |             |
|----|------------|-------------|-------------|
| Pd | 0.65324700 | 0.32044600  | -0.02988100 |
| O  | 2.67929500 | -1.68539700 | -1.57502300 |
| O  | 1.28619500 | -1.84546400 | 0.18492700  |
| C  | 2.03588500 | -2.37005900 | -0.64123200 |
| C  | 2.30502100 | -3.83281400 | -0.67393800 |
| C  | 4.93294900 | 1.33319000  | 0.01486300  |
| C  | 3.75513500 | 0.58297700  | 0.32159800  |
| C  | 4.67388600 | 2.42213200  | -0.77191500 |
| C  | 2.57911800 | 1.06394000  | -0.22116600 |
| S  | 2.98120500 | 2.51394800  | -1.10908300 |
| O  | 6.18066500 | 0.98090000  | 0.44868500  |
| C  | 6.13882800 | -0.01330400 | 1.47823000  |
| O  | 3.81523200 | -0.55201100 | 1.10043300  |
| C  | 5.13790700 | -1.09083400 | 1.14753900  |
| H  | 5.38185600 | 3.14766900  | -1.15371700 |
| H  | 7.15163300 | -0.41852700 | 1.54782900  |
| H  | 5.87906000 | 0.46141900  | 2.43595600  |
| H  | 5.12456900 | -1.86610700 | 1.91788600  |
| H  | 2.52672500 | -0.71699900 | -1.39611100 |
| H  | 2.42815700 | -4.18677700 | -1.70076400 |
| H  | 3.24159600 | -4.03594500 | -0.14072200 |
| H  | 1.49850400 | -4.37520800 | -0.17732400 |

---

|   |             |             |             |
|---|-------------|-------------|-------------|
| H | 5.38373900  | -1.55493200 | 0.17904800  |
| C | -2.90408700 | 0.48855100  | -0.56974800 |
| C | -3.29563900 | 1.59238300  | 0.19778100  |
| C | -3.45204300 | 0.30113900  | -1.84264100 |
| C | -4.21434800 | 2.48234800  | -0.33052000 |
| C | -4.38176600 | 1.21145100  | -2.34342900 |
| H | -3.15769900 | -0.55589700 | -2.44521700 |
| C | -4.77080900 | 2.31599500  | -1.59217900 |
| H | -4.81003100 | 1.05790400  | -3.33150500 |
| H | -5.48882500 | 3.04013000  | -1.96737600 |
| C | -2.08539800 | -0.98380200 | 1.75670300  |
| C | -3.42822500 | -1.21403800 | 2.08485300  |
| C | -1.10041100 | -1.08846500 | 2.74500600  |
| C | -3.77811600 | -1.55491100 | 3.38851700  |
| H | -4.19908300 | -1.12017600 | 1.32142600  |
| C | -1.48076400 | -1.42869300 | 4.03468600  |
| C | -2.80379500 | -1.66602600 | 4.37820200  |
| H | -4.82061200 | -1.73451800 | 3.64139000  |
| H | -3.05779800 | -1.92319400 | 5.40283700  |
| C | -1.62830700 | -2.09617300 | -0.89746100 |
| C | -0.93983000 | -2.10623600 | -2.11788900 |
| C | -2.27344800 | -3.25589900 | -0.45881200 |
| C | -0.92493700 | -3.26807800 | -2.87227100 |
| C | -2.23429400 | -4.41277900 | -1.23716200 |
| H | -2.80190700 | -3.26257700 | 0.49249100  |
| C | -1.55845600 | -4.43065700 | -2.45290500 |
| H | -2.73452700 | -5.31425800 | -0.89013300 |
| H | -1.51277700 | -5.32398500 | -3.06952400 |
| P | -1.54719800 | -0.54762900 | 0.07015200  |
| H | -0.40326400 | -1.22440800 | -2.47105800 |
| H | -0.05177300 | -0.89753500 | 2.51684900  |
| H | -2.87603700 | 1.78033400  | 1.18411900  |
| F | -4.57426500 | 3.55205400  | 0.40471300  |
| F | -0.53308100 | -1.51796100 | 4.98660900  |
| F | -0.25815200 | -3.27357200 | -4.04193300 |
| C | -0.04458500 | 2.18283600  | -0.19450200 |
| C | -0.20467300 | 2.98546000  | 0.94105300  |
| C | -0.45592100 | 2.68252800  | -1.43610800 |
| C | -0.78423300 | 4.25237400  | 0.83866100  |
| H | 0.11599200  | 2.62134300  | 1.91842200  |
| C | -1.03035000 | 3.95099400  | -1.53685000 |
| H | -0.34377700 | 2.07337200  | -2.33508300 |
| C | -1.20102000 | 4.73851200  | -0.39940700 |
| H | -0.90820900 | 4.86104400  | 1.73446000  |

---

|   |             |            |             |
|---|-------------|------------|-------------|
| H | -1.35158800 | 4.32067200 | -2.51088700 |
| H | -1.65586500 | 5.72471800 | -0.47775500 |

Int<sub>PE</sub>(L10)

-----  
M06-L electronic energy (Hartree): -3647.248736

M06-L thermal correction to free energy (Hartree): 0.355628

Three lowest frequencies (cm<sup>-1</sup>): 7.89, 22.08, 23.60

-----

|    |             |             |             |
|----|-------------|-------------|-------------|
| Pd | -0.45788800 | -1.05709200 | -2.37866000 |
| O  | -0.98198500 | -2.01047300 | -4.28022800 |
| O  | -2.41623800 | -2.12045500 | -2.60112100 |
| C  | -2.10380900 | -2.39296600 | -3.80396000 |
| C  | -3.06183800 | -3.13477700 | -4.68253600 |
| H  | -3.72543400 | -3.77006100 | -4.09078300 |
| H  | -3.68461400 | -2.41432300 | -5.22589300 |
| H  | -2.52967400 | -3.73571500 | -5.42468300 |
| C  | 0.51775200  | 1.47043600  | -0.16574100 |
| C  | 1.90408900  | 1.64590700  | -0.28660700 |
| C  | -0.30568300 | 2.58802300  | -0.05087500 |
| C  | 2.44481200  | 2.92292400  | -0.28962600 |
| H  | 2.56293700  | 0.78559900  | -0.39285900 |
| C  | 0.25017000  | 3.86916700  | -0.05550800 |
| H  | -1.38481200 | 2.47508000  | 0.04538300  |
| C  | 1.62065800  | 4.04365400  | -0.17837300 |
| H  | 2.04782800  | 5.04329300  | -0.18405000 |
| C  | 0.89285700  | -1.23454600 | 0.72893000  |
| C  | 1.53598300  | -0.74486100 | 1.86850700  |
| C  | 1.07951500  | -2.56837300 | 0.36088200  |
| C  | 2.34312500  | -1.58741900 | 2.62944700  |
| H  | 1.42465300  | 0.29779600  | 2.16543100  |
| C  | 1.89890600  | -3.39907200 | 1.11949900  |
| H  | 0.59398700  | -2.94942800 | -0.53956600 |
| C  | 2.53265600  | -2.91523700 | 2.25940300  |
| H  | 3.17474100  | -3.56215700 | 2.84919200  |
| C  | -1.78542200 | -0.10197600 | 0.55836900  |
| C  | -2.95089100 | -0.05983100 | -0.20908100 |
| C  | -1.87711100 | -0.03932400 | 1.95122400  |
| C  | -4.19326900 | 0.04859900  | 0.41124600  |
| H  | -2.88824700 | -0.12730300 | -1.29490600 |
| C  | -3.12428200 | 0.06690400  | 2.56060300  |
| H  | -0.98249500 | -0.07074900 | 2.57201600  |
| C  | -4.28769400 | 0.11103700  | 1.79636500  |
| H  | -5.25653000 | 0.19470900  | 2.27908300  |

---

|   |             |             |             |
|---|-------------|-------------|-------------|
| P | -0.18689800 | -0.20576300 | -0.32152300 |
| C | 2.08119500  | -4.81572900 | 0.66550000  |
| C | 3.02877600  | -1.01224000 | 3.83246200  |
| C | -3.18477300 | 0.11242200  | 4.05832500  |
| C | -5.41578600 | 0.09205500  | -0.45486600 |
| C | -0.67105900 | 5.04521400  | 0.06234800  |
| C | 3.92215400  | 3.13713100  | -0.42905000 |
| F | 4.21089000  | 3.85117700  | -1.53879800 |
| F | 4.41428100  | 3.83629400  | 0.61576200  |
| F | 4.60612900  | 1.98382700  | -0.50407400 |
| F | -0.00376700 | 6.20582900  | 0.18180300  |
| F | -1.47578800 | 5.15074900  | -1.01677300 |
| F | -1.48227700 | 4.92619800  | 1.13396800  |
| F | 2.15346700  | -0.37030800 | 4.63292700  |
| F | 3.64381900  | -1.94927200 | 4.57186400  |
| F | 3.95978200  | -0.10375600 | 3.47294300  |
| F | 3.00567900  | -5.47214500 | 1.38599000  |
| F | 2.46129600  | -4.86366200 | -0.62907700 |
| F | 0.92847800  | -5.51124200 | 0.75181000  |
| F | -6.54860200 | 0.18620200  | 0.26175900  |
| F | -5.37984300 | 1.14591000  | -1.29774100 |
| F | -5.51111900 | -1.01115000 | -1.22649700 |
| F | -4.42409200 | 0.36816600  | 4.51116000  |
| F | -2.36434400 | 1.06213000  | 4.55357100  |
| F | -2.78962100 | -1.05761300 | 4.60137000  |
| C | 1.34849400  | -0.30383200 | -2.77639300 |
| C | 2.51955600  | -1.01920100 | -2.50965500 |
| C | 1.42518500  | 0.94437300  | -3.40287000 |
| C | 3.75948500  | -0.48549000 | -2.87320000 |
| H | 2.47881300  | -1.99055600 | -2.01360800 |
| C | 2.66647400  | 1.46969300  | -3.76397900 |
| H | 0.51979300  | 1.52202500  | -3.59271400 |
| C | 3.83504100  | 0.76044400  | -3.49235700 |
| H | 4.66810400  | -1.04541100 | -2.65527500 |
| H | 2.71839000  | 2.44723000  | -4.24276000 |
| H | 4.80375700  | 1.18540500  | -3.75027700 |

Pre-TS<sub>PE</sub>(L10)

-----  
M06-L electronic energy (Hartree): -4428.170998

M06-L thermal correction to free energy (Hartree): 0.449300

Three lowest frequencies (cm<sup>-1</sup>): 8.43, 9.44, 11.69

-----  
Pd 1.09027000 -0.68282700 -1.52131600

---

|   |             |             |             |
|---|-------------|-------------|-------------|
| O | -0.50447600 | -2.50802100 | -3.21508100 |
| O | 0.37159100  | -2.72196100 | -1.15791800 |
| C | -0.34687900 | -3.13227400 | -2.14793300 |
| C | -1.05626000 | -4.44963200 | -1.91722600 |
| C | 4.61481100  | -0.76257100 | -2.11291000 |
| C | 3.58916900  | -1.73908000 | -1.97216400 |
| C | 4.49643100  | -0.04229600 | -3.27380600 |
| C | 2.61399200  | -1.65848800 | -2.97514500 |
| S | 3.12614800  | -0.50625600 | -4.19015600 |
| O | 5.58697300  | -0.57803400 | -1.18150700 |
| C | 5.28048500  | -1.27419800 | 0.03602600  |
| O | 3.60044200  | -2.67807600 | -1.00448100 |
| C | 4.83721600  | -2.68152400 | -0.25852800 |
| H | 5.11530200  | 0.79118400  | -3.58381100 |
| H | 6.19497700  | -1.26218300 | 0.63232000  |
| H | 4.49281500  | -0.72941800 | 0.57941500  |
| H | 4.63092300  | -3.24053400 | 0.65380900  |
| H | 1.95998800  | -2.47015700 | -3.27806100 |
| H | -1.44244700 | -4.86469700 | -2.85166500 |
| H | -0.39988900 | -5.17742700 | -1.42978800 |
| H | -1.90633600 | -4.28356500 | -1.24180000 |
| H | 5.59647100  | -3.21286700 | -0.84632300 |
| C | -0.76553400 | 1.80404000  | 0.18941900  |
| C | 0.18717600  | 2.67996400  | 0.72997400  |
| C | -1.91600100 | 2.32517500  | -0.39662400 |
| C | -0.01196000 | 4.05059100  | 0.66436600  |
| H | 1.09554000  | 2.29312800  | 1.18576100  |
| C | -2.11020200 | 3.70722500  | -0.45072500 |
| H | -2.66983500 | 1.66485300  | -0.82337400 |
| C | -1.16155900 | 4.57463600  | 0.06972400  |
| H | -1.31077600 | 5.64981200  | 0.01524000  |
| C | 0.25571000  | -0.40786700 | 1.73277600  |
| C | -0.21920800 | 0.20480300  | 2.89877000  |
| C | 1.23680800  | -1.39705700 | 1.82389600  |
| C | 0.28402300  | -0.17954000 | 4.13685900  |
| H | -0.97596600 | 0.98523000  | 2.84599100  |
| C | 1.73141700  | -1.77519800 | 3.07040300  |
| H | 1.60728900  | -1.87679200 | 0.91676100  |
| C | 1.26098100  | -1.16985300 | 4.22933000  |
| H | 1.65116100  | -1.46477100 | 5.20070600  |
| C | -1.96653900 | -0.81280400 | -0.11086600 |
| C | -2.44563100 | -0.98529600 | -1.41272900 |
| C | -2.69705500 | -1.31548600 | 0.96749000  |
| C | -3.64551000 | -1.65429400 | -1.63077000 |

---

|   |             |             |             |
|---|-------------|-------------|-------------|
| H | -1.86053300 | -0.63239100 | -2.26024300 |
| C | -3.89901100 | -1.98014600 | 0.73835000  |
| H | -2.33464000 | -1.20417600 | 1.98679200  |
| C | -4.37727700 | -2.15412900 | -0.55770300 |
| H | -5.31120300 | -2.68532100 | -0.72978000 |
| P | -0.35865800 | 0.03110200  | 0.07292700  |
| C | 2.82548700  | -2.79572000 | 3.13938100  |
| C | -0.20970300 | 0.45190700  | 5.40441800  |
| C | -4.71722400 | -2.50631800 | 1.87892000  |
| C | -4.11942300 | -1.92520800 | -3.02661800 |
| C | -3.35570900 | 4.22153400  | -1.10547900 |
| C | 0.99531100  | 5.00420000  | 1.23183500  |
| F | 1.37862700  | 5.91799900  | 0.31570300  |
| F | 0.48146500  | 5.69780900  | 2.27143800  |
| F | 2.10273700  | 4.38233600  | 1.67306400  |
| F | -3.40346400 | 3.87074700  | -2.40926700 |
| F | -4.46264700 | 3.70596100  | -0.53041800 |
| F | -3.45374100 | 5.56060300  | -1.04539300 |
| F | -0.77924700 | -0.46376900 | 6.21537200  |
| F | 0.80394400  | 1.00609300  | 6.10131900  |
| F | -1.11975800 | 1.41412500  | 5.17739100  |
| F | 2.86519100  | -3.42376100 | 4.32506700  |
| F | 4.04039100  | -2.22433300 | 2.95240400  |
| F | 2.69282900  | -3.73390600 | 2.17834400  |
| F | -5.45217500 | -1.74783500 | -3.14011000 |
| F | -3.52448200 | -1.13008700 | -3.93226100 |
| F | -3.86863800 | -3.20291000 | -3.38573900 |
| F | -5.07618100 | -3.79074000 | 1.67631600  |
| F | -5.86219600 | -1.80528100 | 2.02357500  |
| F | -4.06054400 | -2.44792800 | 3.05068400  |
| C | 1.71619900  | 1.21410200  | -1.73503800 |
| C | 2.80360200  | 1.71466500  | -1.01208000 |
| C | 1.03108700  | 2.06985900  | -2.60527200 |
| C | 3.21524700  | 3.04032000  | -1.17447900 |
| H | 3.33499200  | 1.07436500  | -0.30494400 |
| C | 1.44423500  | 3.39226800  | -2.77006000 |
| H | 0.16152600  | 1.70625500  | -3.15721500 |
| C | 2.53710000  | 3.88125300  | -2.05351300 |
| H | 4.05879800  | 3.41718400  | -0.59656600 |
| H | 0.90288500  | 4.04508200  | -3.45463000 |
| H | 2.84802100  | 4.91805300  | -2.16862600 |

TS<sub>PE</sub>(L10)

-----

---

M06-L electronic energy (Hartree): -4428.144673

M06-L thermal correction to free energy (Hartree): 0.444443

Three lowest frequencies ( $\text{cm}^{-1}$ ): -661.84, 1.38, 7.93

-----

|    |             |             |             |
|----|-------------|-------------|-------------|
| Pd | 1.31504100  | -1.16358700 | -0.93156900 |
| O  | 2.31556900  | -4.31287400 | -1.01339500 |
| O  | 0.55622600  | -3.13747100 | -0.25528900 |
| C  | 1.13897100  | -4.22077600 | -0.49949000 |
| C  | 0.42229300  | -5.50785700 | -0.21882500 |
| C  | 5.52212800  | -1.20630400 | -1.16965100 |
| C  | 4.28315100  | -1.55523000 | -0.56728600 |
| C  | 5.47079100  | -1.28419700 | -2.53950700 |
| C  | 3.25722000  | -1.90934200 | -1.44202800 |
| S  | 3.90762000  | -1.76500300 | -3.06608400 |
| O  | 6.62828700  | -0.84374200 | -0.46032000 |
| C  | 6.29199200  | -0.48934900 | 0.88738700  |
| O  | 4.10810000  | -1.53367600 | 0.78412300  |
| C  | 5.36091100  | -1.50761800 | 1.49235800  |
| H  | 6.28302600  | -1.10351800 | -3.23417400 |
| H  | 7.23681200  | -0.44581300 | 1.43385300  |
| H  | 5.82661600  | 0.50789000  | 0.89624400  |
| H  | 5.11710900  | -1.25985500 | 2.52620400  |
| H  | 2.72734700  | -3.21415200 | -1.21194700 |
| H  | -0.19838000 | -5.76083800 | -1.08692700 |
| H  | 1.12089500  | -6.33049500 | -0.05174900 |
| H  | -0.24687000 | -5.39484200 | 0.63797400  |
| H  | 5.81125000  | -2.50895500 | 1.45717400  |
| C  | -1.33660500 | 1.25625100  | -1.02843100 |
| C  | -0.69806300 | 2.50237300  | -1.11501700 |
| C  | -2.50206700 | 1.03670900  | -1.75969200 |
| C  | -1.23741600 | 3.50717000  | -1.90689100 |
| H  | 0.22466200  | 2.68790100  | -0.56653100 |
| C  | -3.02862800 | 2.04974600  | -2.56299100 |
| H  | -3.01676800 | 0.07797300  | -1.70696100 |
| C  | -2.40417200 | 3.28662500  | -2.63959800 |
| H  | -2.82257600 | 4.07627500  | -3.25787200 |
| C  | -0.06704300 | 0.75683400  | 1.48354200  |
| C  | -0.82632500 | 1.77248200  | 2.07118000  |
| C  | 1.13708300  | 0.37754200  | 2.08096600  |
| C  | -0.38774700 | 2.38519600  | 3.24362100  |
| H  | -1.75942400 | 2.10105400  | 1.61314400  |
| C  | 1.57612900  | 1.00745000  | 3.24124900  |
| H  | 1.74924000  | -0.40157300 | 1.62142900  |
| C  | 0.81723600  | 2.01210800  | 3.83227200  |

---

|   |             |             |             |
|---|-------------|-------------|-------------|
| H | 1.16254400  | 2.50465000  | 4.73606400  |
| C | -1.92702500 | -1.19542900 | 0.37820300  |
| C | -2.17749700 | -2.26729600 | -0.48881700 |
| C | -2.68293700 | -1.06886300 | 1.54150100  |
| C | -3.16596100 | -3.19329100 | -0.18844200 |
| H | -1.57359500 | -2.39000700 | -1.38435400 |
| C | -3.68280300 | -2.00022000 | 1.83088600  |
| H | -2.49814100 | -0.25428600 | 2.24063600  |
| C | -3.92560400 | -3.06537900 | 0.97477400  |
| H | -4.69203400 | -3.79798900 | 1.21438900  |
| P | -0.54708400 | -0.08223700 | -0.06700800 |
| C | 2.91344500  | 0.61390800  | 3.78687600  |
| C | -1.24749800 | 3.45297600  | 3.85074900  |
| C | -4.47600700 | -1.82162000 | 3.08978900  |
| C | -3.40139300 | -4.37913300 | -1.07297000 |
| C | -4.28344700 | 1.76531100  | -3.33040900 |
| C | -0.56114300 | 4.84006800  | -2.02340500 |
| F | 0.02870300  | 4.99064300  | -3.22989100 |
| F | -1.44767900 | 5.85150800  | -1.90374500 |
| F | 0.38718900  | 5.02069400  | -1.08835300 |
| F | -4.70020100 | 2.82380200  | -4.04625900 |
| F | -4.10973300 | 0.73802400  | -4.19013400 |
| F | -5.29312500 | 1.40821000  | -2.50830200 |
| F | -2.44835700 | 2.95942200  | 4.22082000  |
| F | -0.68598400 | 4.00793500  | 4.93805800  |
| F | -1.49499600 | 4.44364400  | 2.96873900  |
| F | 3.15965300  | 1.14590900  | 4.99341000  |
| F | 3.90983400  | 1.01331200  | 2.95806600  |
| F | 3.02958400  | -0.72727600 | 3.89569600  |
| F | -3.18678100 | -5.53378100 | -0.40450100 |
| F | -4.67305000 | -4.42432000 | -1.51964800 |
| F | -2.59224400 | -4.38522400 | -2.14859700 |
| F | -5.36837600 | -2.80866100 | 3.27929300  |
| F | -5.15714900 | -0.65596000 | 3.07866900  |
| F | -3.67325100 | -1.78523900 | 4.17448300  |
| C | 1.98528000  | 0.62737500  | -1.54543700 |
| C | 2.80534500  | 1.42036400  | -0.73391200 |
| C | 1.61306700  | 1.11248800  | -2.80491400 |
| C | 3.21902800  | 2.68473200  | -1.16226900 |
| H | 3.12725200  | 1.05714300  | 0.24385300  |
| C | 2.03065800  | 2.37349400  | -3.23293400 |
| H | 0.97215900  | 0.51375200  | -3.45424400 |
| C | 2.82830200  | 3.16690900  | -2.41007000 |
| H | 3.84849500  | 3.29259900  | -0.51242800 |

---

|   |            |            |             |
|---|------------|------------|-------------|
| H | 1.71467600 | 2.74317000 | -4.20811600 |
| H | 3.13444000 | 4.15961800 | -2.73644100 |

Post-TS<sub>PE</sub>(L10)

-----  
M06-L electronic energy (Hartree): -4428.149857

M06-L thermal correction to free energy (Hartree): 0.448099

Three lowest frequencies (cm<sup>-1</sup>): 5.28, 10.08, 11.85

-----

|    |             |             |             |
|----|-------------|-------------|-------------|
| Pd | -1.51138300 | 0.73509000  | -1.12217900 |
| O  | -2.93691300 | 3.78560300  | -1.51703500 |
| O  | -1.19233600 | 2.87251600  | -0.43153900 |
| C  | -1.82055400 | 3.86342800  | -0.82357500 |
| C  | -1.34115700 | 5.25255500  | -0.57511900 |
| C  | -5.80865900 | 0.62107100  | -1.15978500 |
| C  | -4.49077300 | 0.87042000  | -0.67398700 |
| C  | -5.85039400 | 0.50110300  | -2.52428700 |
| C  | -3.50513400 | 0.96295100  | -1.63766100 |
| S  | -4.26375200 | 0.68156600  | -3.18339800 |
| O  | -6.89882900 | 0.52328900  | -0.34288700 |
| C  | -6.51442700 | 0.30184700  | 1.01956500  |
| O  | -4.22343600 | 0.99602600  | 0.66765700  |
| C  | -5.41293300 | 1.24586600  | 1.42788100  |
| H  | -6.72344500 | 0.36031200  | -3.15011900 |
| H  | -7.41498400 | 0.46113800  | 1.61747100  |
| H  | -6.18185300 | -0.74034300 | 1.14212100  |
| H  | -5.13943600 | 1.10273300  | 2.47489700  |
| H  | -3.16144000 | 2.80593400  | -1.62897700 |
| H  | -0.77232800 | 5.58963200  | -1.44998000 |
| H  | -2.17491600 | 5.94434200  | -0.43659500 |
| H  | -0.67492800 | 5.27537000  | 0.28920600  |
| H  | -5.72990500 | 2.28838200  | 1.27738700  |
| C  | 1.63052400  | -1.08820400 | -0.93942400 |
| C  | 1.24603700  | -2.43614800 | -1.00271900 |
| C  | 2.79774900  | -0.68371200 | -1.58441600 |
| C  | 2.03598100  | -3.35419800 | -1.68221600 |
| H  | 0.32795400  | -2.77095300 | -0.52086000 |
| C  | 3.57614200  | -1.61223300 | -2.27752000 |
| H  | 3.11878900  | 0.35661800  | -1.54910600 |
| C  | 3.20440700  | -2.94818200 | -2.32744200 |
| H  | 3.81924100  | -3.67065100 | -2.85715200 |
| C  | 0.11501300  | -0.71899400 | 1.45685000  |
| C  | 1.00646900  | -1.55364100 | 2.13674000  |
| C  | -1.16341000 | -0.51858800 | 1.98446100  |

---

|   |             |             |             |
|---|-------------|-------------|-------------|
| C | 0.62320600  | -2.16555300 | 3.32871300  |
| H | 2.00316900  | -1.74009000 | 1.73627500  |
| C | -1.54047700 | -1.14175800 | 3.17068100  |
| H | -1.88131600 | 0.11107000  | 1.45268800  |
| C | -0.65140500 | -1.96647400 | 3.85159800  |
| H | -0.94812300 | -2.45418600 | 4.77490400  |
| C | 1.63894800  | 1.49186900  | 0.33978400  |
| C | 1.72971500  | 2.55776400  | -0.56516300 |
| C | 2.35210300  | 1.55108200  | 1.53499400  |
| C | 2.52330800  | 3.65824300  | -0.27317100 |
| H | 1.15802900  | 2.53013100  | -1.49013900 |
| C | 3.15147700  | 2.66044700  | 1.81913000  |
| H | 2.28975300  | 0.74228100  | 2.26188100  |
| C | 3.23890700  | 3.71685200  | 0.92316200  |
| H | 3.85200900  | 4.58390100  | 1.15533000  |
| P | 0.52539700  | 0.11489000  | -0.11895700 |
| C | -2.93348900 | -0.91120900 | 3.67027400  |
| C | 1.61841000  | -3.04142100 | 4.02850800  |
| C | 3.89811200  | 2.68187300  | 3.11852100  |
| C | 2.59039900  | 4.82844300  | -1.20639700 |
| C | 4.82712400  | -1.12981300 | -2.94564500 |
| C | 1.63667500  | -4.79660400 | -1.76901300 |
| F | 1.17582800  | -5.10868500 | -3.00053800 |
| F | 2.68878600  | -5.61111500 | -1.53827000 |
| F | 0.67509500  | -5.11941000 | -0.88719600 |
| F | 5.46772400  | -2.10896700 | -3.60723600 |
| F | 4.56177600  | -0.14675500 | -3.83289900 |
| F | 5.69486500  | -0.61144200 | -2.05007900 |
| F | 2.72764000  | -2.34835200 | 4.36317300  |
| F | 1.12416700  | -3.58260000 | 5.15481800  |
| F | 2.02436600  | -4.05429100 | 3.23433700  |
| F | -3.17437900 | -1.52975100 | 4.83703900  |
| F | -3.85413400 | -1.34915500 | 2.78073900  |
| F | -3.17676000 | 0.40694900  | 3.84954900  |
| F | 2.12574200  | 5.95058000  | -0.61311100 |
| F | 3.85686500  | 5.09072200  | -1.58654500 |
| F | 1.86164300  | 4.63748100  | -2.32195200 |
| F | 4.63714100  | 3.79434100  | 3.26863200  |
| F | 4.73013900  | 1.62410400  | 3.22284500  |
| F | 3.05394500  | 2.60986300  | 4.16961400  |
| C | -1.75532800 | -1.16814000 | -1.69282800 |
| C | -2.42331900 | -2.09212600 | -0.87949800 |
| C | -1.20601600 | -1.60643500 | -2.90353700 |
| C | -2.50385000 | -3.43571900 | -1.25402800 |

---

|   |             |             |             |
|---|-------------|-------------|-------------|
| H | -2.88476300 | -1.76760700 | 0.05525700  |
| C | -1.29630400 | -2.94791400 | -3.27900100 |
| H | -0.67999700 | -0.90454600 | -3.55232200 |
| C | -1.93748000 | -3.86817500 | -2.45209600 |
| H | -3.01348600 | -4.14555900 | -0.60285100 |
| H | -0.84524700 | -3.27657600 | -4.21499500 |
| H | -1.98562900 | -4.91843400 | -2.73521900 |

Int<sub>PE</sub>(L11)

-----  
M06-L electronic energy (Hartree): -3113.340888

M06-L thermal correction to free energy (Hartree): 0.220161

Three lowest frequencies (cm<sup>-1</sup>): 21.94, 26.98, 30.29

-----

|    |             |             |             |
|----|-------------|-------------|-------------|
| Pd | -1.26732600 | 1.61844900  | 0.64830300  |
| O  | -2.87904300 | 2.28933700  | 2.97848900  |
| O  | -2.56433600 | 3.25021600  | 0.96982200  |
| C  | -3.11078200 | 3.17763900  | 2.14516300  |
| C  | -4.11392700 | 4.27301600  | 2.43040500  |
| H  | -3.77656000 | 5.23768700  | 2.03954600  |
| H  | -5.05882000 | 4.03584000  | 1.92662700  |
| H  | -4.31078300 | 4.35698300  | 3.50216900  |
| C  | 0.00266300  | -1.14559800 | -1.20602500 |
| C  | -1.04918900 | -2.03137800 | -0.95133800 |
| C  | 0.63575200  | -1.26752300 | -2.44369800 |
| C  | -1.50909600 | -2.94021600 | -1.88957100 |
| C  | 0.19515800  | -2.17282800 | -3.40219000 |
| C  | -0.88458400 | -3.00338600 | -3.12925500 |
| C  | 0.94813300  | -1.03795000 | 1.40177300  |
| C  | 2.04992900  | -1.85999400 | 1.15117600  |
| C  | 0.29102200  | -1.20389800 | 2.62084800  |
| C  | 2.50300900  | -2.78921100 | 2.07201500  |
| C  | 0.72313100  | -2.13286000 | 3.56028900  |
| C  | 1.83137300  | -2.92307300 | 3.28403400  |
| C  | 1.72553800  | 1.12270800  | -0.42073000 |
| C  | 1.52380800  | 1.92457100  | -1.54974600 |
| C  | 2.91039300  | 1.33847900  | 0.28752900  |
| C  | 2.44762000  | 2.85657200  | -1.98746700 |
| C  | 3.85319300  | 2.27288400  | -0.12744900 |
| C  | 3.62514400  | 3.03037900  | -1.26769700 |
| P  | 0.31825100  | 0.08482300  | 0.11210200  |
| F  | -1.65506200 | -2.00427600 | 0.24303700  |
| F  | -0.79447600 | -0.48690600 | 2.92072600  |
| F  | 0.39031000  | 1.78967600  | -2.25428600 |

---

|   |             |             |             |
|---|-------------|-------------|-------------|
| F | 3.56592200  | -3.54800500 | 1.81317600  |
| F | 2.25134900  | -3.81093600 | 4.17625700  |
| F | 0.07747200  | -2.27455000 | 4.71620400  |
| F | 2.71037400  | -1.73908400 | -0.00663600 |
| F | 3.18545200  | 0.67302300  | 1.41277500  |
| F | 4.97199000  | 2.44787700  | 0.57337100  |
| F | 4.52226500  | 3.92363900  | -1.66575400 |
| F | 2.21597200  | 3.58604900  | -3.07659300 |
| F | 1.70678100  | -0.53333100 | -2.75654900 |
| F | 0.81807000  | -2.26065300 | -4.57656300 |
| F | -1.30639700 | -3.86761900 | -4.04485900 |
| F | -2.54075100 | -3.73577300 | -1.61512400 |
| C | -2.74011500 | 0.67106800  | -0.28141000 |
| C | -3.80110700 | 0.23959100  | 0.51421000  |
| C | -2.75717600 | 0.48684800  | -1.66213000 |
| C | -4.87286700 | -0.42524300 | -0.08414400 |
| H | -3.78808100 | 0.41705700  | 1.58904300  |
| C | -3.84358700 | -0.17048400 | -2.24886600 |
| H | -1.93243400 | 0.82616800  | -2.28652200 |
| C | -4.89297700 | -0.63767500 | -1.46239600 |
| H | -5.69613900 | -0.77632700 | 0.53672600  |
| H | -3.85331500 | -0.32210800 | -3.32769500 |
| H | -5.72981000 | -1.15954300 | -1.92246500 |

Pre-TS<sub>PE</sub>(L11)

-----  
M06-L electronic energy (Hartree): -3894.278578

M06-L thermal correction to free energy (Hartree): 0.321305

Three lowest frequencies (cm<sup>-1</sup>): 15.01, 21.04, 26.14  
-----

|    |             |             |             |
|----|-------------|-------------|-------------|
| Pd | 1.11208800  | -0.70157500 | 0.53679100  |
| O  | 0.45751800  | -3.60215400 | -0.09833600 |
| O  | -0.10477700 | -2.20950700 | 1.57672300  |
| C  | -0.16255600 | -3.33596600 | 0.94663200  |
| C  | -1.06459500 | -4.37179700 | 1.59089800  |
| C  | 4.94738600  | -0.96081200 | 0.22823300  |
| C  | 4.04976900  | -1.27167100 | 1.27574600  |
| C  | 4.58264100  | -1.55451600 | -0.95831500 |
| C  | 2.93185000  | -2.01197800 | 0.86273300  |
| S  | 3.13880800  | -2.46132200 | -0.83072500 |
| O  | 6.04201900  | -0.17575100 | 0.39525800  |
| C  | 6.00526100  | 0.53008200  | 1.64635400  |
| O  | 4.24575000  | -0.88766700 | 2.54740300  |
| C  | 5.57995200  | -0.37720500 | 2.77039800  |

---

|   |             |             |             |
|---|-------------|-------------|-------------|
| H | 5.06625700  | -1.41346800 | -1.91820700 |
| H | 7.01828200  | 0.90259600  | 1.81164900  |
| H | 5.31654000  | 1.38056700  | 1.55597100  |
| H | 5.53485400  | 0.16000800  | 3.71911400  |
| H | 2.42309300  | -2.71665400 | 1.51529300  |
| H | -0.60199200 | -4.74506300 | 2.51234300  |
| H | -2.02651100 | -3.93257600 | 1.87811800  |
| H | -1.23639400 | -5.22041100 | 0.92241400  |
| H | 6.26127700  | -1.23128500 | 2.86950400  |
| C | -0.97452200 | 1.67469800  | -1.07526000 |
| C | -0.35903300 | 2.81500600  | -0.54803000 |
| C | -1.45282900 | 1.77004300  | -2.38197600 |
| C | -0.14985000 | 3.96543300  | -1.28944900 |
| C | -1.25790300 | 2.91423200  | -3.14768300 |
| C | -0.59679800 | 4.00883700  | -2.60526200 |
| C | -1.98893600 | 0.72622500  | 1.35678200  |
| C | -3.31510800 | 1.08743000  | 1.11160500  |
| C | -1.51267200 | 0.88135700  | 2.65863600  |
| C | -4.14935400 | 1.55831400  | 2.11159100  |
| C | -2.32886700 | 1.35455700  | 3.67907000  |
| C | -3.64802700 | 1.69089500  | 3.40318800  |
| C | -1.73942500 | -1.18206300 | -0.85387300 |
| C | -1.14893500 | -1.65448000 | -2.02853200 |
| C | -2.72257300 | -1.99799300 | -0.29059400 |
| C | -1.53374100 | -2.82864400 | -2.65068800 |
| C | -3.11359100 | -3.19318000 | -0.88262000 |
| C | -2.52529300 | -3.60806500 | -2.06910100 |
| P | -0.90031300 | 0.19785100  | -0.00176700 |
| F | 0.04586700  | 2.80813800  | 0.72965500  |
| F | -0.24297700 | 0.60601400  | 2.96852600  |
| F | -0.13637100 | -0.96569200 | -2.57437200 |
| F | -5.41570600 | 1.87976800  | 1.85283800  |
| F | -4.43327100 | 2.14373700  | 4.37308600  |
| F | -1.85151300 | 1.49877300  | 4.91442100  |
| F | -3.81511100 | 0.95387800  | -0.12267900 |
| F | -3.30446500 | -1.69750100 | 0.87579200  |
| F | -4.03751700 | -3.95452600 | -0.29536400 |
| F | -2.89582800 | -4.75149000 | -2.63495000 |
| F | -0.93531800 | -3.23103400 | -3.77096100 |
| F | -2.13517500 | 0.77174500  | -2.95034800 |
| F | -1.72077500 | 2.97193200  | -4.39621900 |
| F | -0.41313400 | 5.10365900  | -3.33513000 |
| F | 0.46312300  | 5.01964500  | -0.75380400 |
| C | 2.17732400  | 0.80729400  | -0.26434700 |

---

|   |            |            |             |
|---|------------|------------|-------------|
| C | 2.76262900 | 1.74149200 | 0.59651900  |
| C | 2.37672100 | 0.94250500 | -1.64211100 |
| C | 3.53405800 | 2.78979700 | 0.08994600  |
| H | 2.61461300 | 1.66042600 | 1.67581000  |
| C | 3.15310700 | 1.98869000 | -2.14763800 |
| H | 1.93297100 | 0.22851000 | -2.33445700 |
| C | 3.73368300 | 2.91511900 | -1.28430100 |
| H | 3.98282600 | 3.50791400 | 0.77676200  |
| H | 3.29774700 | 2.07819200 | -3.22419600 |
| H | 4.33496900 | 3.73249600 | -1.67852600 |

TS<sub>PE</sub>(L11)

-----

M06-L electronic energy (Hartree): -3894.250950

M06-L thermal correction to free energy (Hartree): 0.318161

Three lowest frequencies (cm<sup>-1</sup>): -963.94, 18.41, 21.36

-----

|    |             |             |             |
|----|-------------|-------------|-------------|
| Pd | 1.32334400  | -0.15444300 | -0.24103400 |
| O  | 2.72501300  | -3.02206500 | -0.82974200 |
| O  | 0.94018100  | -2.28497500 | 0.31809200  |
| C  | 1.63146800  | -3.20703900 | -0.18199900 |
| C  | 1.18000600  | -4.63066400 | -0.02837500 |
| C  | 5.56383500  | 0.22235400  | -0.00039800 |
| C  | 4.31016000  | -0.33403100 | 0.36896900  |
| C  | 5.62480000  | 0.51167300  | -1.34112000 |
| C  | 3.38573100  | -0.49391400 | -0.66440000 |
| S  | 4.14837300  | 0.12090400  | -2.12424300 |
| O  | 6.58260600  | 0.42571000  | 0.88120100  |
| C  | 6.11789800  | 0.38733400  | 2.23713700  |
| O  | 4.03232000  | -0.69957300 | 1.64764000  |
| C  | 5.21468200  | -0.79764900 | 2.46186100  |
| H  | 6.47308300  | 0.91612500  | -1.88180400 |
| H  | 7.01159500  | 0.32425500  | 2.86161700  |
| H  | 5.58723000  | 1.32309200  | 2.46635700  |
| H  | 4.86375500  | -0.83951400 | 3.49480000  |
| H  | 3.00807500  | -1.82949700 | -0.79494700 |
| H  | 1.89546600  | -5.18339000 | 0.58971800  |
| H  | 0.19164600  | -4.68197600 | 0.43480700  |
| H  | 1.15540800  | -5.12459200 | -1.00533900 |
| H  | 5.73661700  | -1.73324000 | 2.22023900  |
| C  | -1.89376200 | 1.51071200  | -0.38483900 |
| C  | -1.46622700 | 2.67054100  | 0.26820900  |
| C  | -2.90785500 | 1.66078400  | -1.33132200 |
| C  | -1.96018700 | 3.92759600  | -0.03808400 |

---

|   |             |             |             |
|---|-------------|-------------|-------------|
| C | -3.42418200 | 2.91027800  | -1.65308200 |
| C | -2.94191300 | 4.04614300  | -1.01434900 |
| C | -1.64480100 | -0.32060600 | 1.71453100  |
| C | -3.01813200 | -0.47018200 | 1.91860200  |
| C | -0.82205000 | -0.35843700 | 2.84041100  |
| C | -3.56246900 | -0.66382000 | 3.17719000  |
| C | -1.34408700 | -0.54714900 | 4.11449600  |
| C | -2.71448800 | -0.70092300 | 4.28024300  |
| C | -1.57844500 | -1.36408800 | -1.01469300 |
| C | -1.37142600 | -1.23922100 | -2.39108900 |
| C | -1.93015900 | -2.63531200 | -0.55727000 |
| C | -1.53338300 | -2.28895200 | -3.27919800 |
| C | -2.08471300 | -3.70994000 | -1.42456400 |
| C | -1.88849000 | -3.54011300 | -2.78739900 |
| P | -0.97421900 | -0.00565000 | 0.05012300  |
| F | -0.54190900 | 2.57873600  | 1.23284600  |
| F | 0.50188800  | -0.20384800 | 2.73653000  |
| F | -0.97444500 | -0.05805300 | -2.89055000 |
| F | -4.87521800 | -0.82054900 | 3.33940700  |
| F | -3.21418800 | -0.88690400 | 5.49585100  |
| F | -0.54155900 | -0.57984000 | 5.17705800  |
| F | -3.84417200 | -0.45786100 | 0.86548800  |
| F | -2.09043200 | -2.89776700 | 0.74395400  |
| F | -2.39160100 | -4.91535900 | -0.94376100 |
| F | -2.03283300 | -4.56985200 | -3.61374000 |
| F | -1.33438800 | -2.11390400 | -4.58505700 |
| F | -3.43499200 | 0.60620600  | -1.95921900 |
| F | -4.39371700 | 3.02291700  | -2.56061400 |
| F | -3.43461500 | 5.24058600  | -1.32352600 |
| F | -1.49967200 | 5.00983900  | 0.58740000  |
| C | 1.62867300  | 1.78985500  | -0.61986400 |
| C | 2.46912000  | 2.51375000  | 0.23745400  |
| C | 0.98870100  | 2.47197500  | -1.66098400 |
| C | 2.63295900  | 3.89003600  | 0.07868100  |
| H | 2.98612700  | 2.00534700  | 1.05254800  |
| C | 1.16025300  | 3.84983700  | -1.82276200 |
| H | 0.32727900  | 1.94074800  | -2.34537600 |
| C | 1.97563800  | 4.56518300  | -0.94983800 |
| H | 3.27926700  | 4.43699600  | 0.76525300  |
| H | 0.64004800  | 4.36270100  | -2.63214400 |
| H | 2.10269500  | 5.63964600  | -1.07115500 |

Post-TS<sub>PE</sub>(L11)

-----

---

M06-L electronic energy (Hartree): -3894.259163

M06-L thermal correction to free energy (Hartree): 0.319026

Three lowest frequencies ( $\text{cm}^{-1}$ ): 11.82, 13.72, 19.32

-----

|    |             |             |             |
|----|-------------|-------------|-------------|
| Pd | 1.26934200  | 0.55986200  | 0.23513000  |
| O  | 3.18684900  | -1.65289100 | -1.22409200 |
| O  | 1.64820800  | -1.69286600 | 0.41731400  |
| C  | 2.42039300  | -2.27926000 | -0.34622700 |
| C  | 2.57661100  | -3.75986900 | -0.35420100 |
| C  | 5.59936400  | 1.12062200  | 0.43179800  |
| C  | 4.33674900  | 0.50877900  | 0.70474900  |
| C  | 5.48707000  | 2.23223700  | -0.35856900 |
| C  | 3.24265900  | 1.12146400  | 0.12524200  |
| S  | 3.82740200  | 2.51566300  | -0.74558200 |
| O  | 6.78595700  | 0.62894400  | 0.89769500  |
| C  | 6.60314000  | -0.35578400 | 1.92110300  |
| O  | 4.24346800  | -0.62469300 | 1.47933200  |
| C  | 5.49570300  | -1.31159600 | 1.55695700  |
| H  | 6.28265800  | 2.87323000  | -0.71818800 |
| H  | 7.56075800  | -0.87405700 | 2.01547600  |
| H  | 6.37294500  | 0.14371500  | 2.87370000  |
| H  | 5.37294800  | -2.08406400 | 2.32026000  |
| H  | 3.09962900  | -0.67412000 | -1.06271400 |
| H  | 3.41528200  | -4.03039000 | 0.29838500  |
| H  | 1.67676300  | -4.23986900 | 0.03607300  |
| H  | 2.80706800  | -4.13032800 | -1.35610600 |
| H  | 5.71029100  | -1.79488900 | 0.59053500  |
| C  | -2.27298500 | 0.97522600  | -0.36406300 |
| C  | -2.41970200 | 1.99772100  | 0.57848700  |
| C  | -3.05707300 | 1.06376300  | -1.51331200 |
| C  | -3.23252200 | 3.09898400  | 0.36935500  |
| C  | -3.88249900 | 2.15756200  | -1.74797700 |
| C  | -3.96180200 | 3.18082600  | -0.81140200 |
| C  | -1.73025100 | -1.11629200 | 1.41304300  |
| C  | -2.96492100 | -1.75169500 | 1.27080000  |
| C  | -1.15195100 | -1.11424600 | 2.68166200  |
| C  | -3.59877300 | -2.37655100 | 2.33184100  |
| C  | -1.76789100 | -1.73150600 | 3.76370800  |
| C  | -2.99214600 | -2.36320400 | 3.58486400  |
| C  | -0.84131900 | -1.42379900 | -1.35081800 |
| C  | -0.47508300 | -0.92841200 | -2.60547500 |
| C  | -0.80333200 | -2.81237600 | -1.20603100 |
| C  | -0.13645300 | -1.74346700 | -3.67288400 |
| C  | -0.45245700 | -3.65447900 | -2.25567000 |

---

|   |             |             |             |
|---|-------------|-------------|-------------|
| C | -0.12317600 | -3.12225700 | -3.49466300 |
| P | -0.95420600 | -0.22509700 | 0.02761000  |
| F | -1.75570000 | 1.91247100  | 1.73979500  |
| F | 0.01461100  | -0.50004000 | 2.90383500  |
| F | -0.42399900 | 0.39770600  | -2.79602800 |
| F | -4.77026600 | -2.98859600 | 2.16726300  |
| F | -3.58781600 | -2.95655600 | 4.61237300  |
| F | -1.19796800 | -1.71503600 | 4.96758000  |
| F | -3.55139700 | -1.78585100 | 0.06832700  |
| F | -1.05242100 | -3.40358700 | -0.03190600 |
| F | -0.40366400 | -4.97240400 | -2.06237400 |
| F | 0.21506600  | -3.92277800 | -4.49844100 |
| F | 0.19566500  | -1.21765600 | -4.85022400 |
| F | -3.06031900 | 0.09133100  | -2.42995700 |
| F | -4.61464500 | 2.21978500  | -2.86030100 |
| F | -4.75304900 | 4.22499500  | -1.03404000 |
| F | -3.32135200 | 4.06523200  | 1.28146400  |
| C | 0.79281700  | 2.50254200  | 0.13634900  |
| C | 0.86167800  | 3.28961200  | 1.29210800  |
| C | 0.32734000  | 3.08472100  | -1.04812700 |
| C | 0.42935000  | 4.61593200  | 1.27365700  |
| H | 1.23446400  | 2.86167600  | 2.22309200  |
| C | -0.09644900 | 4.41645600  | -1.06609200 |
| H | 0.28083000  | 2.50236800  | -1.96666600 |
| C | -0.05499400 | 5.18390600  | 0.09533300  |
| H | 0.47546300  | 5.20854200  | 2.18709600  |
| H | -0.46564400 | 4.84876200  | -1.99612800 |
| H | -0.39167100 | 6.21919600  | 0.08279100  |

(DMAc)Pd(Ph)(OAc)

-----

M06-L electronic energy (Hartree): -876.082597

M06-L thermal correction to free energy (Hartree): 0.223900

Three lowest frequencies (cm-1): 26.72, 40.70, 45.71

-----

|    |             |             |             |
|----|-------------|-------------|-------------|
| Pd | 0.12380200  | -0.44432200 | 0.22037600  |
| O  | -0.89582100 | 1.37095600  | 0.67935700  |
| O  | 0.79938500  | -2.41884900 | -0.02917400 |
| O  | -1.37076000 | -2.17509600 | 0.30704100  |
| C  | -2.12037500 | 1.59497900  | 0.47242400  |
| C  | -0.37810600 | -2.92677600 | 0.09500200  |
| C  | -0.52849700 | -4.40825400 | -0.04617000 |
| C  | -2.87700600 | 2.37154100  | 1.50750800  |
| N  | -2.76770800 | 1.18839000  | -0.62955900 |

---

|   |             |             |             |
|---|-------------|-------------|-------------|
| C | -2.06259000 | 0.63840500  | -1.77658000 |
| C | -4.20482400 | 1.33829400  | -0.80068500 |
| H | -2.12918500 | -0.45589700 | -1.79697900 |
| H | -1.01173300 | 0.93501100  | -1.74839000 |
| H | -2.52119400 | 1.03995200  | -2.68601200 |
| H | -4.70961800 | 1.41226800  | 0.16225900  |
| H | -4.58746400 | 0.45387600  | -1.31832500 |
| H | -4.43940700 | 2.22449500  | -1.40332700 |
| H | -3.50890700 | 3.15033000  | 1.07063300  |
| H | -2.16112500 | 2.82640200  | 2.19339800  |
| H | -3.52436300 | 1.70602800  | 2.09090900  |
| H | 0.29805600  | -4.93175600 | 0.44260100  |
| H | -1.48070600 | -4.74644800 | 0.36880500  |
| H | -0.50062500 | -4.67893800 | -1.10802000 |
| C | 1.83432100  | 0.51284800  | 0.00919500  |
| C | 3.00360600  | -0.25646800 | 0.00024700  |
| C | 1.92173800  | 1.90150800  | -0.14262600 |
| C | 4.24745500  | 0.35840200  | -0.15264200 |
| H | 2.94370900  | -1.33890500 | 0.10809500  |
| C | 3.17042200  | 2.50735100  | -0.30042200 |
| H | 1.02073200  | 2.51202600  | -0.13284600 |
| C | 4.33457600  | 1.74117500  | -0.30387200 |
| H | 5.15080700  | -0.25111700 | -0.15410600 |
| H | 3.22835500  | 3.58916700  | -0.41992300 |
| H | 5.30498800  | 2.21945600  | -0.42521700 |

Pre-TS<sub>PE</sub>(DMAc)

-----

M06-L electronic energy (Hartree): -1657.008335

M06-L thermal correction to free energy (Hartree): 0.328189

Three lowest frequencies (cm-1): 27.98, 31.24, 39.63

-----

|    |            |             |             |
|----|------------|-------------|-------------|
| Pd | 0.49723200 | -0.00734000 | -0.19140100 |
| O  | 1.94517600 | 1.61705700  | -0.62742300 |
| O  | 1.97334200 | -1.64338700 | -2.18620600 |
| O  | 2.20254100 | -1.35986200 | 0.03090100  |
| C  | 3.13188800 | 1.47424500  | -0.23514700 |
| C  | 2.54966100 | -1.86186700 | -1.10440200 |
| C  | 3.75039100 | -2.78731900 | -1.04608700 |
| C  | 4.24632800 | 1.54483000  | -1.23780100 |
| N  | 3.43239700 | 1.29309800  | 1.06324300  |
| C  | 2.36599100 | 1.23944300  | 2.04592600  |
| C  | 4.72904100 | 0.83979900  | 1.53118100  |
| H  | 1.94221800 | 0.22590400  | 2.11153500  |

---

|   |             |             |             |
|---|-------------|-------------|-------------|
| H | 1.57111700  | 1.93679400  | 1.77215600  |
| H | 2.77578000  | 1.51978300  | 3.02058000  |
| H | 5.49039300  | 0.95593700  | 0.76123900  |
| H | 4.67563100  | -0.22004000 | 1.81411900  |
| H | 5.02862300  | 1.42001600  | 2.40996000  |
| H | 5.05098200  | 2.22112400  | -0.93248500 |
| H | 3.83490700  | 1.88495900  | -2.18913100 |
| H | 4.68940500  | 0.55366500  | -1.39456500 |
| C | -2.88000500 | -1.20374100 | 1.00472700  |
| C | -2.14194900 | -1.45019900 | -0.17001600 |
| C | -2.13187500 | -1.39159600 | 2.14711700  |
| C | -0.76545800 | -1.70420000 | 0.05248000  |
| S | -0.51433700 | -1.82179700 | 1.81590200  |
| O | -4.17631000 | -0.80429400 | 0.98769600  |
| C | -4.52635400 | -0.28538800 | -0.30741500 |
| O | -2.67397300 | -1.43052600 | -1.39565800 |
| C | -4.10896100 | -1.24162400 | -1.39342800 |
| H | -2.45738000 | -1.19649100 | 3.16263400  |
| H | -5.61040200 | -0.15787200 | -0.29936000 |
| H | -4.04413600 | 0.69328600  | -0.44369400 |
| H | -4.35415100 | -0.85321500 | -2.38367700 |
| H | -0.22980500 | -2.42198300 | -0.56934100 |
| H | 4.09367300  | -3.06374900 | -2.04661500 |
| H | 4.57447000  | -2.31893000 | -0.49584200 |
| H | 3.48989400  | -3.70266000 | -0.50137900 |
| H | -4.57976700 | -2.22299400 | -1.26088500 |
| C | -1.00420800 | 1.29257600  | -0.25608600 |
| C | -1.47300700 | 1.77046900  | -1.48453100 |
| C | -1.55477200 | 1.79970800  | 0.92528300  |
| C | -2.46340100 | 2.75561500  | -1.52781500 |
| H | -1.07005800 | 1.37303700  | -2.41790100 |
| C | -2.54465800 | 2.78416400  | 0.88209600  |
| H | -1.22176100 | 1.41325100  | 1.89255400  |
| C | -3.00037100 | 3.26506800  | -0.34545200 |
| H | -2.81884500 | 3.12143500  | -2.49103500 |
| H | -2.96176700 | 3.17225200  | 1.81123300  |
| H | -3.77498600 | 4.02937200  | -0.38105500 |

TS<sub>PE</sub>(DMAc)

-----

M06-L electronic energy (Hartree): -1656.986525

M06-L thermal correction to free energy (Hartree): 0.323925

Three lowest frequencies (cm-1): -1154.71, 27.87, 32.95

-----

---

|    |             |             |             |
|----|-------------|-------------|-------------|
| Pd | 0.58268300  | 0.17934800  | -0.15922900 |
| O  | 2.23909400  | 1.33505000  | -1.10660200 |
| O  | 0.62617900  | -3.02687800 | 0.44000700  |
| O  | 2.08178500  | -1.45507700 | -0.24289500 |
| C  | 3.40864500  | 0.92101900  | -0.90676700 |
| C  | 1.79125900  | -2.63696000 | 0.06797500  |
| C  | 2.86791600  | -3.68505500 | 0.04220200  |
| C  | 4.24622200  | 0.46725100  | -2.06447000 |
| N  | 3.94331900  | 0.89041700  | 0.32925500  |
| C  | 3.12869400  | 1.29897600  | 1.45782200  |
| C  | 5.13329300  | 0.12115500  | 0.64650700  |
| H  | 2.45954500  | 0.48603900  | 1.78154300  |
| H  | 2.51635200  | 2.15812100  | 1.17573000  |
| H  | 3.78629100  | 1.57371900  | 2.28683100  |
| H  | 5.81091300  | 0.07722900  | -0.20622500 |
| H  | 4.86096100  | -0.90381200 | 0.93625100  |
| H  | 5.65858000  | 0.59549900  | 1.47996000  |
| H  | 5.23950700  | 0.92728700  | -2.07803800 |
| H  | 3.72516300  | 0.71298900  | -2.99094500 |
| H  | 4.38370600  | -0.62032700 | -2.02395200 |
| C  | -3.35354600 | -1.07654400 | 0.63693800  |
| C  | -2.15942600 | -1.12791000 | -0.12703200 |
| C  | -3.11060500 | -0.85341100 | 1.97017300  |
| C  | -0.96857600 | -0.95192100 | 0.58963500  |
| S  | -1.42992400 | -0.68620500 | 2.27604000  |
| O  | -4.59396400 | -1.23464900 | 0.09603000  |
| C  | -4.56690100 | -1.03023500 | -1.32286100 |
| O  | -2.16470400 | -1.35239900 | -1.46198200 |
| C  | -3.44014200 | -1.80789900 | -1.95188600 |
| H  | -3.84791600 | -0.80093900 | 2.76332200  |
| H  | -5.53433500 | -1.37125100 | -1.69748400 |
| H  | -4.45851500 | 0.04434800  | -1.53353000 |
| H  | -3.41190200 | -1.66371300 | -3.03388400 |
| H  | -0.14066700 | -2.03535200 | 0.49470000  |
| H  | 2.47428300  | -4.64487700 | -0.30246100 |
| H  | 3.70310400  | -3.37119500 | -0.58862800 |
| H  | 3.24654800  | -3.83451700 | 1.06029700  |
| H  | -3.54032500 | -2.87923700 | -1.73385600 |
| C  | -0.65702300 | 1.72437700  | -0.09691600 |
| C  | -1.63031400 | 1.93046200  | -1.08408700 |
| C  | -0.52456700 | 2.68124100  | 0.91897800  |
| C  | -2.42605400 | 3.07843800  | -1.07430500 |
| H  | -1.77753500 | 1.18676900  | -1.86811400 |
| C  | -1.31981000 | 3.82937400  | 0.92721900  |

---

|   |             |            |             |
|---|-------------|------------|-------------|
| H | 0.20511900  | 2.53435700 | 1.71756900  |
| C | -2.27348300 | 4.03205100 | -0.06932000 |
| H | -3.17467000 | 3.22085000 | -1.85417000 |
| H | -1.19482300 | 4.56554800 | 1.72141400  |
| H | -2.89785400 | 4.92397600 | -0.05851100 |

Post-TS<sub>PE</sub>(DMAc)

-----  
M06-L electronic energy (Hartree): -1656.997281

M06-L thermal correction to free energy (Hartree): 0.326706

Three lowest frequencies (cm-1): 21.93, 23.96, 34.54  
-----

|    |             |             |             |
|----|-------------|-------------|-------------|
| Pd | 0.52922300  | 0.30578300  | -0.08351500 |
| O  | 2.49946900  | 0.92934000  | -0.93550700 |
| O  | -0.17452600 | -3.05118100 | 0.26338200  |
| O  | 1.58421400  | -1.71486600 | -0.16130300 |
| C  | 3.53753400  | 0.23905600  | -0.79299200 |
| C  | 1.09802600  | -2.84067800 | -0.02713000 |
| C  | 1.90063700  | -4.08881300 | -0.15771700 |
| C  | 4.26222800  | -0.26590100 | -2.00572400 |
| N  | 4.03448900  | -0.04883500 | 0.42550100  |
| C  | 3.33024600  | 0.41310600  | 1.60665700  |
| C  | 5.03193200  | -1.07664700 | 0.65930900  |
| H  | 2.48588100  | -0.24826300 | 1.85061100  |
| H  | 2.94528200  | 1.42088900  | 1.43783700  |
| H  | 4.02783700  | 0.42859000  | 2.44840300  |
| H  | 5.57472300  | -1.31648300 | -0.25415500 |
| H  | 4.55092300  | -1.99179000 | 1.03226500  |
| H  | 5.74902900  | -0.73000700 | 1.41030600  |
| H  | 5.33974600  | -0.07743800 | -1.97177900 |
| H  | 3.84231300  | 0.21835100  | -2.88856500 |
| H  | 4.11706200  | -1.34868000 | -2.10817000 |
| C  | -3.51900700 | -0.98054300 | 0.66815500  |
| C  | -2.35735000 | -0.71429500 | -0.12274100 |
| C  | -3.32162300 | -0.74073500 | 2.00087000  |
| C  | -1.24908400 | -0.29477000 | 0.58270000  |
| S  | -1.70256500 | -0.18444600 | 2.26631800  |
| O  | -4.68567900 | -1.45145600 | 0.13780800  |
| C  | -4.72623900 | -1.31067000 | -1.28753200 |
| O  | -2.35499100 | -0.88395600 | -1.48657700 |
| C  | -3.42168500 | -1.74008000 | -1.90956000 |
| H  | -4.02039800 | -0.89472100 | 2.81405000  |
| H  | -5.55430700 | -1.93705300 | -1.62821400 |
| H  | -4.94119500 | -0.26317000 | -1.54583400 |

---

|   |             |             |             |
|---|-------------|-------------|-------------|
| H | -3.46043800 | -1.66414000 | -2.99870400 |
| H | -0.61874300 | -2.16251500 | 0.36533700  |
| H | 1.35943500  | -4.83938100 | -0.74015900 |
| H | 2.86554700  | -3.87422600 | -0.61940700 |
| H | 2.07140700  | -4.51470500 | 0.83739500  |
| H | -3.18925400 | -2.77959700 | -1.63115200 |
| C | -0.21586900 | 2.14366700  | -0.13469200 |
| C | -1.39153000 | 2.48952200  | -0.81733500 |
| C | 0.52424200  | 3.16743600  | 0.47428800  |
| C | -1.79562800 | 3.82270700  | -0.91073600 |
| H | -1.99616500 | 1.71319000  | -1.28538900 |
| C | 0.11144300  | 4.49872200  | 0.39099200  |
| H | 1.44293300  | 2.93016100  | 1.01290600  |
| C | -1.04993400 | 4.83169700  | -0.30402600 |
| H | -2.70546800 | 4.07130900  | -1.45756800 |
| H | 0.70357100  | 5.27720400  | 0.87221600  |
| H | -1.37227900 | 5.86974200  | -0.36925800 |

(L4)Pd(EDOT)(OAc)(EDOT-NH<sub>2</sub>)

-----  
M06-L electronic energy (Hartree): -3048.881644

M06-L thermal correction to free energy (Hartree): 0.513514

Three lowest frequencies (cm<sup>-1</sup>): 9.56, 14.34, 21.59

-----

|    |             |             |             |
|----|-------------|-------------|-------------|
| C  | -2.66520500 | 2.14103900  | 0.72205200  |
| C  | -1.84261700 | 2.96257600  | 1.50658800  |
| C  | -3.93496300 | 2.59604000  | 0.35588500  |
| C  | -2.28437000 | 4.21614500  | 1.91581700  |
| C  | -4.36947600 | 3.85728500  | 0.75872800  |
| C  | -3.54799900 | 4.66857500  | 1.53761500  |
| C  | -2.00746500 | -0.29840100 | 1.95595000  |
| C  | -3.20697500 | -0.58505200 | 2.62453600  |
| C  | -0.79148500 | -0.50273000 | 2.61349000  |
| C  | -3.18211400 | -1.10691700 | 3.91253000  |
| C  | -0.76933700 | -1.01693800 | 3.90815600  |
| C  | -1.96250700 | -1.32724300 | 4.55444800  |
| C  | -3.27795000 | -0.37128500 | -0.67727200 |
| C  | -3.72546400 | 0.22344900  | -1.86658600 |
| C  | -3.68123500 | -1.67545700 | -0.36870600 |
| C  | -4.60166700 | -0.46188600 | -2.70277300 |
| C  | -4.55160000 | -2.35851500 | -1.21362700 |
| C  | -5.01982500 | -1.75138600 | -2.37640400 |
| P  | -2.01407800 | 0.48333600  | 0.30798500  |
| Pd | -0.01083300 | 0.48791400  | -0.76064000 |

---

|   |             |             |             |
|---|-------------|-------------|-------------|
| O | -1.44912300 | 2.62555300  | -2.17437900 |
| O | 0.26280400  | 2.61337000  | -0.71534200 |
| C | -0.59784600 | 3.20536800  | -1.47651200 |
| C | -0.55234900 | 4.71702200  | -1.43951000 |
| C | -0.16865600 | -1.51014300 | -0.94734500 |
| C | 0.17420000  | -2.59361800 | -0.17506800 |
| S | -0.76359200 | -2.10106200 | -2.47482100 |
| C | -0.07008000 | -3.86825500 | -0.78268600 |
| C | -0.58456700 | -3.77123500 | -2.04573400 |
| H | -0.85545500 | -4.57206700 | -2.72274300 |
| O | 0.75442400  | -2.50436400 | 1.07076800  |
| C | 0.53275600  | -3.69299900 | 1.83033300  |
| H | -0.53234800 | -3.76218600 | 2.10562900  |
| O | 0.16171000  | -5.05452200 | -0.14393600 |
| C | 0.95427300  | -4.90572300 | 1.03963100  |
| H | 0.81077600  | -5.82468600 | 1.61406600  |
| H | 2.01548700  | -4.82558600 | 0.76097600  |
| H | 1.12702100  | -3.59012100 | 2.74245500  |
| C | 5.72065100  | 0.01431200  | 0.16664800  |
| C | 4.78419300  | 1.08251900  | 0.33407300  |
| C | 7.00846900  | 0.45386200  | 0.03153500  |
| C | 5.37691200  | 2.31425500  | 0.32986600  |
| S | 7.08327100  | 2.17488900  | 0.11777100  |
| O | 5.33994900  | -1.29440100 | 0.12244800  |
| C | 4.02575000  | -1.48195800 | 0.66645000  |
| O | 3.44448500  | 0.86998700  | 0.49673900  |
| C | 3.04738500  | -0.46881000 | 0.11837900  |
| C | 2.87846800  | -0.54773000 | -1.38552900 |
| H | 7.90340400  | -0.13866000 | -0.10719100 |
| H | 3.72614500  | -2.49674700 | 0.39172400  |
| H | 4.06731000  | -1.40780700 | 1.76217700  |
| H | 2.07114200  | -0.61150100 | 0.59771300  |
| H | 3.84460700  | -0.41530800 | -1.89324000 |
| H | 2.48497800  | -1.53637900 | -1.64869000 |
| H | 4.90485900  | 3.28146900  | 0.44118400  |
| H | -1.28972600 | 5.06710900  | -0.70512600 |
| H | 0.42670900  | 5.09599500  | -1.13255300 |
| H | -0.82771000 | 5.14199400  | -2.40931800 |
| N | 1.90596200  | 0.46091100  | -1.82745300 |
| H | 2.28426600  | 1.39740300  | -1.68265100 |
| H | 1.74307100  | 0.36712200  | -2.82855400 |
| H | -4.59340200 | 1.96542800  | -0.23800300 |
| H | -5.35970400 | 4.20183800  | 0.46639800  |
| H | -4.16280700 | -0.40313200 | 2.13243100  |

---

|   |             |             |             |
|---|-------------|-------------|-------------|
| H | -4.11667500 | -1.33821400 | 4.41992900  |
| H | -3.30287300 | -2.16744100 | 0.52636100  |
| H | -4.85919300 | -3.37201400 | -0.96301600 |
| H | -1.94592900 | -1.73506300 | 5.56340500  |
| H | -5.70116000 | -2.28693100 | -3.03487900 |
| H | -3.89264800 | 5.65141200  | 1.85352900  |
| H | -4.95074600 | 0.00979800  | -3.61951100 |
| H | -1.63777500 | 4.84349200  | 2.52635600  |
| H | 0.18426000  | -1.18091400 | 4.40714100  |
| H | 0.13794000  | -0.27006600 | 2.09503500  |
| H | -0.84996600 | 2.61498700  | 1.79338100  |
| H | -3.35878900 | 1.21309400  | -2.13993600 |

(L5)Pd(EDOT)(OAc)(EDOT-NH<sub>2</sub>)

-----  
M06-L electronic energy (Hartree): -3166.845634

M06-L thermal correction to free energy (Hartree): 0.599181

Three lowest frequencies (cm<sup>-1</sup>): 17.94, 26.62, 37.57

-----

|    |             |             |             |
|----|-------------|-------------|-------------|
| C  | 2.84473700  | -2.00742800 | -0.08448300 |
| C  | 2.43977100  | -3.26611500 | 0.42171300  |
| C  | 4.00801900  | -1.92950300 | -0.86196900 |
| C  | 3.18159400  | -4.39469400 | 0.05423300  |
| C  | 4.73581700  | -3.06516700 | -1.20203300 |
| C  | 4.30678000  | -4.31081200 | -0.75850000 |
| C  | 1.94306400  | -0.48704200 | 2.11361800  |
| C  | 3.22529100  | -0.62389600 | 2.67097900  |
| C  | 0.81561200  | -0.47781200 | 2.96041900  |
| C  | 3.41641600  | -0.71077000 | 4.04371600  |
| C  | 1.03427500  | -0.56526200 | 4.34199800  |
| C  | 2.30820300  | -0.67525500 | 4.88572500  |
| C  | 2.94548000  | 0.92601200  | -0.25082200 |
| C  | 3.17061500  | 1.19404600  | -1.62284900 |
| C  | 3.39641900  | 1.84477100  | 0.70654600  |
| C  | 3.85755900  | 2.36527500  | -1.96414400 |
| C  | 4.07214200  | 3.00390500  | 0.34003000  |
| C  | 4.30466700  | 3.26677500  | -1.00583800 |
| P  | 1.88039900  | -0.47811800 | 0.27460600  |
| Pd | -0.14598100 | -0.36396400 | -0.82217500 |
| O  | 0.51708300  | -2.48165200 | -2.77607400 |
| O  | -0.56724000 | -2.47049600 | -0.80474500 |
| C  | -0.07447400 | -3.05665700 | -1.84696100 |
| C  | -0.23311700 | -4.56282900 | -1.85780800 |
| C  | 0.01634700  | 1.62935800  | -0.98088900 |

---

|   |             |             |             |
|---|-------------|-------------|-------------|
| C | 0.11074400  | 2.63727000  | -0.05666800 |
| S | -0.11869400 | 2.35598700  | -2.56180600 |
| C | 0.04682300  | 3.96084200  | -0.59495900 |
| C | -0.08163800 | 3.98046400  | -1.95713200 |
| H | -0.12998400 | 4.83948100  | -2.61447900 |
| O | 0.25533600  | 2.40691300  | 1.29281300  |
| C | 0.67535700  | 3.57681100  | 1.99736000  |
| H | 1.74542200  | 3.75444300  | 1.80815500  |
| O | 0.11839000  | 5.07980800  | 0.18703500  |
| C | -0.12708900 | 4.77824000  | 1.56526800  |
| H | 0.16058000  | 5.67066900  | 2.12641100  |
| H | -1.20192700 | 4.59290800  | 1.71413000  |
| H | 0.53164300  | 3.35961800  | 3.05982700  |
| C | -5.80605200 | 0.18811100  | 0.31342200  |
| C | -4.81784900 | -0.82498800 | 0.51824000  |
| C | -7.07768000 | -0.31252400 | 0.26520300  |
| C | -5.35490200 | -2.07807500 | 0.62378700  |
| S | -7.07211400 | -2.02433300 | 0.47182800  |
| O | -5.48456200 | 1.50427800  | 0.15580100  |
| C | -4.15995900 | 1.78426500  | 0.62922900  |
| O | -3.48351300 | -0.54514000 | 0.61236200  |
| C | -3.16130900 | 0.77288400  | 0.11280800  |
| C | -3.06509500 | 0.74266700  | -1.39791400 |
| H | -8.00257600 | 0.23013300  | 0.11941500  |
| H | -3.91754200 | 2.78965100  | 0.27369700  |
| H | -4.15534100 | 1.78391800  | 1.72807400  |
| H | -2.16966000 | 0.98968700  | 0.52890800  |
| H | -4.05165400 | 0.55349500  | -1.84457600 |
| H | -2.71456700 | 1.71861300  | -1.75228400 |
| H | -4.83686600 | -3.01502300 | 0.78208600  |
| H | 0.66778000  | -5.01110300 | -1.41861200 |
| H | -1.08971100 | -4.89260400 | -1.26265400 |
| H | -0.32286900 | -4.94171800 | -2.88009300 |
| N | -2.09699400 | -0.27834400 | -1.82554100 |
| H | -2.46488600 | -1.20931700 | -1.62489500 |
| H | -1.97131400 | -0.23003900 | -2.83573900 |
| H | 4.37033600  | -0.96015200 | -1.19270600 |
| H | 5.63320200  | -2.97004300 | -1.81005900 |
| H | 4.09120100  | -0.65871000 | 2.00901600  |
| H | 4.42106300  | -0.81063400 | 4.44893400  |
| H | 3.19445600  | 1.67098600  | 1.76019400  |
| H | 4.40681000  | 3.69934500  | 1.10779400  |
| H | 2.43397100  | -0.74567500 | 5.96450300  |
| H | 4.82792100  | 4.17136800  | -1.31033400 |

---

|   |             |             |             |
|---|-------------|-------------|-------------|
| H | 4.85481100  | -5.21239200 | -1.02566800 |
| H | 4.02918400  | 2.57126100  | -3.02104000 |
| H | 2.86176900  | -5.36567200 | 0.43373500  |
| H | 0.16721000  | -0.56127300 | 5.00183500  |
| C | -0.59677700 | -0.42293000 | 2.47015600  |
| H | -0.79388700 | 0.52251800  | 1.95504700  |
| H | -0.82260100 | -1.22601300 | 1.75566800  |
| H | -1.30089400 | -0.51288300 | 3.30494800  |
| C | 1.31507500  | -3.45084500 | 1.39524500  |
| H | 1.66115900  | -3.27794000 | 2.42417200  |
| H | 0.47567800  | -2.77806800 | 1.20533800  |
| H | 0.92934000  | -4.47575400 | 1.34883300  |
| C | 2.72470200  | 0.29695000  | -2.74074100 |
| H | 2.34362900  | 0.89455700  | -3.57634400 |
| H | 3.56161800  | -0.29676900 | -3.13303100 |
| H | 1.93718100  | -0.41077600 | -2.45226100 |

(L6)Pd(EDOT)(OAc)(EDOT-NH<sub>2</sub>)

-----  
M06-L electronic energy (Hartree): -3392.515614

M06-L thermal correction to free energy (Hartree): 0.609507

Three lowest frequencies (cm<sup>-1</sup>): 15.63, 24.04, 32.01

-----

|    |            |             |             |
|----|------------|-------------|-------------|
| C  | 2.93135400 | -1.66225400 | 0.79080200  |
| C  | 2.30113500 | -2.67497500 | 1.54077000  |
| C  | 4.21646700 | -1.89072200 | 0.29963100  |
| C  | 2.91963500 | -3.91331700 | 1.72263700  |
| C  | 4.85325700 | -3.11356800 | 0.50432500  |
| C  | 4.19299000 | -4.12445100 | 1.19824800  |
| C  | 1.84331900 | 0.61461500  | 2.11626900  |
| C  | 3.02369800 | 1.07138400  | 2.71572200  |
| C  | 0.63845200 | 0.69815700  | 2.84976100  |
| C  | 3.02496600 | 1.68460900  | 3.96323400  |
| C  | 0.63501500 | 1.34260900  | 4.09468800  |
| C  | 1.81634100 | 1.83700600  | 4.63654300  |
| C  | 3.04408400 | 0.93035000  | -0.51480100 |
| C  | 3.42849200 | 0.48663400  | -1.80053400 |
| C  | 3.37441200 | 2.23676300  | -0.14641100 |
| C  | 4.21392600 | 1.29255200  | -2.62700200 |
| C  | 4.12924800 | 3.05851900  | -0.98101800 |
| C  | 4.56496800 | 2.57346500  | -2.20950700 |
| P  | 1.95205400 | -0.15620800 | 0.46540600  |
| Pd | 0.02180100 | -0.53228900 | -0.67686400 |
| O  | 0.22340500 | -2.60097900 | -2.85663200 |

---

|   |             |             |             |
|---|-------------|-------------|-------------|
| O | 0.21341400  | -2.67684900 | -0.59844400 |
| C | 0.41661400  | -3.17827700 | -1.77063400 |
| C | 0.99284900  | -4.58070300 | -1.75324900 |
| C | -0.07724300 | 1.44764200  | -1.00446500 |
| C | -0.42753700 | 2.58148300  | -0.31361200 |
| S | 0.32279000  | 1.91069100  | -2.63750600 |
| C | -0.37049200 | 3.79330800  | -1.07842200 |
| C | 0.02587300  | 3.59847300  | -2.37217700 |
| H | 0.15460600  | 4.33858600  | -3.15193300 |
| O | -0.84490600 | 2.59387000  | 1.00079200  |
| C | -0.67318800 | 3.88268100  | 1.58760300  |
| H | 0.40119000  | 4.08713400  | 1.72907000  |
| O | -0.65371400 | 5.02280600  | -0.55102800 |
| C | -1.30159000 | 4.94579200  | 0.72271400  |
| H | -1.20128700 | 5.93746400  | 1.17180200  |
| H | -2.37099100 | 4.72946400  | 0.57868400  |
| H | -1.15375600 | 3.84019600  | 2.56953100  |
| C | -5.84910500 | -0.04833400 | -0.24167000 |
| C | -4.94403900 | -1.05933200 | 0.20957700  |
| C | -7.12775200 | -0.50995600 | -0.39233800 |
| C | -5.55085900 | -2.26967900 | 0.40023000  |
| S | -7.23162200 | -2.18066500 | 0.02350600  |
| O | -5.45094700 | 1.22733900  | -0.51114900 |
| C | -4.17682900 | 1.52209700  | 0.07890500  |
| O | -3.61815500 | -0.81492500 | 0.43189800  |
| C | -3.17359800 | 0.42239600  | -0.17916900 |
| C | -2.88908700 | 0.18966500  | -1.64868700 |
| H | -8.00021200 | 0.04129500  | -0.71744600 |
| H | -3.84439900 | 2.46078100  | -0.37319900 |
| H | -4.29839200 | 1.67284400  | 1.16172100  |
| H | -2.23422900 | 0.65813600  | 0.33803800  |
| H | -3.80740400 | -0.09977400 | -2.18055500 |
| H | -2.51880500 | 1.12170200  | -2.09147300 |
| H | -5.10163900 | -3.19566400 | 0.73466000  |
| H | 2.08296400  | -4.50453000 | -1.63709100 |
| H | 0.62154700  | -5.16773000 | -0.90696100 |
| H | 0.79171000  | -5.10850600 | -2.69016600 |
| N | -1.84540200 | -0.83009200 | -1.79053800 |
| H | -2.19751900 | -1.73679600 | -1.48497800 |
| H | -1.56655800 | -0.95491800 | -2.76230200 |
| H | 4.72399200  | -1.10539300 | -0.25783400 |
| H | 5.85535500  | -3.27606900 | 0.11380000  |
| H | 3.96474600  | 0.95101200  | 2.17846900  |
| H | 3.95549900  | 2.04164400  | 4.39763400  |

---

|   |             |             |             |
|---|-------------|-------------|-------------|
| H | 3.03087900  | 2.62512600  | 0.80962700  |
| H | 4.37835300  | 4.06894800  | -0.66512300 |
| H | 1.78703800  | 2.32977800  | 5.60686300  |
| H | 5.17200500  | 3.19755900  | -2.86263700 |
| H | 4.67398500  | -5.08998000 | 1.34531100  |
| H | 4.53542500  | 0.93176900  | -3.59997300 |
| H | 2.41707700  | -4.70266300 | 2.27607600  |
| H | -0.29121400 | 1.44678900  | 4.65201400  |
| O | 1.10813600  | -2.33067300 | 2.07595400  |
| O | -0.45705500 | 0.10923300  | 2.32547900  |
| O | 2.96838100  | -0.73737900 | -2.15875500 |
| C | 0.25000500  | -3.36705400 | 2.51521400  |
| H | 0.09905700  | -4.10390600 | 1.71660000  |
| H | 0.64239100  | -3.85984700 | 3.41470000  |
| H | -0.69946500 | -2.88142500 | 2.75183900  |
| C | -1.68309000 | 0.25869200  | 3.02079400  |
| H | -1.97505400 | 1.31530200  | 3.08477700  |
| H | -2.42352000 | -0.29257900 | 2.43691300  |
| H | -1.62354400 | -0.16868500 | 4.03054900  |
| C | 3.28171000  | -1.21974600 | -3.45469300 |
| H | 4.36253800  | -1.37739200 | -3.56689900 |
| H | 2.74704200  | -2.16565300 | -3.54970900 |
| H | 2.93117900  | -0.52407900 | -4.22858500 |

(L7)Pd(EDOT)(OAc)(EDOT-NH<sub>2</sub>)

-----

M06-L electronic energy (Hartree): -3346.648208

M06-L thermal correction to free energy (Hartree): 0.487712

Three lowest frequencies (cm<sup>-1</sup>): 12.58, 15.18, 30.34

-----

|   |            |             |             |
|---|------------|-------------|-------------|
| C | 2.83810200 | -1.93124600 | 0.59070600  |
| C | 2.23563500 | -2.91894300 | 1.37412700  |
| C | 4.07570700 | -2.23726000 | 0.01410700  |
| C | 2.78857800 | -4.17449900 | 1.56006500  |
| C | 4.65650400 | -3.49019500 | 0.19135100  |
| C | 4.00837900 | -4.46040600 | 0.95223400  |
| C | 1.89290700 | 0.29150800  | 2.06775900  |
| C | 3.07911300 | 0.67150400  | 2.71650500  |
| C | 0.71433800 | 0.33961500  | 2.81648200  |
| C | 3.06962000 | 1.14703200  | 4.02162800  |
| C | 0.68088900 | 0.81407900  | 4.11986900  |
| C | 1.86454300 | 1.23065800  | 4.71808600  |
| C | 3.08507400 | 0.72982100  | -0.54963500 |
| C | 3.44276900 | 0.36619700  | -1.85016200 |

---

|    |             |             |             |
|----|-------------|-------------|-------------|
| C  | 3.49398800  | 1.99733300  | -0.11551300 |
| C  | 4.23643000  | 1.14968500  | -2.66961800 |
| C  | 4.27445200  | 2.81615100  | -0.92642200 |
| C  | 4.66166100  | 2.38619600  | -2.19369000 |
| P  | 1.94198100  | -0.35671400 | 0.36319900  |
| Pd | -0.02232600 | -0.55491600 | -0.73558600 |
| O  | -0.04807800 | -2.64613200 | -2.85769200 |
| O  | -0.03383700 | -2.69386300 | -0.60321300 |
| C  | 0.05621800  | -3.24137500 | -1.77091700 |
| C  | 0.35677600  | -4.72571300 | -1.73378700 |
| C  | 0.02743300  | 1.43268600  | -1.02339100 |
| C  | -0.16611200 | 2.54041500  | -0.23801700 |
| S  | 0.35483000  | 1.96633200  | -2.64917700 |
| C  | -0.06303300 | 3.79240800  | -0.92708700 |
| C  | 0.21842500  | 3.65174200  | -2.25750900 |
| H  | 0.35145200  | 4.42689500  | -3.00162200 |
| O  | -0.46807000 | 2.48306500  | 1.10390900  |
| C  | -0.18145800 | 3.71747600  | 1.76130800  |
| H  | 0.90943500  | 3.84443700  | 1.85434100  |
| O  | -0.20463100 | 4.99763000  | -0.29880100 |
| C  | -0.78559700 | 4.87307600  | 1.00425100  |
| H  | -0.59622700 | 5.82357800  | 1.50979000  |
| H  | -1.87272700 | 4.73229000  | 0.90903500  |
| H  | -0.61155900 | 3.63624400  | 2.76333500  |
| C  | -5.77001800 | 0.12125800  | 0.08708600  |
| C  | -4.83115600 | -0.88864800 | 0.46716600  |
| C  | -7.05364100 | -0.34582200 | 0.01859700  |
| C  | -5.41838200 | -2.10392800 | 0.68690400  |
| S  | -7.12154900 | -2.01998300 | 0.42722200  |
| O  | -5.39656200 | 1.40127600  | -0.19724900 |
| C  | -4.08718900 | 1.69790200  | 0.30983100  |
| O  | -3.49574400 | -0.63816000 | 0.60608800  |
| C  | -3.09815200 | 0.60379500  | -0.02304400 |
| C  | -2.92104600 | 0.39080200  | -1.51378400 |
| H  | -7.94817800 | 0.20326400  | -0.24427500 |
| H  | -3.79451800 | 2.64338200  | -0.15577400 |
| H  | -4.13777800 | 1.83836900  | 1.39865300  |
| H  | -2.12892600 | 0.83744500  | 0.43235300  |
| H  | -3.88545200 | 0.16223900  | -1.98977200 |
| H  | -2.53016300 | 1.31266000  | -1.96025200 |
| H  | -4.94314100 | -3.02951700 | 0.98478500  |
| H  | 1.44050900  | -4.86026300 | -1.62192300 |
| H  | -0.11632700 | -5.21522100 | -0.87686800 |
| H  | 0.05032400  | -5.21785500 | -2.66100000 |

---

|   |             |             |             |
|---|-------------|-------------|-------------|
| N | -1.95003000 | -0.68297400 | -1.75239500 |
| H | -2.33693000 | -1.57611000 | -1.44891100 |
| H | -1.74716500 | -0.79098700 | -2.74465000 |
| H | 4.60081300  | -1.48471400 | -0.56895200 |
| H | 5.62012800  | -3.70436100 | -0.26447700 |
| H | 4.02454600  | 0.59300500  | 2.18073100  |
| H | 4.00133600  | 1.44600700  | 4.49532800  |
| H | 3.18736600  | 2.35465500  | 0.86487500  |
| H | 4.58273800  | 3.79305900  | -0.56206500 |
| H | 1.84573400  | 1.60363200  | 5.73961600  |
| H | 5.28169100  | 3.01929300  | -2.82388300 |
| H | 4.45614400  | -5.44242200 | 1.08649200  |
| H | 4.49155400  | 0.79489900  | -3.66448800 |
| H | 2.26838300  | -4.90204800 | 2.17757800  |
| H | -0.26803700 | 0.83767400  | 4.64919900  |
| F | -0.43866700 | -0.11623500 | 2.29376000  |
| F | 2.96886200  | -0.80244100 | -2.34245100 |
| F | 1.08144600  | -2.62063800 | 2.00564000  |

(L8)Pd(EDOT)(OAc)(EDOT-NH<sub>2</sub>)

-----  
M06-L electronic energy (Hartree): -3346.656508

M06-L thermal correction to free energy (Hartree): 0.485844

Three lowest frequencies (cm<sup>-1</sup>): 14.75, 17.27, 25.74

-----

|   |             |             |             |
|---|-------------|-------------|-------------|
| C | 2.99802400  | -1.69198300 | -0.40708300 |
| C | 2.65262500  | -3.05047100 | -0.31828700 |
| C | 4.23747600  | -1.34266800 | -0.95630800 |
| C | 3.52423500  | -4.03659600 | -0.75969700 |
| C | 5.11756500  | -2.32153000 | -1.40799500 |
| C | 4.74515300  | -3.65256500 | -1.30005400 |
| C | 1.42981600  | -0.95687100 | 1.88332300  |
| C | 2.37912300  | -1.61879500 | 2.67398300  |
| C | 0.18048900  | -0.64273900 | 2.43526100  |
| C | 2.09225100  | -1.95812600 | 3.99138800  |
| C | -0.12040500 | -0.97652300 | 3.75061300  |
| C | 0.84502900  | -1.62939300 | 4.50492300  |
| C | 2.76013800  | 1.09131000  | 0.31534600  |
| C | 3.02892700  | 1.82421200  | -0.85026100 |
| C | 3.21519600  | 1.57915700  | 1.54459000  |
| C | 3.74157000  | 3.01511400  | -0.79679300 |
| C | 3.92510000  | 2.77526700  | 1.61521900  |
| C | 4.17377700  | 3.47180800  | 0.44178600  |
| P | 1.79590700  | -0.44670800 | 0.17510300  |

---

|    |             |             |             |
|----|-------------|-------------|-------------|
| Pd | -0.14362400 | -0.43075200 | -1.00871900 |
| O  | -0.38052700 | -2.71058700 | -2.81198700 |
| O  | -0.45087600 | -2.52296100 | -0.57357900 |
| C  | -0.49950300 | -3.19978000 | -1.67503700 |
| C  | -0.68702300 | -4.69151800 | -1.49801000 |
| C  | -0.03337200 | 1.53294800  | -1.32565100 |
| C  | -0.12136000 | 2.53796600  | -0.39947700 |
| S  | 0.01251600  | 2.24839600  | -2.91277500 |
| C  | -0.15251000 | 3.85956100  | -0.94286300 |
| C  | -0.08491000 | 3.87440800  | -2.30979100 |
| H  | -0.07978000 | 4.73048800  | -2.97271300 |
| O  | -0.18073800 | 2.30286100  | 0.95657700  |
| C  | 0.16196300  | 3.47450600  | 1.70141300  |
| H  | 1.24674300  | 3.65064600  | 1.62634600  |
| O  | -0.22451300 | 4.97756300  | -0.16183000 |
| C  | -0.60018300 | 4.67023500  | 1.18690500  |
| H  | -0.37669500 | 5.56530300  | 1.77254100  |
| H  | -1.68301100 | 4.47655900  | 1.23040700  |
| H  | -0.09187800 | 3.25883200  | 2.74295300  |
| C  | -5.78284800 | 0.24787900  | 0.18721800  |
| C  | -4.82089900 | -0.78021500 | 0.43741300  |
| C  | -7.06662000 | -0.22285300 | 0.15796000  |
| C  | -5.38942000 | -2.01342500 | 0.59770700  |
| S  | -7.10474200 | -1.92342600 | 0.44110100  |
| O  | -5.43010300 | 1.54780100  | -0.02669200 |
| C  | -4.09258000 | 1.81563000  | 0.41777700  |
| O  | -3.47967200 | -0.53015000 | 0.51707300  |
| C  | -3.12694500 | 0.75154000  | -0.05381200 |
| C  | -3.05332200 | 0.64106400  | -1.56428000 |
| H  | -7.97717200 | 0.33619000  | -0.01381300 |
| H  | -3.82692700 | 2.79313600  | 0.00468300  |
| H  | -4.07529300 | 1.87675500  | 1.51478700  |
| H  | -2.12787100 | 0.96235200  | 0.34704900  |
| H  | -4.05309300 | 0.47092200  | -1.98876600 |
| H  | -2.66834100 | 1.58339900  | -1.97053200 |
| H  | -4.89448700 | -2.95533000 | 0.79559300  |
| H  | 0.29523600  | -5.16760800 | -1.38344600 |
| H  | -1.26911500 | -4.92704100 | -0.60233200 |
| H  | -1.16447100 | -5.13201600 | -2.37769400 |
| N  | -2.13151100 | -0.43739700 | -1.94548400 |
| H  | -2.52925200 | -1.33692000 | -1.67544200 |
| H  | -2.01876900 | -0.47092700 | -2.95694600 |
| H  | 4.53401700  | -0.29804500 | -1.02618100 |
| H  | 6.08392500  | -2.06151100 | -1.83118000 |

---

|   |             |             |             |
|---|-------------|-------------|-------------|
| H | 3.27125400  | -5.09118200 | -0.68917400 |
| H | 1.68836800  | -3.33392700 | 0.09985700  |
| H | 3.35484200  | -1.87107200 | 2.26052300  |
| H | 2.81768200  | -2.47017800 | 4.61749300  |
| H | -1.08680400 | -0.74532700 | 4.19036800  |
| H | -0.55898900 | -0.12380700 | 1.82500000  |
| H | 3.00764200  | 1.03591700  | 2.46481900  |
| H | 4.27944600  | 3.16848000  | 2.56402200  |
| H | 3.95286200  | 3.59229600  | -1.69297300 |
| H | 2.65952400  | 1.46841700  | -1.81143000 |
| F | 5.59476400  | -4.60427700 | -1.72578600 |
| F | 4.85085500  | 4.63195000  | 0.50620600  |
| F | 0.56180400  | -1.95910200 | 5.77678600  |

(L9)Pd(EDOT)(OAc)(EDOT-NH<sub>2</sub>)

-----

M06-L electronic energy (Hartree): -3346.653773

M06-L thermal correction to free energy (Hartree): 0.487806

Three lowest frequencies (cm<sup>-1</sup>): 15.95, 21.28, 25.48

-----

|    |             |             |             |
|----|-------------|-------------|-------------|
| C  | -2.53406200 | 2.04438500  | 0.78310800  |
| C  | -1.65259400 | 2.83859800  | 1.52607700  |
| C  | -3.77428500 | 2.56029600  | 0.39582000  |
| C  | -2.02662100 | 4.13448000  | 1.84031500  |
| C  | -4.12327100 | 3.86632700  | 0.73470800  |
| C  | -3.24745600 | 4.67146600  | 1.45589300  |
| C  | -2.04530700 | -0.48148500 | 1.98137700  |
| C  | -3.19575000 | -0.43138900 | 2.78282000  |
| C  | -0.89815900 | -1.12227700 | 2.45053900  |
| C  | -3.19779900 | -1.04148800 | 4.03310100  |
| C  | -0.93009600 | -1.71358300 | 3.70457100  |
| C  | -2.05945300 | -1.69187900 | 4.50811200  |
| C  | -3.32258800 | -0.34613900 | -0.65165900 |
| C  | -3.49630500 | 0.21579400  | -1.92428100 |
| C  | -4.08710600 | -1.44846700 | -0.26080000 |
| C  | -4.45083100 | -0.33205000 | -2.76298100 |
| C  | -5.03391400 | -1.97973200 | -1.13587800 |
| C  | -5.22685900 | -1.42477000 | -2.39675100 |
| P  | -1.98365700 | 0.35298000  | 0.36167300  |
| Pd | 0.01786500  | 0.24303400  | -0.71577600 |
| O  | -1.29911500 | 2.60091900  | -2.07113300 |
| O  | 0.41348200  | 2.34138000  | -0.63380800 |
| C  | -0.39972900 | 3.05345800  | -1.34260300 |
| C  | -0.17393900 | 4.54766500  | -1.23806900 |

---

|   |             |             |             |
|---|-------------|-------------|-------------|
| C | -0.17445300 | -1.75514100 | -0.89993400 |
| C | 0.47731700  | -2.79976900 | -0.28755600 |
| S | -1.06342800 | -2.39771500 | -2.25657700 |
| C | 0.25421400  | -4.08294700 | -0.88056100 |
| C | -0.56608700 | -4.03198500 | -1.97342900 |
| H | -0.91264700 | -4.85241100 | -2.58949400 |
| O | 1.32429500  | -2.65336400 | 0.79411500  |
| C | 1.47996200  | -3.88684900 | 1.50297300  |
| H | 0.54488600  | -4.13111500 | 2.02966500  |
| O | 0.79012500  | -5.23786000 | -0.38327500 |
| C | 1.84909300  | -4.99288700 | 0.54721100  |
| H | 2.01220900  | -5.93663800 | 1.07391000  |
| H | 2.76621800  | -4.72850000 | -0.00174000 |
| H | 2.26705400  | -3.71782700 | 2.24288100  |
| C | 5.88079400  | 0.30710500  | -0.04922600 |
| C | 4.89790700  | 1.34471300  | -0.01024100 |
| C | 7.12966600  | 0.76968200  | -0.35929400 |
| C | 5.41695900  | 2.57907600  | -0.28607400 |
| S | 7.11007300  | 2.47779100  | -0.59855100 |
| O | 5.57121500  | -1.00201200 | 0.17540300  |
| C | 4.31145300  | -1.14007800 | 0.84686600  |
| O | 3.58629000  | 1.10698800  | 0.28701200  |
| C | 3.24012800  | -0.29392500 | 0.19588900  |
| C | 2.98552800  | -0.66781500 | -1.25029600 |
| H | 8.04590800  | 0.20197400  | -0.45472000 |
| H | 4.05323300  | -2.19998200 | 0.78858900  |
| H | 4.42481000  | -0.85548100 | 1.90208100  |
| H | 2.30481800  | -0.38447400 | 0.76209800  |
| H | 3.90688000  | -0.56480800 | -1.84124200 |
| H | 2.66535000  | -1.71432700 | -1.30115000 |
| H | 4.89730500  | 3.52761600  | -0.32242900 |
| H | 0.08507000  | 4.83802800  | -0.21424300 |
| H | 0.66531700  | 4.84226600  | -1.87986000 |
| H | -1.06018100 | 5.10010100  | -1.56301100 |
| N | 1.91398900  | 0.17168000  | -1.80376300 |
| H | 2.21327500  | 1.14774600  | -1.81280400 |
| H | 1.73883900  | -0.09051900 | -2.77234800 |
| H | -4.46914700 | 1.94904500  | -0.17495900 |
| H | -5.08852000 | 4.26342100  | 0.42836100  |
| H | -0.67284200 | 2.47300900  | 1.82636500  |
| H | -4.08774600 | 0.08452800  | 2.42856400  |
| H | -4.09219800 | -1.00932900 | 4.65082600  |
| H | 0.00835400  | -1.17150800 | 1.85112600  |
| H | -3.94025500 | -1.90192600 | 0.71700300  |

---

|   |             |             |             |
|---|-------------|-------------|-------------|
| H | -5.62716900 | -2.83951000 | -0.83287000 |
| H | -2.88391500 | 1.05784300  | -2.24978000 |
| H | -2.04027000 | -2.16856900 | 5.48458500  |
| H | -5.95891300 | -1.82584800 | -3.09255400 |
| H | -3.49376600 | 5.69660200  | 1.71823100  |
| F | 0.18345100  | -2.32911200 | 4.15224100  |
| F | -4.62638200 | 0.20734400  | -3.98544500 |
| F | -1.15836000 | 4.91006000  | 2.52019200  |

(L10)Pd(EDOT)(OAc)(EDOT-NH<sub>2</sub>)

-----

M06-L electronic energy (Hartree): -5071.515794

M06-L thermal correction to free energy (Hartree): 0.504936

Three lowest frequencies (cm<sup>-1</sup>): 9.71, 11.62, 14.67

-----

|    |             |             |             |
|----|-------------|-------------|-------------|
| C  | -1.78608500 | 1.87911700  | 0.28205800  |
| C  | -1.01132400 | 3.00633200  | 0.58872600  |
| C  | -3.17016800 | 2.00245800  | 0.19965000  |
| C  | -1.61962300 | 4.24089600  | 0.76301300  |
| C  | -3.77302400 | 3.24754900  | 0.39318100  |
| C  | -3.00562300 | 4.37122800  | 0.66271800  |
| C  | -0.39212000 | -0.14250200 | 1.69901400  |
| C  | -1.31349900 | -0.52639900 | 2.67485000  |
| C  | 0.96050600  | -0.04737800 | 2.03194000  |
| C  | -0.87408300 | -0.84317700 | 3.96009500  |
| C  | 1.39078700  | -0.36402700 | 3.31425200  |
| C  | 0.47667000  | -0.76954800 | 4.28428200  |
| C  | -2.10286600 | -0.91362500 | -0.54321100 |
| C  | -2.85074600 | -0.63730800 | -1.68922900 |
| C  | -2.09123200 | -2.21127100 | -0.02251300 |
| C  | -3.60386600 | -1.64641000 | -2.28679400 |
| C  | -2.82306200 | -3.21480500 | -0.64450300 |
| C  | -3.59028800 | -2.93791400 | -1.77509400 |
| P  | -0.88560800 | 0.31430300  | 0.00297600  |
| Pd | 0.87259000  | 0.38194300  | -1.42698900 |
| O  | -1.10760800 | 2.10459500  | -2.74534600 |
| O  | 0.85963500  | 2.49356200  | -1.72271600 |
| C  | -0.20806100 | 2.86849500  | -2.35290000 |
| C  | -0.31726900 | 4.35774400  | -2.59762400 |
| C  | 0.87350700  | -1.63513900 | -1.34115500 |
| C  | 1.31770200  | -2.59393600 | -0.46202300 |
| S  | 0.10644300  | -2.43852100 | -2.68373900 |
| C  | 1.02509100  | -3.94274400 | -0.84656000 |

---

|   |             |             |             |
|---|-------------|-------------|-------------|
| C | 0.35587400  | -4.02634400 | -2.03610300 |
| H | 0.02283300  | -4.91624400 | -2.55546900 |
| O | 2.02172600  | -2.31983300 | 0.68813700  |
| C | 1.94331700  | -3.39870700 | 1.62334300  |
| H | 0.92651400  | -3.44755700 | 2.04705200  |
| O | 1.35881400  | -5.02168500 | -0.08082900 |
| C | 2.29803200  | -4.70098800 | 0.95166500  |
| H | 2.26420400  | -5.53410100 | 1.65804500  |
| H | 3.30877700  | -4.64080000 | 0.52162900  |
| H | 2.65015300  | -3.16025300 | 2.42344900  |
| C | 6.69029200  | 0.20959300  | -1.14194500 |
| C | 5.73191200  | 1.24734400  | -0.91975300 |
| C | 7.93406900  | 0.69207300  | -1.44325600 |
| C | 6.26450700  | 2.50001200  | -1.05077500 |
| S | 7.93986400  | 2.41614900  | -1.45041100 |
| O | 6.36738100  | -1.11400900 | -1.08146200 |
| C | 5.13300200  | -1.32529700 | -0.38288300 |
| O | 4.42858400  | 0.99113700  | -0.59761600 |
| C | 4.05488500  | -0.38015200 | -0.86208900 |
| C | 3.71593500  | -0.54987100 | -2.32965000 |
| H | 8.83290300  | 0.12860400  | -1.65560200 |
| H | 4.85012300  | -2.36385900 | -0.57477100 |
| H | 5.29134000  | -1.19506200 | 0.69677400  |
| H | 3.15159600  | -0.53817200 | -0.26215700 |
| H | 4.60399500  | -0.38448800 | -2.95575700 |
| H | 3.36362200  | -1.57328400 | -2.49977000 |
| H | 5.76408100  | 3.45232800  | -0.93493000 |
| H | 0.38025600  | 4.93214400  | -1.98146400 |
| H | -0.10503500 | 4.57548400  | -3.65096700 |
| H | -1.34122000 | 4.69392800  | -2.40107200 |
| N | 2.63443100  | 0.37360000  | -2.70798900 |
| H | 2.97424300  | 1.33540200  | -2.67571100 |
| H | 2.35879200  | 0.20182700  | -3.67381800 |
| H | -3.79508400 | 1.13756000  | -0.01648600 |
| H | -2.37627300 | -0.59236300 | 2.44019500  |
| H | -1.47943000 | -2.45678200 | 0.84179700  |
| H | 0.81460200  | -1.03330900 | 5.28290200  |
| H | -4.15446300 | -3.72795100 | -2.26389800 |
| H | -3.47778100 | 5.34170300  | 0.79084100  |
| H | -2.80643200 | 0.35334400  | -2.14338400 |
| H | 0.07063600  | 2.92455000  | 0.65482200  |
| H | 1.67804900  | 0.25276600  | 1.27027800  |
| C | -5.26567400 | 3.33376000  | 0.29167000  |
| C | -0.80265500 | 5.46627400  | 1.03876800  |

---

|   |             |             |             |
|---|-------------|-------------|-------------|
| C | -1.89156000 | -1.27558700 | 4.97243600  |
| C | 2.84620200  | -0.28022200 | 3.65948500  |
| C | -2.79751300 | -4.61451300 | -0.11015400 |
| C | -4.33445500 | -1.32961200 | -3.55472600 |
| F | -2.63425800 | -5.51649900 | -1.10001900 |
| F | -3.95657700 | -4.92910000 | 0.50947700  |
| F | -1.80620800 | -4.80429800 | 0.77985700  |
| F | -3.46909700 | -1.15956900 | -4.58071400 |
| F | -5.19013500 | -2.30290000 | -3.91314600 |
| F | -5.03787100 | -0.18394000 | -3.45213500 |
| F | -1.34110400 | -1.55863800 | 6.16526400  |
| F | -2.82260900 | -0.31886000 | 5.17049400  |
| F | -2.55510300 | -2.37639700 | 4.55952600  |
| F | 3.24246000  | -1.34920600 | 4.38314000  |
| F | 3.62221800  | -0.23072200 | 2.55770700  |
| F | 3.12720900  | 0.81313400  | 4.39606900  |
| F | 0.51875900  | 5.23471100  | 0.93155900  |
| F | -1.02991800 | 5.94943400  | 2.27771400  |
| F | -1.10935600 | 6.45835800  | 0.17530000  |
| F | -5.72217700 | 4.58434600  | 0.47599200  |
| F | -5.86504900 | 2.54353400  | 1.20770800  |
| F | -5.70020400 | 2.91671300  | -0.91645700 |

(L11)Pd(EDOT)(OAc)(EDOT-NH<sub>2</sub>)

-----  
M06-L electronic energy (Hartree): -4537.620290

M06-L thermal correction to free energy (Hartree): 0.378402

Three lowest frequencies (cm<sup>-1</sup>): 15.01 18.46, 25.02

-----

|   |             |             |             |
|---|-------------|-------------|-------------|
| C | -2.31782500 | 1.78597200  | 0.40960200  |
| C | -1.65746300 | 2.82162100  | 1.07896000  |
| C | -3.62517800 | 2.04026100  | -0.00576800 |
| C | -2.22952900 | 4.06818500  | 1.27540800  |
| C | -4.22095900 | 3.28254500  | 0.17936900  |
| C | -3.51950400 | 4.30002200  | 0.81315100  |
| C | -1.22339800 | -0.35606700 | 1.85520100  |
| C | -2.34804600 | -0.84584200 | 2.52466400  |
| C | -0.03129200 | -0.28003800 | 2.57942200  |
| C | -2.28483200 | -1.31705300 | 3.82566100  |
| C | 0.05787200  | -0.76026800 | 3.87997000  |
| C | -1.06902000 | -1.28046800 | 4.50150700  |
| C | -2.32272100 | -0.88528300 | -0.84178600 |
| C | -2.69145100 | -0.44318800 | -2.11489800 |
| C | -2.47950500 | -2.24742800 | -0.58712800 |

---

|    |             |             |             |
|----|-------------|-------------|-------------|
| C  | -3.24681600 | -1.27961900 | -3.06724800 |
| C  | -3.02303300 | -3.11243600 | -1.53022400 |
| C  | -3.41580700 | -2.62702100 | -2.76964900 |
| P  | -1.32585400 | 0.27119600  | 0.15059200  |
| F  | -0.44099600 | 2.59878200  | 1.58758000  |
| F  | 1.06131400  | 0.28685300  | 2.06886800  |
| F  | -2.47507800 | 0.83790700  | -2.45182700 |
| F  | -3.36798400 | -1.79519600 | 4.43547100  |
| F  | -0.99250300 | -1.73419600 | 5.74651400  |
| F  | 1.22109800  | -0.72318100 | 4.53098800  |
| F  | -3.53009700 | -0.87542300 | 1.89836300  |
| F  | -2.08049300 | -2.79388500 | 0.56671300  |
| F  | -3.15311200 | -4.40883100 | -1.24951200 |
| F  | -3.93866400 | -3.44558200 | -3.67598500 |
| F  | -3.59283200 | -0.81040100 | -4.26470400 |
| F  | -4.37282200 | 1.09488600  | -0.58199200 |
| F  | -5.47161700 | 3.49356800  | -0.23073700 |
| F  | -4.08801000 | 5.48627200  | 0.99708800  |
| F  | -1.56260100 | 5.03106800  | 1.91092900  |
| Pd | 0.62466700  | 0.56795300  | -0.93318000 |
| O  | 0.47587200  | 2.40875400  | -3.24771500 |
| O  | 0.40956200  | 2.69052100  | -1.01283300 |
| C  | 0.26955500  | 3.09733700  | -2.23497400 |
| C  | -0.23520100 | 4.51883700  | -2.35543400 |
| C  | 0.74969200  | -1.44450500 | -1.02096900 |
| C  | 1.04249800  | -2.45505200 | -0.13936600 |
| S  | 0.43785500  | -2.15202800 | -2.58434600 |
| C  | 1.00970100  | -3.77204800 | -0.70363700 |
| C  | 0.68989600  | -3.77746900 | -2.03290700 |
| H  | 0.60188200  | -4.62813600 | -2.69721500 |
| O  | 1.37400600  | -2.25435200 | 1.18062400  |
| C  | 1.16933900  | -3.43654200 | 1.96125300  |
| H  | 0.08854500  | -3.61280100 | 2.08002800  |
| O  | 1.24254400  | -4.89891500 | 0.02980300  |
| C  | 1.83222400  | -4.62027600 | 1.30540300  |
| H  | 1.70436700  | -5.52798300 | 1.90002000  |
| H  | 2.90738200  | -4.42692900 | 1.17750300  |
| H  | 1.60680300  | -3.23008500 | 2.94240100  |
| C  | 6.47610500  | 0.25485600  | -0.22161200 |
| C  | 5.50773100  | 1.24231800  | 0.14309200  |
| C  | 7.73421700  | 0.77195500  | -0.36371700 |
| C  | 6.04738200  | 2.49166900  | 0.27698600  |
| S  | 7.74128900  | 2.46686000  | -0.04641700 |
| O  | 6.14900200  | -1.05270900 | -0.42843200 |

---

|   |             |             |             |
|---|-------------|-------------|-------------|
| C | 4.87703600  | -1.37925300 | 0.14840000  |
| O | 4.19011100  | 0.94246800  | 0.34600700  |
| C | 3.82670500  | -0.34812900 | -0.19827300 |
| C | 3.57894300  | -0.22643500 | -1.68895100 |
| H | 8.64211700  | 0.24834300  | -0.63302400 |
| H | 4.60818900  | -2.35986200 | -0.25475100 |
| H | 4.97704000  | -1.45850600 | 1.23998400  |
| H | 2.89203600  | -0.60132600 | 0.31361200  |
| H | 4.50613800  | 0.04062700  | -2.21563000 |
| H | 3.23404100  | -1.19170500 | -2.07653000 |
| H | 5.54176100  | 3.41064700  | 0.54361000  |
| H | -1.33023600 | 4.50796100  | -2.27042800 |
| H | 0.14500100  | 5.15632300  | -1.55130200 |
| H | 0.02087800  | 4.94995200  | -3.32703100 |
| N | 2.53336100  | 0.77187000  | -1.94508800 |
| H | 2.86716900  | 1.69827600  | -1.67788200 |
| H | 2.30705700  | 0.83417100  | -2.93663800 |

(L4)Pd(Ph)(OAc)(EDOT-NH<sub>2</sub>)

-----  
M06-L electronic energy (Hartree): -2500.237302

M06-L thermal correction to free energy (Hartree): 0.505980

Three lowest frequencies (cm<sup>-1</sup>): 17.72, 19.58, 28.72

-----

|    |             |             |             |
|----|-------------|-------------|-------------|
| C  | -2.91265900 | 1.77716200  | 0.32291600  |
| C  | -2.25994500 | 2.82270700  | 0.99171100  |
| C  | -4.17236200 | 2.00668900  | -0.23871300 |
| C  | -2.85945700 | 4.07278500  | 1.09915400  |
| C  | -4.76567400 | 3.26400300  | -0.13697100 |
| C  | -4.11326000 | 4.29721600  | 0.53077800  |
| C  | -2.19366000 | -0.32270500 | 2.05710700  |
| C  | -3.44207200 | -0.51093200 | 2.66662600  |
| C  | -1.03507700 | -0.38211000 | 2.83819300  |
| C  | -3.52335500 | -0.78138500 | 4.02801200  |
| C  | -1.11844700 | -0.64517200 | 4.20405700  |
| C  | -2.36142800 | -0.84984800 | 4.79758800  |
| C  | -3.14961500 | -0.97025100 | -0.63823900 |
| C  | -3.38566300 | -0.66127800 | -1.98702600 |
| C  | -3.61081300 | -2.18582800 | -0.12219300 |
| C  | -4.10253400 | -1.54143400 | -2.79066900 |
| C  | -4.32202800 | -3.06671700 | -0.93455000 |
| C  | -4.57272600 | -2.74531000 | -2.26619600 |
| P  | -2.07055700 | 0.15295500  | 0.30075800  |
| Pd | 0.01319100  | 0.18181400  | -0.57938500 |

---

|   |             |             |             |
|---|-------------|-------------|-------------|
| O | -1.22108600 | 1.96569900  | -2.53614300 |
| O | 0.17196300  | 2.33756800  | -0.80890100 |
| C | -0.57213800 | 2.72302500  | -1.78822900 |
| C | -0.67302400 | 4.22187000  | -1.98313200 |
| C | 5.88849000  | -0.37650300 | 0.34326500  |
| C | 5.04819700  | 0.77718900  | 0.43584500  |
| C | 7.20182500  | -0.06159200 | 0.13069700  |
| C | 5.73845400  | 1.94942600  | 0.29726100  |
| S | 7.41830900  | 1.64719200  | 0.04855800  |
| O | 5.40151100  | -1.64745800 | 0.43490400  |
| C | 4.10376700  | -1.66933000 | 1.04338400  |
| O | 3.70182800  | 0.69309800  | 0.65535600  |
| C | 3.18834000  | -0.63896700 | 0.42112200  |
| C | 2.96932100  | -0.84645500 | -1.06319500 |
| H | 8.03910000  | -0.73826800 | 0.02176200  |
| H | 3.71485800  | -2.67981200 | 0.89085000  |
| H | 4.20045800  | -1.48256100 | 2.12177900  |
| H | 2.21563500  | -0.64789200 | 0.93117700  |
| H | 3.92243200  | -0.76715400 | -1.60518100 |
| H | 2.56456300  | -1.85097800 | -1.23316300 |
| H | 5.35003800  | 2.95898200  | 0.32783000  |
| H | -1.63126300 | 4.56208600  | -1.56913800 |
| H | 0.12681500  | 4.76560300  | -1.47229000 |
| H | -0.67181000 | 4.47847600  | -3.04721600 |
| N | 1.99005500  | 0.13097200  | -1.55537000 |
| H | 2.35877700  | 1.07616200  | -1.44571700 |
| H | 1.84513800  | -0.00118800 | -2.55515500 |
| H | -4.69941400 | 1.20377700  | -0.75070200 |
| H | -5.74723600 | 3.43066500  | -0.57662000 |
| H | -4.35335800 | -0.44220300 | 2.07168100  |
| H | -4.49596600 | -0.93107400 | 4.49227400  |
| H | -3.40539000 | -2.45598400 | 0.91242300  |
| H | -4.67746900 | -4.00952200 | -0.52330200 |
| H | -2.42770000 | -1.05698100 | 5.86391400  |
| H | -5.12910800 | -3.43501200 | -2.89810300 |
| H | -4.58124000 | 5.27651000  | 0.61096500  |
| H | -4.28714300 | -1.29108800 | -3.83372400 |
| H | -2.34296700 | 4.87609800  | 1.62105600  |
| H | -0.21156000 | -0.68702400 | 4.80378700  |
| C | -0.01810400 | -1.83427000 | -0.54088100 |
| C | 0.30642900  | -2.64474600 | 0.55411600  |
| C | -0.28230900 | -2.46104300 | -1.76886700 |
| C | 0.37778500  | -4.03507900 | 0.42361500  |
| H | 0.51172000  | -2.20136500 | 1.52958600  |

---

|   |             |             |             |
|---|-------------|-------------|-------------|
| C | -0.21275000 | -3.84780300 | -1.90123500 |
| H | -0.55263500 | -1.85866700 | -2.63918400 |
| C | 0.11836200  | -4.64131200 | -0.80283100 |
| H | 0.63791200  | -4.64295700 | 1.29012400  |
| H | -0.41849500 | -4.30982500 | -2.86692200 |
| H | 0.17149000  | -5.72412800 | -0.90304900 |
| H | -2.98283900 | 0.26489900  | -2.40091000 |
| H | -1.27295100 | 2.65432000  | 1.42136500  |
| H | -0.06712000 | -0.20679500 | 2.36395000  |

(L5)Pd(Ph)(OAc)(EDOT-NH<sub>2</sub>)

-----

M06-L electronic energy (Hartree): -2618.199555

M06-L thermal correction to free energy (Hartree): 0.588504

Three lowest frequencies (cm<sup>-1</sup>): 15.81, 20.84, 33.10

-----

|    |             |             |             |
|----|-------------|-------------|-------------|
| C  | 3.09741900  | -1.53440000 | -0.17003700 |
| C  | 2.77252000  | -2.85902700 | 0.20056400  |
| C  | 4.26341500  | -1.29190800 | -0.90837600 |
| C  | 3.61713400  | -3.88985800 | -0.22405900 |
| C  | 5.09166400  | -2.33381300 | -1.31323200 |
| C  | 4.75995200  | -3.64251300 | -0.97739100 |
| C  | 2.06937400  | -0.29336200 | 2.15716100  |
| C  | 3.35920000  | -0.39552100 | 2.70720700  |
| C  | 0.94465200  | -0.42519600 | 3.00308600  |
| C  | 3.56153000  | -0.58433100 | 4.06739400  |
| C  | 1.17729800  | -0.60851000 | 4.37402900  |
| C  | 2.45680000  | -0.68440200 | 4.90849600  |
| C  | 2.93240000  | 1.38949200  | -0.09268600 |
| C  | 3.01482200  | 1.80307600  | -1.44567600 |
| C  | 3.42191900  | 2.23139300  | 0.91279400  |
| C  | 3.59436500  | 3.04554100  | -1.72093600 |
| C  | 3.99285000  | 3.46382600  | 0.61148500  |
| C  | 4.07437400  | 3.87597700  | -0.71344700 |
| P  | 2.00493300  | -0.13966100 | 0.32326400  |
| Pd | -0.05191200 | -0.12311600 | -0.67007300 |
| O  | -0.11804800 | -1.34453800 | -3.41040500 |
| O  | 0.08724300  | -2.19607700 | -1.33061200 |
| C  | 0.16527500  | -2.26328300 | -2.61552300 |
| C  | 0.69851900  | -3.57970000 | -3.14475500 |
| C  | -6.01333300 | 0.27772300  | 0.24331400  |
| C  | -5.03722900 | -0.69031100 | 0.63992600  |
| C  | -7.27255400 | -0.24681500 | 0.14647700  |
| C  | -5.57334000 | -1.93193900 | 0.84329400  |

---

|   |             |             |             |
|---|-------------|-------------|-------------|
| S | -7.27235600 | -1.92408900 | 0.54667400  |
| O | -5.69192600 | 1.57519400  | -0.02767300 |
| C | -4.41519900 | 1.92574000  | 0.52426200  |
| O | -3.71680300 | -0.38109800 | 0.80663000  |
| C | -3.36867900 | 0.88463400  | 0.19729900  |
| C | -3.15370700 | 0.69776900  | -1.29068500 |
| H | -8.18589500 | 0.26257500  | -0.13160900 |
| H | -4.15103000 | 2.89319500  | 0.08795600  |
| H | -4.50584300 | 2.03866700  | 1.61323700  |
| H | -2.41634500 | 1.16100500  | 0.66643300  |
| H | -4.08772700 | 0.37453700  | -1.77324500 |
| H | -2.86837400 | 1.65754500  | -1.73334700 |
| H | -5.06221400 | -2.83665700 | 1.14568700  |
| H | 1.79425700  | -3.51758300 | -3.18887200 |
| H | 0.44917500  | -4.41737600 | -2.48554800 |
| H | 0.33632300  | -3.78071900 | -4.15731400 |
| N | -2.07825100 | -0.26777300 | -1.52624400 |
| H | -2.37544000 | -1.18874900 | -1.20396300 |
| H | -1.86758500 | -0.37961600 | -2.51999600 |
| H | 4.53823000  | -0.26904100 | -1.15955000 |
| H | 5.99140000  | -2.11779200 | -1.88571000 |
| H | 4.22292500  | -0.33065200 | 2.04463500  |
| H | 4.57208000  | -0.65743400 | 4.46347300  |
| H | 3.33454400  | 1.93613500  | 1.95547600  |
| H | 4.35994700  | 4.09999400  | 1.41443400  |
| H | 2.59020500  | -0.83362200 | 5.97822900  |
| H | 4.51074900  | 4.84066500  | -0.96606400 |
| H | 5.39304900  | -4.47002900 | -1.29228900 |
| H | 3.65941300  | 3.36586400  | -2.76070100 |
| H | 3.36465700  | -4.91330100 | 0.05372500  |
| H | 0.31537100  | -0.71023100 | 5.03265300  |
| C | -0.16883500 | 1.87792700  | -0.37084900 |
| C | 0.10825000  | 2.59585900  | 0.80045000  |
| C | -0.52447800 | 2.61884000  | -1.51036700 |
| C | 0.02127600  | 3.98841500  | 0.83884700  |
| H | 0.44184900  | 2.07755000  | 1.70221000  |
| C | -0.61023300 | 4.01179500  | -1.47912600 |
| H | -0.72963400 | 2.10283700  | -2.45200500 |
| C | -0.33974800 | 4.70395400  | -0.30026500 |
| H | 0.25220200  | 4.51485300  | 1.76523800  |
| H | -0.88571800 | 4.55491100  | -2.38305700 |
| H | -0.40231500 | 5.79044800  | -0.27220700 |
| C | 1.60872100  | -3.20092400 | 1.07842200  |
| H | 1.88720400  | -3.14680600 | 2.14075700  |

---

|   |             |             |             |
|---|-------------|-------------|-------------|
| H | 0.75955200  | -2.52955200 | 0.91905400  |
| H | 1.26197400  | -4.22134000 | 0.88118700  |
| C | -0.48107100 | -0.45382400 | 2.53802900  |
| H | -0.76396000 | 0.43019900  | 1.95746600  |
| H | -0.68216400 | -1.31647400 | 1.88694900  |
| H | -1.16045800 | -0.52581300 | 3.39445900  |
| C | 2.47156200  | 0.99983800  | -2.58806300 |
| H | 1.37228000  | 1.01063900  | -2.59282700 |
| H | 2.81495500  | 1.40721500  | -3.54530600 |
| H | 2.75673300  | -0.05874500 | -2.55421100 |

(L6)Pd(Ph)(OAc)(EDOT-NH<sub>2</sub>)

-----

M06-L electronic energy (Hartree): -2843.870684

M06-L thermal correction to free energy (Hartree): 0.599987

Three lowest frequencies (cm<sup>-1</sup>): 18.86, 20.63, 29.77

-----

|    |             |             |             |
|----|-------------|-------------|-------------|
| C  | 2.94477300  | -1.54157500 | 0.27212900  |
| C  | 2.36438600  | -2.74031800 | 0.73094300  |
| C  | 4.19635300  | -1.58923200 | -0.34137900 |
| C  | 3.00179400  | -3.96321900 | 0.51327100  |
| C  | 4.85129100  | -2.80398500 | -0.53555800 |
| C  | 4.24188100  | -3.98540600 | -0.12167300 |
| C  | 1.94368200  | 0.20457200  | 2.26405100  |
| C  | 3.17459000  | 0.37717300  | 2.90847800  |
| C  | 0.77994500  | 0.10066400  | 3.05600000  |
| C  | 3.26887500  | 0.51045800  | 4.28925100  |
| C  | 0.87016200  | 0.25202500  | 4.44550000  |
| C  | 2.10516100  | 0.46011200  | 5.05070400  |
| C  | 2.98220400  | 1.32179600  | -0.21355400 |
| C  | 3.24054800  | 1.31501700  | -1.60411500 |
| C  | 3.35874800  | 2.44823900  | 0.52104100  |
| C  | 3.92150100  | 2.37405800  | -2.20655900 |
| C  | 4.01999400  | 3.51830500  | -0.07940000 |
| C  | 4.31057600  | 3.46931900  | -1.43853200 |
| P  | 1.94358100  | -0.02743100 | 0.44990300  |
| Pd | -0.02699600 | -0.08357200 | -0.67430200 |
| O  | 0.01560400  | -1.45213200 | -3.38000900 |
| O  | 0.14066600  | -2.18575000 | -1.24611500 |
| C  | 0.28966000  | -2.31186300 | -2.51870600 |
| C  | 0.90896200  | -3.63006200 | -2.94631100 |
| C  | -5.96117400 | 0.48936200  | 0.04104900  |
| C  | -5.15049100 | -0.68343600 | 0.15923900  |
| C  | -7.27840800 | 0.20395900  | -0.18954100 |

---

|   |             |             |             |
|---|-------------|-------------|-------------|
| C | -5.86720000 | -1.83976200 | 0.02237200  |
| S | -7.53494600 | -1.49982300 | -0.25823100 |
| O | -5.44691200 | 1.74927600  | 0.12991700  |
| C | -4.15927800 | 1.74543300  | 0.76051500  |
| O | -3.80574000 | -0.62891300 | 0.39676700  |
| C | -3.25670800 | 0.69163200  | 0.16349100  |
| C | -2.98236100 | 0.87941900  | -1.31449300 |
| H | -8.09651900 | 0.90007800  | -0.31896900 |
| H | -3.74176200 | 2.74463500  | 0.60878600  |
| H | -4.27895300 | 1.56940100  | 1.83958900  |
| H | -2.29799700 | 0.68051800  | 0.69682100  |
| H | -3.90976600 | 0.76806300  | -1.89537700 |
| H | -2.59690200 | 1.89215800  | -1.48265100 |
| H | -5.50403900 | -2.85815400 | 0.06684800  |
| H | 1.99942800  | -3.55363400 | -2.83189100 |
| H | 0.58113200  | -4.45970500 | -2.31095100 |
| H | 0.69564800  | -3.85695100 | -3.99502800 |
| N | -1.95626100 | -0.07746100 | -1.73719000 |
| H | -2.30753500 | -1.03001300 | -1.64252800 |
| H | -1.70986500 | 0.02427900  | -2.72086600 |
| H | 4.65981500  | -0.66451300 | -0.68201600 |
| H | 5.82720200  | -2.82562100 | -1.01563000 |
| H | 4.08185100  | 0.40591200  | 2.30435700  |
| H | 4.23817900  | 0.65053500  | 4.76133800  |
| H | 3.11927000  | 2.49783300  | 1.58111000  |
| H | 4.30668000  | 4.38152900  | 0.51654600  |
| H | 2.15221000  | 0.57028100  | 6.13245100  |
| H | 4.83577700  | 4.29322200  | -1.91805300 |
| H | 4.73671900  | -4.94144300 | -0.28416400 |
| H | 4.13874800  | 2.35400600  | -3.27087600 |
| H | 2.54243000  | -4.89095200 | 0.84479300  |
| H | -0.02311100 | 0.19634200  | 5.06025700  |
| C | -0.12674300 | 1.91465400  | -0.43590500 |
| C | -0.49735700 | 2.61753400  | 0.71777200  |
| C | 0.13575400  | 2.65626100  | -1.59960500 |
| C | -0.62850900 | 4.00963400  | 0.70056400  |
| H | -0.69572800 | 2.07796700  | 1.64465200  |
| C | 0.00947200  | 4.04524100  | -1.61802700 |
| H | 0.44712200  | 2.14009600  | -2.51183500 |
| C | -0.37827700 | 4.72899100  | -0.46544000 |
| H | -0.92693600 | 4.53229700  | 1.60992200  |
| H | 0.21683500  | 4.59491500  | -2.53660800 |
| H | -0.47868800 | 5.81317100  | -0.47615000 |
| O | 2.76716500  | 0.23858200  | -2.28061800 |

---

|   |             |             |             |
|---|-------------|-------------|-------------|
| O | 1.19895800  | -2.59613500 | 1.40631400  |
| O | -0.38780600 | -0.17058100 | 2.42108400  |
| C | 0.37311300  | -3.74020200 | 1.53869400  |
| H | 0.20011500  | -4.19833300 | 0.55724200  |
| H | 0.80928300  | -4.47434400 | 2.22876400  |
| H | -0.57431800 | -3.38055600 | 1.94655400  |
| C | 2.97073200  | 0.17893300  | -3.68295200 |
| H | 4.03993300  | 0.11559900  | -3.92409300 |
| H | 2.44969900  | -0.72106600 | -4.01206700 |
| H | 2.53479200  | 1.05380500  | -4.18336700 |
| C | -1.54708400 | -0.35349200 | 3.21916400  |
| H | -1.84236200 | 0.58081500  | 3.71667300  |
| H | -2.33473600 | -0.66821200 | 2.53057900  |
| H | -1.39147700 | -1.13497000 | 3.97364200  |

(L7)Pd(Ph)(OAc)(EDOT-NH<sub>2</sub>)

-----  
M06-L electronic energy (Hartree): -2798.004053

M06-L thermal correction to free energy (Hartree): 0.478762

Three lowest frequencies (cm<sup>-1</sup>): 13.75, 21.06, 23.71

-----

|    |             |             |             |
|----|-------------|-------------|-------------|
| C  | -2.87489800 | 1.72071800  | 0.20977000  |
| C  | -2.32431600 | 2.79096700  | 0.91886900  |
| C  | -4.02298400 | 1.97416200  | -0.54836500 |
| C  | -2.84981700 | 4.07022200  | 0.88056200  |
| C  | -4.57322600 | 3.25231500  | -0.60193700 |
| C  | -3.98366400 | 4.29864600  | 0.10415200  |
| C  | -2.18090700 | -0.26031200 | 2.08636800  |
| C  | -3.45842300 | -0.39291500 | 2.65600700  |
| C  | -1.09273900 | -0.31535400 | 2.95767300  |
| C  | -3.62552300 | -0.61849000 | 4.01620100  |
| C  | -1.23258700 | -0.54121100 | 4.31934400  |
| C  | -2.50833700 | -0.70008000 | 4.84706200  |
| C  | -3.08918800 | -1.08880300 | -0.53125800 |
| C  | -3.26671600 | -0.96770800 | -1.91155500 |
| C  | -3.58522000 | -2.25436200 | 0.06846000  |
| C  | -3.94099300 | -1.90138300 | -2.67817400 |
| C  | -4.25870200 | -3.21548600 | -0.67990600 |
| C  | -4.44452900 | -3.03630600 | -2.04880100 |
| P  | -2.00987400 | 0.11824900  | 0.30665800  |
| Pd | 0.04182600  | 0.14680100  | -0.63330200 |
| O  | 0.30508400  | 1.94719800  | -3.03750100 |
| O  | 0.10189600  | 2.30675700  | -0.82029200 |
| C  | 0.13226100  | 2.68843500  | -2.05189600 |

---

|   |             |             |             |
|---|-------------|-------------|-------------|
| C | -0.10905700 | 4.17297100  | -2.24914400 |
| C | 5.89725700  | -0.51668600 | 0.37249800  |
| C | 5.07723200  | 0.65157400  | 0.46682300  |
| C | 7.22005100  | -0.22470700 | 0.18752000  |
| C | 5.79281800  | 1.81176700  | 0.35774000  |
| S | 7.47093500  | 1.48036900  | 0.13397500  |
| O | 5.38478800  | -1.77902500 | 0.43810700  |
| C | 4.07780100  | -1.78328600 | 1.02719100  |
| O | 3.72633500  | 0.59056400  | 0.66189800  |
| C | 3.19071900  | -0.72923500 | 0.40395700  |
| C | 2.98937300  | -0.91388300 | -1.08645800 |
| H | 8.04548200  | -0.91644300 | 0.08353200  |
| H | 3.67267700  | -2.78473000 | 0.85797400  |
| H | 4.16228800  | -1.61055200 | 2.10903200  |
| H | 2.21288600  | -0.72573500 | 0.90271300  |
| H | 3.95030900  | -0.83315500 | -1.61463900 |
| H | 2.58244400  | -1.91387900 | -1.27588100 |
| H | 5.42389700  | 2.82838500  | 0.39547400  |
| H | -1.18534000 | 4.37093400  | -2.15984200 |
| H | 0.38844400  | 4.76858000  | -1.47686200 |
| H | 0.21720300  | 4.50438400  | -3.23900700 |
| N | 2.02353300  | 0.07531900  | -1.57663000 |
| H | 2.40231200  | 1.01610900  | -1.47068500 |
| H | 1.85086200  | -0.03868700 | -2.57343100 |
| H | -4.49927500 | 1.16269900  | -1.09391300 |
| H | -5.46743200 | 3.42820300  | -1.19502400 |
| H | -4.33360600 | -0.31639000 | 2.01103900  |
| H | -4.62567800 | -0.72447100 | 4.42850900  |
| H | -3.42821000 | -2.41895700 | 1.13214700  |
| H | -4.63624200 | -4.10920700 | -0.18904000 |
| H | -2.62886500 | -0.87433500 | 5.91377400  |
| H | -4.97296100 | -3.78491800 | -2.63447600 |
| H | -4.40905000 | 5.29870200  | 0.05903300  |
| H | -4.05037200 | -1.73789100 | -3.74678200 |
| H | -2.37431300 | 4.86249600  | 1.45253300  |
| H | -0.34450900 | -0.57338100 | 4.94429300  |
| F | 0.15976800  | -0.11437800 | 2.49208800  |
| F | -2.73056200 | 0.10862200  | -2.53497700 |
| F | -1.24808900 | 2.55501400  | 1.69975700  |
| C | 0.01011700  | -1.86868900 | -0.60769900 |
| C | 0.29453400  | -2.67102900 | 0.50442500  |
| C | -0.22232100 | -2.50086500 | -1.83868600 |
| C | 0.36472900  | -4.06227600 | 0.38498800  |
| H | 0.47687400  | -2.21640200 | 1.47783500  |

---

|   |             |             |             |
|---|-------------|-------------|-------------|
| C | -0.15621700 | -3.88947100 | -1.95768300 |
| H | -0.45601100 | -1.90395000 | -2.72359700 |
| C | 0.14042800  | -4.67618600 | -0.84477900 |
| H | 0.59687100  | -4.66529900 | 1.26285000  |
| H | -0.33596300 | -4.35768200 | -2.92553600 |
| H | 0.19303900  | -5.75974300 | -0.93630500 |

(L8)Pd(Ph)(OAc)(EDOT-NH<sub>2</sub>)

-----  
M06-L electronic energy (Hartree): -2798.009298

M06-L thermal correction to free energy (Hartree): 0.475173

Three lowest frequencies (cm<sup>-1</sup>): 17.36, 18.16, 25.91

-----

|    |             |             |             |
|----|-------------|-------------|-------------|
| C  | 2.97812100  | -1.38957300 | -0.59245000 |
| C  | 2.53758200  | -2.69967400 | -0.83963400 |
| C  | 4.29738700  | -1.04741100 | -0.91267100 |
| C  | 3.38877700  | -3.64404800 | -1.39785500 |
| C  | 5.15929700  | -1.98345900 | -1.47679800 |
| C  | 4.68877300  | -3.26569100 | -1.71110200 |
| C  | 1.52265900  | -0.93708000 | 1.82775000  |
| C  | 2.55586800  | -1.58066500 | 2.52370600  |
| C  | 0.26391900  | -0.82062500 | 2.43126000  |
| C  | 2.34233900  | -2.09452300 | 3.79650600  |
| C  | 0.03470000  | -1.32846500 | 3.70521400  |
| C  | 1.08162200  | -1.95714000 | 4.36443700  |
| C  | 2.78349800  | 1.28711600  | 0.47301800  |
| C  | 3.18848100  | 2.04851100  | -0.63469300 |
| C  | 3.06495700  | 1.75893000  | 1.75841300  |
| C  | 3.87630200  | 3.24172700  | -0.46844700 |
| C  | 3.74012600  | 2.96274000  | 1.94229700  |
| C  | 4.13424600  | 3.68165000  | 0.82462100  |
| P  | 1.80266800  | -0.21854000 | 0.17658500  |
| Pd | -0.18659100 | 0.02036000  | -0.89352800 |
| O  | -0.51972100 | -1.87780600 | -3.08115700 |
| O  | -0.62112300 | -2.12763700 | -0.84995900 |
| C  | -0.68008900 | -2.57289000 | -2.06038300 |
| C  | -0.93091400 | -4.06194700 | -2.18322000 |
| C  | -5.87076100 | 0.54985200  | 0.35851200  |
| C  | -4.90033200 | -0.49399900 | 0.47162900  |
| C  | -7.14826900 | 0.07622400  | 0.24016200  |
| C  | -5.45558500 | -1.74266300 | 0.44244300  |
| S  | -7.16954000 | -1.64823600 | 0.27443800  |
| O  | -5.52855100 | 1.87001800  | 0.34354900  |
| C  | -4.20469900 | 2.08152500  | 0.85369700  |

---

|   |             |             |             |
|---|-------------|-------------|-------------|
| O | -3.56395400 | -0.24452000 | 0.61128400  |
| C | -3.21637100 | 1.11035100  | 0.24605300  |
| C | -3.11018100 | 1.23259300  | -1.26178100 |
| H | -8.06339700 | 0.64512100  | 0.14048500  |
| H | -3.94554800 | 3.11323400  | 0.60096100  |
| H | -4.21173800 | 1.97292400  | 1.94679400  |
| H | -2.22562800 | 1.26265500  | 0.69214800  |
| H | -4.10276900 | 1.14180100  | -1.72607600 |
| H | -2.71148600 | 2.22332900  | -1.50988400 |
| H | -4.95266100 | -2.69813900 | 0.51488300  |
| H | 0.01948600  | -4.59877900 | -2.06454200 |
| H | -1.60462300 | -4.42534400 | -1.40118900 |
| H | -1.33508500 | -4.31527300 | -3.16713800 |
| N | -2.18730800 | 0.21891800  | -1.78522600 |
| H | -2.58666800 | -0.71045600 | -1.65524200 |
| H | -2.06650000 | 0.33187100  | -2.78976000 |
| H | 4.67187800  | -0.04542100 | -0.71551900 |
| H | 6.18523000  | -1.72872700 | -1.72734300 |
| H | 3.05959500  | -4.66191100 | -1.59104900 |
| H | 1.51511900  | -2.97635500 | -0.58636200 |
| H | 3.53994500  | -1.68273700 | 2.06686300  |
| H | 3.13224400  | -2.59774600 | 4.34703200  |
| H | -0.93762600 | -1.24939900 | 4.18331500  |
| H | -0.54989200 | -0.33640900 | 1.88815300  |
| H | 2.75141800  | 1.19220400  | 2.63300700  |
| H | 3.96104700  | 3.34279700  | 2.93597300  |
| H | 4.19259800  | 3.83901800  | -1.31925200 |
| H | 2.95088100  | 1.70970000  | -1.64308000 |
| F | 5.51664000  | -4.17482600 | -2.25627100 |
| F | 4.78511900  | 4.84652500  | 0.99437100  |
| F | 0.86758600  | -2.45667700 | 5.59345200  |
| C | -0.01049100 | 2.01856800  | -0.96671900 |
| C | -0.11242300 | 2.84188700  | 0.16317900  |
| C | 0.09496300  | 2.62930700  | -2.22390300 |
| C | -0.12497700 | 4.23212100  | 0.03995400  |
| H | -0.17470800 | 2.39987000  | 1.16046200  |
| C | 0.09520600  | 4.02057900  | -2.34787900 |
| H | 0.17539400  | 2.01578700  | -3.12375200 |
| C | -0.01835900 | 4.82696900  | -1.21672300 |
| H | -0.20993400 | 4.85190200  | 0.93258000  |
| H | 0.18209500  | 4.47356800  | -3.33544300 |
| H | -0.02123600 | 5.91139800  | -1.31324200 |

(L9)Pd(Ph)(OAc)(EDOT-NH<sub>2</sub>)

---

-----  
M06-L electronic energy (Hartree): -2798.007621  
M06-L thermal correction to free energy (Hartree): 0.475748  
Three lowest frequencies (cm<sup>-1</sup>): 12.82, 15.62, 23.89  
-----

|    |             |             |             |
|----|-------------|-------------|-------------|
| C  | -2.48715300 | 1.86981700  | 0.47547100  |
| C  | -1.55901800 | 2.84118700  | 0.86759000  |
| C  | -3.82328500 | 2.23008100  | 0.27113100  |
| C  | -1.98381400 | 4.15040800  | 1.01481900  |
| C  | -4.21907300 | 3.55647200  | 0.43206200  |
| C  | -3.30005300 | 4.53475200  | 0.79951600  |
| C  | -1.83093000 | -0.33861500 | 2.09497800  |
| C  | -2.99331600 | -0.55541400 | 2.84665900  |
| C  | -0.58415600 | -0.37800000 | 2.72438100  |
| C  | -2.89987600 | -0.83761900 | 4.20677800  |
| C  | -0.52204700 | -0.65166800 | 4.08216400  |
| C  | -1.65930900 | -0.89138600 | 4.83863600  |
| C  | -3.19773600 | -0.80143400 | -0.45778500 |
| C  | -3.67068500 | -0.34036200 | -1.69412200 |
| C  | -3.61575700 | -2.04587400 | 0.02678600  |
| C  | -4.56825800 | -1.12645800 | -2.39674500 |
| C  | -4.52066800 | -2.81079300 | -0.70622100 |
| C  | -5.00882200 | -2.35682900 | -1.92775900 |
| P  | -1.87041800 | 0.15303200  | 0.33552200  |
| Pd | 0.09592700  | -0.10261000 | -0.75696300 |
| O  | -1.37539700 | 1.88663500  | -2.45912000 |
| O  | 0.50818500  | 1.97213700  | -1.23001000 |
| C  | -0.39911900 | 2.49522000  | -1.98410100 |
| C  | -0.20182500 | 3.97097500  | -2.26791700 |
| C  | 5.92348700  | -0.46024600 | 0.06053400  |
| C  | 5.05076000  | 0.66419300  | -0.07695200 |
| C  | 7.22361000  | -0.16349300 | -0.24183000 |
| C  | 5.70196500  | 1.79661800  | -0.48072600 |
| S  | 7.38639100  | 1.49252100  | -0.69400200 |
| O  | 5.47552400  | -1.69475300 | 0.42987700  |
| C  | 4.18974300  | -1.61949900 | 1.05854700  |
| O  | 3.71161500  | 0.59487000  | 0.18799000  |
| C  | 3.23325000  | -0.76695700 | 0.25432500  |
| C  | 2.98447900  | -1.29178700 | -1.14528300 |
| H  | 8.07975300  | -0.82459300 | -0.22319400 |
| H  | 3.82807600  | -2.64846900 | 1.13405200  |
| H  | 4.29936000  | -1.20460400 | 2.06996800  |
| H  | 2.27253000  | -0.68866000 | 0.78277600  |
| H  | 3.92490100  | -1.32878500 | -1.71349400 |

---

|   |             |             |             |
|---|-------------|-------------|-------------|
| H | 2.58547500  | -2.31085700 | -1.08255900 |
| H | 5.28331300  | 2.77884800  | -0.65657100 |
| H | -0.06210700 | 4.52266700  | -1.33085800 |
| H | 0.70639500  | 4.12553100  | -2.86231100 |
| H | -1.05308300 | 4.39044500  | -2.81102000 |
| N | 1.98618100  | -0.45257200 | -1.82108500 |
| H | 2.35376400  | 0.48893800  | -1.96311400 |
| H | 1.79357300  | -0.82989500 | -2.74755200 |
| H | -4.55689100 | 1.47969000  | -0.01528300 |
| H | -5.25830200 | 3.83264700  | 0.26714900  |
| H | -0.51064800 | 2.59504300  | 1.02187700  |
| H | -3.97135000 | -0.50221300 | 2.37046400  |
| H | -3.80304700 | -1.01514300 | 4.78620800  |
| H | 0.32988000  | -0.19089300 | 2.16035300  |
| H | -3.22451700 | -2.42905700 | 0.96731200  |
| H | -4.84613200 | -3.77591200 | -0.32421000 |
| H | -3.32153600 | 0.60291500  | -2.11085300 |
| H | -1.56768800 | -1.10891500 | 5.89918800  |
| H | -5.71264400 | -2.93992300 | -2.51559500 |
| H | -3.58804800 | 5.57551800  | 0.92035000  |
| F | 0.68395500  | -0.68990100 | 4.67972500  |
| F | -5.02581700 | -0.68278400 | -3.58424000 |
| F | -1.07713200 | 5.08743100  | 1.35914600  |
| C | -0.12319900 | -2.09520700 | -0.52804800 |
| C | 0.33235900  | -2.84099400 | 0.56649600  |
| C | -0.65185800 | -2.78923800 | -1.62671200 |
| C | 0.27331200  | -4.23733400 | 0.55824500  |
| H | 0.74132900  | -2.34091600 | 1.44627100  |
| C | -0.70621900 | -4.18327400 | -1.63907000 |
| H | -1.03297000 | -2.23487200 | -2.48756700 |
| C | -0.24469700 | -4.91292400 | -0.54409100 |
| H | 0.63528500  | -4.79556000 | 1.42156700  |
| H | -1.11731300 | -4.69980400 | -2.50654600 |
| H | -0.29028000 | -6.00068900 | -0.54982300 |

(L10)Pd(Ph)(OAc)(EDOT-NH<sub>2</sub>)

-----

M06-L electronic energy (Hartree): -4522.867697

M06-L thermal correction to free energy (Hartree): 0.504393

Three lowest frequencies (cm<sup>-1</sup>): 10.08, 15.31, 16.09

-----

|   |             |            |            |
|---|-------------|------------|------------|
| C | -1.17441100 | 1.81384100 | 0.49761900 |
| C | -0.13400900 | 2.60717300 | 1.00069100 |
| C | -2.46678700 | 2.32903600 | 0.45233100 |

---

|    |             |             |             |
|----|-------------|-------------|-------------|
| C  | -0.39333800 | 3.90107600  | 1.42912400  |
| C  | -2.71528400 | 3.63355400  | 0.88393400  |
| C  | -1.68516600 | 4.42655900  | 1.36685600  |
| C  | -0.65195600 | -0.74625300 | 1.58894200  |
| C  | -1.76682600 | -0.98688000 | 2.39441400  |
| C  | 0.61349600  | -1.12470600 | 2.04028400  |
| C  | -1.60943200 | -1.62504200 | 3.62371900  |
| C  | 0.76329200  | -1.77057200 | 3.26107500  |
| C  | -0.34930400 | -2.02623900 | 4.05801800  |
| C  | -2.20840400 | -0.54222800 | -0.87373900 |
| C  | -2.70223800 | 0.17914400  | -1.96785000 |
| C  | -2.69045600 | -1.82887300 | -0.62917400 |
| C  | -3.67405600 | -0.38003100 | -2.78896200 |
| C  | -3.66637400 | -2.37793100 | -1.46076300 |
| C  | -4.16487600 | -1.66028300 | -2.54098900 |
| P  | -0.74312700 | 0.11467100  | -0.02121200 |
| Pd | 1.13636300  | -0.09842500 | -1.26030800 |
| O  | -0.31933000 | 2.21006100  | -2.45467900 |
| O  | 1.64764000  | 2.00629100  | -1.38369700 |
| C  | 0.74216000  | 2.68279500  | -2.00581400 |
| C  | 1.04878200  | 4.15804500  | -2.15147500 |
| C  | 6.92825200  | -0.64017200 | -0.82943200 |
| C  | 6.03451900  | 0.47186700  | -0.73914600 |
| C  | 8.18870300  | -0.27657000 | -1.21534700 |
| C  | 6.63010800  | 1.66181600  | -1.05136800 |
| S  | 8.28885900  | 1.42766600  | -1.45911600 |
| O  | 6.53138400  | -1.92207100 | -0.58219300 |
| C  | 5.29361800  | -1.96568300 | 0.13890900  |
| O  | 4.72500500  | 0.33563700  | -0.36883900 |
| C  | 4.27058300  | -1.03094900 | -0.46993200 |
| C  | 3.94024700  | -1.35763800 | -1.91315600 |
| H  | 9.05068000  | -0.91417000 | -1.36252500 |
| H  | 4.95484100  | -3.00461400 | 0.09376800  |
| H  | 5.46694700  | -1.69293800 | 1.18892400  |
| H  | 3.34639100  | -1.04895700 | 0.12556000  |
| H  | 4.85376300  | -1.36013700 | -2.52435400 |
| H  | 3.49559800  | -2.35773400 | -1.96501800 |
| H  | 6.18442300  | 2.64787000  | -1.06181800 |
| H  | 1.16622100  | 4.61703400  | -1.16288700 |
| H  | 1.99985200  | 4.30115100  | -2.67634900 |
| H  | 0.25680300  | 4.68037400  | -2.69386100 |
| N  | 2.96330400  | -0.38952500 | -2.42976800 |
| H  | 3.38276000  | 0.54082400  | -2.45477700 |
| H  | 2.72338000  | -0.62469800 | -3.39135400 |

---

|   |             |             |             |
|---|-------------|-------------|-------------|
| H | -3.29481300 | 1.72465200  | 0.08479100  |
| H | -2.76322400 | -0.69126000 | 2.06770700  |
| H | -2.28291600 | -2.43133100 | 0.18239600  |
| H | -0.23756700 | -2.54343700 | 5.00791500  |
| H | -4.90970700 | -2.10187800 | -3.19622500 |
| H | -1.88235700 | 5.44371300  | 1.69586000  |
| H | -2.28579900 | 1.15686200  | -2.20441200 |
| H | 0.88126000  | 2.21826900  | 1.03371300  |
| H | 1.48099400  | -0.91337900 | 1.41587400  |
| C | -4.11765300 | 4.15325000  | 0.78944700  |
| C | 0.70649000  | 4.77948000  | 1.94132700  |
| C | -2.80179900 | -1.83638900 | 4.50859600  |
| C | 2.11833200  | -2.20250200 | 3.73372700  |
| C | -4.15880700 | -3.76229300 | -1.16606700 |
| C | -4.19604000 | 0.42006700  | -3.94346300 |
| F | -4.89872300 | -4.26615600 | -2.16964500 |
| F | -4.92245100 | -3.78706900 | -0.05274700 |
| F | -3.13560200 | -4.61399300 | -0.94796500 |
| F | -4.65306500 | -0.36571900 | -4.93646200 |
| F | -5.21927100 | 1.22052500  | -3.57364800 |
| F | -3.24239300 | 1.22041100  | -4.46151400 |
| F | -2.64943200 | -2.90723100 | 5.30980900  |
| F | -3.00839400 | -0.77073500 | 5.31172200  |
| F | -3.92884800 | -2.01435000 | 3.79301100  |
| F | 2.10279000  | -3.47673400 | 4.16941100  |
| F | 3.04766000  | -2.12013100 | 2.75535200  |
| F | 2.55285000  | -1.44602700 | 4.76074400  |
| F | 1.89630000  | 4.15417200  | 1.96873600  |
| F | 0.44739000  | 5.22249100  | 3.18783600  |
| F | 0.85028900  | 5.87991700  | 1.16742800  |
| F | -4.24891900 | 5.38330800  | 1.31557800  |
| F | -4.98615300 | 3.34102700  | 1.42790200  |
| F | -4.52779500 | 4.21676400  | -0.49513700 |
| C | 0.75613300  | -2.08386300 | -1.36849100 |
| C | 1.28964000  | -3.06203500 | -0.51883500 |
| C | -0.02695300 | -2.50710300 | -2.45253600 |
| C | 1.03930500  | -4.41888500 | -0.74100400 |
| H | 1.91118200  | -2.78496700 | 0.33472600  |
| C | -0.27723200 | -3.86124500 | -2.67566700 |
| H | -0.46889500 | -1.76793600 | -3.12474300 |
| C | 0.25216500  | -4.82246100 | -1.81632100 |
| H | 1.46307300  | -5.15960400 | -0.06349000 |
| H | -0.90297700 | -4.16188300 | -3.51594700 |
| H | 0.04917100  | -5.87919900 | -1.98221600 |

---

(L11)Pd(Ph)(OAc)(EDOT-NH<sub>2</sub>)

-----  
M06-L electronic energy (Hartree): -3988.974937

M06-L thermal correction to free energy (Hartree): 0.368577

Three lowest frequencies (cm<sup>-1</sup>): 14.63, 17.30, 22.17  
-----

|    |             |             |             |
|----|-------------|-------------|-------------|
| C  | -2.22199100 | 1.65057600  | -0.10801800 |
| C  | -1.61285200 | 2.79870200  | 0.40694500  |
| C  | -3.41951400 | 1.83014100  | -0.79993300 |
| C  | -2.12182500 | 4.07019300  | 0.20107800  |
| C  | -3.95415200 | 3.09522700  | -1.01416400 |
| C  | -3.30017700 | 4.21720900  | -0.52113900 |
| C  | -1.48254300 | -0.10606500 | 1.94154300  |
| C  | -2.75003300 | -0.29554200 | 2.49824600  |
| C  | -0.41343300 | 0.01542800  | 2.83095900  |
| C  | -2.95154200 | -0.41377000 | 3.86340700  |
| C  | -0.58879400 | -0.09763700 | 4.20457500  |
| C  | -1.85963800 | -0.31610600 | 4.72061000  |
| C  | -2.19283800 | -1.24075900 | -0.67835500 |
| C  | -2.32291100 | -1.13618800 | -2.06579800 |
| C  | -2.50787700 | -2.47624500 | -0.11371900 |
| C  | -2.78114500 | -2.17466200 | -2.85710100 |
| C  | -2.96497800 | -3.53802700 | -0.88602000 |
| C  | -3.10646400 | -3.38659800 | -2.25812900 |
| P  | -1.27727800 | 0.10559500  | 0.14161400  |
| F  | -0.51191100 | 2.67307500  | 1.15728900  |
| F  | 0.82980100  | 0.25988200  | 2.40048000  |
| F  | -1.96231000 | 0.00717000  | -2.66799400 |
| F  | -4.17159000 | -0.61989700 | 4.35468600  |
| F  | -2.03294900 | -0.42764700 | 6.03166900  |
| F  | 0.45324100  | 0.01494400  | 5.02593500  |
| F  | -3.81545700 | -0.38934500 | 1.69445200  |
| F  | -2.35305100 | -2.70710800 | 1.19396100  |
| F  | -3.25760100 | -4.70536000 | -0.31406800 |
| F  | -3.54793300 | -4.39739600 | -2.99845100 |
| F  | -2.89699800 | -2.02952500 | -4.17605400 |
| F  | -4.11525800 | 0.79241300  | -1.27377800 |
| F  | -5.10145400 | 3.23497000  | -1.67869600 |
| F  | -3.81057500 | 5.42669600  | -0.72802600 |
| F  | -1.49546000 | 5.14092500  | 0.68864100  |
| Pd | 0.79416800  | 0.17612300  | -0.72934400 |
| O  | 0.96716000  | 1.53163200  | -3.39655700 |
| O  | 0.65943300  | 2.26599100  | -1.28655300 |

---

|   |             |             |             |
|---|-------------|-------------|-------------|
| C | 0.64568200  | 2.40554500  | -2.57056900 |
| C | 0.13896000  | 3.75244600  | -3.04548800 |
| C | 6.74348200  | -0.38396800 | 0.19079900  |
| C | 5.91177000  | 0.77158200  | 0.32827500  |
| C | 8.05483000  | -0.07079700 | -0.03644900 |
| C | 6.60701300  | 1.94312000  | 0.20984000  |
| S | 8.28018500  | 1.63802000  | -0.07704900 |
| O | 6.25055700  | -1.65411200 | 0.25925200  |
| C | 4.96674400  | -1.68298400 | 0.89591300  |
| O | 4.56870400  | 0.68961300  | 0.56742000  |
| C | 4.04347700  | -0.63522300 | 0.31640900  |
| C | 3.78937500  | -0.80744900 | -1.16740900 |
| H | 8.88576900  | -0.74932000 | -0.17757500 |
| H | 4.56868600  | -2.68788400 | 0.73116400  |
| H | 5.08835300  | -1.51965400 | 1.97563500  |
| H | 3.08513000  | -0.65197400 | 0.84986000  |
| H | 4.72736600  | -0.69977200 | -1.73054300 |
| H | 3.39376400  | -1.81174700 | -1.35719900 |
| H | 6.22510000  | 2.95357000  | 0.27326100  |
| H | -0.95349800 | 3.69721000  | -3.14536400 |
| H | 0.35779800  | 4.54937400  | -2.32763800 |
| H | 0.54796800  | 4.00969300  | -4.02684900 |
| N | 2.79322200  | 0.17453300  | -1.60664400 |
| H | 3.14992000  | 1.11747700  | -1.44841100 |
| H | 2.60669600  | 0.11958700  | -2.60812000 |
| C | 0.87812600  | -1.82723200 | -0.46191500 |
| C | 1.09837900  | -2.50315000 | 0.74286400  |
| C | 0.73319200  | -2.58502000 | -1.63453500 |
| C | 1.18001800  | -3.89893700 | 0.77364900  |
| H | 1.21673400  | -1.95180600 | 1.67515900  |
| C | 0.81266600  | -3.97749300 | -1.60310000 |
| H | 0.55790600  | -2.08363700 | -2.59013900 |
| C | 1.03629500  | -4.63976500 | -0.39583900 |
| H | 1.35444800  | -4.40390500 | 1.72349300  |
| H | 0.69918200  | -4.54506000 | -2.52666500 |
| H | 1.09548600  | -5.72627900 | -0.36867400 |

## 7. NMR Spectra

### 7.1 NMR spectra of Rh-phosphine complexes

$^1\text{H}$  NMR of  $\text{RhClCO}(\text{L4})_2$  (600MHz,  $\text{CDCl}_3$ , 323K)

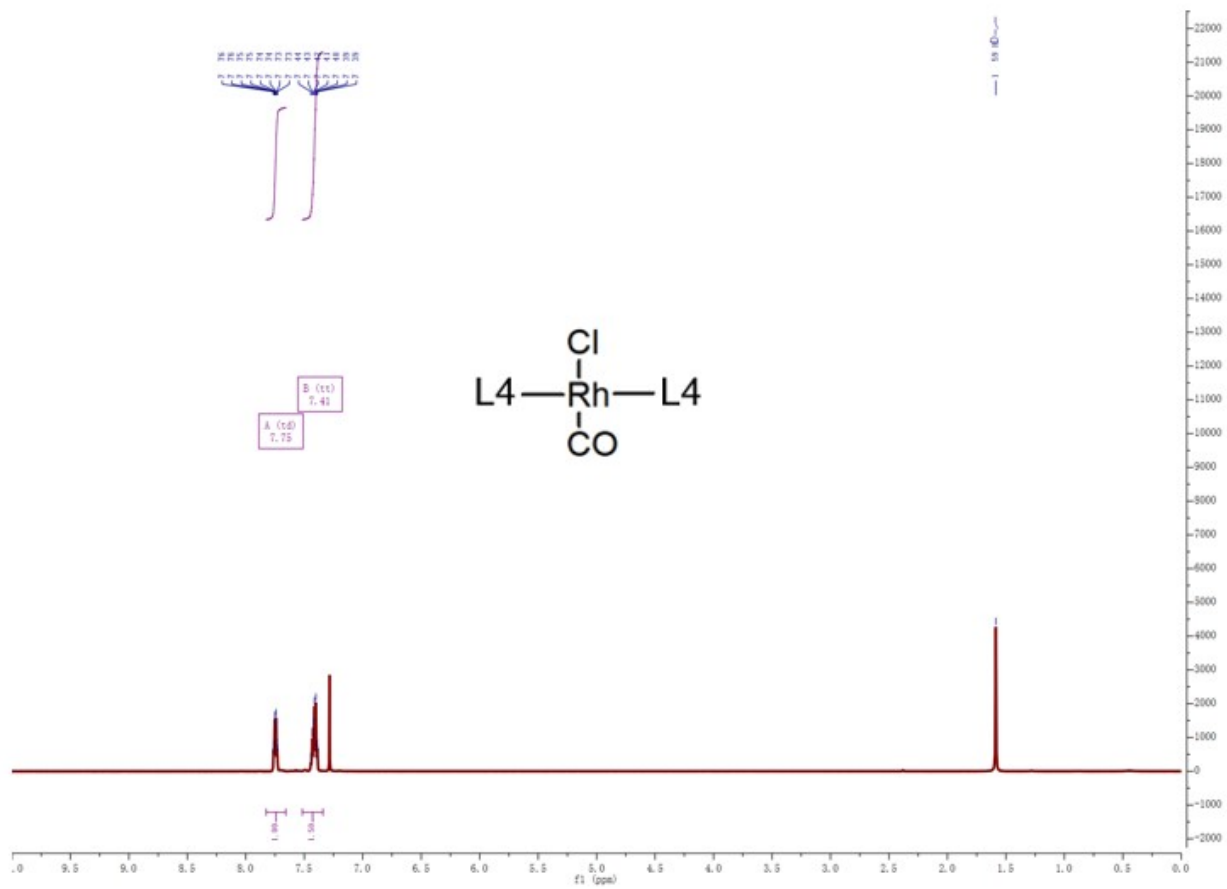

$^1\text{P}$  NMR of  $\text{RhClCO}(\text{L4})_2$  (243MHz,  $\text{CDCl}_3$ , 323K)

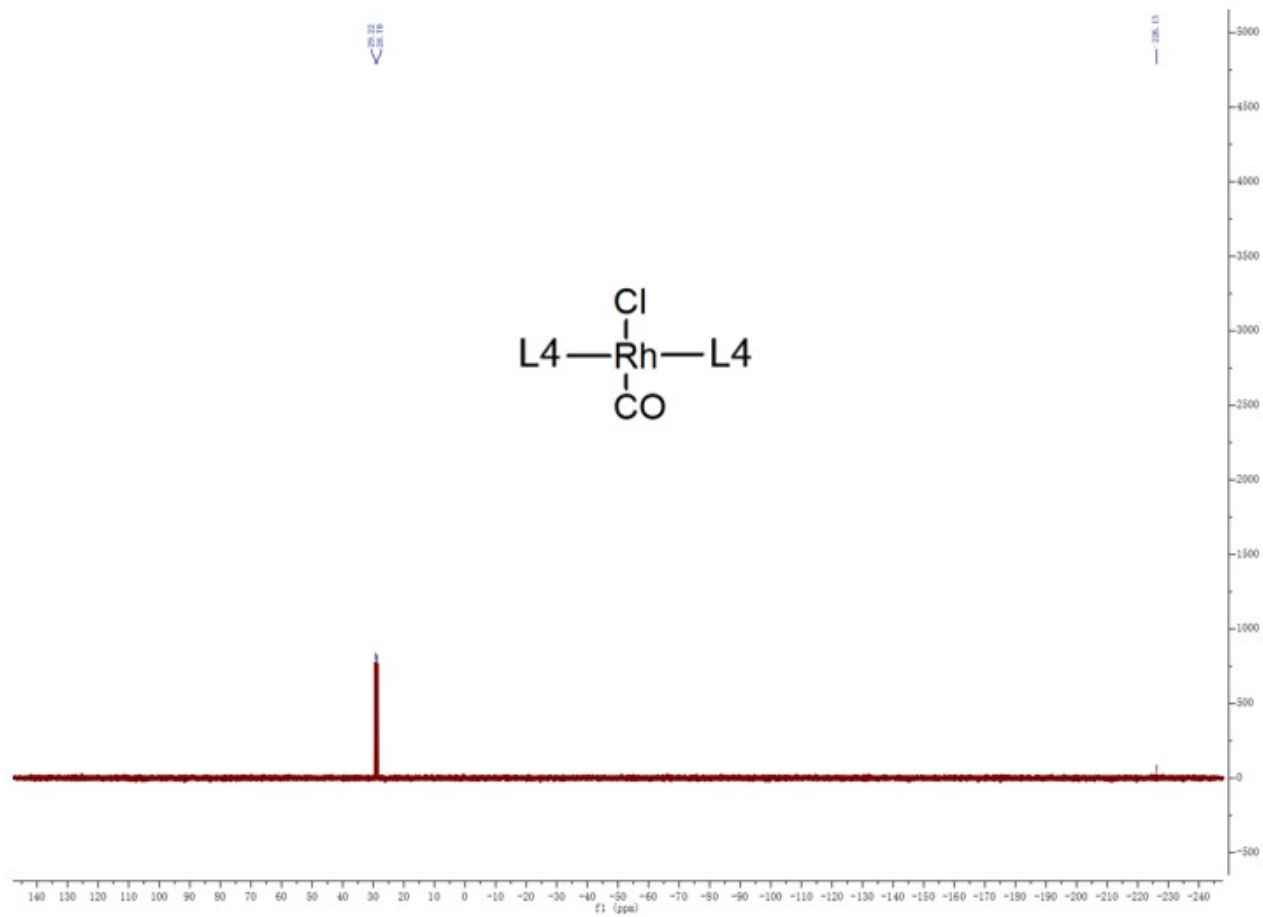

$^1\text{H}$  NMR of  $\text{RhClCO}(\text{L5})_2$  (600MHz,  $\text{CDCl}_3$ , 323K)

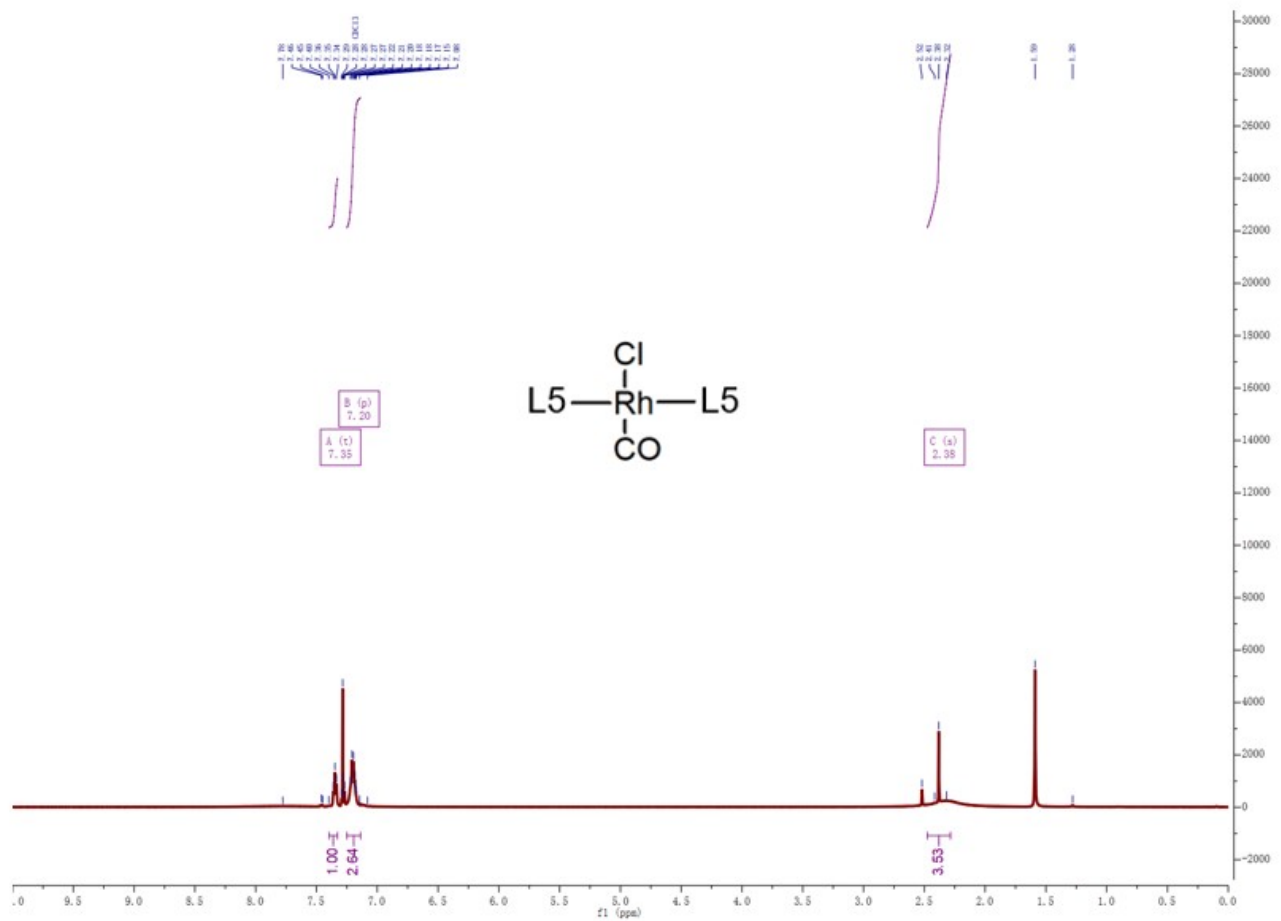

$^1\text{P}$  NMR of  $\text{RhClCO}(\text{L5})_2$  (243MHz,  $\text{CDCl}_3$ , 323K)

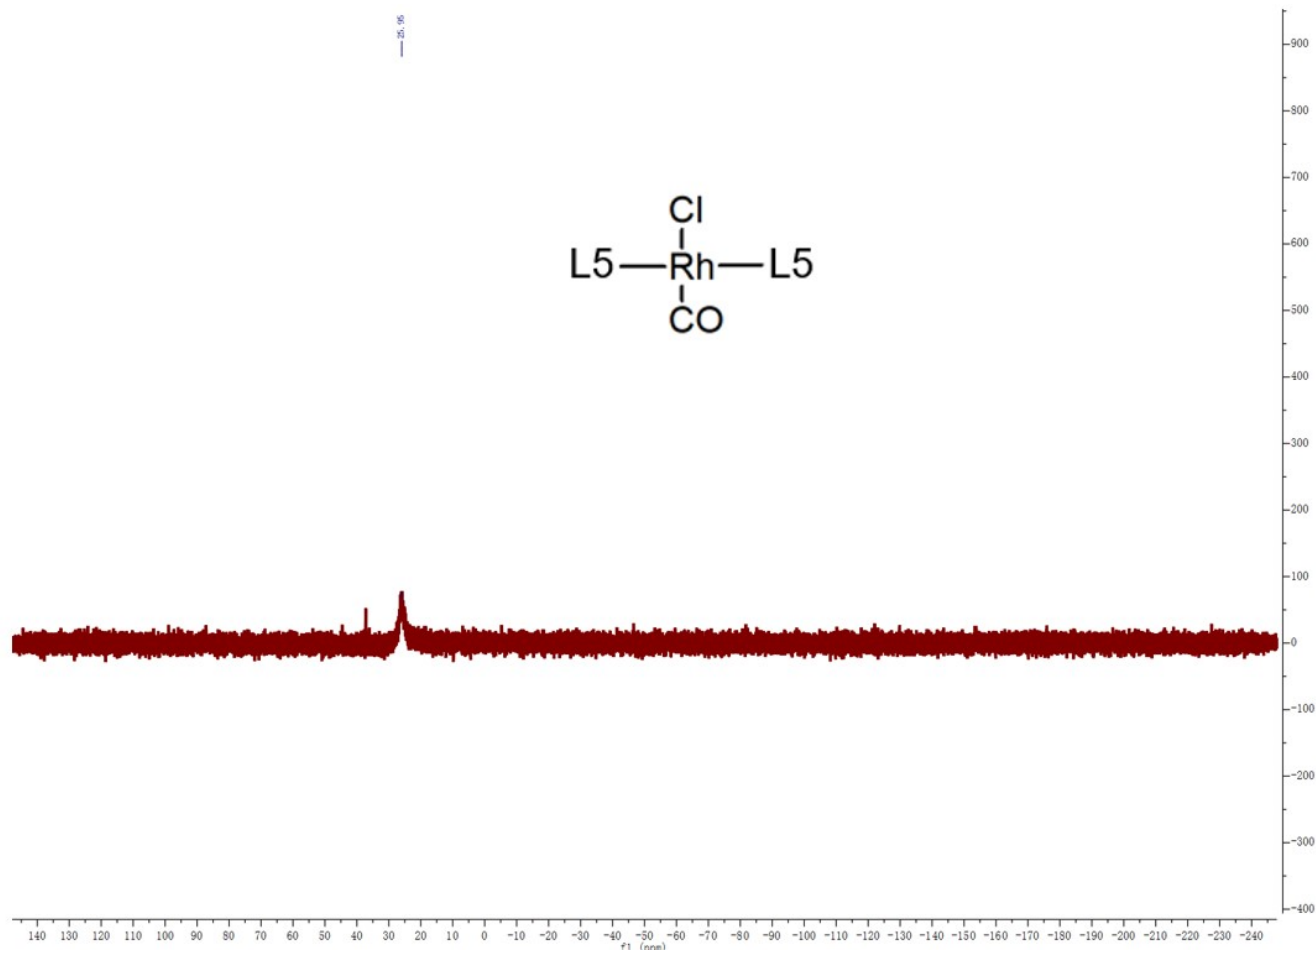

$^1\text{H}$  NMR of  $\text{RhClCO}(\text{L6})_2$  (600MHz,  $\text{CDCl}_3$ , 323K)

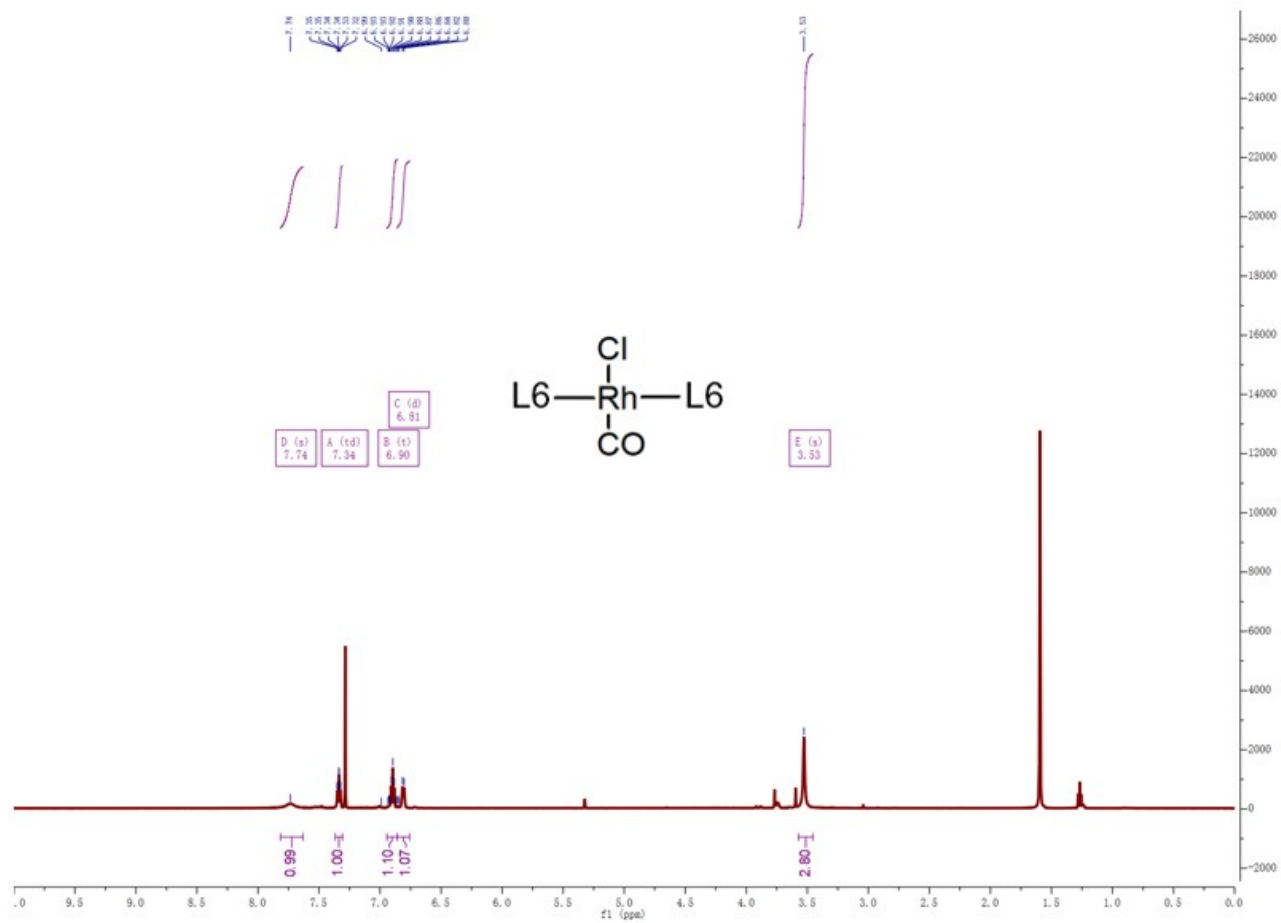

$^1\text{P}$  NMR of  $\text{RhClCO}(\text{L6})_2$  (243MHz,  $\text{CDCl}_3$ , 323K)

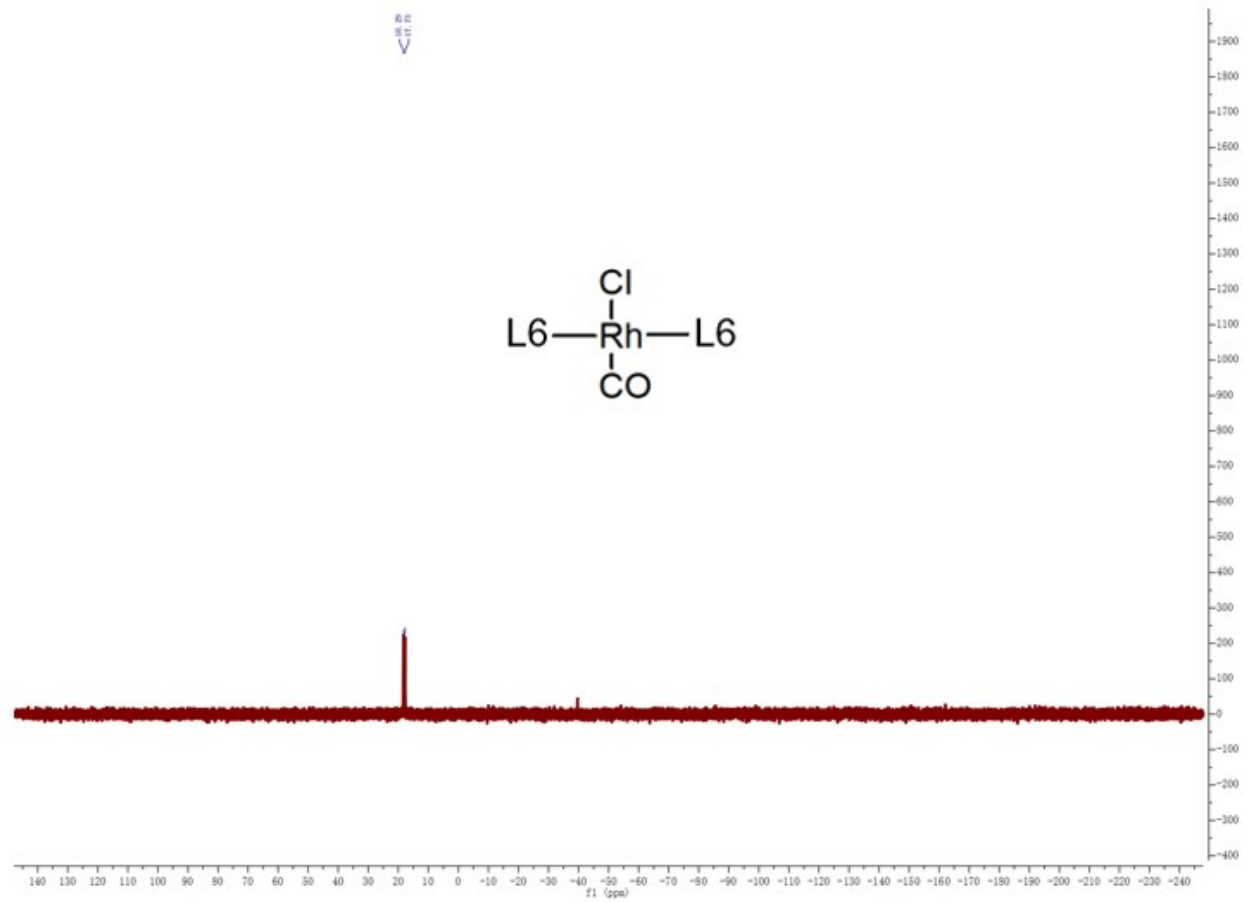

$^1\text{H}$  NMR of  $\text{RhClCO}(\text{L7})_2$  (600MHz,  $\text{CDCl}_3$ , 323K)

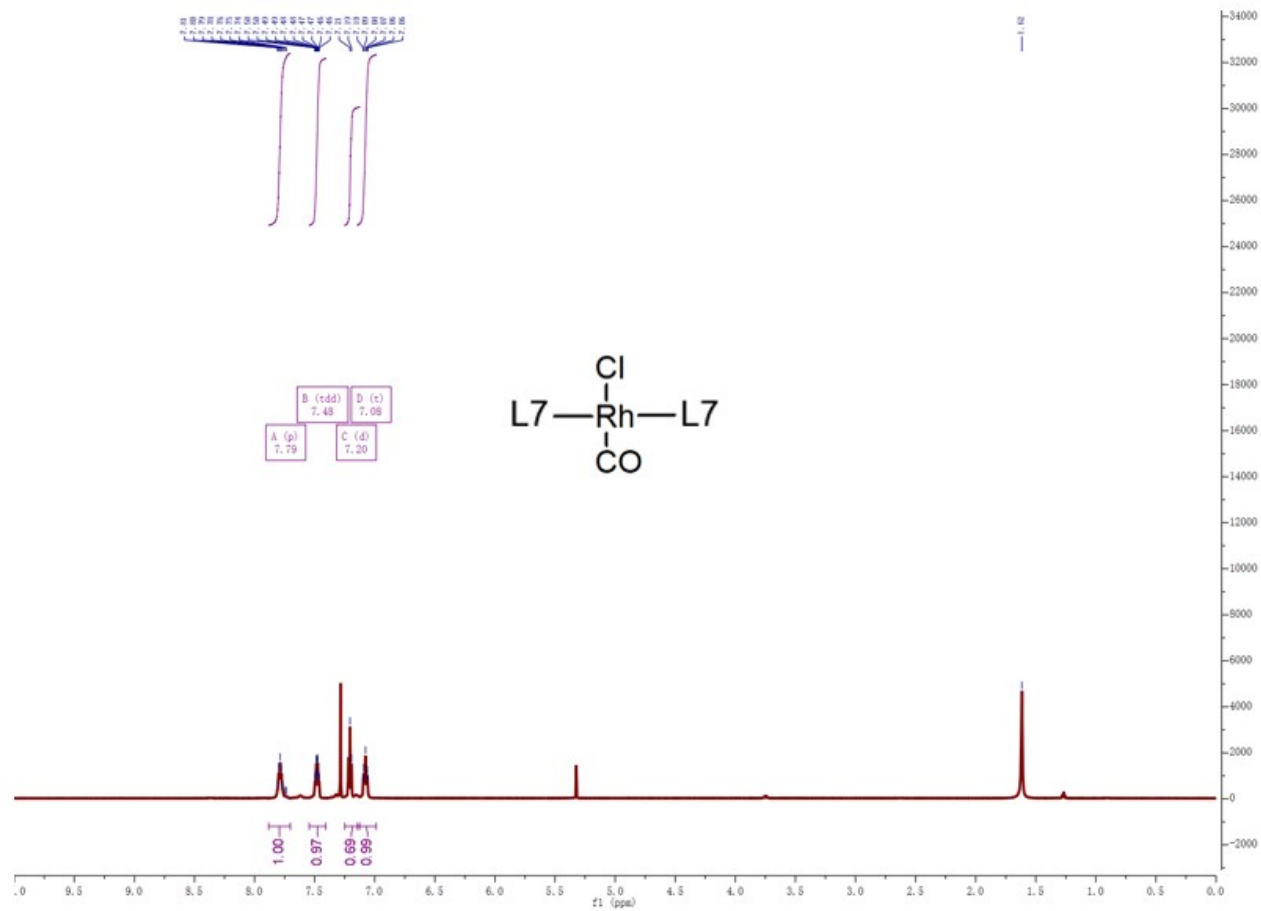

$^1\text{P}$  NMR of  $\text{RhClCO}(\text{L7})_2$  (243MHz,  $\text{CDCl}_3$ , 323K)

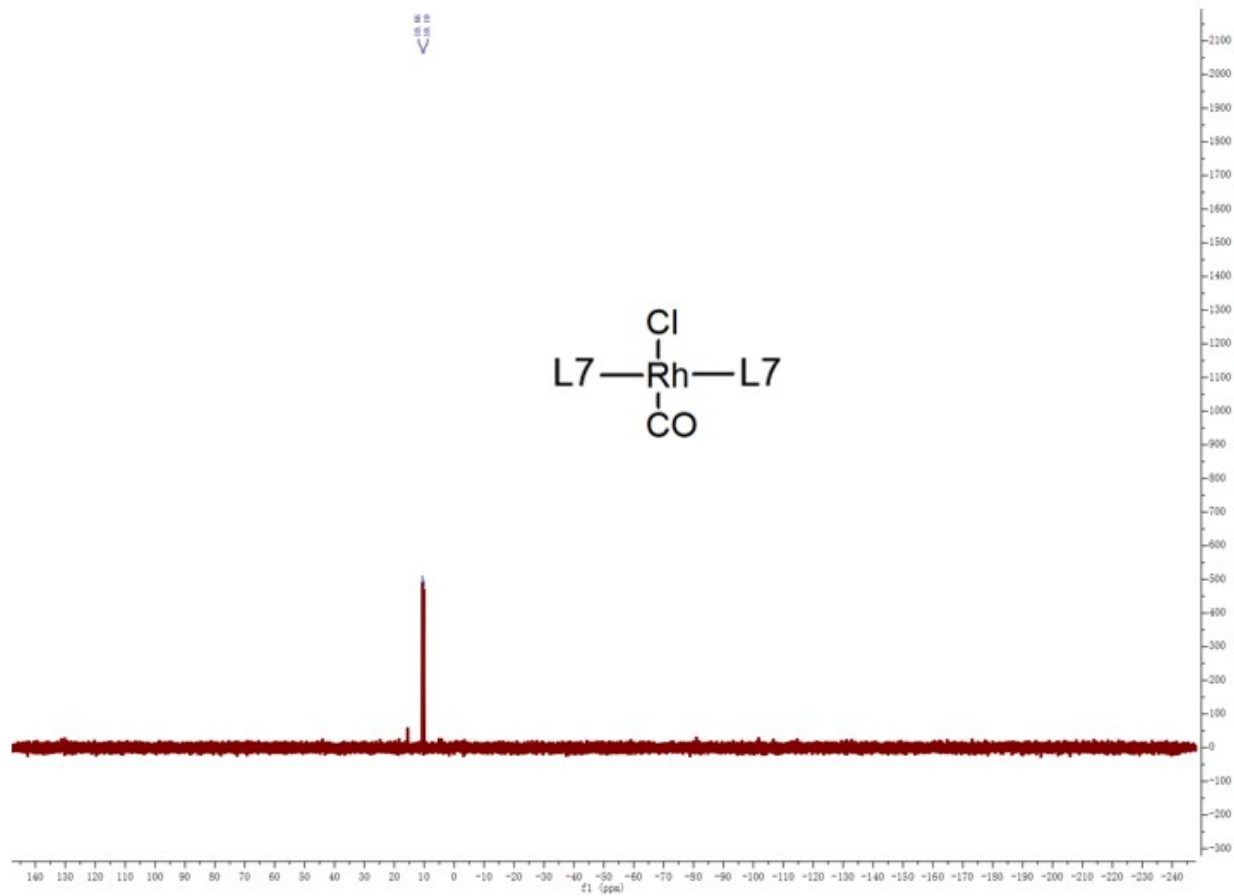

$^1\text{H}$  NMR of  $\text{RhClCO}(\text{L8})_2$  (600MHz,  $\text{CDCl}_3$ , 323K)

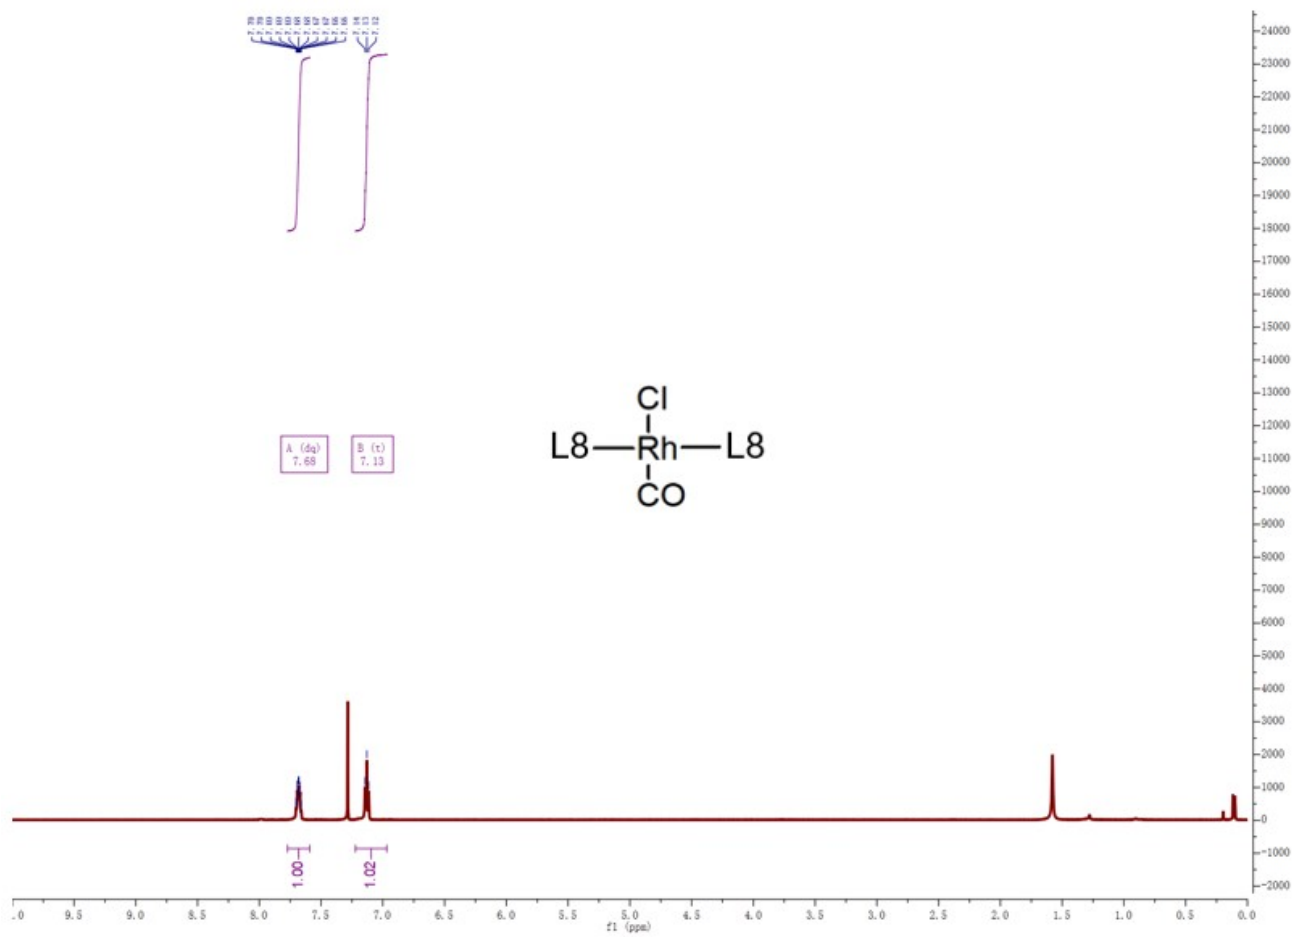

$^1\text{P}$  NMR of  $\text{RhClCO}(\text{L8})_2$  (243MHz,  $\text{CDCl}_3$ , 323K)

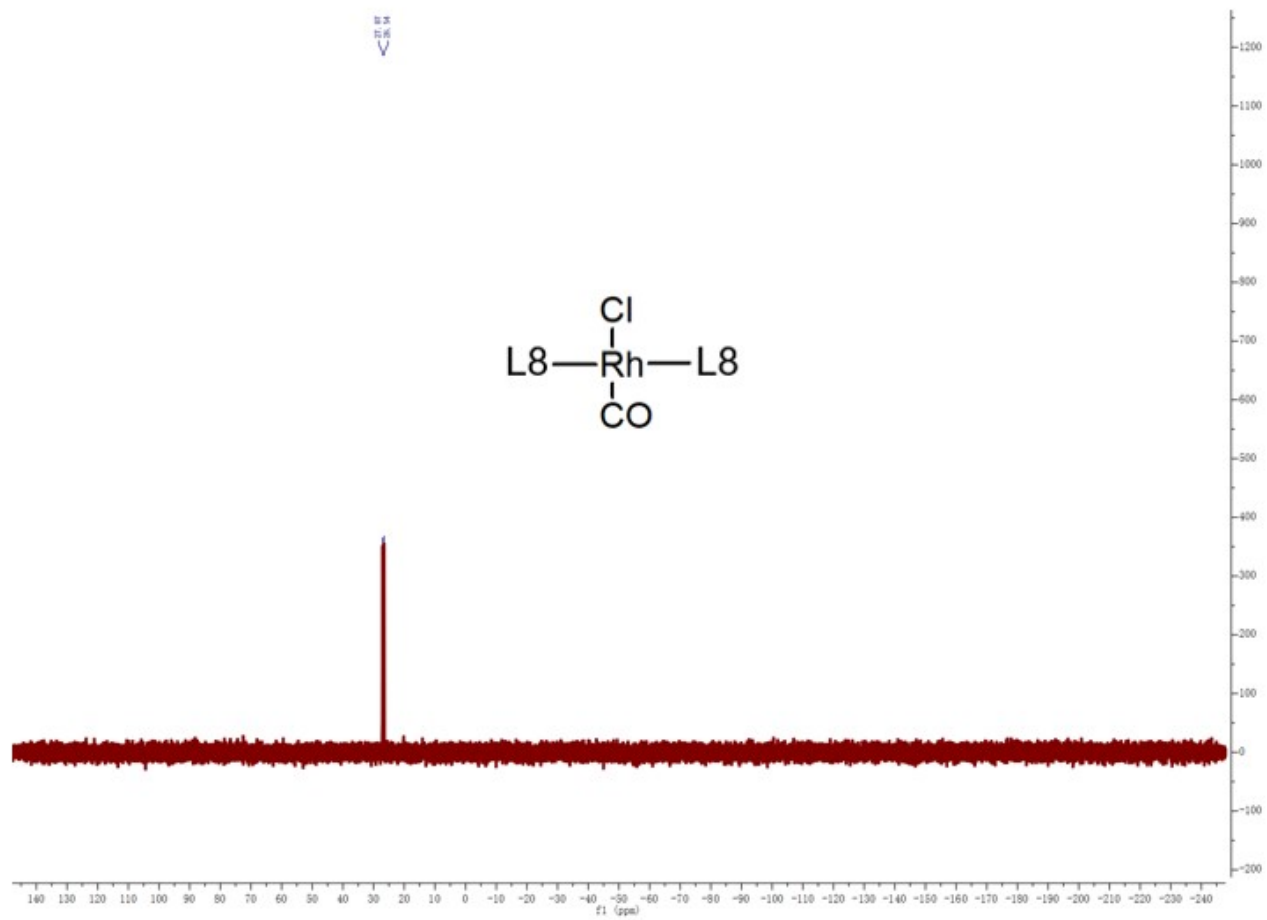

$^1\text{H}$  NMR of  $\text{RhClCO}(\text{L9})_2$  (600MHz,  $\text{CDCl}_3$ , 323K)

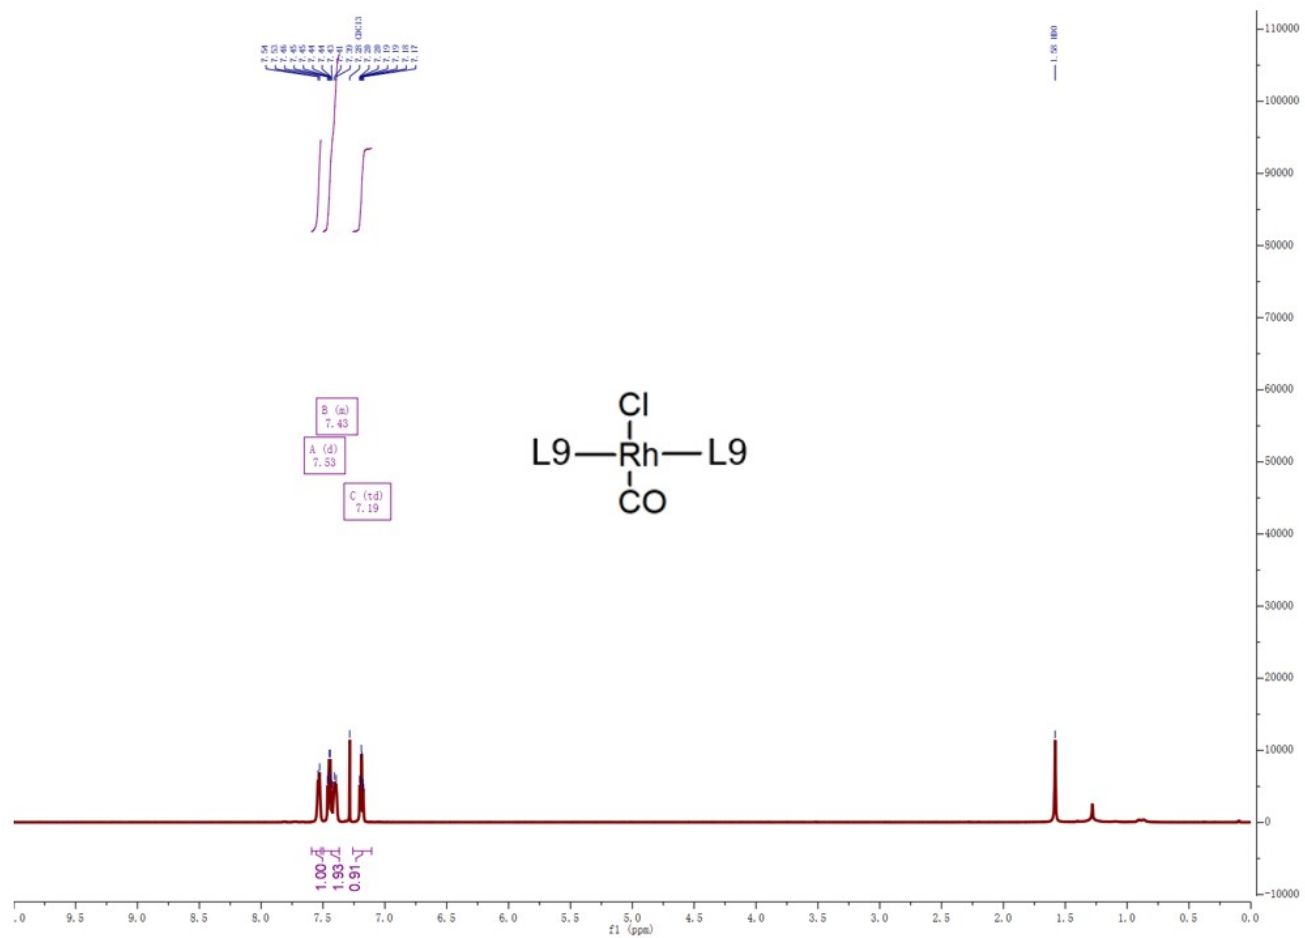

$^1\text{P}$  NMR of  $\text{RhClCO}(\text{L9})_2$  (243MHz,  $\text{CDCl}_3$ , 323K)

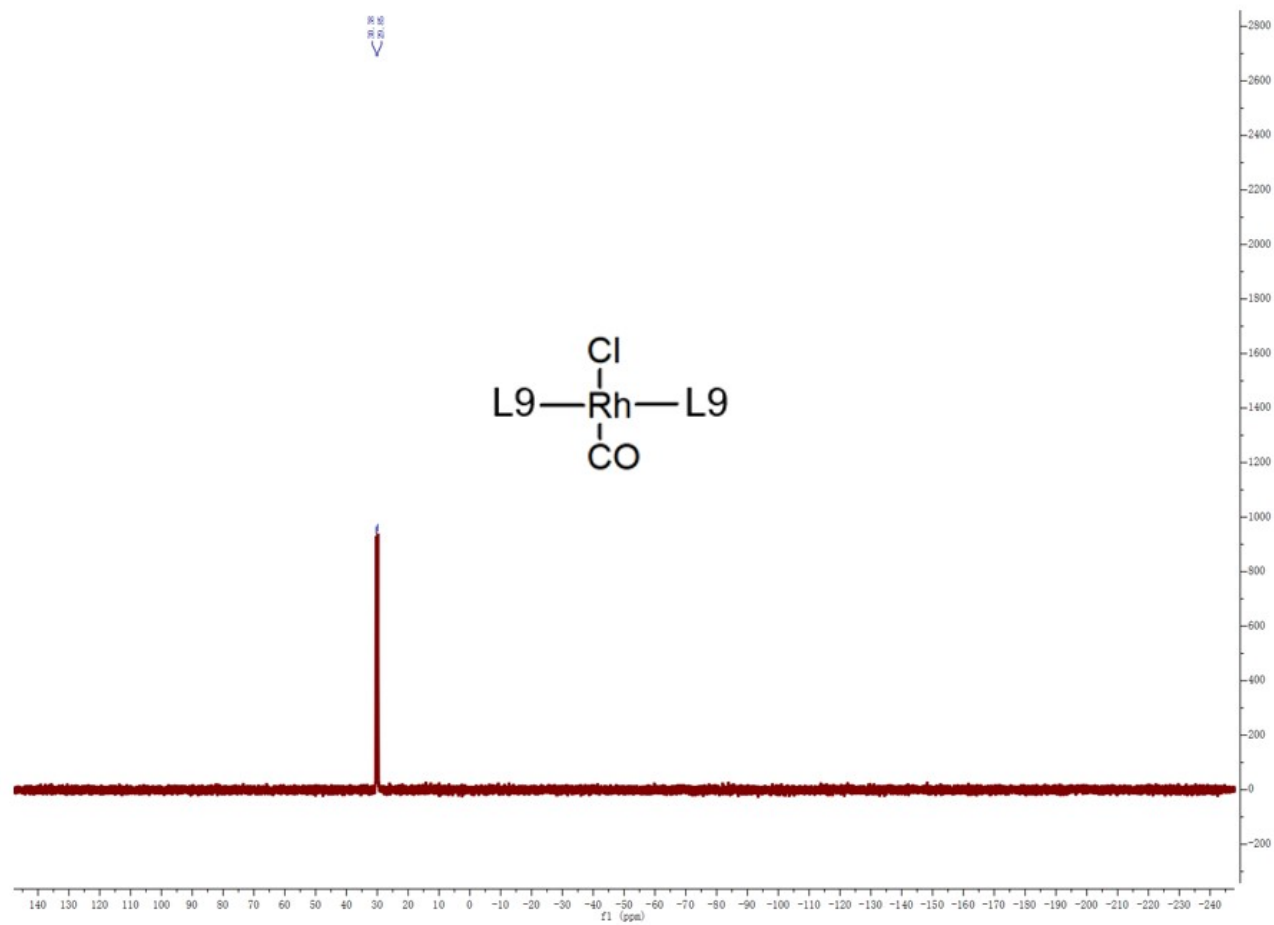



$^1\text{P}$  NMR of  $\text{RhClCO}(\text{L}10)_2$  (243MHz,  $\text{CDCl}_3$ , 323K)

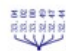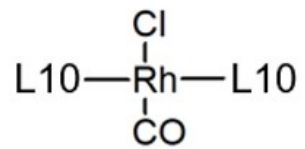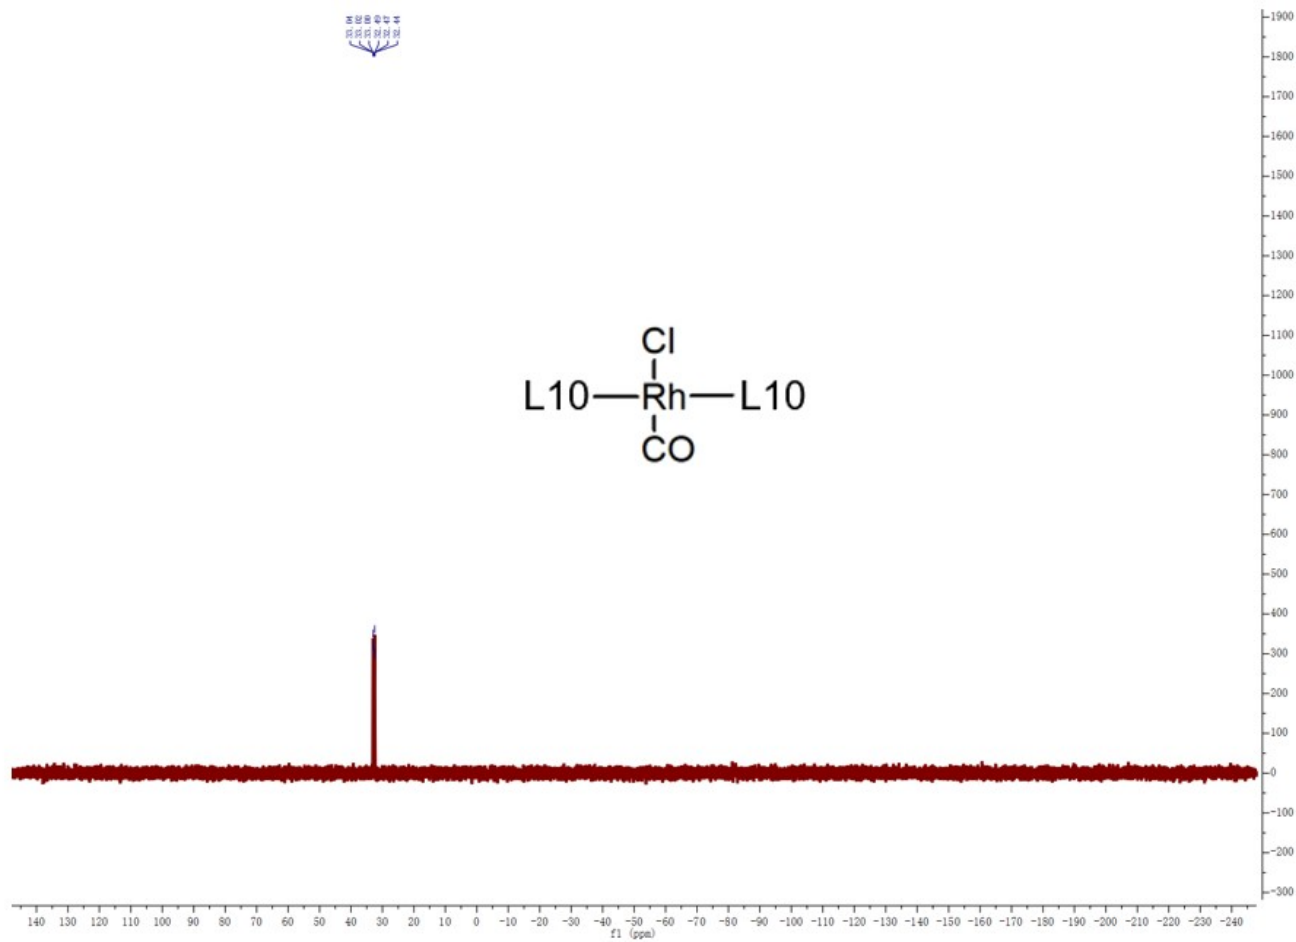

$^1\text{P}$  NMR of  $\text{RhClCO}(\text{L11})_2$  (243MHz,  $\text{CDCl}_3$ , 323K)

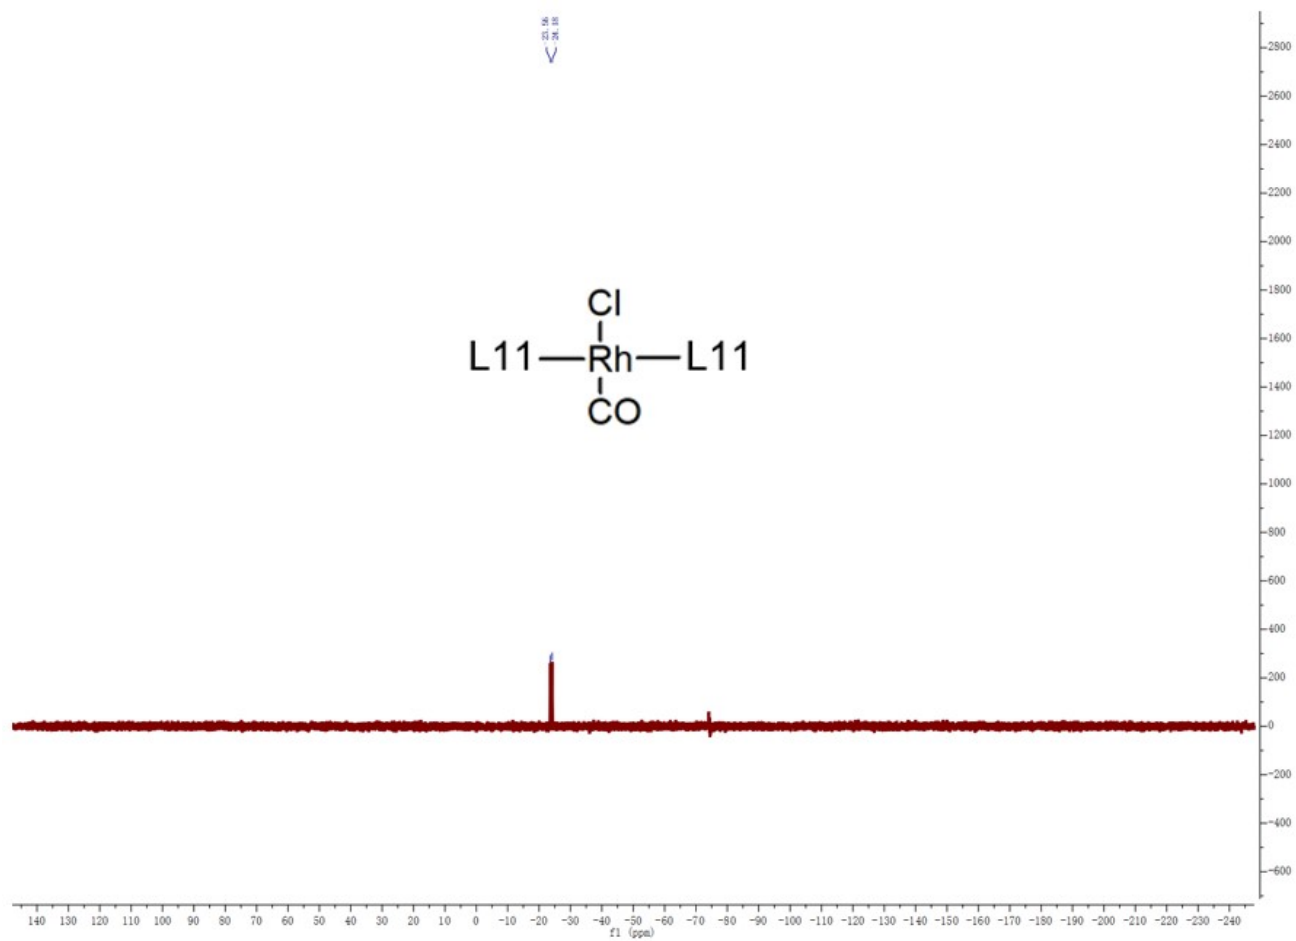

## 7.2 NMR spectra of functionalized EDOT polymers

$^1\text{H}$  NMR of PEE-OH with entry 4 of Table S3 [600MHz, dimethyl sulfoxide- $d_6$ / hydrazine hydrate- $d_6$  (v/v 100:1), 323K]

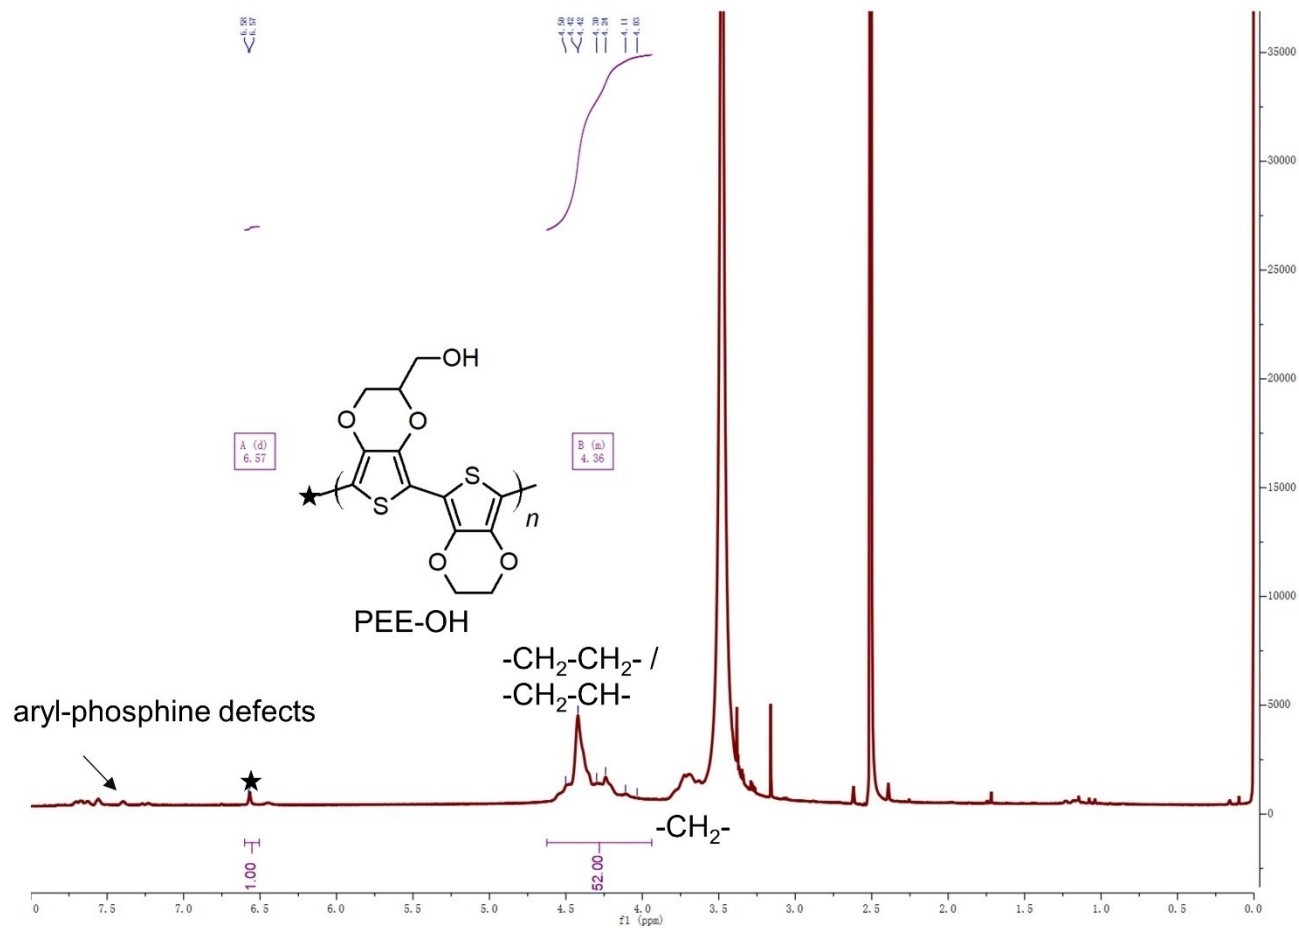

$^1\text{H}$  NMR of PEE-OH with entry 6 of Table S3 [600MHz, dimethyl sulfoxide- $d_6$ / hydrazine hydrate- $d_6$  (v/v 100:1), 323K]

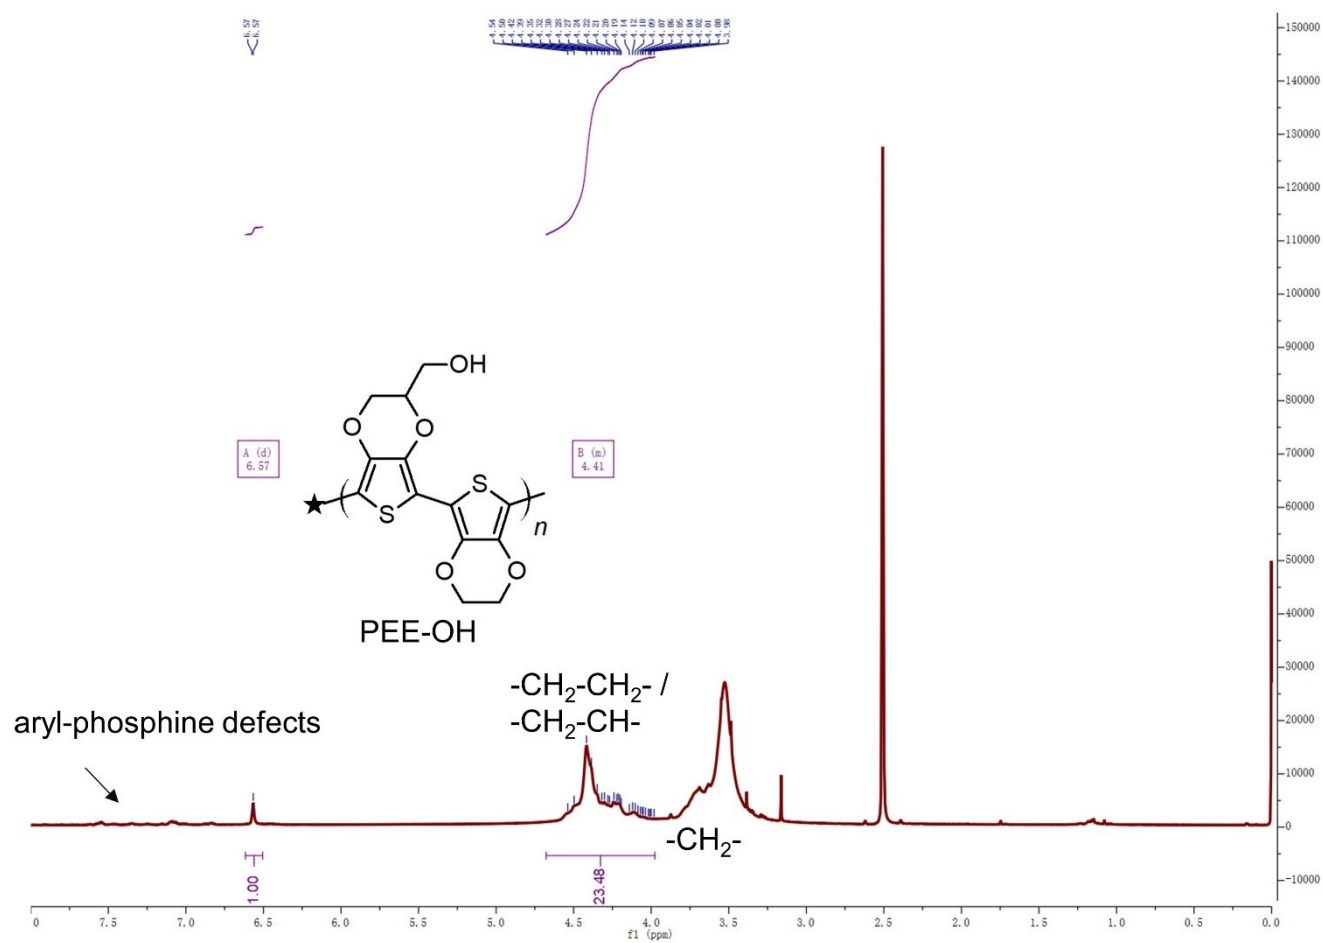

$^1\text{H}$  NMR of PEE-OH with entry 7 of Table S3 [600MHz, dimethyl sulfoxide- $d_6$ / hydrazine hydrate- $d_6$  (v/v 100:1), 323K]

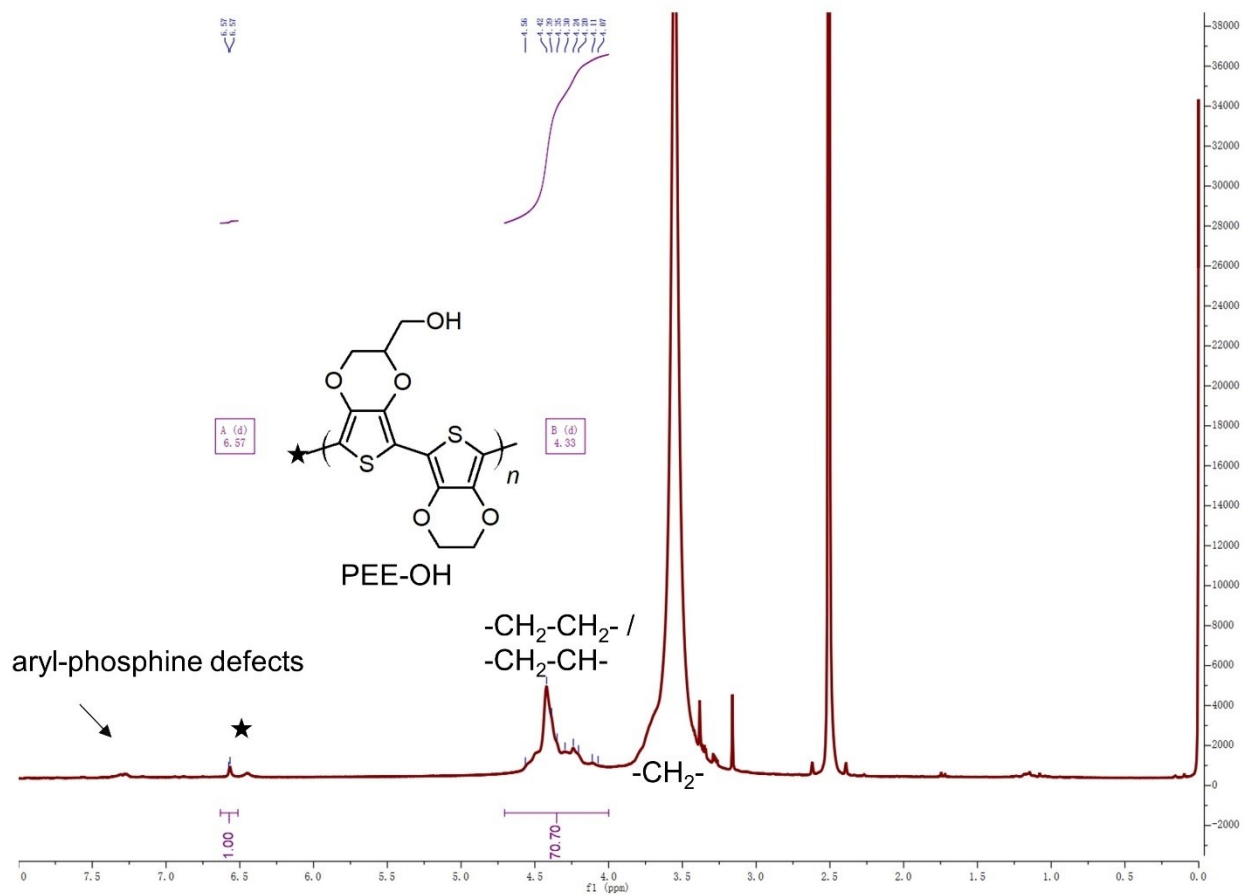

$^1\text{H}$  NMR of PEE-OH with entry 8 of Table S3[600MHz, dimethyl sulfoxide- $d_6$ / hydrazine hydrate- $d_6$  (v/v 100:1), 323K]

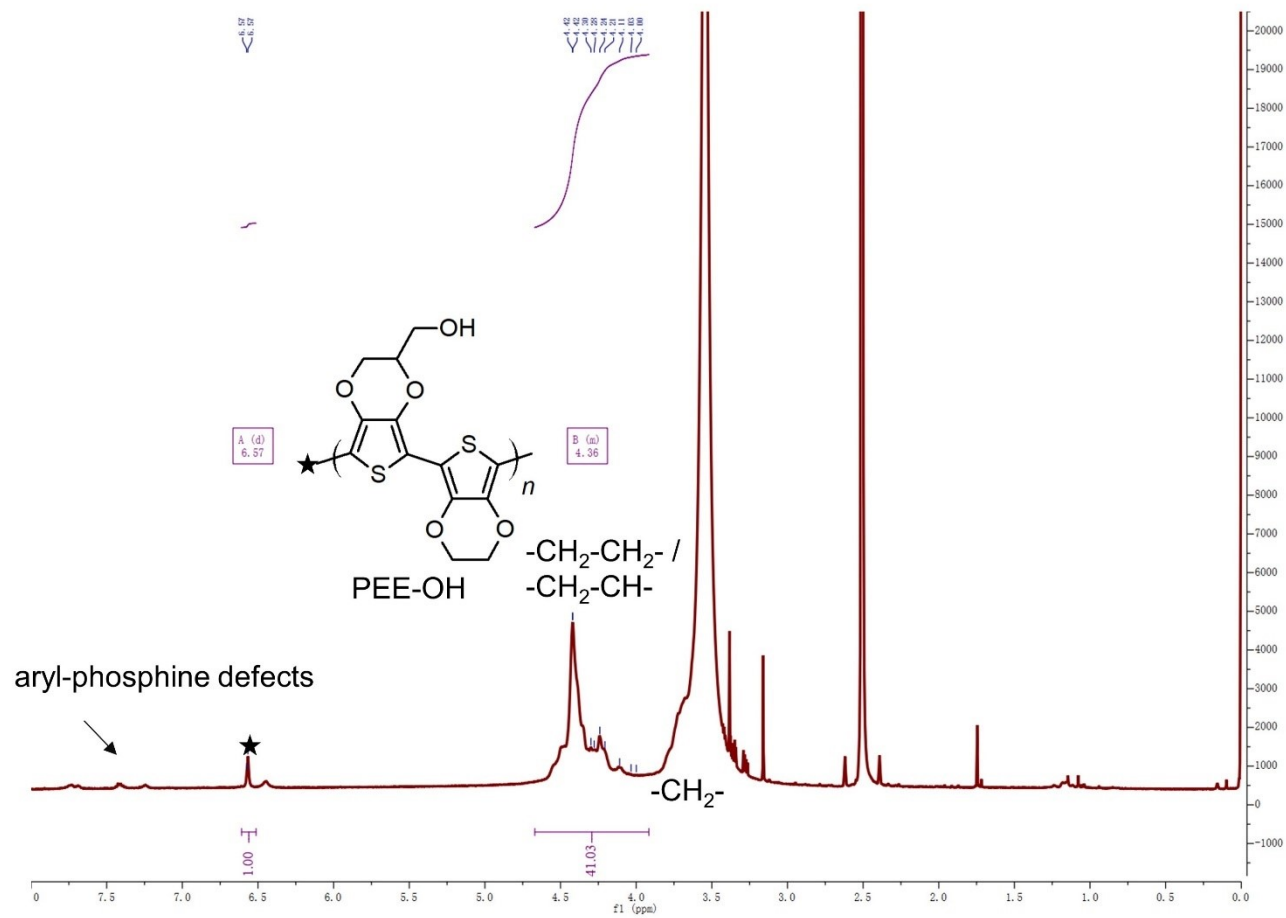

$^1\text{H}$  NMR of PEE-OH with entry 9 of Table S3 [600MHz, dimethyl sulfoxide- $d_6$ / hydrazine hydrate- $d_6$  (v/v 100:1), 323K]

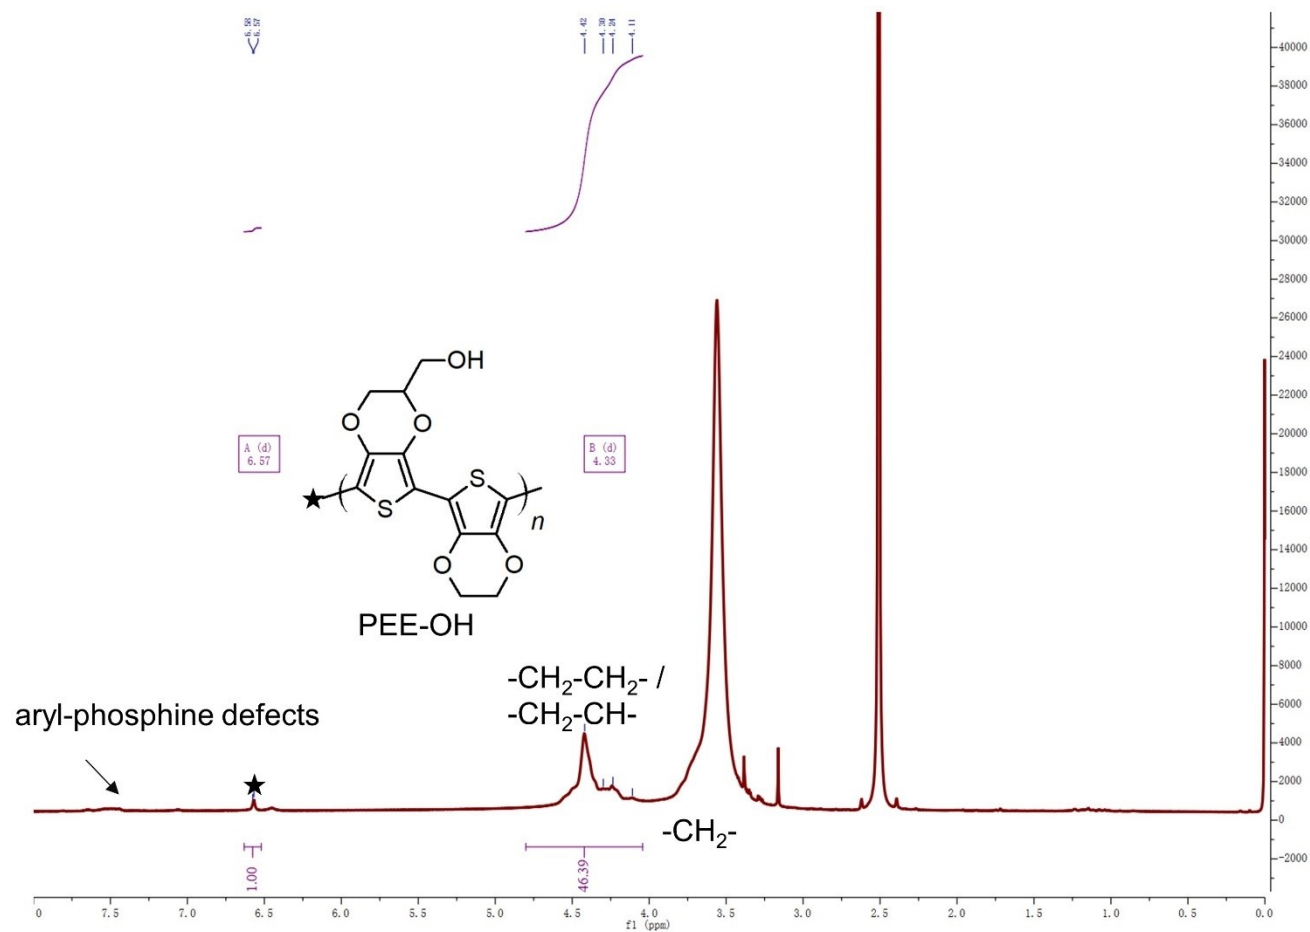

$^1\text{H}$  NMR of PEE-OH with entry 10 of Table S3 [600MHz, dimethyl sulfoxide- $d_6$ / hydrazine hydrate- $d_6$  (v/v 100:1), 323K]

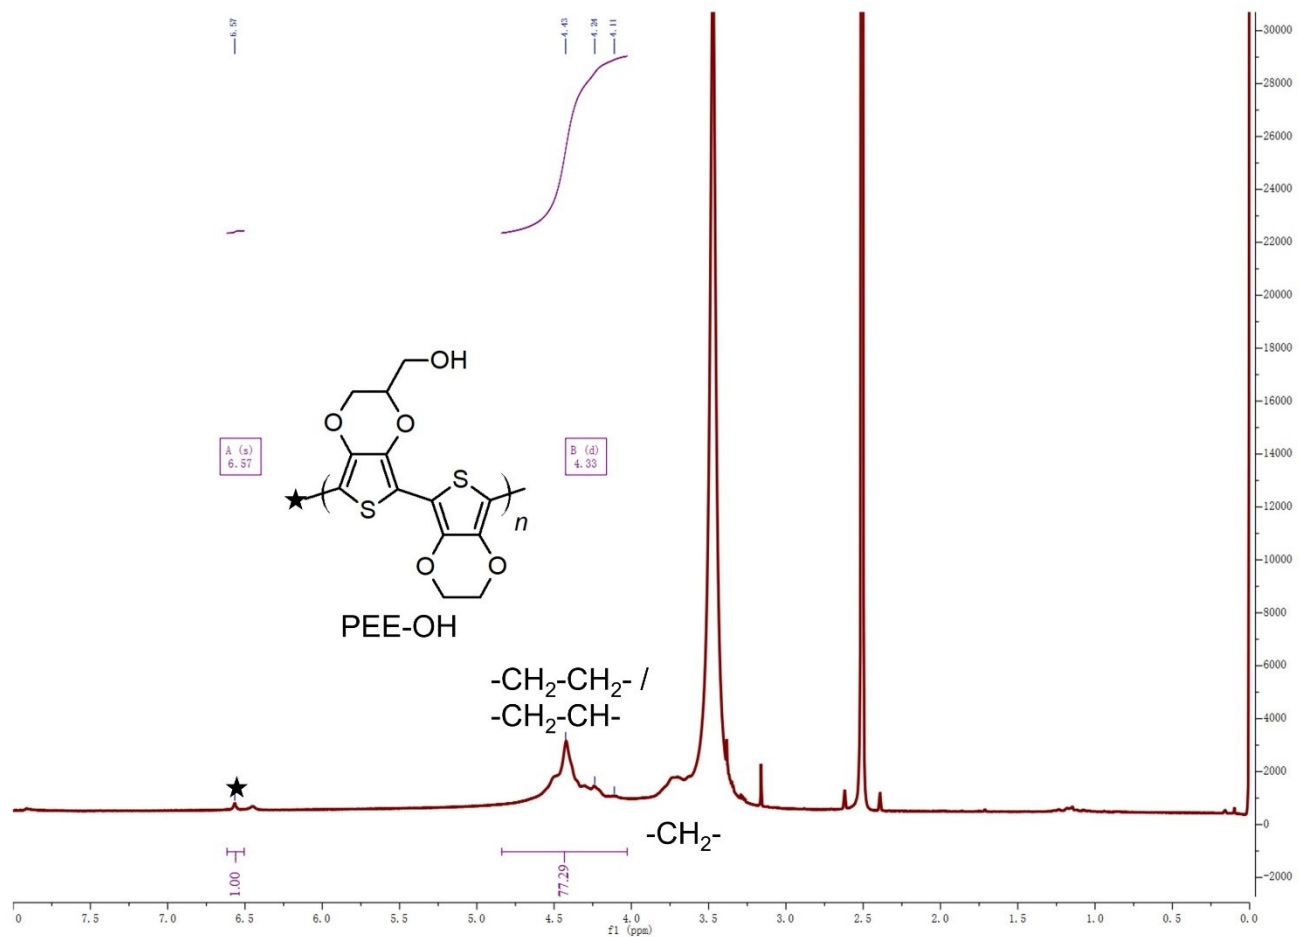



$^1\text{H}$  NMR of PEE-OH with entry 12 of Table S3 [600MHz, dimethyl sulfoxide- $d_6$ / hydrazine hydrate- $d_6$  (v/v 100:1), 323K]

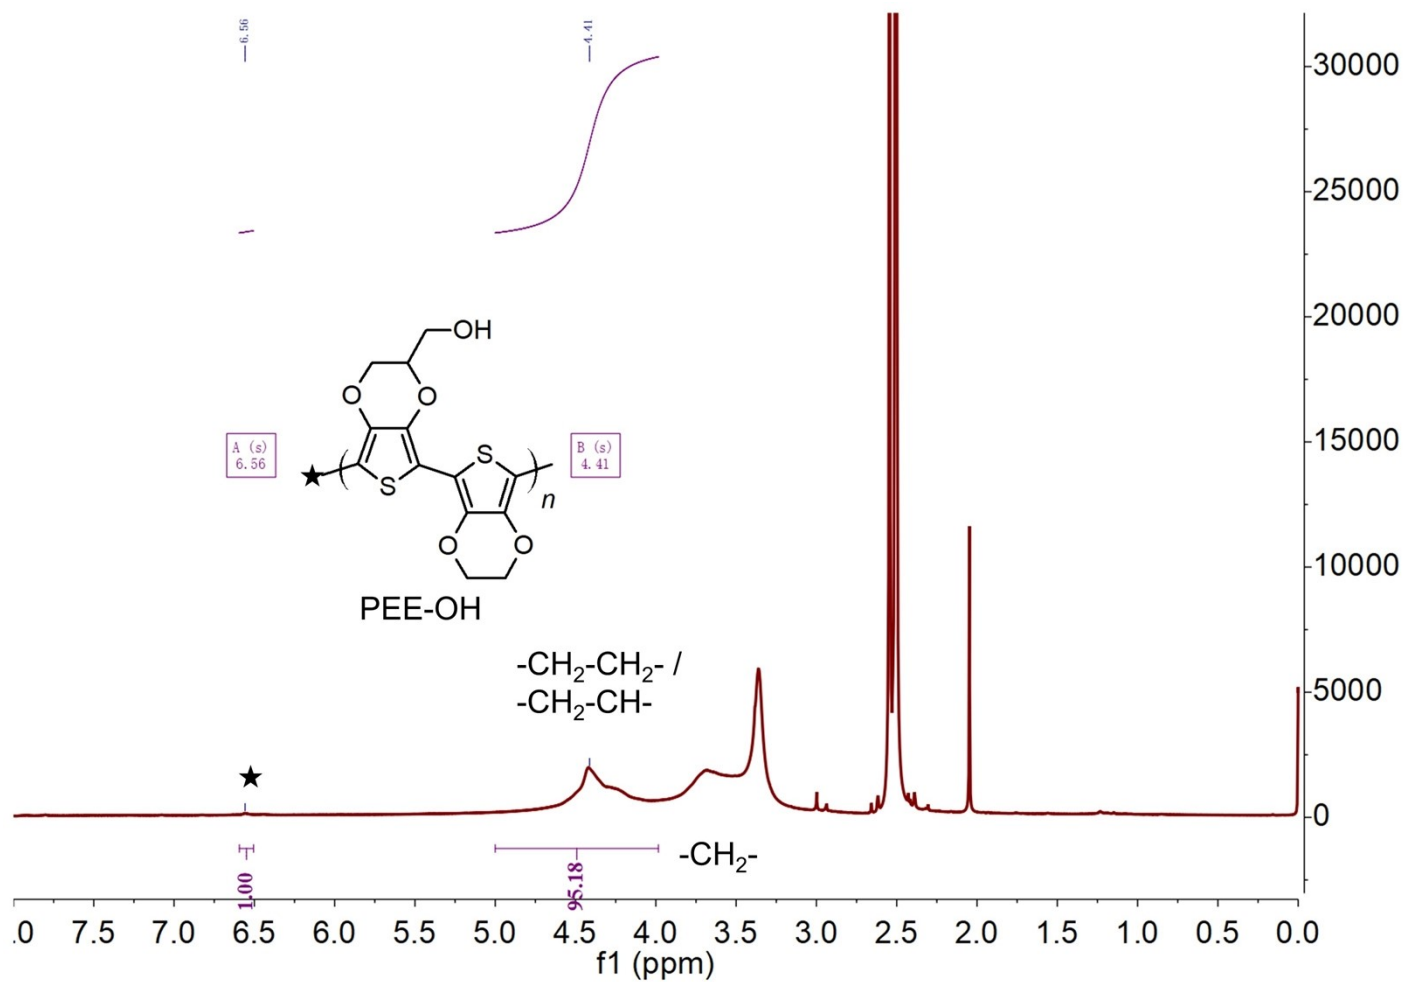

$^1\text{H}$  NMR of PEE-OH with entry 13 of Table S3 [600MHz, dimethyl sulfoxide- $d_6$ / hydrazine hydrate- $d_6$  (v/v 100:1), 323K]

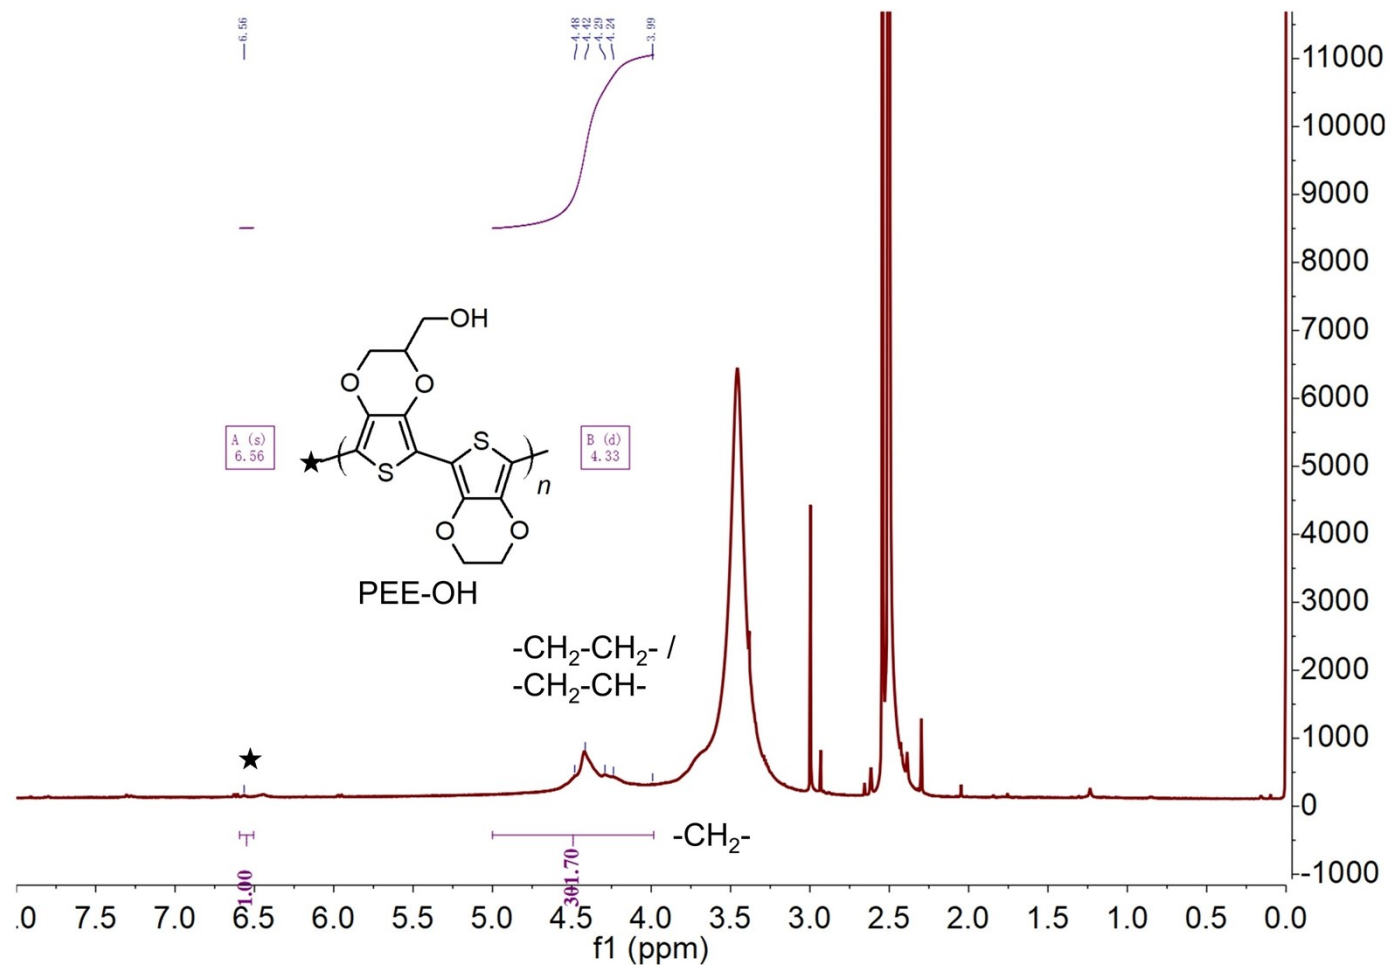

<sup>1</sup>H NMR of PEE-OH with entry 14 of Table S3 [600MHz, dimethyl sulfoxide-d<sub>6</sub>/ hydrazine hydrate-d<sub>6</sub> (v/v 100:1), 323K]

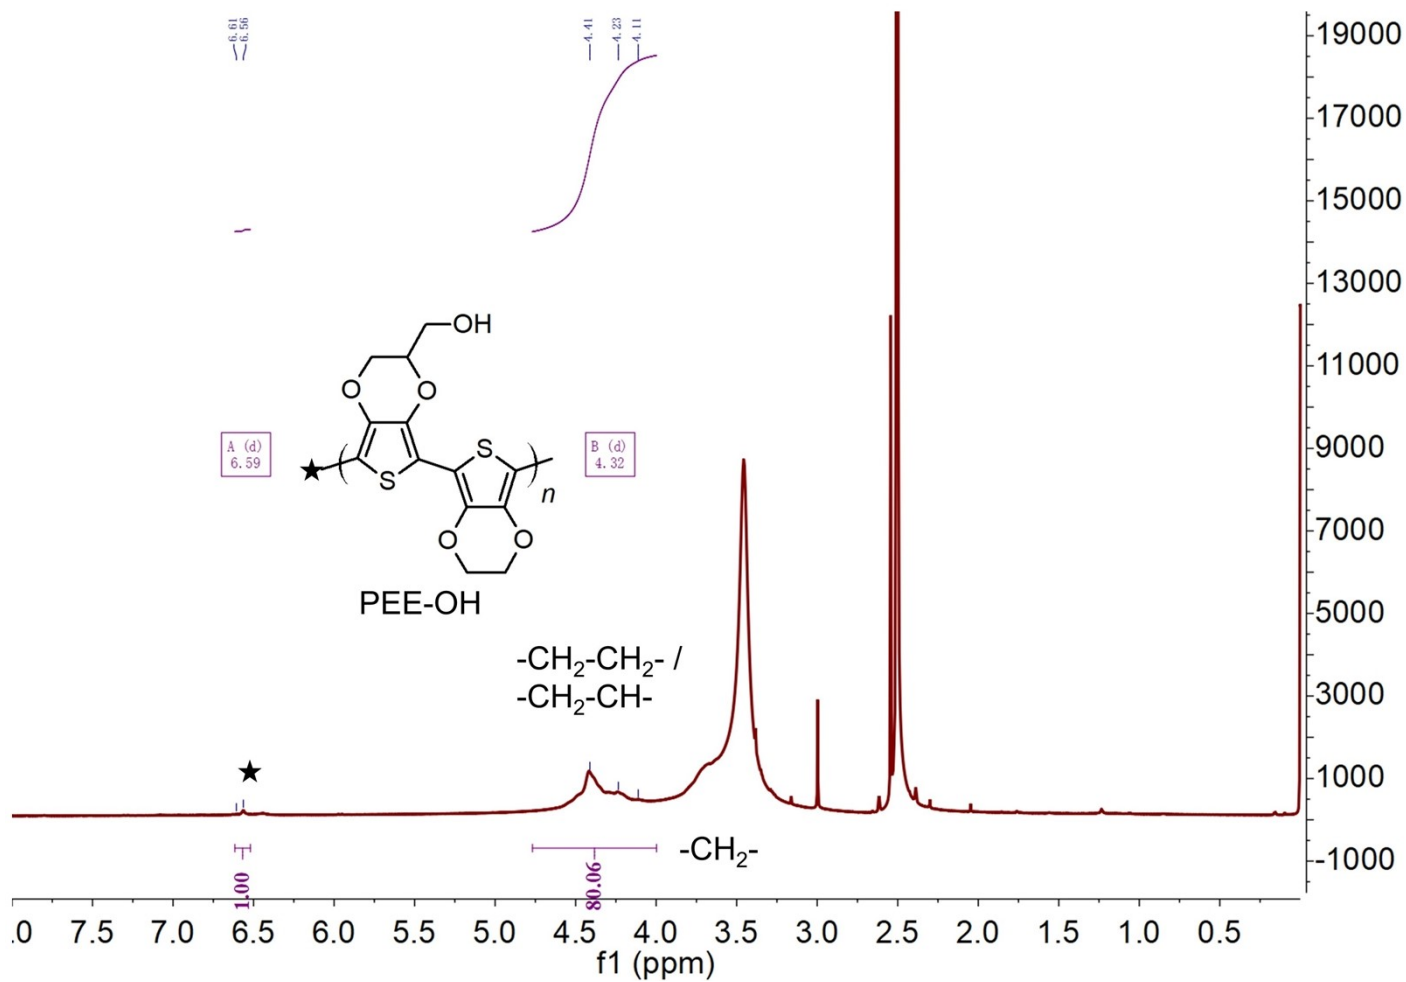

$^1\text{H}$  NMR of PEE-OH with entry 15 of Table S3 [600MHz, dimethyl sulfoxide-d<sub>6</sub>/ hydrazine hydrate-d<sub>6</sub> (v/v 100:1), 323K]

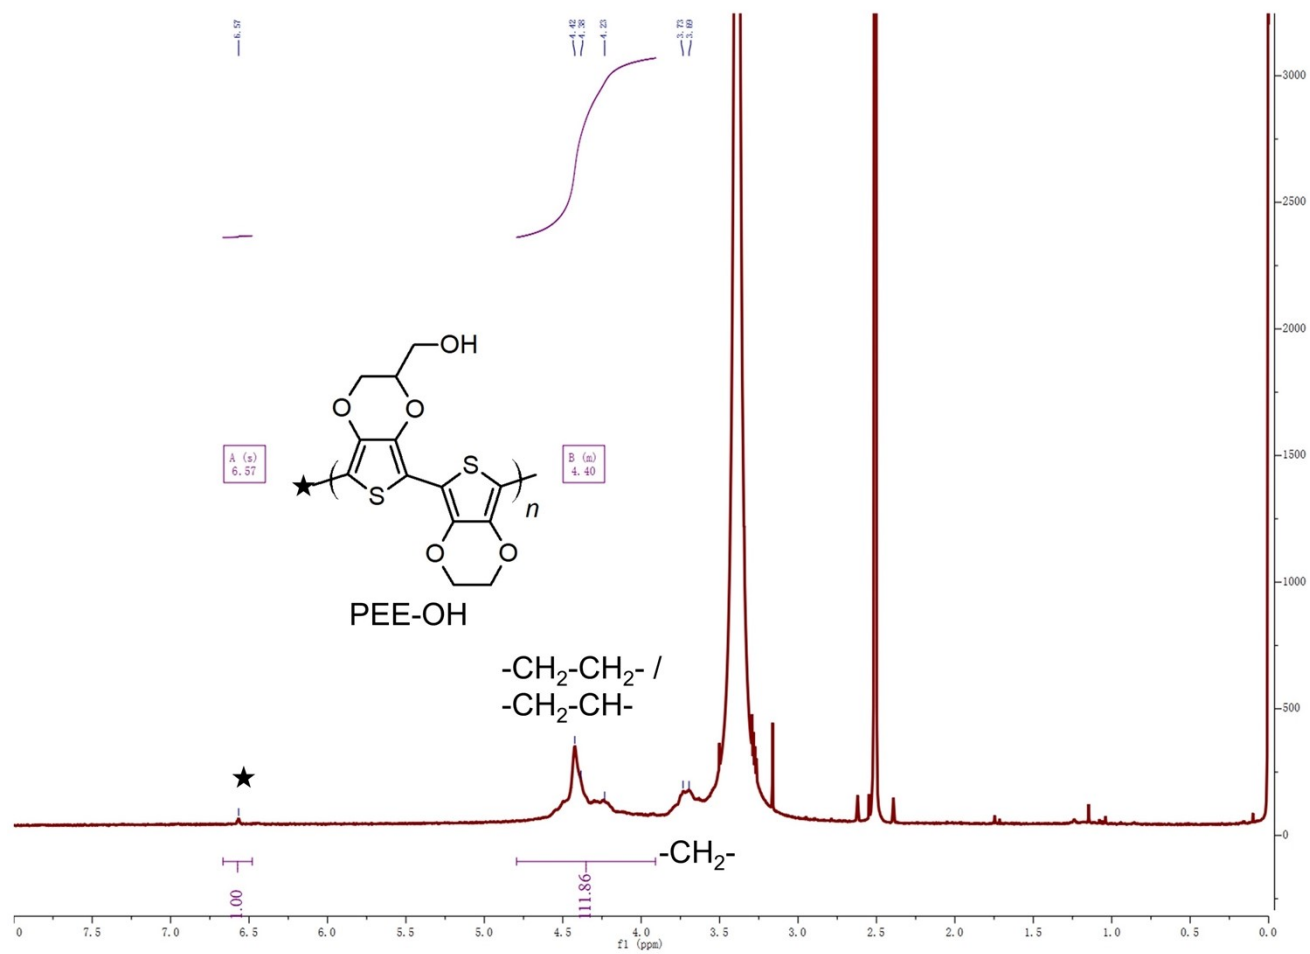

$^1\text{H}$  NMR of PEE-OH with entry 16 of Table S3 [600MHz, dimethyl sulfoxide- $d_6$ / hydrazine hydrate- $d_6$  (v/v 100:1), 323K]

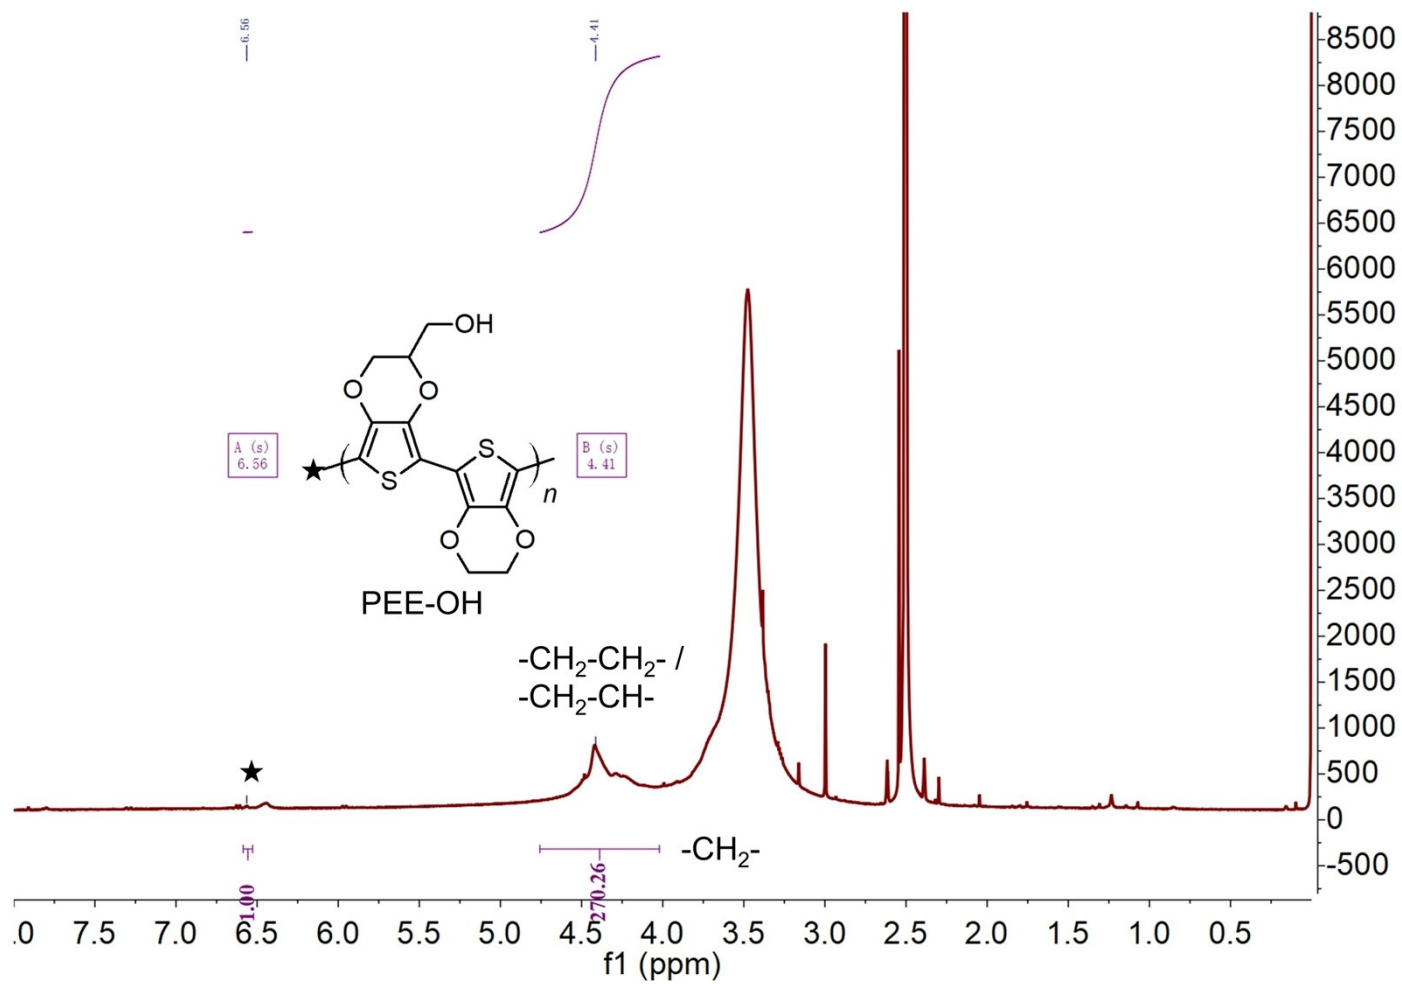

$^1\text{H}$  NMR of PEE-OH with entry 17 of Table S3 [600MHz, dimethyl sulfoxide- $d_6$ / hydrazine hydrate- $d_6$  (v/v 100:1), 323K]

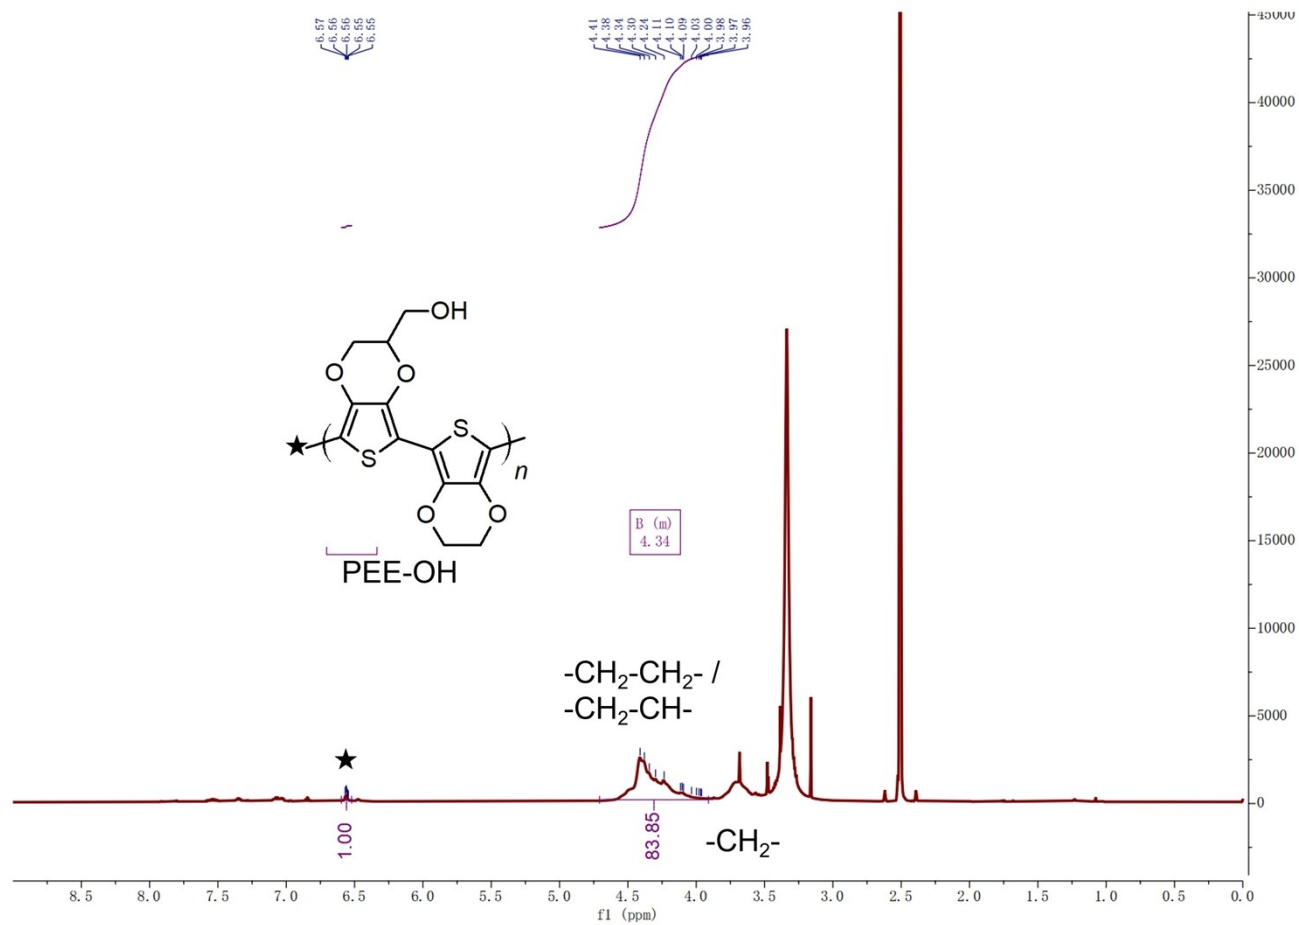

$^1\text{H}$  NMR of PEE-OH with entry 18 of Table S3 [600MHz, dimethyl sulfoxide- $d_6$ / hydrazine hydrate- $d_6$  (v/v 100:1), 323K]

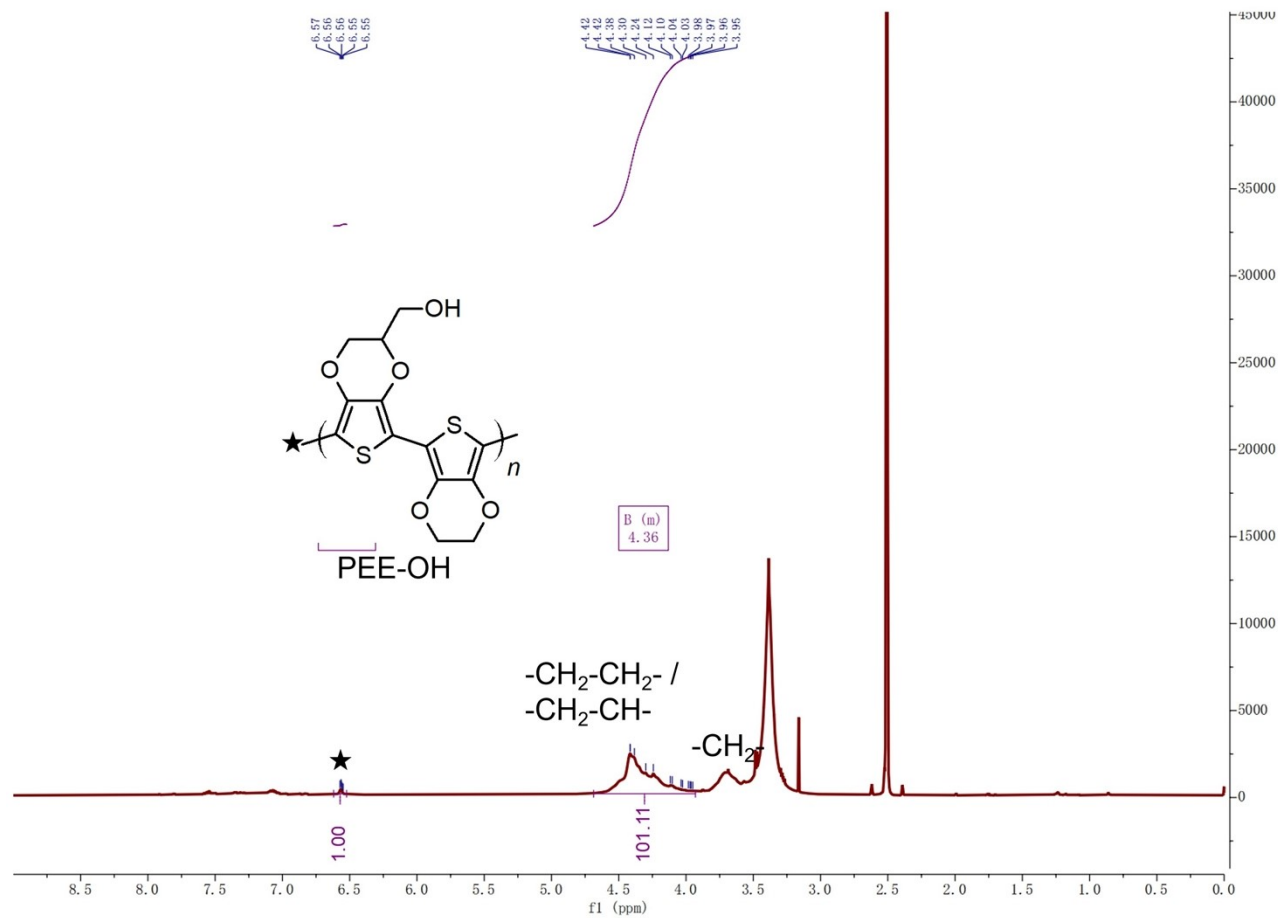

$^1\text{H}$  NMR of PEE-OH with entry 19 of Table S3 [600MHz, dimethyl sulfoxide- $d_6$ / hydrazine hydrate- $d_6$  (v/v 100:1), 323K]

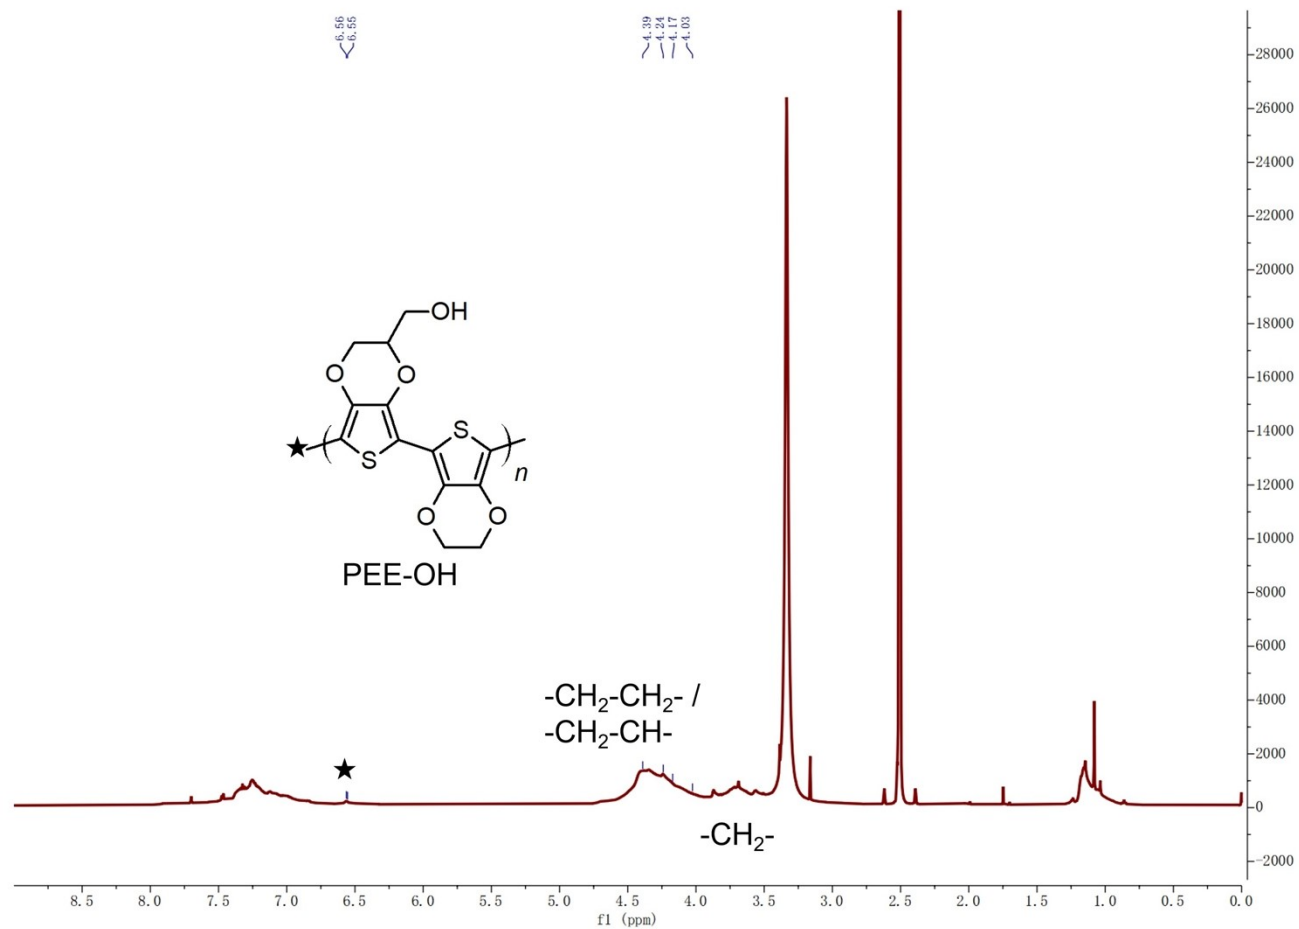

$^1\text{H}$  NMR of PPE-OH with entry 3 of Table S4 [600MHz, dimethyl sulfoxide-d<sub>6</sub>, 323K]

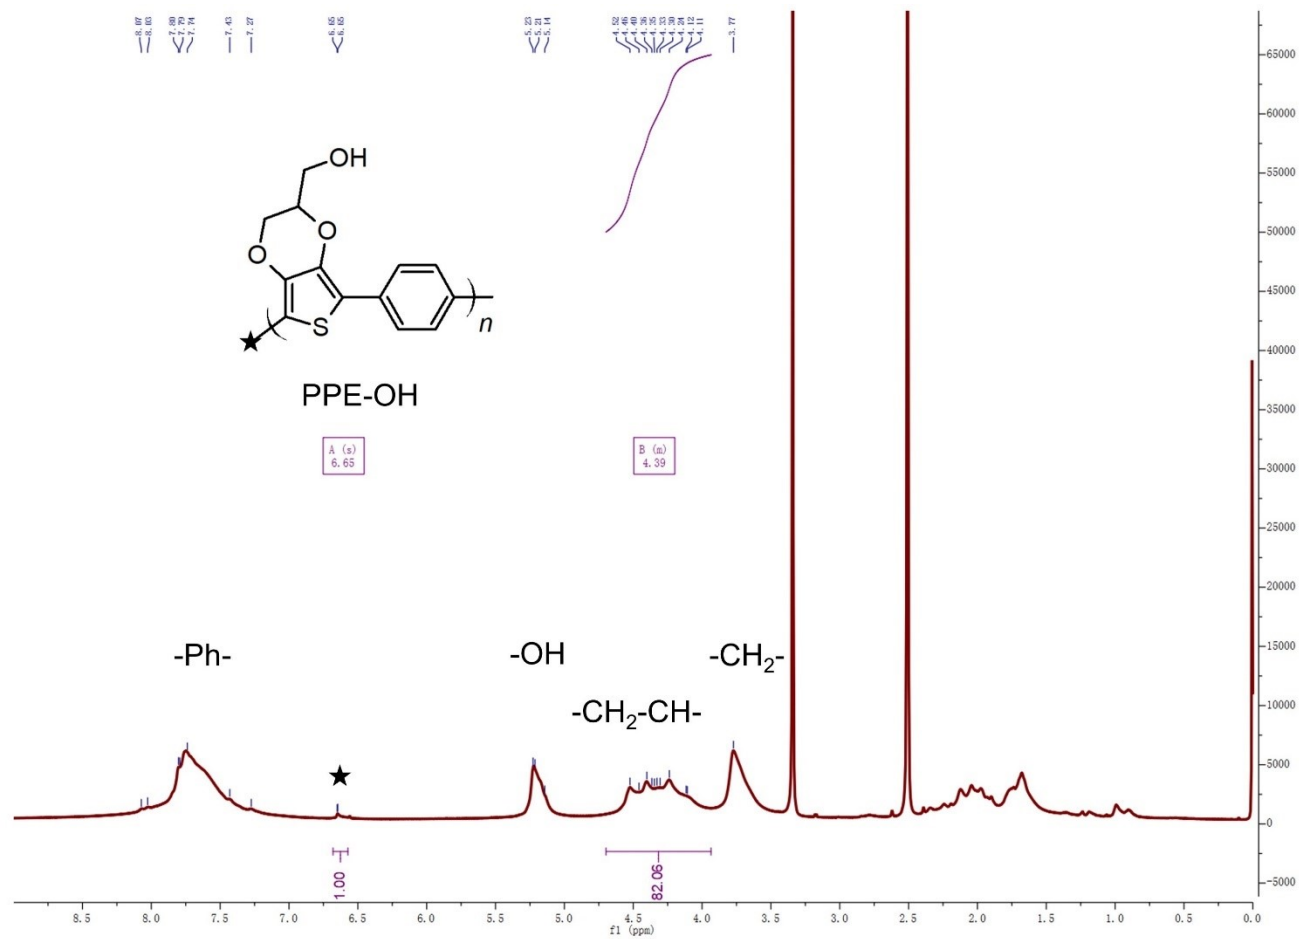

$^1\text{H}$  NMR of PPE-OH with entry 5 of Table S4 [600MHz, dimethyl sulfoxide-d<sub>6</sub>, 323K]

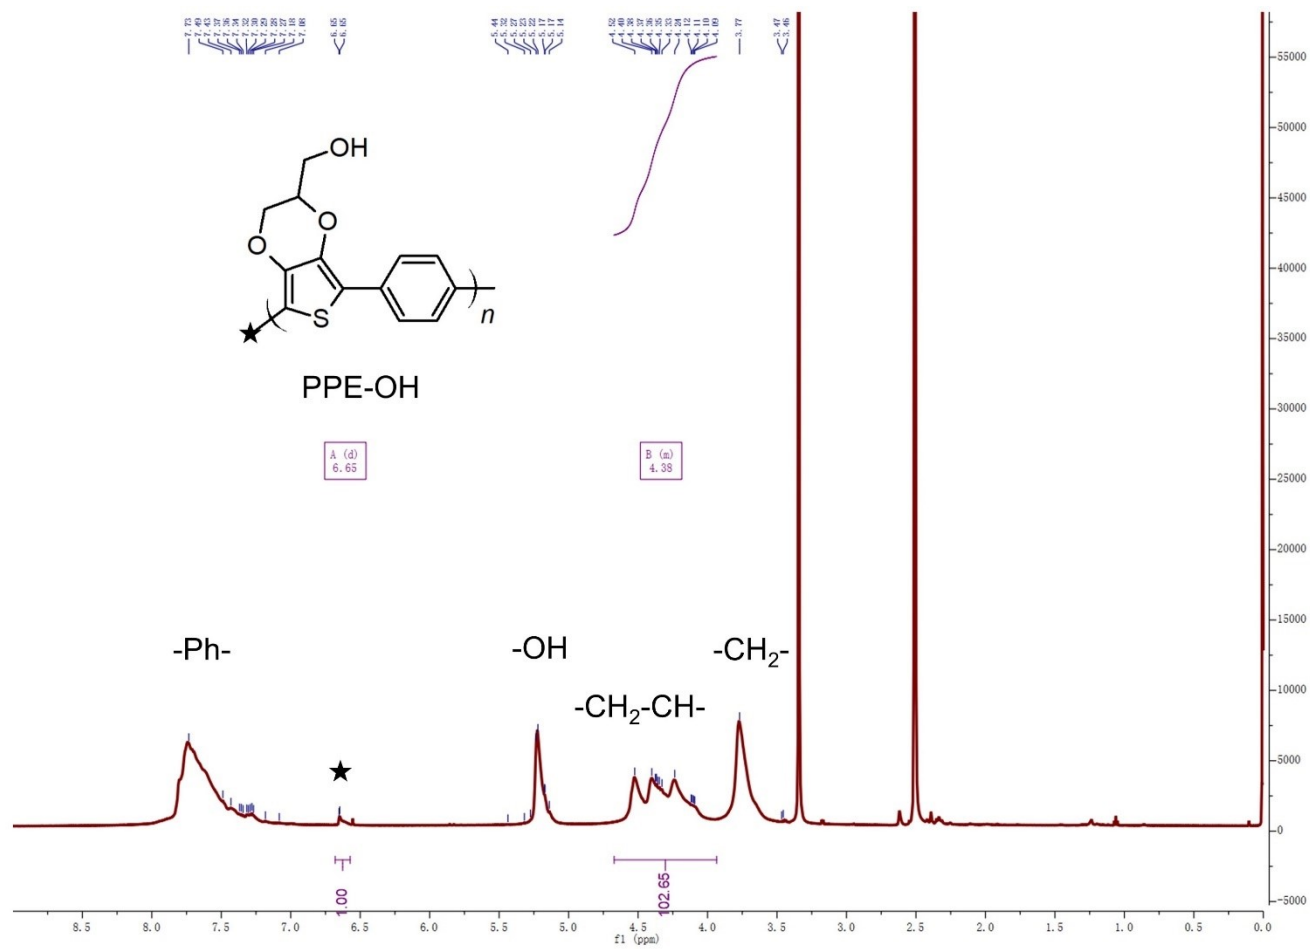

$^1\text{H}$  NMR of PPE-OH with entry 6 of Table S4 [600MHz, dimethyl sulfoxide-d<sub>6</sub>, 323K]

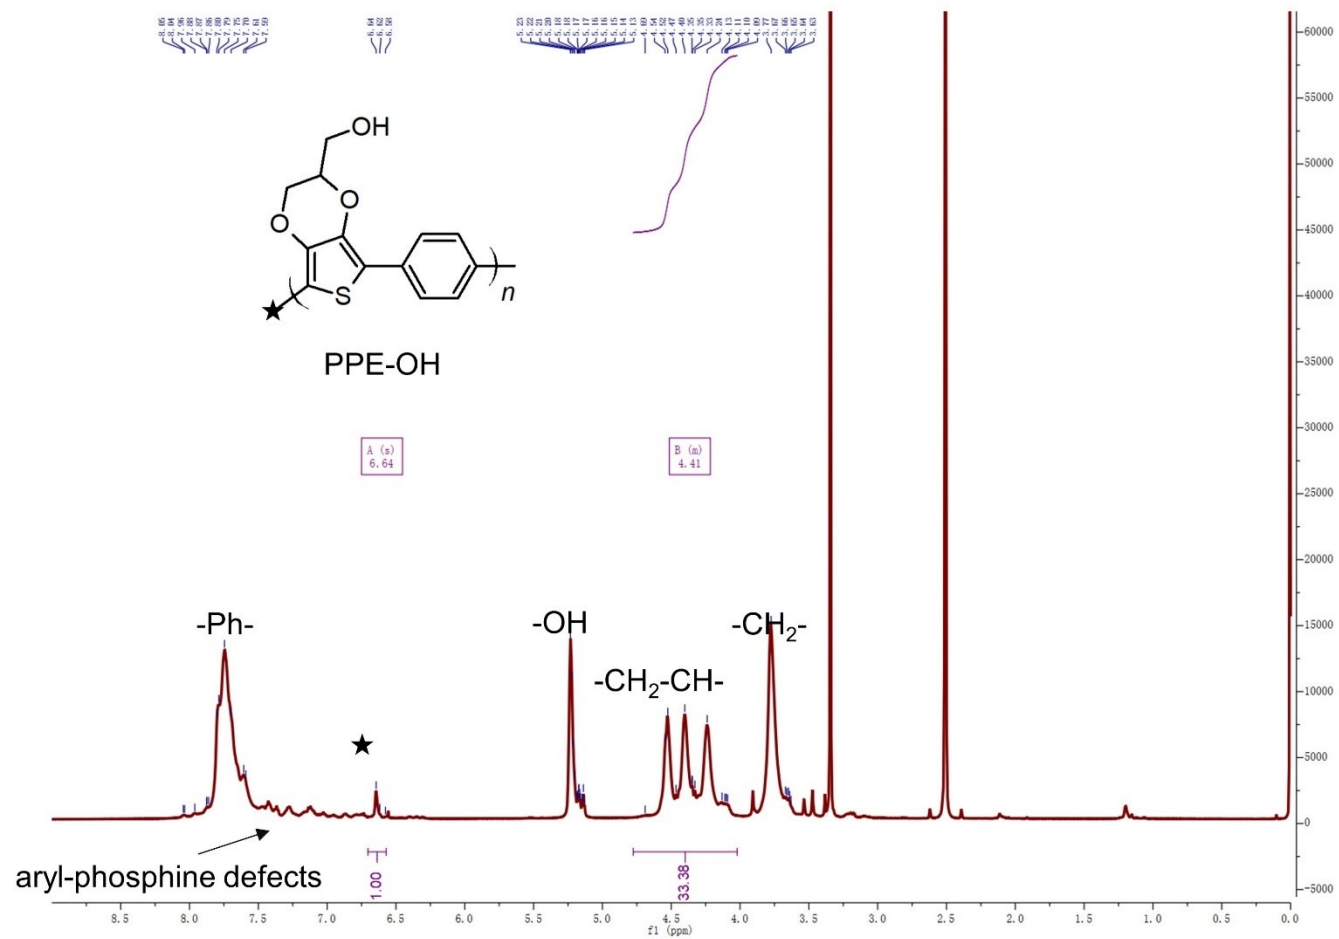

$^1\text{H}$  NMR of PPE-OH with entry 7 of Table S4 [600MHz, dimethyl sulfoxide-d<sub>6</sub>, 323K]

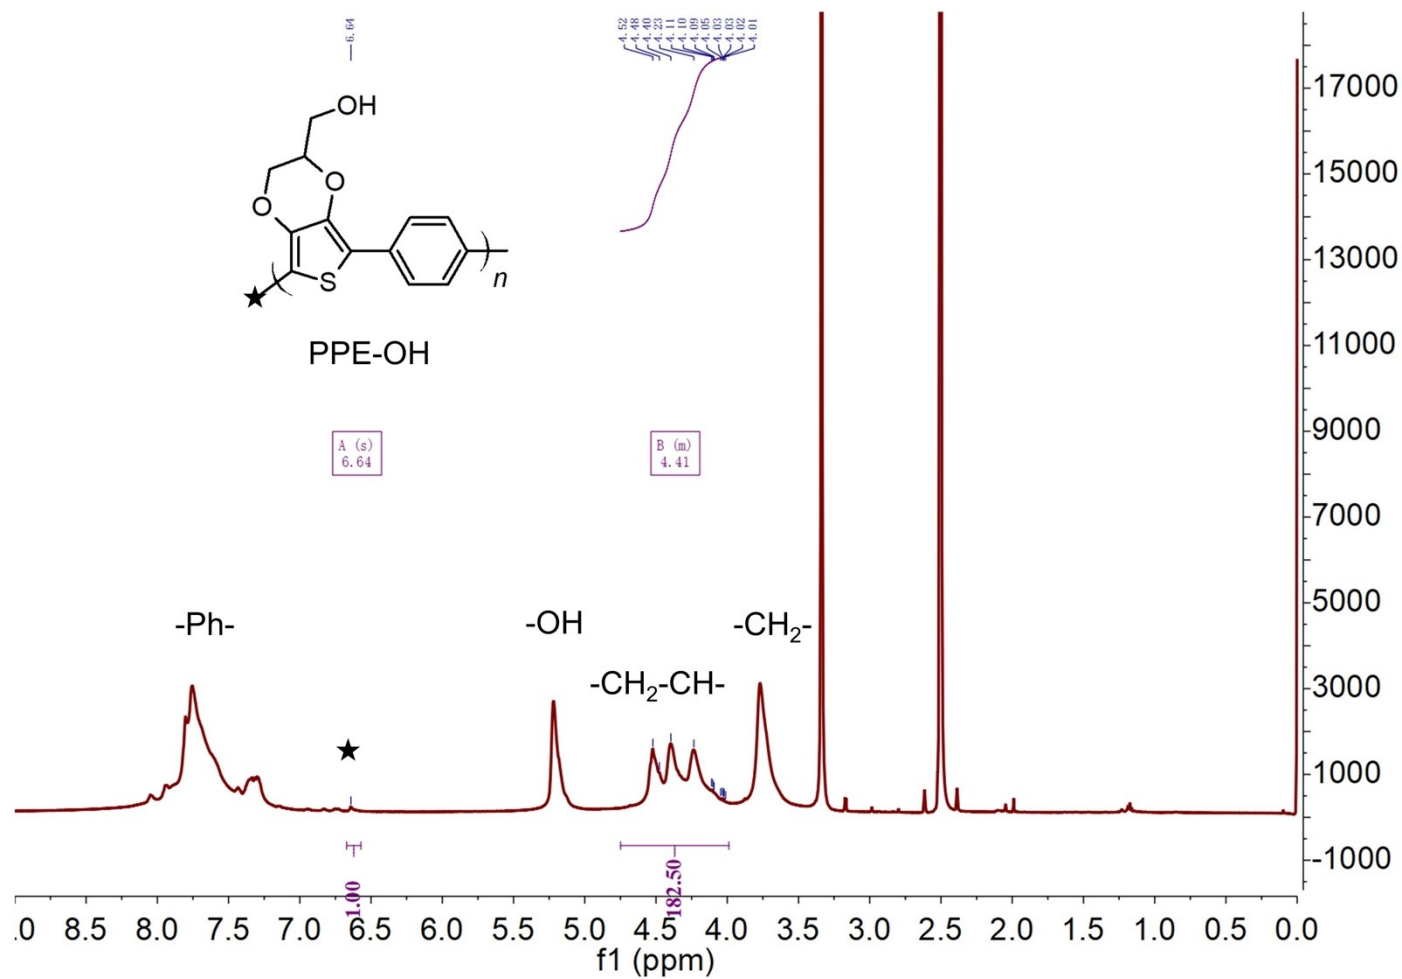

$^1\text{H}$  NMR of PPE-OH with entry 8 of Table S4 [600MHz, dimethyl sulfoxide-d<sub>6</sub>, 323K]

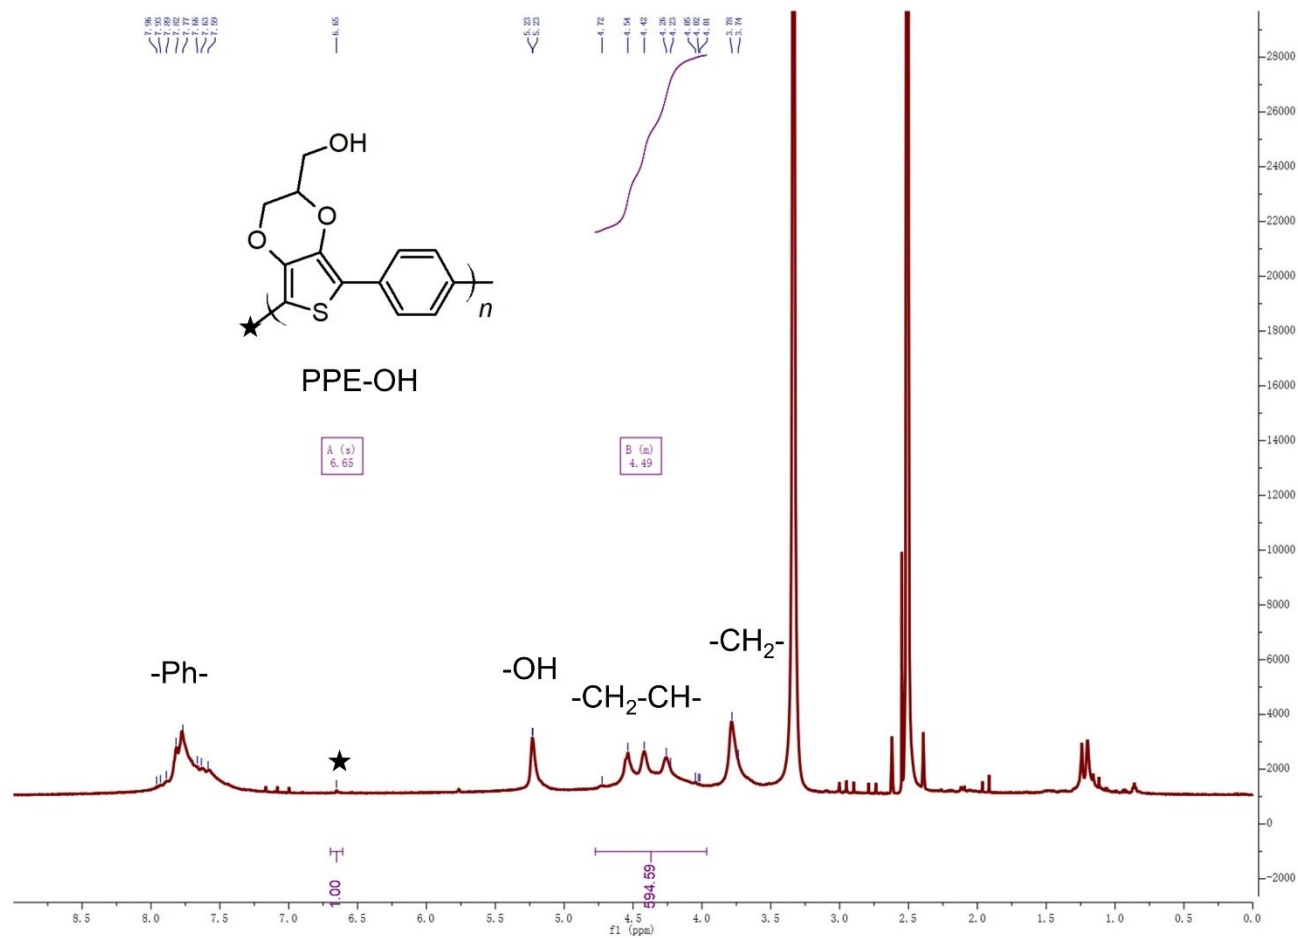

$^1\text{H}$  NMR of PPE-OH with entry 9 of Table S4 [600MHz, dimethyl sulfoxide-d<sub>6</sub>, 323K]

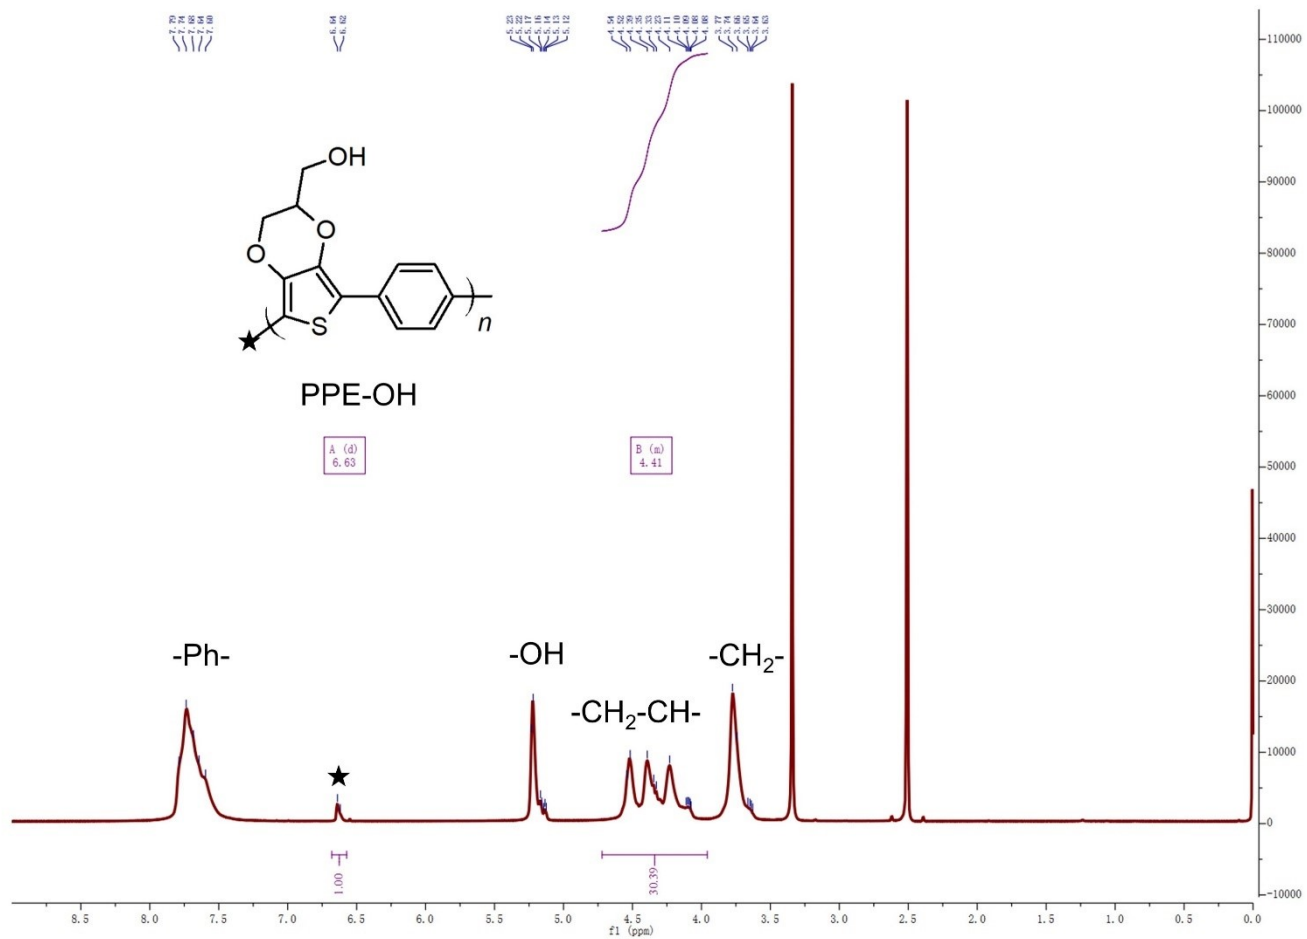

$^1\text{H}$  NMR of PPE-OH with entry 10 of Table S4 [600MHz, dimethyl sulfoxide-d<sub>6</sub>, 323K]

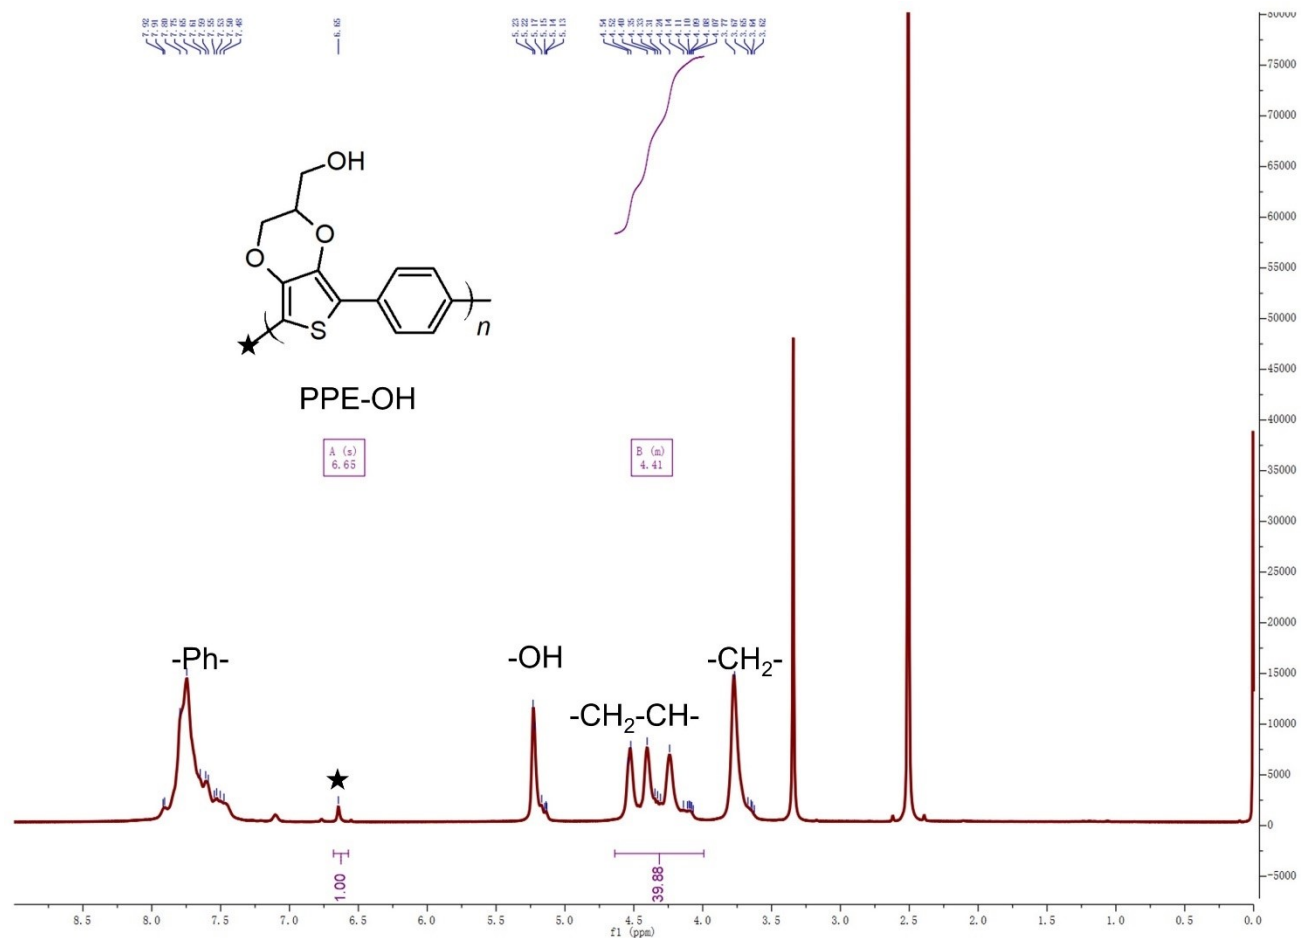

$^1\text{H}$  NMR of PPE-OH with entry 11 of Table S4 [600MHz, dimethyl sulfoxide-d<sub>6</sub>, 323K]

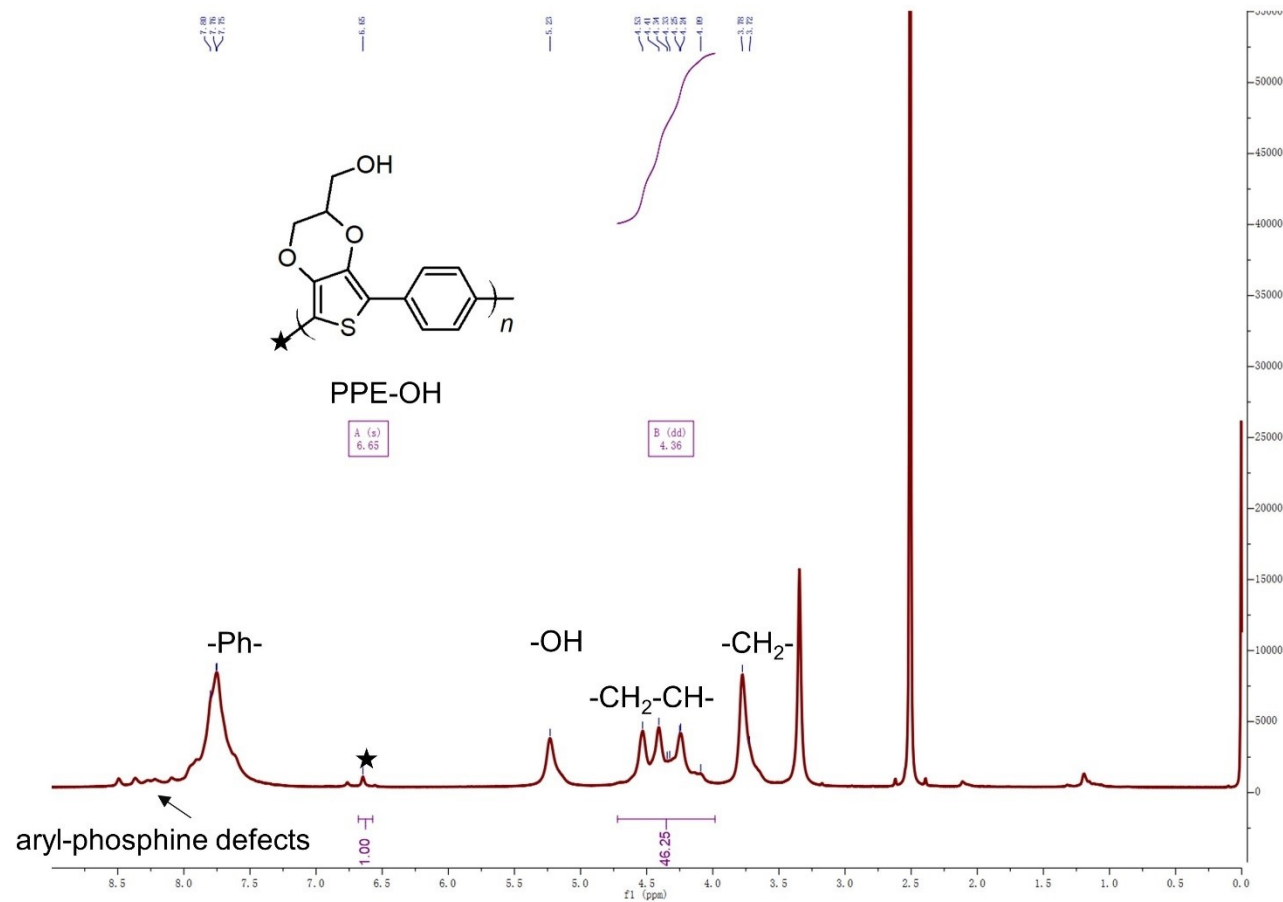

<sup>1</sup>H NMR of PPE-OH with entry 12 of Table S4 [600MHz, dimethyl sulfoxide-d6, 323K]

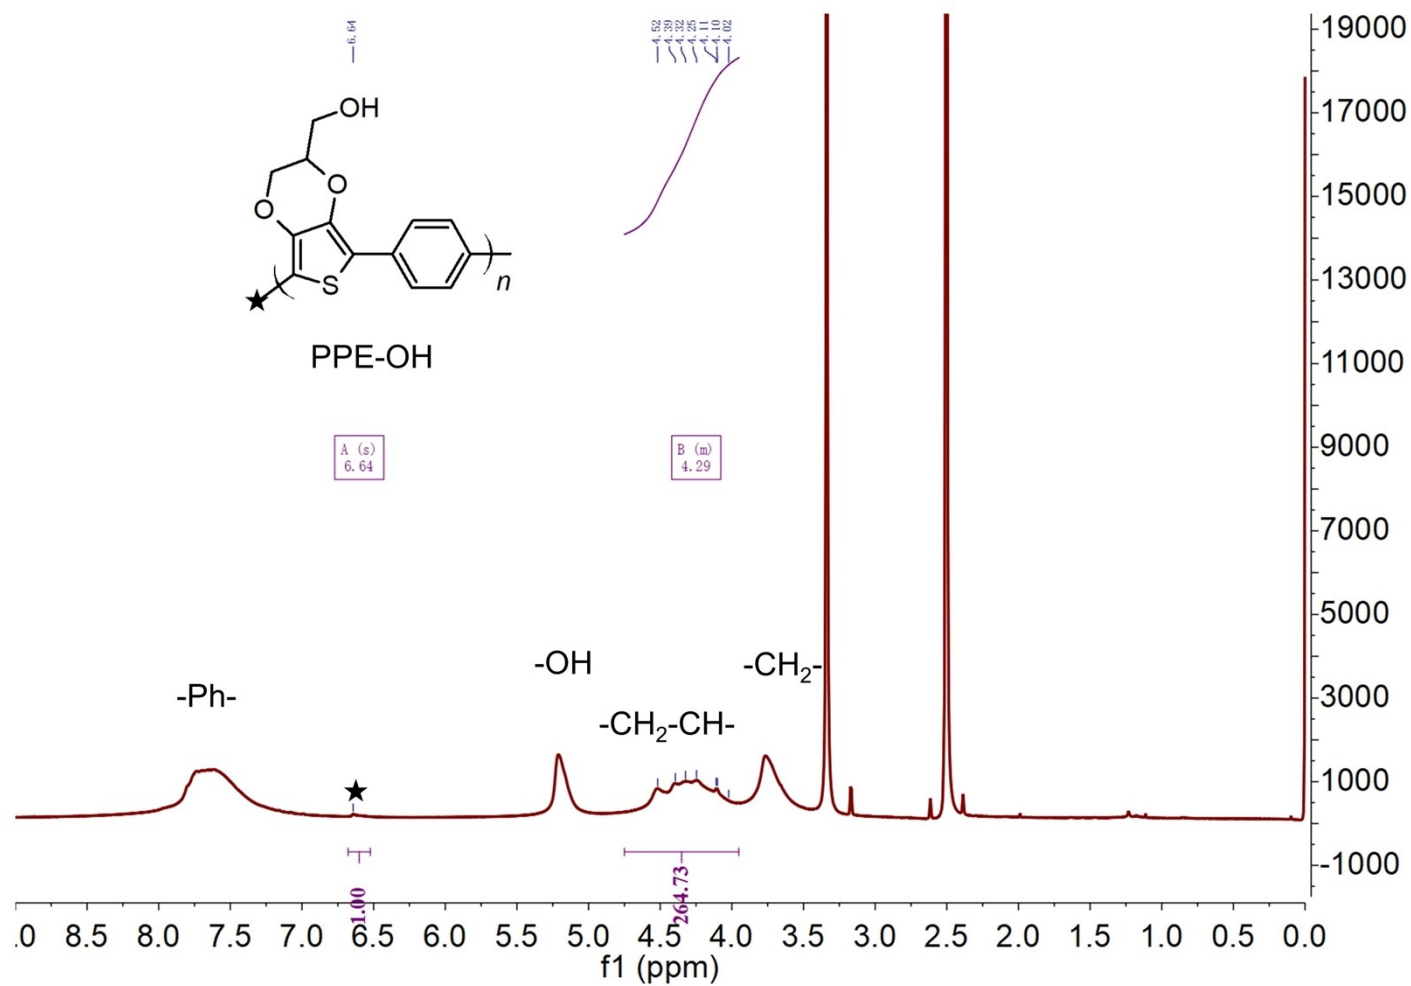

$^1\text{H}$  NMR of PPE-OH with entry 13 of Table S4 [600MHz, dimethyl sulfoxide-d<sub>6</sub>, 323K]

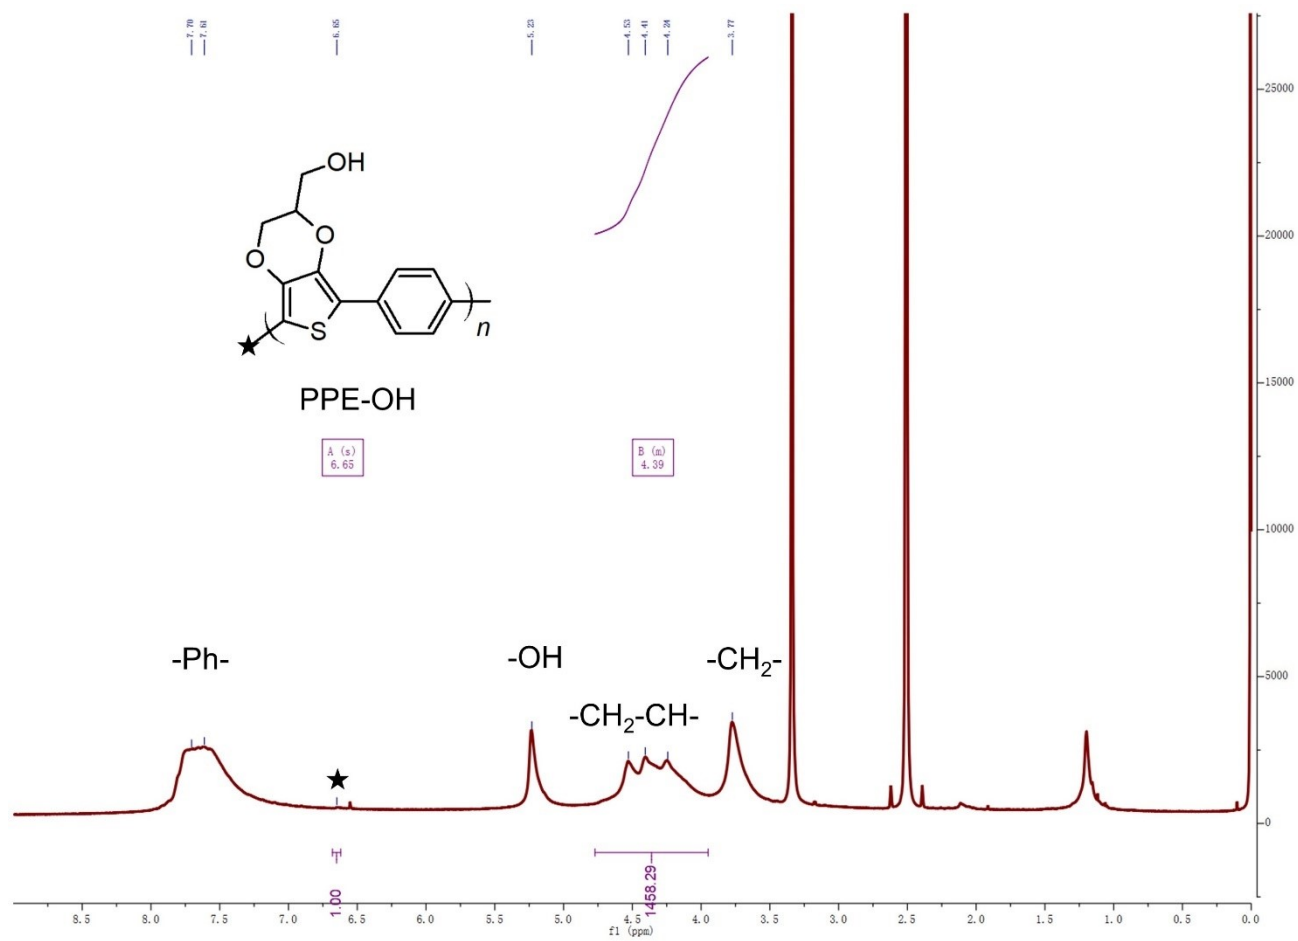

$^1\text{H}$  NMR of PPE-OH with entry 14 of Table S4 [600MHz, dimethyl sulfoxide-d<sub>6</sub>, 323K]

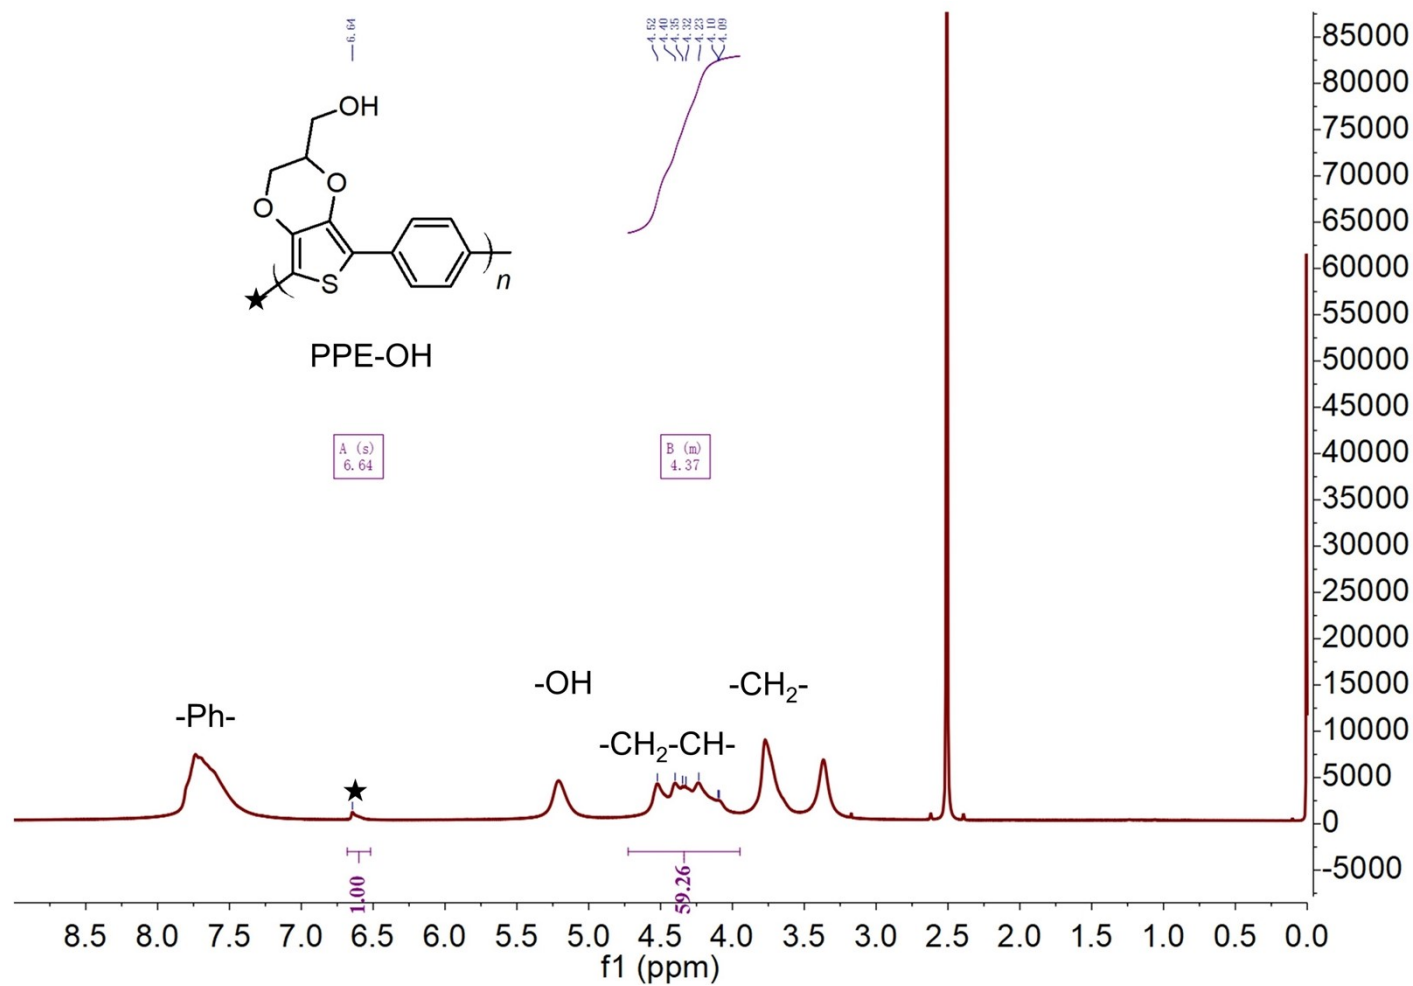

$^1\text{H}$  NMR of PPE-OH with entry 15 of Table S4 [600MHz, dimethyl sulfoxide-d<sub>6</sub>, 323K]

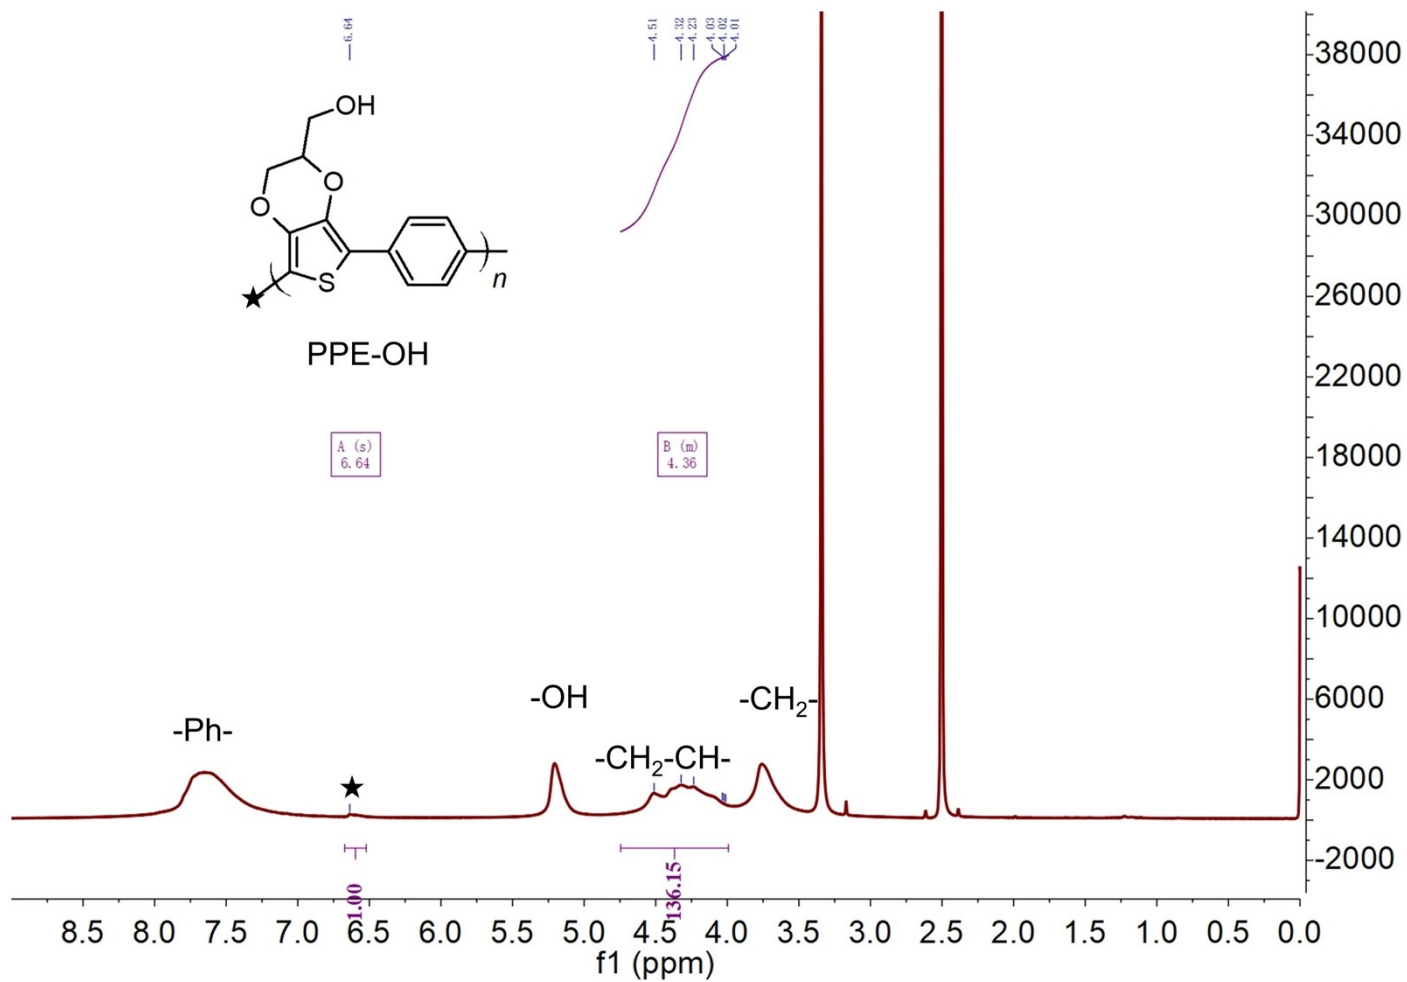

$^1\text{H}$  NMR of PPE-OH with entry 16 of Table S4 [600MHz, dimethyl sulfoxide-d<sub>6</sub>, 323K]

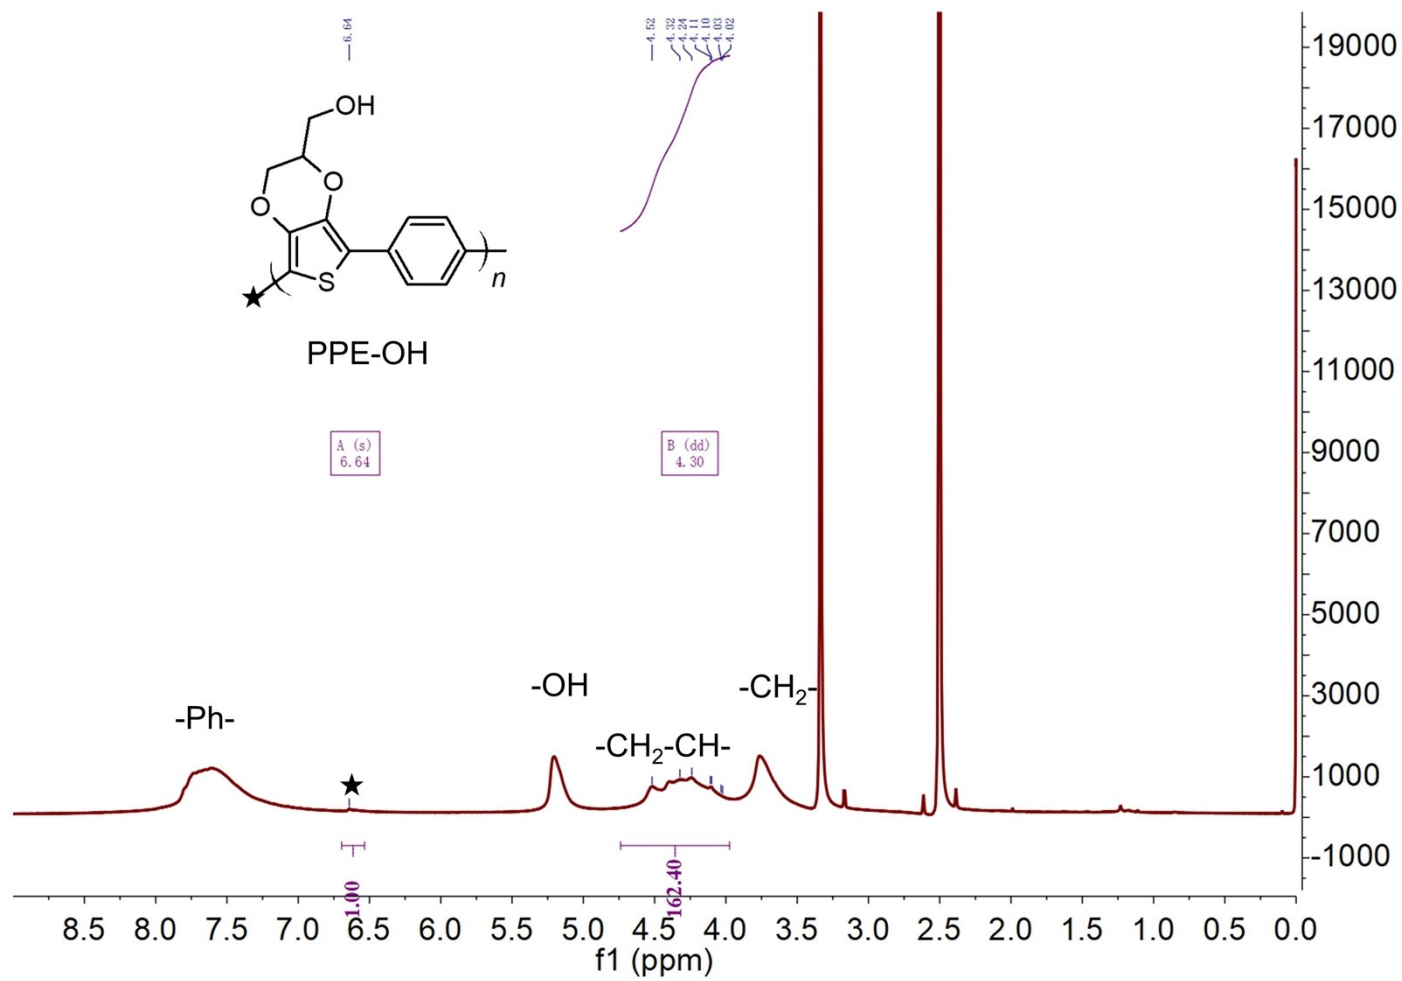

$^1\text{H}$  NMR of PPE-OH with entry 17 of Table S4 [600MHz, dimethyl sulfoxide-d<sub>6</sub>, 323K]

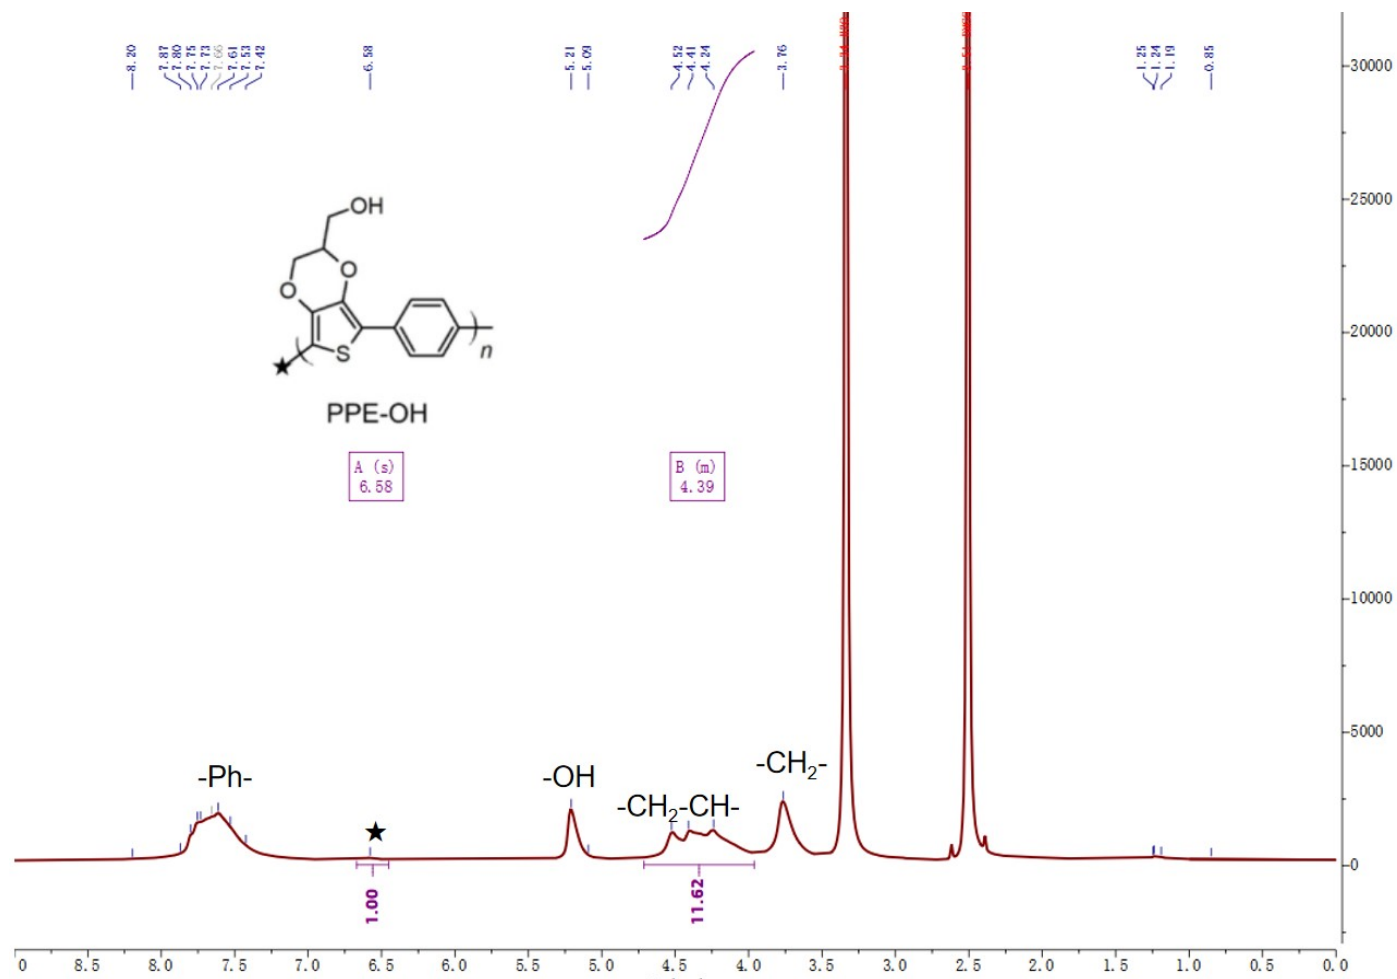

$^1\text{H}$  NMR of PPE-OH with entry 19 of Table S4 [600MHz, dimethyl sulfoxide-d<sub>6</sub>, 323K]

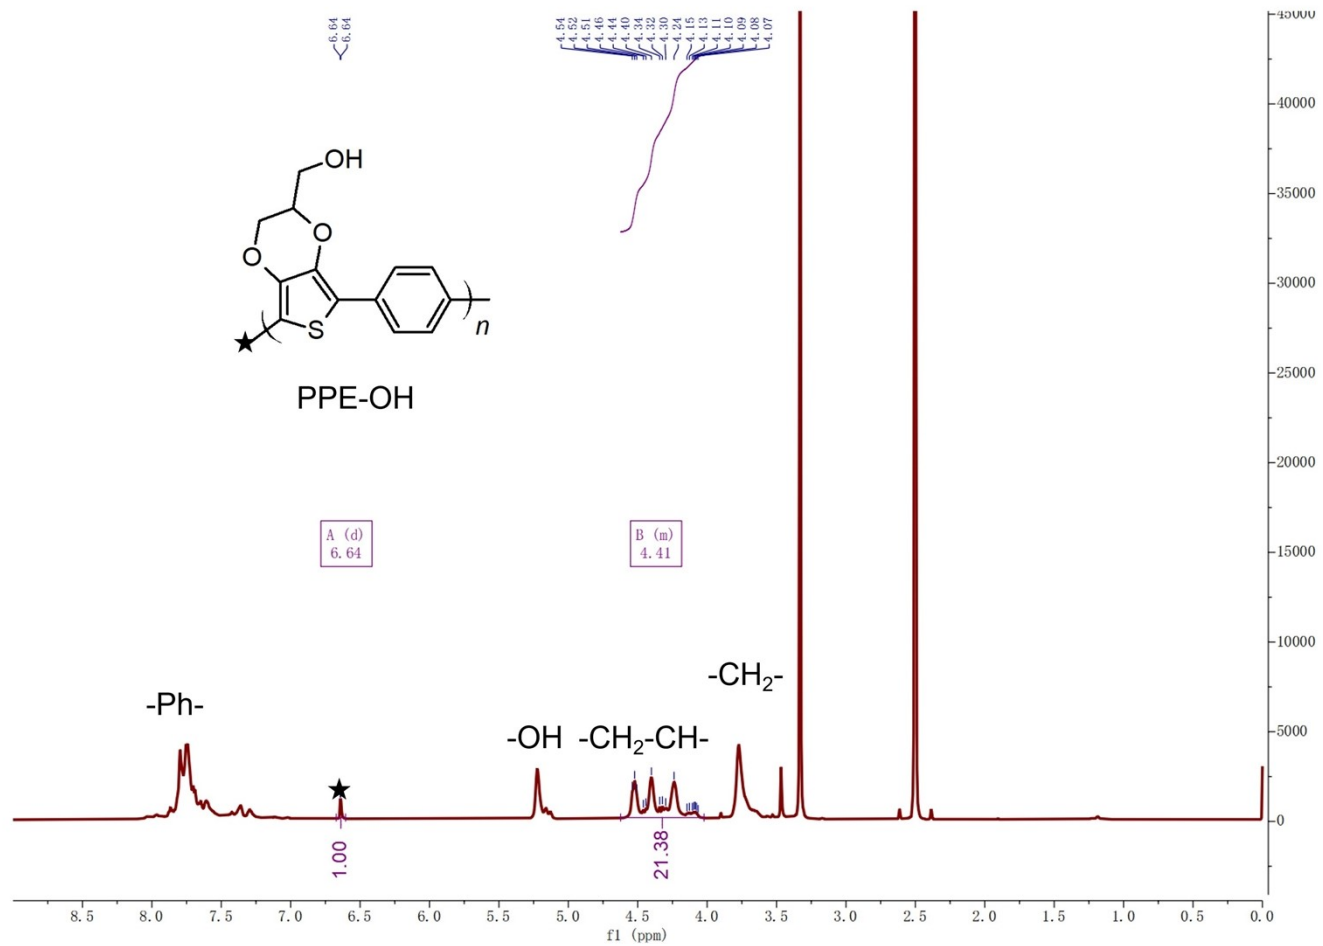

$^1\text{H}$  NMR of PPE-OH with entry 20 of Table S4 [600MHz, dimethyl sulfoxide-d<sub>6</sub>, 323K]

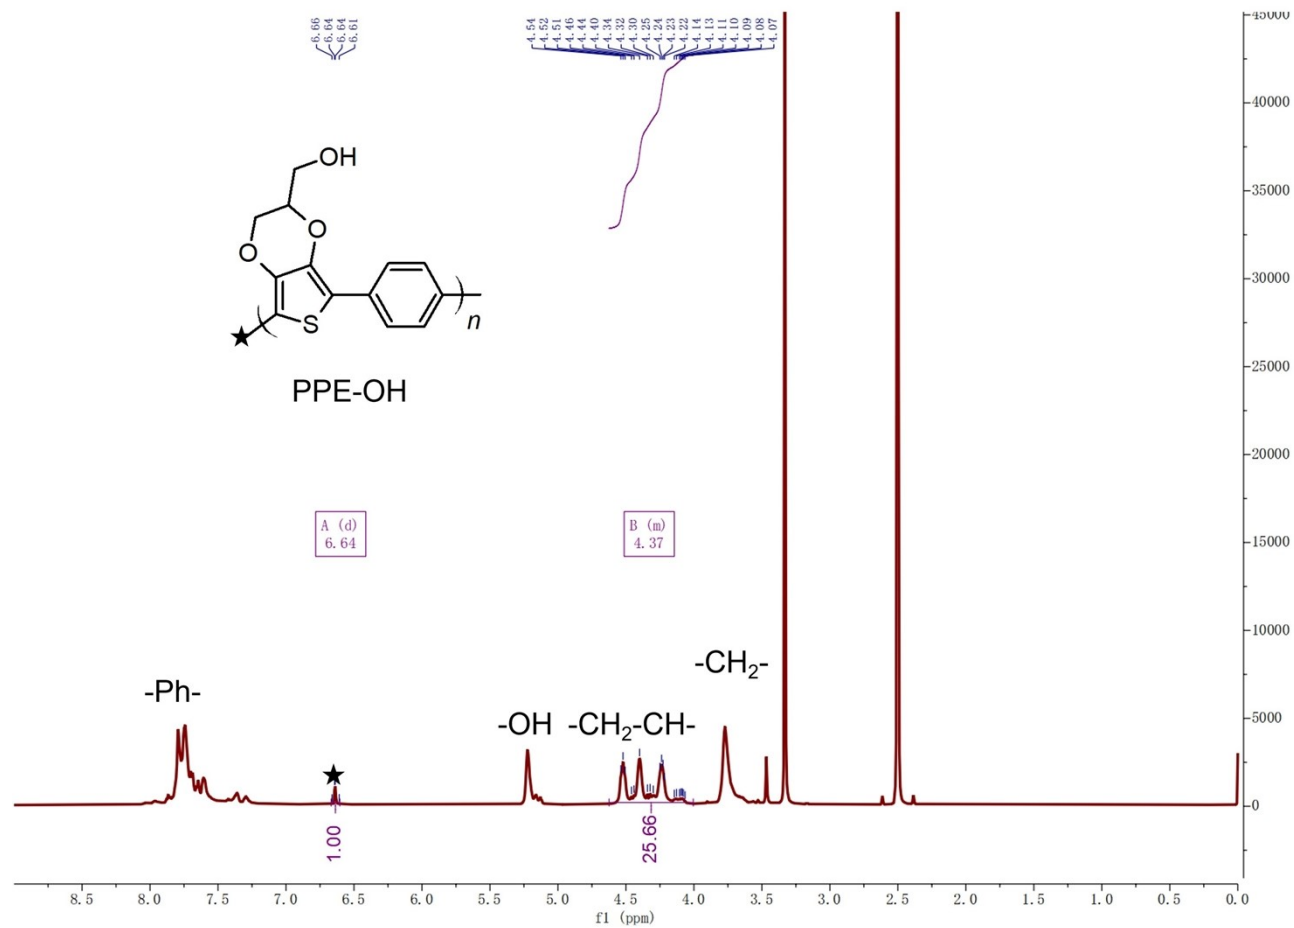

$^1\text{H}$  NMR of PPE-OH with entry 21 of Table S4 [600MHz, dimethyl sulfoxide-d<sub>6</sub>, 323K]

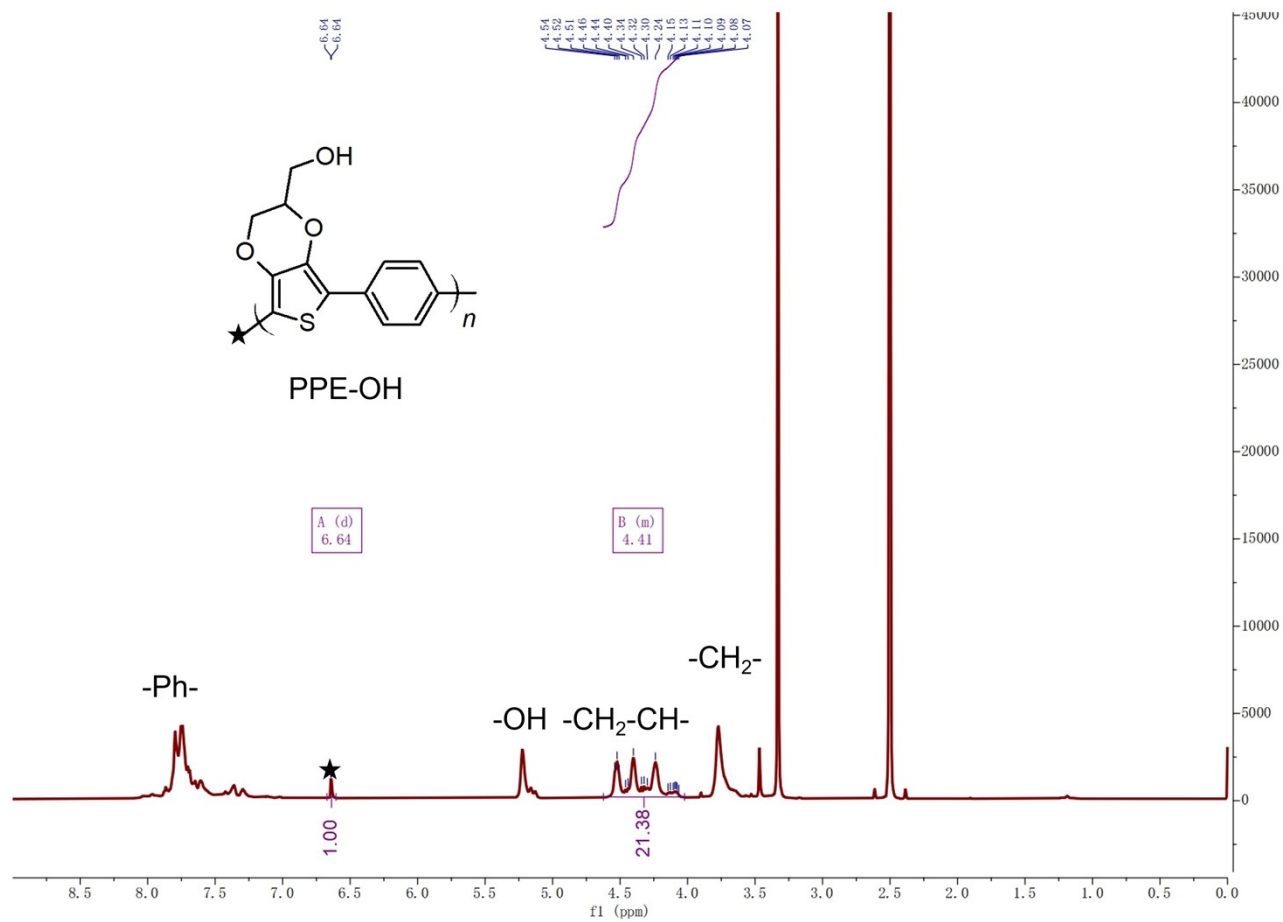

<sup>1</sup>H NMR of PEE-COOH with entry 4 of Table S5 [600MHz, dimethyl sulfoxide-d6/deuterium oxide/hydrazine hydrate-d6 (v/v 100:5:1), 323K]

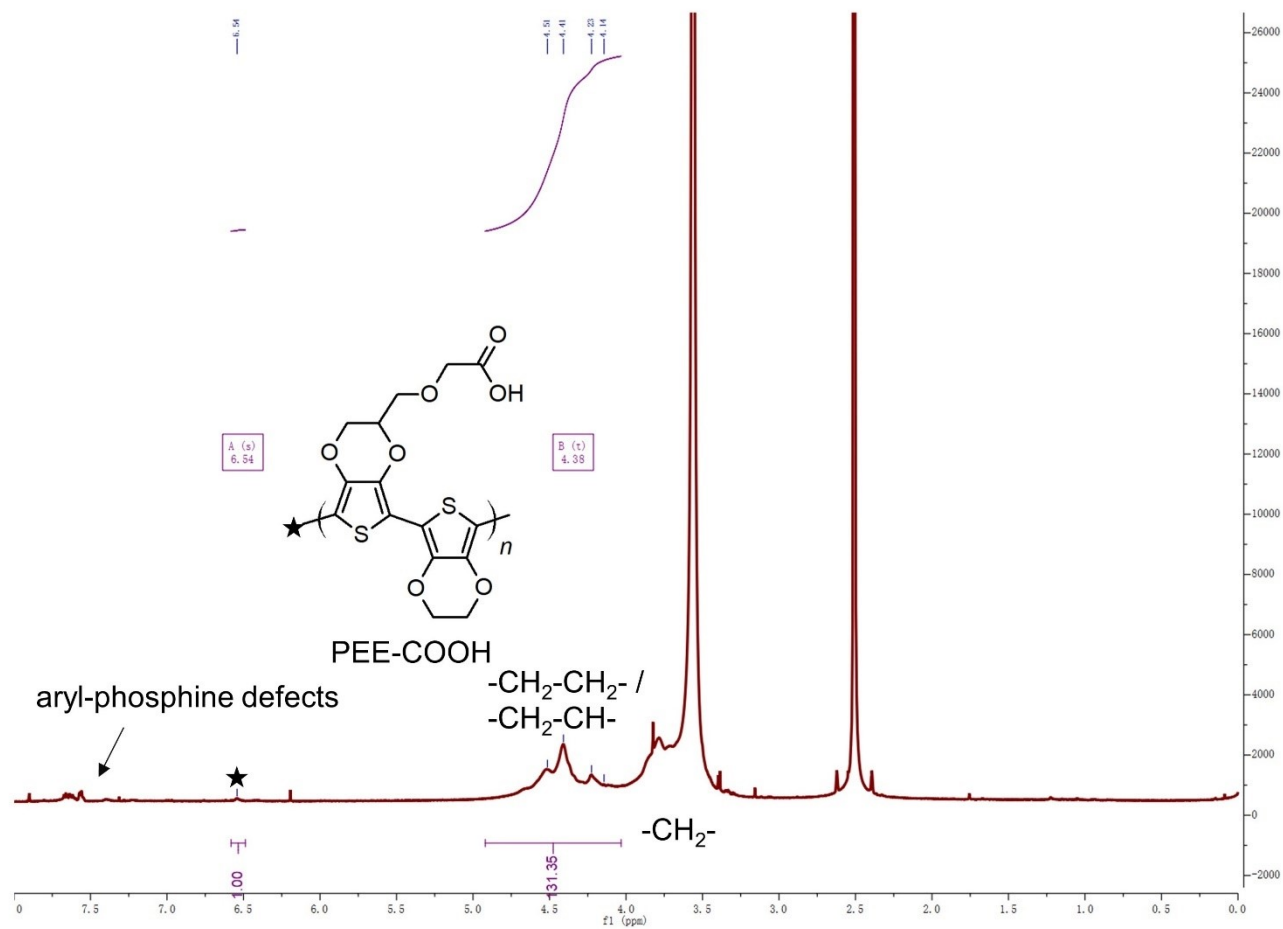

<sup>1</sup>H NMR of PEE-COOH with entry 8 of Table S5 [600MHz, dimethyl sulfoxide-d6/deuterium oxide/hydrazine hydrate-d6 (v/v 100:5:1), 323K]

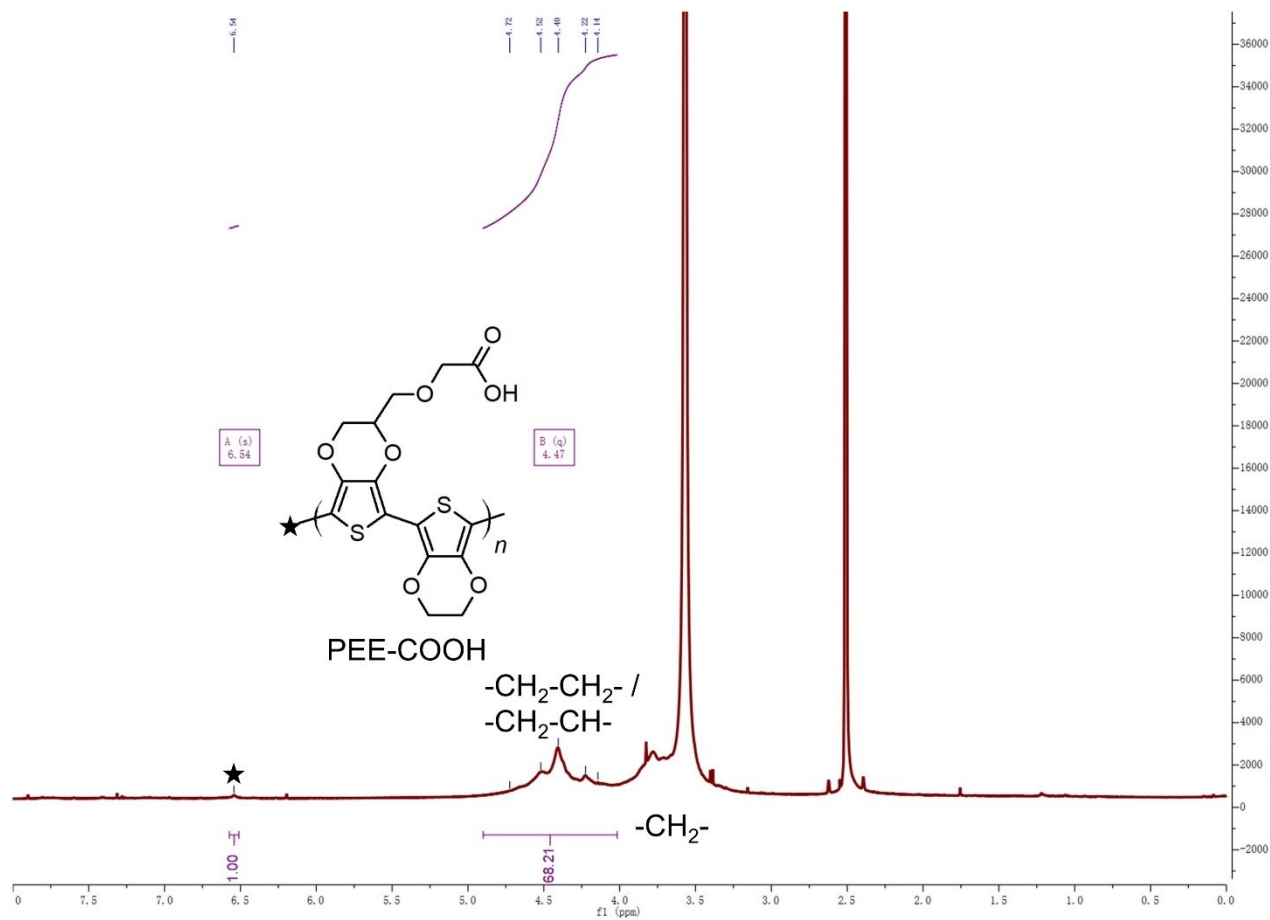

$^1\text{H}$  NMR of PEE-COOH with entry 9 of Table S5 [600MHz, dimethyl sulfoxide-d<sub>6</sub>/deuterium oxide/hydrazine hydrate-d<sub>6</sub> (v/v 100:5:1), 323K]

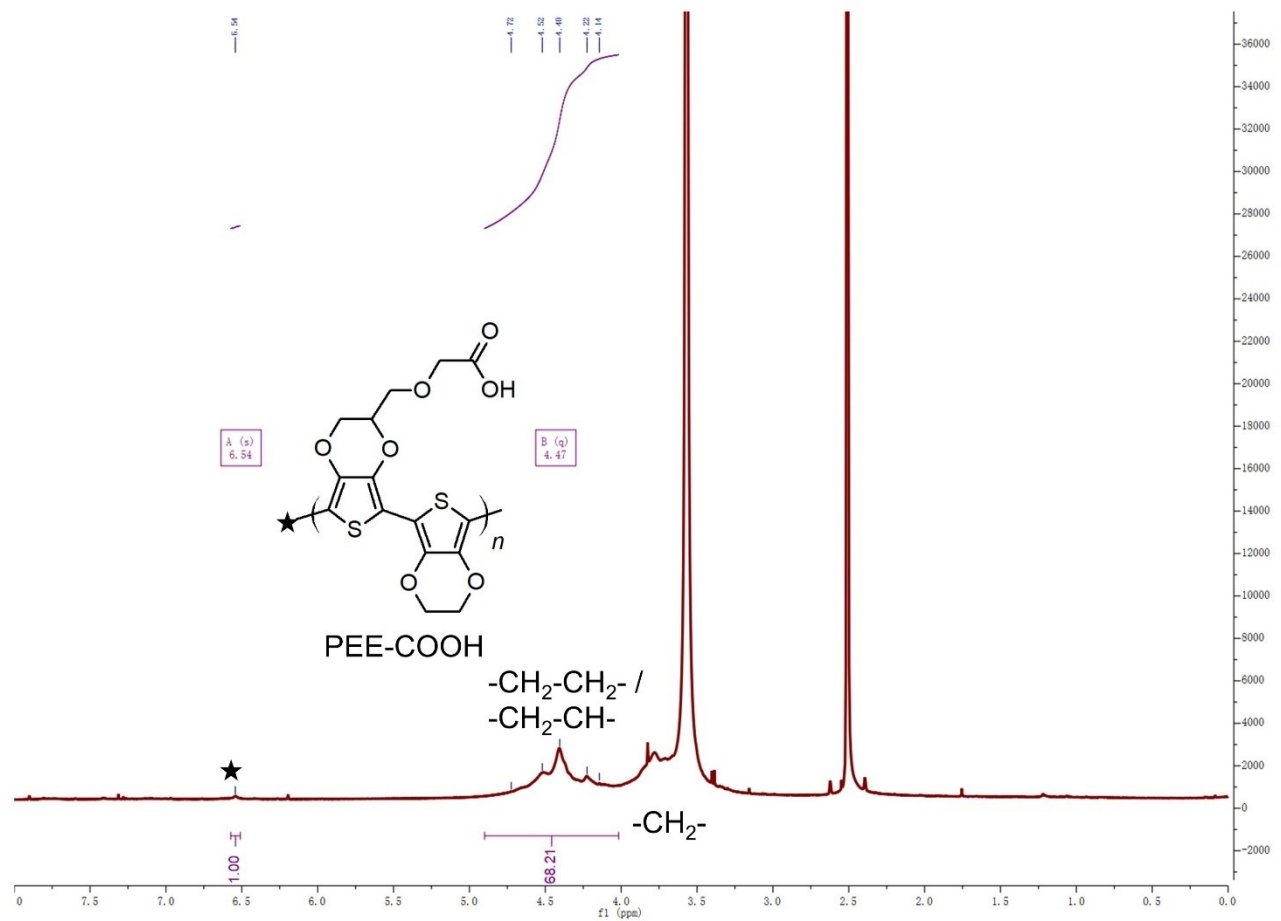

$^1\text{H}$  NMR of PEE-COOH with entry 10 of Table S5 [600MHz, dimethyl sulfoxide-d<sub>6</sub>/deuterium oxide/hydrazine hydrate-d<sub>6</sub> (v/v 100:5:1), 323K]

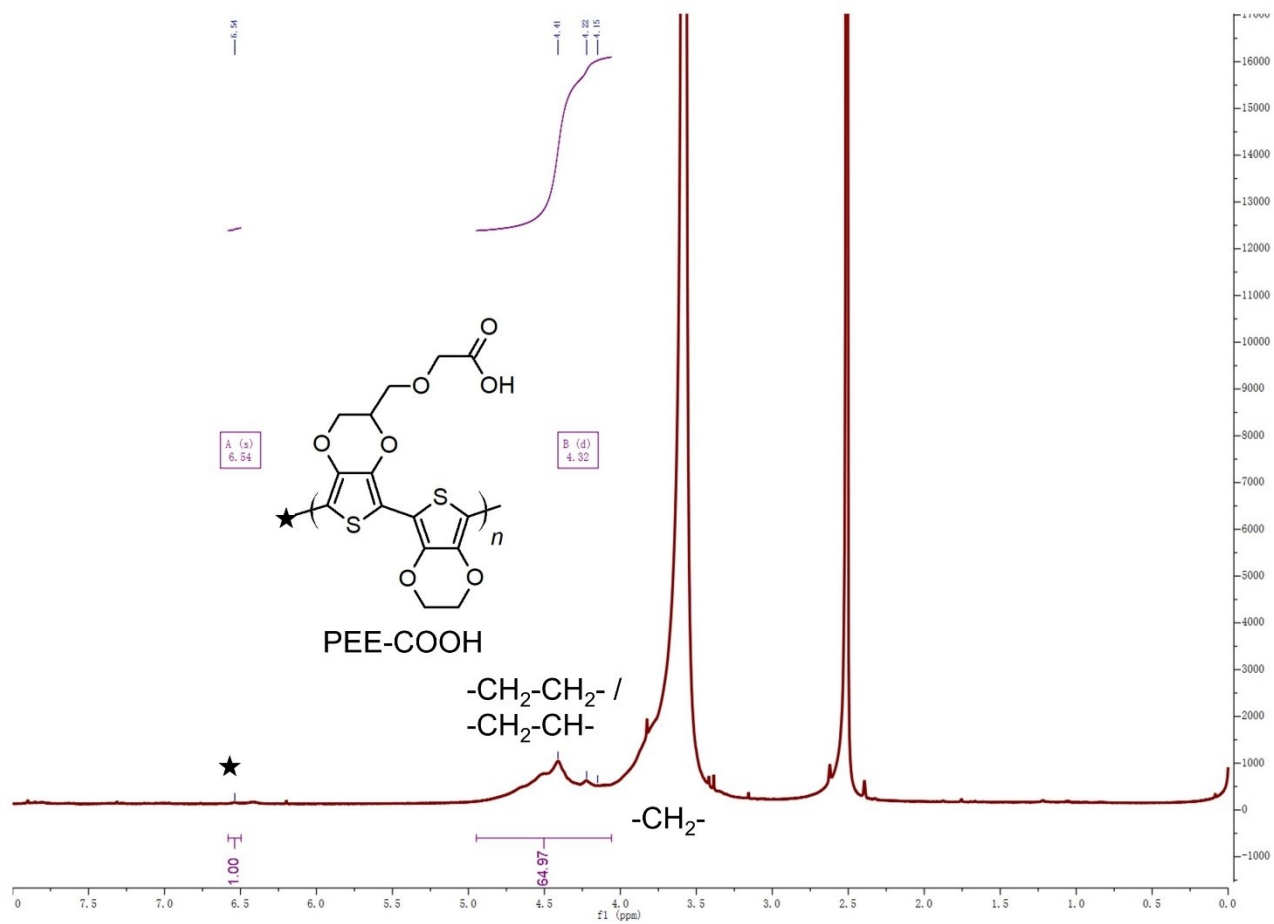

$^1\text{H}$  NMR of PPE-COOH with entry 4 of Table S5 [600MHz, dimethyl sulfoxide-d<sub>6</sub>/deuterium oxide/hydrazine hydrate-d<sub>6</sub> (v/v 100:5:1), 323K]

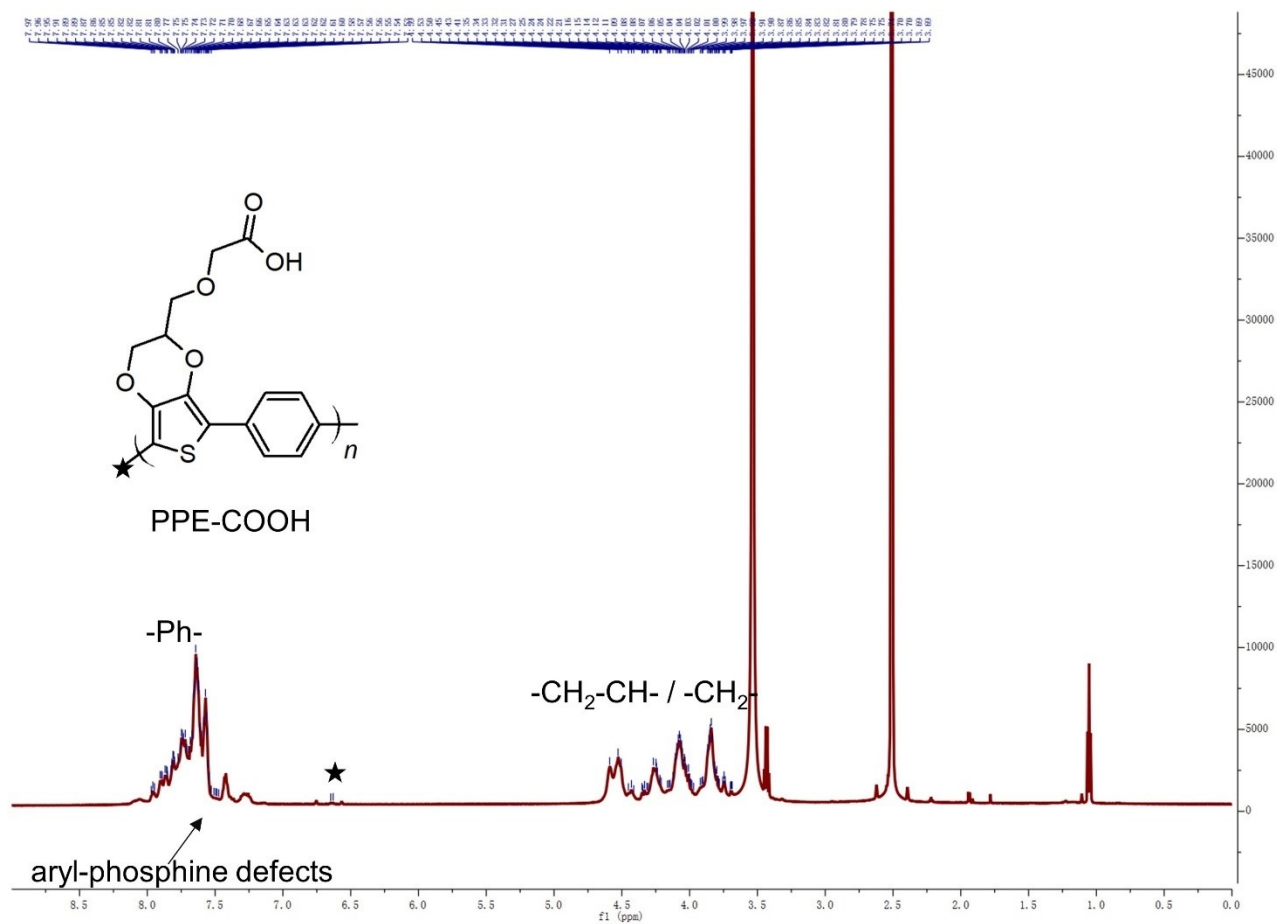

$^1\text{H}$  NMR of PPE-COOH with entry 8 of Table S6 [600MHz, dimethyl sulfoxide-d<sub>6</sub>/deuterium oxide/hydrazine hydrate-d<sub>6</sub> (v/v 100:5:1), 323K]

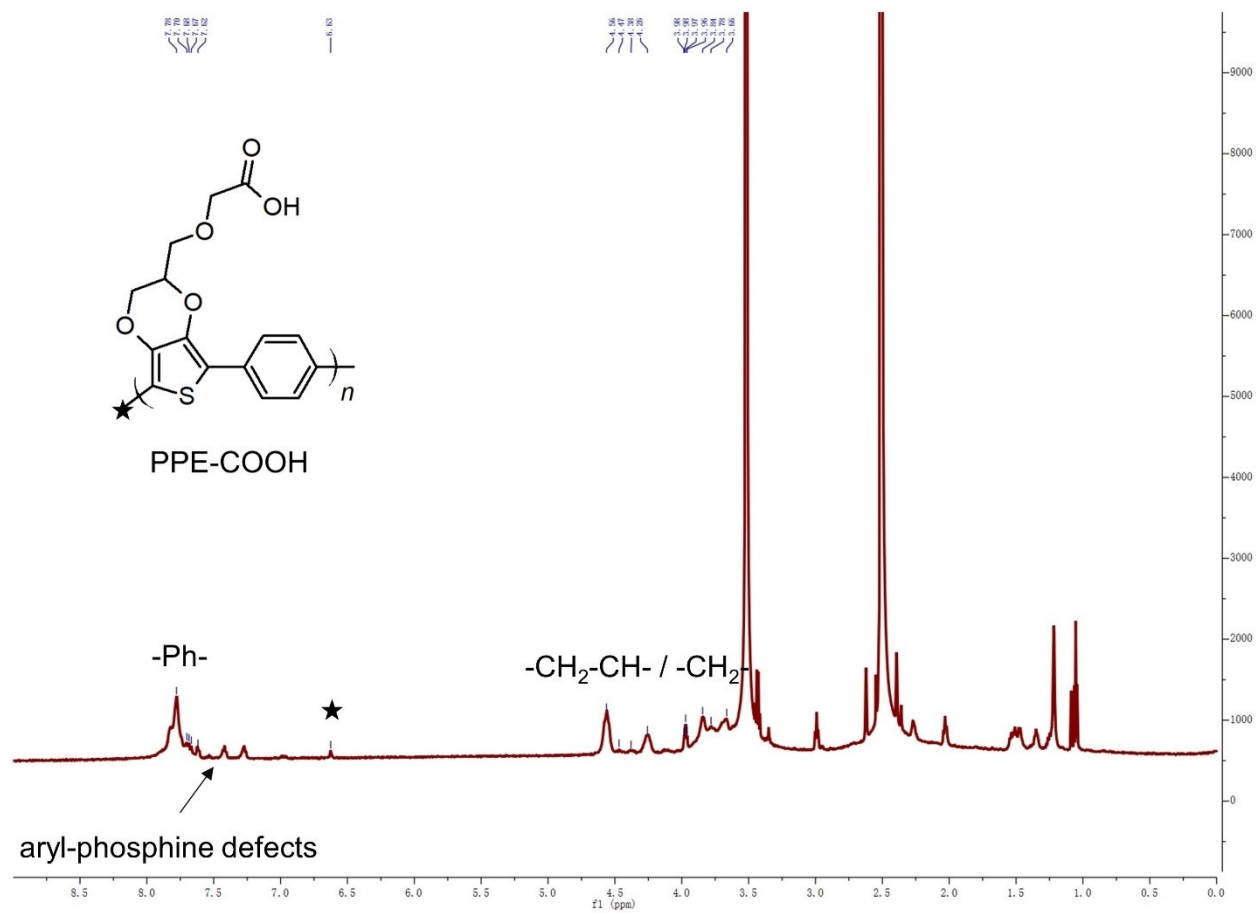

$^1\text{H}$  NMR of PPE-COOH with entry 9 of Table S6 [600MHz, dimethyl sulfoxide-d<sub>6</sub>/deuterium oxide/hydrazine hydrate-d<sub>6</sub> (v/v 100:5:1), 323K]

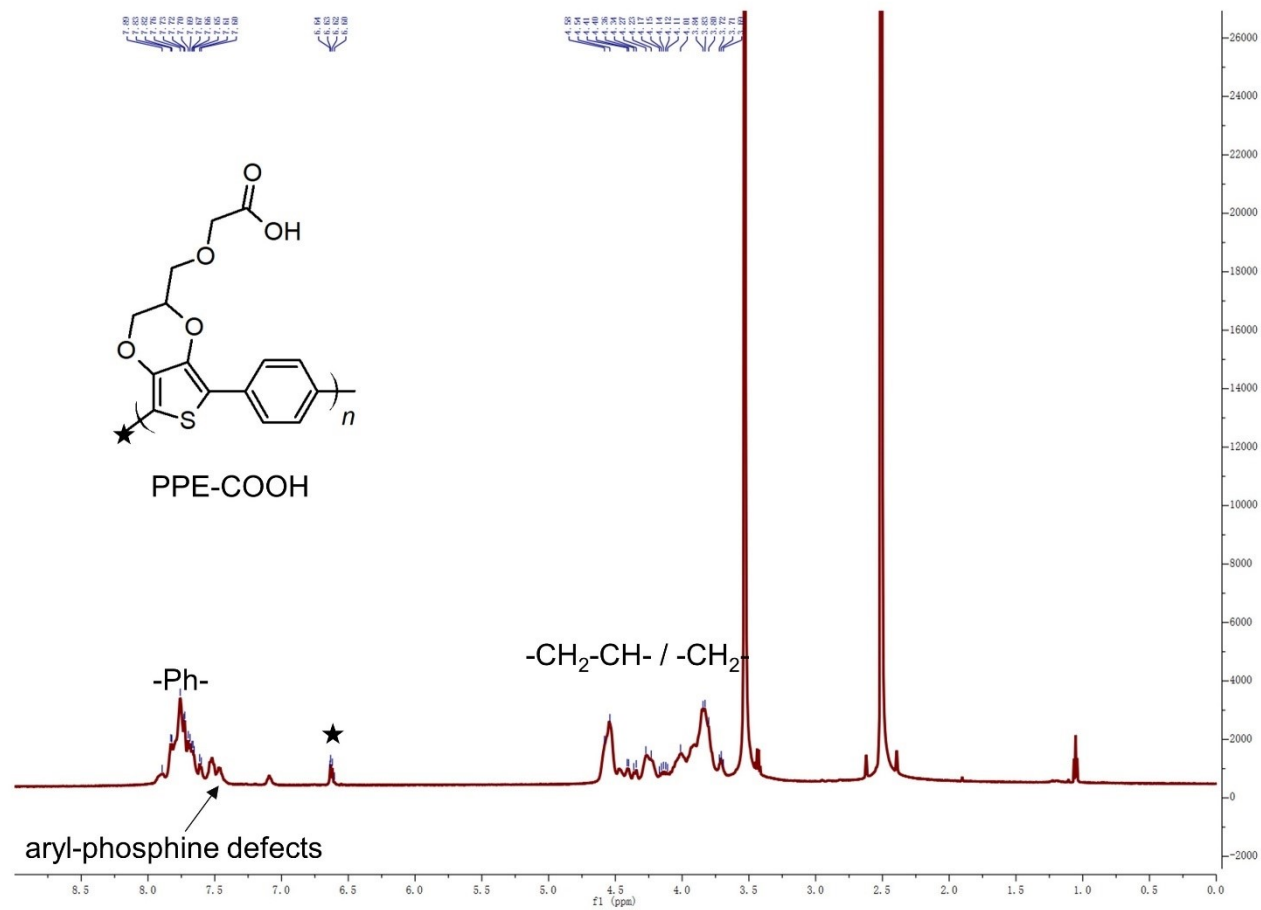

$^1\text{H}$  NMR of PPE-COOH with entry 10 of Table S6 [600MHz, dimethyl sulfoxide- $d_6$ /deuterium oxide/hydrazine hydrate- $d_6$  (v/v 100:5:1), 323K]

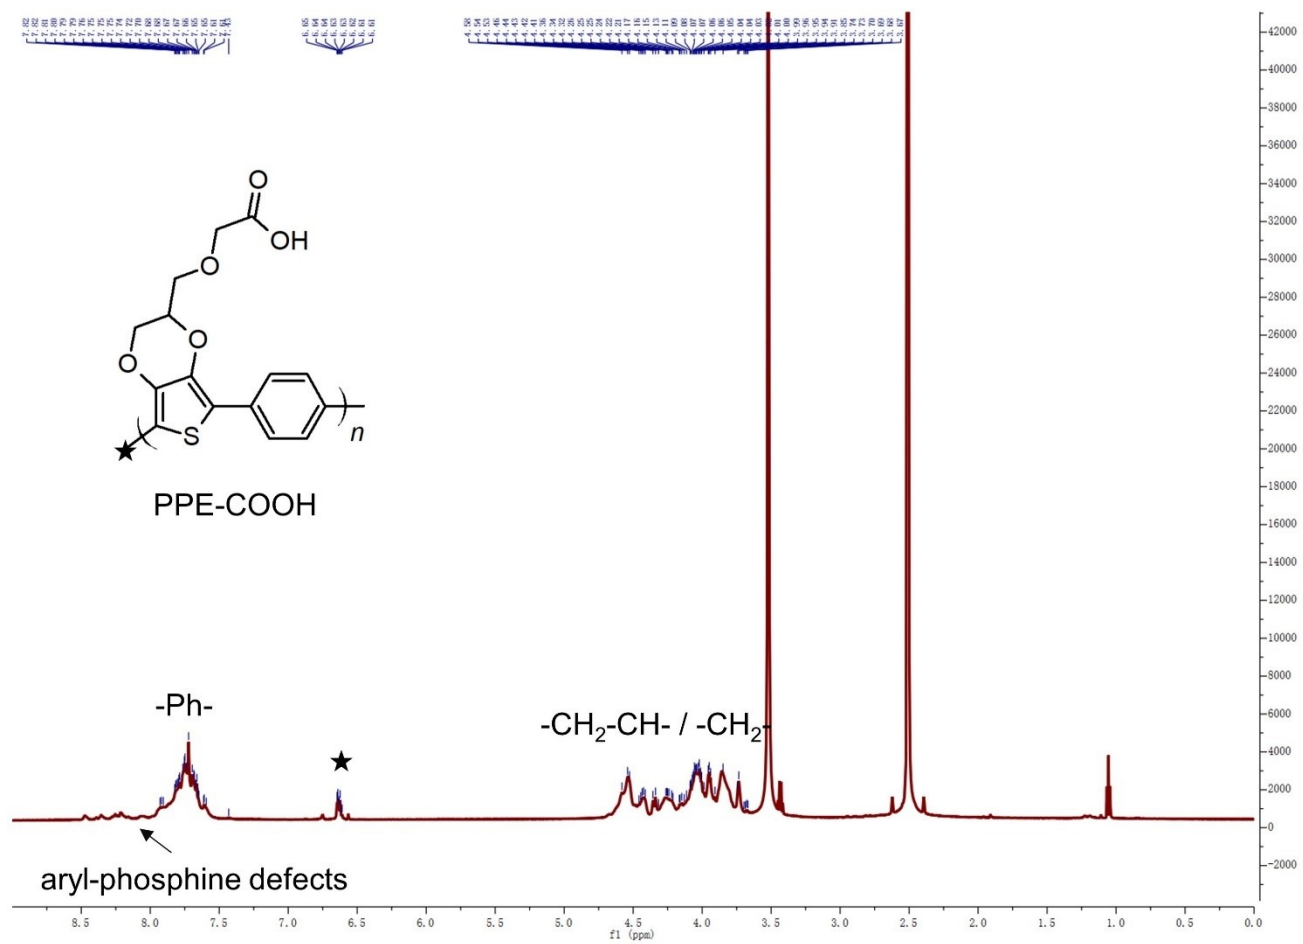

$^1\text{H}$  NMR of PEE-NH<sub>2</sub> with entry 4 of Table S7 [600MHz, dimethyl sulfoxide-d<sub>6</sub>/hydrazine hydrate-d<sub>6</sub> (v/v 100:1), 323K]

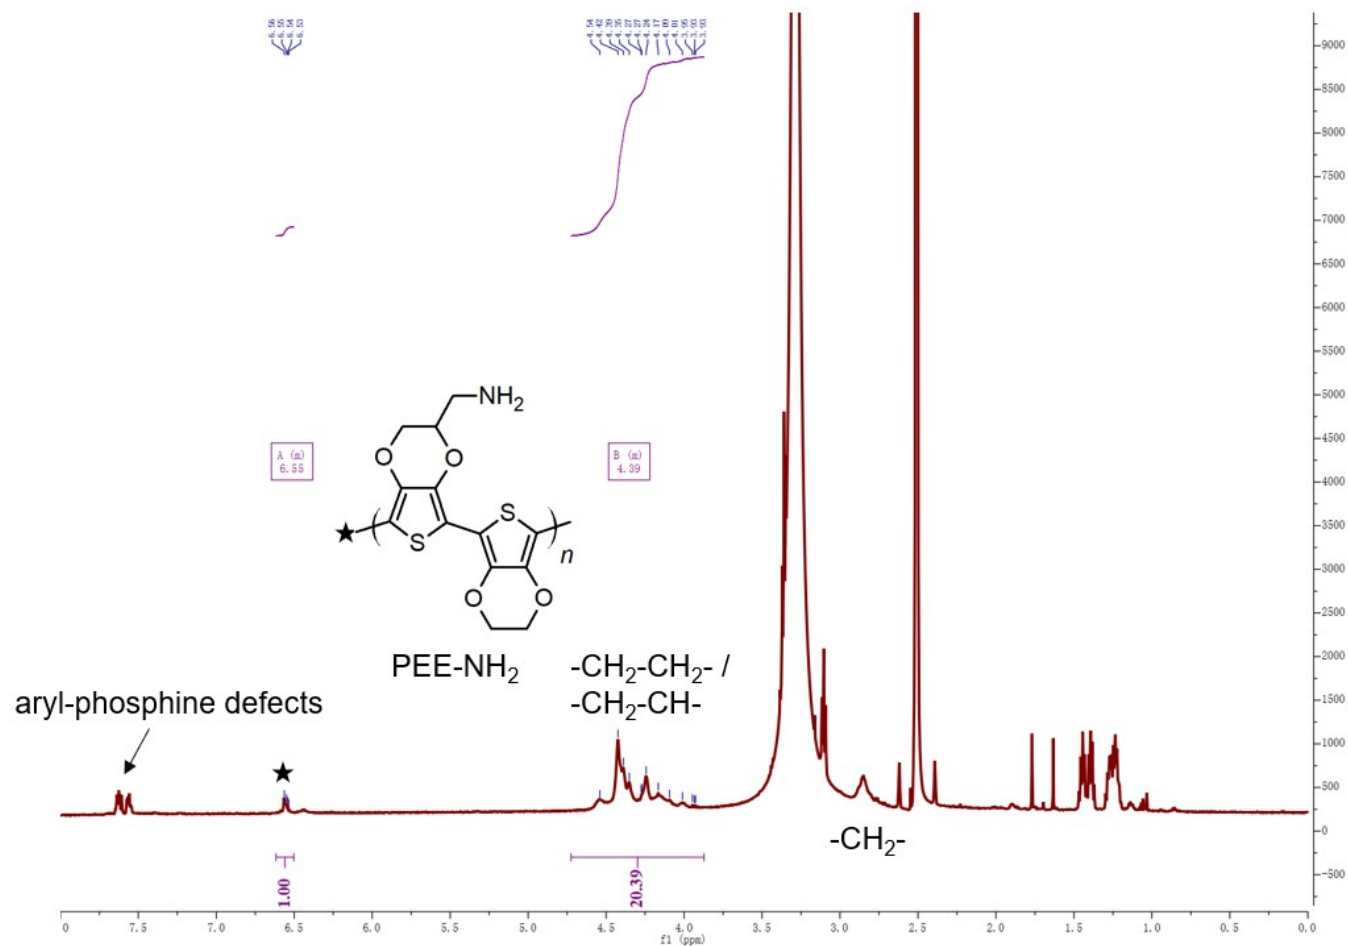

$^1\text{H}$  NMR of PEE-NH<sub>2</sub> with entry 5 of Table S7 [600MHz, dimethyl sulfoxide-d<sub>6</sub>/hydrazine hydrate-d<sub>6</sub> (v/v 100:1), 323K]

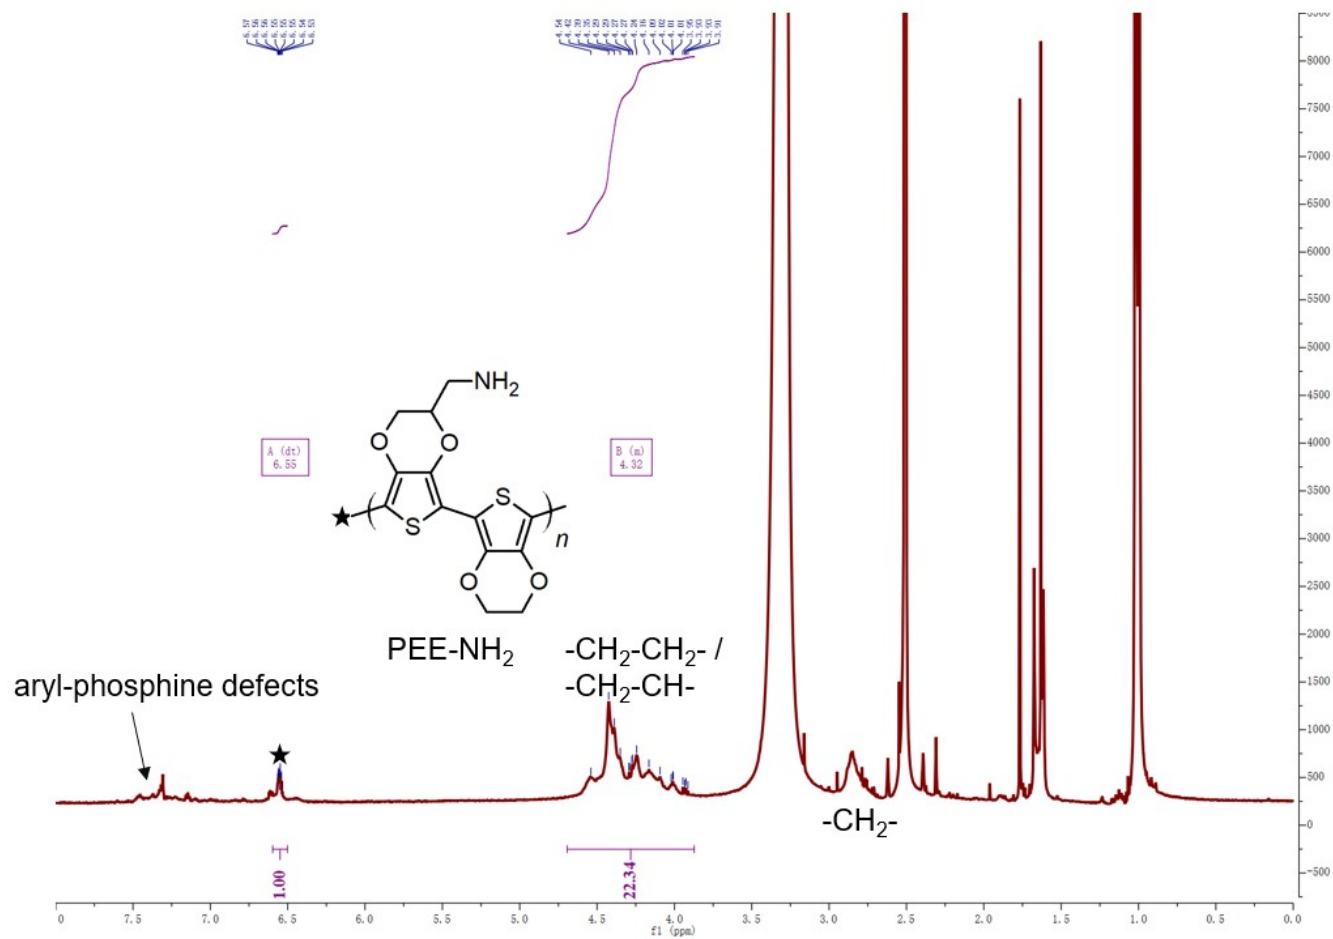

$^1\text{H}$  NMR of PEE-NH<sub>2</sub> with entry 6 of Table S7 [600MHz, dimethyl sulfoxide-d<sub>6</sub>/hydrazine hydrate-d<sub>6</sub> (v/v 100:1), 323K]

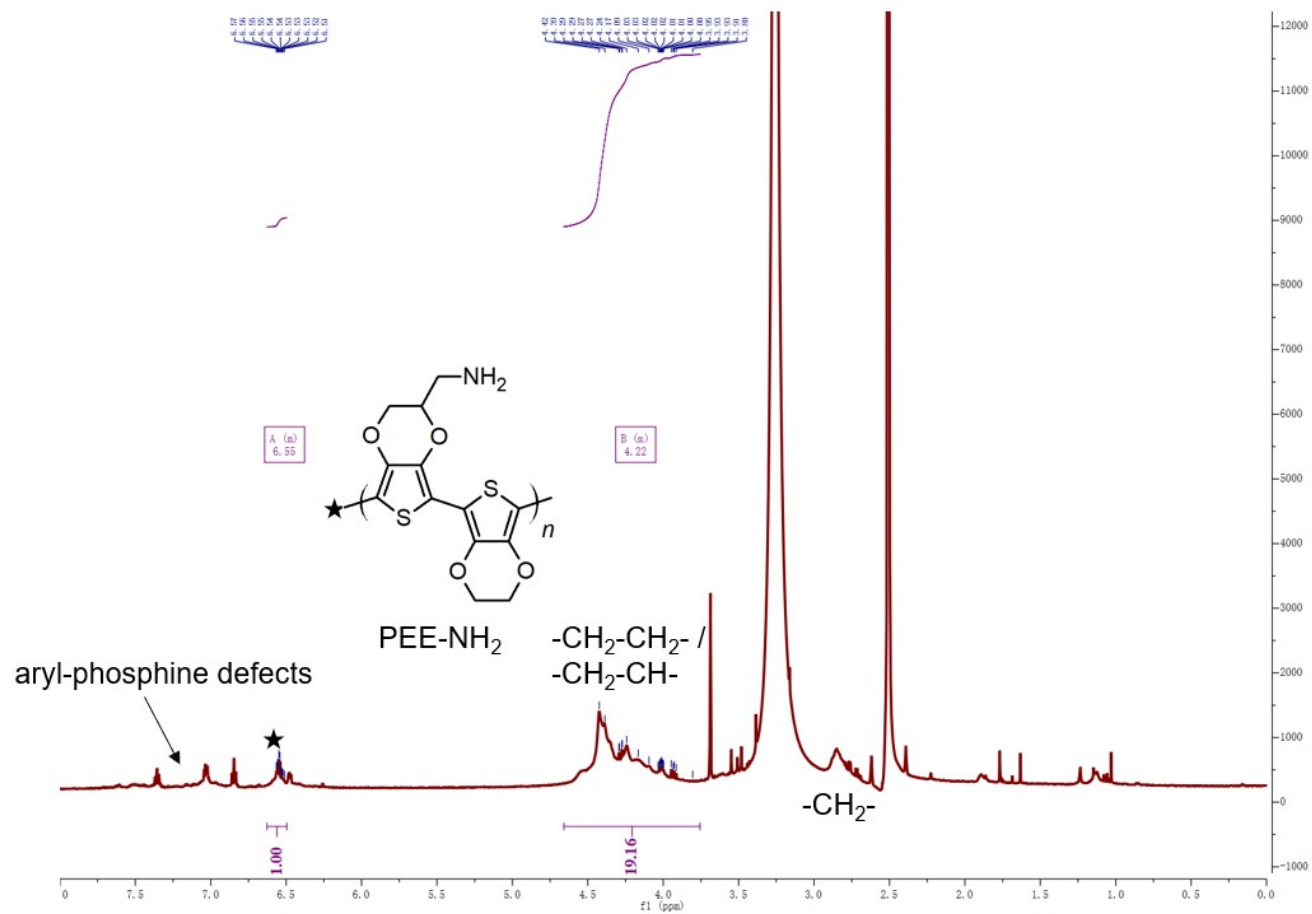

$^1\text{H}$  NMR of PEE-NH<sub>2</sub> with entry 8 of Table S7 [600MHz, dimethyl sulfoxide-d<sub>6</sub>/hydrazine hydrate-d<sub>6</sub> (v/v 100:1), 323K]

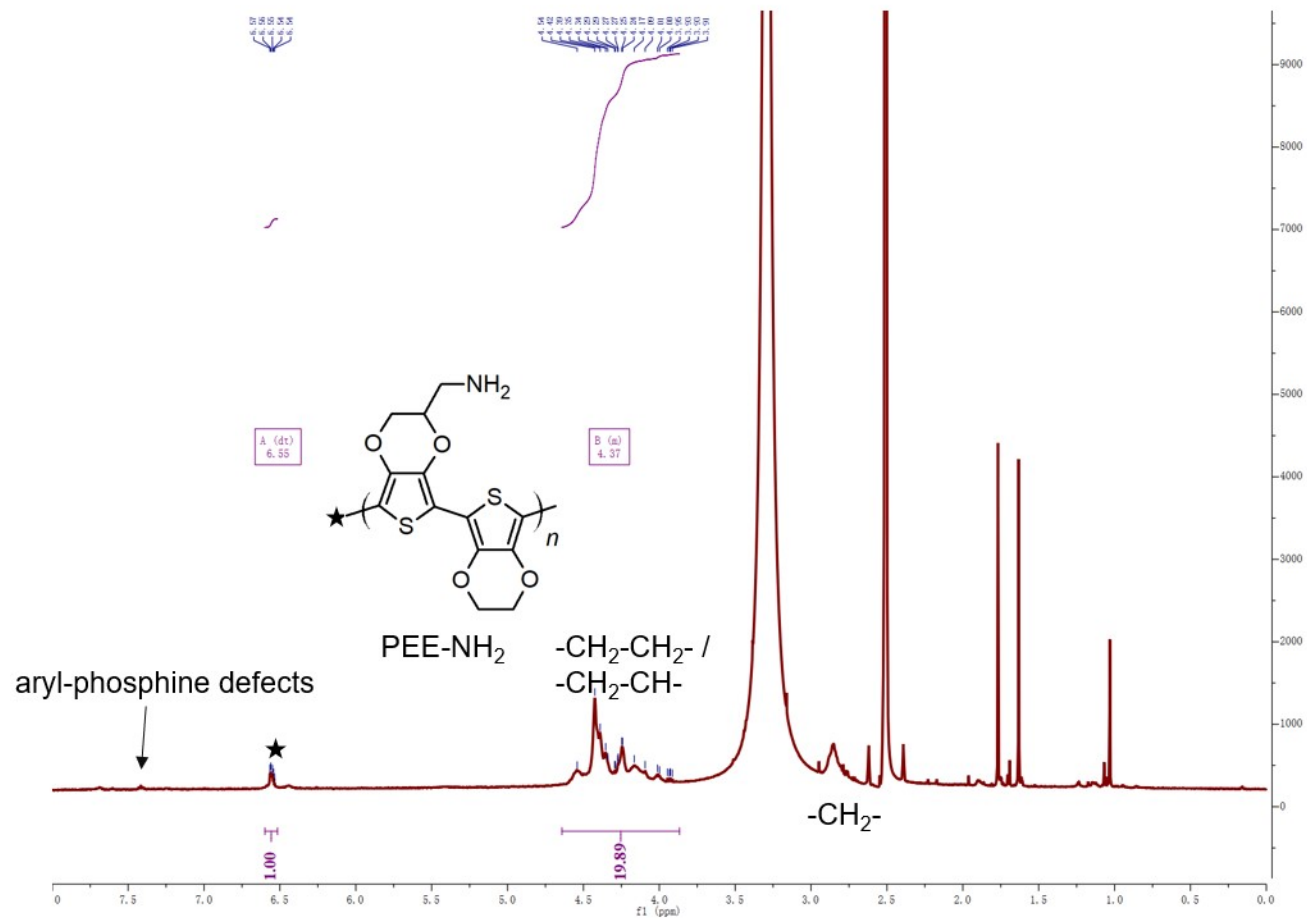



$^1\text{H}$  NMR of PEE-NH<sub>2</sub> with entry 10 of Table S7 [600MHz, dimethyl sulfoxide-d<sub>6</sub>/hydrazine hydrate-d<sub>6</sub> (v/v 100:1), 323K]

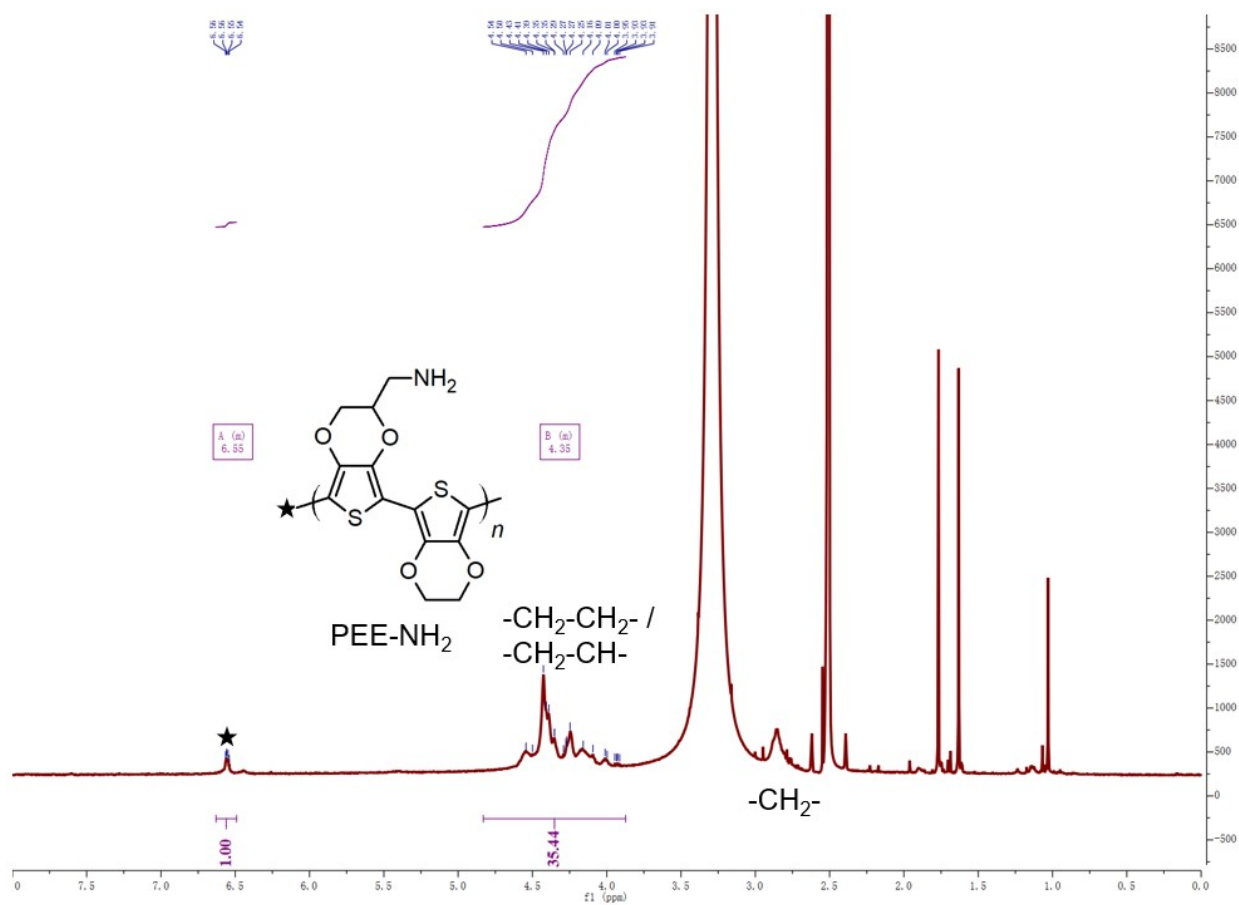

$^1\text{H}$  NMR of PEE-NH<sub>2</sub> with entry 13 of Table S7 [600MHz, dimethyl sulfoxide-d<sub>6</sub>/hydrazine hydrate-d<sub>6</sub> (v/v 100:1), 323K]

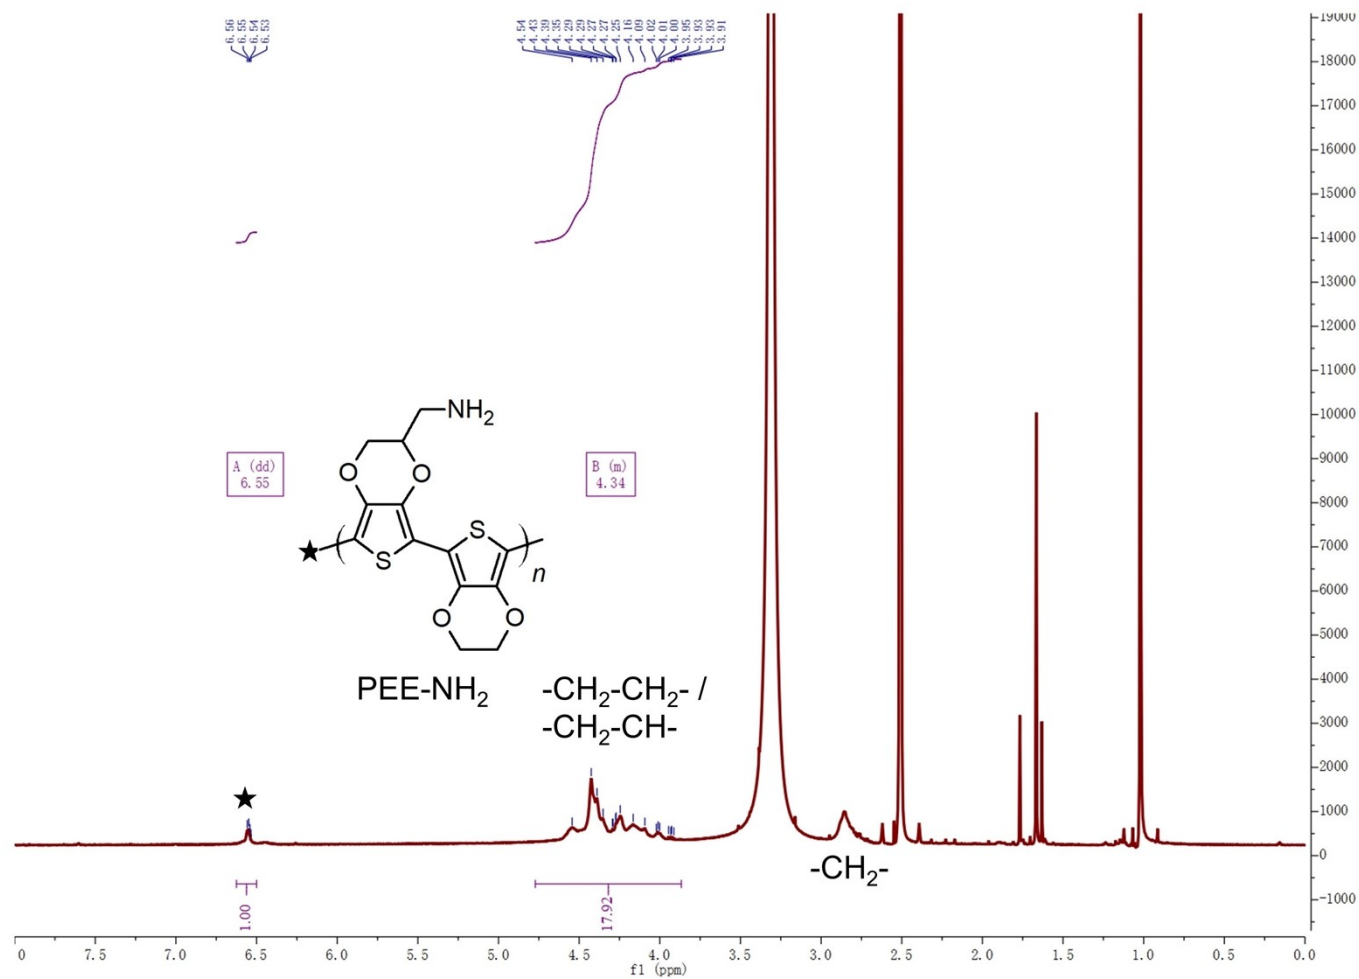

$^1\text{H}$  NMR of PPE-NH<sub>2</sub> with entry 4 of Table S8 [600MHz, dimethyl sulfoxide-d<sub>6</sub>/hydrazine hydrate-d<sub>6</sub> (v/v 100:1), 323K]

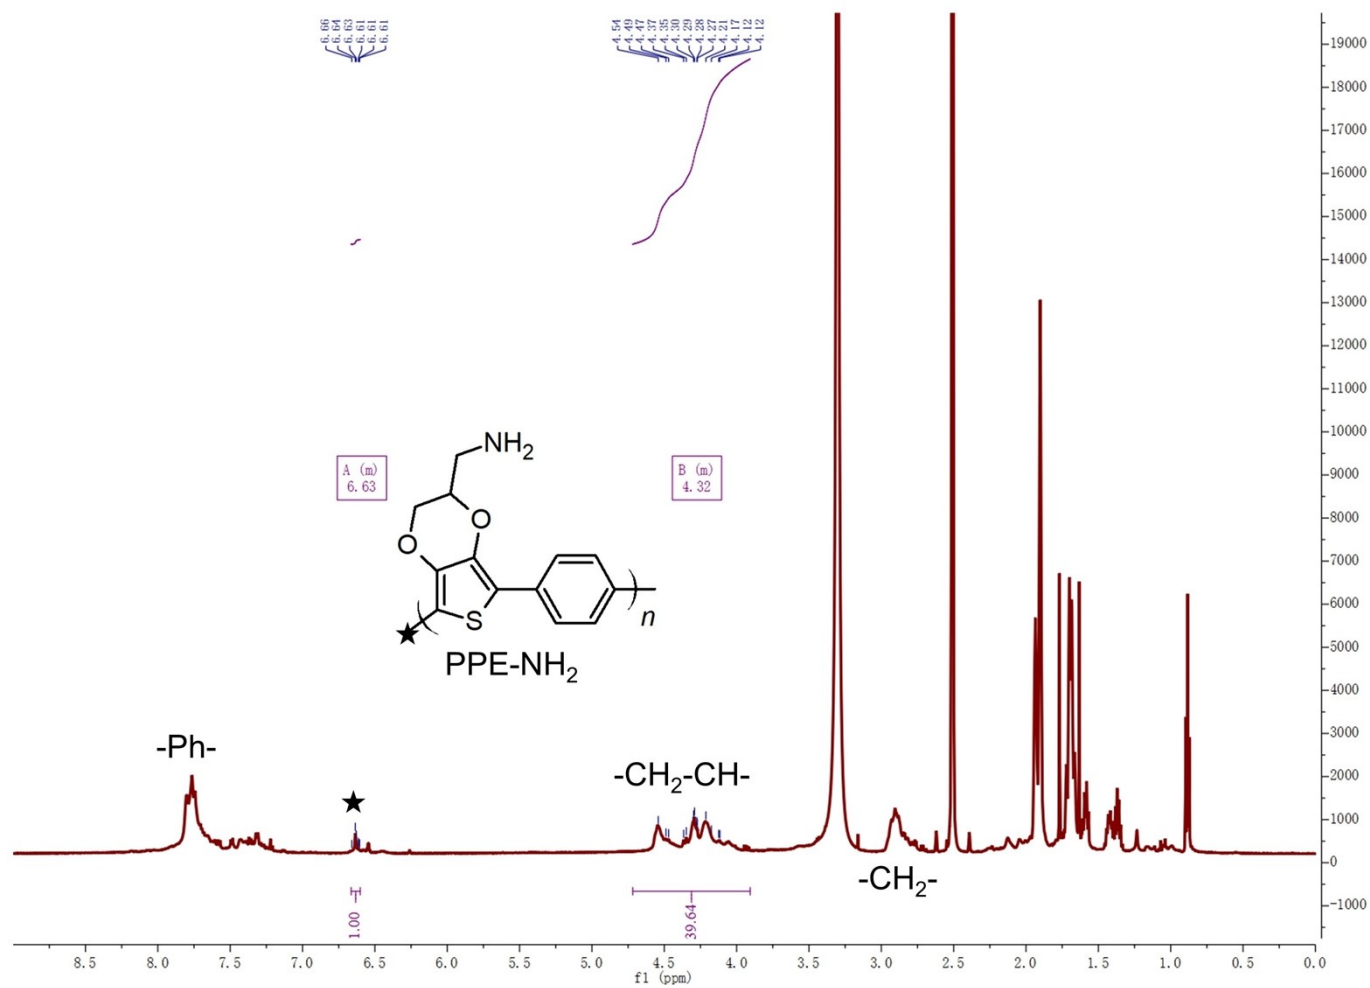

$^1\text{H}$  NMR of PPE-NH<sub>2</sub> with entry 5 of Table S8 [600MHz, dimethyl sulfoxide-d<sub>6</sub>/hydrazine hydrate-d<sub>6</sub> (v/v 100:1), 323K]

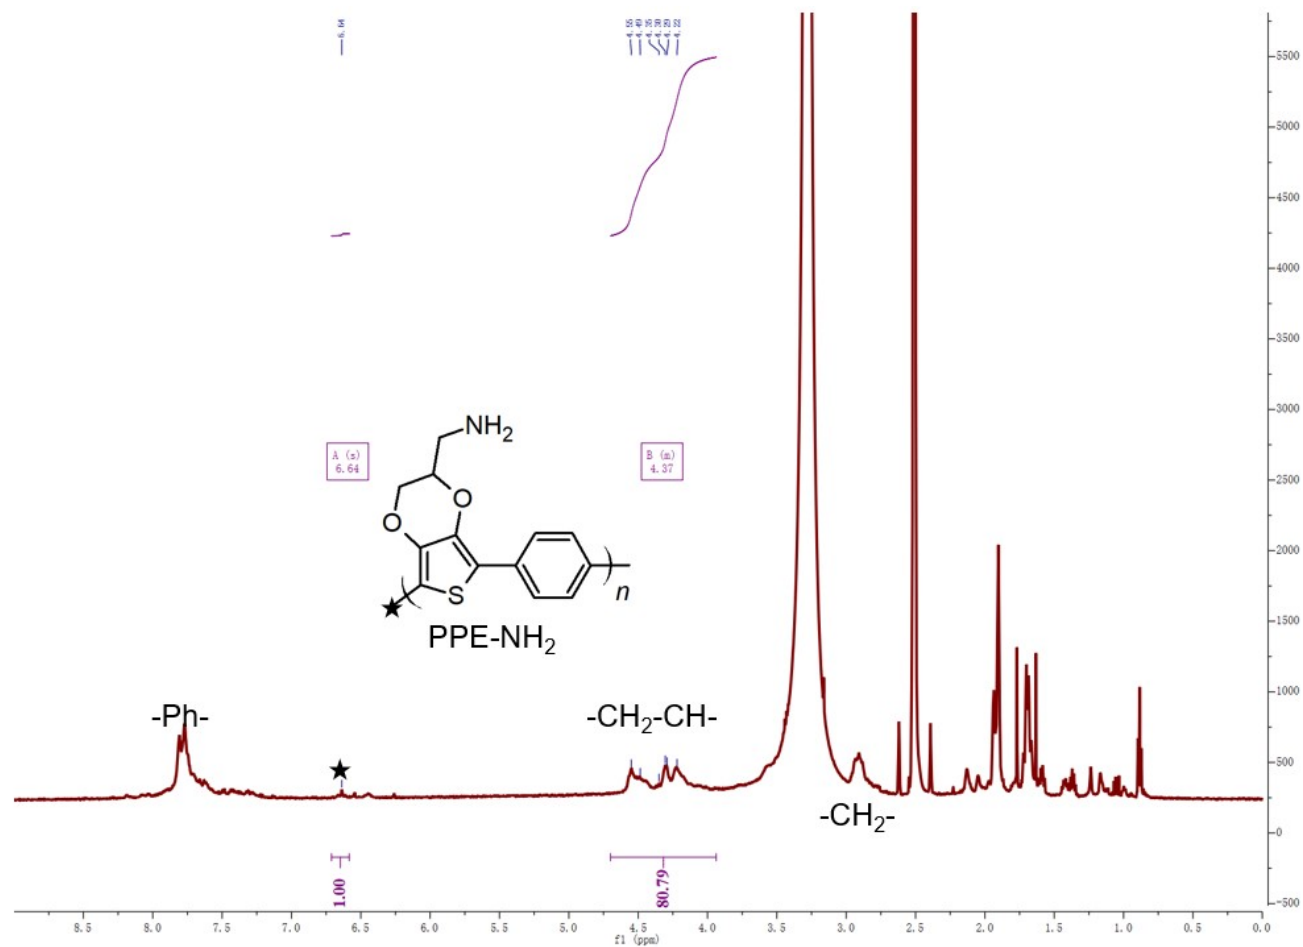

$^1\text{H}$  NMR of PPE-NH<sub>2</sub> with entry 7 of Table S8 [600MHz, dimethyl sulfoxide-d<sub>6</sub>/hydrazine hydrate-d<sub>6</sub> (v/v 100:1), 323K]

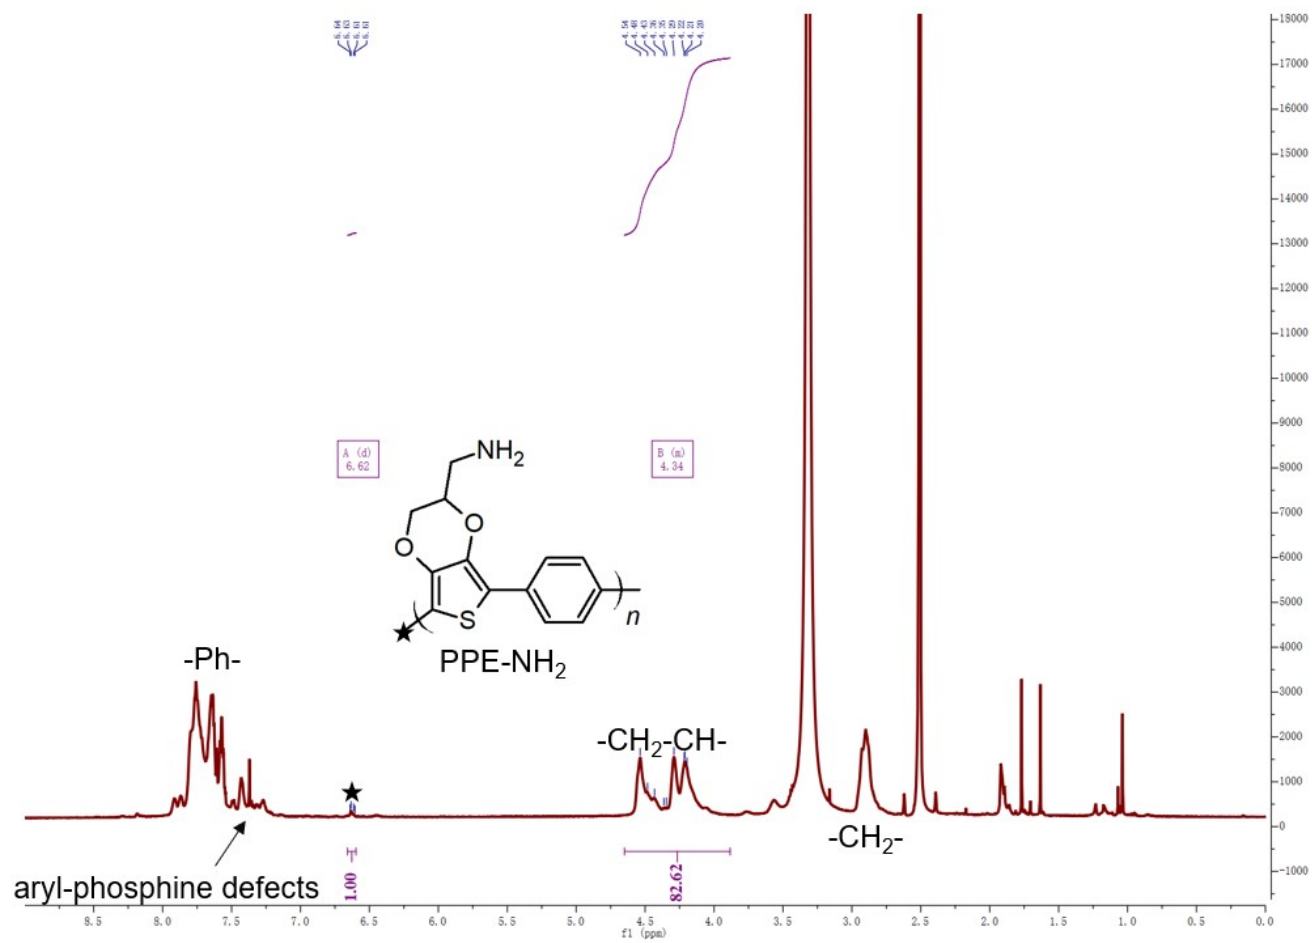

$^1\text{H}$  NMR of PPE-NH<sub>2</sub> with entry 8 of Table S8 [600MHz, dimethyl sulfoxide-d<sub>6</sub>/hydrazine hydrate-d<sub>6</sub> (v/v 100:1), 323K]

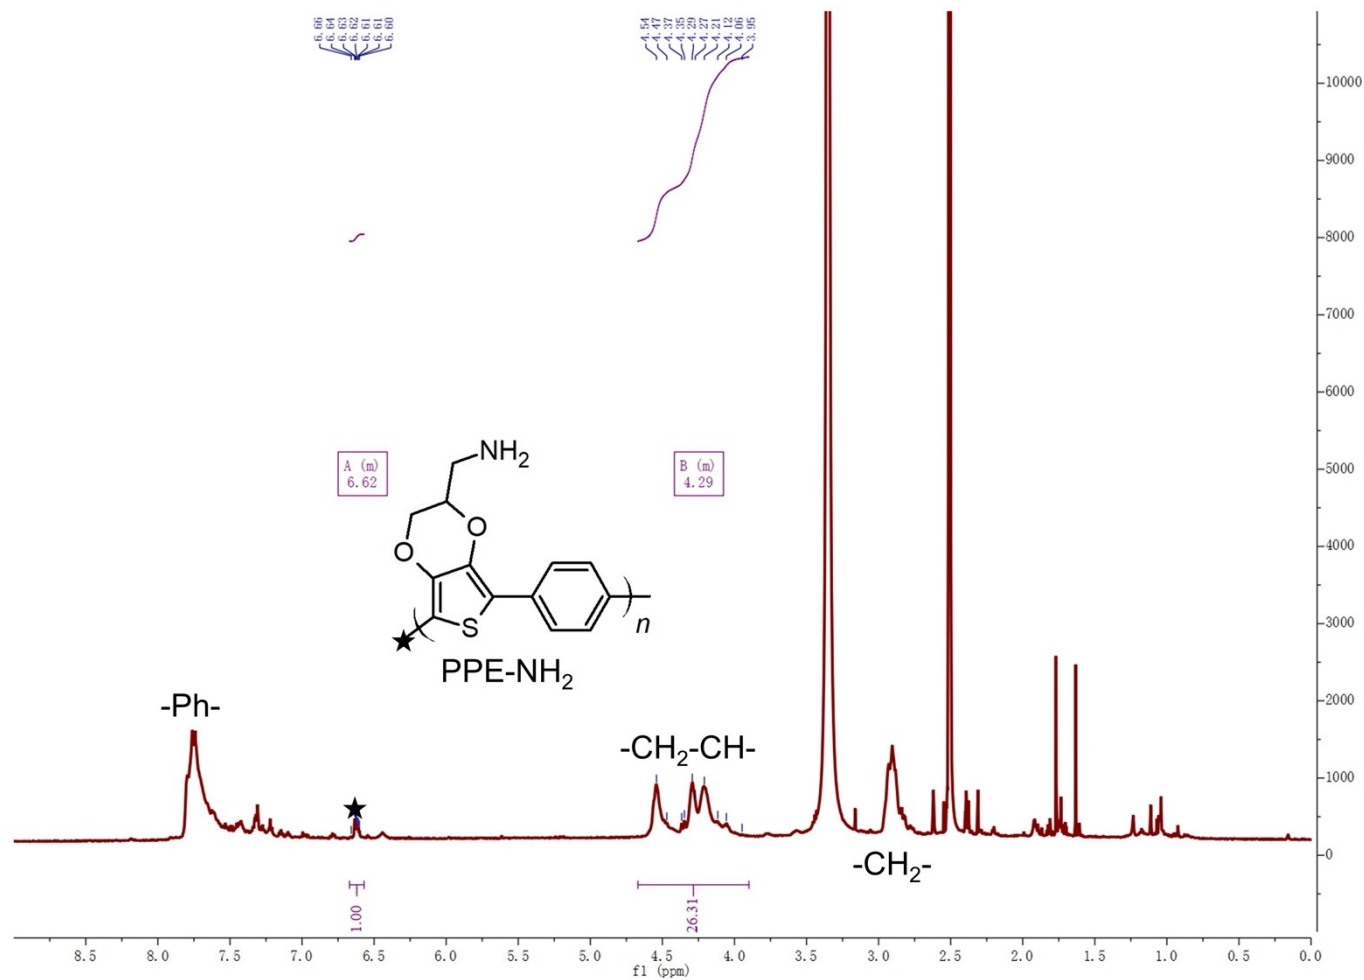

$^1\text{H}$  NMR of PPE-NH<sub>2</sub> with entry 9 of Table S8 [600MHz, dimethyl sulfoxide-d<sub>6</sub>/hydrazine hydrate-d<sub>6</sub> (v/v 100:1), 323K]

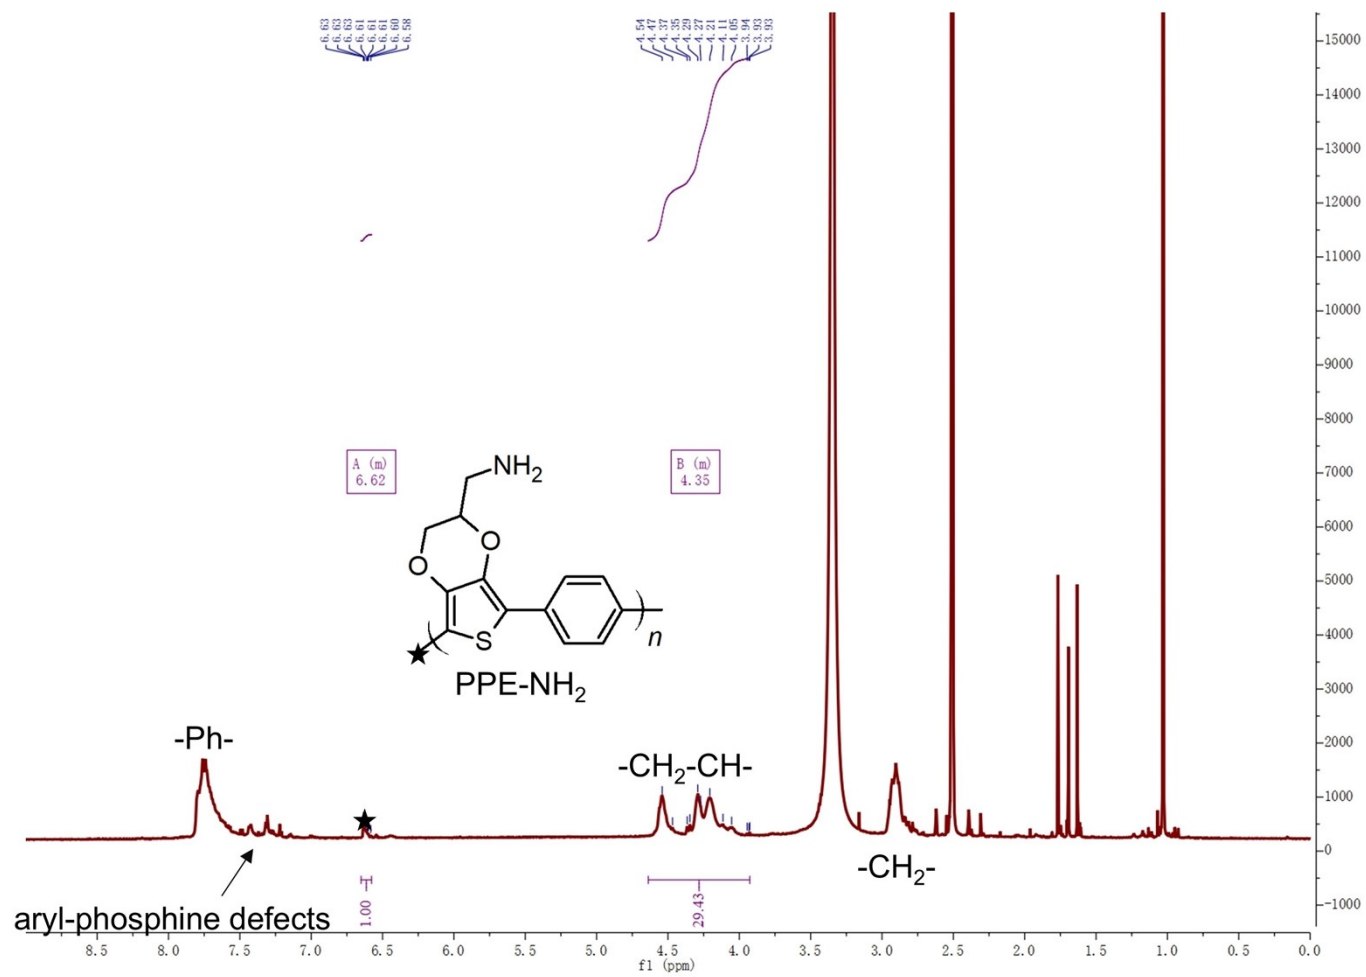

$^1\text{H}$  NMR of PPE-NH<sub>2</sub> with entry 10 of Table S8 [600MHz, dimethyl sulfoxide-d<sub>6</sub>/hydrazine hydrate-d<sub>6</sub> (v/v 100:1), 323K]

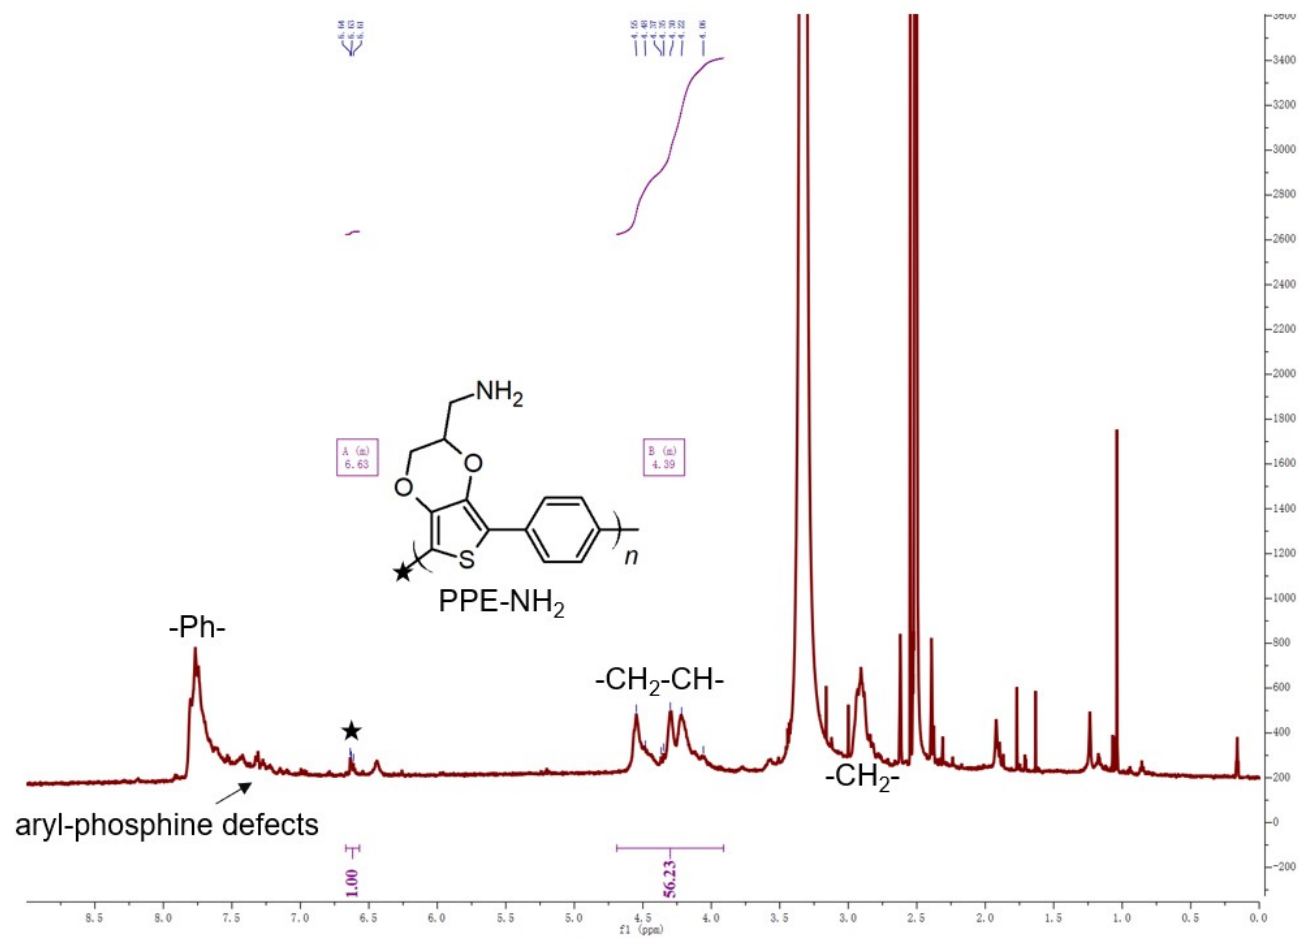

$^1\text{H}$  NMR of PPE-NH<sub>2</sub> with entry 12 of Table S8 [600MHz, dimethyl sulfoxide-d<sub>6</sub>/hydrazine hydrate-d<sub>6</sub> (v/v 100:1), 323K]

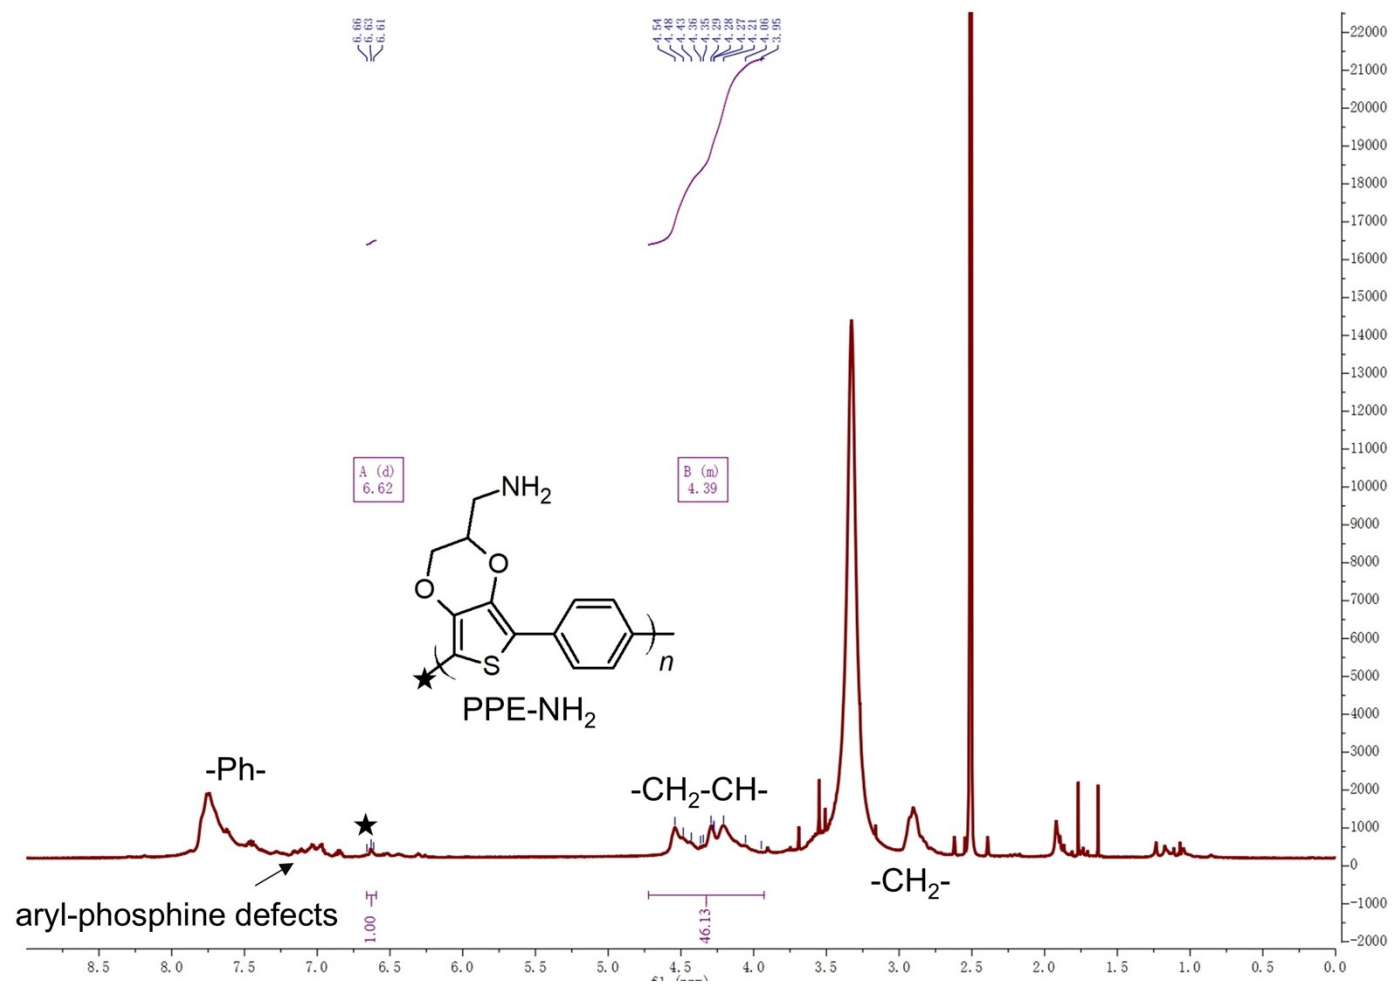

$^1\text{H}$  NMR of PPE-NH<sub>2</sub> with entry 13 of Table S8 [600MHz, dimethyl sulfoxide-d<sub>6</sub>/hydrazine hydrate-d<sub>6</sub> (v/v 100:1), 323K]

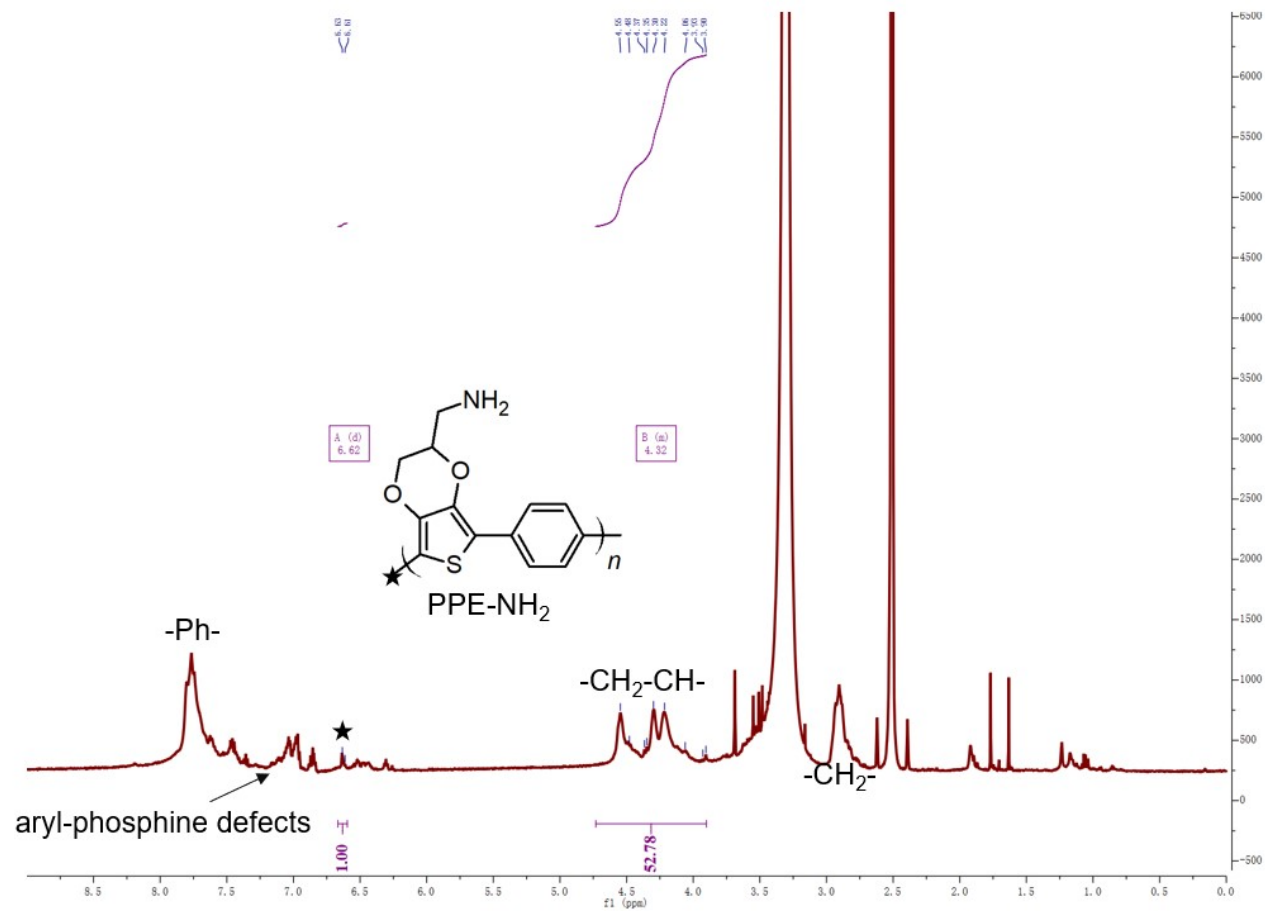

$^1\text{H}$  NMR of PPE-NH<sub>2</sub> with entry 16 of Table S8 [600MHz, dimethyl sulfoxide-d<sub>6</sub>/hydrazine hydrate-d<sub>6</sub> (v/v 100:1), 323K]

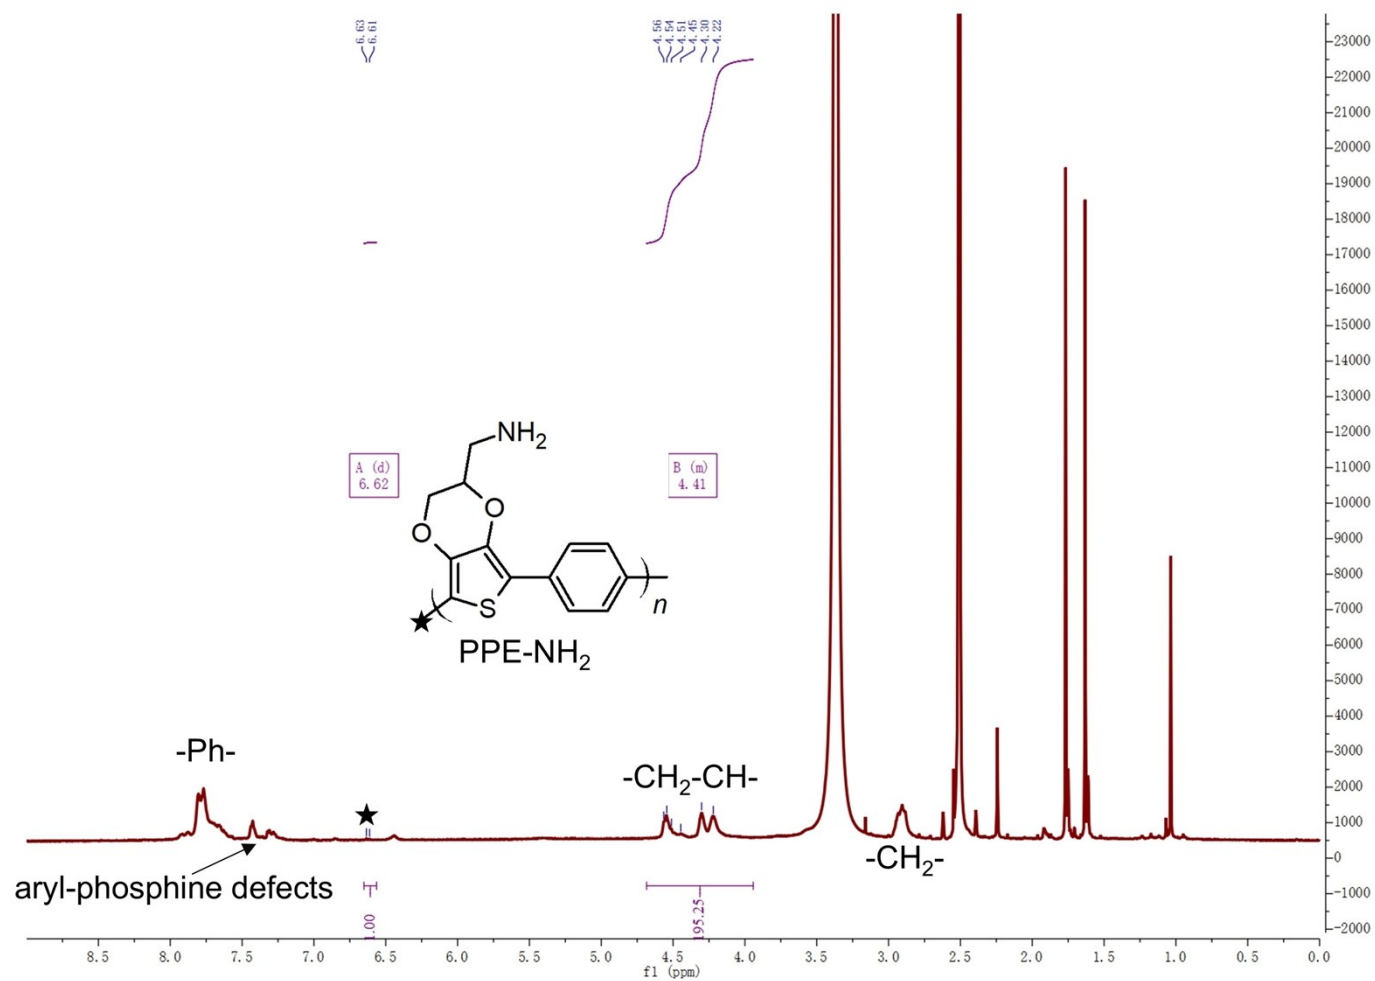

$^1\text{H}$  NMR of PPE-NH<sub>2</sub> with entry 17 of Table S8 [600MHz, dimethyl sulfoxide-d<sub>6</sub>/hydrazine hydrate-d<sub>6</sub> (v/v 100:1), 323K]

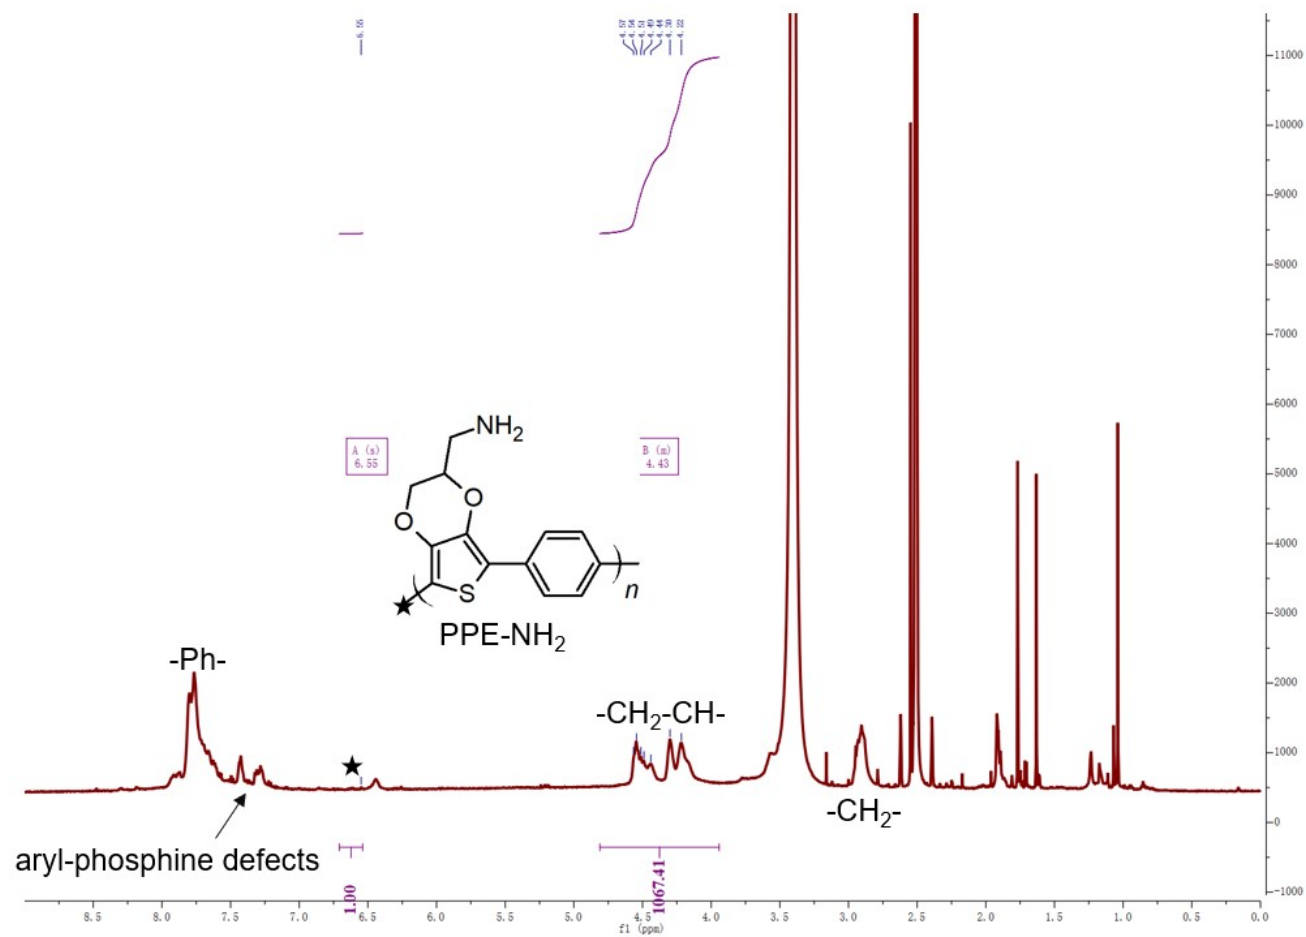

$^1\text{H}$  NMR of PPE-NH<sub>2</sub> with entry 8 of Table S8 [600MHz, dimethyl sulfoxide-d<sub>6</sub>/hydrazine hydrate-d<sub>6</sub> (v/v 100:1), 323K]

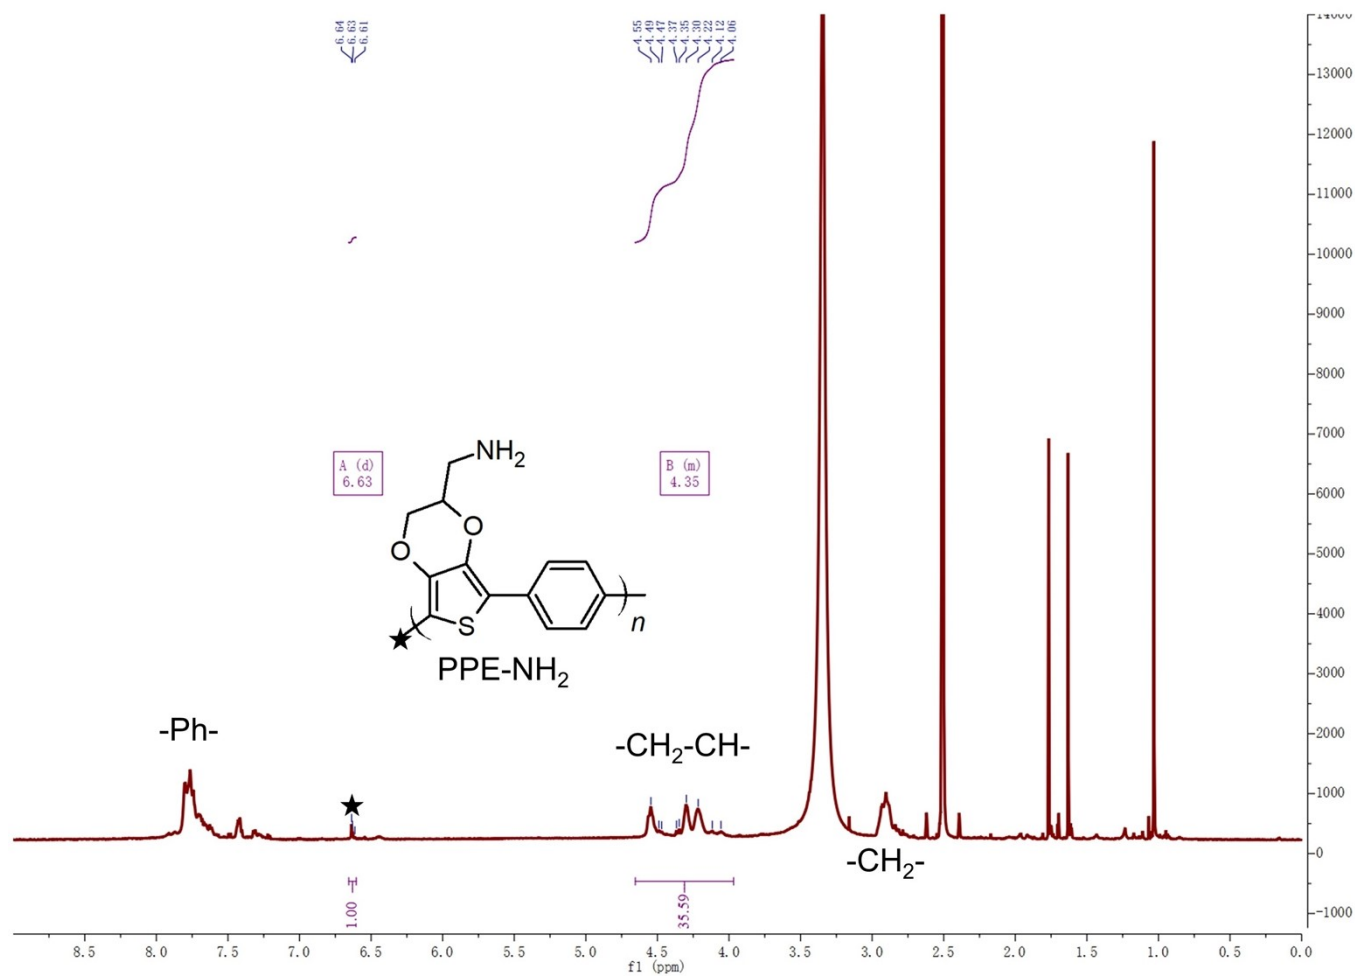

$^1\text{H}$  NMR of PPE-NH<sub>2</sub> with entry 19 of Table S8 [600MHz, dimethyl sulfoxide-d<sub>6</sub>/hydrazine hydrate-d<sub>6</sub> (v/v 100:1), 323K]

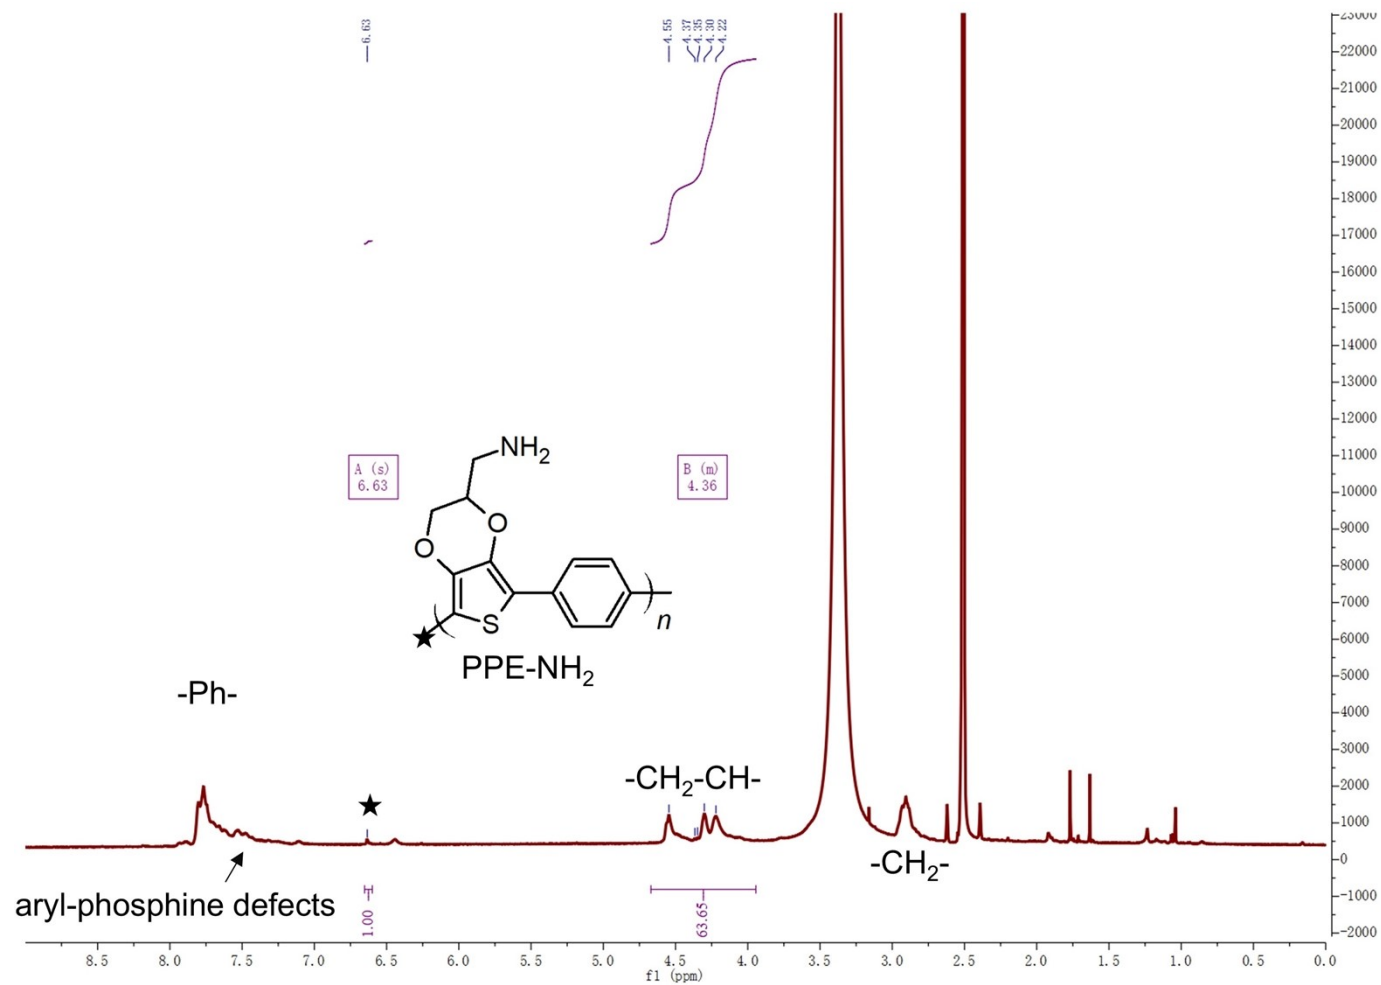

$^1\text{H}$  NMR of PPE-NH<sub>2</sub> with entry 20 of Table S8 [600MHz, dimethyl sulfoxide-d<sub>6</sub>/hydrazine hydrate-d<sub>6</sub> (v/v 100:1), 323K]

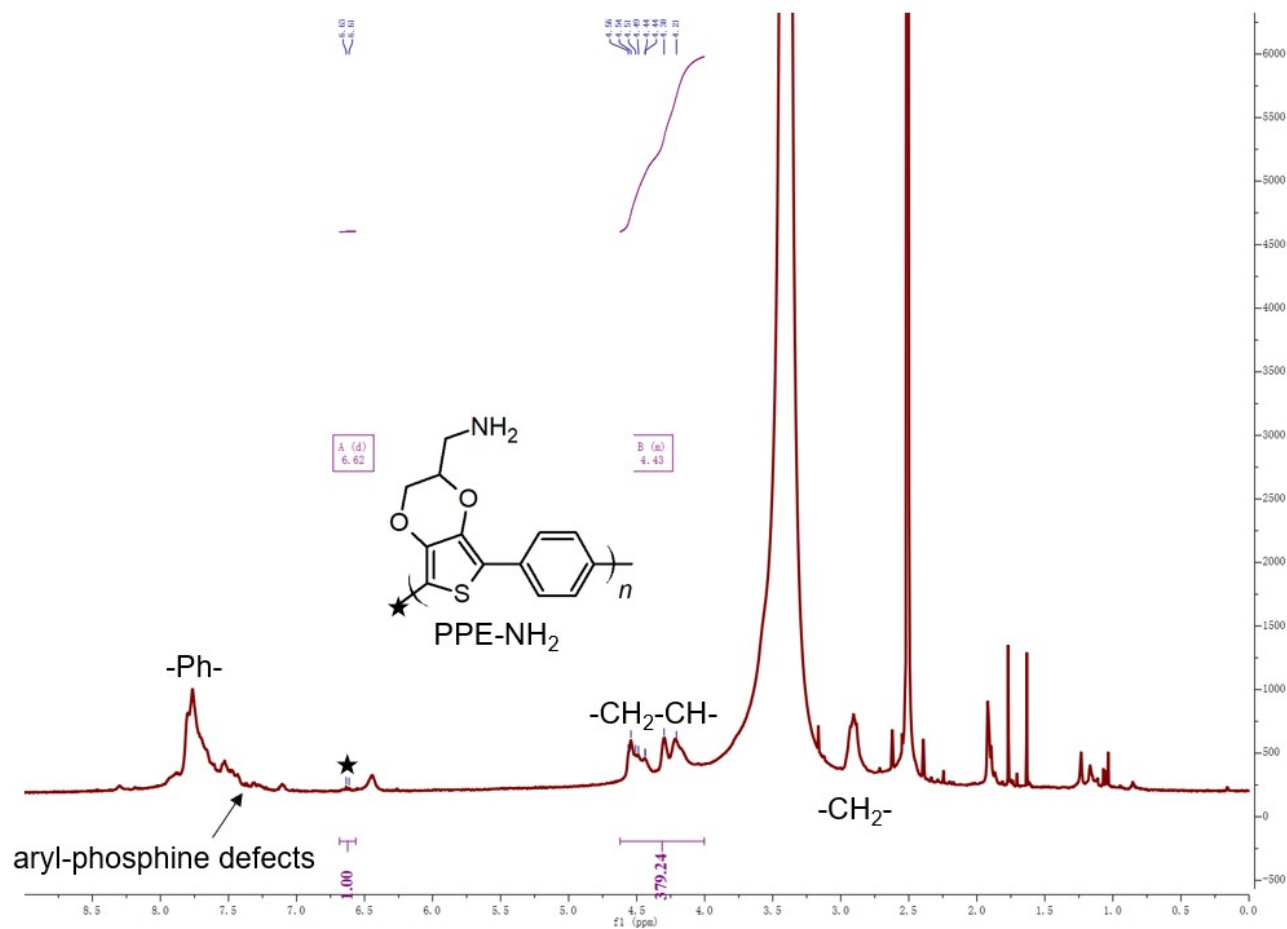

$^1\text{H}$  NMR of PPE-NH<sub>2</sub> with entry 8 of Table S8 [600MHz, dimethyl sulfoxide-d<sub>6</sub>/hydrazine hydrate-d<sub>6</sub> (v/v 100:1), 323K]

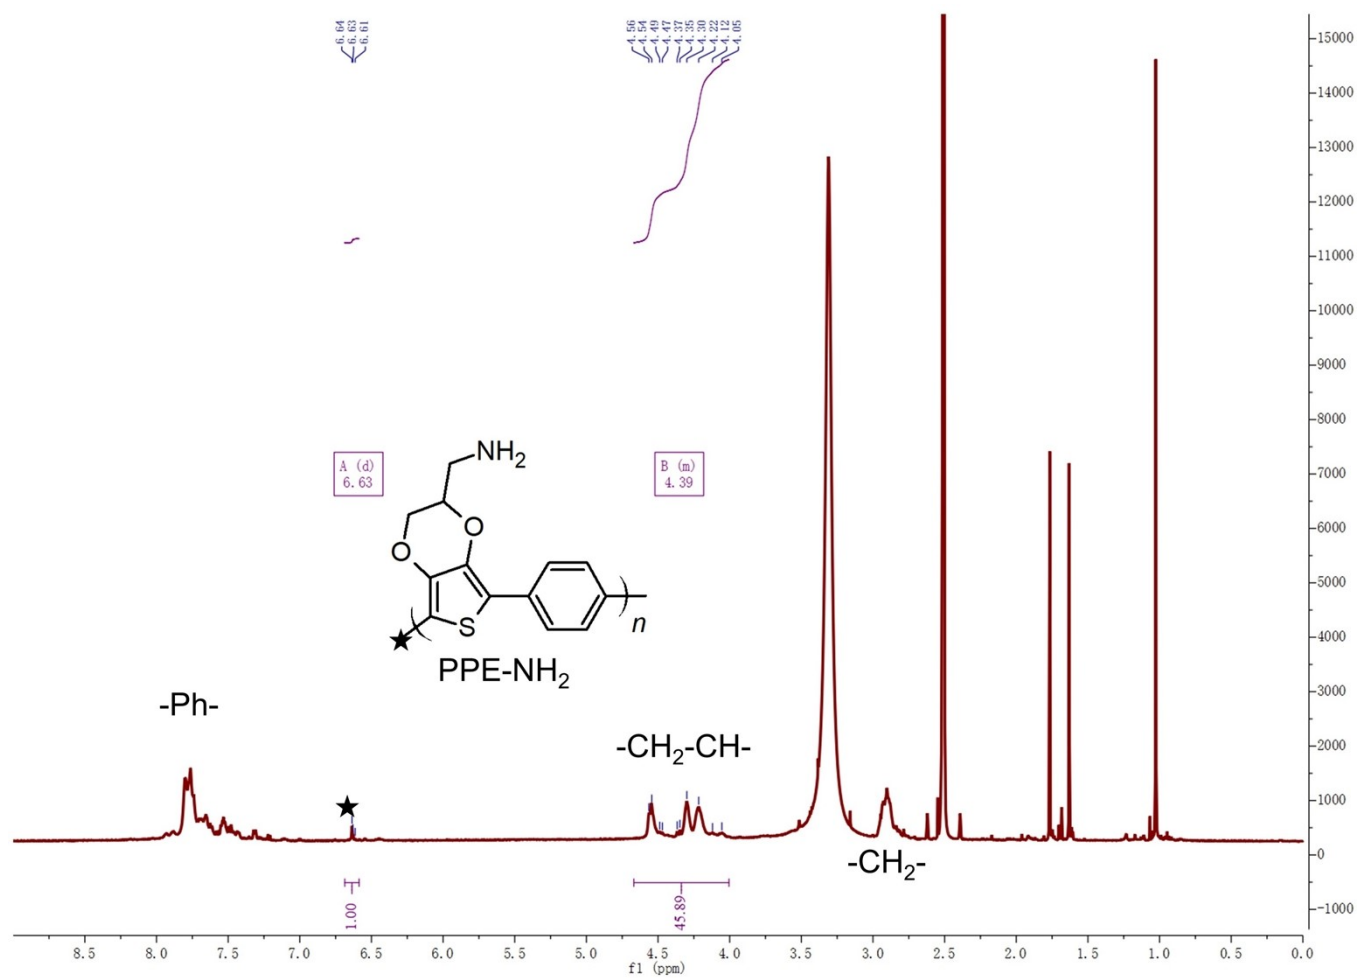

$^1\text{H}$  NMR of PPE-NH<sub>2</sub> with entry 22 of Table S8 [600MHz, dimethyl sulfoxide-d<sub>6</sub>/hydrazine hydrate-d<sub>6</sub> (v/v 100:1), 323K]

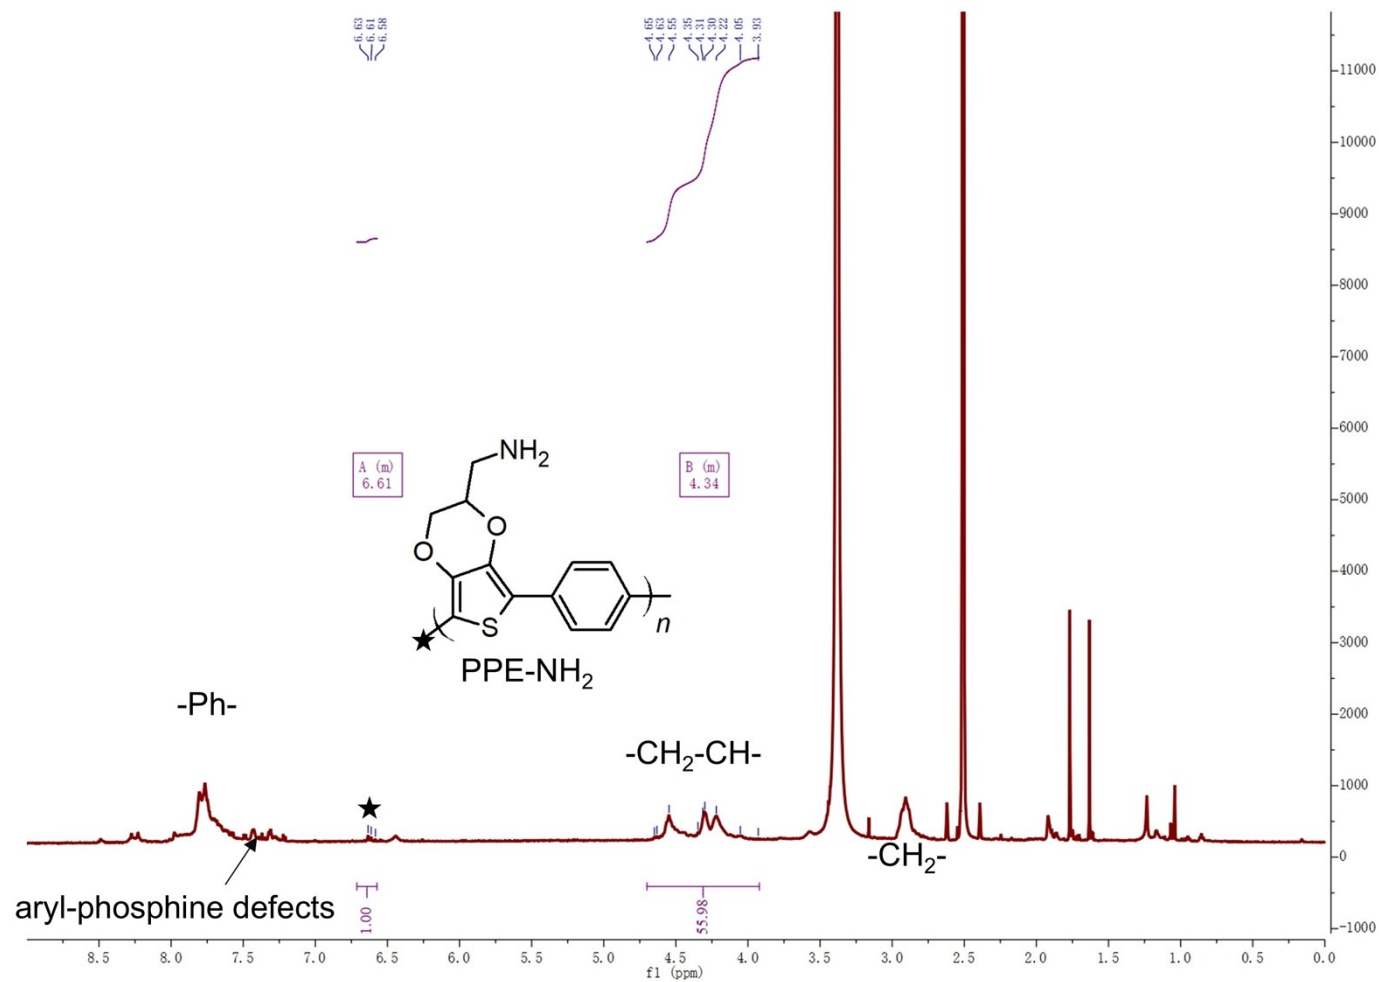

$^1\text{H}$  NMR of PPE-NH<sub>2</sub> with entry 23 of Table S8 [600MHz, dimethyl sulfoxide-d<sub>6</sub>/hydrazine hydrate-d<sub>6</sub> (v/v 100:1), 323K]

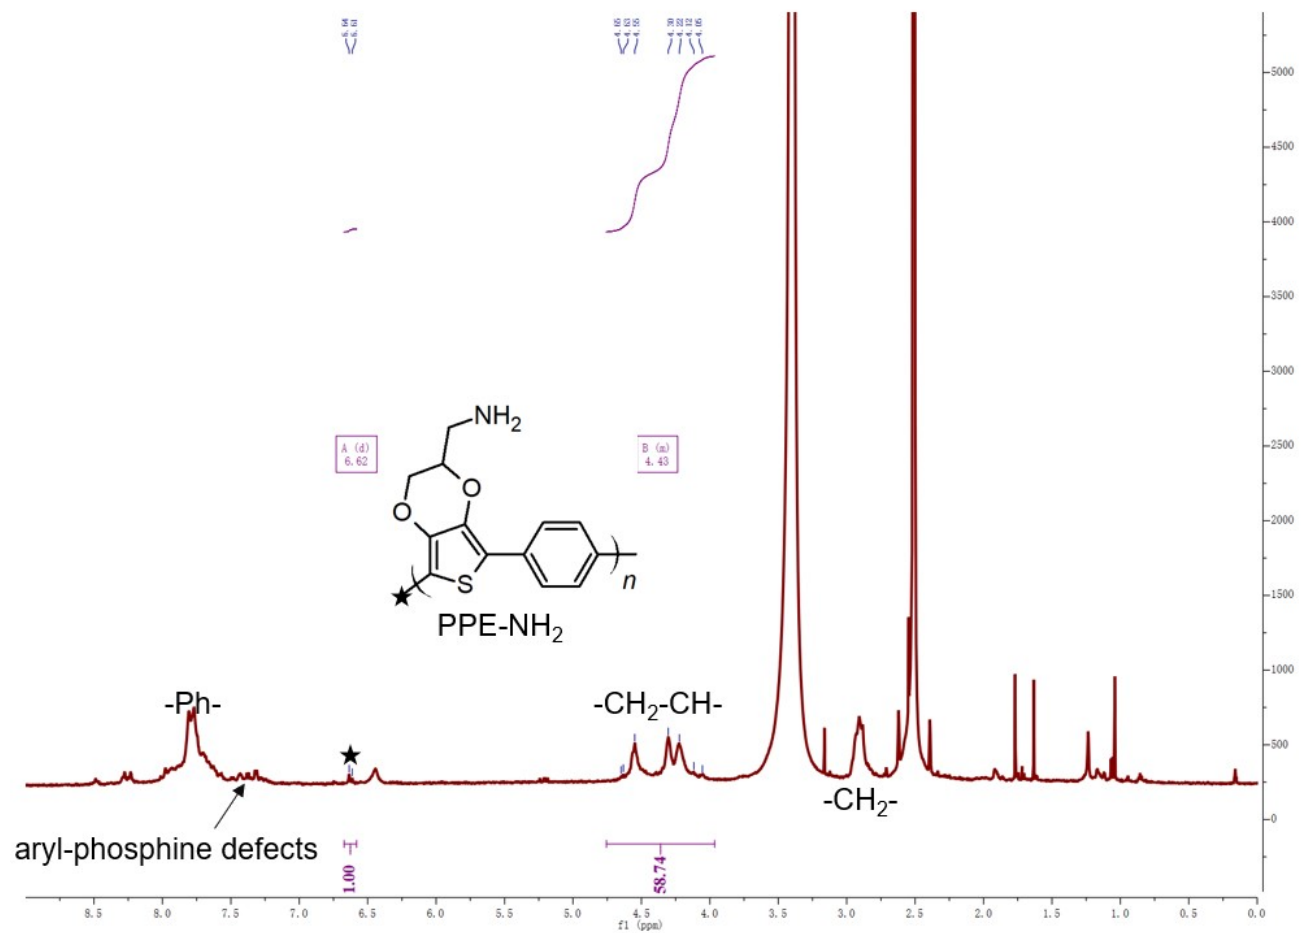

$^1\text{H}$  NMR of PPE-NH<sub>2</sub> with entry 25 of Table S8 [600MHz, dimethyl sulfoxide-d<sub>6</sub>/hydrazine hydrate-d<sub>6</sub> (v/v 100:1), 323K]

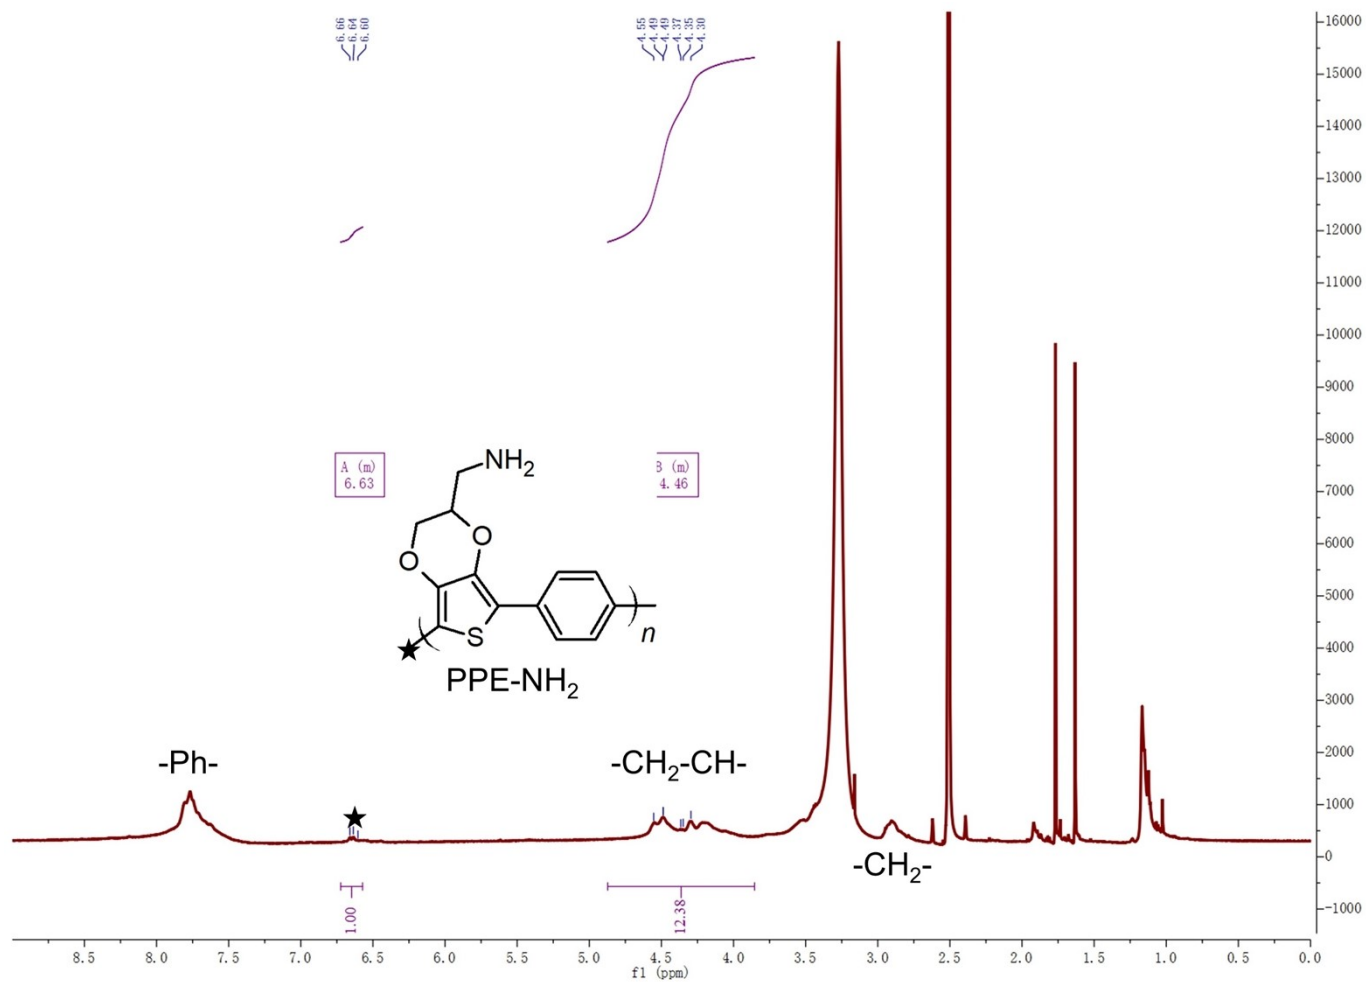

$^1\text{H}$  NMR of PPE-NH<sub>2</sub> with entry 26 of Table S8 [600MHz, dimethyl sulfoxide-d<sub>6</sub>/hydrazine hydrate-d<sub>6</sub> (v/v 100:1), 323K]

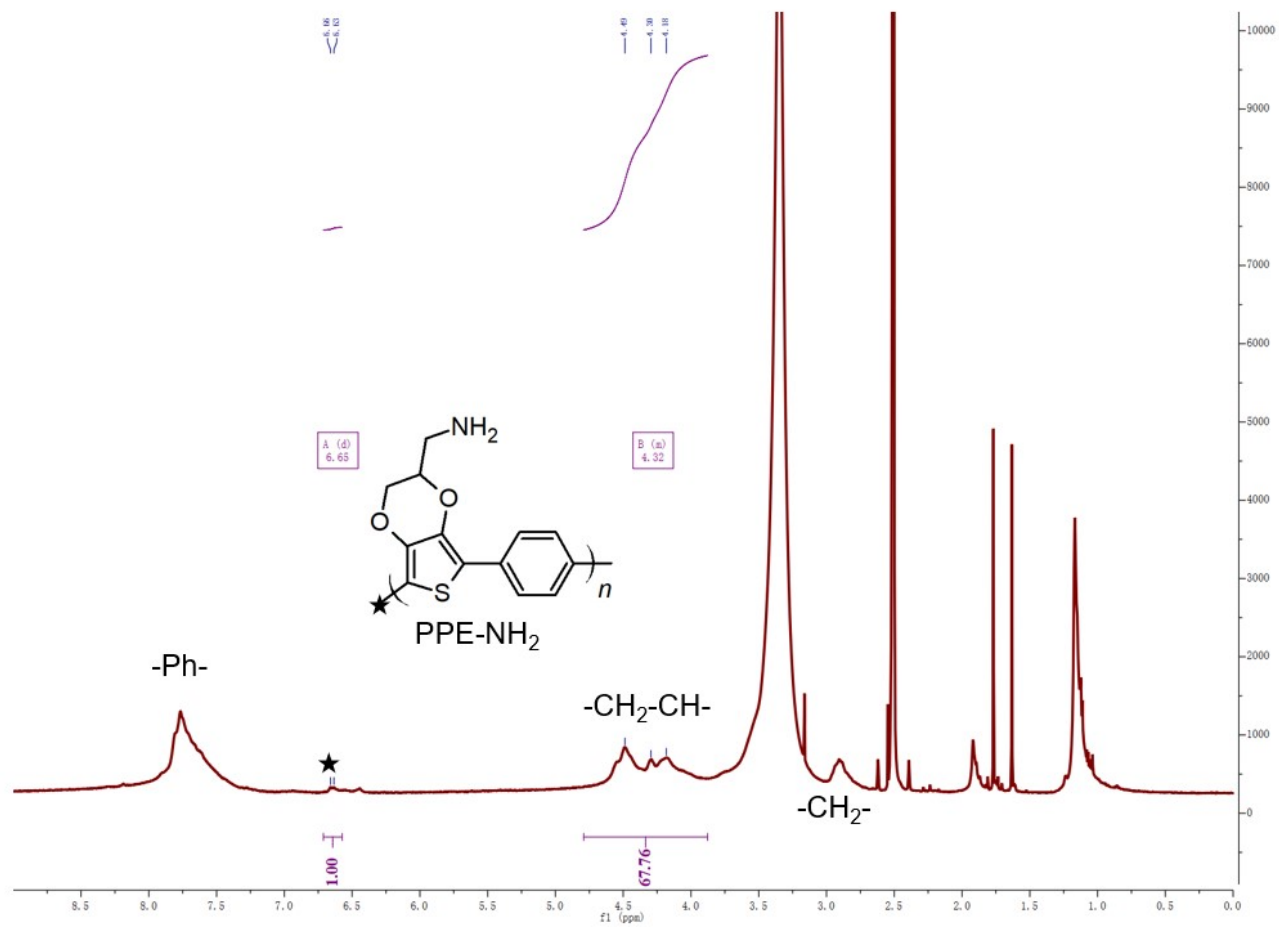

$^1\text{H}$  NMR of PPE-NH<sub>2</sub> with entry 29 of Table S8 [600MHz, dimethyl sulfoxide-d<sub>6</sub>/hydrazine hydrate-d<sub>6</sub> (v/v 100:1), 323K]

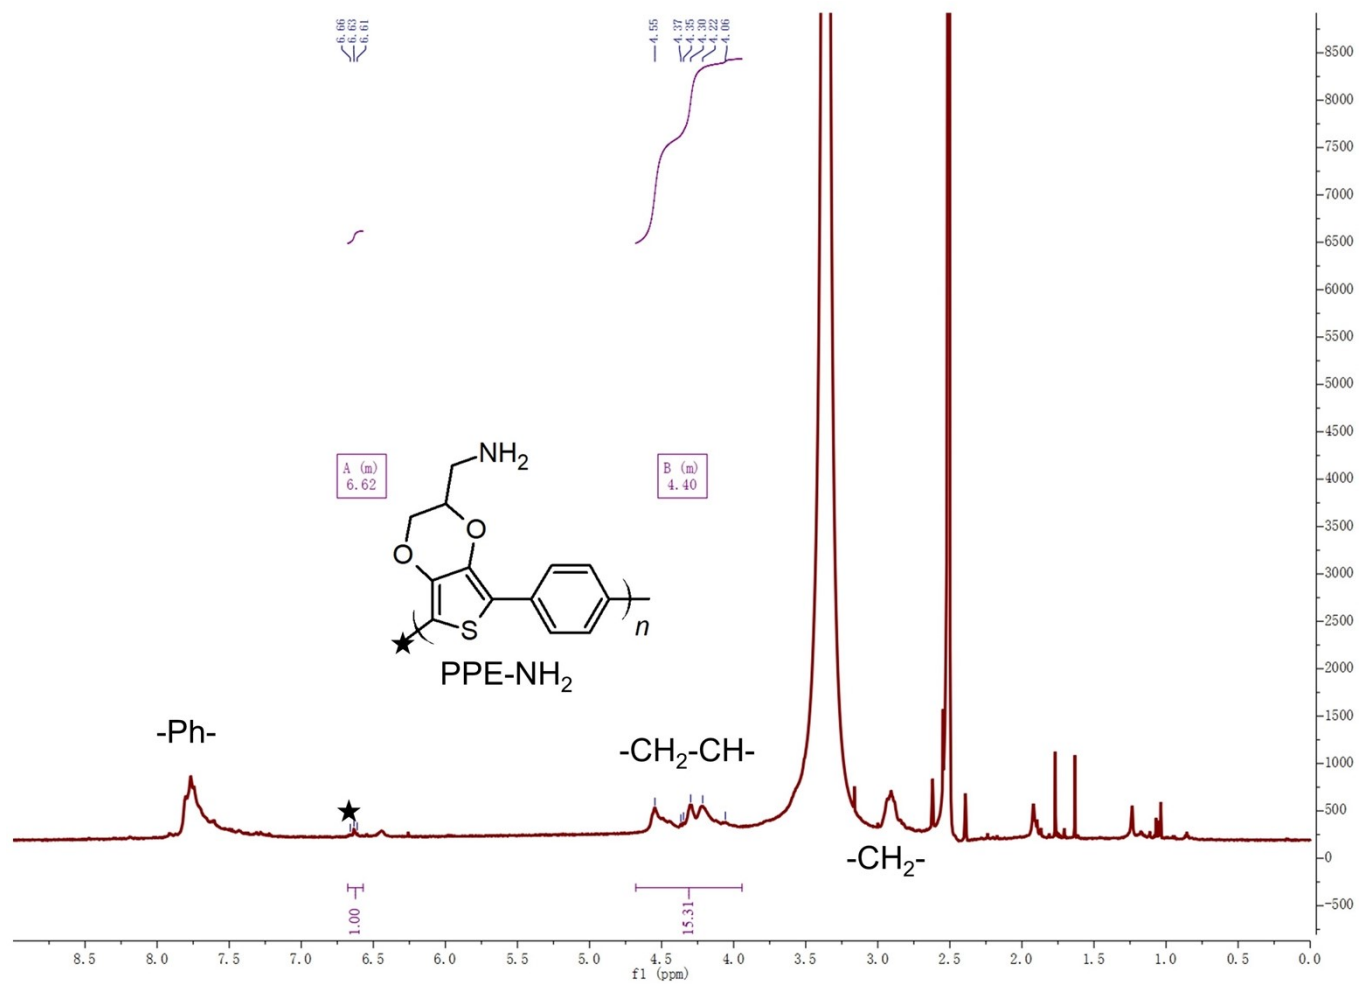

$^1\text{H}$  NMR of PPE-NH<sub>2</sub> with entry 30 of Table S8 [600MHz, dimethyl sulfoxide-d<sub>6</sub>/hydrazine hydrate-d<sub>6</sub> (v/v 100:1), 323K]

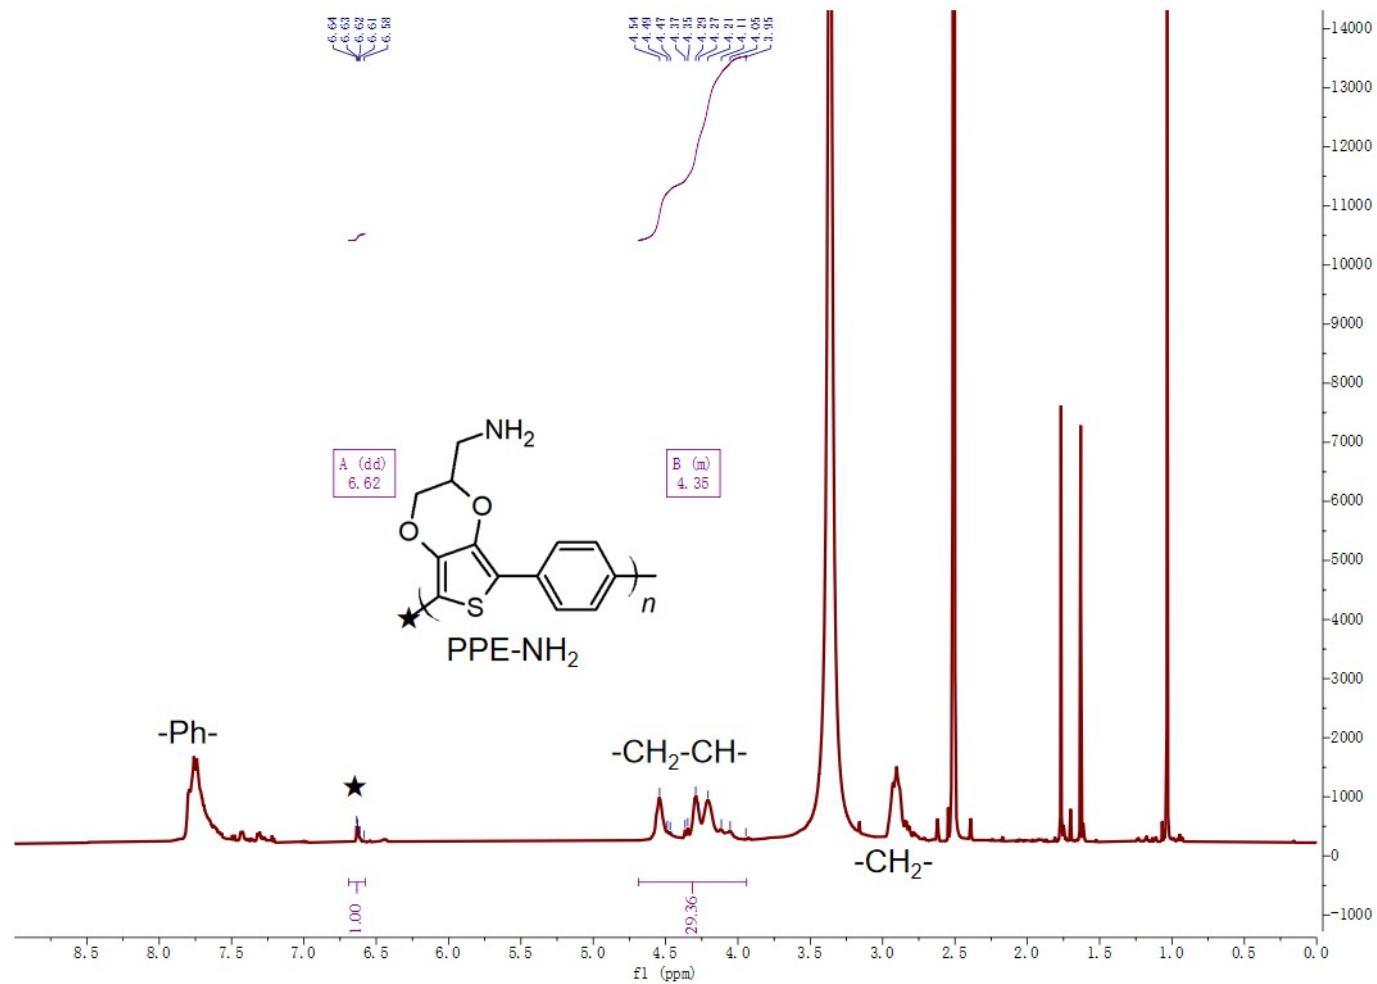

## 7.2 NMR spectra of Small molecular Model for direct arylation of EDOT derivatives with bromoarenes.

$^1\text{H}$  NMR collected at different time points direct arylation of EDOT-NH<sub>2</sub> with 2-bromo-5-methylthiophene assisted by L1 (DMSO-d<sub>6</sub>)

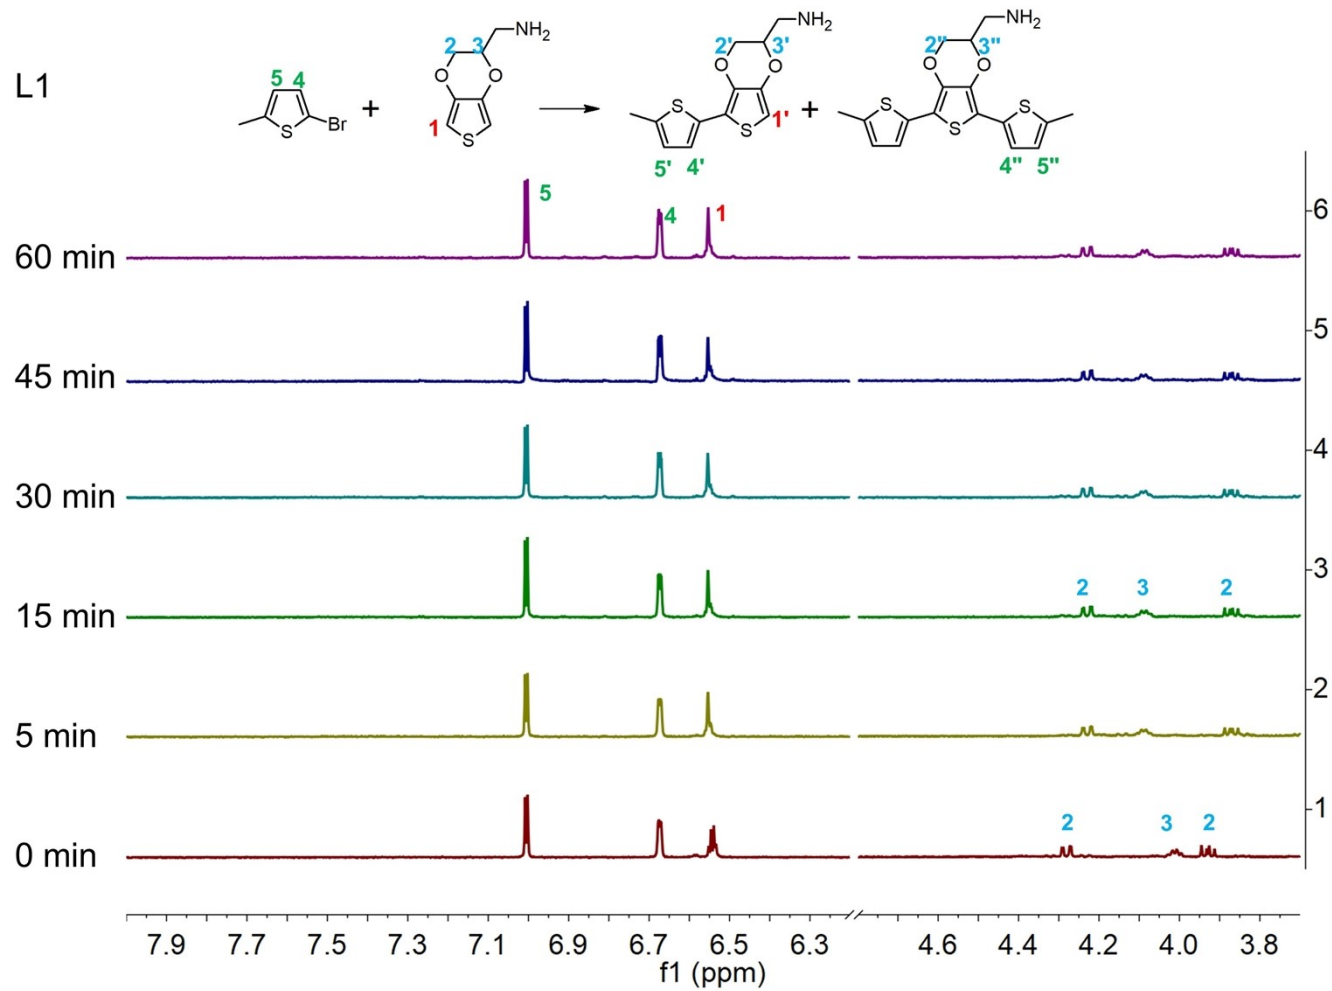

<sup>1</sup>H NMR collected at different time points direct arylation of EDOT-NH<sub>2</sub> with 2-bromo-5-methylthiophene assisted by L2 (DMSO-d<sub>6</sub>)

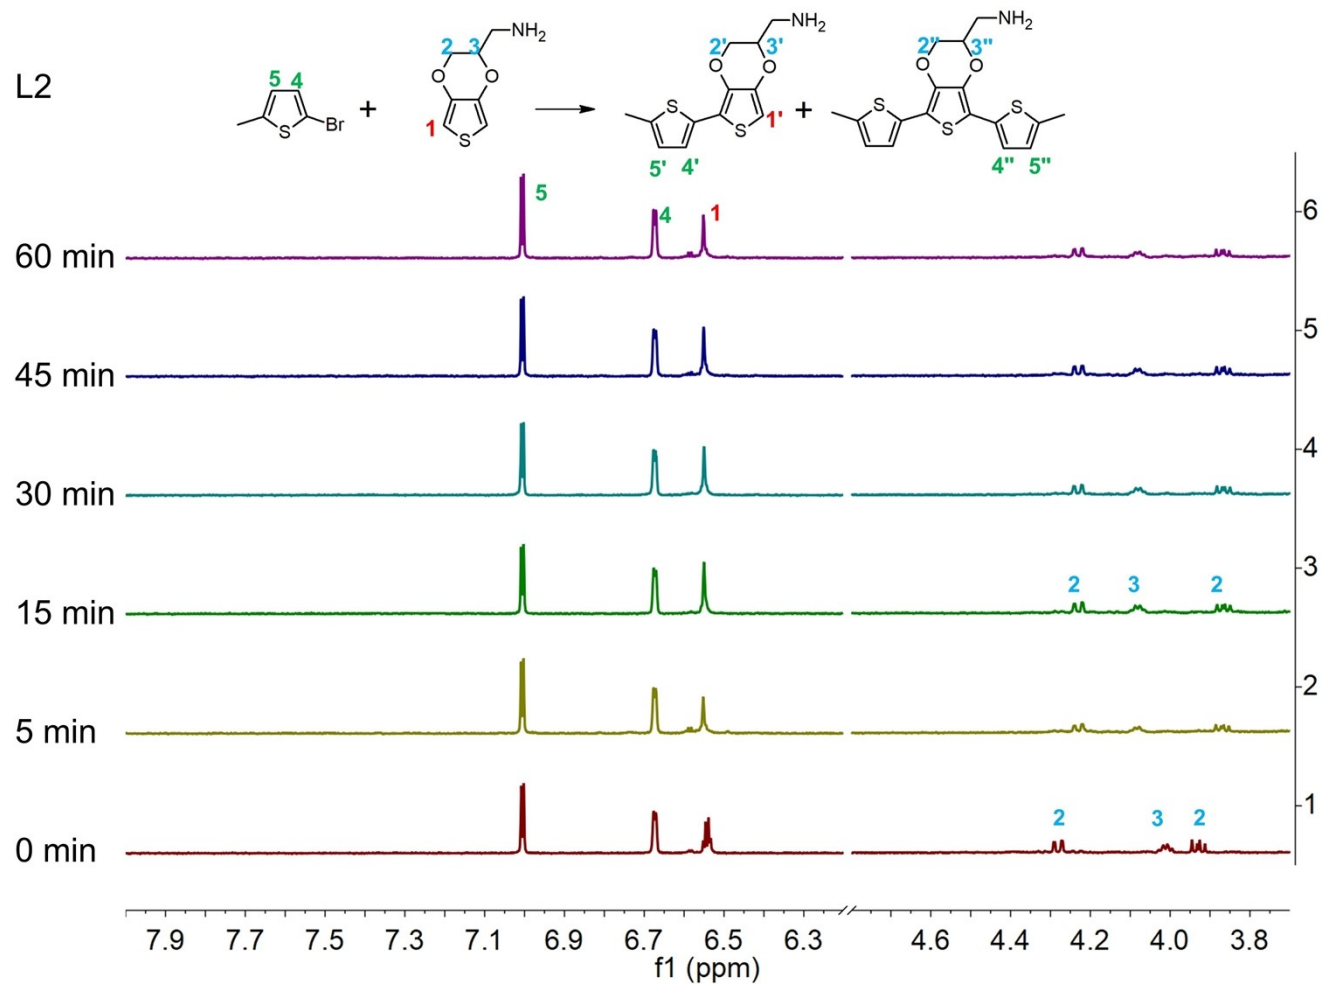

$^1\text{H}$  NMR collected at different time points direct arylation of EDOT-NH<sub>2</sub> with 2-bromo-5-methylthiophene assisted by L3 (DMSO-d<sub>6</sub>)

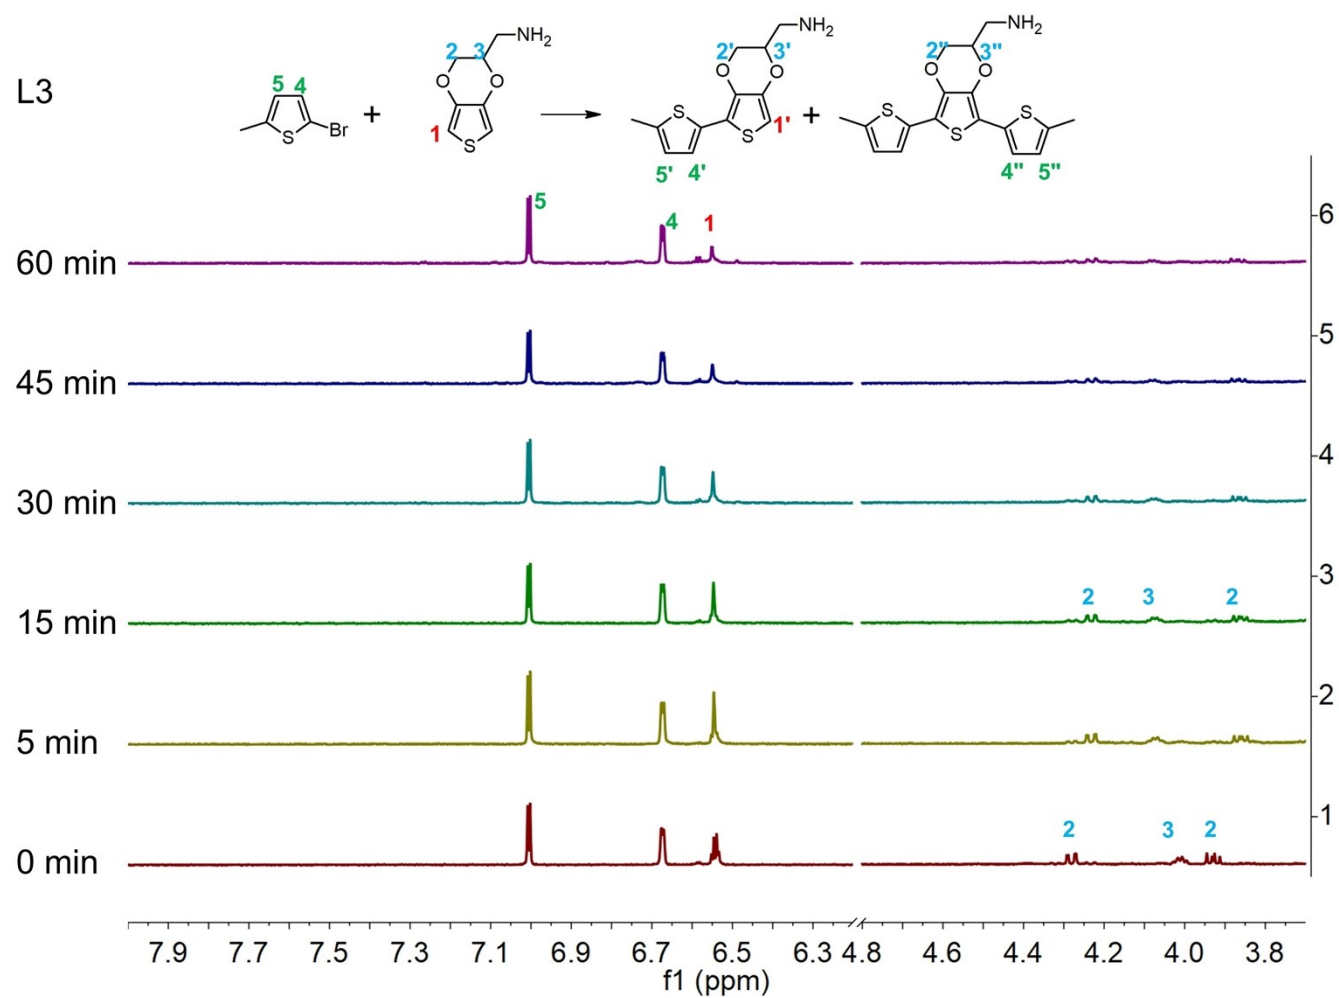

$^1\text{H}$  NMR collected at different time points direct arylation of EDOT-NH<sub>2</sub> with 2-bromo-5-methylthiophene assisted by L4 (DMSO-d<sub>6</sub>)

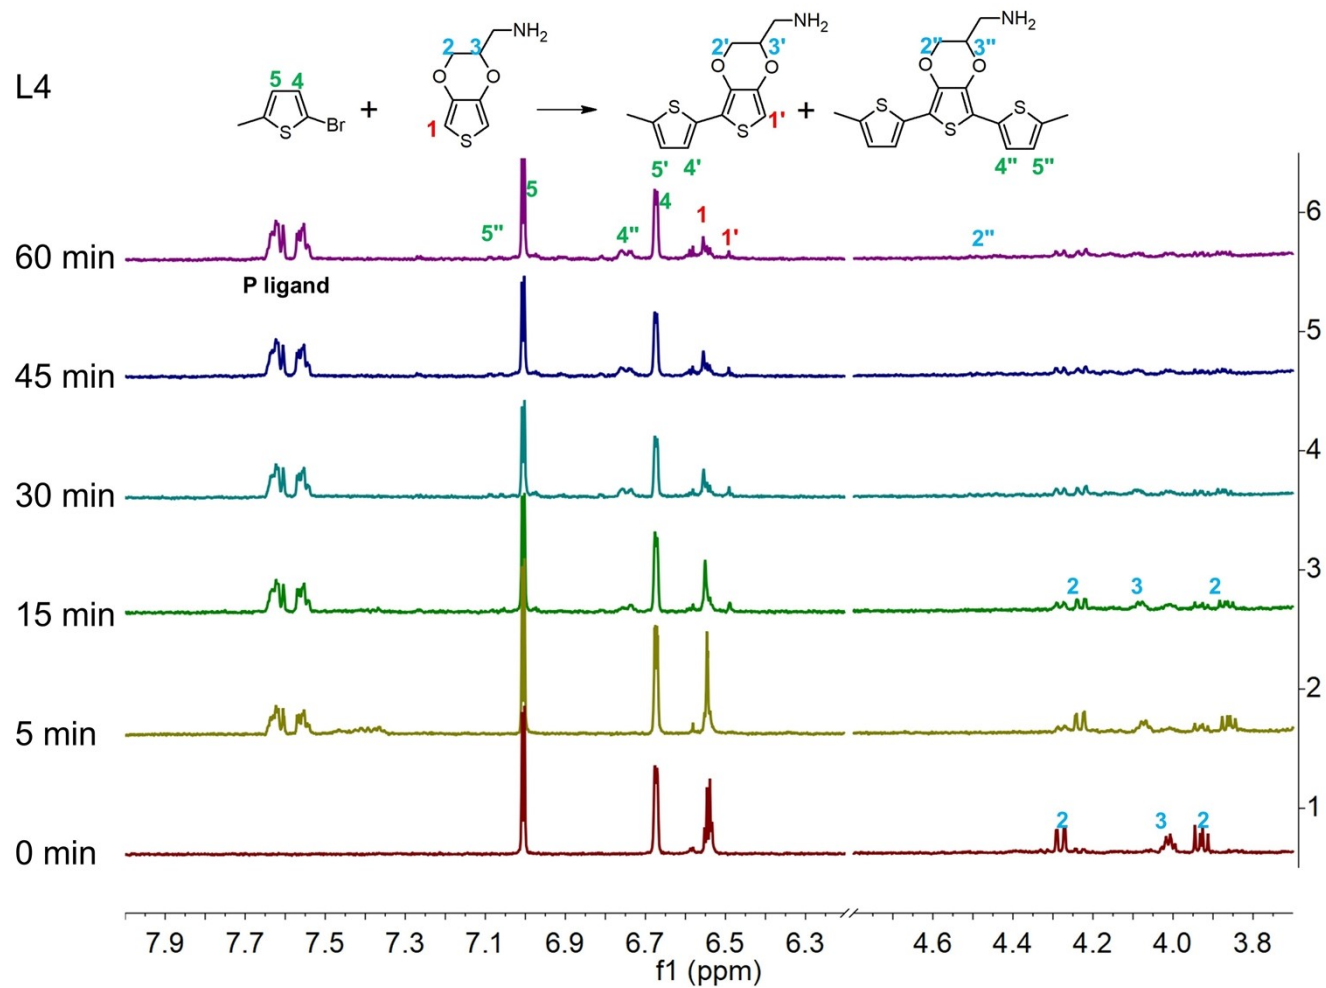

$^1\text{H}$  NMR collected at different time points direct arylation of EDOT-NH<sub>2</sub> with 2-bromo-5-methylthiophene assisted by L5 (DMSO-d<sub>6</sub>)

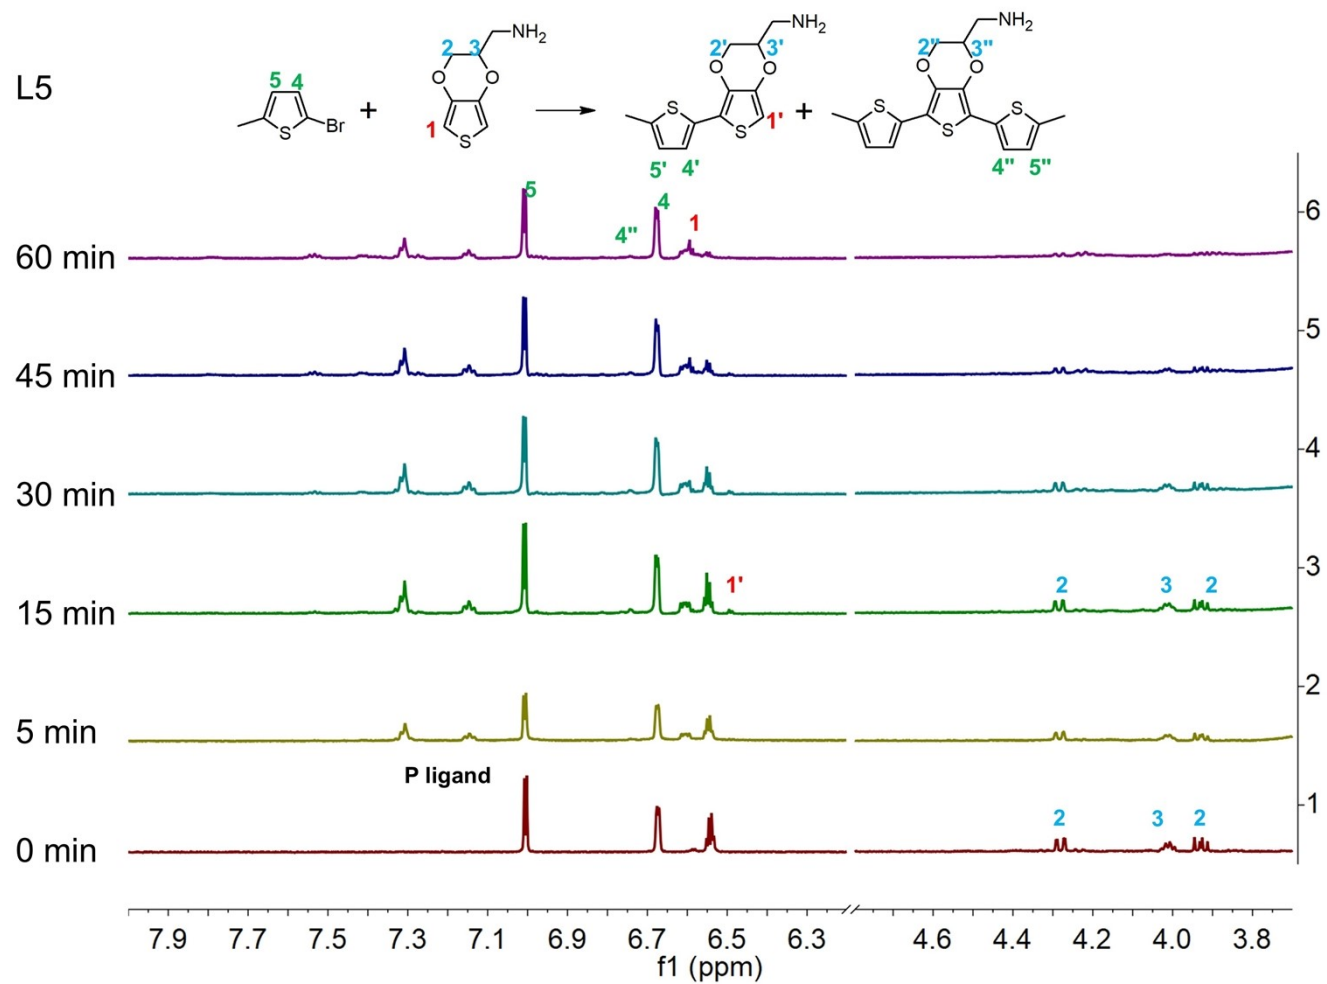

$^1\text{H}$  NMR collected at different time points direct arylation of EDOT-NH<sub>2</sub> with 2-bromo-5-methylthiophene assisted by L6 (DMSO-d<sub>6</sub>)

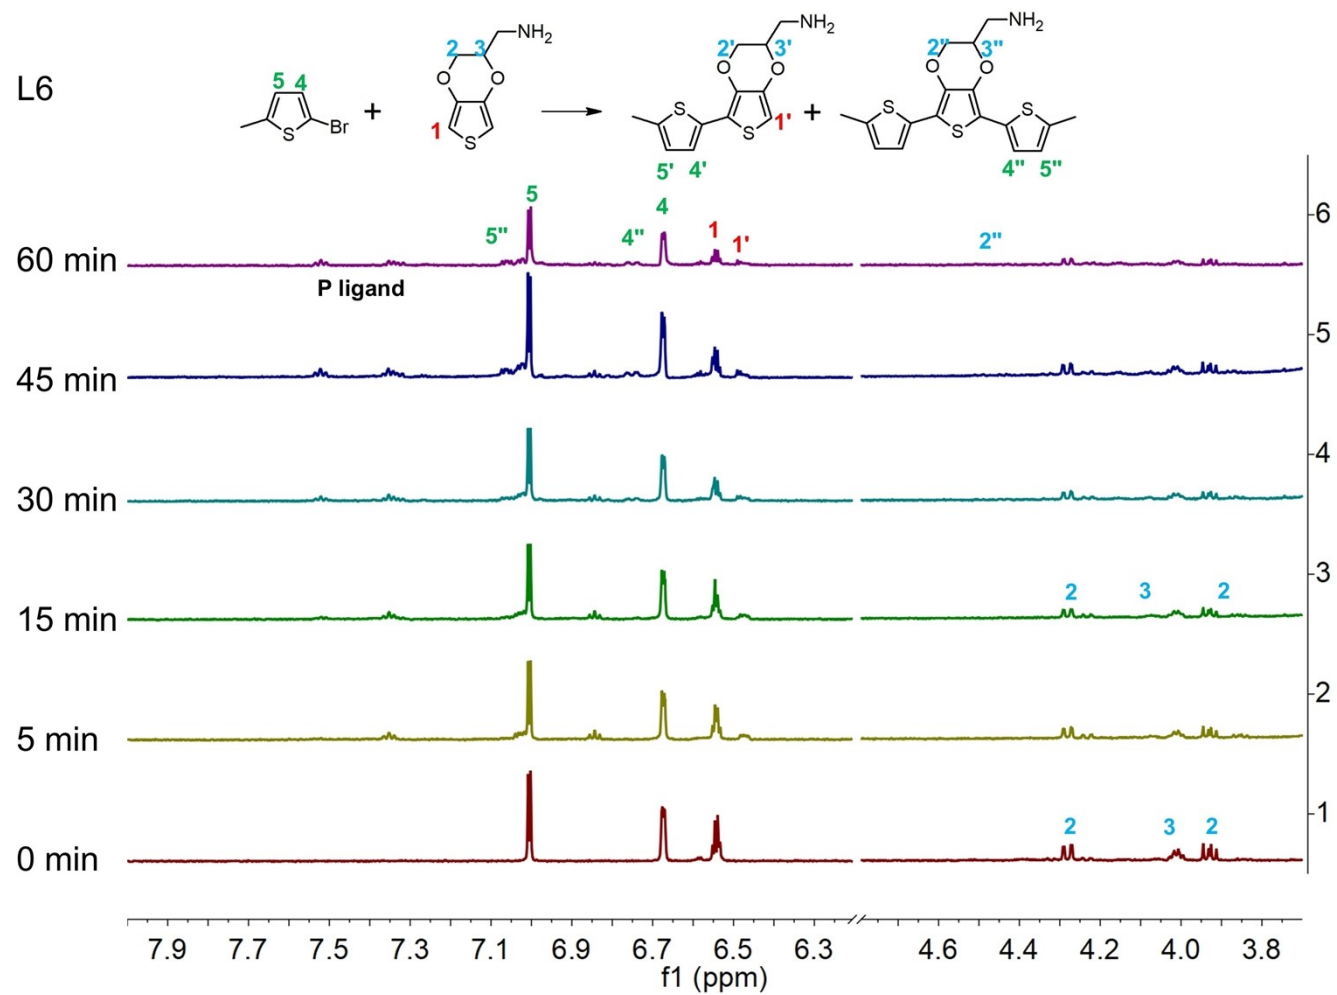

$^1\text{H}$  NMR collected at different time points direct arylation of EDOT-NH<sub>2</sub> with 2-bromo-5-methylthiophene assisted by L7 (DMSO-d<sub>6</sub>)

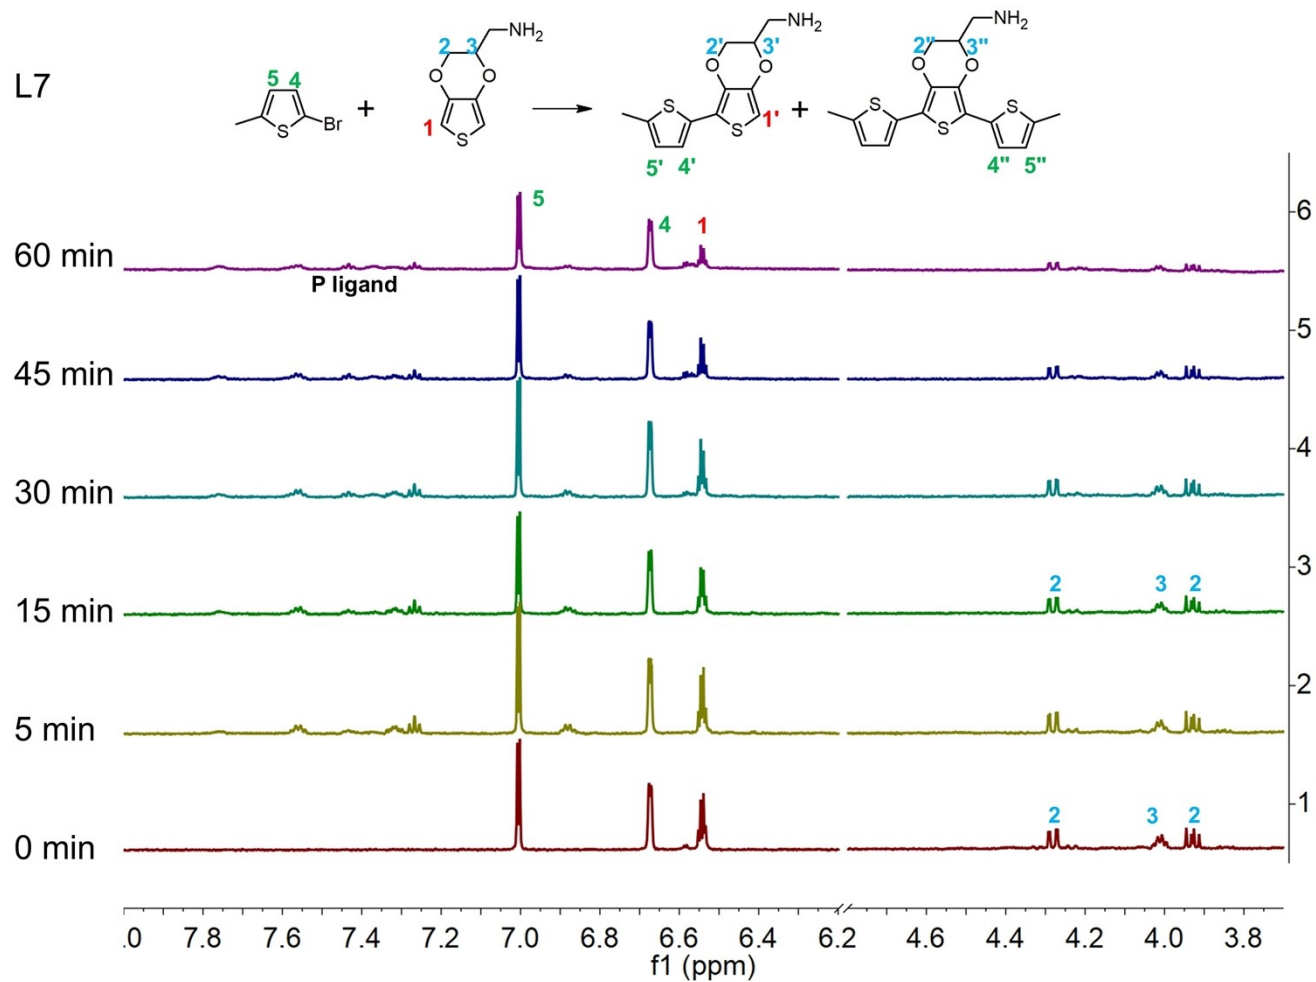

$^1\text{H}$  NMR collected at different time points direct arylation of EDOT-NH<sub>2</sub> with 2-bromo-5-methylthiophene assisted by L8 (DMSO-d<sub>6</sub>)

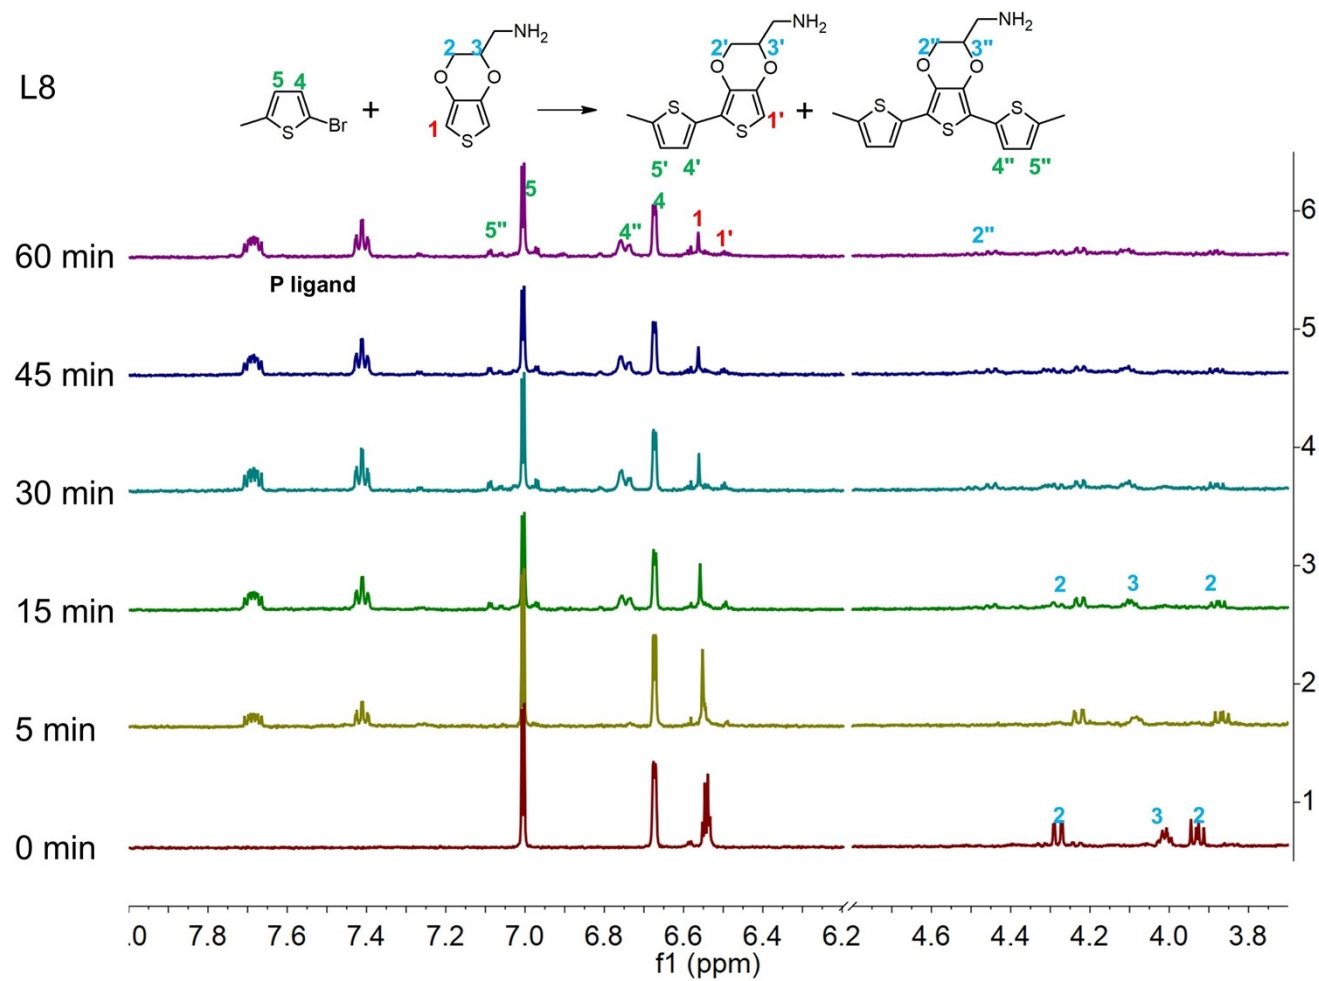

$^1\text{H}$  NMR collected at different time points direct arylation of EDOT-NH<sub>2</sub> with 2-bromo-5-methylthiophene assisted by L9 (DMSO-d<sub>6</sub>)

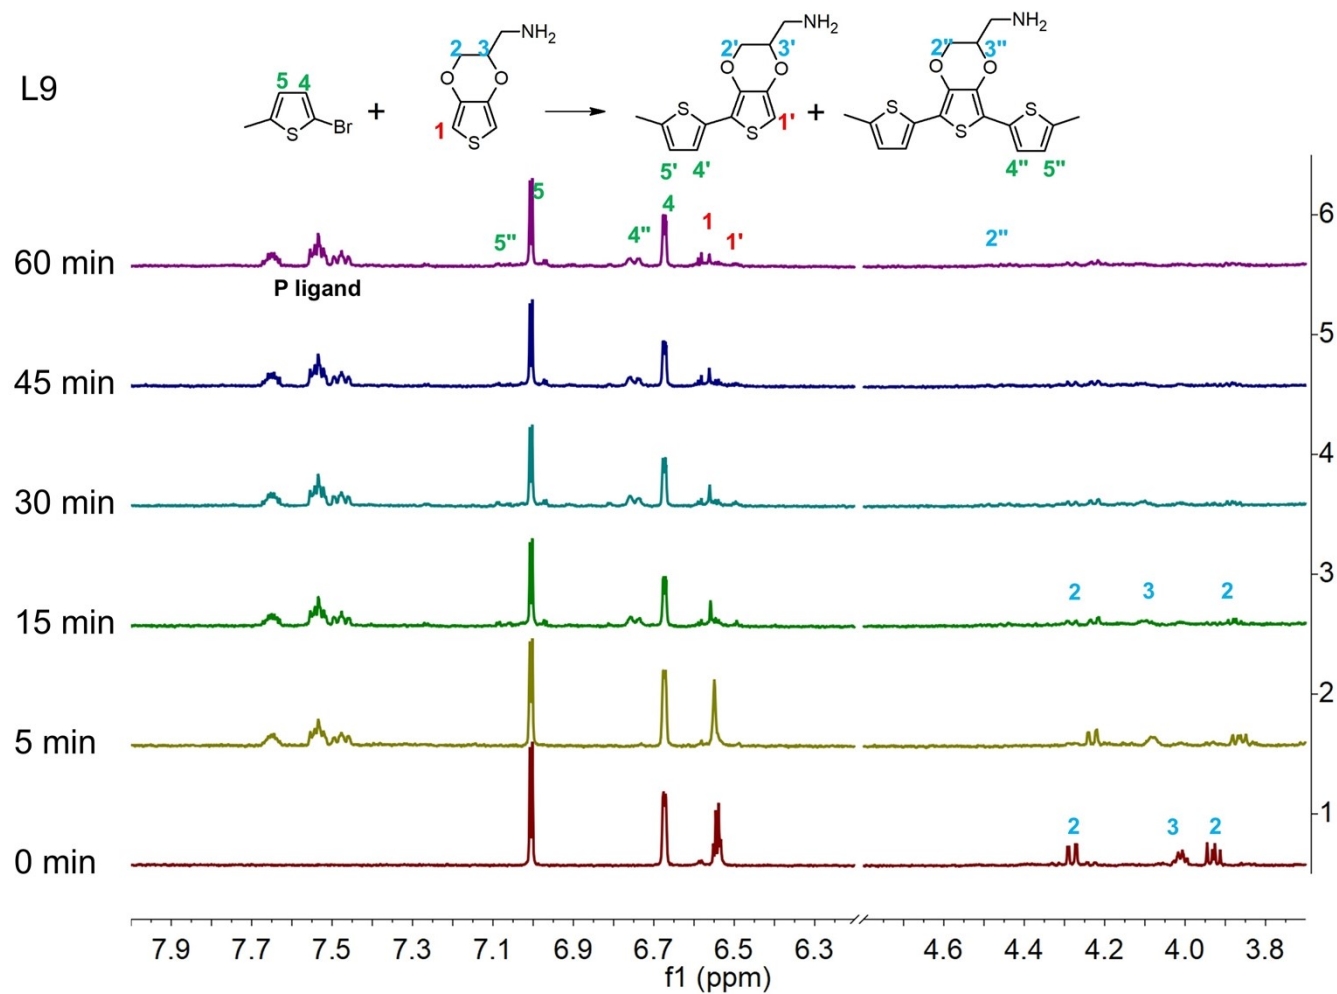

$^1\text{H}$  NMR collected at different time points direct arylation of EDOT-NH<sub>2</sub> with 2-bromo-5-methylthiophene assisted by L10 (DMSO-d<sub>6</sub>)

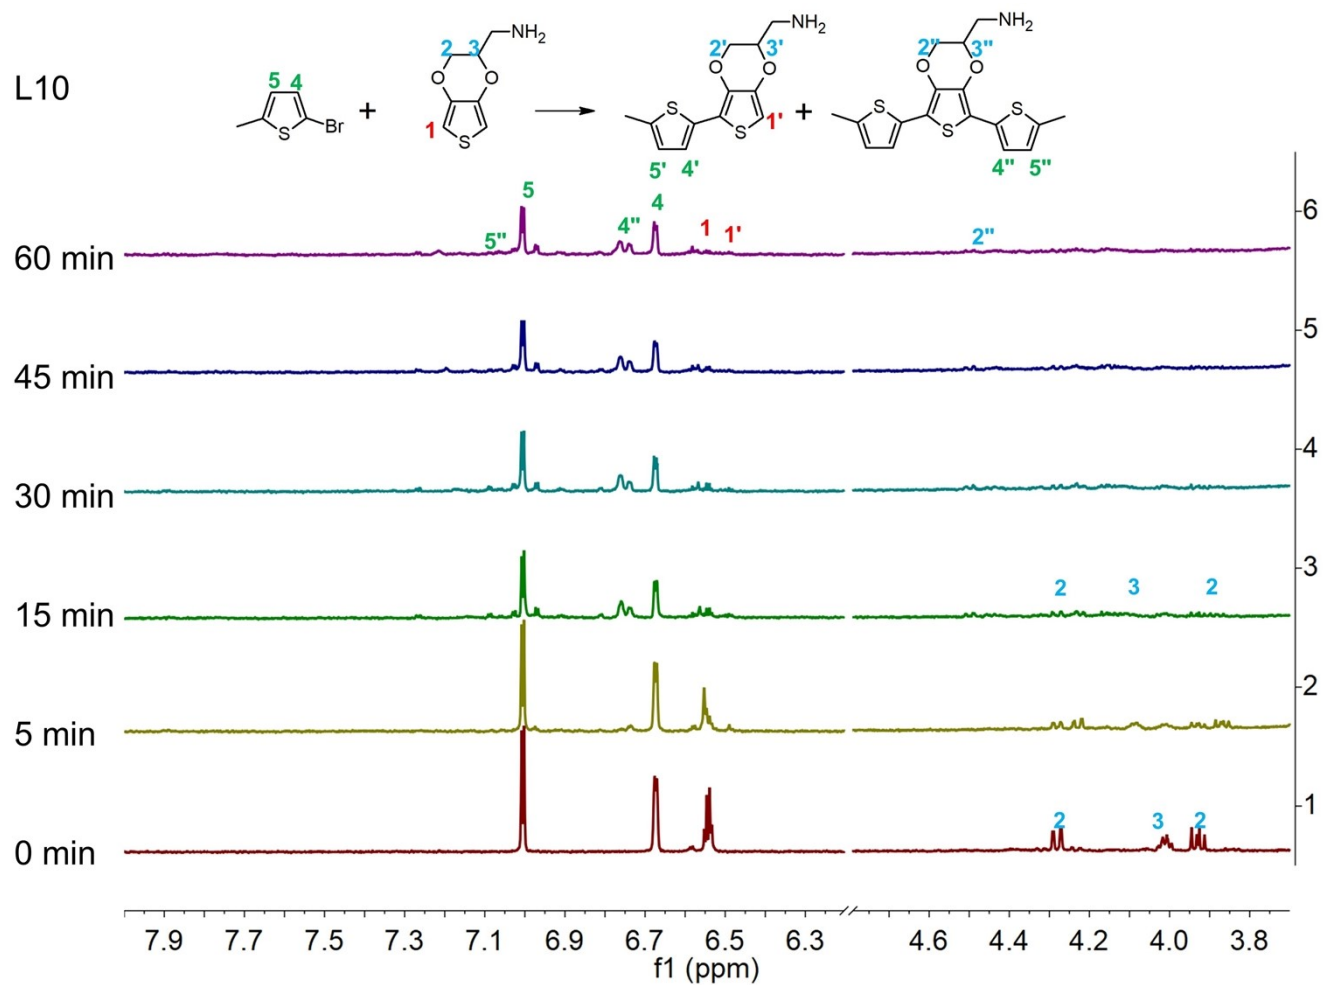

$^1\text{H}$  NMR collected at different time points direct arylation of EDOT-NH<sub>2</sub> with 2-bromo-5-methylthiophene assisted by L11 (DMSO-d<sub>6</sub>)

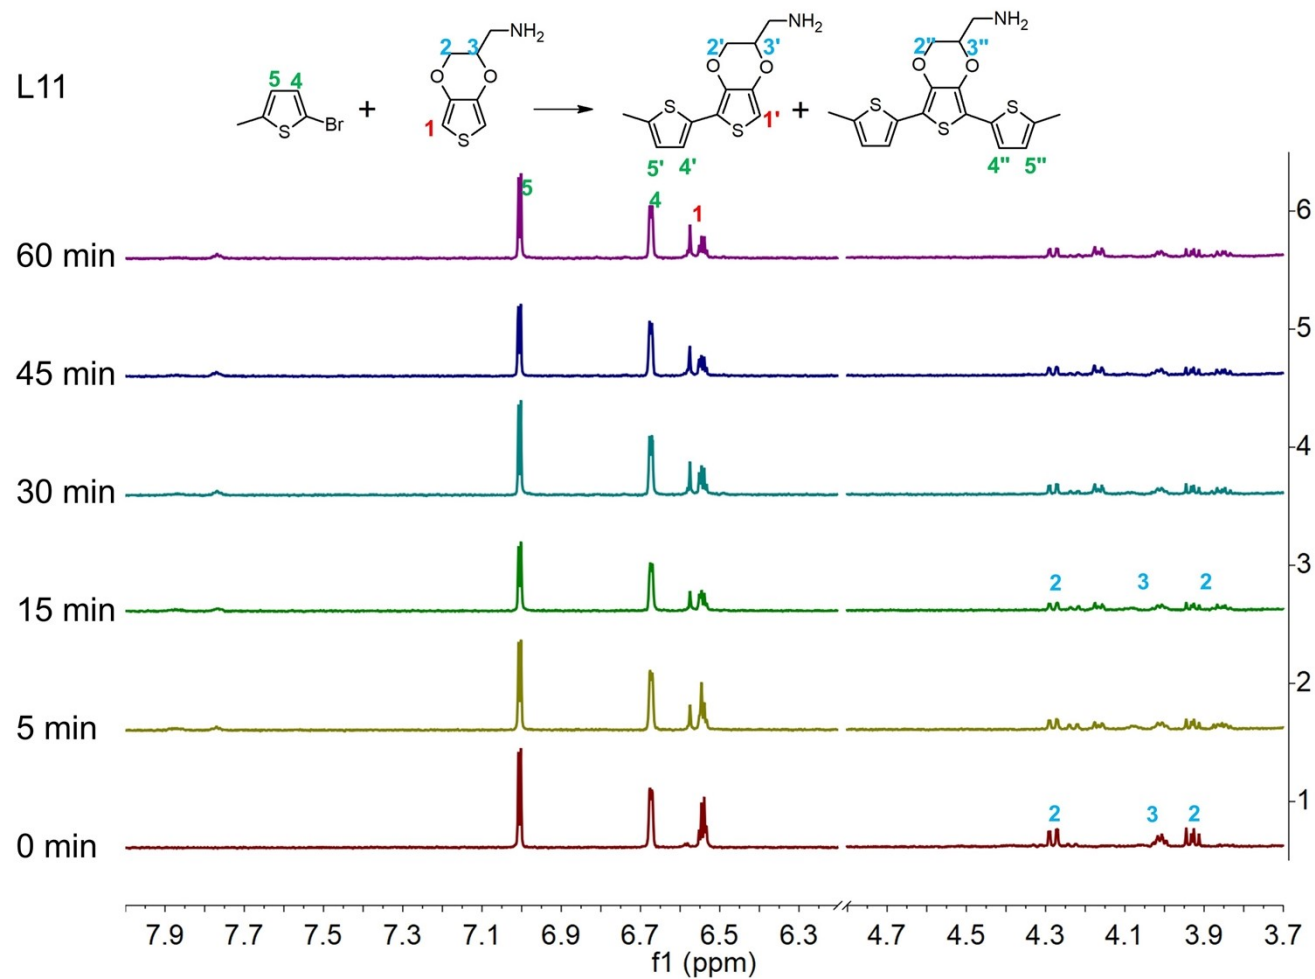

$^1\text{H}$  NMR collected at different time points direct arylation of EDOT-NH<sub>2</sub> with bromobenzene assisted by L1 (DMSO-d<sub>6</sub>)

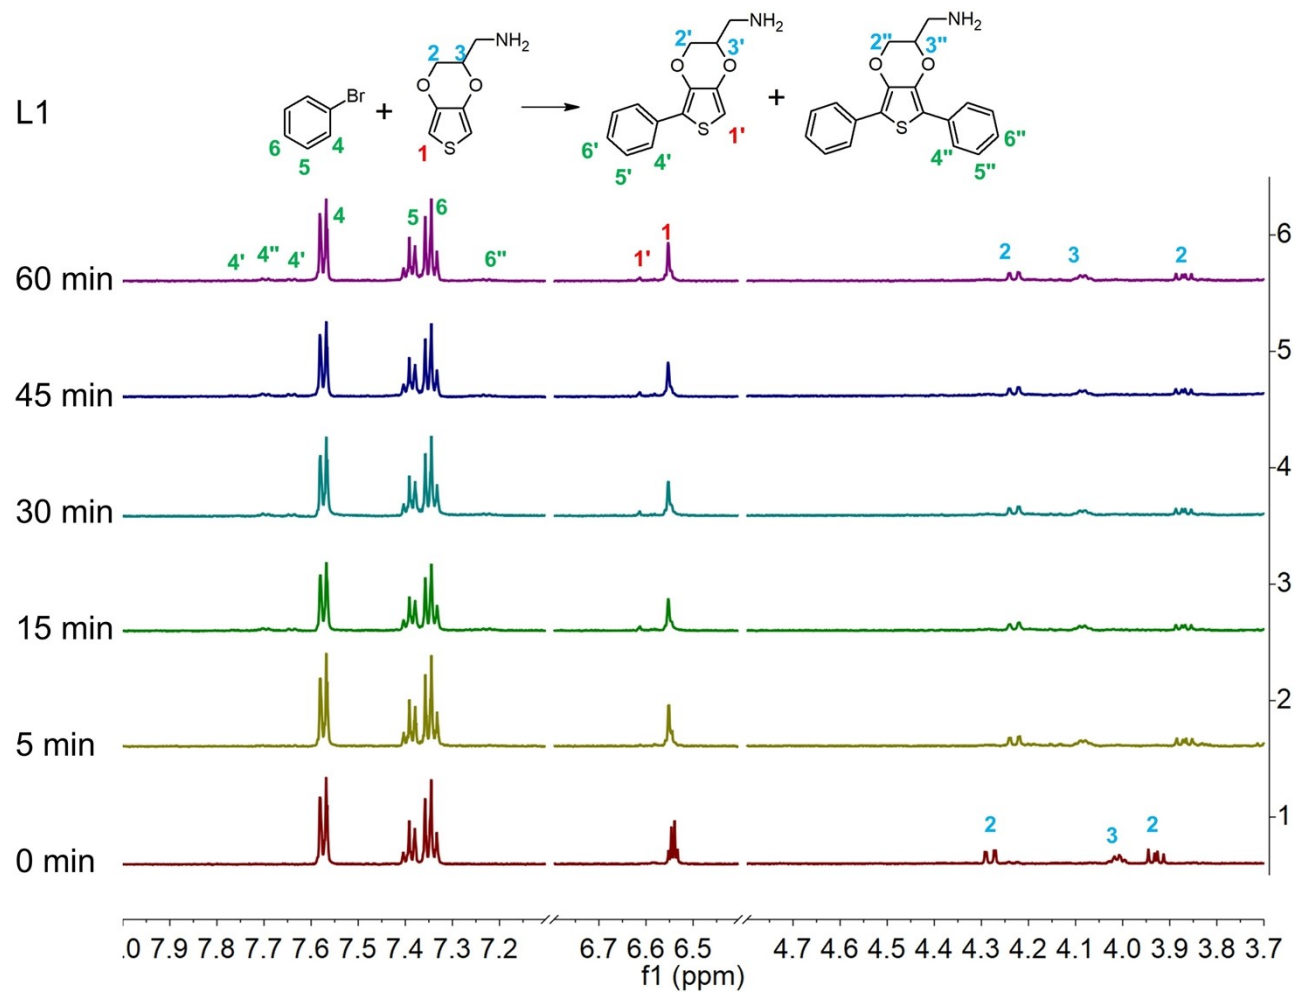

$^1\text{H}$  NMR collected at different time points direct arylation of EDOT-NH<sub>2</sub> with bromobenzene assisted by L2 (DMSO-d<sub>6</sub>)

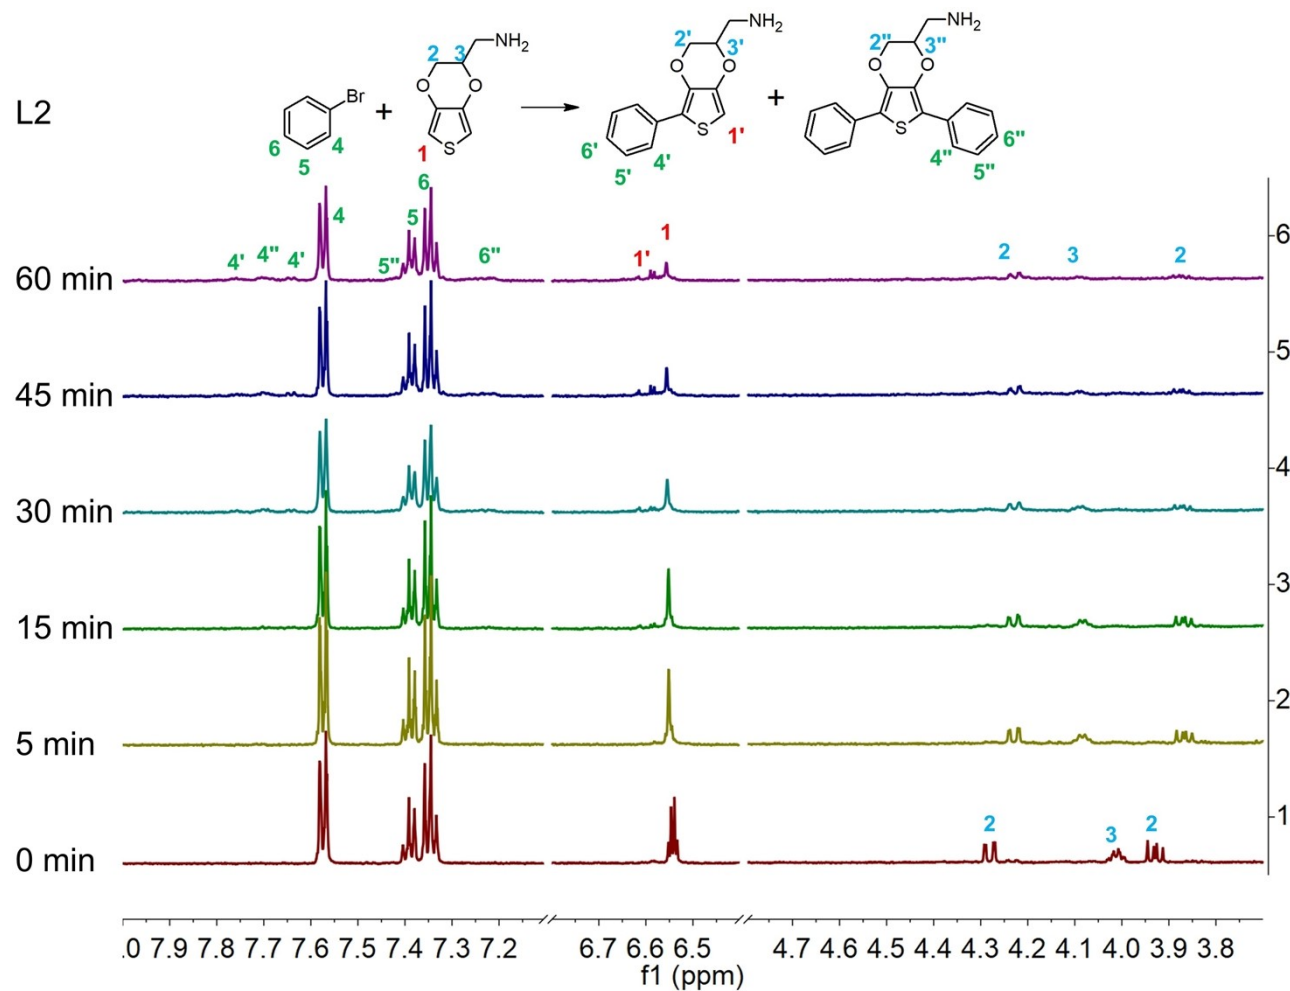

$^1\text{H}$  NMR collected at different time points direct arylation of EDOT-NH<sub>2</sub> with bromobenzene assisted by L3 (DMSO-d<sub>6</sub>)

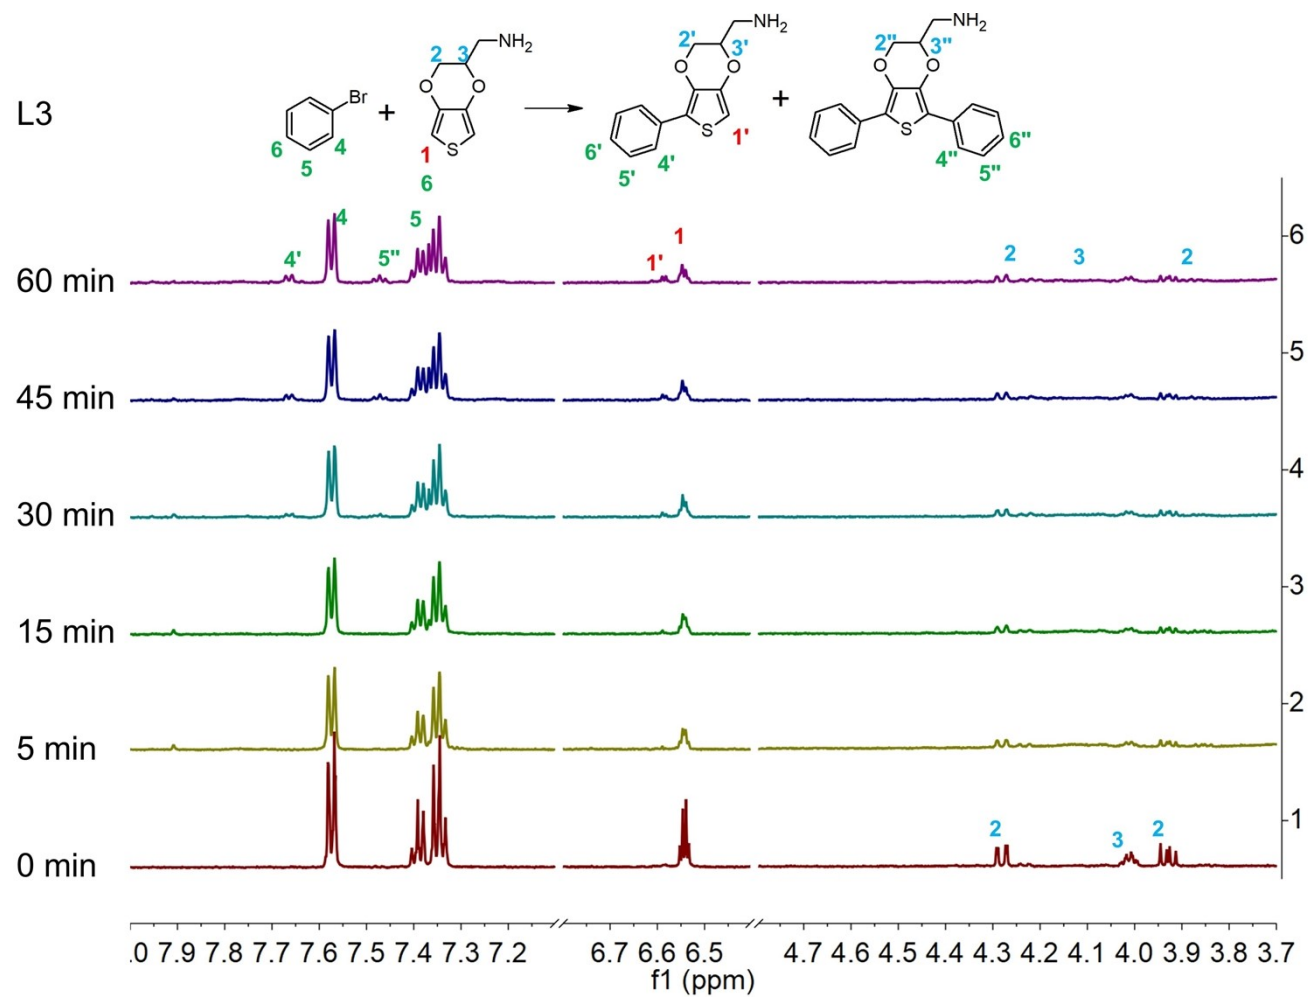



$^1\text{H}$  NMR collected at different time points direct arylation of EDOT-NH<sub>2</sub> with bromobenzene assisted by L5 (DMSO-d<sub>6</sub>)

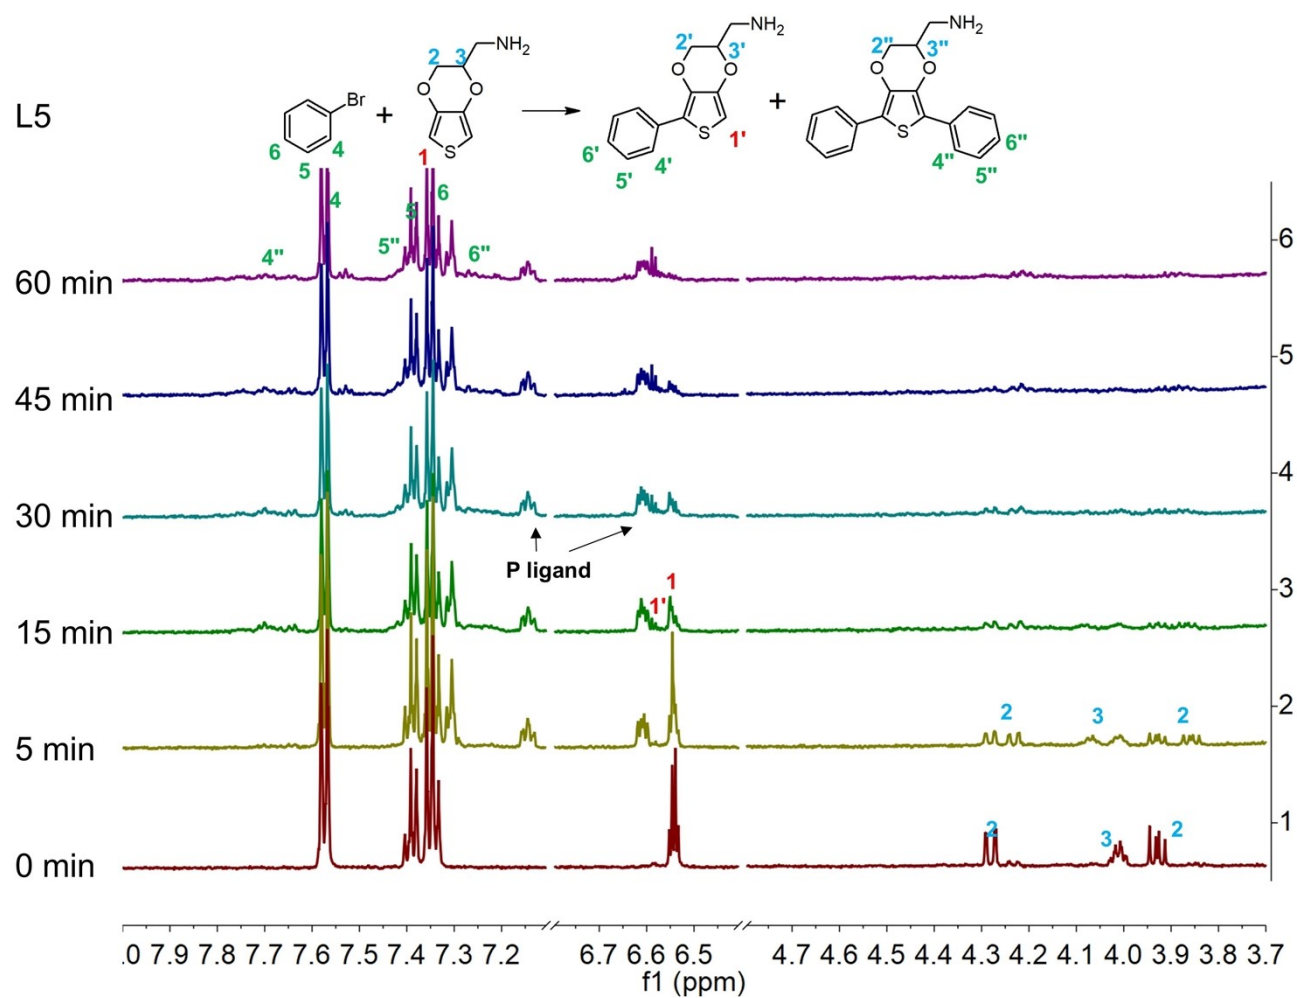

$^1\text{H}$  NMR collected at different time points direct arylation of EDOT-NH<sub>2</sub> with bromobenzene assisted by L6 (DMSO-d<sub>6</sub>)

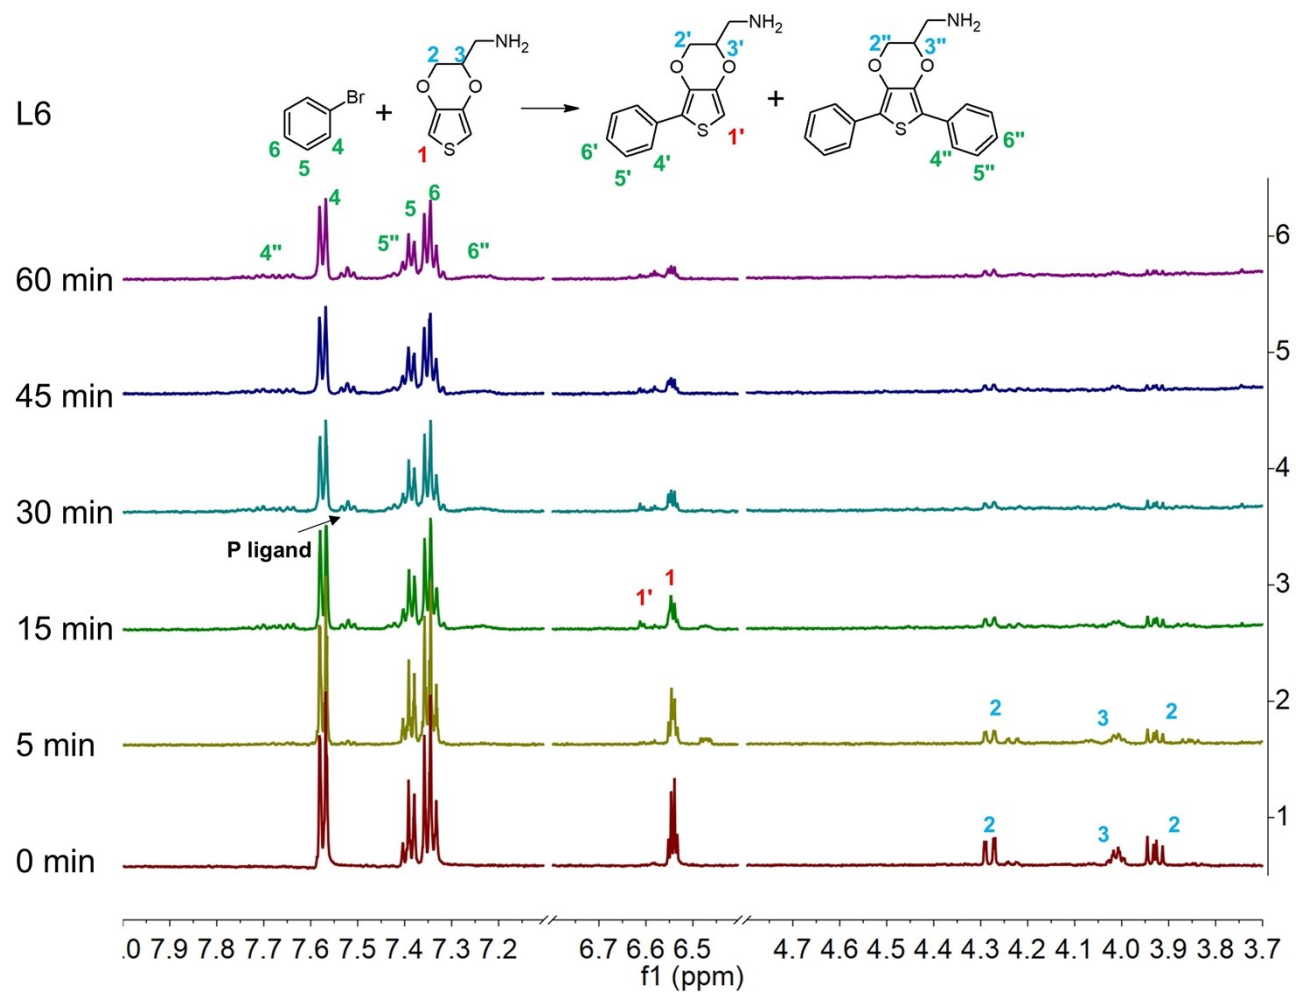

$^1\text{H}$  NMR collected at different time points direct arylation of EDOT-NH<sub>2</sub> with bromobenzene assisted by L7 (DMSO-d<sub>6</sub>)

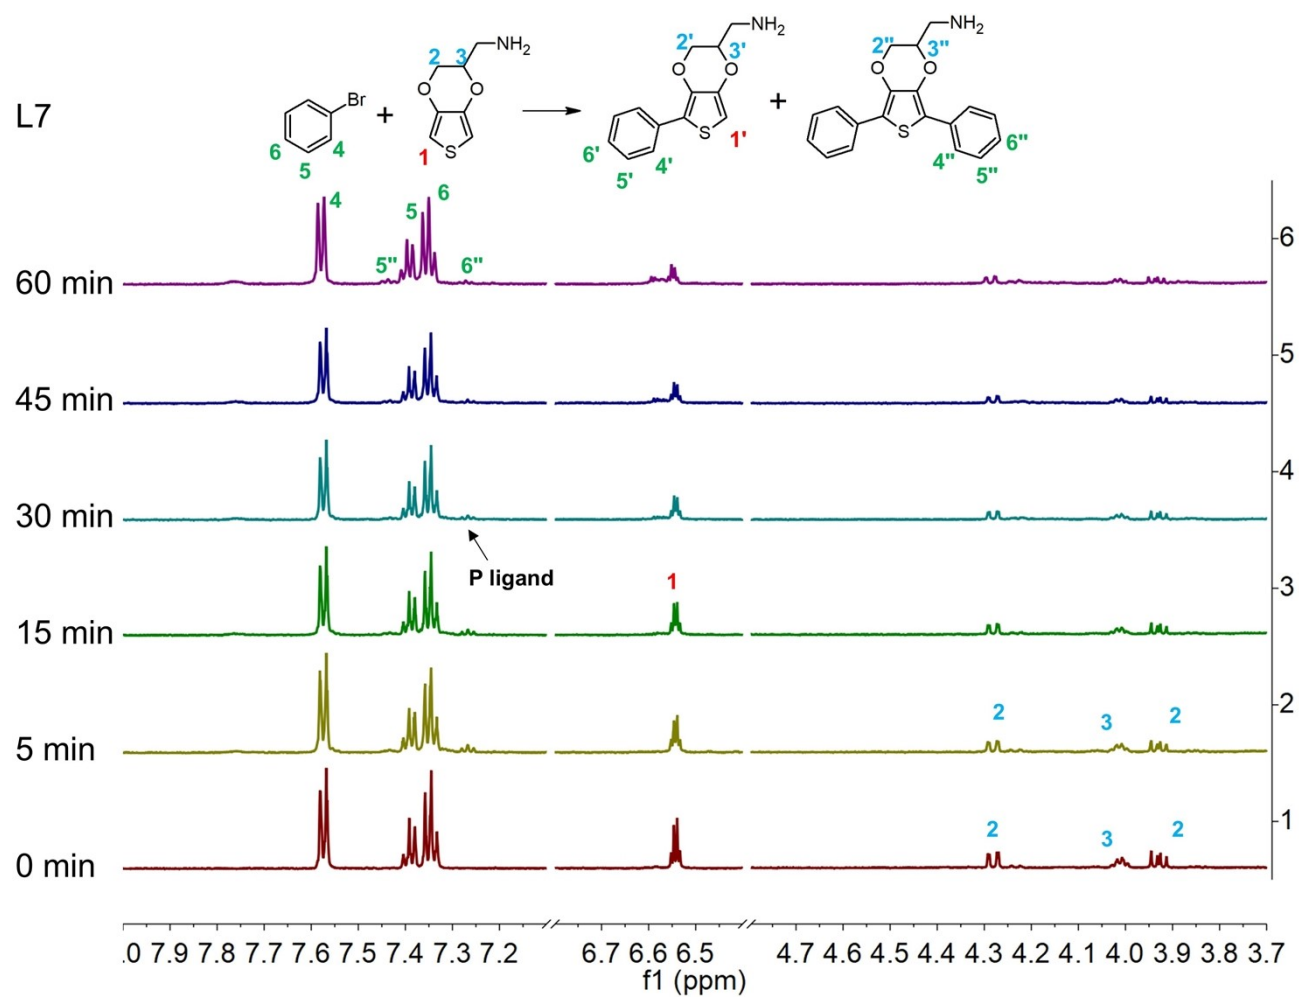



$^1\text{H}$  NMR collected at different time points direct arylation of EDOT-NH<sub>2</sub> with bromobenzene assisted by L9 (DMSO-d<sub>6</sub>)

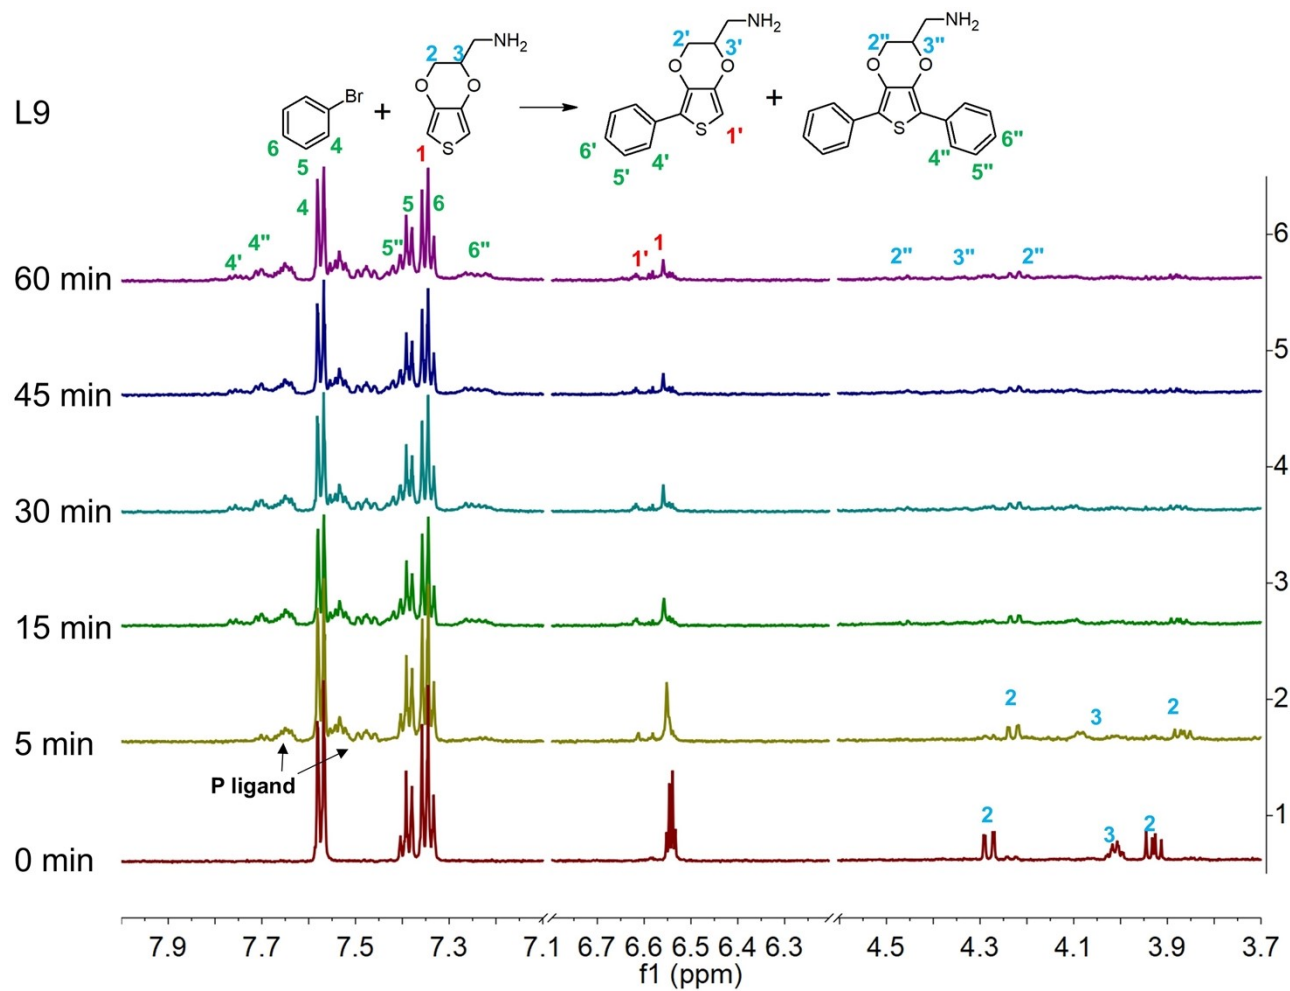

$^1\text{H}$  NMR collected at different time points direct arylation of EDOT-NH<sub>2</sub> with bromobenzene assisted by L10 (DMSO-d<sub>6</sub>)

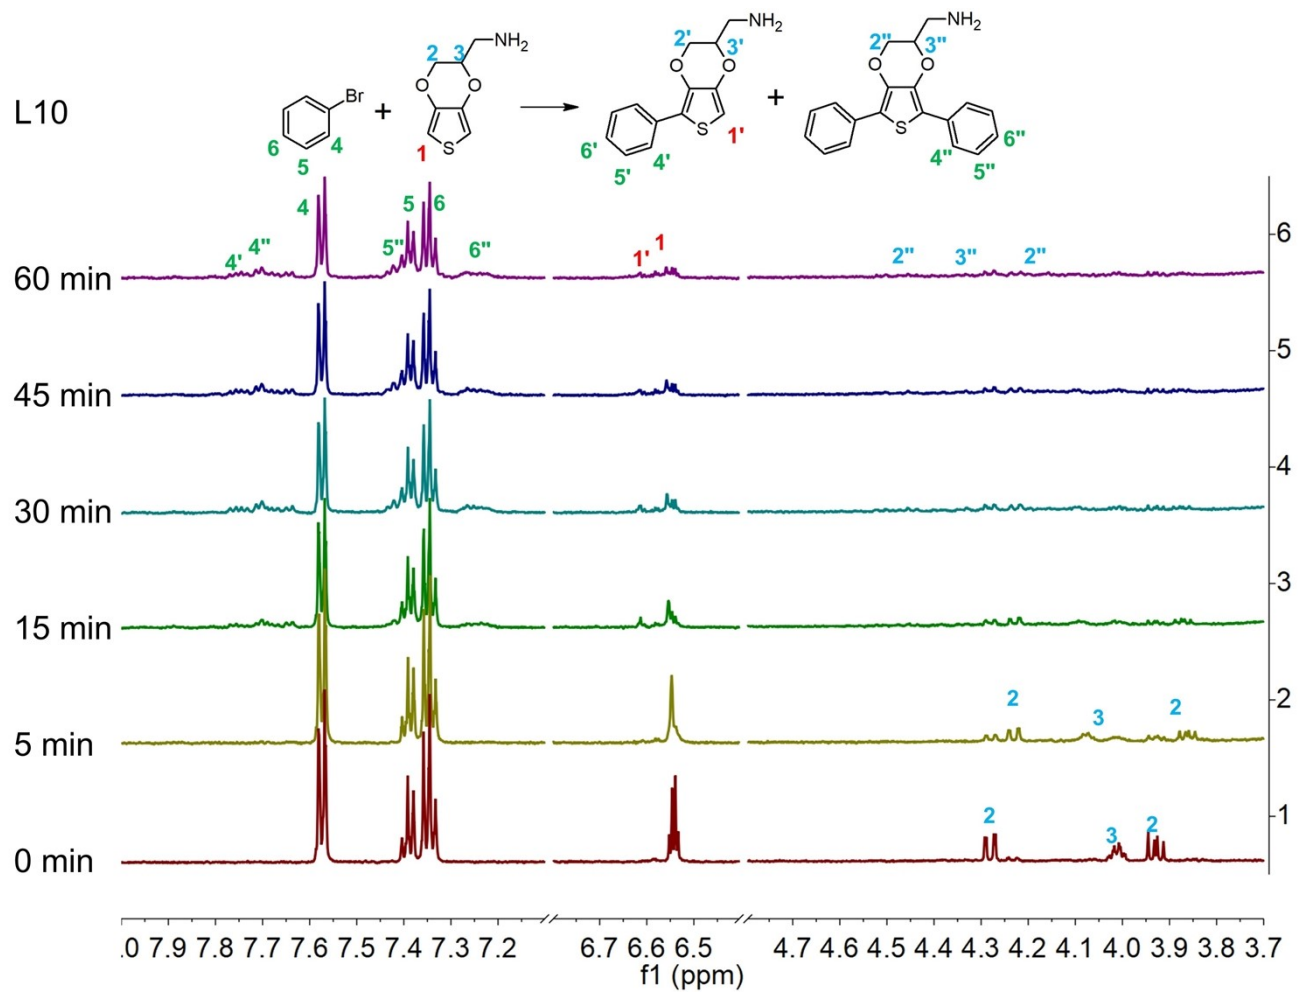

$^1\text{H}$  NMR collected at different time points direct arylation of EDOT-NH<sub>2</sub> with bromobenzene assisted by L11 (DMSO-d<sub>6</sub>)

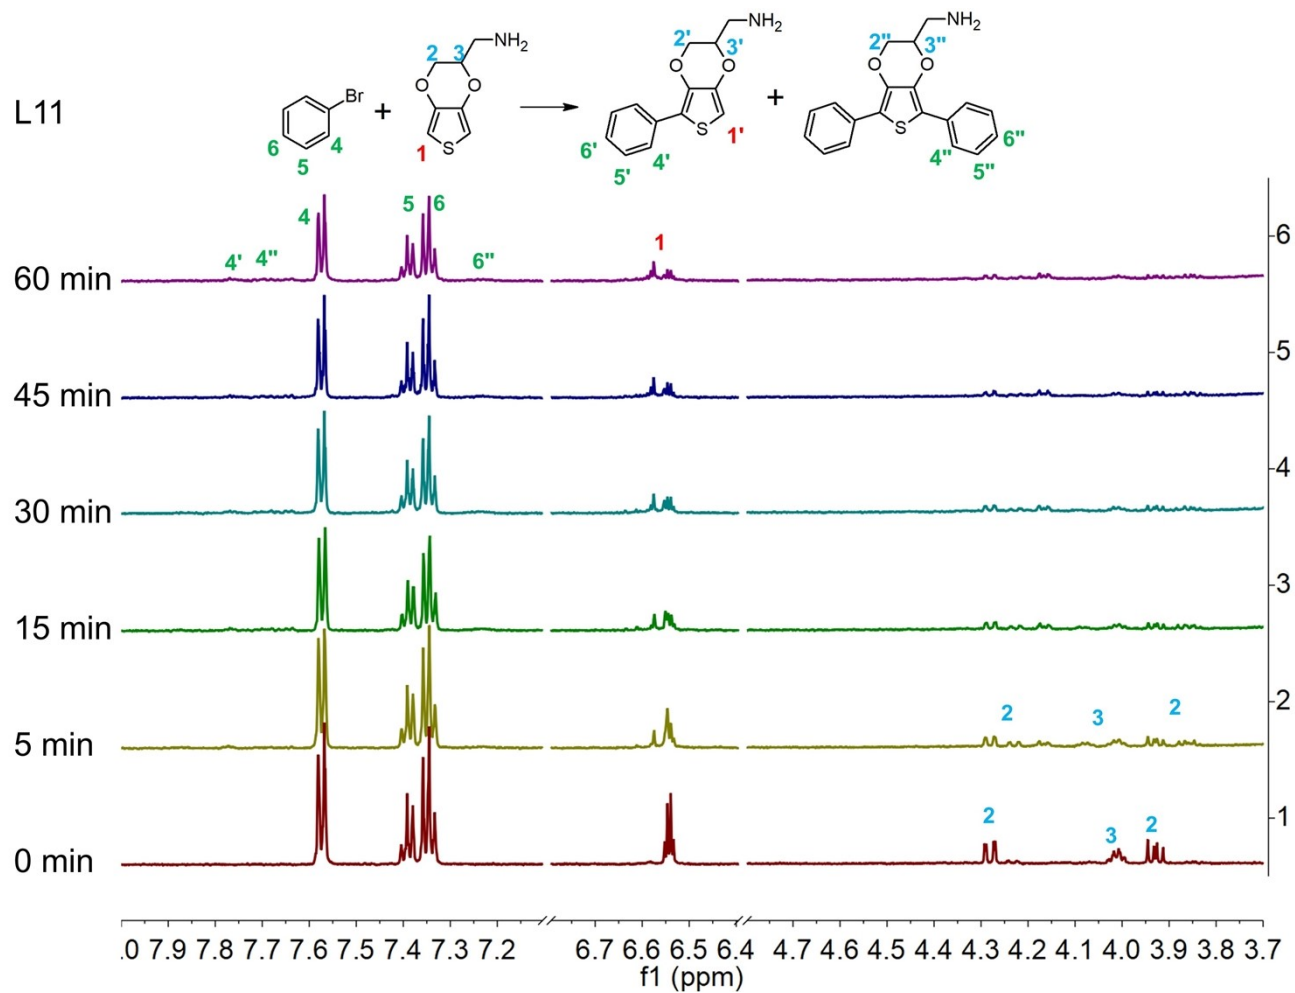

---

## 8. References and Notes

1. H. Meng, D. F. Perepichka, M. Bendikov, F. Wudl, G. Z. Pan, W. Yu, W. Dong and S. Brown, *J. Am. Chem. Soc.*, 2003, 125, 15151–15162.
2. W. Zhang, R. Jamal, R. Zhang, Z. Yu, Y. Yan, Y. Liu, Y. Ge and T. Abdiryim, *Phys. Chem. Chem. Phys.*, 2020, 22, 3592–3603.
3. B. Zhu, S. C. Luo, H. Zhao, H. A. Lin, J. Sekine, A. Nakao, C. Chen, Y. Yamashita and H. H. Yu, *Nat. Commun.*, 2014, 5, 4523.
4. W. Hai, T. Goda, H. Takeuchi, S. Yamaoka, Y. Horiguchi, A. Matsumoto and Y. Miyahara, *ACS Appl. Mater. Interfaces*, 2017, 9, 14162–14170.
5. D. G. Gorenstein and B. A. Luxon, In *Encyclopedia of Spectroscopy and Spectrometry*, 2017; pp 294–302.
6. J. W. Wackerly and J. F. Dunne, *J. Chem. Educ.*, 2017, 94, 1790–1793.
7. M. J. Frisch, G. W. Trucks, H. B. Schlegel, G. E. Scuseria, M. A. Robb, J. R. Cheeseman, G. Scalmani, V. Barone, B. Mennucci, G. A. Petersson, H. S211 Nakatsuji, M. Caricato, X. Li, H. P. Hratchian, A. F. Izmaylov, J. Bloino, G. Zheng, J. L. Sonnenberg, M. Hada, M. Ehara, K. Toyota, R. Fukuda, J. Hasegawa, M. Ishida, T. Nakajima, Y. Honda, O. Kitao, H. Nakai, T. Vreven, J. A. Montgomery, Jr., J. E. Peralta, F. Ogliaro, M. Bearpark, J. J. Heyd, E. Brothers, K. N. Kudin, V. N. Staroverov, T. Keith, R. Kobayashi, J. Normand, K. Raghavachari, A. Rendell, J. C. Burant, S. S. Iyengar, J. Tomasi, M. Cossi, N. Rega, J. M. Millam, M. Klene, J. E. Knox, J. B. Cross, V. Bakken, C. Adamo, J. Jaramillo, R. Gomperts, R. E. Stratmann, O. Yazyev, A. J. Austin, R. Cammi, C. Pomelli, J. W. Ochterski, R. L. Martin, K. Morokuma, V. G. Zakrzewski, G. A. Voth, P. Salvador, J. J. Dannenberg, S. Dapprich, A. D. Daniels, O. Farkas, J. B. Foresman, J. V. Ortiz, J. Cioslowski, and D. J. Fox, *Gaussian 09, Revision E.01*, Gaussian, Inc., Wallingford CT, 2013.
8. Y. Zhao and D. G. Truhlar, *J. Chem. Phys.*, 2006, 125, 194101.
9. D. Feller, *J. Comput. Chem.*, 1996, 17, 1571–1586.
10. W. Humphrey, A. Dalke and K. Schulten, *J. Mol. Graph.*, 1996, 14, 33–38.
11. I. A. Guzei and M. Wendt, *Dalton T.*, 2006, 33, 3991–3999.
12. S. Zhao, T. Gensch, B. Murray, Z. L. Niemeyer, M. S. Sigma and M. R. Biscoe, *Science*, 2018, 362, 670–674.
